# Supplementary material for: Transcriptomics integrated with metabolomics reveals the ameliorating effect of mussel-derived plasmalogens on high-fat diet-induced hyperlipidemia in zebrafish
Source: Royal Society of Chemistry journal article supplement (doi:10.1039/d3fo00063j), 2023-01-01
Supplement: d3fo00063j1.pdf [file d3fo00063j1.pdf]

## 1 SUPPLEMENTARY MATERIALS

### 2 **Transcriptomics integrated with metabolomics reveals the** 3 **amelioration of mussel-derived plasmalogens on high-fat** 4 **diet-induced hyperlipidemia in zebrafish**

5

#### 6 **Tables**

7 **Table S1. List of primers used in the qPCR experiments.**

8 **Table S2. Profile of 29090 transcripts and their expression levels identified in this study.**

9 **Table S3. Profile of 6161 metabolites identified based on MS/MS.**

10 **Table S4. The identified 20 potential metabolomics biomarkers based on MS/MS**

11

12 **Figure S1. Validation of RNA-seq data using qRT-PCR.** These genes were randomly selected.  
13 The mRNA expression level of each gene in the control group was set as 1, and those in HFD,  
14 HFD\_Pls and HFD\_ATV groups were quantified relative to it. The results are represented as  
15 average  $\pm$  SD of three biological replicates. Different letters on the data indicate significant  
16 differences compared with other groups ( $P < 0.05$ ).

17 **Figure S2. The SUS plot of the characteristic metabolites using the OPLS-DA model.**

18 **Figure S3. PLS-DA-based ROC curves of the 6 identified biomarkers. The associated AUC,**  
19 **95% CI, sensitivity, and specificity were presented.**

20

21 **Table S1. List of primers used in the qPCR experiments.**

22

| <b>Gene<br/>Symbol</b> | <b>Forward Primer (5'–3')</b> | <b>Reverse Primer (5'–3')</b> | <b>Amplicon<br/>length (bp)</b> |
|------------------------|-------------------------------|-------------------------------|---------------------------------|
| <i><b>β-Actin</b></i>  | GATGCGGAAACTGGCAAAGG          | GAGGAGGGCAAAGTGGTAAACG        | 115                             |
| <i><b>Cyp1a</b></i>    | AGGACAACATCAGAGACATCACCG      | CACTAGATAGACAACCGCCCAGG       | 178                             |
| <i><b>Cp</b></i>       | TAAGAAGTGCTTCCCGAACG          | GTCGGCCATAATCCCAAAT           | 88                              |
| <i><b>Gpx4a</b></i>    | TGCGTTTCTTAGGGTCTGCT          | TCTCAGAGTACTTGGCGTGC          | 223                             |
| <i><b>Lipca</b></i>    | ACTGAGCCTGAAGCCAAGATGAAG      | CGTCTACCGACCAGCCATGAATG       | 184                             |
| <i><b>Ndufs8b</b></i>  | TTACCATTACAGAGGAGGCT          | GGTAGTTGATCGTAGCTGGTTCT       | 167                             |
| <i><b>Pla2g12b</b></i> | CTGCTTGGCTTCCAGTTTGAT         | TCTGCAAAGGTCTCACATGC          | 199                             |
| <i><b>Pmt</b></i>      | AGGTGGGATTCAGTAATGTCC         | TCCTGTATAAACTCGTCCTCA         | 108                             |
| <i><b>Ptgdsb</b></i>   | TGCCTATGACTGACTTCGACCT        | AGCAGGAACCATCACTCTTTAGG       | 185                             |
| <i><b>Sod3a</b></i>    | TGAAGTCTCTCCCATCCCAA          | CCCTGACTGAGGTCTCCGTA          | 179                             |
| <i><b>Sult2st3</b></i> | GACCACATCAAAAAGCTGGCGAAAC     | GTGCTGTTACTGACGACACGATC       | 164                             |

23

24

25 **Table S4. The identified 20 potential metabolomics biomarkers based on MS/MS**

26

| Metabolite                                         | p(corr)[1] | Vip  |
|----------------------------------------------------|------------|------|
| Isobutyric acid                                    | 0.99       | 1.57 |
| Methylsuccinic acid                                | 0.99       | 1.57 |
| 2-Methoxy-3-methyl-9h-carbazole                    | 0.96       | 1.53 |
| 4-Ethylphenylsulfate                               | 0.93       | 1.48 |
| 2-Hydroxyacetaminophen sulfate                     | 0.88       | 1.41 |
| Pseudouridine                                      | 0.88       | 1.41 |
| Cysteinyl-lysine                                   | 0.86       | 1.37 |
| Uracil                                             | 0.86       | 1.37 |
| Pa(14:0/0:0)                                       | 0.85       | 1.36 |
| 8(s)-Hydroxy-(5z,9e,11z,14z)-eicosatetraenoic acid | 0.85       | 1.35 |
| Gamma-glutamylisoleucine                           | 0.83       | 1.33 |
| Gamma-glutamylphenylalanine                        | 0.83       | 1.32 |
| Indole                                             | 0.80       | 1.28 |
| 5-Methoxytryptophan                                | 0.80       | 1.28 |
| Cis-5,8,11,14,17-eicosapentaenoic acid (EPA)       | -0.80      | 1.27 |
| 5-alpha-Thdoc                                      | -0.78      | 1.24 |
| 5-Hydroxytryptophol glucuronide                    | -0.88      | 1.25 |
| Gamma-glutamyltyrosine                             | 0.76       | 1.23 |
| 3-Methylglutaryl carnitine                         | 0.89       | 1.43 |
| Glutaryl carnitine                                 | 0.87       | 1.25 |

27

28

29

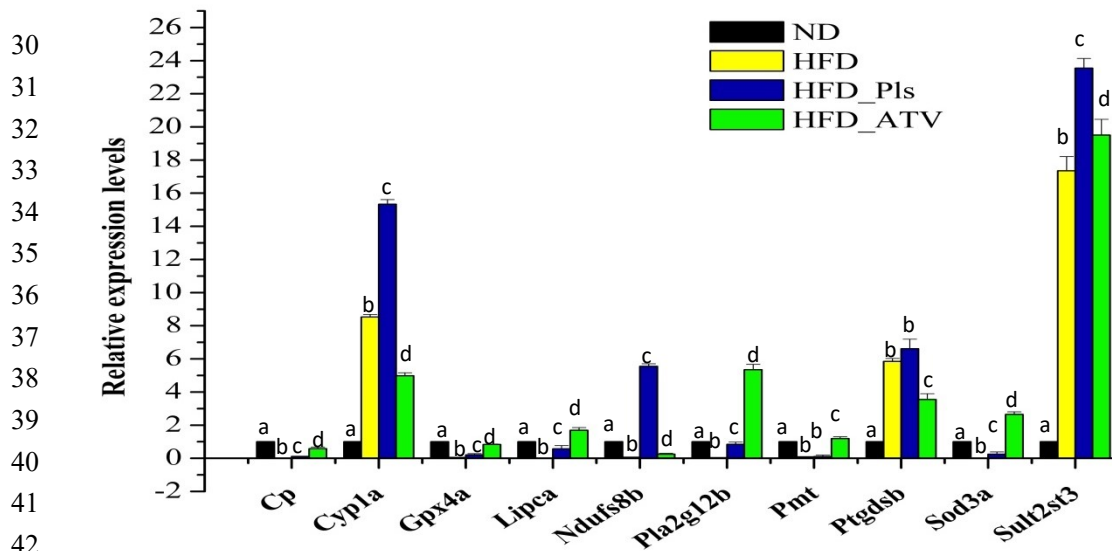

Figure S1

47

48  
49  
50  
51  
52  
53  
54  
55  
56  
57  
58  
59  
60  
61  
62  
63  
64  
65  
66  
67  
68  
69  
70  
71  
72  
73  
74  
75  
76  
77

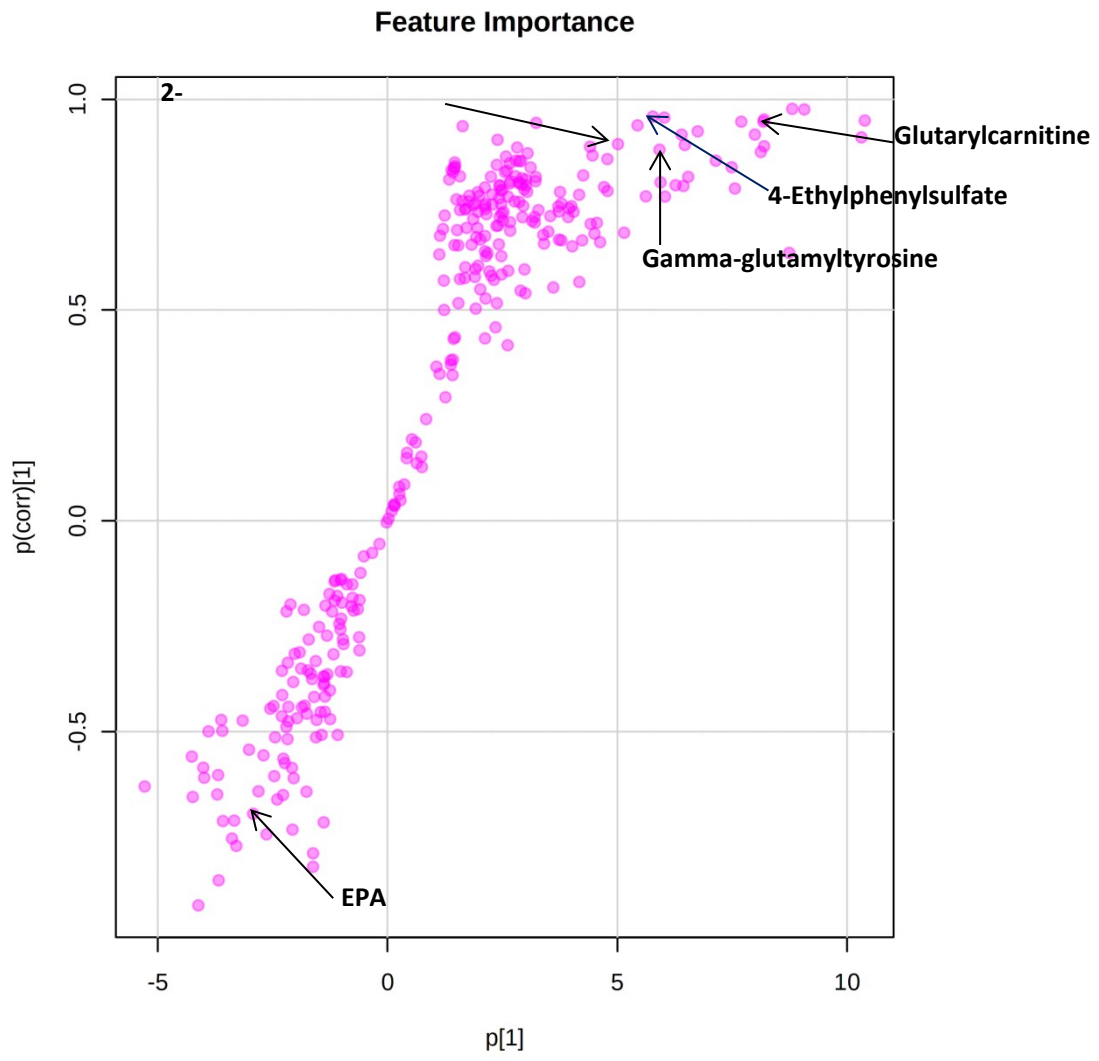

**Figure S2**

78

79

80

81

82

83

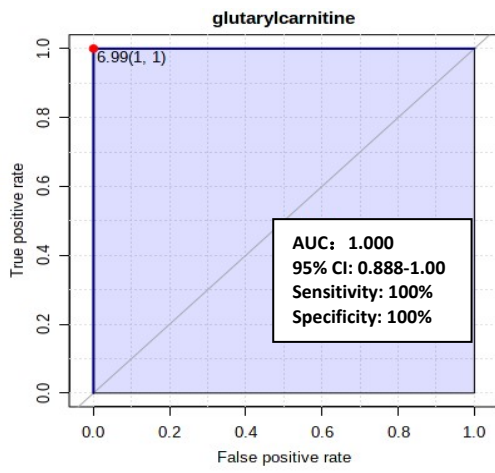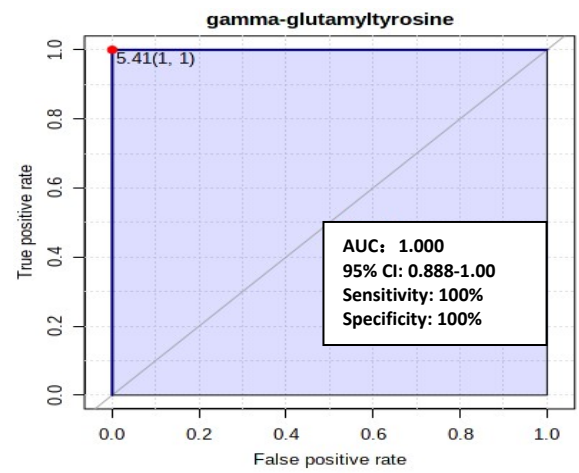

84

85

86

87

88

89

90

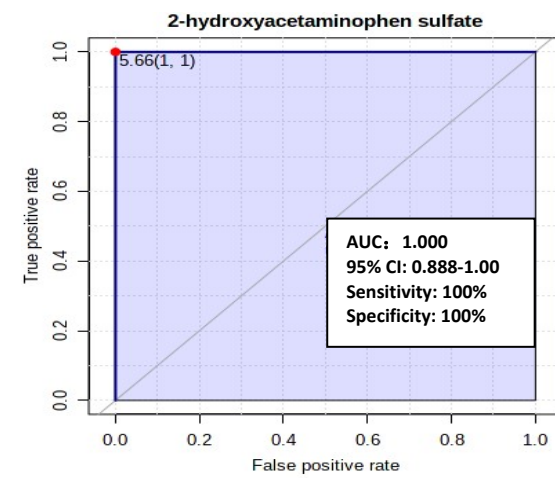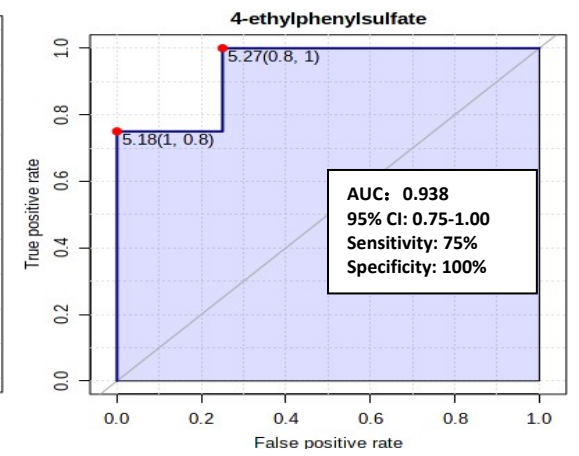

91

92

93

94

95

96

97

98

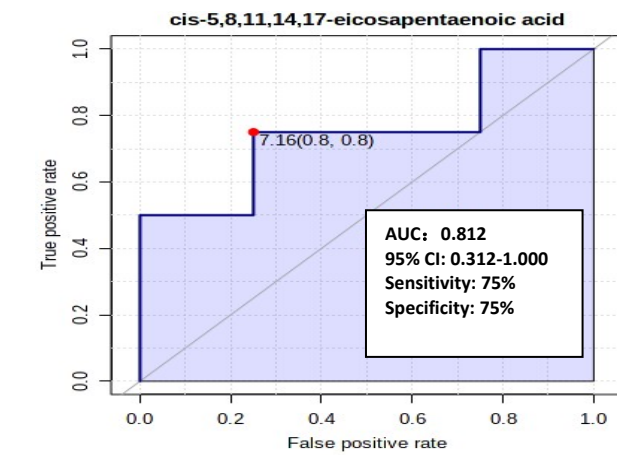

Figure S3
