# Supplementary material for: Transcriptomics integrated with metabolomics reveals the ameliorating effect of mussel-derived plasmalogens on high-fat diet-induced hyperlipidemia in zebrafish
Source: Royal Society of Chemistry journal article supplement (doi:10.1039/d3fo00063j), 2023-01-01
Supplement: d3fo00063j2.xlsx [file d3fo00063j2.xlsx]

## Sheet: S2
Table S2. Profile of 29090 transcripts and their expression levels identified in this study.
gene_id	gene_name	transcript_id	GO	KEGG	KO_ENTRY	EC	Description	trans_type	CK_1	CK_2	CK_3	HFD_1	HFD_2	HFD_3	HFD_ATV_1	HFD_ATV_2	HFD_ATV_3	HFD_Pls_1	HFD_Pls_2	HFD_Pls_3		CK	HLP	HLP_ATV	HLP_PLS
ENSDARG00000000001	slc35a5	ENSDART00000000004	GO:0000139(Golgi membrane);GO:0005794(Golgi apparatus);GO:0008643(carbohydrate transport);GO:0015136(sialic acid transmembrane transporter activity);GO:0015165(pyrimidine nucleotide-sugar transmembrane transporter activity);GO:0016020(membrane);GO:0016021(integral component of membrane);GO:0030173(integral component of Golgi membrane);GO:0090481(pyrimidine nucleotide-sugar transmembrane transport)		K15274		solute carrier family 35, member A5 [Source:ZFIN;Acc:ZDB-GENE-030616-55]		3.79509	9.88379	2.94741	6.14658	2.19155	2.07386	1.43426	2.83545	1.12263	3.89555	2.7208	1.32796
ENSDARG00000000002	ccdc80	ENSDART00000000005	GO:0001756(somitogenesis);GO:0005576(extracellular region)				coiled-coil domain containing 80 [Source:ZFIN;Acc:ZDB-GENE-030616-56]		1.46287	1.43701	2.30316	0.33079	1.85925	6.24318	3.20462	1.68003	2.45194	0.782537	0.549803	4.58294
ENSDARG00000000018	nrf1	ENSDART00000138183;ENSDART00000181044	GO:0000978(RNA polymerase II proximal promoter sequence-specific DNA binding);GO:0001046(core promoter sequence-specific DNA binding);GO:0001895(retina homeostasis);GO:0003407(neural retina development);GO:0003677(DNA binding);GO:0003700(DNA-binding transcription factor activity);GO:0005634(nucleus);GO:0006357(regulation of transcription by RNA polymerase II);GO:0007275(multicellular organism dev…	04371(Apelin signaling pathway);04371(Apelin signaling pathway)	K11831		nuclear respiratory factor 1 [Source:ZFIN;Acc:ZDB-GENE-001221-1]		13.0016	18.9526	7.35127	24.0958	5.261	5.13464	4.25318	9.62387	3.2125	15.7641	5.00045	3.21044
ENSDARG00000000019	ube2h	ENSDART00000124452	GO:0000166(nucleotide binding);GO:0005524(ATP binding);GO:0006511(ubiquitin-dependent protein catabolic process);GO:0016567(protein ubiquitination);GO:0016740(transferase activity);GO:0061631(ubiquitin conjugating enzyme activity)	04120(Ubiquitin mediated proteolysis)	K10576	EC:2.3.2.23	ubiquitin-conjugating enzyme E2H (UBC8 homolog, yeast) [Source:ZFIN;Acc:ZDB-GENE-030616-67]		20.9997	37.1313	98.7325	15.701	31.4253	20.5612	19.3907	27.6642	16.9305	11.248	17.3066	16.4062
ENSDARG00000000068	slc9a3r1a	ENSDART00000000069;ENSDART00000136272	GO:0005515(protein binding);GO:0005886(plasma membrane);GO:0006612(protein targeting to membrane);GO:0012505(endomembrane system);GO:0016020(membrane);GO:0021591(ventricular system development);GO:0032947(protein-containing complex scaffold activity);GO:0043113(receptor clustering);GO:0055078(sodium ion homeostasis);GO:0071599(otic vesicle development);GO:0071599(otic vesicle development)	04530(Tight junction);04530(Tight junction)	K13365		SLC9A3 regulator 1a [Source:ZFIN;Acc:ZDB-GENE-031006-7]		13.184	10.5869	5.37091	12.5409	3.63677	2.76719	16.9286	18.143	2.53967	8.47779	4.32065	2.99173
ENSDARG00000000069	dap	ENSDART00000000070;ENSDART00000142631;ENSDART00000140891;ENSDART00000134964	GO:0010507(negative regulation of autophagy);GO:0034198(cellular response to amino acid starvation);GO:0070513(death domain binding);GO:0097190(apoptotic signaling pathway);GO:0097190(apoptotic signaling pathway)				death-associated protein [Source:ZFIN;Acc:ZDB-GENE-000511-3]		59.1492	22.0217	9.31308	23.1501	7.45433	8.84218	20.6182	47.4376	4.4193	48.2362	10.7804	7.59903
ENSDARG00000000086	itsn1	ENSDART00000132378;ENSDART00000139573;ENSDART00000150545	GO:0005085(guanyl-nucleotide exchange factor activity);GO:0005089(Rho guanyl-nucleotide exchange factor activity);GO:0005509(calcium ion binding);GO:0005515(protein binding);GO:0035023(regulation of Rho protein signal transduction);GO:0035556(intracellular signal transduction);GO:0035556(intracellular signal transduction)		K20045		intersectin 1 (SH3 domain protein) [Source:ZFIN;Acc:ZDB-GENE-030616-226]		4.16582	6.04304	2.31587	5.79328	2.37105	3.31983	2.27845	5.99671	1.60591	2.55553	2.50624	2.49138
ENSDARG00000000103	myh10	ENSDART00000151114;ENSDART00000151635	GO:0000166(nucleotide binding);GO:0003774(motor activity);GO:0003779(actin binding);GO:0005515(protein binding);GO:0005524(ATP binding);GO:0008360(regulation of cell shape);GO:0016459(myosin complex);GO:0021555(midbrain-hindbrain boundary morphogenesis);GO:0051015(actin filament binding);GO:0070650(actin filament bundle distribution);GO:0070650(actin filament bundle distribution)	04530(Tight junction);04530(Tight junction)	K10352		myosin, heavy chain 10, non-muscle [Source:ZFIN;Acc:ZDB-GENE-030616-162]		14.5484	26.2726	4.81042	27.9294	2.80966	5.41498	5.95689	17.7333	3.66436	14.7762	2.76097	7.33828
ENSDARG00000000142	tmem267	ENSDART00000135082;ENSDART00000186615	GO:0016020(membrane);GO:0016021(integral component of membrane);GO:0016021(integral component of membrane)				transmembrane protein 267 [Source:ZFIN;Acc:ZDB-GENE-030616-546]		0.953003	1.7931	1.58083	1.75833	1.54406	0.327787	0.780695	2.01486	0.454454	1.81116	0.465277	0.608027
ENSDARG00000000151	thraa	ENSDART00000151127;ENSDART00000000160;ENSDART00000177021;ENSDART00000151575;ENSDART00000151633	GO:0000122(negative regulation of transcription by RNA polymerase II);GO:0000976(transcription regulatory region sequence-specific DNA binding);GO:0000977(RNA polymerase II regulatory region sequence-specific DNA binding);GO:0000981(DNA-binding transcription factor activity, RNA polymerase II-specific);GO:0002154(thyroid hormone mediated signaling pathway);GO:0003677(DNA binding);GO:0003700(DNA-b…	04080(Neuroactive ligand-receptor interaction);04080(Neuroactive ligand-receptor interaction)	K05547		thyroid hormone receptor alpha a [Source:ZFIN;Acc:ZDB-GENE-990415-263]		4.30159	8.95574	4.4879	11.1568	1.2459	2.41437	1.92786	4.98203	1.51745	5.67219	2.26232	1.89471
ENSDARG00000000161	itsn2a	ENSDART00000153266;ENSDART00000180278;ENSDART00000125142	GO:0005085(guanyl-nucleotide exchange factor activity);GO:0005089(Rho guanyl-nucleotide exchange factor activity);GO:0005509(calcium ion binding);GO:0005515(protein binding);GO:0006897(endocytosis);GO:0035023(regulation of Rho protein signal transduction);GO:0035556(intracellular signal transduction);GO:0035556(intracellular signal transduction)		K20045		intersectin 2a [Source:ZFIN;Acc:ZDB-GENE-041014-84]		0.517799	0.886731	0.293977	0.594349	0.188136	0.425194	0.455065	0.487017	0.260705	0.253854	0.151955	0.188414
ENSDARG00000000175	hoxb2a	ENSDART00000146636	GO:0003677(DNA binding);GO:0003700(DNA-binding transcription factor activity);GO:0005634(nucleus);GO:0006355(regulation of transcription, DNA-templated);GO:0007275(multicellular organism development);GO:0043565(sequence-specific DNA binding)		K09302		homeobox B2a [Source:ZFIN;Acc:ZDB-GENE-990415-103]		1.80504	0.268844	0.4588	0.669357	0.255634	0.594797	0.309498	0.718099	0.131687	0.459883	0.15759	0.125708
ENSDARG00000000183	ptpn4b	ENSDART00000000192;ENSDART00000126784	GO:0004721(phosphoprotein phosphatase activity);GO:0004725(protein tyrosine phosphatase activity);GO:0005515(protein binding);GO:0005737(cytoplasm);GO:0005856(cytoskeleton);GO:0006470(protein dephosphorylation);GO:0008092(cytoskeletal protein binding);GO:0016311(dephosphorylation);GO:0016787(hydrolase activity);GO:0016791(phosphatase activity);GO:0035335(peptidyl-tyrosine dephosphorylation);GO:00…		K18037	EC:3.1.3.48	protein tyrosine phosphatase, non-receptor type 4b [Source:ZFIN;Acc:ZDB-GENE-030131-6259]		2.7504	4.31851	2.1675	4.7475	1.73675	2.03814	1.78172	2.72327	1.35823	2.20076	0.969108	0.986825
ENSDARG00000000189	sema6e	ENSDART00000160555;ENSDART00000135723;ENSDART00000000198	GO:0001755(neural crest cell migration);GO:0005515(protein binding);GO:0005615(extracellular space);GO:0005887(integral component of plasma membrane);GO:0016020(membrane);GO:0016021(integral component of membrane);GO:0030215(semaphorin receptor binding);GO:0030335(positive regulation of cell migration);GO:0038191(neuropilin binding);GO:0045499(chemorepellent activity);GO:0048843(negative regulati…				sema domain, transmembrane domain (TM), and cytoplasmic domain, (semaphorin) 6E [Source:ZFIN;Acc:ZDB-GENE-040724-119]		1.23966	1.63581	2.09675	2.29027	2.74607	4.1812	2.21505	1.78348	2.70292	0.996736	3.04304	1.82705
ENSDARG00000000212	krt97	ENSDART00000105808	GO:0005198(structural molecule activity);GO:0005882(intermediate filament)		K07604		keratin 97 [Source:ZFIN;Acc:ZDB-GENE-040718-78]		175.62	136.41	218.238	37.0166	511.563	528.542	315.277	247.018	275.444	61.0839	885.753	420.808
ENSDARG00000000229	usp49	ENSDART00000171036;ENSDART00000037069	GO:0005737(cytoplasm);GO:0006508(proteolysis);GO:0006511(ubiquitin-dependent protein catabolic process);GO:0008233(peptidase activity);GO:0008234(cysteine-type peptidase activity);GO:0008270(zinc ion binding);GO:0016579(protein deubiquitination);GO:0016787(hydrolase activity);GO:0036459(thiol-dependent ubiquitinyl hydrolase activity);GO:0046872(metal ion binding);GO:0046872(metal ion binding)		K11834	EC:3.4.19.12	ubiquitin specific peptidase 49 [Source:ZFIN;Acc:ZDB-GENE-050208-484]		0.467695	0.710123	1.36811	0.22586	1.57606	1.51072	0.657891	1.35238	0.68445	0.555397	1.75318	1.21071
ENSDARG00000000241	slc40a1	ENSDART00000000250	GO:0005381(iron ion transmembrane transporter activity);GO:0006811(ion transport);GO:0016020(membrane);GO:0016021(integral component of membrane);GO:0034755(iron ion transmembrane transport)	04216(Ferroptosis)	K14685		solute carrier family 40 (iron-regulated transporter), member 1 [Source:ZFIN;Acc:ZDB-GENE-000511-8]		37.431	48.0122	40.8885	1.74126	11.6124	9.52005	8.90277	76.0954	6.00095	5.77674	5.64954	3.48582		42.1106	7.62457	30.333	4.9707
ENSDARG00000000324	dcaf8	ENSDART00000139564	GO:0005515(protein binding)		K11804		DDB1 and CUL4 associated factor 8 [Source:ZFIN;Acc:ZDB-GENE-070912-578]		9.25811	9.79907	16.2457	8.4996	17.6758	14.39	10.3414	13.9523	9.49227	6.57856	9.95103	7.72523
ENSDARG00000000349	cfap300	ENSDART00000151109	GO:0003674(molecular_function);GO:0005575(cellular_component);GO:0008150(biological_process)				cilia and flagella associated protein 300 [Source:ZFIN;Acc:ZDB-GENE-040724-203]		0.214904	0	0.383329	0	0.123537	0.23131	4.10149	12.8177	0.110598	0.052528	0.326036	0.107603
ENSDARG00000000369	prkag3b	ENSDART00000135209;ENSDART00000132747	GO:0005575(cellular_component);GO:0032559(adenyl ribonucleotide binding);GO:0071900(regulation of protein serine/threonine kinase activity);GO:0071900(regulation of protein serine/threonine kinase activity)	04068(FoxO signaling pathway);04371(Apelin signaling pathway);04530(Tight junction);04910(Insulin signaling pathway);04920(Adipocytokine signaling pathway);04920(Adipocytokine signaling pathway)	K07200		protein kinase, AMP-activated, gamma 3b non-catalytic subunit [Source:ZFIN;Acc:ZDB-GENE-060421-6938]		1.20831	0.487939	3.19418	0.273241	4.07874	4.82064	3.23447	0.628056	2.76555	0.158879	4.07752	3.20276
ENSDARG00000000370	triob	ENSDART00000000382	GO:0004672(protein kinase activity);GO:0004674(protein serine/threonine kinase activity);GO:0005085(guanyl-nucleotide exchange factor activity);GO:0005089(Rho guanyl-nucleotide exchange factor activity);GO:0005515(protein binding);GO:0005524(ATP binding);GO:0006468(protein phosphorylation);GO:0016301(kinase activity);GO:0016310(phosphorylation);GO:0035023(regulation of Rho protein signal transduc…				trio Rho guanine nucleotide exchange factor b [Source:ZFIN;Acc:ZDB-GENE-030616-399]		0.491032	0.348931	0.784645	8.06245	0.764692	1.48399	0.873459	0.588593	0.88321	2.42798	0.598658	1.02225
ENSDARG00000000380	pde6a	ENSDART00000000392;ENSDART00000160752;ENSDART00000189157	GO:0004114(3',5'-cyclic-nucleotide phosphodiesterase activity);GO:0005515(protein binding);GO:0005623(cell);GO:0007165(signal transduction);GO:0007186(G protein-coupled receptor signaling pathway);GO:0008081(phosphoric diester hydrolase activity);GO:0016787(hydrolase activity);GO:0046872(metal ion binding);GO:0047555(3',5'-cyclic-GMP phosphodiesterase activity);GO:0051480(regulation of cytosolic …	00230(Purine metabolism);04744(Phototransduction);04744(Phototransduction)	K08718	EC:3.1.4.35	phosphodiesterase 6A, cGMP-specific, rod, alpha [Source:ZFIN;Acc:ZDB-GENE-030616-42]		0.0601016	0.0307731	0.0271364	0.10654	0.113036	0.171391	0.134977	0.81191	0.0865002	0.0632945	0.105177	0.134787
ENSDARG00000000394	matr3l1	ENSDART00000144168;ENSDART00000184244;ENSDART00000136630	GO:0003676(nucleic acid binding);GO:0003723(RNA binding);GO:0005634(nucleus);GO:0008270(zinc ion binding);GO:0008270(zinc ion binding)		K13213		matrin 3-like 1.1 [Source:ZFIN;Acc:ZDB-GENE-030616-40]		17.3219	20.3725	10.2019	33.5074	10.1814	14.1704	12.3626	15.5266	10.874	17.4486	13.8382	9.42018
ENSDARG00000000423	si:ch73-314g15	ENSDART00000138914;ENSDART00000186670	GO:0008942(nitrite reductase [NAD(P)H] activity);GO:0016491(oxidoreductase activity);GO:0051537(2 iron, 2 sulfur cluster binding);GO:0055114(oxidation-reduction process);GO:0055114(oxidation-reduction process)				si:ch73-314g15.3 [Source:ZFIN;Acc:ZDB-GENE-030616-19]		6.94972	10.8445	3.46898	12.4802	3.16315	2.58542	2.39277	3.25772	2.71609	5.58146	3.41733	2.11581
ENSDARG00000000442	slc39a13	ENSDART00000121972;ENSDART00000184425	GO:0016020(membrane);GO:0016021(integral component of membrane);GO:0030001(metal ion transport);GO:0046873(metal ion transmembrane transporter activity);GO:0055085(transmembrane transport);GO:0055085(transmembrane transport)		K14719		solute carrier family 39 (zinc transporter), member 13 [Source:ZFIN;Acc:ZDB-GENE-030616-17]		15.2821	22.6114	4.23612	30.3394	1.68971	5.14994	3.18587	4.76993	1.83832	15.9547	2.91334	4.78487
ENSDARG00000000460	nitr2b	ENSDART00000060383	GO:0016020(membrane);GO:0016021(integral component of membrane)				novel immune-type receptor 2b [Source:ZFIN;Acc:ZDB-GENE-001106-6]		0.64991	0	0.199697	0.564433	0.618401	0.351219	0.777279	1.43143	0.525282	0	0.485034	1.75766
ENSDARG00000000472	cntn2	ENSDART00000000486;ENSDART00000190721	GO:0001764(neuron migration);GO:0005515(protein binding);GO:0007399(nervous system development);GO:0007409(axonogenesis);GO:0007417(central nervous system development);GO:0031175(neuron projection development);GO:0045773(positive regulation of axon extension);GO:0048677(axon extension involved in regeneration);GO:0048677(axon extension involved in regeneration)	04514(Cell adhesion molecules (CAMs));04514(Cell adhesion molecules (CAMs))	K06760		contactin 2 [Source:ZFIN;Acc:ZDB-GENE-990630-12]		0.315824	1.21363	0.0656397	1.06647	0.029669	0.0404027	0	0.116612	0	0.467355	0	0
ENSDARG00000000474	TNNI1 (1 of many)	ENSDART00000000488	GO:0003674(molecular_function);GO:0005861(troponin complex);GO:0006936(muscle contraction)				troponin I type 1a (skeletal, slow) [Source:NCBI gene;Acc:558408]		0	0	0.118084	0	0	0	0	0	0	0	0	0.450421
ENSDARG00000000476	pms1	ENSDART00000188260;ENSDART00000157398;ENSDART00000002053	GO:0003677(DNA binding);GO:0005524(ATP binding);GO:0005634(nucleus);GO:0006298(mismatch repair);GO:0016887(ATPase activity);GO:0030983(mismatched DNA binding);GO:0032300(mismatch repair complex);GO:0032389(MutLalpha complex);GO:0032389(MutLalpha complex)		K10864		PMS1 homolog 1, mismatch repair system component [Source:ZFIN;Acc:ZDB-GENE-030616-528]		3.98127	7.45819	2.83404	10.8462	0.6031	1.25261	1.0908	3.42088	0.818438	5.06671	1.15515	0.722293
ENSDARG00000000489	upf3b	ENSDART00000010019;ENSDART00000133248	GO:0000184(nuclear-transcribed mRNA catabolic process, nonsense-mediated decay);GO:0003676(nucleic acid binding);GO:0003729(mRNA binding);GO:0005730(nucleolus);GO:0005737(cytoplasm);GO:0045727(positive regulation of translation);GO:0045727(positive regulation of translation)	03013(RNA transport);03015(mRNA surveillance pathway);03015(mRNA surveillance pathway)	K14328		UPF3B, regulator of nonsense mediated mRNA decay [Source:ZFIN;Acc:ZDB-GENE-040426-1630]		14.8842	18.3552	25.5423	25.521	19.2335	15.1645	11.676	17.6897	10.5653	10.5239	12.9025	11.7805
ENSDARG00000000503	stx1b	ENSDART00000081951;ENSDART00000174611	GO:0000149(SNARE binding);GO:0005484(SNAP receptor activity);GO:0005886(plasma membrane);GO:0006886(intracellular protein transport);GO:0006887(exocytosis);GO:0006906(vesicle fusion);GO:0008021(synaptic vesicle);GO:0012505(endomembrane system);GO:0016020(membrane);GO:0016021(integral component of membrane);GO:0016192(vesicle-mediated transport);GO:0031201(SNARE complex);GO:0031629(synaptic vesicl…	04130(SNARE interactions in vesicular transport);04130(SNARE interactions in vesicular transport)	K08486		syntaxin 1B [Source:ZFIN;Acc:ZDB-GENE-000330-4]		0.226163	0.1551	0.324436	0.0254814	0.673304	0.877774	0.572642	0.137655	0.620346	0.0680252	0.159307	0.568476
ENSDARG00000000516	ankar	ENSDART00000100342;ENSDART00000193879	GO:0005515(protein binding);GO:0005515(protein binding)				ankyrin and armadillo repeat containing [Source:ZFIN;Acc:ZDB-GENE-030616-533]		0.0777591	0.0630105	0.116217	0	0.1767	0.0469882	4.12908	11.2595	0.115495	0.0182548	0.0847904	0
ENSDARG00000000529	ofd1	ENSDART00000000552	GO:0005515(protein binding)		K16480		oral-facial-digital syndrome 1 [Source:ZFIN;Acc:ZDB-GENE-030131-5427]		7.17998	11.3048	3.59889	19.8088	1.97814	3.11818	2.63848	6.11466	1.39081	6.92776	1.77951	1.12783
ENSDARG00000000540	asnsd1	ENSDART00000166785;ENSDART00000180078;ENSDART00000187769;ENSDART00000131681;ENSDART00000000564;ENSDART00000182552	GO:0004066(asparagine synthase (glutamine-hydrolyzing) activity);GO:0006529(asparagine biosynthetic process);GO:0006529(asparagine biosynthetic process)				asparagine synthetase domain containing 1 [Source:ZFIN;Acc:ZDB-GENE-030616-362]		3.39145	5.40612	2.32704	5.98882	2.29896	2.15413	1.93989	2.94761	1.79324	3.31924	2.24502	2.08776
ENSDARG00000000542	gtf2e1	ENSDART00000000566;ENSDART00000161068;ENSDART00000138386;ENSDART00000148195	GO:0000993(RNA polymerase II complex binding);GO:0001097(TFIIH-class transcription factor complex binding);GO:0001113(transcriptional open complex formation at RNA polymerase II promoter);GO:0005673(transcription factor TFIIE complex);GO:0006367(transcription initiation from RNA polymerase II promoter);GO:0043565(sequence-specific DNA binding);GO:0043565(sequence-specific DNA binding)	03022(Basal transcription factors);03022(Basal transcription factors)	K03136		general transcription factor IIE, polypeptide 1, alpha [Source:ZFIN;Acc:ZDB-GENE-041210-221]		6.01315	5.31757	1.72169	16.1581	1.42899	1.36586	1.31646	2.57464	0.831621	5.45746	1.54082	1.22496
ENSDARG00000000551	slc1a4	ENSDART00000057584	GO:0015293(symporter activity);GO:0016020(membrane);GO:0016021(integral component of membrane);GO:0055085(transmembrane transport)		K05615		solute carrier family 1 (glutamate/neutral amino acid transporter), member 4 [Source:ZFIN;Acc:ZDB-GENE-030616-566]		0.264399	2.01432	4.35501	1.08631	3.12607	0.611344	1.48612	1.05957	0.302926	0.431369	0.292804	1.7215
ENSDARG00000000563	ttn	ENSDART00000125953	GO:0004672(protein kinase activity);GO:0005515(protein binding);GO:0005524(ATP binding);GO:0005865(striated muscle thin filament);GO:0006468(protein phosphorylation);GO:0006936(muscle contraction);GO:0007519(skeletal muscle tissue development);GO:0008307(structural constituent of muscle);GO:0014866(skeletal myofibril assembly);GO:0030017(sarcomere);GO:0030018(Z disc);GO:0030239(myofibril assembly…		K12567	EC:2.7.11.1	titin, tandem duplicate 1 [Source:ZFIN;Acc:ZDB-GENE-030616-413]		7.5131	1.28083	9.61109	1.21517	41.5143	50.1473	38.1811	4.70905	47.3351	3.01423	38.5138	42.2942
ENSDARG00000000567	znf281a	ENSDART00000155518;ENSDART00000193045	GO:0003676(nucleic acid binding);GO:0005634(nucleus);GO:0006974(cellular response to DNA damage stimulus);GO:0016020(membrane);GO:0016021(integral component of membrane);GO:0016021(integral component of membrane)				zinc finger protein 281a [Source:ZFIN;Acc:ZDB-GENE-131126-34]		1.02966	1.22368	1.35368	1.27677	1.7385	1.81731	1.63995	2.52273	1.16896	1.00025	1.63944	1.05873
ENSDARG00000000568	ell	ENSDART00000032770;ENSDART00000100642;ENSDART00000185845;ENSDART00000179672	GO:0001570(vasculogenesis);GO:0003746(translation elongation factor activity);GO:0006366(transcription by RNA polymerase II);GO:0006368(transcription elongation from RNA polymerase II promoter);GO:0006414(translational elongation);GO:0008023(transcription elongation factor complex);GO:0042795(snRNA transcription by RNA polymerase II);GO:0042795(snRNA transcription by RNA polymerase II)		K15183		elongation factor RNA polymerase II [Source:ZFIN;Acc:ZDB-GENE-030131-3946]		17.8901	47.4747	35.941	31.9337	42.0776	12.0912	15.7366	7.32671	17.6657	14.5681	16.2926	12.6318
ENSDARG00000000588	grasp	ENSDART00000103343	GO:0005515(protein binding)				GRP1 (general receptor for phosphoinositides 1)-associated scaffold protein [Source:ZFIN;Acc:ZDB-GENE-060312-30]		5.51929	8.86878	3.71972	13.6255	4.78622	4.21914	2.56954	4.18576	1.77664	5.91002	5.20549	3.36878
ENSDARG00000000606	dnah6	ENSDART00000141317;ENSDART00000054388	GO:0003777(microtubule motor activity);GO:0005524(ATP binding);GO:0005858(axonemal dynein complex);GO:0007018(microtubule-based movement);GO:0008569(ATP-dependent microtubule motor activity, minus-end-directed);GO:0016887(ATPase activity);GO:0030286(dynein complex);GO:0045503(dynein light chain binding);GO:0045505(dynein intermediate chain binding);GO:0051959(dynein light intermediate chain bindi…		K10408		dynein, axonemal, heavy chain 6 [Source:ZFIN;Acc:ZDB-GENE-030616-623]		0.0236096	0.0548552	0.128744	0.0784824	0.0688035	0.0478694	2.69386	6.04682	0.0462494	0.0242929	0.0961882	0.02294
ENSDARG00000000631	ptpn4a	ENSDART00000000670;ENSDART00000078823;ENSDART00000188836;ENSDART00000151941	GO:0004721(phosphoprotein phosphatase activity);GO:0004725(protein tyrosine phosphatase activity);GO:0005515(protein binding);GO:0005737(cytoplasm);GO:0005856(cytoskeleton);GO:0006470(protein dephosphorylation);GO:0008092(cytoskeletal protein binding);GO:0016311(dephosphorylation);GO:0016787(hydrolase activity);GO:0016791(phosphatase activity);GO:0035335(peptidyl-tyrosine dephosphorylation);GO:00…		K18037	EC:3.1.3.48	protein tyrosine phosphatase, non-receptor type 4a [Source:ZFIN;Acc:ZDB-GENE-030616-449]		6.22083	13.3391	18.7297	10.2181	7.99423	6.56361	3.42787	4.04346	4.02776	5.59883	6.03988	3.50543
ENSDARG00000000638	opn1mw4	ENSDART00000000678	GO:0001750(photoreceptor outer segment);GO:0004930(G protein-coupled receptor activity);GO:0005887(integral component of plasma membrane);GO:0007165(signal transduction);GO:0007186(G protein-coupled receptor signaling pathway);GO:0007601(visual perception);GO:0007602(phototransduction);GO:0008020(G protein-coupled photoreceptor activity);GO:0009584(detection of visible light);GO:0009881(photorece…	04744(Phototransduction)	K04250		opsin 1 (cone pigments), medium-wave-sensitive, 4 [Source:ZFIN;Acc:ZDB-GENE-990604-43]		0	0	0	0.277137	0	0	0.082202	0.046724	0	0	0	0
ENSDARG00000000651	osgepl1	ENSDART00000000693	GO:0002949(tRNA threonylcarbamoyladenosine modification);GO:0004222(metalloendopeptidase activity);GO:0005739(mitochondrion);GO:0006508(proteolysis);GO:0008033(tRNA processing);GO:0016740(transferase activity);GO:0016746(transferase activity, transferring acyl groups);GO:0016747(transferase activity, transferring acyl groups other than amino-acyl groups);GO:0046872(metal ion binding);GO:0061711(N…		K01409	EC:2.3.1.234	O-sialoglycoprotein endopeptidase-like 1 [Source:ZFIN;Acc:ZDB-GENE-030616-532]		2.3472	2.95673	1.05139	3.89791	0.40505	1.53465	0.748501	1.50166	0.482719	1.62323	0.916454	0.663796
ENSDARG00000000656	psmb9a	ENSDART00000000698	GO:0000502(proteasome complex);GO:0002376(immune system process);GO:0004175(endopeptidase activity);GO:0004298(threonine-type endopeptidase activity);GO:0005634(nucleus);GO:0005737(cytoplasm);GO:0005839(proteasome core complex);GO:0006508(proteolysis);GO:0008233(peptidase activity);GO:0010498(proteasomal protein catabolic process);GO:0010499(proteasomal ubiquitin-independent protein catabolic pro…	03050(Proteasome)	K02741	EC:3.4.25.1	proteasome subunit beta 9a [Source:ZFIN;Acc:ZDB-GENE-990415-140]		12.3986	1.9632	12.8302	2.94255	62.7904	35.2819	22.0837	44.2633	10.4641	0.427219	24.2564	32.6308
ENSDARG00000000666	creg2	ENSDART00000142726	GO:0005575(cellular_component);GO:0048037(cofactor binding)				cellular repressor of E1A-stimulated genes 2 [Source:ZFIN;Acc:ZDB-GENE-041114-173]		17.0318	15.0857	35.79	1.725	17.1684	16.2156	16.9324	29.5777	10.4711	6.32713	15.0453	14.1062
ENSDARG00000000690	sypl2b	ENSDART00000000744	GO:0008021(synaptic vesicle);GO:0016020(membrane);GO:0016021(integral component of membrane)				synaptophysin-like 2b [Source:ZFIN;Acc:ZDB-GENE-050417-309]		4.58839	2.61403	5.46039	0.894507	5.31735	4.10081	3.64301	3.00952	2.13497	0.957616	2.03553	4.9864
ENSDARG00000000729	daxx	ENSDART00000122815;ENSDART00000123443;ENSDART00000124094	GO:0003714(transcription corepressor activity);GO:0005634(nucleus);GO:1903507(negative regulation of nucleic acid-templated transcription);GO:1903507(negative regulation of nucleic acid-templated transcription)	04010(MAPK signaling pathway);04210(Apoptosis);05168(Herpes simplex virus 1 infection);05168(Herpes simplex virus 1 infection)	K02308		death-domain associated protein [Source:ZFIN;Acc:ZDB-GENE-010110-3]		11.4609	22.6662	9.40938	32.8394	4.47701	4.85418	3.32921	5.75662	1.92355	13.585	4.56594	1.51149
ENSDARG00000000730	slc6a22	ENSDART00000128723;ENSDART00000132484	GO:0005328(neurotransmitter:sodium symporter activity);GO:0006836(neurotransmitter transport);GO:0015293(symporter activity);GO:0016020(membrane);GO:0016021(integral component of membrane);GO:0055085(transmembrane transport);GO:0055085(transmembrane transport)		K05046		solute carrier family 6 member 22, tandem duplicate 1 [Source:ZFIN;Acc:ZDB-GENE-030616-629]		6.28542	13.3377	35.2995	11.3623	7.38564	3.52007	6.11871	14.1397	3.2989	7.1196	4.17863	3.86652
ENSDARG00000000747	lcmt2	ENSDART00000144481;ENSDART00000112415	GO:0005515(protein binding);GO:0006481(C-terminal protein methylation);GO:0008168(methyltransferase activity);GO:0008175(tRNA methyltransferase activity);GO:0018423(protein C-terminal leucine carboxyl O-methyltransferase activity);GO:0030488(tRNA methylation);GO:0031591(wybutosine biosynthetic process);GO:0032259(methylation);GO:0032259(methylation)		K15451	2.3.1.231;EC:2.1.1.290	leucine carboxyl methyltransferase 2 [Source:ZFIN;Acc:ZDB-GENE-110714-2]		3.23086	5.86968	1.59022	8.98454	0.797859	1.0161	0.480569	1.07149	0.254987	3.78034	1.34008	0.421835
ENSDARG00000000760	znf511	ENSDART00000000831	GO:0003676(nucleic acid binding);GO:0003677(DNA binding);GO:0005634(nucleus);GO:0046872(metal ion binding)				zinc finger protein 511 [Source:ZFIN;Acc:ZDB-GENE-030616-621]		6.30914	15.4315	38.2513	26.646	3.17977	3.22783	2.1727	2.58772	2.11213	8.30477	2.18108	1.60755
ENSDARG00000000767	spi1b	ENSDART00000126831;ENSDART00000036729;ENSDART00000093279;ENSDART00000173776	GO:0000981(DNA-binding transcription factor activity, RNA polymerase II-specific);GO:0003677(DNA binding);GO:0003700(DNA-binding transcription factor activity);GO:0005515(protein binding);GO:0005634(nucleus);GO:0006355(regulation of transcription, DNA-templated);GO:0006357(regulation of transcription by RNA polymerase II);GO:0010628(positive regulation of gene expression);GO:0030099(myeloid cell …		K09438		Spi-1 proto-oncogene b [Source:ZFIN;Acc:ZDB-GENE-980526-164]		6.96428	3.14376	6.11572	0.435054	10.6902	6.52111	2.98206	4.51557	3.31541	0.683869	2.5421	2.9106
ENSDARG00000000779	scfd1	ENSDART00000134735	GO:0005737(cytoplasm);GO:0006888(endoplasmic reticulum to Golgi vesicle-mediated transport);GO:0006904(vesicle docking involved in exocytosis);GO:0016192(vesicle-mediated transport);GO:0031101(fin regeneration);GO:0034436(glycoprotein transport);GO:0048702(embryonic neurocranium morphogenesis);GO:0051216(cartilage development)		K19998		sec1 family domain containing 1 [Source:ZFIN;Acc:ZDB-GENE-030116-3]		19.1155	23.7156	18.7628	27.7315	13.9707	13.0886	8.19584	12.5251	6.35195	15.3861	13.7942	10.6139
ENSDARG00000000796	nr4a1	ENSDART00000166682;ENSDART00000184206;ENSDART00000000876;ENSDART00000157479;ENSDART00000155905	GO:0000977(RNA polymerase II regulatory region sequence-specific DNA binding);GO:0000978(RNA polymerase II proximal promoter sequence-specific DNA binding);GO:0003677(DNA binding);GO:0003700(DNA-binding transcription factor activity);GO:0003707(steroid hormone receptor activity);GO:0004879(nuclear receptor activity);GO:0005634(nucleus);GO:0005667(transcription factor complex);GO:0006355(regulatio…	04010(MAPK signaling pathway);04010(MAPK signaling pathway)	K04465		nuclear receptor subfamily 4, group A, member 1 [Source:ZFIN;Acc:ZDB-GENE-040704-11]		1.49157	5.31549	4.07746	4.77691	13.7957	4.06745	8.46796	1.41725	5.96647	1.71224	2.26939	18.3854
ENSDARG00000000804	rassf6	ENSDART00000000887;ENSDART00000136932	GO:0005575(cellular_component);GO:0007165(signal transduction);GO:0042981(regulation of apoptotic process);GO:0042981(regulation of apoptotic process)				Ras association (RalGDS/AF-6) domain family 6 [Source:ZFIN;Acc:ZDB-GENE-030616-513]		2.61813	0.990792	1.97162	0.616169	6.25096	10.1791	3.63889	6.83239	2.71257	1.42718	10.6969	4.87175
ENSDARG00000000830	telo2	ENSDART00000131975		03460(Fanconi anemia pathway);04150(mTOR signaling pathway)	K11137		TEL2, telomere maintenance 2, homolog (S. cerevisiae) [Source:ZFIN;Acc:ZDB-GENE-061103-523]		5.23209	7.91941	1.82743	14.3004	1.90615	2.27854	1.01799	2.88987	1.33293	8.31553	1.66366	1.48733
ENSDARG00000000837	snx9a	ENSDART00000142672;ENSDART00000104476;ENSDART00000098593	GO:0000278(mitotic cell cycle);GO:0000281(mitotic cytokinesis);GO:0005515(protein binding);GO:0006886(intracellular protein transport);GO:0006897(endocytosis);GO:0015031(protein transport);GO:0016020(membrane);GO:0030659(cytoplasmic vesicle membrane);GO:0031410(cytoplasmic vesicle);GO:0035091(phosphatidylinositol binding);GO:0035091(phosphatidylinositol binding)		K17923		sorting nexin 9a [Source:ZFIN;Acc:ZDB-GENE-030616-66]		5.5867	4.9056	2.83446	8.40241	2.91281	6.49835	4.34046	8.542	1.49623	5.16561	3.04912	2.83999
ENSDARG00000000853	dstyk	ENSDART00000106645	GO:0000166(nucleotide binding);GO:0004672(protein kinase activity);GO:0004674(protein serine/threonine kinase activity);GO:0004712(protein serine/threonine/tyrosine kinase activity);GO:0004713(protein tyrosine kinase activity);GO:0005524(ATP binding);GO:0005737(cytoplasm);GO:0005886(plasma membrane);GO:0006468(protein phosphorylation);GO:0007275(multicellular organism development);GO:0016020(memb…		K16288	EC:2.7.12.1	dual serine/threonine and tyrosine protein kinase [Source:ZFIN;Acc:ZDB-GENE-040826-2]		13.0065	19.9031	31.019	21.929	17.1575	12.4082	8.8676	10.8495	8.73552	12.9103	10.7461	4.33037
ENSDARG00000000857	mapk14a	ENSDART00000187430;ENSDART00000040362;ENSDART00000135437	GO:0000166(nucleotide binding);GO:0001756(somitogenesis);GO:0004672(protein kinase activity);GO:0004674(protein serine/threonine kinase activity);GO:0004707(MAP kinase activity);GO:0005524(ATP binding);GO:0005634(nucleus);GO:0005737(cytoplasm);GO:0006357(regulation of transcription by RNA polymerase II);GO:0006468(protein phosphorylation);GO:0007275(multicellular organism development);GO:0010468(…	04010(MAPK signaling pathway);04068(FoxO signaling pathway);04218(Cellular senescence);04261(Adrenergic signaling in cardiomyocytes);04370(VEGF signaling pathway);04620(Toll-like receptor signaling pathway);04621(NOD-like receptor signaling pathway);04622(RIG-I-like receptor signaling pathway);04625(C-type lectin receptor signaling pathway);04912(GnRH signaling pathway);04914(Progesterone-mediate…	K04441	EC:2.7.11.24	mitogen-activated protein kinase 14a [Source:ZFIN;Acc:ZDB-GENE-010202-2]		14.118	18.9936	9.51044	32.9633	21.8507	11.829	6.89374	8.82274	5.16576	16.1152	10.7367	12.3395
ENSDARG00000000861	scrib	ENSDART00000074212;ENSDART00000164200;ENSDART00000174204;ENSDART00000174212;ENSDART00000173878;ENSDART00000173655;ENSDART00000173814;ENSDART00000173474;ENSDART00000173740;ENSDART00000173688	GO:0000132(establishment of mitotic spindle orientation);GO:0001736(establishment of planar polarity);GO:0001764(neuron migration);GO:0001944(vasculature development);GO:0005515(protein binding);GO:0005737(cytoplasm);GO:0005886(plasma membrane);GO:0005911(cell-cell junction);GO:0005912(adherens junction);GO:0005913(cell-cell adherens junction);GO:0007275(multicellular organism development);GO:000…	04530(Tight junction);04530(Tight junction)	K16175		scribbled planar cell polarity protein [Source:ZFIN;Acc:ZDB-GENE-030616-572]		12.0379	13.9142	7.10344	17.0306	13.0386	15.1835	10.895	13.5275	11.1139	8.58815	15.4165	11.734
ENSDARG00000000887	zgc:56699	ENSDART00000000992;ENSDART00000138156;ENSDART00000138849	GO:0005575(cellular_component);GO:0005575(cellular_component)				zgc:56699 [Source:ZFIN;Acc:ZDB-GENE-040426-2099]		68.2431	138.45	16.2829	241.105	0.128405	0.889815	9.4788	20.102	0.996362	112.138	3.90555	0.689096
ENSDARG00000000906	skap2	ENSDART00000052660;ENSDART00000137344	GO:0005515(protein binding);GO:0005737(cytoplasm);GO:0005886(plasma membrane);GO:0042113(B cell activation);GO:0042113(B cell activation)				src kinase associated phosphoprotein 2 [Source:ZFIN;Acc:ZDB-GENE-030616-438]		7.30786	5.36392	5.48051	6.7778	7.96915	6.0033	7.087	13.0969	3.58514	4.69232	3.96917	2.62153
ENSDARG00000000935	unk	ENSDART00000190278;ENSDART00000131300;ENSDART00000137254	GO:0001764(neuron migration);GO:0005515(protein binding);GO:0005575(cellular_component);GO:0005844(polysome);GO:0046872(metal ion binding);GO:0048667(cell morphogenesis involved in neuron differentiation);GO:1990715(mRNA CDS binding);GO:2000766(negative regulation of cytoplasmic translation);GO:2000766(negative regulation of cytoplasmic translation)		K23048		unk zinc finger [Source:ZFIN;Acc:ZDB-GENE-040426-707]		0.741161	1.10326	0.567201	1.38995	0.521865	0.675525	0.378177	0.856415	0.263475	0.677144	0.502028	0.256974
ENSDARG00000000943	dzip1	ENSDART00000083424;ENSDART00000125912;ENSDART00000049695;ENSDART00000136088;ENSDART00000177226	GO:0003676(nucleic acid binding);GO:0003676(nucleic acid binding)		K16470		DAZ interacting zinc finger protein 1 [Source:ZFIN;Acc:ZDB-GENE-040526-1]		0.519351	0.463849	1.24397	0.303061	1.03301	1.51616	3.89025	7.19348	0.788758	0.107936	0.454043	0.911414
ENSDARG00000000966	ncor2	ENSDART00000051139;ENSDART00000001092;ENSDART00000140618;ENSDART00000133292	GO:0000118(histone deacetylase complex);GO:0000122(negative regulation of transcription by RNA polymerase II);GO:0000790(nuclear chromatin);GO:0001012(RNA polymerase II regulatory region DNA binding);GO:0003677(DNA binding);GO:0003682(chromatin binding);GO:0003714(transcription corepressor activity);GO:0005634(nucleus);GO:0017053(transcriptional repressor complex);GO:0030097(hemopoiesis);GO:00300…	04330(Notch signaling pathway);04330(Notch signaling pathway)	K06065		nuclear receptor corepressor 2 [Source:ZFIN;Acc:ZDB-GENE-030616-81]		8.34823	9.11166	8.68205	8.99484	6.11032	6.65123	6.44893	14.0511	4.373	5.27771	5.05056	4.39269
ENSDARG00000001014	myh9b	ENSDART00000092373;ENSDART00000182438;ENSDART00000137105	GO:0000166(nucleotide binding);GO:0003774(motor activity);GO:0003779(actin binding);GO:0005515(protein binding);GO:0005524(ATP binding);GO:0008360(regulation of cell shape);GO:0016459(myosin complex);GO:0021555(midbrain-hindbrain boundary morphogenesis);GO:0051015(actin filament binding);GO:0070650(actin filament bundle distribution);GO:0070650(actin filament bundle distribution)	04530(Tight junction);04530(Tight junction)	K10352		myosin, heavy chain 9b, non-muscle [Source:ZFIN;Acc:ZDB-GENE-030131-998]		14.2422	26.3916	22.332	13.769	15.0199	20.2586	18.4777	20.5407	11.4059	9.42721	18.2652	19.5438
ENSDARG00000001015	znf384l	ENSDART00000167640;ENSDART00000104891;ENSDART00000141913;ENSDART00000150957	GO:0003676(nucleic acid binding);GO:0003676(nucleic acid binding)				zinc finger protein 384 like [Source:ZFIN;Acc:ZDB-GENE-030616-498]		1.25797	0.96414	1.43302	0.252356	2.93817	3.5067	2.08214	2.39141	2.34543	0.483712	1.53089	1.18867
ENSDARG00000001057	bysl	ENSDART00000001201	GO:0005634(nucleus);GO:0005730(nucleolus);GO:0005737(cytoplasm);GO:0006364(rRNA processing);GO:0030515(snoRNA binding);GO:0030688(preribosome, small subunit precursor)		K14797		bystin-like [Source:ZFIN;Acc:ZDB-GENE-040426-1287]		31.5137	51.9425	27.3467	50.1061	21.2291	21.2953	16.0824	23.3479	22.3222	36.7489	23.2022	15.2808
ENSDARG00000001127	slc17a6a	ENSDART00000003494	GO:0016020(membrane);GO:0016021(integral component of membrane);GO:0055085(transmembrane transport)		K12302		solute carrier family 17 (vesicular glutamate transporter), member 6a [Source:ZFIN;Acc:ZDB-GENE-050105-4]		0	0.018626	0	0	0	0	0	0.03332	0	0	0	0
ENSDARG00000001129	dicer1	ENSDART00000045881;ENSDART00000170429	GO:0000166(nucleotide binding);GO:0003676(nucleic acid binding);GO:0003723(RNA binding);GO:0004386(helicase activity);GO:0004518(nuclease activity);GO:0004519(endonuclease activity);GO:0004525(ribonuclease III activity);GO:0004530(deoxyribonuclease I activity);GO:0005515(protein binding);GO:0005524(ATP binding);GO:0005634(nucleus);GO:0005737(cytoplasm);GO:0006309(apoptotic DNA fragmentation);GO:0…		K11592	EC:3.1.26.-	dicer 1, ribonuclease type III [Source:ZFIN;Acc:ZDB-GENE-030131-3445]		4.5238	5.08086	5.39407	5.86215	3.24967	3.73825	2.74476	4.56724	2.10027	2.52804	2.71927	2.10413
ENSDARG00000001154	rimbp2	ENSDART00000001313;ENSDART00000186879;ENSDART00000188965;ENSDART00000136269	GO:0005515(protein binding);GO:0007274(neuromuscular synaptic transmission);GO:0007274(neuromuscular synaptic transmission)		K17591		RIMS binding protein 2 [Source:ZFIN;Acc:ZDB-GENE-040724-96]		0.141548	0.173486	0.0464127	0.155212	0.0609097	0	0.0376034	0.263497	0	0.0742181	0.0286229	0
ENSDARG00000001162	matr3l1	ENSDART00000172802;ENSDART00000135004;ENSDART00000173345	GO:0003676(nucleic acid binding);GO:0003676(nucleic acid binding)				matrin 3-like 1.1 [Source:ZFIN;Acc:ZDB-GENE-030616-40]		11.0296	10.8785	5.67178	23.3378	7.91885	9.08023	8.62537	13.7351	5.90772	8.92961	9.395	5.24389
ENSDARG00000001169	hsd17b8	ENSDART00000001331;ENSDART00000123934;ENSDART00000151220	GO:0016491(oxidoreductase activity);GO:0055114(oxidation-reduction process);GO:0055114(oxidation-reduction process)	00140(Steroid hormone biosynthesis);00140(Steroid hormone biosynthesis)	K13370	1.1.1.239;EC:1.1.1.62	hydroxysteroid (17-beta) dehydrogenase 8 [Source:ZFIN;Acc:ZDB-GENE-010110-1]		6.05419	18.4813	2.77486	14.3047	2.42174	3.05239	3.29685	4.2368	5.20306	8.59762	3.34249	2.37309
ENSDARG00000001210	arl14ep	ENSDART00000001376	GO:0003676(nucleic acid binding);GO:0003677(DNA binding);GO:0008150(biological_process);GO:0043231(intracellular membrane-bounded organelle)				ADP-ribosylation factor-like 14 effector protein [Source:ZFIN;Acc:ZDB-GENE-060825-216]		22.2369	42.0223	8.3741	55.5733	6.76183	9.58345	5.46905	11.2683	3.04909	32.4746	8.76328	4.61214
ENSDARG00000001220	mycbp2	ENSDART00000039157	GO:0004842(ubiquitin-protein transferase activity);GO:0005085(guanyl-nucleotide exchange factor activity);GO:0005515(protein binding);GO:0005634(nucleus);GO:0005737(cytoplasm);GO:0005856(cytoskeleton);GO:0007411(axon guidance);GO:0008536(Ran GTPase binding);GO:0016198(axon choice point recognition);GO:0016567(protein ubiquitination);GO:0016740(transferase activity);GO:0021952(central nervous syst…		K10693	EC:2.3.2.27	MYC binding protein 2 [Source:ZFIN;Acc:ZDB-GENE-030616-132]		5.96594	7.87619	6.1901	9.51136	7.30175	8.05432	5.74587	7.95078	5.00994	4.6221	7.06389	5.28184
ENSDARG00000001234	map4k2	ENSDART00000009367;ENSDART00000173759	GO:0000165(MAPK cascade);GO:0000166(nucleotide binding);GO:0000185(activation of MAPKKK activity);GO:0004672(protein kinase activity);GO:0004674(protein serine/threonine kinase activity);GO:0005524(ATP binding);GO:0005737(cytoplasm);GO:0006468(protein phosphorylation);GO:0008349(MAP kinase kinase kinase kinase activity);GO:0016301(kinase activity);GO:0016310(phosphorylation);GO:0016740(transferas…	04010(MAPK signaling pathway);04010(MAPK signaling pathway)	K04414	EC:2.7.11.1	mitogen-activated protein kinase kinase kinase kinase 2 [Source:ZFIN;Acc:ZDB-GENE-030616-163]		10.3644	2.06954	2.55785	2.50063	4.7171	6.54458	1.75053	7.4668	2.15599	1.96343	3.72951	3.95482
ENSDARG00000001241	puf60b	ENSDART00000143285;ENSDART00000173852;ENSDART00000173827;ENSDART00000174003;ENSDART00000038487;ENSDART00000173463;ENSDART00000052274;ENSDART00000166448;ENSDART00000185388	GO:0003676(nucleic acid binding);GO:0003677(DNA binding);GO:0003723(RNA binding);GO:0005634(nucleus);GO:0006397(mRNA processing);GO:0006915(apoptotic process);GO:0008380(RNA splicing);GO:0008380(RNA splicing)				poly-U binding splicing factor b [Source:ZFIN;Acc:ZDB-GENE-040625-116]		35.2394	51.0292	18.9325	77.926	19.7552	25.1891	21.6184	28.6937	16.1789	37.4518	24.6811	17.5095
ENSDARG00000001244	srrm1	ENSDART00000149241;ENSDART00000149747;ENSDART00000148856;ENSDART00000149790;ENSDART00000121848;ENSDART00000148483;ENSDART00000150195	GO:0006397(mRNA processing);GO:0006397(mRNA processing)	03013(RNA transport);03015(mRNA surveillance pathway);03015(mRNA surveillance pathway)	K13171		serine/arginine repetitive matrix 1 [Source:ZFIN;Acc:ZDB-GENE-040426-2789]		24.0466	35.5244	24.1238	39.0229	28.5443	23.6136	32.003	31.5462	26.2006	22.0456	35.1602	17.9126
ENSDARG00000001249	pcgf1	ENSDART00000001424;ENSDART00000168074			K11487		polycomb group ring finger 1 [Source:ZFIN;Acc:ZDB-GENE-030616-605]		5.44494	12.278	3.22078	20.3633	1.33424	1.5109	1.64242	2.17922	1.2601	9.90989	2.71543	0.96999
ENSDARG00000001259	gas2a	ENSDART00000034313	GO:0005515(protein binding);GO:0005856(cytoskeleton);GO:0006915(apoptotic process);GO:0008017(microtubule binding)				growth arrest-specific 2a [Source:ZFIN;Acc:ZDB-GENE-091013-1]		0.296884	0.040676	0	0.162844	0.184814	0.121101	0.336067	0.466673	0.115573	0	0	0.496844
ENSDARG00000001303	psmb8a	ENSDART00000104838;ENSDART00000147177	GO:0000502(proteasome complex);GO:0004175(endopeptidase activity);GO:0004298(threonine-type endopeptidase activity);GO:0005634(nucleus);GO:0005737(cytoplasm);GO:0005839(proteasome core complex);GO:0006508(proteolysis);GO:0008233(peptidase activity);GO:0010498(proteasomal protein catabolic process);GO:0010499(proteasomal ubiquitin-independent protein catabolic process);GO:0016787(hydrolase activit…	03050(Proteasome);03050(Proteasome)	K02740	EC:3.4.25.1	proteasome subunit beta 8A [Source:ZFIN;Acc:ZDB-GENE-990415-141]		17.1233	4.11714	20.3886	2.91898	89.8419	35.4209	24.9229	42.0469	14.9898	1.3607	26.8777	42.2955
ENSDARG00000001313	g2e3	ENSDART00000001444;ENSDART00000132811	GO:0004842(ubiquitin-protein transferase activity);GO:0016567(protein ubiquitination);GO:0016740(transferase activity);GO:0046872(metal ion binding);GO:0046872(metal ion binding)		K22371	EC:2.3.2.26	G2/M-phase specific E3 ubiquitin protein ligase [Source:ZFIN;Acc:ZDB-GENE-030616-400]		7.01183	11.94	1.991	19.0282	0.55806	1.11853	3.83872	8.67931	0.296215	9.51614	1.50395	0.554854
ENSDARG00000001354	slc6a22	ENSDART00000191395;ENSDART00000143577	GO:0005328(neurotransmitter:sodium symporter activity);GO:0005332(gamma-aminobutyric acid:sodium symporter activity);GO:0005886(plasma membrane);GO:0006836(neurotransmitter transport);GO:0015293(symporter activity);GO:0015812(gamma-aminobutyric acid transport);GO:0016020(membrane);GO:0016021(integral component of membrane);GO:0042165(neurotransmitter binding);GO:0043005(neuron projection);GO:0055…		K05039		solute carrier family 6 member 22, tandem duplicate 2 [Source:ZFIN;Acc:ZDB-GENE-030616-628]		24.1254	2.06144	1.90469	1.10956	0.632007	0.891361	1.06848	49.0681	1.30973	6.42013	0.956252	0.246121
ENSDARG00000001414	mctp2a	ENSDART00000001102;ENSDART00000189030;ENSDART00000136489	GO:0016020(membrane);GO:0016021(integral component of membrane);GO:0030672(synaptic vesicle membrane);GO:0030672(synaptic vesicle membrane)				multiple C2 domains, transmembrane 2a [Source:ZFIN;Acc:ZDB-GENE-040724-63]		0.667273	1.12791	3.5811	0.134911	3.58372	5.78956	1.34521	1.79413	2.41839	0.2877	6.28313	4.90996
ENSDARG00000001431	actn3b	ENSDART00000189886;ENSDART00000001649	GO:0003779(actin binding);GO:0005509(calcium ion binding);GO:0005515(protein binding);GO:0005575(cellular_component);GO:0005575(cellular_component)		K21073		actinin alpha 3b [Source:ZFIN;Acc:ZDB-GENE-030131-2040]		58.1035	23.1619	257.858	13.8122	488.047	347.873	358.206	50.4811	567.35	31.861	343.825	497.951
ENSDARG00000001437	slc2a1a	ENSDART00000025414	GO:0001885(endothelial cell development);GO:0002040(sprouting angiogenesis);GO:0005215(transporter activity);GO:0005355(glucose transmembrane transporter activity);GO:0008643(carbohydrate transport);GO:0016020(membrane);GO:0016021(integral component of membrane);GO:0022857(transmembrane transporter activity);GO:0043066(negative regulation of apoptotic process);GO:0046323(glucose import);GO:005508…	04920(Adipocytokine signaling pathway)	K07299		solute carrier family 2 (facilitated glucose transporter), member 1a [Source:ZFIN;Acc:ZDB-GENE-030131-3158]		0.05052	0	0.025448	0	0	0.365871	0.177769	0.48315	0.050583	0	0	0
ENSDARG00000001442	inppl1b	ENSDART00000172791;ENSDART00000105745	GO:0005515(protein binding);GO:0016787(hydrolase activity);GO:0046856(phosphatidylinositol dephosphorylation);GO:0046856(phosphatidylinositol dephosphorylation)				inositol polyphosphate phosphatase-like 1b [Source:ZFIN;Acc:ZDB-GENE-030616-75]		2.56074	1.52958	2.37008	2.77985	1.47541	4.71365	3.01935	2.9406	1.72938	1.57315	2.314	1.96276
ENSDARG00000001447	mier1b	ENSDART00000142545	GO:0000122(negative regulation of transcription by RNA polymerase II);GO:0001103(RNA polymerase II repressing transcription factor binding);GO:0003677(DNA binding);GO:0003714(transcription corepressor activity);GO:0005634(nucleus);GO:0005654(nucleoplasm);GO:0006355(regulation of transcription, DNA-templated);GO:0016575(histone deacetylation);GO:0017053(transcriptional repressor complex);GO:004282…				mesoderm induction early response 1b, transcriptional regulator [Source:ZFIN;Acc:ZDB-GENE-070705-170]		3.6722	5.70645	1.63896	5.92758	1.68861	2.51907	3.31516	7.27183	1.44079	2.94892	2.09927	1.28263
ENSDARG00000001452	adam8a	ENSDART00000001678;ENSDART00000139572	GO:0002020(protease binding);GO:0004222(metalloendopeptidase activity);GO:0006508(proteolysis);GO:0007229(integrin-mediated signaling pathway);GO:0008237(metallopeptidase activity);GO:0016020(membrane);GO:0016021(integral component of membrane);GO:0016021(integral component of membrane)		K06540	EC:3.4.24.-	ADAM metallopeptidase domain 8a [Source:ZFIN;Acc:ZDB-GENE-030616-622]		4.31132	9.85128	7.62939	5.39121	3.4913	1.28403	1.09058	2.07209	0.850184	4.43198	0.667728	0.564411
ENSDARG00000001463	tdh2	ENSDART00000001691;ENSDART00000158516;ENSDART00000162536	GO:0003824(catalytic activity);GO:0005575(cellular_component);GO:0050662(coenzyme binding);GO:0050662(coenzyme binding)				L-threonine dehydrogenase 2 [Source:ZFIN;Acc:ZDB-GENE-070620-14]		0.977111	8.68794	59.5717	0.090489	16.6104	1.87953	3.13818	0.754188	4.45344	0.123028	5.36854	1.02437
ENSDARG00000001470	mhc1zea	ENSDART00000101143;ENSDART00000159925;ENSDART00000176803;ENSDART00000048445	GO:0005615(extracellular space);GO:0005886(plasma membrane);GO:0006955(immune response);GO:0009897(external side of plasma membrane);GO:0016020(membrane);GO:0016021(integral component of membrane);GO:0016021(integral component of membrane)				major histocompatibility complex class I ZEA [Source:ZFIN;Acc:ZDB-GENE-070705-176]		5.87706	6.53188	3.33118	7.39032	4.56318	3.16191	7.103	7.33016	1.85061	4.48254	9.47861	29.5369
ENSDARG00000001498	skap1	ENSDART00000153030	GO:0005515(protein binding);GO:0005737(cytoplasm);GO:0005886(plasma membrane)				src kinase associated phosphoprotein 1 [Source:ZFIN;Acc:ZDB-GENE-090721-1]		1.06023	0.32329	0.442114	0.422577	1.13045	0.969324	1.09286	1.50523	0.72732	0.151487	0.598497	1.03567
ENSDARG00000001549	sp3a	ENSDART00000123342;ENSDART00000001795;ENSDART00000177563	GO:0000981(DNA-binding transcription factor activity, RNA polymerase II-specific);GO:0000987(proximal promoter sequence-specific DNA binding);GO:0003676(nucleic acid binding);GO:0003700(DNA-binding transcription factor activity);GO:0005634(nucleus);GO:0006355(regulation of transcription, DNA-templated);GO:0006357(regulation of transcription by RNA polymerase II);GO:0006357(regulation of transcrip…		K09193		sp3a transcription factor [Source:ZFIN;Acc:ZDB-GENE-070410-111]		2.16174	3.2526	0.910928	2.65951	0.478476	0.457807	0.202606	0.792398	0.271693	0.975042	0.380017	0.304903
ENSDARG00000001557	tomm34	ENSDART00000001803;ENSDART00000191243;ENSDART00000139105;ENSDART00000147754;ENSDART00000133554	GO:0005515(protein binding);GO:0005515(protein binding)		K17766		translocase of outer mitochondrial membrane 34 [Source:ZFIN;Acc:ZDB-GENE-030131-2081]		6.70116	8.62703	20.0569	8.01777	8.19376	8.1516	4.95724	6.03933	3.07267	3.35621	11.0655	8.04857
ENSDARG00000001558	kifc1	ENSDART00000158758;ENSDART00000160482;ENSDART00000193566	GO:0000166(nucleotide binding);GO:0003774(motor activity);GO:0003777(microtubule motor activity);GO:0005524(ATP binding);GO:0005634(nucleus);GO:0005871(kinesin complex);GO:0005874(microtubule);GO:0007018(microtubule-based movement);GO:0008017(microtubule binding);GO:0016887(ATPase activity);GO:0072686(mitotic spindle);GO:0090307(mitotic spindle assembly);GO:0090307(mitotic spindle assembly)		K10405		kinesin family member C1 [Source:ZFIN;Acc:ZDB-GENE-000208-21]		14.6666	27.417	6.57878	49.3408	1.52788	5.43805	7.25673	16.3737	1.92373	17.8485	5.5979	3.12143
ENSDARG00000001559	csmd2	ENSDART00000132471;ENSDART00000151348	GO:0016020(membrane);GO:0016021(integral component of membrane);GO:0016021(integral component of membrane)		K17495		CUB and Sushi multiple domains 2 [Source:ZFIN;Acc:ZDB-GENE-030616-39]		0.0479778	0.0502672	0	0.177915	0	0.0162517	0.0639318	0.149694	0.00404916	0.0504362	0	0.0150068
ENSDARG00000001572	prf1	ENSDART00000145003;ENSDART00000001821	GO:0005509(calcium ion binding);GO:0019835(cytolysis);GO:0019835(cytolysis)				perforin 1.3 [Source:ZFIN;Acc:ZDB-GENE-060503-461]		0.036363	0	0	0	0.066697	0.03684	0	0.059446	0.193063	0	0	0.065192
ENSDARG00000001578	echs1	ENSDART00000001830	GO:0003824(catalytic activity);GO:0004300(enoyl-CoA hydratase activity);GO:0005739(mitochondrion);GO:0006635(fatty acid beta-oxidation)	00062(Fatty acid elongation);00071(Fatty acid degradation);00280(Valine, leucine and isoleucine degradation);00310(Lysine degradation);00380(Tryptophan metabolism);00410(beta-Alanine metabolism);00640(Propanoate metabolism);00650(Butanoate metabolism)	K07511	EC:4.2.1.17	enoyl CoA hydratase, short chain, 1, mitochondrial [Source:ZFIN;Acc:ZDB-GENE-030616-617]		38.276	21.7049	32.3916	13.2497	52.4226	54.1615	49.0831	63.1582	40.6923	21.3972	46.9228	46.883		30.7909	39.9446	50.9779	38.401
ENSDARG00000001621	nfyal	ENSDART00000135973	GO:0003677(DNA binding);GO:0003700(DNA-binding transcription factor activity);GO:0006355(regulation of transcription, DNA-templated);GO:0016602(CCAAT-binding factor complex)				nuclear transcription factor Y, alpha, like [Source:ZFIN;Acc:ZDB-GENE-040718-491]		2.18717	6.17588	2.35122	6.24508	0.977655	1.9655	0.82887	1.29762	0.644149	4.04739	1.62961	1.00317
ENSDARG00000001634	kirrel1a	ENSDART00000142924	GO:0016020(membrane);GO:0016021(integral component of membrane);GO:0042802(identical protein binding)				kirre like nephrin family adhesion molecule 1a [Source:ZFIN;Acc:ZDB-GENE-040426-2126]		0.550494	0.304813	0.463633	0.384915	0.500106	1.44847	1.06609	1.05021	0.827108	0.308938	0.77401	1.09327
ENSDARG00000001656	psmb13a	ENSDART00000001930;ENSDART00000134850	GO:0000502(proteasome complex);GO:0004175(endopeptidase activity);GO:0004298(threonine-type endopeptidase activity);GO:0005634(nucleus);GO:0005737(cytoplasm);GO:0005839(proteasome core complex);GO:0006508(proteolysis);GO:0008233(peptidase activity);GO:0010498(proteasomal protein catabolic process);GO:0010499(proteasomal ubiquitin-independent protein catabolic process);GO:0016787(hydrolase activit…	03050(Proteasome);03050(Proteasome)	K02739	EC:3.4.25.1	proteasome subunit beta 13a [Source:ZFIN;Acc:ZDB-GENE-001208-2]		7.74675	0.953071	11.229	1.57192	53.3111	22.2141	15.5945	35.719	7.9987	0.208188	16.9779	20.9294
ENSDARG00000001676	gpm6bb	ENSDART00000085693;ENSDART00000137214	GO:0005886(plasma membrane);GO:0016020(membrane);GO:0016021(integral component of membrane);GO:0031175(neuron projection development);GO:0031175(neuron projection development)				glycoprotein M6Bb [Source:ZFIN;Acc:ZDB-GENE-030710-10]		1.97592	2.44799	2.65357	3.00231	2.78931	4.38116	2.28669	2.18609	2.06243	1.63772	1.33972	2.95726
ENSDARG00000001686	uckl1a	ENSDART00000030885	GO:0000166(nucleotide binding);GO:0004849(uridine kinase activity);GO:0005524(ATP binding);GO:0009116(nucleoside metabolic process);GO:0016301(kinase activity);GO:0016310(phosphorylation);GO:0016740(transferase activity);GO:0044206(UMP salvage);GO:0044211(CTP salvage)				uridine-cytidine kinase 1-like 1a [Source:ZFIN;Acc:ZDB-GENE-040724-238]		0.118719	0.23334	0.069275	0.22901	0.097613	0.189565	0.179407	0.459582	0.063144	0.14809	0.103395	0.119121
ENSDARG00000001710	flot1a	ENSDART00000139122		04910(Insulin signaling pathway)	K07192		flotillin 1a [Source:ZFIN;Acc:ZDB-GENE-020430-1]		0.617292	0.576983	0.532171	0.290279	0.636524	0.653104	1.09306	1.52978	0.86981	0.816306	0.145675	0.550686
ENSDARG00000001712	si:ch211-247n2	ENSDART00000160570;ENSDART00000052698	GO:0005513(detection of calcium ion);GO:0006813(potassium ion transport);GO:0008076(voltage-gated potassium channel complex);GO:0015269(calcium-activated potassium channel activity);GO:0015459(potassium channel regulator activity);GO:0016020(membrane);GO:0016021(integral component of membrane);GO:0071805(potassium ion transmembrane transport);GO:0071805(potassium ion transmembrane transport)	04270(Vascular smooth muscle contraction);04270(Vascular smooth muscle contraction)	K04938		si:ch211-247n2.1 [Source:ZFIN;Acc:ZDB-GENE-141216-101]		0.208551	0.0772778	0.391847	0	0.548486	1.85183	0.580363	0.150047	1.31326	0.153205	0.826131	1.41611
ENSDARG00000001721	oc90	ENSDART00000098303;ENSDART00000139945;ENSDART00000144317	GO:0004623(phospholipase A2 activity);GO:0005198(structural molecule activity);GO:0005509(calcium ion binding);GO:0005576(extracellular region);GO:0006644(phospholipid metabolic process);GO:0016042(lipid catabolic process);GO:0048840(otolith development);GO:0050482(arachidonic acid secretion);GO:0050482(arachidonic acid secretion)				otoconin 90 [Source:ZFIN;Acc:ZDB-GENE-070912-300]		0.363177	0.728059	0.0697756	1.21574	0	0.0684986	2.86451	3.11042	0.0820166	0.446616	0.0645809	0.0174441
ENSDARG00000001729	strn3	ENSDART00000126967	GO:0005515(protein binding);GO:0005516(calmodulin binding);GO:0030425(dendrite);GO:0044877(protein-containing complex binding);GO:0051721(protein phosphatase 2A binding);GO:0070016(armadillo repeat domain binding)		K17608		striatin, calmodulin binding protein 3 [Source:ZFIN;Acc:ZDB-GENE-030616-405]		9.93142	17.7284	20.1785	12.758	25.6335	18.5135	10.6172	8.7057	11.8527	7.66101	17.8909	16.7656
ENSDARG00000001733	gulp1a	ENSDART00000192224;ENSDART00000191186;ENSDART00000138133;ENSDART00000002027	GO:0005515(protein binding);GO:0005737(cytoplasm);GO:0006909(phagocytosis);GO:0006915(apoptotic process);GO:0006915(apoptotic process)		K23285		GULP PTB domain containing engulfment adaptor 1a [Source:ZFIN;Acc:ZDB-GENE-030616-21]		1.64239	1.40773	2.54044	1.56158	2.53171	2.87373	2.35942	1.71124	1.66758	0.915283	1.34654	2.99832
ENSDARG00000001734	fkbp8	ENSDART00000002029	GO:0000413(protein peptidyl-prolyl isomerization);GO:0003755(peptidyl-prolyl cis-trans isomerase activity);GO:0005515(protein binding);GO:0016020(membrane);GO:0016021(integral component of membrane);GO:0016853(isomerase activity)		K09574	EC:5.2.1.8	FKBP prolyl isomerase 8 [Source:ZFIN;Acc:ZDB-GENE-040426-1849]		12.4987	14.0383	5.37174	22.2769	5.05767	6.62699	9.07333	14.6211	3.26766	10.5446	6.39213	5.5599
ENSDARG00000001754	noc2l	ENSDART00000091662;ENSDART00000141853	GO:0000122(negative regulation of transcription by RNA polymerase II);GO:0003714(transcription corepressor activity);GO:0005654(nucleoplasm);GO:0005730(nucleolus);GO:0030690(Noc1p-Noc2p complex);GO:0030691(Noc2p-Noc3p complex);GO:0035067(negative regulation of histone acetylation);GO:0042273(ribosomal large subunit biogenesis);GO:0042393(histone binding);GO:0070491(repressing transcription factor…		K14833		NOC2-like nucleolar associated transcriptional repressor [Source:ZFIN;Acc:ZDB-GENE-000607-75]		12.3261	26.4304	8.40422	37.8705	5.32154	4.66334	4.34818	4.65886	3.68207	14.4232	4.04305	4.12685
ENSDARG00000001760	tnxba	ENSDART00000014439;ENSDART00000185748	GO:0005515(protein binding);GO:0030198(extracellular matrix organization);GO:0030199(collagen fibril organization);GO:0062023(collagen-containing extracellular matrix);GO:0062023(collagen-containing extracellular matrix)				tenascin XBa [Source:ZFIN;Acc:ZDB-GENE-070103-5]		0.0635859	0	0.0221017	0.0509468	0	0	0.0751614	0.0917582	0.0200007	0.00742141	0.0586077	0.067955
ENSDARG00000001767	slc29a2	ENSDART00000131646;ENSDART00000148161	GO:0005337(nucleoside transmembrane transporter activity);GO:0005887(integral component of plasma membrane);GO:0015853(adenine transport);GO:0015854(guanine transport);GO:0015858(nucleoside transport);GO:0015862(uridine transport);GO:0016021(integral component of membrane);GO:0016323(basolateral plasma membrane);GO:0035344(hypoxanthine transport);GO:0035364(thymine transport);GO:1901642(nucleosid…		K15014		solute carrier family 29 (equilibrative nucleoside transporter), member 2 [Source:ZFIN;Acc:ZDB-GENE-050220-15]		1.65463	8.81817	1.63869	19.0353	0.441322	3.52072	1.06409	2.16925	0.47589	2.84244	2.67027	1.97075
ENSDARG00000001769	ptpra	ENSDART00000026903;ENSDART00000101956	GO:0004721(phosphoprotein phosphatase activity);GO:0004725(protein tyrosine phosphatase activity);GO:0006470(protein dephosphorylation);GO:0016020(membrane);GO:0016021(integral component of membrane);GO:0016311(dephosphorylation);GO:0016787(hydrolase activity);GO:0016791(phosphatase activity);GO:0035335(peptidyl-tyrosine dephosphorylation);GO:0045859(regulation of protein kinase activity);GO:0060…		K18032	EC:3.1.3.48	protein tyrosine phosphatase, receptor type, A [Source:ZFIN;Acc:ZDB-GENE-020107-1]		2.17619	2.58096	2.62962	2.25547	3.74218	3.21912	1.70143	2.33185	2.02792	1.36617	2.80799	2.86516
ENSDARG00000001771	otol1a	ENSDART00000132859	GO:0005201(extracellular matrix structural constituent);GO:0005509(calcium ion binding);GO:0005515(protein binding);GO:0005576(extracellular region);GO:0005581(collagen trimer);GO:0005615(extracellular space);GO:0030198(extracellular matrix organization);GO:0031012(extracellular matrix);GO:0045299(otolith mineralization);GO:0046872(metal ion binding);GO:0048840(otolith development);GO:0051260(pro…				otolin 1a [Source:ZFIN;Acc:ZDB-GENE-050707-1]		0	0.049967	0.140054	0	0.186816	0	0.03651	0	0.103465	0.09905	0.118615	0
ENSDARG00000001776	stim2b	ENSDART00000012089	GO:0002115(store-operated calcium entry);GO:0005246(calcium channel regulator activity);GO:0005509(calcium ion binding);GO:0005515(protein binding);GO:0005783(endoplasmic reticulum);GO:0005886(plasma membrane);GO:0006874(cellular calcium ion homeostasis);GO:0032237(activation of store-operated calcium channel activity)	04020(Calcium signaling pathway)	K18196		stromal interaction molecule 2b [Source:ZFIN;Acc:ZDB-GENE-120404-3]		1.20616	2.89676	1.8934	1.32382	0.460233	0.922537	0.216987	0.269131	0.214058	0.758654	0.845172	0.306732
ENSDARG00000001777	nup155	ENSDART00000137285;ENSDART00000010626	GO:0000972(transcription-dependent tethering of RNA polymerase II gene DNA at nuclear periphery);GO:0005515(protein binding);GO:0005643(nuclear pore);GO:0006606(protein import into nucleus);GO:0006913(nucleocytoplasmic transport);GO:0017056(structural constituent of nuclear pore);GO:0036228(protein localization to nuclear inner membrane);GO:0044611(nuclear pore inner ring);GO:0044611(nuclear pore…	03013(RNA transport);03013(RNA transport)	K14312		nucleoporin 155 [Source:ZFIN;Acc:ZDB-GENE-040426-711]		16.1238	26.1946	8.27959	35.981	5.17834	6.49424	5.49346	9.91181	3.52717	20.7093	5.36268	4.75387
ENSDARG00000001781	tspan11	ENSDART00000193598;ENSDART00000138661	GO:0005887(integral component of plasma membrane);GO:0007166(cell surface receptor signaling pathway);GO:0016020(membrane);GO:0016021(integral component of membrane);GO:0016021(integral component of membrane)		K17352		tetraspanin 11 [Source:ZFIN;Acc:ZDB-GENE-041210-93]		0.327163	0.553371	0.552217	0.0306449	0.633353	0.596718	0.673389	0.281984	0.371733	0.11933	0.380367	0.564998
ENSDARG00000001782	prkacba	ENSDART00000158112;ENSDART00000011183	GO:0000166(nucleotide binding);GO:0004672(protein kinase activity);GO:0004674(protein serine/threonine kinase activity);GO:0005524(ATP binding);GO:0005575(cellular_component);GO:0006468(protein phosphorylation);GO:0016301(kinase activity);GO:0016310(phosphorylation);GO:0016740(transferase activity);GO:0016740(transferase activity)	04010(MAPK signaling pathway);04020(Calcium signaling pathway);04114(Oocyte meiosis);04140(Autophagy - animal);04261(Adrenergic signaling in cardiomyocytes);04270(Vascular smooth muscle contraction);04310(Wnt signaling pathway);04340(Hedgehog signaling pathway);04371(Apelin signaling pathway);04530(Tight junction);04540(Gap junction);04910(Insulin signaling pathway);04912(GnRH signaling pathway);…	K04345	EC:2.7.11.11	protein kinase, cAMP-dependent, catalytic, beta a [Source:ZFIN;Acc:ZDB-GENE-040426-1351]		0.949787	0.559297	0.872393	0.0927217	1.50765	2.326	1.22714	1.81071	1.28323	0.343252	0.741751	1.80695
ENSDARG00000001785	irx2a	ENSDART00000183394;ENSDART00000016303;ENSDART00000148452;ENSDART00000148602	GO:0003677(DNA binding);GO:0005634(nucleus);GO:0006355(regulation of transcription, DNA-templated);GO:0043565(sequence-specific DNA binding);GO:0060042(retina morphogenesis in camera-type eye);GO:0060042(retina morphogenesis in camera-type eye)				iroquois homeobox 2a [Source:ZFIN;Acc:ZDB-GENE-040426-1446]		0.305569	0.132264	0.488692	0.106513	1.32101	1.61133	0.644622	0.37179	1.10568	0.153853	1.8336	1.17353
ENSDARG00000001788	atp5po	ENSDART00000005879;ENSDART00000142453;ENSDART00000141849	GO:0015986(ATP synthesis coupled proton transport);GO:0046933(proton-transporting ATP synthase activity, rotational mechanism);GO:0099132(ATP hydrolysis coupled cation transmembrane transport);GO:0099132(ATP hydrolysis coupled cation transmembrane transport)	00190(Oxidative phosphorylation);00190(Oxidative phosphorylation)	K02137		ATP synthase peripheral stalk subunit OSCP [Source:ZFIN;Acc:ZDB-GENE-050522-147]		155.82	112.033	231.683	102.71	346.917	308.119	302.988	153.133	376.83	80.9455	321.745	310.552
ENSDARG00000001803	kcnh6a	ENSDART00000134201;ENSDART00000090809	GO:0005216(ion channel activity);GO:0005244(voltage-gated ion channel activity);GO:0005249(voltage-gated potassium channel activity);GO:0005267(potassium channel activity);GO:0005887(integral component of plasma membrane);GO:0006811(ion transport);GO:0006813(potassium ion transport);GO:0008016(regulation of heart contraction);GO:0016020(membrane);GO:0016021(integral component of membrane);GO:0034…		K04909		potassium voltage-gated channel, subfamily H (eag-related), member 6a [Source:ZFIN;Acc:ZDB-GENE-040702-5]		0.958681	1.62721	0.304872	0.241217	4.53748	0.532865	3.22007	5.70763	0.777658	0.140888	0.318139	0.735938
ENSDARG00000001804	zgc:112148	ENSDART00000183087;ENSDART00000183146;ENSDART00000189908;ENSDART00000014103	GO:0003674(molecular_function);GO:0009306(protein secretion);GO:0016020(membrane);GO:0016021(integral component of membrane);GO:0016192(vesicle-mediated transport);GO:0030173(integral component of Golgi membrane);GO:0030173(integral component of Golgi membrane)				zgc:112148 [Source:ZFIN;Acc:ZDB-GENE-050417-235]		2.39413	8.21176	5.07766	5.88877	3.3458	2.84281	2.46559	5.09566	1.2676	3.77165	5.3837	1.30411
ENSDARG00000001807	tnfrsf21	ENSDART00000037855	GO:0002040(sprouting angiogenesis);GO:0002250(adaptive immune response);GO:0005515(protein binding);GO:0005887(integral component of plasma membrane);GO:0006959(humoral immune response);GO:0007165(signal transduction);GO:0014045(establishment of endothelial blood-brain barrier);GO:0016020(membrane);GO:0016021(integral component of membrane);GO:0030889(negative regulation of B cell proliferation);…	04060(Cytokine-cytokine receptor interaction)	K05157		tumor necrosis factor receptor superfamily, member 21 [Source:ZFIN;Acc:ZDB-GENE-030131-5971]		0.943794	1.76803	3.18411	0.206522	9.31126	3.84505	3.46259	2.01621	2.60531	0.22991	3.64543	3.44977
ENSDARG00000001817	zmp:0000000521	ENSDART00000016143	GO:0007276(gamete generation);GO:0016020(membrane);GO:0016021(integral component of membrane)				zmp:0000000521 [Source:ZFIN;Acc:ZDB-GENE-130530-524]		1.60687	2.70703	2.07181	3.17836	0.452712	0.252431	1.28183	0.691467	0.204319	1.77174	0.275447	0.640514
ENSDARG00000001818	c3b	ENSDART00000108737	GO:0004866(endopeptidase inhibitor activity);GO:0005515(protein binding);GO:0005576(extracellular region);GO:0005615(extracellular space);GO:0006956(complement activation);GO:0010951(negative regulation of endopeptidase activity)				complement component c3b, tandem duplicate 2 [Source:ZFIN;Acc:ZDB-GENE-030131-3063]		63.8264	11.088	0.191269	1.6269	0.162641	0.259421	1.23051	61.3502	0.098593	17.5263	0.150432	0.216749
ENSDARG00000001825	cfap43	ENSDART00000147713	GO:0005515(protein binding)				cilia and flagella associated protein 43 [Source:ZFIN;Acc:ZDB-GENE-080815-3]		0.119746	0.343537	0.746834	0.091097	0.392298	0.286492	5.30383	12.8769	0.347753	0.363412	0.244181	0.267406
ENSDARG00000001829	zgc:112982	ENSDART00000024606;ENSDART00000111096;ENSDART00000160578;ENSDART00000146736;ENSDART00000144664	GO:0003674(molecular_function);GO:0005575(cellular_component);GO:0005575(cellular_component)				zgc:112982 [Source:ZFIN;Acc:ZDB-GENE-050306-55]		15.1201	17.2429	13.6975	32.4469	13.0761	16.8792	12.3238	16.6823	10.9644	11.6174	18.4888	8.02024
ENSDARG00000001835	nalcn	ENSDART00000135022;ENSDART00000048469;ENSDART00000142289	GO:0005216(ion channel activity);GO:0005261(cation channel activity);GO:0006811(ion transport);GO:0016020(membrane);GO:0016021(integral component of membrane);GO:0034220(ion transmembrane transport);GO:0055085(transmembrane transport);GO:0098655(cation transmembrane transport);GO:0098655(cation transmembrane transport)		K21863		sodium leak channel, non-selective [Source:ZFIN;Acc:ZDB-GENE-050410-12]		0.0880609	0.161678	0.126516	0.150543	0.067495	0.0997868	0.698933	1.22483	0.0838912	0.0816384	0.0303843	0.0410991
ENSDARG00000001857	aff4	ENSDART00000151350;ENSDART00000151512;ENSDART00000151748	GO:0003690(double-stranded DNA binding);GO:0003700(DNA-binding transcription factor activity);GO:0005634(nucleus);GO:0006355(regulation of transcription, DNA-templated);GO:0008023(transcription elongation factor complex);GO:0032783(ELL-EAF complex);GO:0032783(ELL-EAF complex)		K15185		AF4/FMR2 family, member 4 [Source:ZFIN;Acc:ZDB-GENE-100910-5]		4.80902	8.05364	3.89921	9.06613	2.08219	2.99367	2.37144	5.4762	1.4417	4.21906	1.86451	0.85685
ENSDARG00000001859	dbx1b	ENSDART00000015681	GO:0003677(DNA binding);GO:0005634(nucleus);GO:0006355(regulation of transcription, DNA-templated);GO:0043565(sequence-specific DNA binding)				developing brain homeobox 1b [Source:ZFIN;Acc:ZDB-GENE-000128-11]		0.03231	0.310134	0	0.207716	0.034503	0.047887	0.041914	0.136003	0.039771	0	0	0
ENSDARG00000001870	atp1a1a	ENSDART00000048828;ENSDART00000141426;ENSDART00000123205	GO:0000166(nucleotide binding);GO:0005391(sodium:potassium-exchanging ATPase activity);GO:0005524(ATP binding);GO:0005623(cell);GO:0006811(ion transport);GO:0006813(potassium ion transport);GO:0006883(cellular sodium ion homeostasis);GO:0008556(potassium-transporting ATPase activity);GO:0010248(establishment or maintenance of transmembrane electrochemical gradient);GO:0015991(ATP hydrolysis coupl…	04260(Cardiac muscle contraction);04261(Adrenergic signaling in cardiomyocytes);04261(Adrenergic signaling in cardiomyocytes)	K01539	EC:7.2.2.13	ATPase Na+/K+ transporting subunit alpha 1a, tandem duplicate 4 [Source:ZFIN;Acc:ZDB-GENE-001212-4]		18.1599	9.37777	41.5837	2.67644	0.187115	29.5843	38.004	82.864	13.8373	7.48165	24.1656	0.273149
ENSDARG00000001873	phgdh	ENSDART00000012938	GO:0004617(phosphoglycerate dehydrogenase activity);GO:0005575(cellular_component);GO:0006520(cellular amino acid metabolic process);GO:0006564(L-serine biosynthetic process);GO:0008652(cellular amino acid biosynthetic process);GO:0016491(oxidoreductase activity);GO:0016616(oxidoreductase activity, acting on the CH-OH group of donors, NAD or NADP as acceptor);GO:0051287(NAD binding);GO:0055114(ox…	00260(Glycine, serine and threonine metabolism)	K00058	1.1.1.399;EC:1.1.1.95	phosphoglycerate dehydrogenase [Source:ZFIN;Acc:ZDB-GENE-030131-647]		13.9773	34.5644	8.57059	38.0946	8.39451	9.94682	2.6496	4.4346	1.38435	24.7439	11.7009	20.4436
ENSDARG00000001879	nav2b	ENSDART00000143666;ENSDART00000137935	GO:0005515(protein binding);GO:0005524(ATP binding);GO:0005575(cellular_component);GO:0007399(nervous system development);GO:0022008(neurogenesis);GO:0022008(neurogenesis)				neuron navigator 2b [Source:ZFIN;Acc:ZDB-GENE-061207-13]		4.50629	3.05572	3.05042	1.46433	4.54425	4.8881	2.90544	7.23954	2.6136	1.91769	4.87386	2.78763
ENSDARG00000001880	stx3a	ENSDART00000073707;ENSDART00000169942;ENSDART00000161435	GO:0000149(SNARE binding);GO:0005484(SNAP receptor activity);GO:0005886(plasma membrane);GO:0006886(intracellular protein transport);GO:0006887(exocytosis);GO:0006906(vesicle fusion);GO:0008021(synaptic vesicle);GO:0012505(endomembrane system);GO:0016020(membrane);GO:0016021(integral component of membrane);GO:0016081(synaptic vesicle docking);GO:0016192(vesicle-mediated transport);GO:0031201(SNAR…	04130(SNARE interactions in vesicular transport);04130(SNARE interactions in vesicular transport)	K08486		syntaxin 3A [Source:ZFIN;Acc:ZDB-GENE-040426-1489]		3.6417	5.19663	2.54074	9.96254	2.09229	2.89323	3.41689	4.20165	1.49351	4.22308	3.08013	1.46256
ENSDARG00000001882	kbtbd12	ENSDART00000188187;ENSDART00000035101	GO:0005515(protein binding);GO:0005515(protein binding)		K21912		kelch repeat and BTB (POZ) domain containing 12 [Source:ZFIN;Acc:ZDB-GENE-050904-1]		3.83109	6.08516	40.5088	0.584928	37.6917	25.5945	20.0208	4.85259	24.6712	2.33315	26.9715	19.2683
ENSDARG00000001888	ppm1ba	ENSDART00000144755;ENSDART00000190925;ENSDART00000126725	GO:0000287(magnesium ion binding);GO:0003824(catalytic activity);GO:0004721(phosphoprotein phosphatase activity);GO:0004722(protein serine/threonine phosphatase activity);GO:0004724(magnesium-dependent protein serine/threonine phosphatase activity);GO:0005634(nucleus);GO:0005829(cytosol);GO:0006470(protein dephosphorylation);GO:0016787(hydrolase activity);GO:0030145(manganese ion binding);GO:0043…	04010(MAPK signaling pathway);04010(MAPK signaling pathway)	K04461	EC:3.1.3.16	protein phosphatase, Mg2+/Mn2+ dependent, 1Ba [Source:ZFIN;Acc:ZDB-GENE-991102-16]		7.28665	8.24595	5.24291	14.1438	3.6696	4.03261	9.25927	20.8411	1.99503	7.08044	3.55215	3.18103
ENSDARG00000001889	tuba1a	ENSDART00000009277	GO:0000166(nucleotide binding);GO:0000226(microtubule cytoskeleton organization);GO:0000278(mitotic cell cycle);GO:0003924(GTPase activity);GO:0005200(structural constituent of cytoskeleton);GO:0005525(GTP binding);GO:0005737(cytoplasm);GO:0005856(cytoskeleton);GO:0005874(microtubule);GO:0007017(microtubule-based process);GO:0021634(optic nerve formation);GO:0043066(negative regulation of apoptot…	04145(Phagosome);04210(Apoptosis);04530(Tight junction);04540(Gap junction)	K07374		tubulin, alpha 1a [Source:ZFIN;Acc:ZDB-GENE-090507-4]		4.26243	3.25034	5.65566	8.14286	6.60544	7.85267	10.1935	9.72169	5.94212	2.9422	8.80051	13.0026
ENSDARG00000001890	stt3b	ENSDART00000102525;ENSDART00000191330	GO:0004576(oligosaccharyl transferase activity);GO:0004579(dolichyl-diphosphooligosaccharide-protein glycotransferase activity);GO:0006486(protein glycosylation);GO:0008250(oligosaccharyltransferase complex);GO:0016020(membrane);GO:0016021(integral component of membrane);GO:0018279(protein N-linked glycosylation via asparagine);GO:0043687(post-translational protein modification);GO:0043687(post-t…	00510(N-Glycan biosynthesis);04141(Protein processing in endoplasmic reticulum);04141(Protein processing in endoplasmic reticulum)	K07151	EC:2.4.99.18	STT3B, subunit of the oligosaccharyltransferase complex (catalytic) [Source:ZFIN;Acc:ZDB-GENE-030131-2638]		19.4544	25.7583	8.83565	39.0809	6.63584	7.94722	6.42923	9.48501	4.32835	20.0323	10.8465	9.11241
ENSDARG00000001891	syt14b	ENSDART00000136079;ENSDART00000175069	GO:0016020(membrane);GO:0016021(integral component of membrane);GO:0016021(integral component of membrane)		K19328		synaptotagmin XIVb [Source:ZFIN;Acc:ZDB-GENE-041014-36]		0.213165	0.535746	0.599113	0.234127	0.710136	1.04063	0.434355	0.451427	0.576716	0.272586	1.06781	0.208941
ENSDARG00000001897	man2b1	ENSDART00000004780;ENSDART00000141062	GO:0003824(catalytic activity);GO:0004559(alpha-mannosidase activity);GO:0005774(vacuolar membrane);GO:0005975(carbohydrate metabolic process);GO:0006013(mannose metabolic process);GO:0006517(protein deglycosylation);GO:0008152(metabolic process);GO:0016787(hydrolase activity);GO:0016798(hydrolase activity, acting on glycosyl bonds);GO:0030246(carbohydrate binding);GO:0046872(metal ion binding);G…	00511(Other glycan degradation);04142(Lysosome);04142(Lysosome)	K12311	EC:3.2.1.24	mannosidase, alpha, class 2B, member 1 [Source:ZFIN;Acc:ZDB-GENE-050327-52]		21.4975	20.4836	11.3899	39.1996	14.525	18.8054	17.1987	23.1363	5.48971	20.8027	15.0203	7.36838
ENSDARG00000001898	manea	ENSDART00000132571;ENSDART00000142972;ENSDART00000189936	GO:0004559(alpha-mannosidase activity);GO:0005575(cellular_component);GO:0005794(Golgi apparatus);GO:0008150(biological_process);GO:0016798(hydrolase activity, acting on glycosyl bonds);GO:0016798(hydrolase activity, acting on glycosyl bonds)		K15538	EC:3.2.1.130	mannosidase, endo-alpha [Source:ZFIN;Acc:ZDB-GENE-040912-87]		9.10761	1.94255	3.00272	1.67822	3.44785	2.94386	2.34223	5.9687	1.82243	2.33414	2.95087	2.06817
ENSDARG00000001906	si:dkey-247m21	ENSDART00000025860	GO:0004930(G protein-coupled receptor activity);GO:0004993(G protein-coupled serotonin receptor activity);GO:0005887(integral component of plasma membrane);GO:0007165(signal transduction);GO:0007186(G protein-coupled receptor signaling pathway);GO:0007187(G protein-coupled receptor signaling pathway, coupled to cyclic nucleotide second messenger);GO:0007268(chemical synaptic transmission);GO:0016…				si:dkey-247m21.3 [Source:ZFIN;Acc:ZDB-GENE-091204-249]		0.0339663	0.0135205	0.0221838	0	0.0994827	0.164387	0.31314	0.188365	0.207017	0.0503442	0.0577781	0.141537
ENSDARG00000001909	vill	ENSDART00000048940	GO:0003779(actin binding);GO:0007010(cytoskeleton organization);GO:0051015(actin filament binding)		K05761		villin-like [Source:ZFIN;Acc:ZDB-GENE-081222-1]		0.92806	0.414106	2.9534	0.083716	0.916527	3.77794	1.76833	0.408623	2.71699	0.571933	3.74763	1.2158
ENSDARG00000001910	rorab	ENSDART00000019140;ENSDART00000173723	GO:0003677(DNA binding);GO:0003700(DNA-binding transcription factor activity);GO:0003707(steroid hormone receptor activity);GO:0004879(nuclear receptor activity);GO:0005634(nucleus);GO:0006355(regulation of transcription, DNA-templated);GO:0007275(multicellular organism development);GO:0008270(zinc ion binding);GO:0030522(intracellular receptor signaling pathway);GO:0043401(steroid hormone mediat…		K08532		RAR-related orphan receptor A, paralog b [Source:ZFIN;Acc:ZDB-GENE-040426-855]		3.77029	2.90036	3.50792	0.936402	5.18592	9.80409	5.55226	7.17943	5.26667	1.67116	9.46185	6.58366
ENSDARG00000001912	drd4-rs	ENSDART00000169248;ENSDART00000003420	GO:0001591(dopamine neurotransmitter receptor activity, coupled via Gi/Go);GO:0001963(synaptic transmission, dopaminergic);GO:0004930(G protein-coupled receptor activity);GO:0004935(adrenergic receptor activity);GO:0004952(dopamine neurotransmitter receptor activity);GO:0005887(integral component of plasma membrane);GO:0007165(signal transduction);GO:0007186(G protein-coupled receptor signaling p…	04080(Neuroactive ligand-receptor interaction);04080(Neuroactive ligand-receptor interaction)	K04147		dopamine receptor D4 related sequence [Source:ZFIN;Acc:ZDB-GENE-051113-172]		0.0203217	0.174428	0.024158	0.203	0.00780072	0.0154249	0.0528712	0.108932	0.00877872	0.0806058	0	0
ENSDARG00000001913	palmda	ENSDART00000006817;ENSDART00000137848;ENSDART00000185940	GO:0005737(cytoplasm);GO:0008360(regulation of cell shape);GO:0016020(membrane);GO:0016020(membrane)		K16519		palmdelphin a [Source:ZFIN;Acc:ZDB-GENE-070705-48]		0.1285	0.00688968	0.0243003	0.057259	0.0692696	0.28803	0.604404	0.185583	0.912845	0.0381146	0.0646418	1.77338
ENSDARG00000001929	pink1	ENSDART00000006436	GO:0000422(autophagy of mitochondrion);GO:0004672(protein kinase activity);GO:0004674(protein serine/threonine kinase activity);GO:0005524(ATP binding);GO:0005739(mitochondrion);GO:0005829(cytosol);GO:0006468(protein phosphorylation);GO:0007005(mitochondrion organization);GO:0048823(nucleate erythrocyte development);GO:0051402(neuron apoptotic process);GO:0060872(semicircular canal development);G…	04137(Mitophagy - animal)	K05688	EC:2.7.11.1	PTEN induced kinase 1 [Source:ZFIN;Acc:ZDB-GENE-041212-53]		5.49635	3.27191	13.1778	1.68192	30.2659	15.0436	10.6305	9.33689	19.9949	2.54332	16.0189	12.5651
ENSDARG00000001930	klhl15	ENSDART00000180687;ENSDART00000183812;ENSDART00000005331;ENSDART00000128446	GO:0005515(protein binding);GO:0016567(protein ubiquitination);GO:0031463(Cul3-RING ubiquitin ligase complex);GO:0031463(Cul3-RING ubiquitin ligase complex)		K10452		kelch-like family member 15 [Source:ZFIN;Acc:ZDB-GENE-040801-99]		3.17325	4.93408	1.81957	6.24471	1.59819	1.61229	1.31044	1.4558	1.41627	3.5603	1.73497	1.17844
ENSDARG00000001933	prkag2b	ENSDART00000142649;ENSDART00000192832	GO:0032559(adenyl ribonucleotide binding);GO:0071900(regulation of protein serine/threonine kinase activity);GO:0071900(regulation of protein serine/threonine kinase activity)	04068(FoxO signaling pathway);04371(Apelin signaling pathway);04530(Tight junction);04910(Insulin signaling pathway);04920(Adipocytokine signaling pathway);04920(Adipocytokine signaling pathway)	K07200		protein kinase, AMP-activated, gamma 2 non-catalytic subunit b [Source:ZFIN;Acc:ZDB-GENE-070912-442]		2.91131	0.868615	3.60306	0.418484	6.04031	9.28296	4.35803	2.86039	4.11712	0.383638	9.57409	5.17788
ENSDARG00000001937	LO018422	ENSDART00000019804	GO:0005215(transporter activity);GO:0016020(membrane);GO:0016021(integral component of membrane);GO:0022857(transmembrane transporter activity);GO:0055085(transmembrane transport)	04920(Adipocytokine signaling pathway)	K07299		solute carrier family 2, facilitated glucose transporter member 1-like [Source:NCBI gene;Acc:100334818]		0.024059	0	0	0	0.028708	0.072175	0.038581	0.008507	0.020149	0	0.04057	0.048481
ENSDARG00000001939	b3gat3	ENSDART00000149966;ENSDART00000175583;ENSDART00000149490	GO:0000139(Golgi membrane);GO:0005794(Golgi apparatus);GO:0006486(protein glycosylation);GO:0015012(heparan sulfate proteoglycan biosynthetic process);GO:0015018(galactosylgalactosylxylosylprotein 3-beta-glucuronosyltransferase activity);GO:0016020(membrane);GO:0016740(transferase activity);GO:0030166(proteoglycan biosynthetic process);GO:0030198(extracellular matrix organization);GO:0046872(meta…	00532(Glycosaminoglycan biosynthesis - chondroitin sulfate / dermatan sulfate);00534(Glycosaminoglycan biosynthesis - heparan sulfate / heparin);00534(Glycosaminoglycan biosynthesis - heparan sulfate / heparin)	K10158	EC:2.4.1.135	beta-1,3-glucuronyltransferase 3 (glucuronosyltransferase I) [Source:ZFIN;Acc:ZDB-GENE-020419-3]		4.44437	6.52198	1.80982	8.31288	0.770837	2.03824	1.19204	1.4593	0.856272	3.57433	1.61859	1.5051
ENSDARG00000001940	dnajc1	ENSDART00000079518;ENSDART00000123539;ENSDART00000123008;ENSDART00000147726	GO:0003677(DNA binding);GO:0005634(nucleus);GO:0016020(membrane);GO:0016021(integral component of membrane);GO:0016021(integral component of membrane)	04141(Protein processing in endoplasmic reticulum);04141(Protein processing in endoplasmic reticulum)	K09521		DnaJ (Hsp40) homolog, subfamily C, member 1 [Source:ZFIN;Acc:ZDB-GENE-061103-529]		41.0303	87.3246	104.655	121.681	39.2848	27.0518	21.3405	18.0869	22.8968	57.9108	30.1406	19.4099
ENSDARG00000001950	ak1	ENSDART00000187767;ENSDART00000013404	GO:0000166(nucleotide binding);GO:0004017(adenylate kinase activity);GO:0004550(nucleoside diphosphate kinase activity);GO:0005524(ATP binding);GO:0005737(cytoplasm);GO:0006139(nucleobase-containing compound metabolic process);GO:0006165(nucleoside diphosphate phosphorylation);GO:0006172(ADP biosynthetic process);GO:0009142(nucleoside triphosphate biosynthetic process);GO:0016301(kinase activity)…	00230(Purine metabolism);00730(Thiamine metabolism);00730(Thiamine metabolism)	K00939	EC:2.7.4.3	adenylate kinase 1 [Source:ZFIN;Acc:ZDB-GENE-040822-37]		219.473	115.683	1615.75	63.4186	1589.09	2040.11	1972.68	232.958	2637.98	121.235	1943.41	1985.14
ENSDARG00000001953	pfkfb3	ENSDART00000159941;ENSDART00000041402;ENSDART00000133991;ENSDART00000133237;ENSDART00000136720	GO:0003824(catalytic activity);GO:0003873(6-phosphofructo-2-kinase activity);GO:0004331(fructose-2,6-bisphosphate 2-phosphatase activity);GO:0005524(ATP binding);GO:0005575(cellular_component);GO:0005829(cytosol);GO:0006000(fructose metabolic process);GO:0006003(fructose 2,6-bisphosphate metabolic process);GO:0016301(kinase activity);GO:0016310(phosphorylation);GO:0016311(dephosphorylation);GO:00…	00051(Fructose and mannose metabolism);00051(Fructose and mannose metabolism)	K01103	3.1.3.46;EC:2.7.1.105	6-phosphofructo-2-kinase/fructose-2,6-biphosphatase 3 [Source:ZFIN;Acc:ZDB-GENE-040426-2724]		12.2234	59.8153	42.9406	1.56506	165.49	6.93149	8.82954	6.90108	3.17949	1.97648	12.7589	8.89938
ENSDARG00000001968	dock5	ENSDART00000135834	GO:0005085(guanyl-nucleotide exchange factor activity);GO:0005515(protein binding);GO:0007264(small GTPase mediated signal transduction);GO:0007520(myoblast fusion)		K17707		dedicator of cytokinesis 5 [Source:ZFIN;Acc:ZDB-GENE-080108-4]		0.507741	1.2078	0.455474	2.53468	0.01745	0.250301	0.043573	0.264281	0.048179	1.04442	0.077137	0
ENSDARG00000001969	txlng	ENSDART00000104143;ENSDART00000191178;ENSDART00000103449	GO:0005575(cellular_component);GO:0008150(biological_process);GO:0019905(syntaxin binding);GO:0019905(syntaxin binding)				taxilin gamma [Source:ZFIN;Acc:ZDB-GENE-060616-122]		5.78551	8.10032	5.88659	13.1882	3.32133	3.82394	2.15536	5.52172	1.79618	5.61535	2.56601	2.03875
ENSDARG00000001971	cthrc1b	ENSDART00000147072					collagen triple helix repeat containing 1b [Source:ZFIN;Acc:ZDB-GENE-050420-46]		0.0420119	0	0	0	0.25731	1.21919	0.57205	0.369616	0.466831	0.0957836	0.294617	1.50767
ENSDARG00000001975	hsd11b2	ENSDART00000141211	GO:0003845(11-beta-hydroxysteroid dehydrogenase [NAD(P)] activity);GO:0016020(membrane);GO:0016021(integral component of membrane);GO:0016491(oxidoreductase activity);GO:0033555(multicellular organismal response to stress);GO:0034650(cortisol metabolic process);GO:0055114(oxidation-reduction process)	00140(Steroid hormone biosynthesis)	K00071	EC:1.1.1.-	hydroxysteroid (11-beta) dehydrogenase 2 [Source:ZFIN;Acc:ZDB-GENE-030131-6030]		8.89059	5.8304	19.3206	1.51103	44.6793	10.2455	26.2973	40.7922	5.3073	2.50306	9.21093	31.7036
ENSDARG00000001976	fkbp16	ENSDART00000007856	GO:0000413(protein peptidyl-prolyl isomerization);GO:0003755(peptidyl-prolyl cis-trans isomerase activity);GO:0005515(protein binding);GO:0016020(membrane);GO:0016021(integral component of membrane);GO:0016853(isomerase activity)		K09574	EC:5.2.1.8	FKBP prolyl isomerase 16 [Source:ZFIN;Acc:ZDB-GENE-050208-116]		0.98002	0.756507	2.15455	0.761809	0.383507	2.05751	0.650144	0.453531	0.897838	1.11284	1.44408	0.931156
ENSDARG00000001993	myhb	ENSDART00000026257;ENSDART00000156295	GO:0000166(nucleotide binding);GO:0003774(motor activity);GO:0003779(actin binding);GO:0005515(protein binding);GO:0005524(ATP binding);GO:0016459(myosin complex);GO:0051015(actin filament binding);GO:0051015(actin filament binding)	04530(Tight junction);04530(Tight junction)	K10352		myosin, heavy chain b [Source:ZFIN;Acc:ZDB-GENE-081124-1]		28.7259	53.9277	1.84234	0.0963174	13.9386	1.44462	0.32738	29.2421	0.408791	6.67135	0.420564	0.681314
ENSDARG00000001994	stxbp1a	ENSDART00000015629;ENSDART00000171306;ENSDART00000148199	GO:0003674(molecular_function);GO:0005575(cellular_component);GO:0006904(vesicle docking involved in exocytosis);GO:0016192(vesicle-mediated transport);GO:0016192(vesicle-mediated transport)		K15292		syntaxin binding protein 1a [Source:ZFIN;Acc:ZDB-GENE-050626-106]		0.508801	0.418256	1.13114	0.0171899	1.11712	1.82095	1.0947	0.646939	1.38036	0.206743	1.20114	1.19198
ENSDARG00000001999	adamts18	ENSDART00000004120;ENSDART00000190350	GO:0004222(metalloendopeptidase activity);GO:0006508(proteolysis);GO:0008233(peptidase activity);GO:0008237(metallopeptidase activity);GO:0008237(metallopeptidase activity)		K08632	EC:3.4.24.-	ADAM metallopeptidase with thrombospondin type 1 motif, 18 [Source:ZFIN;Acc:ZDB-GENE-070815-1]		0.0322849	0.033265	0.0332353	0.0552958	0	0.0449464	0.211493	0.0693424	0.0260945	0.0260826	0.00876532	0.0486181
ENSDARG00000002002	lmcd1	ENSDART00000157127;ENSDART00000153841	GO:0008150(biological_process);GO:0008270(zinc ion binding);GO:0046872(metal ion binding);GO:0046872(metal ion binding)				LIM and cysteine-rich domains 1 [Source:ZFIN;Acc:ZDB-GENE-040426-1067]		9.99106	15.5645	6.52585	37.868	2.59189	4.39315	2.09092	1.25775	2.89811	15.9953	2.39937	2.52713
ENSDARG00000002006	rxrbb	ENSDART00000180168;ENSDART00000021596;ENSDART00000147844	GO:0003677(DNA binding);GO:0003700(DNA-binding transcription factor activity);GO:0003707(steroid hormone receptor activity);GO:0005634(nucleus);GO:0006355(regulation of transcription, DNA-templated);GO:0008270(zinc ion binding);GO:0043401(steroid hormone mediated signaling pathway);GO:0043565(sequence-specific DNA binding);GO:0046872(metal ion binding);GO:0046872(metal ion binding)				retinoid x receptor, beta b [Source:ZFIN;Acc:ZDB-GENE-990415-242]		2.16156	3.59556	5.76326	0.92735	4.29569	5.95293	3.86194	4.22548	3.24494	1.10148	3.44139	3.48926
ENSDARG00000002013	grb10a	ENSDART00000140665;ENSDART00000042172	GO:0005575(cellular_component);GO:0007165(signal transduction);GO:0007165(signal transduction)				growth factor receptor-bound protein 10a [Source:ZFIN;Acc:ZDB-GENE-040822-32]		1.14596	1.47845	1.82318	0.963638	4.01791	1.97162	1.33528	1.38624	1.37912	0.584811	0.760491	1.42614
ENSDARG00000002016	ppil2	ENSDART00000051663	GO:0000209(protein polyubiquitination);GO:0000413(protein peptidyl-prolyl isomerization);GO:0003755(peptidyl-prolyl cis-trans isomerase activity);GO:0004842(ubiquitin-protein transferase activity);GO:0005634(nucleus);GO:0006457(protein folding);GO:0016567(protein ubiquitination);GO:0034450(ubiquitin-ubiquitin ligase activity)	04120(Ubiquitin mediated proteolysis)	K10598	EC:5.2.1.8	peptidylprolyl isomerase (cyclophilin)-like 2 [Source:ZFIN;Acc:ZDB-GENE-040426-1096]		19.2824	31.9463	8.63115	50.8742	3.98169	6.20679	5.13802	9.17905	3.98133	26.6522	5.46458	3.48167
ENSDARG00000002020	rictorb	ENSDART00000184832;ENSDART00000142961;ENSDART00000058311	GO:0008047(enzyme activator activity);GO:0030010(establishment of cell polarity);GO:0030950(establishment or maintenance of actin cytoskeleton polarity);GO:0031532(actin cytoskeleton reorganization);GO:0031929(TOR signaling);GO:0031932(TORC2 complex);GO:0032956(regulation of actin cytoskeleton organization);GO:0042325(regulation of phosphorylation);GO:0043085(positive regulation of catalytic acti…	04150(mTOR signaling pathway);04150(mTOR signaling pathway)	K08267		RPTOR independent companion of MTOR, complex 2b [Source:ZFIN;Acc:ZDB-GENE-070810-5]		2.42338	2.042	1.11744	3.00133	1.35723	1.9273	1.34078	1.96442	1.29497	1.47956	1.06375	0.915857
ENSDARG00000002021	pygb	ENSDART00000022830	GO:0004645(phosphorylase activity);GO:0005737(cytoplasm);GO:0005975(carbohydrate metabolic process);GO:0005980(glycogen catabolic process);GO:0008184(glycogen phosphorylase activity);GO:0016740(transferase activity);GO:0016757(transferase activity, transferring glycosyl groups);GO:0030170(pyridoxal phosphate binding);GO:0102250(linear malto-oligosaccharide phosphorylase activity);GO:0102499(SHG a…	00500(Starch and sucrose metabolism);04217(Necroptosis);04910(Insulin signaling pathway)	K00688	EC:2.4.1.1	phosphorylase, glycogen; brain [Source:ZFIN;Acc:ZDB-GENE-040928-2]		15.5815	22.9855	8.59528	35.8922	11.8989	11.1977	8.48998	12.6043	4.28843	17.9837	7.28577	5.46544
ENSDARG00000002026	qkib	ENSDART00000131553;ENSDART00000189841;ENSDART00000183554;ENSDART00000018737;ENSDART00000136913	GO:0003676(nucleic acid binding);GO:0003723(RNA binding);GO:0003723(RNA binding)		K14945		QKI, KH domain containing, RNA binding b [Source:ZFIN;Acc:ZDB-GENE-081028-54]		0.0876595	0.0846298	0.0843101	0.0101383	0.0976358	0.10907	0	0.0719942	0.0491197	0	0	0.0331741
ENSDARG00000002031	tox4a	ENSDART00000056544	GO:0003677(DNA binding);GO:0005634(nucleus)				TOX high mobility group box family member 4 a [Source:ZFIN;Acc:ZDB-GENE-070912-576]		17.7345	23.5728	5.44271	51.0441	3.16756	3.59623	2.52962	3.96133	2.51215	21.9075	3.14083	3.21355
ENSDARG00000002037	pfkfb2b	ENSDART00000156276;ENSDART00000180504;ENSDART00000185438	GO:0003824(catalytic activity);GO:0003873(6-phosphofructo-2-kinase activity);GO:0004331(fructose-2,6-bisphosphate 2-phosphatase activity);GO:0005524(ATP binding);GO:0005829(cytosol);GO:0006000(fructose metabolic process);GO:0006003(fructose 2,6-bisphosphate metabolic process);GO:0016311(dephosphorylation);GO:0046835(carbohydrate phosphorylation);GO:0046835(carbohydrate phosphorylation)	00051(Fructose and mannose metabolism);00051(Fructose and mannose metabolism)	K19029	3.1.3.46;EC:2.7.1.105	6-phosphofructo-2-kinase/fructose-2,6-biphosphatase 2b [Source:ZFIN;Acc:ZDB-GENE-120222-1]		1.33544	0.754764	0.944708	3.36124	0.219007	4.18961	3.67867	1.2967	2.84487	3.10593	1.56992	3.18787
ENSDARG00000002060	brf2	ENSDART00000160174;ENSDART00000169493;ENSDART00000183850;ENSDART00000141190;ENSDART00000020297	GO:0006355(regulation of transcription, DNA-templated);GO:0046872(metal ion binding);GO:0070897(transcription preinitiation complex assembly);GO:0070897(transcription preinitiation complex assembly)		K15197		BRF2, RNA polymerase III transcription initiation factor [Source:ZFIN;Acc:ZDB-GENE-040801-43]		8.03873	13.3216	3.20069	23.2099	0.87485	1.20212	1.4939	3.67257	0.564942	10.9626	1.38069	0.579631
ENSDARG00000002071	adss	ENSDART00000018155	GO:0000166(nucleotide binding);GO:0000287(magnesium ion binding);GO:0004019(adenylosuccinate synthase activity);GO:0005525(GTP binding);GO:0005737(cytoplasm);GO:0006164(purine nucleotide biosynthetic process);GO:0006167(AMP biosynthetic process);GO:0016874(ligase activity);GO:0044208('de novo' AMP biosynthetic process);GO:0046040(IMP metabolic process);GO:0046872(metal ion binding)	00230(Purine metabolism);00250(Alanine, aspartate and glutamate metabolism)	K01939	EC:6.3.4.4	adenylosuccinate synthase [Source:ZFIN;Acc:ZDB-GENE-050417-337]		7.67245	0.919723	3.98285	1.18044	23.3506	29.8138	17.1422	6.88078	19.1175	1.91665	24.6592	18.7555
ENSDARG00000002077	mnat1	ENSDART00000006648	GO:0000079(regulation of cyclin-dependent protein serine/threonine kinase activity);GO:0005675(transcription factor TFIIH holo complex);GO:0006289(nucleotide-excision repair);GO:0006357(regulation of transcription by RNA polymerase II);GO:0045737(positive regulation of cyclin-dependent protein serine/threonine kinase activity);GO:0061575(cyclin-dependent protein serine/threonine kinase activator …	03022(Basal transcription factors);03420(Nucleotide excision repair)	K10842		MNAT CDK-activating kinase assembly factor 1 [Source:ZFIN;Acc:ZDB-GENE-041010-203]		6.73387	8.15742	2.8027	14.7448	2.99306	4.06015	3.20113	3.74369	2.34854	6.56651	3.52354	2.21298
ENSDARG00000002082	csnk2a1	ENSDART00000192354;ENSDART00000008297;ENSDART00000056551;ENSDART00000147373;ENSDART00000146886;ENSDART00000140880	GO:0000166(nucleotide binding);GO:0004672(protein kinase activity);GO:0004674(protein serine/threonine kinase activity);GO:0005524(ATP binding);GO:0006468(protein phosphorylation);GO:0016301(kinase activity);GO:0016310(phosphorylation);GO:0016310(phosphorylation)	03008(Ribosome biogenesis in eukaryotes);04137(Mitophagy - animal);04310(Wnt signaling pathway);04520(Adherens junction);04520(Adherens junction)	K03097	EC:2.7.11.1	casein kinase 2, alpha 1 polypeptide [Source:ZFIN;Acc:ZDB-GENE-990415-27]		19.774	32.5737	13.9103	49.1923	10.2252	10.816	14.8836	25.0797	7.34621	21.3493	10.0256	9.69956
ENSDARG00000002084	lamb2	ENSDART00000147326	GO:0016203(muscle attachment);GO:0061053(somite development);GO:0070831(basement membrane assembly)	04510(Focal adhesion);04512(ECM-receptor interaction)	K06243		laminin, beta 2 (laminin S) [Source:ZFIN;Acc:ZDB-GENE-081030-4]		2.62071	1.46849	9.59251	0.358353	15.3525	8.7851	6.72619	3.59174	8.0007	0.762471	5.97828	13.0229
ENSDARG00000002097	si:dkeyp-52c3	ENSDART00000149308	GO:0005525(GTP binding)				si:dkeyp-52c3.7 [Source:ZFIN;Acc:ZDB-GENE-110411-213]		0.041511	0	0.149393	0.101445	1.01292	0.851976	0.190187	0.558209	0.449074	0.024597	0.787719	0.93528
ENSDARG00000002127	stam	ENSDART00000141170;ENSDART00000142727	GO:0005515(protein binding);GO:0005623(cell);GO:0006886(intracellular protein transport);GO:0006886(intracellular protein transport)	04144(Endocytosis);04144(Endocytosis)	K04705		signal transducing adaptor molecule (SH3 domain and ITAM motif) 1 [Source:ZFIN;Acc:ZDB-GENE-031118-123]		14.0312	28.1641	17.4539	29.1222	9.46835	6.38431	4.45229	10.1126	4.25443	11.9958	5.13651	4.10563
ENSDARG00000002128	cwf19l1	ENSDART00000026509	GO:0005575(cellular_component)				CWF19 like cell cycle control factor 1 [Source:ZFIN;Acc:ZDB-GENE-031204-5]		10.272	18.1599	6.13397	27.7288	4.64968	5.67881	3.29783	6.73393	3.13527	13.4161	4.66228	2.37931
ENSDARG00000002131	celf2	ENSDART00000133433;ENSDART00000135942;ENSDART00000139439;ENSDART00000077926;ENSDART00000017443;ENSDART00000132615;ENSDART00000138873	GO:0000381(regulation of alternative mRNA splicing, via spliceosome);GO:0003676(nucleic acid binding);GO:0003723(RNA binding);GO:0003729(mRNA binding);GO:0005634(nucleus);GO:0005737(cytoplasm);GO:0006376(mRNA splice site selection);GO:0006397(mRNA processing);GO:1990904(ribonucleoprotein complex);GO:1990904(ribonucleoprotein complex)		K13207		cugbp, Elav-like family member 2 [Source:ZFIN;Acc:ZDB-GENE-030826-35]		0.672261	0.59736	0.818276	0.521182	0.534528	1.38202	0.462324	0.387141	0.490966	0.427391	0.304097	0.433231
ENSDARG00000002165	psme1	ENSDART00000005105;ENSDART00000133925	GO:0000502(proteasome complex);GO:0005654(nucleoplasm);GO:0005737(cytoplasm);GO:0008537(proteasome activator complex);GO:0010950(positive regulation of endopeptidase activity);GO:0061133(endopeptidase activator activity);GO:0061136(regulation of proteasomal protein catabolic process);GO:2000045(regulation of G1/S transition of mitotic cell cycle);GO:2000045(regulation of G1/S transition of mitoti…	03050(Proteasome);03050(Proteasome)	K06696		proteasome activator subunit 1 [Source:ZFIN;Acc:ZDB-GENE-991110-17]		62.401	19.2263	54.9985	6.49901	106.752	90.1894	46.757	52.2856	28.0545	23.2335	79.5564	57.7793
ENSDARG00000002167	cacnb1	ENSDART00000057159;ENSDART00000111707;ENSDART00000012835;ENSDART00000130611;ENSDART00000127275	GO:0005245(voltage-gated calcium channel activity);GO:0005515(protein binding);GO:0005891(voltage-gated calcium channel complex);GO:0006936(muscle contraction);GO:0007268(chemical synaptic transmission);GO:0007528(neuromuscular junction development);GO:0008331(high voltage-gated calcium channel activity);GO:0016020(membrane);GO:0070588(calcium ion transmembrane transport);GO:0070978(voltage-gated…	04010(MAPK signaling pathway);04260(Cardiac muscle contraction);04261(Adrenergic signaling in cardiomyocytes);04261(Adrenergic signaling in cardiomyocytes)	K04862		calcium channel, voltage-dependent, beta 1 subunit [Source:ZFIN;Acc:ZDB-GENE-040718-399]		1.1703	1.21786	1.65276	1.37514	0.830524	2.35914	1.51493	2.27743	0.940234	0.905374	0.962844	1.49456
ENSDARG00000002168	tra2b	ENSDART00000021266;ENSDART00000184900;ENSDART00000132331;ENSDART00000146127;ENSDART00000142024	GO:0003676(nucleic acid binding);GO:0003723(RNA binding);GO:0005681(spliceosomal complex);GO:0048026(positive regulation of mRNA splicing, via spliceosome);GO:1990904(ribonucleoprotein complex);GO:1990904(ribonucleoprotein complex)	03040(Spliceosome);03040(Spliceosome)	K12897		transformer 2 beta homolog [Source:ZFIN;Acc:ZDB-GENE-040426-1094]		9.90532	13.1074	4.28252	22.6419	6.36681	9.5568	5.78727	10.8456	5.47488	10.3847	9.32555	6.78312
ENSDARG00000002172	aplnra	ENSDART00000074125	GO:0001525(angiogenesis);GO:0001568(blood vessel development);GO:0001570(vasculogenesis);GO:0001702(gastrulation with mouth forming second);GO:0001945(lymph vessel development);GO:0004930(G protein-coupled receptor activity);GO:0005886(plasma membrane);GO:0007165(signal transduction);GO:0007186(G protein-coupled receptor signaling pathway);GO:0007275(multicellular organism development);GO:0007369…	04080(Neuroactive ligand-receptor interaction);04371(Apelin signaling pathway)	K04174		apelin receptor a [Source:ZFIN;Acc:ZDB-GENE-060929-512]		0.785391	0.555618	3.65963	0.225448	0.770318	3.99109	3.2324	1.68392	4.33529	0.171358	2.83988	2.72387
ENSDARG00000002174	itfg2	ENSDART00000013313	GO:0003674(molecular_function);GO:0005515(protein binding)		K23296		integrin alpha FG-GAP repeat containing 2 [Source:ZFIN;Acc:ZDB-GENE-041008-161]		7.35252	8.651	2.32379	16.3973	2.77723	4.00565	3.54137	4.89009	1.99799	7.2184	2.77949	1.36692
ENSDARG00000002184	igbp1	ENSDART00000006899;ENSDART00000146814	GO:0005829(cytosol);GO:0009966(regulation of signal transduction);GO:0051721(protein phosphatase 2A binding);GO:0051721(protein phosphatase 2A binding)	04136(Autophagy - other);04140(Autophagy - animal);04140(Autophagy - animal)	K17606		immunoglobulin (CD79A) binding protein 1 [Source:ZFIN;Acc:ZDB-GENE-040426-2928]		14.6847	26.7368	23.9345	35.8775	10.5741	9.60348	6.48989	9.03458	4.8371	17.1977	8.75506	6.57875
ENSDARG00000002190	chmp2bb	ENSDART00000018472	GO:0000815(ESCRT III complex);GO:0005737(cytoplasm);GO:0005768(endosome);GO:0005771(multivesicular body);GO:0005829(cytosol);GO:0007034(vacuolar transport);GO:0015031(protein transport);GO:0016020(membrane);GO:0031902(late endosome membrane);GO:0032509(endosome transport via multivesicular body sorting pathway);GO:0045324(late endosome to vacuole transport)	04144(Endocytosis);04217(Necroptosis)	K12192		charged multivesicular body protein 2Bb [Source:ZFIN;Acc:ZDB-GENE-040426-2539]		19.9343	41.6717	110.016	30.6003	46.5224	40.6532	18.1304	20.2743	14.5526	13.8944	52.8105	28.4484
ENSDARG00000002192	aspn	ENSDART00000143164;ENSDART00000064798;ENSDART00000184366	GO:0005509(calcium ion binding);GO:0005515(protein binding);GO:0005518(collagen binding);GO:0005518(collagen binding)		K08120		asporin (LRR class 1) [Source:ZFIN;Acc:ZDB-GENE-041105-7]		0.744907	0.262137	0.536998	0.194108	0.962449	1.70033	2.13322	0.626926	0.904842	0.164805	0.48992	7.81591
ENSDARG00000002193	rho	ENSDART00000027000	GO:0001750(photoreceptor outer segment);GO:0004930(G protein-coupled receptor activity);GO:0005502(11-cis retinal binding);GO:0005887(integral component of plasma membrane);GO:0007165(signal transduction);GO:0007186(G protein-coupled receptor signaling pathway);GO:0007601(visual perception);GO:0007602(phototransduction);GO:0008020(G protein-coupled photoreceptor activity);GO:0009583(detection of …	04744(Phototransduction)	K04250		rhodopsin [Source:ZFIN;Acc:ZDB-GENE-990415-271]		0	0	0	0.024647	0	0	0	0.03866	0	0	0	0
ENSDARG00000002194	rhd	ENSDART00000020663;ENSDART00000137566	GO:0005887(integral component of plasma membrane);GO:0008519(ammonium transmembrane transporter activity);GO:0015696(ammonium transport);GO:0016020(membrane);GO:0016021(integral component of membrane);GO:0072488(ammonium transmembrane transport);GO:0072488(ammonium transmembrane transport)				Rh blood group, D antigen [Source:ZFIN;Acc:ZDB-GENE-051213-1]		1.10674	0.236287	0.696567	0	0.382851	1.56152	1.02922	4.18658	1.43412	0.156378	0.844871	0.79724
ENSDARG00000002196	bach1b	ENSDART00000164375	GO:0000976(transcription regulatory region sequence-specific DNA binding);GO:0003677(DNA binding);GO:0003700(DNA-binding transcription factor activity);GO:0005515(protein binding);GO:0005634(nucleus);GO:0006355(regulation of transcription, DNA-templated)				BTB and CNC homology 1, basic leucine zipper transcription factor 1 b [Source:ZFIN;Acc:ZDB-GENE-050522-220]		3.58461	15.9761	11.0892	0.372544	10.302	8.06987	2.12403	4.90675	3.59259	0.827966	15.1418	3.81791
ENSDARG00000002197	pygl	ENSDART00000149011;ENSDART00000023449	GO:0004645(phosphorylase activity);GO:0005737(cytoplasm);GO:0005975(carbohydrate metabolic process);GO:0005980(glycogen catabolic process);GO:0008184(glycogen phosphorylase activity);GO:0016740(transferase activity);GO:0016757(transferase activity, transferring glycosyl groups);GO:0030170(pyridoxal phosphate binding);GO:0102250(linear malto-oligosaccharide phosphorylase activity);GO:0102499(SHG a…	00500(Starch and sucrose metabolism);04217(Necroptosis);04910(Insulin signaling pathway);04910(Insulin signaling pathway)	K00688	EC:2.4.1.1	phosphorylase, glycogen, liver [Source:ZFIN;Acc:ZDB-GENE-041205-1]		135.354	93.3008	5.69472	124.126	0.681403	1.34497	2.8868	143.93	0.671693	68.6561	2.2912	0.405763
ENSDARG00000002204	hspb11	ENSDART00000026430					heat shock protein, alpha-crystallin-related, b11 [Source:ZFIN;Acc:ZDB-GENE-030131-5148]		29.8237	80.9343	264.276	0.639722	440.76	94.2452	22.0664	0.876266	56.6015	1.87748	27.734	40.3639
ENSDARG00000002210	stk25a	ENSDART00000149363;ENSDART00000148683;ENSDART00000149148;ENSDART00000150125	GO:0003401(axis elongation);GO:0004672(protein kinase activity);GO:0004674(protein serine/threonine kinase activity);GO:0005524(ATP binding);GO:0005737(cytoplasm);GO:0006468(protein phosphorylation);GO:0007507(heart development);GO:0023014(signal transduction by protein phosphorylation);GO:0031098(stress-activated protein kinase signaling cascade);GO:0032147(activation of protein kinase activity)…		K08838	EC:2.7.11.1	serine/threonine kinase 25a [Source:ZFIN;Acc:ZDB-GENE-041010-92]		2.49159	3.03277	0.874065	1.19734	0.673215	0.606534	5.20346	13.2777	0.420257	0.798448	1.12024	1.55796
ENSDARG00000002213	invs	ENSDART00000015688;ENSDART00000157690	GO:0005515(protein binding);GO:0005515(protein binding)	04310(Wnt signaling pathway);04310(Wnt signaling pathway)	K19626		inversin [Source:ZFIN;Acc:ZDB-GENE-020507-2]		1.84488	2.09644	0.75355	0.951819	1.54652	1.27072	0.939899	2.14528	0.474191	1.26274	0.519926	1.31517
ENSDARG00000002215	rtca	ENSDART00000021666;ENSDART00000149071	GO:0000166(nucleotide binding);GO:0003824(catalytic activity);GO:0003963(RNA-3'-phosphate cyclase activity);GO:0005524(ATP binding);GO:0005634(nucleus);GO:0006396(RNA processing);GO:0006396(RNA processing)		K01974	EC:6.5.1.4	RNA 3'-terminal phosphate cyclase [Source:ZFIN;Acc:ZDB-GENE-030131-9687]		16.8806	33.9256	14.6665	53.1662	10.132	8.05187	7.10122	8.9995	4.53224	21.2312	7.79709	7.82199
ENSDARG00000002216	tbx3a	ENSDART00000006380	GO:0003677(DNA binding);GO:0003700(DNA-binding transcription factor activity);GO:0005634(nucleus);GO:0006355(regulation of transcription, DNA-templated);GO:0035050(embryonic heart tube development)		K10177		T-box 3a [Source:ZFIN;Acc:ZDB-GENE-070209-80]		0.744468	1.18409	0.700728	0.091393	0.268669	0.423291	3.78057	3.10337	0.53985	0.293688	0.172797	0.758203
ENSDARG00000002217	scocb	ENSDART00000021736			K20316		short coiled-coil protein b [Source:ZFIN;Acc:ZDB-GENE-041010-41]		1.24635	3.12344	4.11261	1.98572	1.8054	1.50633	1.18284	2.59169	1.04973	0.963417	0.931232	1.38034
ENSDARG00000002219	si:dkey-103j14	ENSDART00000132828;ENSDART00000051886	GO:0004067(asparaginase activity);GO:0005737(cytoplasm);GO:0006508(proteolysis);GO:0008798(beta-aspartyl-peptidase activity);GO:0016787(hydrolase activity);GO:0033345(asparagine catabolic process via L-aspartate);GO:0051604(protein maturation);GO:0051604(protein maturation)		K13051	EC:3.4.19.5	si:dkey-103j14.5 [Source:ZFIN;Acc:ZDB-GENE-090313-170]		0.281703	0.071461	0.390575	0	0	0.213054	0.313448	1.30237	0	0.136515	0.120086	0
ENSDARG00000002220	zgc:103692	ENSDART00000015076	GO:0003674(molecular_function);GO:0005575(cellular_component);GO:0005634(nucleus);GO:0005681(spliceosomal complex);GO:0008150(biological_process);GO:0048024(regulation of mRNA splicing, via spliceosome)				zgc:103692 [Source:ZFIN;Acc:ZDB-GENE-041010-15]		15.4978	31.1379	19.0332	41.6695	7.41653	7.08677	7.07214	11.1225	6.92516	17.6118	7.92563	7.56726
ENSDARG00000002230	sypb	ENSDART00000114173;ENSDART00000011453;ENSDART00000088240	GO:0008021(synaptic vesicle);GO:0016020(membrane);GO:0016021(integral component of membrane);GO:0048168(regulation of neuronal synaptic plasticity);GO:0048168(regulation of neuronal synaptic plasticity)				synaptophysin b [Source:ZFIN;Acc:ZDB-GENE-040718-205]		0.0572325	0.086079	0.160078	0.027835	0.374458	0.365382	0.647934	2.36266	0.214557	0.0934641	0.100973	0.218454
ENSDARG00000002231	plpp2a	ENSDART00000006216	GO:0005887(integral component of plasma membrane);GO:0006644(phospholipid metabolic process);GO:0008195(phosphatidate phosphatase activity);GO:0016020(membrane);GO:0016021(integral component of membrane);GO:0016791(phosphatase activity);GO:0042577(lipid phosphatase activity);GO:0046839(phospholipid dephosphorylation)	00561(Glycerolipid metabolism);00564(Glycerophospholipid metabolism);00565(Ether lipid metabolism);00600(Sphingolipid metabolism)	K01080	EC:3.1.3.4	phospholipid phosphatase 2a [Source:ZFIN;Acc:ZDB-GENE-140703-2]		0.798661	2.14371	0.334413	0.765498	0.083481	0.24629	0.403878	0.70667	0.205461	0.294385	0.426405	0.148859
ENSDARG00000002235	mmp14a	ENSDART00000005884	GO:0001501(skeletal system development);GO:0001666(response to hypoxia);GO:0003407(neural retina development);GO:0004222(metalloendopeptidase activity);GO:0005615(extracellular space);GO:0006508(proteolysis);GO:0008233(peptidase activity);GO:0008237(metallopeptidase activity);GO:0008270(zinc ion binding);GO:0009948(anterior/posterior axis specification);GO:0010842(retina layer formation);GO:00160…	04912(GnRH signaling pathway)	K07763	EC:3.4.24.80	matrix metallopeptidase 14a (membrane-inserted) [Source:ZFIN;Acc:ZDB-GENE-030901-1]		4.92564	8.63741	23.2271	1.38456	28.4347	17.1584	15.2658	10.151	10.9924	1.90688	7.67846	22.3337
ENSDARG00000002240	psmb6	ENSDART00000024082;ENSDART00000126779	GO:0000502(proteasome complex);GO:0004175(endopeptidase activity);GO:0004298(threonine-type endopeptidase activity);GO:0005634(nucleus);GO:0005737(cytoplasm);GO:0005839(proteasome core complex);GO:0006508(proteolysis);GO:0008233(peptidase activity);GO:0010498(proteasomal protein catabolic process);GO:0010499(proteasomal ubiquitin-independent protein catabolic process);GO:0016787(hydrolase activit…	03050(Proteasome);03050(Proteasome)	K02738	EC:3.4.25.1	proteasome subunit beta 6 [Source:ZFIN;Acc:ZDB-GENE-990415-216]		33.4569	55.8147	111.036	31.4905	60.5246	32.0191	18.915	23.4726	15.8023	25.2106	36.4887	24.5087
ENSDARG00000002241	kcna2a	ENSDART00000027398	GO:0005216(ion channel activity);GO:0005244(voltage-gated ion channel activity);GO:0005249(voltage-gated potassium channel activity);GO:0005251(delayed rectifier potassium channel activity);GO:0005267(potassium channel activity);GO:0005515(protein binding);GO:0006811(ion transport);GO:0006813(potassium ion transport);GO:0008076(voltage-gated potassium channel complex);GO:0016020(membrane);GO:0016…		K04875		potassium voltage-gated channel, shaker-related subfamily, member 2a [Source:ZFIN;Acc:ZDB-GENE-131113-1]		0	0	0	0.10187	0	0.037262	0	0.04033	0.062118	0.034146	0	0
ENSDARG00000002249	tbxas1	ENSDART00000144246	GO:0004497(monooxygenase activity);GO:0005506(iron ion binding);GO:0016491(oxidoreductase activity);GO:0016705(oxidoreductase activity, acting on paired donors, with incorporation or reduction of molecular oxygen);GO:0020037(heme binding);GO:0046872(metal ion binding);GO:0055114(oxidation-reduction process)	00590(Arachidonic acid metabolism)	K01832	EC:5.3.99.5	thromboxane A synthase 1 (platelet) [Source:ZFIN;Acc:ZDB-GENE-030131-8805]		5.91016	11.3505	17.4988	4.3244	13.9857	7.42565	7.82754	24.2535	5.66135	4.14325	9.57621	1.54345		11.5865	8.57859	12.5808	5.08764
ENSDARG00000002255	epb41l3a	ENSDART00000130310;ENSDART00000022349	GO:0001558(regulation of cell growth);GO:0003779(actin binding);GO:0005198(structural molecule activity);GO:0005856(cytoskeleton);GO:0005886(plasma membrane);GO:0005911(cell-cell junction);GO:0007010(cytoskeleton organization);GO:0007016(cytoskeletal anchoring at plasma membrane);GO:0008092(cytoskeletal protein binding);GO:0030866(cortical actin cytoskeleton organization);GO:0031032(actomyosin st…		K06107		erythrocyte membrane protein band 4.1-like 3a [Source:ZFIN;Acc:ZDB-GENE-040822-8]		0.126987	1.77089	0.550826	1.53472	0.472123	0.666091	0.859074	2.92017	0.280793	0.962023	0.462146	0.560321
ENSDARG00000002259	ca15c	ENSDART00000112433	GO:0004089(carbonate dehydratase activity);GO:0005575(cellular_component);GO:0008270(zinc ion binding);GO:0046872(metal ion binding)				carbonic anhydrase XV c [Source:ZFIN;Acc:ZDB-GENE-061013-737]		0	0	0	0.066903	0	0.092977	0	0	0	0	0.380277	0.110745
ENSDARG00000002264	mrpl41	ENSDART00000012268;ENSDART00000188951			K17422		mitochondrial ribosomal protein L41 [Source:ZFIN;Acc:ZDB-GENE-050522-200]		14.0721	24.8008	19.7062	25.083	28.7821	13.9168	18.8565	11.0749	12.4492	14.5882	21.4144	13.6794
ENSDARG00000002267	dcaf13	ENSDART00000015139;ENSDART00000139307;ENSDART00000148355	GO:0005515(protein binding);GO:0005515(protein binding)		K11806		ddb1 and cul4 associated factor 13 [Source:ZFIN;Acc:ZDB-GENE-040426-703]		17.5954	36.6467	7.47869	49.7484	3.52059	4.27314	4.46233	5.56967	3.22281	20.7697	4.15952	4.32447
ENSDARG00000002271	zfand5b	ENSDART00000024450;ENSDART00000139259;ENSDART00000188770	GO:0003677(DNA binding);GO:0008270(zinc ion binding);GO:0046872(metal ion binding);GO:0046872(metal ion binding)				zinc finger, AN1-type domain 5b [Source:ZFIN;Acc:ZDB-GENE-040426-875]		66.3517	123.431	190.164	138.306	111.14	39.1771	27.8227	13.3634	30.7977	74.3734	53.5846	34.2198
ENSDARG00000002285	mcoln1a	ENSDART00000146101	GO:0001895(retina homeostasis);GO:0005261(cation channel activity);GO:0005764(lysosome);GO:0005765(lysosomal membrane);GO:0005770(late endosome);GO:0005886(plasma membrane);GO:0006914(autophagy);GO:0016020(membrane);GO:0016021(integral component of membrane);GO:0034220(ion transmembrane transport);GO:0035675(neuromast hair cell development);GO:0051209(release of sequestered calcium ion into cytos…	04142(Lysosome)	K04992		mucolipin 1a [Source:ZFIN;Acc:ZDB-GENE-040426-2704]		2.49451	2.2898	2.58664	1.61929	2.19669	2.04859	1.05318	2.54065	0.679721	0.888137	1.29437	0.749231
ENSDARG00000002293	si:ch211-197g15	ENSDART00000105455;ENSDART00000160415	GO:0005525(GTP binding);GO:0006955(immune response);GO:0006955(immune response)				si:ch211-197g15.6 [Source:ZFIN;Acc:ZDB-GENE-050208-457]		1.80019	2.73907	5.13103	2.31064	19.4309	26.2099	5.23199	4.77202	5.2234	1.34192	27.6171	11.3853
ENSDARG00000002295	si:dkey-21p1	ENSDART00000134775	GO:0005201(extracellular matrix structural constituent)				si:dkey-21p1.3 [Source:ZFIN;Acc:ZDB-GENE-081105-162]		0	0	0	0	0	0.140747	0.058837	0.094115	0	0	0	0.048144
ENSDARG00000002298	ankrd22	ENSDART00000028003	GO:0003674(molecular_function);GO:0005515(protein binding);GO:0008150(biological_process);GO:0016020(membrane);GO:0016021(integral component of membrane)				ankyrin repeat domain 22 [Source:ZFIN;Acc:ZDB-GENE-040426-1120]		16.9579	45.889	12.5991	63.1928	4.42616	3.16242	1.92286	2.69898	1.12423	25.4969	6.32015	3.40112
ENSDARG00000002299	arsh	ENSDART00000181886;ENSDART00000032992	GO:0003824(catalytic activity);GO:0008484(sulfuric ester hydrolase activity);GO:0016020(membrane);GO:0016021(integral component of membrane);GO:0016021(integral component of membrane)		K12374	EC:3.1.6.-	arylsulfatase H [Source:ZFIN;Acc:ZDB-GENE-081104-120]		2.49336	2.17727	1.06721	0.0854877	2.23843	4.28148	1.41806	6.10136	1.73183	1.83076	2.15536	1.28048
ENSDARG00000002300	p2rx2	ENSDART00000190310;ENSDART00000019461	GO:0001614(purinergic nucleotide receptor activity);GO:0004931(extracellularly ATP-gated cation channel activity);GO:0005216(ion channel activity);GO:0005524(ATP binding);GO:0005639(integral component of nuclear inner membrane);GO:0005887(integral component of plasma membrane);GO:0006811(ion transport);GO:0006812(cation transport);GO:0016020(membrane);GO:0016021(integral component of membrane);GO…	04020(Calcium signaling pathway);04080(Neuroactive ligand-receptor interaction);04080(Neuroactive ligand-receptor interaction)	K05216		purinergic receptor P2X, ligand-gated ion channel, 2 [Source:ZFIN;Acc:ZDB-GENE-030319-2]		0.0421945	0.171306	0.049128	0.05528	0.074585	0.132864	0.071357	0.111366	0.034877	0.01067	0.07796	0
ENSDARG00000002304	gins2	ENSDART00000033746	GO:0000727(double-strand break repair via break-induced replication);GO:0000811(GINS complex);GO:0005634(nucleus);GO:0006260(DNA replication);GO:0031298(replication fork protection complex);GO:0032508(DNA duplex unwinding);GO:0043138(3'-5' DNA helicase activity)		K10733		GINS complex subunit 2 [Source:ZFIN;Acc:ZDB-GENE-050419-19]		17.1405	27.7061	4.50445	60.4132	0.46073	2.79228	2.49444	9.7625	0.206853	23.4169	2.99212	1.53155
ENSDARG00000002305	me3	ENSDART00000012385	GO:0004470(malic enzyme activity);GO:0004471(malate dehydrogenase (decarboxylating) (NAD+) activity);GO:0004473(malate dehydrogenase (decarboxylating) (NADP+) activity);GO:0005739(mitochondrion);GO:0006090(pyruvate metabolic process);GO:0006108(malate metabolic process);GO:0016491(oxidoreductase activity);GO:0046872(metal ion binding);GO:0051287(NAD binding);GO:0055114(oxidation-reduction process)	00620(Pyruvate metabolism)	K00029	EC:1.1.1.40	malic enzyme 3, NADP(+)-dependent, mitochondrial [Source:ZFIN;Acc:ZDB-GENE-041111-294]		30.5487	37.4593	23.7322	68.0625	13.2297	40.646	39.9652	19.6895	28.7843	29.5842	34.3712	37.1382
ENSDARG00000002311	fabp11b	ENSDART00000012718	GO:0005575(cellular_component);GO:0008289(lipid binding);GO:0033552(response to vitamin B3);GO:0034694(response to prostaglandin)				fatty acid binding protein 11b [Source:ZFIN;Acc:ZDB-GENE-050522-391]		0	0	0	0.532391	0	0	0	0	0	0.193837	0	0
ENSDARG00000002330	lhx8a	ENSDART00000019078;ENSDART00000144982;ENSDART00000132313	GO:0000977(RNA polymerase II regulatory region sequence-specific DNA binding);GO:0000981(DNA-binding transcription factor activity, RNA polymerase II-specific);GO:0003677(DNA binding);GO:0003700(DNA-binding transcription factor activity);GO:0005634(nucleus);GO:0006355(regulation of transcription, DNA-templated);GO:0021884(forebrain neuron development);GO:0030182(neuron differentiation);GO:0043565…		K09375		LIM homeobox 8a [Source:ZFIN;Acc:ZDB-GENE-031008-2]		14.2705	16.9172	2.26871	39.8258	0.364218	0.933691	0.417722	2.88449	0.164585	13.8774	0.946004	0.254502
ENSDARG00000002332	frmd6	ENSDART00000024386;ENSDART00000138104	GO:0005856(cytoskeleton);GO:0031032(actomyosin structure organization);GO:0031032(actomyosin structure organization)				FERM domain containing 6 [Source:ZFIN;Acc:ZDB-GENE-050522-354]		5.10171	7.68472	4.89239	11.6132	3.50679	7.29521	3.36521	2.98944	3.74105	5.71755	3.1136	4.61613
ENSDARG00000002333	fam102bb	ENSDART00000020183					family with sequence similarity 102 member Bb [Source:ZFIN;Acc:ZDB-GENE-041014-330]		3.60642	2.85814	1.34861	3.70316	1.88243	1.71712	1.34901	3.60128	1.13606	2.79953	0.780041	1.27532
ENSDARG00000002336	dlc	ENSDART00000018514;ENSDART00000148359	GO:0005509(calcium ion binding);GO:0007154(cell communication);GO:0007275(multicellular organism development);GO:0016020(membrane);GO:0016021(integral component of membrane);GO:0016021(integral component of membrane)	04330(Notch signaling pathway);04330(Notch signaling pathway)	K06051		deltaC [Source:ZFIN;Acc:ZDB-GENE-000125-4]		9.41628	4.89515	6.45482	0.92326	13.6889	8.34607	19.2732	30.2718	4.22017	3.29929	6.03931	2.53218
ENSDARG00000002339	sgf29	ENSDART00000007726;ENSDART00000144369;ENSDART00000124063	GO:0000124(SAGA complex);GO:0001135(RNA polymerase II transcription regulator recruiting activity);GO:0005671(Ada2/Gcn5/Ada3 transcription activator complex);GO:0035064(methylated histone binding);GO:0043966(histone H3 acetylation);GO:0051123(RNA polymerase II preinitiation complex assembly);GO:0051123(RNA polymerase II preinitiation complex assembly)		K11364		SAGA complex associated factor 29 [Source:ZFIN;Acc:ZDB-GENE-041010-62]		11.8649	11.5037	4.00309	27.9159	2.60278	6.62579	4.48377	6.74658	3.39403	8.42071	5.01217	2.2289
ENSDARG00000002344	tubb4b	ENSDART00000041279;ENSDART00000147341	GO:0000166(nucleotide binding);GO:0000226(microtubule cytoskeleton organization);GO:0000278(mitotic cell cycle);GO:0003924(GTPase activity);GO:0005200(structural constituent of cytoskeleton);GO:0005525(GTP binding);GO:0005737(cytoplasm);GO:0005856(cytoskeleton);GO:0005874(microtubule);GO:0007017(microtubule-based process);GO:0060271(cilium assembly);GO:0060271(cilium assembly)	04145(Phagosome);04540(Gap junction);04540(Gap junction)	K07375		tubulin, beta 4B class IVb [Source:ZFIN;Acc:ZDB-GENE-030131-8625]		354.736	650.582	504.952	991.613	121.369	130.993	123.126	152.857	70.4244	443.388	106.601	159.295
ENSDARG00000002347	cyp11a1	ENSDART00000154065;ENSDART00000153492;ENSDART00000024866;ENSDART00000154376;ENSDART00000073566	GO:0004497(monooxygenase activity);GO:0005506(iron ion binding);GO:0005739(mitochondrion);GO:0005743(mitochondrial inner membrane);GO:0006629(lipid metabolic process);GO:0006694(steroid biosynthetic process);GO:0006700(C21-steroid hormone biosynthetic process);GO:0006704(glucocorticoid biosynthetic process);GO:0008202(steroid metabolic process);GO:0008203(cholesterol metabolic process);GO:0008207…	00140(Steroid hormone biosynthesis);00140(Steroid hormone biosynthesis)	K00498	EC:1.14.15.6	cytochrome P450, family 11, subfamily A, polypeptide 1 [Source:ZFIN;Acc:ZDB-GENE-010306-1]		24.7104	45.1467	4.09734	103.879	0.0885982	0.962394	0.445085	1.25021	0.449389	43.1382	1.94506	0.36186
ENSDARG00000002353	tagapa	ENSDART00000147557;ENSDART00000177422;ENSDART00000189482	GO:0005096(GTPase activator activity);GO:0007165(signal transduction);GO:0043547(positive regulation of GTPase activity);GO:0043547(positive regulation of GTPase activity)				T cell activation RhoGTPase activating protein a [Source:ZFIN;Acc:ZDB-GENE-040426-1877]		0.860809	0.664062	2.04008	0.115252	1.56706	2.08773	1.4073	1.9367	0.727778	0.199642	2.32297	1.16542
ENSDARG00000002355	shpk	ENSDART00000020044;ENSDART00000156372	GO:0005737(cytoplasm);GO:0005975(carbohydrate metabolic process);GO:0016310(phosphorylation);GO:0016773(phosphotransferase activity, alcohol group as acceptor);GO:0050277(sedoheptulokinase activity);GO:0071222(cellular response to lipopolysaccharide);GO:0071222(cellular response to lipopolysaccharide)				sedoheptulokinase [Source:ZFIN;Acc:ZDB-GENE-060526-357]		0.918204	0.704466	0.169008	0.330425	0.245296	0.203096	0.142494	1.36815	0.10852	0.518668	0.169726	0.212245
ENSDARG00000002362	ubald1a	ENSDART00000153387;ENSDART00000112768	GO:0005515(protein binding);GO:0016020(membrane);GO:0016021(integral component of membrane);GO:0016021(integral component of membrane)				UBA-like domain containing 1a [Source:ZFIN;Acc:ZDB-GENE-040718-191]		9.88221	6.48386	6.85052	6.33408	12.6884	10.414	7.74855	12.0723	6.86544	4.35416	9.21195	7.26931
ENSDARG00000002365	cers5	ENSDART00000011076	GO:0003677(DNA binding);GO:0005634(nucleus);GO:0005783(endoplasmic reticulum);GO:0016020(membrane);GO:0016021(integral component of membrane);GO:0046513(ceramide biosynthetic process);GO:0050291(sphingosine N-acyltransferase activity)	00600(Sphingolipid metabolism)	K04710	EC:2.3.1.24	ceramide synthase 5 [Source:ZFIN;Acc:ZDB-GENE-030131-1740]		8.75365	17.4811	10.2414	21.7444	5.4589	6.16447	5.0248	8.30945	4.04843	9.65316	8.71703	5.81291
ENSDARG00000002369	UBB	ENSDART00000035235	GO:0005515(protein binding);GO:0005634(nucleus);GO:0005737(cytoplasm);GO:0016567(protein ubiquitination);GO:0019941(modification-dependent protein catabolic process);GO:0031386(protein tag);GO:0031625(ubiquitin protein ligase binding)				si:ch211-202a12.4 [Source:ZFIN;Acc:ZDB-GENE-030131-8486]		113.746	298.669	1043.03	392.542	289.398	220.281	112.948	143.006	138.298	144.121	143.504	119.028
ENSDARG00000002377	mief2	ENSDART00000121439;ENSDART00000103626;ENSDART00000141283	GO:0003674(molecular_function);GO:0005515(protein binding);GO:0005575(cellular_component);GO:0005739(mitochondrion);GO:0005741(mitochondrial outer membrane);GO:0008150(biological_process);GO:0042802(identical protein binding);GO:0090141(positive regulation of mitochondrial fission);GO:0090141(positive regulation of mitochondrial fission)				mitochondrial elongation factor 2 [Source:ZFIN;Acc:ZDB-GENE-060929-864]		3.41949	12.4951	18.6182	7.89547	9.25657	5.30616	5.85395	4.35702	7.62151	6.10781	4.13343	5.4653
ENSDARG00000002385	atm	ENSDART00000152725;ENSDART00000002922	GO:0000077(DNA damage checkpoint);GO:0000166(nucleotide binding);GO:0000723(telomere maintenance);GO:0004674(protein serine/threonine kinase activity);GO:0005515(protein binding);GO:0005524(ATP binding);GO:0005634(nucleus);GO:0006281(DNA repair);GO:0006468(protein phosphorylation);GO:0006974(cellular response to DNA damage stimulus);GO:0008630(intrinsic apoptotic signaling pathway in response to …	03440(Homologous recombination);04068(FoxO signaling pathway);04110(Cell cycle);04115(p53 signaling pathway);04210(Apoptosis);04218(Cellular senescence);04218(Cellular senescence)	K04728	EC:2.7.11.1	ATM serine/threonine kinase [Source:ZFIN;Acc:ZDB-GENE-040809-1]		1.79237	3.29541	1.19693	1.36772	1.1045	1.88098	1.47272	2.781	1.08707	2.06533	1.20256	0.908353
ENSDARG00000002391	tlcd1	ENSDART00000027848	GO:0003674(molecular_function);GO:0008150(biological_process);GO:0016020(membrane);GO:0016021(integral component of membrane)				TLC domain containing 1 [Source:ZFIN;Acc:ZDB-GENE-041010-173]		1.83432	2.02012	5.79617	0.294363	8.12292	6.88284	3.07895	2.15158	4.51817	1.07468	16.6251	8.94841
ENSDARG00000002394	ugt5d1	ENSDART00000140308	GO:0008194(UDP-glycosyltransferase activity);GO:0015020(glucuronosyltransferase activity);GO:0016020(membrane);GO:0016021(integral component of membrane);GO:0016740(transferase activity);GO:0016757(transferase activity, transferring glycosyl groups);GO:0016758(transferase activity, transferring hexosyl groups);GO:0043231(intracellular membrane-bounded organelle)				UDP glucuronosyltransferase 5 family, polypeptide D1 [Source:ZFIN;Acc:ZDB-GENE-091118-36]		1.31583	0.290663	0	0.083647	0	0	1.69169	7.23876	0	1.18213	0	0
ENSDARG00000002396	cry-dash	ENSDART00000139329	GO:0003913(DNA photolyase activity);GO:0006281(DNA repair)		K01669	EC:4.1.99.3	cryptochrome DASH [Source:ZFIN;Acc:ZDB-GENE-040617-2]		12.932	24.6558	18.4228	28.9151	7.18816	14.8261	10.3634	6.18907	13.8305	18.5408	15.1795	5.82133
ENSDARG00000002401	gale	ENSDART00000187980;ENSDART00000135569;ENSDART00000136142;ENSDART00000184984;ENSDART00000193661	GO:0003978(UDP-glucose 4-epimerase activity);GO:0005575(cellular_component);GO:0005829(cytosol);GO:0006012(galactose metabolic process);GO:0016853(isomerase activity);GO:0019388(galactose catabolic process);GO:0033499(galactose catabolic process via UDP-galactose);GO:0033499(galactose catabolic process via UDP-galactose)	00052(Galactose metabolism);00520(Amino sugar and nucleotide sugar metabolism);00520(Amino sugar and nucleotide sugar metabolism)	K01784	EC:5.1.3.2	UDP-galactose-4-epimerase [Source:ZFIN;Acc:ZDB-GENE-060421-6479]		6.68579	15.1831	8.4595	16.4749	3.0143	7.52521	1.35101	2.18165	0.915694	9.77436	19.8816	6.81525
ENSDARG00000002402	ercc3	ENSDART00000013066	GO:0003677(DNA binding);GO:0004003(ATP-dependent DNA helicase activity);GO:0005524(ATP binding);GO:0006289(nucleotide-excision repair);GO:0006367(transcription initiation from RNA polymerase II promoter);GO:0016787(hydrolase activity);GO:0032508(DNA duplex unwinding)	03022(Basal transcription factors);03420(Nucleotide excision repair)	K10843	EC:3.6.4.12	excision repair cross-complementation group 3 [Source:ZFIN;Acc:ZDB-GENE-030131-3043]		4.5665	8.28523	10.4569	8.53804	5.1459	6.54683	6.15987	10.2828	3.40724	3.63675	4.98343	4.15064
ENSDARG00000002403	nusap1	ENSDART00000003314	GO:0000226(microtubule cytoskeleton organization);GO:0000281(mitotic cytokinesis);GO:0001755(neural crest cell migration);GO:0003677(DNA binding);GO:0005634(nucleus);GO:0005730(nucleolus);GO:0005737(cytoplasm);GO:0005819(spindle);GO:0005856(cytoskeleton);GO:0005874(microtubule);GO:0005876(spindle microtubule);GO:0007049(cell cycle);GO:0007076(mitotic chromosome condensation);GO:0008017(microtubul…				nucleolar and spindle associated protein 1 [Source:ZFIN;Acc:ZDB-GENE-030827-5]		20.216	43.0542	6.79484	71.1371	1.34361	5.16431	11.3593	25.7945	1.92983	28.3199	5.43146	2.58427
ENSDARG00000002405	si:ch211-225b11	ENSDART00000098682;ENSDART00000147639	GO:0005328(neurotransmitter:sodium symporter activity);GO:0005886(plasma membrane);GO:0006836(neurotransmitter transport);GO:0015293(symporter activity);GO:0016020(membrane);GO:0016021(integral component of membrane);GO:0055085(transmembrane transport);GO:0055085(transmembrane transport)		K05039		si:ch211-225b11.1 [Source:ZFIN;Acc:ZDB-GENE-060531-39]		1.97842	2.50849	4.51716	0.610052	4.27551	4.02396	2.55847	6.24616	2.43775	0.969831	4.6414	4.08131
ENSDARG00000002406	zmynd10	ENSDART00000017413	GO:0005737(cytoplasm);GO:0005815(microtubule organizing center);GO:0005856(cytoskeleton);GO:0005886(plasma membrane);GO:0016020(membrane);GO:0016324(apical plasma membrane);GO:0034451(centriolar satellite);GO:0036158(outer dynein arm assembly);GO:0036159(inner dynein arm assembly);GO:0044458(motile cilium assembly);GO:0046872(metal ion binding);GO:1905505(positive regulation of motile cilium asse…				zinc finger, MYND-type containing 10 [Source:ZFIN;Acc:ZDB-GENE-040426-1218]		0.553964	0.425496	0.331115	0.972954	0	0.075471	2.54711	5.3896	0	0.192315	0.14938	0
ENSDARG00000002411	pde4cb	ENSDART00000139454;ENSDART00000163397;ENSDART00000187046	GO:0004114(3',5'-cyclic-nucleotide phosphodiesterase activity);GO:0004115(3',5'-cyclic-AMP phosphodiesterase activity);GO:0005515(protein binding);GO:0007165(signal transduction);GO:0008081(phosphoric diester hydrolase activity);GO:0016787(hydrolase activity);GO:0046872(metal ion binding);GO:0046872(metal ion binding)		K15309		phosphodiesterase 4C, cAMP-specific b [Source:ZFIN;Acc:ZDB-GENE-030131-4075]		0.438145	0.0915892	0.258139	0.0637399	0.319927	0.466004	0.623249	0.73795	0.260068	0.165328	0.293586	0.27012
ENSDARG00000002445	prdm1a	ENSDART00000017445	GO:0000122(negative regulation of transcription by RNA polymerase II);GO:0000578(embryonic axis specification);GO:0000977(RNA polymerase II regulatory region sequence-specific DNA binding);GO:0003676(nucleic acid binding);GO:0003700(DNA-binding transcription factor activity);GO:0005515(protein binding);GO:0005634(nucleus);GO:0005737(cytoplasm);GO:0007521(muscle cell fate determination);GO:0010629…				PR domain containing 1a, with ZNF domain [Source:ZFIN;Acc:ZDB-GENE-030131-2193]		0.436883	0.710981	1.12193	0.393808	1.3903	1.49386	1.05902	0.911821	1.01849	0.366182	0.655279	0.458639
ENSDARG00000002463	arhgef37	ENSDART00000106039;ENSDART00000187513	GO:0005089(Rho guanyl-nucleotide exchange factor activity);GO:0005515(protein binding);GO:0005737(cytoplasm);GO:0035023(regulation of Rho protein signal transduction);GO:0035023(regulation of Rho protein signal transduction)		K20710		Rho guanine nucleotide exchange factor (GEF) 37 [Source:ZFIN;Acc:ZDB-GENE-100514-3]		0.28756	1.4144	6.67116	1.02233	1.07539	1.21316	0.739456	0.803893	0.650532	0.271539	0.708859	0.488614
ENSDARG00000002467	rdh14b	ENSDART00000025330	GO:0016020(membrane);GO:0016021(integral component of membrane)		K11162	EC:1.1.1.-	retinol dehydrogenase 14b [Source:ZFIN;Acc:ZDB-GENE-030131-6605]		5.33111	5.87604	11.028	8.79898	5.88055	9.09869	5.93014	5.5896	6.93504	3.09097	6.20557	3.07025
ENSDARG00000002479	ercc6l	ENSDART00000015401	GO:0000166(nucleotide binding);GO:0000775(chromosome, centromeric region);GO:0000776(kinetochore);GO:0000777(condensed chromosome kinetochore);GO:0003677(DNA binding);GO:0004386(helicase activity);GO:0005515(protein binding);GO:0005524(ATP binding);GO:0005694(chromosome);GO:0007049(cell cycle);GO:0016539(intein-mediated protein splicing);GO:0016787(hydrolase activity);GO:0051301(cell division)		K20093	EC:3.6.4.12	excision repair cross-complementation group 6-like [Source:ZFIN;Acc:ZDB-GENE-060531-56]		7.11996	9.84408	2.33859	16.7025	1.60061	3.08345	2.07845	4.50446	0.772718	7.04596	3.64084	1.34961
ENSDARG00000002483	wnt7ab	ENSDART00000192762;ENSDART00000081821	GO:0005102(signaling receptor binding);GO:0005109(frizzled binding);GO:0005576(extracellular region);GO:0005615(extracellular space);GO:0007275(multicellular organism development);GO:0016055(Wnt signaling pathway);GO:0030182(neuron differentiation);GO:0045165(cell fate commitment);GO:0045165(cell fate commitment)				wingless-type MMTV integration site family, member 7Ab [Source:ZFIN;Acc:ZDB-GENE-100922-44]		0.077238	0	0	0.041153	0.296905	1.19247	0.246676	0.207028	0.410731	0	0.215125	0.231427
ENSDARG00000002487	noc3l	ENSDART00000028043;ENSDART00000152622;ENSDART00000123511	GO:0003682(chromatin binding);GO:0005634(nucleus);GO:0005730(nucleolus);GO:0007517(muscle organ development);GO:0019216(regulation of lipid metabolic process);GO:0019216(regulation of lipid metabolic process)		K14834		NOC3-like DNA replication regulator [Source:ZFIN;Acc:ZDB-GENE-030131-9878]		13.4961	24.9045	6.45846	31.2074	4.29794	5.22211	3.55985	8.21462	2.40444	17.2331	5.11223	3.66123
ENSDARG00000002494	itgb6	ENSDART00000192872;ENSDART00000160488;ENSDART00000065933	GO:0005178(integrin binding);GO:0005925(focal adhesion);GO:0007155(cell adhesion);GO:0007160(cell-matrix adhesion);GO:0007229(integrin-mediated signaling pathway);GO:0008305(integrin complex);GO:0009986(cell surface);GO:0016020(membrane);GO:0016021(integral component of membrane);GO:0016477(cell migration);GO:0033627(cell adhesion mediated by integrin);GO:0038023(signaling receptor activity);GO:0…	04510(Focal adhesion);04512(ECM-receptor interaction);04810(Regulation of actin cytoskeleton);04810(Regulation of actin cytoskeleton)	K06589		integrin, beta 6 [Source:ZFIN;Acc:ZDB-GENE-100812-2]		3.08778	2.08784	2.02153	3.01699	5.05249	8.9867	5.53641	5.97718	4.17708	1.73635	5.76696	4.11825
ENSDARG00000002506	zgc:92818	ENSDART00000018972;ENSDART00000174258;ENSDART00000174259					zgc:92818 [Source:ZFIN;Acc:ZDB-GENE-040718-217]		23.283	42.4976	18.7293	54.0403	17.3317	15.9356	9.52885	8.51399	11.2096	17.8489	11.7666	17.4076
ENSDARG00000002507	itga10	ENSDART00000011224;ENSDART00000186784;ENSDART00000139859	GO:0007155(cell adhesion);GO:0007229(integrin-mediated signaling pathway);GO:0008305(integrin complex);GO:0016020(membrane);GO:0016021(integral component of membrane);GO:0016021(integral component of membrane)	04510(Focal adhesion);04512(ECM-receptor interaction);04810(Regulation of actin cytoskeleton);04810(Regulation of actin cytoskeleton)	K06586		integrin, alpha 10 [Source:ZFIN;Acc:ZDB-GENE-100922-54]		0.41906	0.137257	1.01637	0.0813108	2.35713	2.49338	0.913747	0.596949	0.889547	0.0974216	2.19796	1.8245
ENSDARG00000002508	ankrd33ab	ENSDART00000023686	GO:0005515(protein binding)				ankyrin repeat domain 33Ab [Source:ZFIN;Acc:ZDB-GENE-100729-1]		0.0200559	0	0	0	0	0	0.0262084	0.052588	0	0.0224208	0	0
ENSDARG00000002509	zgc:153911	ENSDART00000075299	GO:0003674(molecular_function);GO:0005102(signaling receptor binding);GO:0008150(biological_process);GO:0009897(external side of plasma membrane);GO:0016020(membrane);GO:0016021(integral component of membrane);GO:0050776(regulation of immune response);GO:0050852(T cell receptor signaling pathway)				zgc:153911 [Source:ZFIN;Acc:ZDB-GENE-061013-174]		1.72011	6.37908	11.4517	0.686296	3.48586	3.61159	1.95915	1.07535	1.31518	0.739434	6.10458	2.35424
ENSDARG00000002510	dmbx1b	ENSDART00000026693	GO:0003677(DNA binding);GO:0005634(nucleus);GO:0006355(regulation of transcription, DNA-templated);GO:0007275(multicellular organism development);GO:0007346(regulation of mitotic cell cycle);GO:0030901(midbrain development);GO:0043565(sequence-specific DNA binding);GO:0050767(regulation of neurogenesis);GO:0051726(regulation of cell cycle);GO:0060041(retina development in camera-type eye);GO:0061…				diencephalon/mesencephalon homeobox 1b [Source:ZFIN;Acc:ZDB-GENE-050417-97]		0	0.073737	0.076153	0	0	0.047763	0.033694	0.113236	0.152612	0.031372	0.03335	0
ENSDARG00000002523	hsdl2	ENSDART00000155742;ENSDART00000155333;ENSDART00000038888	GO:0005777(peroxisome);GO:0016491(oxidoreductase activity);GO:0055114(oxidation-reduction process);GO:0055114(oxidation-reduction process)				hydroxysteroid dehydrogenase like 2 [Source:ZFIN;Acc:ZDB-GENE-030131-1066]		12.2648	10.9703	18.8112	11.3897	43.6161	14.3387	16.8409	38.3416	13.8718	9.47406	16.3907	18.9744
ENSDARG00000002533	adora2b	ENSDART00000144469;ENSDART00000191749	GO:0001609(G protein-coupled adenosine receptor activity);GO:0001973(adenosine receptor signaling pathway);GO:0004930(G protein-coupled receptor activity);GO:0005886(plasma membrane);GO:0007165(signal transduction);GO:0007186(G protein-coupled receptor signaling pathway);GO:0016020(membrane);GO:0016021(integral component of membrane);GO:0098508(endothelial to hematopoietic transition);GO:1901532(…	04020(Calcium signaling pathway);04080(Neuroactive ligand-receptor interaction);04270(Vascular smooth muscle contraction);04270(Vascular smooth muscle contraction)	K04267		adenosine A2b receptor [Source:ZFIN;Acc:ZDB-GENE-060511-1]		0.113024	0.842426	4.15454	0.0802895	0.15536	0.412439	0.0378642	0.390687	0	0	0	0.0643772
ENSDARG00000002536	tm9sf4	ENSDART00000006765	GO:0005769(early endosome);GO:0016020(membrane);GO:0016021(integral component of membrane);GO:0072657(protein localization to membrane)		K17086		transmembrane 9 superfamily protein member 4 [Source:ZFIN;Acc:ZDB-GENE-040426-1575]		30.3543	47.9124	15.5779	64.2381	14.2643	13.9915	10.4849	15.3906	7.66341	35.7842	19.7817	17.3051
ENSDARG00000002538	smu1a	ENSDART00000098346;ENSDART00000169348;ENSDART00000169567	GO:0005515(protein binding);GO:0005515(protein binding)		K13111		SMU1, DNA replication regulator and spliceosomal factor a [Source:ZFIN;Acc:ZDB-GENE-040426-916]		17.4527	29.3496	11.1383	47.8677	5.7366	7.78511	6.27849	8.75506	4.21157	22.1431	7.61175	6.96125
ENSDARG00000002546	rundc3ab	ENSDART00000137081;ENSDART00000123712					RUN domain containing 3Ab [Source:ZFIN;Acc:ZDB-GENE-040426-842]		9.76088	18.6355	1.31493	5.15093	0.101652	0.519319	1.18755	1.24746	0.146838	1.58766	0.410738	0.297459
ENSDARG00000002549	eif3eb	ENSDART00000023926;ENSDART00000135651;ENSDART00000150052;ENSDART00000150189	GO:0001732(formation of cytoplasmic translation initiation complex);GO:0002183(cytoplasmic translational initiation);GO:0003743(translation initiation factor activity);GO:0005634(nucleus);GO:0005737(cytoplasm);GO:0005852(eukaryotic translation initiation factor 3 complex);GO:0006412(translation);GO:0006413(translational initiation);GO:0016282(eukaryotic 43S preinitiation complex);GO:0033290(eukar…	03013(RNA transport);03013(RNA transport)	K03250		eukaryotic translation initiation factor 3, subunit E, b [Source:ZFIN;Acc:ZDB-GENE-050208-283]		3.22352	4.19399	1.84528	8.18038	1.26755	1.02153	1.45253	2.76769	1.28811	3.23626	0.944102	0.404039
ENSDARG00000002552	mapkapk2a	ENSDART00000027532	GO:0000166(nucleotide binding);GO:0004672(protein kinase activity);GO:0004674(protein serine/threonine kinase activity);GO:0004683(calmodulin-dependent protein kinase activity);GO:0005516(calmodulin binding);GO:0005524(ATP binding);GO:0005634(nucleus);GO:0005737(cytoplasm);GO:0006468(protein phosphorylation);GO:0009931(calcium-dependent protein serine/threonine kinase activity);GO:0016301(kinase …	04010(MAPK signaling pathway);04218(Cellular senescence);04370(VEGF signaling pathway);04625(C-type lectin receptor signaling pathway)	K04443	EC:2.7.11.1	mitogen-activated protein kinase-activated protein kinase 2a [Source:ZFIN;Acc:ZDB-GENE-030131-5532]		19.6223	39.3337	26.8263	41.3873	18.2873	21.4565	13.1164	17.6518	11.7567	19.8251	21.2382	14.5884
ENSDARG00000002564	syngr1a	ENSDART00000003939	GO:0003674(molecular_function);GO:0008150(biological_process);GO:0016020(membrane);GO:0016021(integral component of membrane);GO:0030672(synaptic vesicle membrane);GO:0031594(neuromuscular junction)				synaptogyrin 1a [Source:ZFIN;Acc:ZDB-GENE-041010-169]		0.448533	2.35244	1.77673	5.71013	0.983096	1.09611	0.615536	0.8872	1.26835	2.15718	0.520286	1.14223
ENSDARG00000002571	tmod2	ENSDART00000012164	GO:0005523(tropomyosin binding);GO:0005865(striated muscle thin filament);GO:0006936(muscle contraction);GO:0030016(myofibril);GO:0030036(actin cytoskeleton organization);GO:0030239(myofibril assembly);GO:0048821(erythrocyte development);GO:0051694(pointed-end actin filament capping)		K10370		tropomodulin 2 [Source:ZFIN;Acc:ZDB-GENE-040912-185]		2.08847	2.77476	0.449468	6.28133	1.51257	3.12311	1.24622	3.80866	1.08492	1.80402	2.18217	0.844004
ENSDARG00000002576	cabp5a	ENSDART00000144067	GO:0005509(calcium ion binding)				calcium binding protein 5a [Source:ZFIN;Acc:ZDB-GENE-040426-1655]		0.0845971	0.165601	0	0.695571	0	0	0.252112	0.274823	0.0987333	0.0806016	0.102845	0
ENSDARG00000002582	tbx15	ENSDART00000180257;ENSDART00000004333;ENSDART00000124533	GO:0003677(DNA binding);GO:0003700(DNA-binding transcription factor activity);GO:0005634(nucleus);GO:0006355(regulation of transcription, DNA-templated);GO:0006355(regulation of transcription, DNA-templated)		K10182		T-box 15 [Source:ZFIN;Acc:ZDB-GENE-020529-1]		0.878228	0.191635	0.944342	0.0659148	1.325	3.59812	2.80128	0.678629	2.4921	0.290223	3.34207	2.15565
ENSDARG00000002587	dpysl3	ENSDART00000065097;ENSDART00000138329	GO:0005737(cytoplasm);GO:0007409(axonogenesis);GO:0007411(axon guidance);GO:0010975(regulation of neuron projection development);GO:0016787(hydrolase activity);GO:0016810(hydrolase activity, acting on carbon-nitrogen (but not peptide) bonds);GO:0030334(regulation of cell migration);GO:0030426(growth cone);GO:0042995(cell projection);GO:0048678(response to axon injury);GO:0048936(peripheral nervou…				dihydropyrimidinase-like 3 [Source:ZFIN;Acc:ZDB-GENE-050720-2]		1.11492	0.594837	1.76354	0.428929	3.01267	6.66762	5.90166	5.37137	4.435	0.645293	2.74041	6.23967
ENSDARG00000002589	mylpfb	ENSDART00000135036;ENSDART00000003847	GO:0005509(calcium ion binding);GO:0005575(cellular_component);GO:0005575(cellular_component)	04510(Focal adhesion);04810(Regulation of actin cytoskeleton);04810(Regulation of actin cytoskeleton)	K12758		myosin light chain, phosphorylatable, fast skeletal muscle b [Source:ZFIN;Acc:ZDB-GENE-040912-115]		0.393163	0.286739	0.54097	0.876524	2.74137	0	0.484806	0.534289	0.199958	0.197414	0	0
ENSDARG00000002591	ruvbl1	ENSDART00000011931;ENSDART00000142652	GO:0000166(nucleotide binding);GO:0003678(DNA helicase activity);GO:0004386(helicase activity);GO:0005524(ATP binding);GO:0005634(nucleus);GO:0006281(DNA repair);GO:0006310(DNA recombination);GO:0006974(cellular response to DNA damage stimulus);GO:0016787(hydrolase activity);GO:0031011(Ino80 complex);GO:0032508(DNA duplex unwinding);GO:0035267(NuA4 histone acetyltransferase complex);GO:0043141(AT…	04310(Wnt signaling pathway);04310(Wnt signaling pathway)	K04499		RuvB-like AAA ATPase 1 [Source:ZFIN;Acc:ZDB-GENE-030109-2]		25.8564	46.788	14.6167	79.2672	6.4757	7.05998	10.4374	19.6614	4.67581	33.3912	8.8546	6.64666
ENSDARG00000002593	slc45a2	ENSDART00000030887	GO:0003674(molecular_function);GO:0008506(sucrose:proton symporter activity);GO:0009416(response to light stimulus);GO:0015770(sucrose transport);GO:0016020(membrane);GO:0016021(integral component of membrane);GO:0030318(melanocyte differentiation);GO:0043473(pigmentation);GO:0048066(developmental pigmentation)		K15378		solute carrier family 45, member 2 [Source:ZFIN;Acc:ZDB-GENE-050208-97]		0.342929	1.12214	0.629015	0.206202	0.59989	1.92165	0.262926	0.190085	0.806838	0.143866	0.073058	0.481503
ENSDARG00000002597	pabpc1l	ENSDART00000126848;ENSDART00000134161;ENSDART00000142322;ENSDART00000145011;ENSDART00000183560;ENSDART00000185024	GO:0003676(nucleic acid binding);GO:0003723(RNA binding);GO:0003730(mRNA 3'-UTR binding);GO:0005515(protein binding);GO:0005634(nucleus);GO:0005737(cytoplasm);GO:0005829(cytosol);GO:0008143(poly(A) binding);GO:0008266(poly(U) RNA binding);GO:0010494(cytoplasmic stress granule);GO:0032991(protein-containing complex);GO:1990904(ribonucleoprotein complex);GO:1990904(ribonucleoprotein complex)	03013(RNA transport);03015(mRNA surveillance pathway);03018(RNA degradation);03018(RNA degradation)	K13126		poly(A) binding protein, cytoplasmic 1-like [Source:ZFIN;Acc:ZDB-GENE-030131-5836]		67.4527	112.777	11.9604	250.803	0.139701	0.874336	0.458917	1.04155	0.681644	113.522	3.39605	0.479379
ENSDARG00000002600	pcsk1	ENSDART00000147473	GO:0004252(serine-type endopeptidase activity);GO:0005615(extracellular space);GO:0006508(proteolysis);GO:0008233(peptidase activity);GO:0008236(serine-type peptidase activity);GO:0016020(membrane);GO:0016485(protein processing);GO:0016486(peptide hormone processing);GO:0016787(hydrolase activity);GO:0043005(neuron projection)		K01359	EC:3.4.21.93	proprotein convertase subtilisin/kexin type 1 [Source:ZFIN;Acc:ZDB-GENE-071009-1]		0.0179276	0.0313366	0.0271885	0	0	0.0485171	0.0321456	0.0204706	0	0.0599105	0	0
ENSDARG00000002601	irx7	ENSDART00000011627	GO:0003677(DNA binding);GO:0005634(nucleus);GO:0006355(regulation of transcription, DNA-templated);GO:0010842(retina layer formation);GO:0021575(hindbrain morphogenesis);GO:0030182(neuron differentiation);GO:0030902(hindbrain development);GO:0032330(regulation of chondrocyte differentiation);GO:0043565(sequence-specific DNA binding);GO:0060041(retina development in camera-type eye);GO:0060059(emb…				iroquois homeobox 7 [Source:ZFIN;Acc:ZDB-GENE-020103-1]		0.096824	0.212255	0.140098	0.559679	0	0.103655	0.098579	0.100706	0	0.122302	0	0
ENSDARG00000002607	unm_sa1614	ENSDART00000103507	GO:0005096(GTPase activator activity);GO:0005515(protein binding);GO:0043547(positive regulation of GTPase activity);GO:0046872(metal ion binding)	04144(Endocytosis)	K12488		un-named sa1614 [Source:ZFIN;Acc:ZDB-GENE-120411-1]		0.880135	0.403099	0.721979	0.223082	0.700007	0.597562	0.468455	0.723335	0.38144	0.251917	0.155613	0.154561
ENSDARG00000002609	rnf145a	ENSDART00000004550	GO:0005783(endoplasmic reticulum);GO:0008270(zinc ion binding);GO:0012505(endomembrane system);GO:0016020(membrane);GO:0016021(integral component of membrane);GO:0016567(protein ubiquitination);GO:0046872(metal ion binding);GO:0061630(ubiquitin protein ligase activity)				ring finger protein 145a [Source:ZFIN;Acc:ZDB-GENE-111012-3]		0.226681	0.383409	0.275077	0.338337	0.396552	0.776819	0.616597	0.944263	0.20609	0.261206	0.083751	0.302868
ENSDARG00000002613	rpa3	ENSDART00000018553	GO:0000724(double-strand break repair via homologous recombination);GO:0003677(DNA binding);GO:0003684(damaged DNA binding);GO:0003697(single-stranded DNA binding);GO:0005634(nucleus);GO:0005662(DNA replication factor A complex);GO:0006260(DNA replication);GO:0006281(DNA repair);GO:0006284(base-excision repair);GO:0006289(nucleotide-excision repair);GO:0006298(mismatch repair);GO:0006310(DNA reco…	03030(DNA replication);03420(Nucleotide excision repair);03430(Mismatch repair);03440(Homologous recombination);03460(Fanconi anemia pathway)	K10740		replication protein A3 [Source:ZFIN;Acc:ZDB-GENE-040426-977]		22.1347	49.7948	11.9207	57.2006	2.17452	10.3158	5.99685	11.5689	2.55823	31.0246	8.52386	5.08827
ENSDARG00000002632	anxa11b	ENSDART00000149089;ENSDART00000152846;ENSDART00000149200	GO:0005509(calcium ion binding);GO:0005515(protein binding);GO:0005544(calcium-dependent phospholipid binding);GO:0005737(cytoplasm);GO:0006909(phagocytosis);GO:0008429(phosphatidylethanolamine binding);GO:0032506(cytokinetic process);GO:0044548(S100 protein binding);GO:0048306(calcium-dependent protein binding);GO:0051592(response to calcium ion);GO:0051592(response to calcium ion)		K17095		annexin A11b [Source:ZFIN;Acc:ZDB-GENE-030707-5]		43.5426	27.0341	37.2637	11.5864	44.6074	61.844	23.6157	42.0588	17.8084	12.0278	66.1693	40.5867
ENSDARG00000002634	b4galt1	ENSDART00000162146;ENSDART00000166429	GO:0005975(carbohydrate metabolic process);GO:0008378(galactosyltransferase activity);GO:0016020(membrane);GO:0016021(integral component of membrane);GO:0016757(transferase activity, transferring glycosyl groups);GO:0042074(cell migration involved in gastrulation);GO:0048570(notochord morphogenesis);GO:0048570(notochord morphogenesis)				UDP-Gal:betaGlcNAc beta 1,4- galactosyltransferase, polypeptide 1 [Source:ZFIN;Acc:ZDB-GENE-050417-236]		3.02597	1.35401	2.96251	0.250689	6.72968	7.19015	1.52542	3.27546	2.10926	0.572218	24.6168	5.75804
ENSDARG00000002635	zgc:85722	ENSDART00000005313	GO:0003674(molecular_function);GO:0005575(cellular_component);GO:0008150(biological_process)				zgc:85722 [Source:ZFIN;Acc:ZDB-GENE-040516-7]		0.140442	0.162341	0.808894	0.332223	0.370786	1.20244	0.411756	0.9449	0.144664	0.075515	2.78855	0.822162
ENSDARG00000002642	sh3gl1b	ENSDART00000100491;ENSDART00000169043	GO:0005515(protein binding);GO:0005737(cytoplasm);GO:0006897(endocytosis);GO:0006897(endocytosis)	04144(Endocytosis);04144(Endocytosis)	K11247		SH3-domain GRB2-like 1b [Source:ZFIN;Acc:ZDB-GENE-031001-6]		4.34835	2.57721	3.86545	3.59304	2.29558	4.23854	5.26134	7.60789	3.73253	2.49136	2.26546	5.11394
ENSDARG00000002644	rgs5a	ENSDART00000127612			K16449		regulator of G protein signaling 5a [Source:ZFIN;Acc:ZDB-GENE-030131-7570]		9.16446	5.17363	19.4835	1.44881	24.8595	27.3243	34.9937	18.8814	28.3535	3.65428	27.6299	33.5124
ENSDARG00000002656	stxbp5a	ENSDART00000142806	GO:0005096(GTPase activator activity);GO:0005515(protein binding);GO:0005737(cytoplasm);GO:0005886(plasma membrane);GO:0016021(integral component of membrane);GO:0016192(vesicle-mediated transport);GO:0017137(Rab GTPase binding);GO:0017157(regulation of exocytosis);GO:0019905(syntaxin binding);GO:0031201(SNARE complex);GO:0043547(positive regulation of GTPase activity)		K08518		syntaxin binding protein 5a (tomosyn) [Source:ZFIN;Acc:ZDB-GENE-041001-161]		0.0910735	0.338389	0.199068	0.269271	0.260454	0.2762	0.510089	0.487115	0.191257	0.131185	0.13648	0.192202
ENSDARG00000002659	mapre1b	ENSDART00000133602;ENSDART00000004474;ENSDART00000136740	GO:0005515(protein binding);GO:0005815(microtubule organizing center);GO:0005874(microtubule);GO:0005881(cytoplasmic microtubule);GO:0005886(plasma membrane);GO:0008017(microtubule binding);GO:0031110(regulation of microtubule polymerization or depolymerization);GO:0035371(microtubule plus-end);GO:0035372(protein localization to microtubule);GO:0051010(microtubule plus-end binding);GO:0051225(spi…		K10436		microtubule-associated protein, RP/EB family, member 1b [Source:ZFIN;Acc:ZDB-GENE-040426-2256]		17.3054	30.6232	22.6092	28.8642	15.1421	11.6501	15.0191	20.3573	5.07766	16.8061	10.8702	12.0492
ENSDARG00000002663	optn	ENSDART00000014036;ENSDART00000133616	GO:0005794(Golgi apparatus);GO:0006914(autophagy);GO:0016192(vesicle-mediated transport);GO:0031410(cytoplasmic vesicle);GO:0070530(K63-linked polyubiquitin modification-dependent protein binding);GO:0070530(K63-linked polyubiquitin modification-dependent protein binding)	04137(Mitophagy - animal);04137(Mitophagy - animal)	K19946		optineurin [Source:ZFIN;Acc:ZDB-GENE-030131-8103]		12.6932	24.8707	51.3269	4.58253	32.2486	25.2362	16.1698	17.8941	9.41955	5.35777	27.6101	16.794
ENSDARG00000002666	kcnj1b	ENSDART00000019267	GO:0005242(inward rectifier potassium channel activity);GO:0005244(voltage-gated ion channel activity);GO:0006811(ion transport);GO:0006813(potassium ion transport);GO:0016020(membrane);GO:0016021(integral component of membrane);GO:0034765(regulation of ion transmembrane transport);GO:1990573(potassium ion import across plasma membrane)		K04995		potassium inwardly-rectifying channel, subfamily J, member 1b [Source:ZFIN;Acc:ZDB-GENE-070620-9]		0.874175	1.08515	0.097833	0.085075	0.036073	0.188908	0.405829	1.02712	0.243	0.771377	0	0.237761
ENSDARG00000002670	ATG14	ENSDART00000018683;ENSDART00000097274	GO:0000045(autophagosome assembly);GO:0000423(mitophagy);GO:0005776(autophagosome);GO:0009267(cellular response to starvation);GO:0034045(phagophore assembly site membrane);GO:0035032(phosphatidylinositol 3-kinase complex, class III);GO:0043552(positive regulation of phosphatidylinositol 3-kinase activity);GO:0044233(mitochondria-associated endoplasmic reticulum membrane);GO:0097629(extrinsic com…	04140(Autophagy - animal);04140(Autophagy - animal)	K17889		zgc:113944 [Source:ZFIN;Acc:ZDB-GENE-050913-155]		7.45046	14.1354	45.0904	11.0349	13.3322	6.52005	6.33822	10.0608	4.67394	6.1525	4.99421	3.94462
ENSDARG00000002682	tbcela	ENSDART00000185548;ENSDART00000138166;ENSDART00000135770;ENSDART00000006910;ENSDART00000141015	GO:0005515(protein binding);GO:0008150(biological_process);GO:0008150(biological_process)				tubulin folding cofactor E-like a [Source:ZFIN;Acc:ZDB-GENE-040426-1719]		5.00994	2.81945	5.03963	1.70824	4.33034	3.21797	4.83755	10.2557	1.30116	2.12681	2.01238	1.17983
ENSDARG00000002685	fam113	ENSDART00000012483;ENSDART00000179766;ENSDART00000180892;ENSDART00000131530;ENSDART00000139455	GO:0005575(cellular_component);GO:0016788(hydrolase activity, acting on ester bonds);GO:0016788(hydrolase activity, acting on ester bonds)				family with sequence similarity 113 [Source:ZFIN;Acc:ZDB-GENE-041212-23]		15.7661	22.7057	2.38106	53.8024	0.0726217	0.218914	1.11872	2.54448	0.236567	21.8375	0.858669	0.0772779
ENSDARG00000002690	rabif	ENSDART00000141730;ENSDART00000146838;ENSDART00000115356;ENSDART00000142327	GO:0005085(guanyl-nucleotide exchange factor activity);GO:0005829(cytosol);GO:0006892(post-Golgi vesicle-mediated transport);GO:0007264(small GTPase mediated signal transduction);GO:0008270(zinc ion binding);GO:0016020(membrane);GO:0016020(membrane)		K19952		RAB interacting factor [Source:ZFIN;Acc:ZDB-GENE-040718-216]		5.88537	10.3671	3.40811	11.0577	3.37552	2.32245	5.38205	10.8847	1.04194	6.44361	3.18587	2.53046
ENSDARG00000002696	gnb3b	ENSDART00000005547;ENSDART00000151093;ENSDART00000151787;ENSDART00000151246	GO:0005515(protein binding);GO:0007165(signal transduction);GO:0007165(signal transduction)	04371(Apelin signaling pathway);04371(Apelin signaling pathway)	K07825		guanine nucleotide binding protein (G protein), beta polypeptide 3b [Source:ZFIN;Acc:ZDB-GENE-040426-2280]		0.191382	0.502652	0.0870488	0.127346	0	0	0	0.0452455	0	0.219046	0	0
ENSDARG00000002701	rasl12	ENSDART00000018801;ENSDART00000172804;ENSDART00000115054;ENSDART00000180808	GO:0000166(nucleotide binding);GO:0003924(GTPase activity);GO:0005525(GTP binding);GO:0007165(signal transduction);GO:0016020(membrane);GO:0016020(membrane)		K07854		RAS-like, family 12 [Source:ZFIN;Acc:ZDB-GENE-040426-1201]		0.125725	0.0455553	1.32741	0	0.352339	1.19082	0.876433	0.554462	0.983335	0.0314661	0.536049	0.673832
ENSDARG00000002707	her11	ENSDART00000026907	GO:0000122(negative regulation of transcription by RNA polymerase II);GO:0000977(RNA polymerase II regulatory region sequence-specific DNA binding);GO:0001756(somitogenesis);GO:0003677(DNA binding);GO:0003714(transcription corepressor activity);GO:0005515(protein binding);GO:0005634(nucleus);GO:0007219(Notch signaling pathway);GO:0008134(transcription factor binding);GO:0030154(cell differentiati…				hairy-related 11 [Source:ZFIN;Acc:ZDB-GENE-040824-4]		0.508949	0.757845	0.04754	0.459723	0.216731	0	0.046119	0.25012	0	0.332578	0.112528	0
ENSDARG00000002710	ncl	ENSDART00000124698;ENSDART00000130171;ENSDART00000017188;ENSDART00000147402;ENSDART00000141088	GO:0001947(heart looping);GO:0003676(nucleic acid binding);GO:0003723(RNA binding);GO:0003729(mRNA binding);GO:0005634(nucleus);GO:0005737(cytoplasm);GO:0006364(rRNA processing);GO:0009303(rRNA transcription);GO:0071014(post-mRNA release spliceosomal complex);GO:1990904(ribonucleoprotein complex);GO:2000815(regulation of mRNA stability involved in response to oxidative stress);GO:2000815(regulati…		K11294		nucleolin [Source:ZFIN;Acc:ZDB-GENE-030131-6986]		163.313	251.692	122.405	364.001	66.6314	75.6112	59.0725	97.6764	48.2257	182.489	63.5041	55.4804
ENSDARG00000002720	utp15	ENSDART00000127397;ENSDART00000148774	GO:0005515(protein binding);GO:0005634(nucleus);GO:0005730(nucleolus);GO:0006364(rRNA processing);GO:0045766(positive regulation of angiogenesis);GO:0045766(positive regulation of angiogenesis)	03008(Ribosome biogenesis in eukaryotes);03008(Ribosome biogenesis in eukaryotes)	K14549		utp15, U3 small nucleolar ribonucleoprotein, homolog [Source:ZFIN;Acc:ZDB-GENE-030131-3831]		18.9029	39.2946	12.7212	57.6091	4.53316	4.30418	4.36921	6.54047	2.99726	26.6326	4.3655	2.91249
ENSDARG00000002731	sdc2	ENSDART00000141437	GO:0002040(sprouting angiogenesis);GO:0009986(cell surface);GO:0016020(membrane);GO:0016021(integral component of membrane);GO:0016477(cell migration);GO:0048565(digestive tract development);GO:0055113(epiboly involved in gastrulation with mouth forming second);GO:0060973(cell migration involved in heart development);GO:0070121(Kupffer's vesicle development);GO:0097435(supramolecular fiber organi…	04514(Cell adhesion molecules (CAMs))	K16336		syndecan 2 [Source:ZFIN;Acc:ZDB-GENE-021206-3]		37.0243	55.4394	31.8139	27.6204	21.496	19.2441	16.3946	48.6913	14.7125	23.1729	9.97401	20.0729
ENSDARG00000002732	spon2b	ENSDART00000054590;ENSDART00000010148	GO:0003674(molecular_function);GO:0007155(cell adhesion);GO:0031012(extracellular matrix);GO:0031012(extracellular matrix)				spondin 2b, extracellular matrix protein [Source:ZFIN;Acc:ZDB-GENE-990415-161]		1.59932	0.327045	0.922306	0.438989	5.22603	9.71222	6.42019	2.00815	4.44516	1.00889	0.752247	10.2339
ENSDARG00000002745	tdh	ENSDART00000147105;ENSDART00000132928;ENSDART00000025509;ENSDART00000152380;ENSDART00000152778	GO:0003824(catalytic activity);GO:0050662(coenzyme binding);GO:0050662(coenzyme binding)	00260(Glycine, serine and threonine metabolism);00260(Glycine, serine and threonine metabolism)	K15789	EC:1.1.1.103	L-threonine dehydrogenase [Source:ZFIN;Acc:ZDB-GENE-040426-2379]		44.7169	144.314	69.9996	36.3722	135.068	111.01	61.1493	56.257	122.54	17.9151	89.8539	35.3747
ENSDARG00000002748	sema6d	ENSDART00000136361	GO:0001755(neural crest cell migration);GO:0005515(protein binding);GO:0005615(extracellular space);GO:0005887(integral component of plasma membrane);GO:0016020(membrane);GO:0016021(integral component of membrane);GO:0030215(semaphorin receptor binding);GO:0030335(positive regulation of cell migration);GO:0038191(neuropilin binding);GO:0045499(chemorepellent activity);GO:0048843(negative regulati…				sema domain, transmembrane domain (TM), and cytoplasmic domain, (semaphorin) 6D [Source:ZFIN;Acc:ZDB-GENE-040426-1933]		6.02239	9.15012	2.26477	23.8791	1.92496	5.20204	7.48106	17.7467	2.87737	7.51653	1.59596	1.84302
ENSDARG00000002750	phf20a	ENSDART00000123263	GO:0003676(nucleic acid binding);GO:0005634(nucleus);GO:0006355(regulation of transcription, DNA-templated);GO:0046872(metal ion binding);GO:0071339(MLL1 complex)		K18402		PHD finger protein 20, a [Source:ZFIN;Acc:ZDB-GENE-070912-270]		0.4764	0.715331	0.823815	1.82494	0.39429	0.704613	0.597947	1.444	0.526303	0.520896	0.554256	0.536751
ENSDARG00000002754	pdcd2l	ENSDART00000003346	GO:0003674(molecular_function);GO:0005737(cytoplasm);GO:1902262(apoptotic process involved in blood vessel morphogenesis)		K14801		programmed cell death 2-like [Source:ZFIN;Acc:ZDB-GENE-040426-967]		6.82118	13.4006	4.64804	19.6578	2.04877	1.37976	1.56668	3.88734	1.72589	10.7341	2.52045	1.22418
ENSDARG00000002758	dedd1	ENSDART00000065467;ENSDART00000128762;ENSDART00000145839;ENSDART00000139760	GO:0003677(DNA binding);GO:0005515(protein binding);GO:0005730(nucleolus);GO:0006915(apoptotic process);GO:0008625(extrinsic apoptotic signaling pathway via death domain receptors);GO:0042981(regulation of apoptotic process);GO:0042981(regulation of apoptotic process)				death effector domain-containing 1 [Source:ZFIN;Acc:ZDB-GENE-000616-2]		15.0548	8.23783	13.2208	15.2639	17.2307	13.6133	15.7495	35.068	13.252	7.90204	33.4155	8.71181
ENSDARG00000002760	gdf5	ENSDART00000149343;ENSDART00000015051	GO:0005125(cytokine activity);GO:0005160(transforming growth factor beta receptor binding);GO:0005576(extracellular region);GO:0005615(extracellular space);GO:0008083(growth factor activity);GO:0010469(regulation of signaling receptor activity);GO:0010862(positive regulation of pathway-restricted SMAD protein phosphorylation);GO:0030509(BMP signaling pathway);GO:0042981(regulation of apoptotic pr…	04060(Cytokine-cytokine receptor interaction);04350(TGF-beta signaling pathway);04350(TGF-beta signaling pathway)	K04664		growth differentiation factor 5 [Source:ZFIN;Acc:ZDB-GENE-990415-39]		0.140817	0.146851	0.0975702	0.466224	0.0841685	0.177914	0.0220255	0.0409425	0	0	0	0.0238073
ENSDARG00000002764	miox	ENSDART00000140752	GO:0005506(iron ion binding);GO:0005737(cytoplasm);GO:0019310(inositol catabolic process);GO:0050113(inositol oxygenase activity);GO:0055114(oxidation-reduction process)	00053(Ascorbate and aldarate metabolism);00562(Inositol phosphate metabolism)	K00469	EC:1.13.99.1	myo-inositol oxygenase [Source:ZFIN;Acc:ZDB-GENE-050913-113]		0.973637	0.716813	0.032986	0	0.095694	0.082951	0.422486	12.785	0	3.28925	0.079498	0.076353
ENSDARG00000002768	pvalb2	ENSDART00000010144;ENSDART00000143534	GO:0005509(calcium ion binding);GO:0005634(nucleus);GO:0005737(cytoplasm);GO:0046872(metal ion binding);GO:0046872(metal ion binding)				parvalbumin 2 [Source:ZFIN;Acc:ZDB-GENE-000322-4]		2070.21	1181.58	4967.81	283.861	4320.74	10914.6	5152.76	1058.31	5882.76	1279.13	8124.83	10967.2
ENSDARG00000002771	si:ch211-48m9	ENSDART00000042002	GO:0005452(inorganic anion exchanger activity);GO:0005887(integral component of plasma membrane);GO:0006811(ion transport);GO:0006820(anion transport);GO:0008509(anion transmembrane transporter activity);GO:0008510(sodium:bicarbonate symporter activity);GO:0015698(inorganic anion transport);GO:0015701(bicarbonate transport);GO:0016020(membrane);GO:0016021(integral component of membrane);GO:005145…		K13857		si:ch211-48m9.1 [Source:ZFIN;Acc:ZDB-GENE-060531-64]		0.116269	0.0949674	0.0315898	0.0366046	0.140906	0.0656036	0.0345015	0.127443	0.117394	0.0339058	0.103351	0.0948854
ENSDARG00000002779	pdx1	ENSDART00000014696	GO:0000978(RNA polymerase II proximal promoter sequence-specific DNA binding);GO:0003309(type B pancreatic cell differentiation);GO:0003677(DNA binding);GO:0003700(DNA-binding transcription factor activity);GO:0005634(nucleus);GO:0006355(regulation of transcription, DNA-templated);GO:0031016(pancreas development);GO:0031018(endocrine pancreas development);GO:0035469(determination of pancreatic le…		K07594		pancreatic and duodenal homeobox 1 [Source:ZFIN;Acc:ZDB-GENE-990415-122]		1.87261	2.05918	0.638096	1.99851	0.792641	0	0.235511	0.808512	0	1.58772	0.113716	0
ENSDARG00000002787	tle3a	ENSDART00000045679;ENSDART00000100632	GO:0005515(protein binding);GO:0005634(nucleus);GO:0006355(regulation of transcription, DNA-templated);GO:0006355(regulation of transcription, DNA-templated)	04310(Wnt signaling pathway);04330(Notch signaling pathway);04330(Notch signaling pathway)	K04497		TLE family member 3, transcriptional corepressor a [Source:ZFIN;Acc:ZDB-GENE-990415-86]		10.2993	17.996	6.84672	28.4802	3.46424	4.94371	3.89113	5.24439	3.73108	11.5275	6.11454	3.76052
ENSDARG00000002790	ap2m1a	ENSDART00000046587;ENSDART00000012442;ENSDART00000165548;ENSDART00000138472;ENSDART00000139499	GO:0005886(plasma membrane);GO:0005905(clathrin-coated pit);GO:0006886(intracellular protein transport);GO:0006897(endocytosis);GO:0008289(lipid binding);GO:0015031(protein transport);GO:0016020(membrane);GO:0016055(Wnt signaling pathway);GO:0016192(vesicle-mediated transport);GO:0030131(clathrin adaptor complex);GO:0030131(clathrin adaptor complex)	04144(Endocytosis);04144(Endocytosis)	K11826		adaptor related protein complex 2 subunit mu 1a [Source:ZFIN;Acc:ZDB-GENE-030131-9784]		43.4234	45.0584	38.9	39.2047	45.9667	41.9222	32.8943	47.5393	23.8229	27.1614	29.0873	30.0636
ENSDARG00000002791	atp1a1a	ENSDART00000081047;ENSDART00000147682;ENSDART00000136381;ENSDART00000132968	GO:0000166(nucleotide binding);GO:0002027(regulation of heart rate);GO:0003143(embryonic heart tube morphogenesis);GO:0005391(sodium:potassium-exchanging ATPase activity);GO:0005524(ATP binding);GO:0005887(integral component of plasma membrane);GO:0006811(ion transport);GO:0006813(potassium ion transport);GO:0006883(cellular sodium ion homeostasis);GO:0007368(determination of left/right symmetry)…	04260(Cardiac muscle contraction);04261(Adrenergic signaling in cardiomyocytes);04261(Adrenergic signaling in cardiomyocytes)	K01539	EC:7.2.2.13	ATPase Na+/K+ transporting subunit alpha 1a, tandem duplicate 1 [Source:ZFIN;Acc:ZDB-GENE-001212-1]		65.969	122.86	67.5672	127.269	16.9791	24.1354	36.7518	74.8794	14.3515	63.5295	27.6584	17.8395
ENSDARG00000002792	arcn1a	ENSDART00000014666	GO:0000139(Golgi membrane);GO:0005737(cytoplasm);GO:0005794(Golgi apparatus);GO:0005829(cytosol);GO:0006888(endoplasmic reticulum to Golgi vesicle-mediated transport);GO:0006890(retrograde vesicle-mediated transport, Golgi to endoplasmic reticulum);GO:0015031(protein transport);GO:0016020(membrane);GO:0016192(vesicle-mediated transport);GO:0030126(COPI vesicle coat);GO:0030137(COPI-coated vesicle…		K20471		archain 1a [Source:ZFIN;Acc:ZDB-GENE-021031-2]		22.9363	31.5086	13.578	46.6086	9.10302	13.1678	7.14061	10.2244	5.03591	21.8778	20.5983	12.7551
ENSDARG00000002795	meis3	ENSDART00000155128	GO:0003677(DNA binding);GO:0005515(protein binding);GO:0005634(nucleus);GO:0005737(cytoplasm);GO:0006355(regulation of transcription, DNA-templated);GO:0030902(hindbrain development);GO:0031016(pancreas development);GO:0031017(exocrine pancreas development);GO:0035066(positive regulation of histone acetylation);GO:0043565(sequence-specific DNA binding);GO:0045893(positive regulation of transcript…		K16671		myeloid ecotropic viral integration site 3 [Source:ZFIN;Acc:ZDB-GENE-010406-2]		0.287282	0.426396	0.260681	0.576853	0.357473	0.427656	0.617288	1.2243	0.359357	0.24796	0.031764	0.411892
ENSDARG00000002797	BX908804	ENSDART00000056021	GO:0003950(NAD+ ADP-ribosyltransferase activity);GO:0003956(NAD(P)+-protein-arginine ADP-ribosyltransferase activity);GO:0006471(protein ADP-ribosylation);GO:0016740(transferase activity);GO:0016757(transferase activity, transferring glycosyl groups);GO:0018120(peptidyl-arginine ADP-ribosylation)						0.200556	0.055514	0	0.020599	0	0	0.020242	0.601479	0.050814	0.011699	0	0
ENSDARG00000002798	cog8	ENSDART00000013150	GO:0000139(Golgi membrane);GO:0005794(Golgi apparatus);GO:0006891(intra-Golgi vesicle-mediated transport);GO:0015031(protein transport);GO:0016020(membrane);GO:0017119(Golgi transport complex)		K20295		component of oligomeric golgi complex 8 [Source:ZFIN;Acc:ZDB-GENE-050320-74]		5.76157	11.2838	6.70819	19.7751	3.73197	4.08237	2.16617	4.1206	2.35884	7.58697	4.39592	3.02105
ENSDARG00000002816	rasgrf2b	ENSDART00000083350	GO:0005085(guanyl-nucleotide exchange factor activity);GO:0005089(Rho guanyl-nucleotide exchange factor activity);GO:0005515(protein binding);GO:0005516(calmodulin binding);GO:0005622(intracellular);GO:0005737(cytoplasm);GO:0005783(endoplasmic reticulum);GO:0005789(endoplasmic reticulum membrane);GO:0005886(plasma membrane);GO:0007264(small GTPase mediated signal transduction);GO:0016020(membrane…	04010(MAPK signaling pathway)	K12326		Ras protein-specific guanine nucleotide-releasing factor 2b [Source:ZFIN;Acc:ZDB-GENE-060504-1]		0.035775	0.058312	0	0	0.015393	0.054391	0.099899	0.39652	0	0.01124	0	0.053645
ENSDARG00000002826	cep57l1	ENSDART00000048537;ENSDART00000153405;ENSDART00000152984	GO:0005813(centrosome);GO:0008017(microtubule binding);GO:0042802(identical protein binding);GO:0043015(gamma-tubulin binding);GO:0043015(gamma-tubulin binding)		K16762		centrosomal protein 57, like 1 [Source:ZFIN;Acc:ZDB-GENE-040808-27]		9.00964	17.3466	2.61716	33.0458	1.22143	2.73825	1.95899	4.2833	1.02792	15.1409	3.64477	1.42272
ENSDARG00000002830	trmt2a	ENSDART00000046384;ENSDART00000182975;ENSDART00000142798	GO:0001510(RNA methylation);GO:0003676(nucleic acid binding);GO:0003723(RNA binding);GO:0005575(cellular_component);GO:0006396(RNA processing);GO:0008168(methyltransferase activity);GO:0008173(RNA methyltransferase activity);GO:0016740(transferase activity);GO:0032259(methylation);GO:0032259(methylation)		K15332	EC:2.1.1.-	tRNA methyltransferase 2 homolog A [Source:ZFIN;Acc:ZDB-GENE-030131-6876]		11.377	20.5669	2.97147	32.368	1.21423	3.92552	1.83501	2.88737	0.842244	15.114	1.52319	1.95984
ENSDARG00000002831	col4a4	ENSDART00000154476;ENSDART00000186765	GO:0005201(extracellular matrix structural constituent);GO:0005581(collagen trimer);GO:0005588(collagen type V trimer);GO:0005615(extracellular space);GO:0007155(cell adhesion);GO:0008201(heparin binding);GO:0030198(extracellular matrix organization);GO:0030199(collagen fibril organization);GO:0031012(extracellular matrix);GO:0031012(extracellular matrix)				collagen, type IV, alpha 4 [Source:ZFIN;Acc:ZDB-GENE-101001-1]		0.171245	0.157593	0.036057	0.325268	0.027753	0.023202	0.037754	0.214576	0.016787	0.079548	0.025311	0.031954
ENSDARG00000002840	si:dkey-28b4	ENSDART00000133210;ENSDART00000193926	GO:0000166(nucleotide binding);GO:0005388(calcium-transporting ATPase activity);GO:0005524(ATP binding);GO:0006811(ion transport);GO:0006816(calcium ion transport);GO:0006874(cellular calcium ion homeostasis);GO:0008553(proton-exporting ATPase activity, phosphorylative mechanism);GO:0016020(membrane);GO:0016021(integral component of membrane);GO:0016787(hydrolase activity);GO:0033017(sarcoplasmic…	04020(Calcium signaling pathway);04020(Calcium signaling pathway)	K05853	EC:7.2.2.10	si:dkey-28b4.8 [Source:ZFIN;Acc:ZDB-GENE-090501-2]		2.9133	3.12781	2.36667	0.87586	1.0868	2.11495	6.64504	13.849	1.46725	1.36123	1.20455	1.12025
ENSDARG00000002847	fndc1	ENSDART00000014163;ENSDART00000136039	GO:0005515(protein binding);GO:0005515(protein binding)				fibronectin type III domain containing 1 [Source:ZFIN;Acc:ZDB-GENE-041210-332]		1.34375	0.180077	0.542733	0.334586	0.83668	3.77043	4.11235	2.59868	3.03837	0.464749	1.51983	8.58143
ENSDARG00000002872	zgc:113210	ENSDART00000138018	GO:0008150(biological_process)				zgc:113210 [Source:ZFIN;Acc:ZDB-GENE-050320-83]		1.97046	3.492	0.849252	5.96324	0.82252	1.14569	1.74623	3.35365	0.962877	1.58355	0.956856	0.703906
ENSDARG00000002877	reps1	ENSDART00000132132;ENSDART00000153003	GO:0005509(calcium ion binding);GO:0005515(protein binding);GO:0006898(receptor-mediated endocytosis);GO:0006898(receptor-mediated endocytosis)		K20068		RALBP1 associated Eps domain containing 1 [Source:ZFIN;Acc:ZDB-GENE-030131-9536]		7.44347	12.9588	7.20881	16.0111	6.56727	5.62768	4.11396	5.66056	3.82153	7.26953	4.00138	3.51172
ENSDARG00000002880	vps50	ENSDART00000110699;ENSDART00000146468	GO:0005829(cytosol);GO:0032456(endocytic recycling);GO:0042147(retrograde transport, endosome to Golgi);GO:1990745(EARP complex);GO:1990745(EARP complex)		K23288		VPS50 EARP/GARPII complex subunit [Source:ZFIN;Acc:ZDB-GENE-060503-325]		3.38576	4.01262	2.31251	4.08489	2.17682	3.58289	0.807656	3.15509	1.35848	2.46071	2.35626	1.20363
ENSDARG00000002894	aven	ENSDART00000019759;ENSDART00000147064	GO:0003674(molecular_function);GO:0003674(molecular_function)				apoptosis, caspase activation inhibitor [Source:ZFIN;Acc:ZDB-GENE-041001-171]		6.86817	9.98407	4.79059	13.2696	2.75202	3.68984	3.87102	5.11988	3.31095	8.16617	3.64672	2.61387
ENSDARG00000002897	si:ch211-160o17	ENSDART00000008133;ENSDART00000168203	GO:0004441(inositol-1,4-bisphosphate 1-phosphatase activity);GO:0046854(phosphatidylinositol phosphorylation);GO:0046855(inositol phosphate dephosphorylation);GO:0046855(inositol phosphate dephosphorylation)	00562(Inositol phosphate metabolism);04070(Phosphatidylinositol signaling system);04070(Phosphatidylinositol signaling system)	K01107	EC:3.1.3.57	si:ch211-160o17.2 [Source:ZFIN;Acc:ZDB-GENE-141219-3]		3.55477	2.14359	2.60084	0.544104	1.8698	2.12586	2.01696	2.45222	2.47352	1.60664	0.900625	1.4004
ENSDARG00000002909	tjp3	ENSDART00000012336;ENSDART00000137995;ENSDART00000147070;ENSDART00000139911	GO:0005515(protein binding);GO:0005923(bicellular tight junction);GO:0030104(water homeostasis);GO:0048871(multicellular organismal homeostasis);GO:0048871(multicellular organismal homeostasis)	04530(Tight junction);04530(Tight junction)	K06097		tight junction protein 3 [Source:ZFIN;Acc:ZDB-GENE-030828-10]		13.1575	22.9182	11.0496	34.4519	10.9837	15.8716	8.37386	13.5221	7.43382	15.8005	18.6217	8.65928
ENSDARG00000002912	adipor1a	ENSDART00000131976;ENSDART00000082761;ENSDART00000186283	GO:0005886(plasma membrane);GO:0016020(membrane);GO:0016021(integral component of membrane);GO:0033211(adiponectin-activated signaling pathway);GO:0038023(signaling receptor activity);GO:0038023(signaling receptor activity)	04920(Adipocytokine signaling pathway);04920(Adipocytokine signaling pathway)	K07297		adiponectin receptor 1a [Source:ZFIN;Acc:ZDB-GENE-040718-169]		27.4534	39.6613	22.7219	67.3581	11.601	8.58469	6.08358	7.82902	4.71876	27.1023	6.66136	5.00932
ENSDARG00000002916	sec31b	ENSDART00000153126;ENSDART00000014190;ENSDART00000153110;ENSDART00000152895	GO:0000139(Golgi membrane);GO:0005198(structural molecule activity);GO:0005515(protein binding);GO:0006886(intracellular protein transport);GO:0006888(endoplasmic reticulum to Golgi vesicle-mediated transport);GO:0007029(endoplasmic reticulum organization);GO:0030127(COPII vesicle coat);GO:0070971(endoplasmic reticulum exit site);GO:0090110(COPII-coated vesicle cargo loading);GO:0090114(COPII-coa…	04141(Protein processing in endoplasmic reticulum);04141(Protein processing in endoplasmic reticulum)	K14005		SEC31 homolog B, COPII coat complex component [Source:ZFIN;Acc:ZDB-GENE-060418-2]		10.5281	15.368	4.49032	16.8847	1.99178	2.58361	0.979856	3.12271	1.53053	7.94609	2.38668	1.06468
ENSDARG00000002917	gls2b	ENSDART00000147580;ENSDART00000031005	GO:0004359(glutaminase activity);GO:0005515(protein binding);GO:0006541(glutamine metabolic process);GO:0006541(glutamine metabolic process)				glutaminase 2b (liver, mitochondrial) [Source:ZFIN;Acc:ZDB-GENE-050208-408]		5.24714	28.1637	18.3134	0.252923	18.346	13.1993	5.75115	5.94122	14.8987	1.17499	10.3956	5.67365
ENSDARG00000002933	gbx2	ENSDART00000015333	GO:0000977(RNA polymerase II regulatory region sequence-specific DNA binding);GO:0000981(DNA-binding transcription factor activity, RNA polymerase II-specific);GO:0001228(DNA-binding transcription activator activity, RNA polymerase II-specific);GO:0003677(DNA binding);GO:0005634(nucleus);GO:0006355(regulation of transcription, DNA-templated);GO:0006357(regulation of transcription by RNA polymeras…		K09321		gastrulation brain homeobox 2 [Source:ZFIN;Acc:ZDB-GENE-020509-2]		0.099299	0.730861	0.189812	0.779721	0	0.064973	0.057907	0	0.053771	1.09827	0.031315	0
ENSDARG00000002937	meis1a	ENSDART00000146352;ENSDART00000028018;ENSDART00000139705;ENSDART00000150433	GO:0003677(DNA binding);GO:0005634(nucleus);GO:0006355(regulation of transcription, DNA-templated);GO:0007420(brain development);GO:0007420(brain development)				Meis homeobox 1 a [Source:ZFIN;Acc:ZDB-GENE-020122-3]		1.55181	1.96791	2.67457	1.18113	4.64974	4.6432	4.60368	4.16249	2.96631	0.756068	3.75006	4.3348
ENSDARG00000002945	bgnb	ENSDART00000049836;ENSDART00000145464;ENSDART00000132095	GO:0005515(protein binding);GO:0005515(protein binding)		K08118		biglycan b [Source:ZFIN;Acc:ZDB-GENE-040426-21]		2.26762	1.09273	1.2322	2.50788	2.65635	4.89516	3.55854	5.27404	1.71786	1.80727	1.39943	2.54828
ENSDARG00000002947	abcd3b	ENSDART00000005643	GO:0000166(nucleotide binding);GO:0005324(long-chain fatty acid transporter activity);GO:0005524(ATP binding);GO:0005777(peroxisome);GO:0015910(long-chain fatty acid import into peroxisome);GO:0016020(membrane);GO:0016021(integral component of membrane);GO:0016887(ATPase activity);GO:0042626(ATPase activity, coupled to transmembrane movement of substances);GO:0042803(protein homodimerization acti…				ATP-binding cassette, sub-family D (ALD), member 3b [Source:ZFIN;Acc:ZDB-GENE-050517-29]		3.56962	3.86629	4.47143	3.34086	6.11021	6.05967	4.10588	4.24307	2.8305	3.29326	5.64647	4.15409
ENSDARG00000002949	ppp6c	ENSDART00000007458;ENSDART00000136124	GO:0001878(response to yeast);GO:0004721(phosphoprotein phosphatase activity);GO:0005575(cellular_component);GO:0006470(protein dephosphorylation);GO:0016787(hydrolase activity);GO:0016787(hydrolase activity)		K15498	EC:3.1.3.16	protein phosphatase 6, catalytic subunit [Source:ZFIN;Acc:ZDB-GENE-040426-949]		28.0607	59.6794	114.401	49.0884	24.0049	23.108	19.9821	33.7669	12.5867	22.956	21.1774	17.9304
ENSDARG00000002952	smo	ENSDART00000005985	GO:0001570(vasculogenesis);GO:0001839(neural plate morphogenesis);GO:0001947(heart looping);GO:0003231(cardiac ventricle development);GO:0004888(transmembrane signaling receptor activity);GO:0005113(patched binding);GO:0005515(protein binding);GO:0005886(plasma membrane);GO:0005929(cilium);GO:0007166(cell surface receptor signaling pathway);GO:0007224(smoothened signaling pathway);GO:0007275(mult…	04340(Hedgehog signaling pathway)	K06226		smoothened, frizzled class receptor [Source:ZFIN;Acc:ZDB-GENE-980526-89]		0.68171	1.05563	1.14593	0.212	1.18394	2.12605	1.37489	1.59206	1.04854	0.371056	1.2015	2.13186
ENSDARG00000002956	si:dkey-32n7	ENSDART00000025912	GO:0007155(cell adhesion);GO:0007229(integrin-mediated signaling pathway);GO:0008305(integrin complex);GO:0016020(membrane);GO:0016021(integral component of membrane)	04810(Regulation of actin cytoskeleton)	K06462		si:dkey-32n7.4 [Source:ZFIN;Acc:ZDB-GENE-110411-175]		0.22327	0.105136	0.181636	0.118646	0.291914	0.430061	3.82764	3.76129	1.56835	0.036899	0.936527	0.204306
ENSDARG00000002959	gpr34b	ENSDART00000024795	GO:0004930(G protein-coupled receptor activity);GO:0005887(integral component of plasma membrane);GO:0007186(G protein-coupled receptor signaling pathway);GO:0016020(membrane);GO:0016021(integral component of membrane);GO:0035589(G protein-coupled purinergic nucleotide receptor signaling pathway);GO:0045028(G protein-coupled purinergic nucleotide receptor activity)		K08383		G protein-coupled receptor 34b [Source:ZFIN;Acc:ZDB-GENE-040823-1]		0.100368	0.040035	0.099518	0.065952	0.323535	0.906155	0.566602	1.02715	0.649816	0.120162	0.471295	0.632561
ENSDARG00000002967	pdap1b	ENSDART00000018626	GO:0003674(molecular_function);GO:0005575(cellular_component);GO:0008150(biological_process)				pdgfa associated protein 1b [Source:ZFIN;Acc:ZDB-GENE-040426-942]		11.3694	35.4438	52.1801	17.7123	27.7766	15.313	11.2954	9.73909	11.5631	9.14731	20.1975	15.8869
ENSDARG00000002968	a1cf	ENSDART00000152292;ENSDART00000185434	GO:0003676(nucleic acid binding);GO:0003723(RNA binding);GO:0003727(single-stranded RNA binding);GO:0003729(mRNA binding);GO:0005634(nucleus);GO:0010609(mRNA localization resulting in posttranscriptional regulation of gene expression);GO:0016554(cytidine to uridine editing);GO:0016556(mRNA modification);GO:0030895(apolipoprotein B mRNA editing enzyme complex);GO:0030895(apolipoprotein B mRNA edit…				apobec1 complementation factor [Source:ZFIN;Acc:ZDB-GENE-060824-3]		49.2157	4.66477	0.225931	1.3744	0.137299	0.694456	21.5686	100.521	0.351655	16.6695	0.41594	0.148811
ENSDARG00000002970	ss18	ENSDART00000011919;ENSDART00000164674	GO:0003713(transcription coactivator activity);GO:0005575(cellular_component);GO:0005634(nucleus);GO:0045893(positive regulation of transcription, DNA-templated);GO:0045944(positive regulation of transcription by RNA polymerase II);GO:0045944(positive regulation of transcription by RNA polymerase II)				synovial sarcoma translocation, chromosome 18 (H. sapiens) [Source:ZFIN;Acc:ZDB-GENE-030131-4867]		15.7914	34.2967	20.2276	39.3829	17.0856	17.7743	12.8813	21.9592	8.27183	19.3023	14.1427	9.83053
ENSDARG00000002971	phc1	ENSDART00000188334;ENSDART00000188643;ENSDART00000058496	GO:0005515(protein binding);GO:0005634(nucleus);GO:0008150(biological_process);GO:0008270(zinc ion binding);GO:0008270(zinc ion binding)		K11456		polyhomeotic homolog 1 [Source:ZFIN;Acc:ZDB-GENE-081022-39]		4.97066	6.1824	1.39826	11.553	1.28145	2.10118	2.25785	3.89042	1.2675	4.47047	1.91541	1.0927
ENSDARG00000002986	gda	ENSDART00000014013	GO:0006147(guanine catabolic process);GO:0008270(zinc ion binding);GO:0008892(guanine deaminase activity);GO:0016787(hydrolase activity);GO:0016810(hydrolase activity, acting on carbon-nitrogen (but not peptide) bonds);GO:0046098(guanine metabolic process)	00230(Purine metabolism)	K01487	EC:3.5.4.3	guanine deaminase [Source:ZFIN;Acc:ZDB-GENE-050522-434]		8.95478	21.8498	3.95578	0.148814	0.799745	0.324438	1.97085	5.78189	0.413782	2.50044	0.066846	0.289161
ENSDARG00000002988	tnnt2d	ENSDART00000139235;ENSDART00000048642	GO:0003009(skeletal muscle contraction);GO:0003674(molecular_function);GO:0005509(calcium ion binding);GO:0005515(protein binding);GO:0005523(tropomyosin binding);GO:0005861(troponin complex);GO:0006936(muscle contraction);GO:0006937(regulation of muscle contraction);GO:0030899(calcium-dependent ATPase activity);GO:0045214(sarcomere organization);GO:0060048(cardiac muscle contraction);GO:0060048(…				troponin T2d, cardiac [Source:ZFIN;Acc:ZDB-GENE-050626-97]		1.73999	0.779235	11.9918	1.26298	93.5589	53.8872	46.3374	1.23205	63.8065	0.574955	13.701	40.1935
ENSDARG00000002991	cep135	ENSDART00000033436;ENSDART00000121585	GO:0005737(cytoplasm);GO:0005814(centriole);GO:0005856(cytoskeleton);GO:0007099(centriole replication);GO:0010457(centriole-centriole cohesion);GO:0010457(centriole-centriole cohesion)		K16461		centrosomal protein 135 [Source:ZFIN;Acc:ZDB-GENE-041210-325]		3.37763	4.70572	1.14301	8.45065	1.03583	2.25309	1.98056	4.71793	0.779921	2.99201	1.75809	0.806712
ENSDARG00000002994	itpkca	ENSDART00000148346	GO:0016301(kinase activity);GO:0016310(phosphorylation);GO:0016740(transferase activity);GO:0032958(inositol phosphate biosynthetic process)	00562(Inositol phosphate metabolism);04020(Calcium signaling pathway);04070(Phosphatidylinositol signaling system)	K00911	EC:2.7.1.127	inositol-trisphosphate 3-kinase Ca [Source:ZFIN;Acc:ZDB-GENE-030131-6009]		12.4702	12.1483	5.55918	24.5272	1.24125	4.45613	8.11571	11.7481	2.25284	9.80354	3.6837	1.51409
ENSDARG00000003008	prkcea	ENSDART00000105608	GO:0000166(nucleotide binding);GO:0004672(protein kinase activity);GO:0004674(protein serine/threonine kinase activity);GO:0004697(protein kinase C activity);GO:0005524(ATP binding);GO:0006468(protein phosphorylation);GO:0016301(kinase activity);GO:0016310(phosphorylation);GO:0016740(transferase activity);GO:0018105(peptidyl-serine phosphorylation);GO:0035556(intracellular signal transduction);GO…	04270(Vascular smooth muscle contraction);04371(Apelin signaling pathway);04530(Tight junction);04933(AGE-RAGE signaling pathway in diabetic complications)	K18050	EC:2.7.11.13	protein kinase C, epsilon a [Source:ZFIN;Acc:ZDB-GENE-030131-8191]		1.21691	1.41959	1.76601	1.55956	1.59668	2.23534	1.42548	1.57904	1.50666	0.70784	1.42224	1.82885
ENSDARG00000003017	ube2al	ENSDART00000008490;ENSDART00000133899	GO:0000166(nucleotide binding);GO:0000209(protein polyubiquitination);GO:0000790(nuclear chromatin);GO:0005524(ATP binding);GO:0006281(DNA repair);GO:0016740(transferase activity);GO:0033503(HULC complex);GO:0043161(proteasome-mediated ubiquitin-dependent protein catabolic process);GO:0061631(ubiquitin conjugating enzyme activity);GO:0061631(ubiquitin conjugating enzyme activity)	04120(Ubiquitin mediated proteolysis);04120(Ubiquitin mediated proteolysis)	K10573	EC:2.3.2.23	ubiquitin conjugating enzyme E2 A, like [Source:ZFIN;Acc:ZDB-GENE-030131-4195]		34.53	99.04	281.647	71.2042	110.711	21.5081	16.6438	15.9464	15.0388	36.1561	30.2661	16.586
ENSDARG00000003020	lrrc4	ENSDART00000007520	GO:0005515(protein binding);GO:0016020(membrane);GO:0016021(integral component of membrane)	04514(Cell adhesion molecules (CAMs))	K16351		leucine rich repeat containing 4.2 [Source:ZFIN;Acc:ZDB-GENE-030131-7997]		0.062299	0	0.023974	0	0.082612	0.369624	0.148179	0.030888	0.320196	0.024019	0.054102	0.030146
ENSDARG00000003021	hdac8	ENSDART00000009184;ENSDART00000136047;ENSDART00000132716;ENSDART00000174307;ENSDART00000174282	GO:0004407(histone deacetylase activity);GO:0005634(nucleus);GO:0006325(chromatin organization);GO:0016575(histone deacetylation);GO:0016787(hydrolase activity);GO:0032041(NAD-dependent histone deacetylase activity (H3-K14 specific));GO:0046872(metal ion binding);GO:0070932(histone H3 deacetylation);GO:0070932(histone H3 deacetylation)		K11405	EC:3.5.1.98	histone deacetylase 8 [Source:ZFIN;Acc:ZDB-GENE-040426-2772]		3.49812	3.95073	1.78475	7.17764	2.59992	2.79595	3.51785	7.10954	1.30153	3.13014	1.95502	1.83856
ENSDARG00000003022	limk1b	ENSDART00000004686;ENSDART00000148513	GO:0004672(protein kinase activity);GO:0004674(protein serine/threonine kinase activity);GO:0005515(protein binding);GO:0005524(ATP binding);GO:0005634(nucleus);GO:0005737(cytoplasm);GO:0006468(protein phosphorylation);GO:0030036(actin cytoskeleton organization);GO:0046872(metal ion binding);GO:0051496(positive regulation of stress fiber assembly);GO:0051496(positive regulation of stress fiber as…				LIM domain kinase 1b [Source:ZFIN;Acc:ZDB-GENE-110411-106]		1.23581	0.360619	3.6465	0.3373	3.7605	5.62492	2.9035	2.0541	3.57702	0.456258	2.05944	4.2841
ENSDARG00000003027	scnm1	ENSDART00000132351;ENSDART00000004284;ENSDART00000133965	GO:0000380(alternative mRNA splicing, via spliceosome);GO:0005634(nucleus);GO:0005654(nucleoplasm);GO:0006397(mRNA processing);GO:0008380(RNA splicing);GO:0016607(nuclear speck);GO:0046872(metal ion binding);GO:0046872(metal ion binding)				sodium channel modifier 1 [Source:ZFIN;Acc:ZDB-GENE-030131-415]		8.80238	15.2226	2.65009	27.6404	2.41177	3.66169	2.01735	2.81089	2.03191	11.1639	2.37403	1.28817
ENSDARG00000003032	eif4a1b	ENSDART00000011878;ENSDART00000140602	GO:0000166(nucleotide binding);GO:0003676(nucleic acid binding);GO:0003743(translation initiation factor activity);GO:0004004(ATP-dependent RNA helicase activity);GO:0004386(helicase activity);GO:0005524(ATP binding);GO:0006413(translational initiation);GO:0016787(hydrolase activity);GO:0016787(hydrolase activity)	03013(RNA transport);03013(RNA transport)	K03257		eukaryotic translation initiation factor 4A1B [Source:ZFIN;Acc:ZDB-GENE-040120-6]		156.871	148.947	166.761	48.6415	248.837	195.412	271.825	268.895	259.933	92.7671	233.562	227.017
ENSDARG00000003035	hspa9	ENSDART00000136975;ENSDART00000012438	GO:0000166(nucleotide binding);GO:0005524(ATP binding);GO:0005737(cytoplasm);GO:0005739(mitochondrion);GO:0005759(mitochondrial matrix);GO:0006457(protein folding);GO:0006986(response to unfolded protein);GO:0016887(ATPase activity);GO:0030097(hemopoiesis);GO:0031072(heat shock protein binding);GO:0031101(fin regeneration);GO:0034605(cellular response to heat);GO:0034620(cellular response to unfo…	03018(RNA degradation);03018(RNA degradation)	K04043		heat shock protein 9 [Source:ZFIN;Acc:ZDB-GENE-030828-12]		47.6504	99.3915	37.2111	113.147	27.3882	36.7782	27.2173	20.4102	28.6957	43.5764	34.7287	38.529
ENSDARG00000003041	CABZ01111496	ENSDART00000020834	GO:0000209(protein polyubiquitination);GO:0008063(Toll signaling pathway);GO:0008592(regulation of Toll signaling pathway);GO:0061630(ubiquitin protein ligase activity)				E3 ubiquitin-protein ligase pellino homolog 2-like [Source:NCBI gene;Acc:100334245]		0.448647	1.52285	0.020783	0.429263	0	0	0.684185	2.14325	0	0.499382	0.119793	0.145761
ENSDARG00000003046	sorbs2a	ENSDART00000138475;ENSDART00000041215	GO:0005515(protein binding);GO:0007015(actin filament organization);GO:0007015(actin filament organization)				sorbin and SH3 domain containing 2a [Source:ZFIN;Acc:ZDB-GENE-070308-2]		0.352944	0.222251	0.21856	0.122497	0.384648	1.01459	0.180682	0.370758	0.264646	0.295311	0.225208	0.573314
ENSDARG00000003054	tacr3l	ENSDART00000003278	GO:0004930(G protein-coupled receptor activity);GO:0004995(tachykinin receptor activity);GO:0005886(plasma membrane);GO:0007165(signal transduction);GO:0007186(G protein-coupled receptor signaling pathway);GO:0007217(tachykinin receptor signaling pathway);GO:0016020(membrane);GO:0016021(integral component of membrane);GO:0097225(sperm midpiece);GO:1902093(positive regulation of flagellated sperm …	04020(Calcium signaling pathway);04080(Neuroactive ligand-receptor interaction)	K04224		tachykinin receptor 3-like [Source:ZFIN;Acc:ZDB-GENE-061207-19]		0.071663	0.161626	0.841308	0.009128	0.104031	0.157635	0.276159	1.0721	0.093309	0	0	0.024989
ENSDARG00000003058	fgfr1op	ENSDART00000159485;ENSDART00000131422;ENSDART00000010494;ENSDART00000137007;ENSDART00000153066	GO:0005509(calcium ion binding);GO:0005515(protein binding);GO:0005815(microtubule organizing center);GO:0034453(microtubule anchoring);GO:0034453(microtubule anchoring)		K16546		FGFR1 oncogene partner [Source:ZFIN;Acc:ZDB-GENE-090417-1]		5.85336	8.47743	4.75099	14.2806	5.49912	5.79246	5.16203	6.21168	3.55731	6.63525	4.83357	2.56323
ENSDARG00000003061	cd276	ENSDART00000033591;ENSDART00000150013;ENSDART00000149912	GO:0003674(molecular_function);GO:0005102(signaling receptor binding);GO:0009897(external side of plasma membrane);GO:0016020(membrane);GO:0016021(integral component of membrane);GO:0050776(regulation of immune response);GO:0050852(T cell receptor signaling pathway);GO:0050852(T cell receptor signaling pathway)	04514(Cell adhesion molecules (CAMs));04514(Cell adhesion molecules (CAMs))	K06746		CD276 molecule [Source:ZFIN;Acc:ZDB-GENE-070112-452]		1.42436	1.68777	4.20136	0.389699	3.27102	2.86413	1.09724	3.89889	1.12274	0.415637	1.96095	3.77871
ENSDARG00000003068	gorasp1a	ENSDART00000024619	GO:0005515(protein binding);GO:0005794(Golgi apparatus);GO:0007030(Golgi organization)				golgi reassembly stacking protein 1a [Source:ZFIN;Acc:ZDB-GENE-030826-23]		2.50846	1.4125	3.35972	0.437514	7.24484	7.11226	3.75596	3.19928	3.88097	0.676887	8.92834	5.84208
ENSDARG00000003069	btbd7	ENSDART00000020710;ENSDART00000149024	GO:0005515(protein binding);GO:0005515(protein binding)		K10479		BTB (POZ) domain containing 7 [Source:ZFIN;Acc:ZDB-GENE-030131-4477]		2.43366	3.10351	1.44262	3.56225	0.34424	0.724994	0.148338	0.610712	0.335627	1.59816	0.288877	0.081023
ENSDARG00000003077	gpx9	ENSDART00000016553	GO:0004601(peroxidase activity);GO:0004602(glutathione peroxidase activity);GO:0006979(response to oxidative stress);GO:0016491(oxidoreductase activity);GO:0055114(oxidation-reduction process);GO:0098869(cellular oxidant detoxification)				glutathione peroxidase 9 [Source:ZFIN;Acc:ZDB-GENE-130603-13]		0	0	0	0.0286359	0	0	0	0	0	0	0	0
ENSDARG00000003081	mybphb	ENSDART00000164232;ENSDART00000158845;ENSDART00000026359;ENSDART00000122794;ENSDART00000183742;ENSDART00000172526	GO:0005515(protein binding);GO:0005865(striated muscle thin filament);GO:0006936(muscle contraction);GO:0008307(structural constituent of muscle);GO:0030017(sarcomere);GO:0030018(Z disc);GO:0030240(skeletal muscle thin filament assembly);GO:0030241(skeletal muscle myosin thick filament assembly);GO:0031430(M band);GO:0045214(sarcomere organization);GO:0048739(cardiac muscle fiber development);GO:…				myosin binding protein Hb [Source:ZFIN;Acc:ZDB-GENE-030131-9794]		37.8415	17.3242	207.222	11.7578	237.516	296.86	272.496	23.8948	430.597	28.3495	226.71	347.513
ENSDARG00000003084	spire2	ENSDART00000012287;ENSDART00000182506;ENSDART00000183561;ENSDART00000035245;ENSDART00000136226	GO:0003779(actin binding);GO:0016192(vesicle-mediated transport);GO:0045010(actin nucleation);GO:0045010(actin nucleation)				spire-type actin nucleation factor 2 [Source:ZFIN;Acc:ZDB-GENE-041114-29]		1.82355	3.43219	0.277504	5.77846	0	0.0428087	0.152926	0.0462882	0.129067	3.09783	0.0807374	0.110014
ENSDARG00000003085	stambpl1	ENSDART00000106035;ENSDART00000152478	GO:0004843(thiol-dependent ubiquitin-specific protease activity);GO:0005515(protein binding);GO:0005768(endosome);GO:0016020(membrane);GO:0016579(protein deubiquitination);GO:0061578(Lys63-specific deubiquitinase activity);GO:0070536(protein K63-linked deubiquitination);GO:0070536(protein K63-linked deubiquitination)		K11867	EC:3.4.19.12	STAM binding protein-like 1 [Source:ZFIN;Acc:ZDB-GENE-100215-4]		1.22149	1.72209	1.123	1.54855	0.632104	1.04982	0.958869	1.20234	0.477107	0.515882	1.77107	0.57966
ENSDARG00000003087	ubxn6	ENSDART00000017755	GO:0005515(protein binding)	04141(Protein processing in endoplasmic reticulum)	K14011		UBX domain protein 6 [Source:ZFIN;Acc:ZDB-GENE-030131-5680]		5.79936	12.7491	11.5147	6.36371	9.26673	9.02904	6.91203	10.7343	4.90314	5.17289	5.7909	4.73112
ENSDARG00000003090	or103-4	ENSDART00000019701	GO:0004930(G protein-coupled receptor activity);GO:0004984(olfactory receptor activity);GO:0005886(plasma membrane);GO:0007165(signal transduction);GO:0007186(G protein-coupled receptor signaling pathway);GO:0007608(sensory perception of smell);GO:0016020(membrane);GO:0016021(integral component of membrane);GO:0050896(response to stimulus);GO:0050911(detection of chemical stimulus involved in sen…		K04257		odorant receptor, family C, subfamily 103, member 4 [Source:ZFIN;Acc:ZDB-GENE-000329-12]		0	0	0	0.0284585	0	0	0	0	0	0	0	0
ENSDARG00000003091	oclnb	ENSDART00000134432;ENSDART00000193816;ENSDART00000098514	GO:0016020(membrane);GO:0016021(integral component of membrane);GO:0016021(integral component of membrane)	04514(Cell adhesion molecules (CAMs));04530(Tight junction);04530(Tight junction)	K06088		occludin b [Source:ZFIN;Acc:ZDB-GENE-041212-43]		9.52975	19.6663	21.8388	22.7353	25.7807	26.7398	9.54512	10.1624	14.421	11.7321	45.6111	25.6764
ENSDARG00000003098	kdm5bb	ENSDART00000005583;ENSDART00000149173;ENSDART00000108508;ENSDART00000150113;ENSDART00000148765	GO:0003677(DNA binding);GO:0005634(nucleus);GO:0046872(metal ion binding);GO:0046872(metal ion binding)		K11446	EC:1.14.11.-	lysine (K)-specific demethylase 5Bb [Source:ZFIN;Acc:ZDB-GENE-030424-1]		10.7444	14.9254	14.1538	17.0386	11.0163	13.0649	8.47769	13.0203	7.24091	10.9177	12.2288	9.05376
ENSDARG00000003109	rcan1a	ENSDART00000020638;ENSDART00000134447;ENSDART00000144141;ENSDART00000138963	GO:0002040(sprouting angiogenesis);GO:0003676(nucleic acid binding);GO:0005737(cytoplasm);GO:0008597(calcium-dependent protein serine/threonine phosphatase regulator activity);GO:0019722(calcium-mediated signaling);GO:0033173(calcineurin-NFAT signaling cascade);GO:0043666(regulation of phosphoprotein phosphatase activity);GO:0070884(regulation of calcineurin-NFAT signaling cascade);GO:0070884(reg…		K17901		regulator of calcineurin 1a [Source:ZFIN;Acc:ZDB-GENE-040801-135]		6.04306	7.47304	9.41193	4.76341	17.9606	13.8756	11.6727	11.0085	8.37579	5.09743	39.5888	13.8891
ENSDARG00000003113	ada	ENSDART00000019519	GO:0004000(adenosine deaminase activity);GO:0009168(purine ribonucleoside monophosphate biosynthetic process);GO:0019239(deaminase activity)	00230(Purine metabolism)	K01488	EC:3.5.4.4	adenosine deaminase [Source:ZFIN;Acc:ZDB-GENE-040718-393]		22.7758	6.12679	30.6611	2.00181	37.8688	41.604	52.7626	68.8019	20.7052	8.51463	26.1116	22.6433
ENSDARG00000003127	zgc:123105	ENSDART00000186354;ENSDART00000007675;ENSDART00000133099;ENSDART00000147318	GO:0005737(cytoplasm);GO:0016491(oxidoreductase activity);GO:0055114(oxidation-reduction process);GO:0055114(oxidation-reduction process)				zgc:123105 [Source:ZFIN;Acc:ZDB-GENE-051113-272]		12.1429	10.1982	8.27382	9.42319	12.5354	11.7371	11.2449	14.9901	6.71516	4.87469	7.99886	6.40736
ENSDARG00000003132	apip	ENSDART00000007487	GO:0005737(cytoplasm);GO:0006915(apoptotic process);GO:0008270(zinc ion binding);GO:0008652(cellular amino acid biosynthetic process);GO:0009086(methionine biosynthetic process);GO:0016829(lyase activity);GO:0019284(L-methionine salvage from S-adenosylmethionine);GO:0019509(L-methionine salvage from methylthioadenosine);GO:0046570(methylthioribulose 1-phosphate dehydratase activity);GO:0046872(me…	00270(Cysteine and methionine metabolism)	K08964	EC:4.2.1.109	APAF1 interacting protein [Source:ZFIN;Acc:ZDB-GENE-040912-128]		22.5818	16.2253	22.2918	26.2507	15.7489	24.9812	15.388	20.6277	15.2951	18.3015	23.3502	8.00967
ENSDARG00000003142	dachc	ENSDART00000018827;ENSDART00000135617;ENSDART00000124561	GO:0005634(nucleus);GO:0005667(transcription factor complex);GO:0006355(regulation of transcription, DNA-templated);GO:0006355(regulation of transcription, DNA-templated)				dachshund c [Source:ZFIN;Acc:ZDB-GENE-020402-5]		1.25524	0.767479	2.53931	0.875773	0.83525	1.29222	1.58885	2.26576	0.660343	0.33661	0.967729	0.143582
ENSDARG00000003144	pxmp2	ENSDART00000026516;ENSDART00000138049	GO:0003674(molecular_function);GO:0005737(cytoplasm);GO:0008150(biological_process);GO:0016020(membrane);GO:0016021(integral component of membrane);GO:0016021(integral component of membrane)	04146(Peroxisome);04146(Peroxisome)	K13347		peroxisomal membrane protein 2 [Source:ZFIN;Acc:ZDB-GENE-040912-184]		18.7097	12.166	1.68639	9.73779	2.36514	1.05093	1.8315	50.5662	0.8194	9.99355	2.11192	1.30163
ENSDARG00000003146	si:dkey-27m7	ENSDART00000057913;ENSDART00000145438	GO:0005198(structural molecule activity);GO:0005882(intermediate filament);GO:0005883(neurofilament);GO:0061564(axon development);GO:0061564(axon development)				si:dkey-27m7.4 [Source:ZFIN;Acc:ZDB-GENE-090313-297]		0	0.0727232	0.0824946	0	0.0855286	0.0751961	0.0273726	0.047535	0.0256905	0	0	0
ENSDARG00000003151	skp1	ENSDART00000008454;ENSDART00000188017	GO:0006511(ubiquitin-dependent protein catabolic process);GO:0016301(kinase activity);GO:0016310(phosphorylation);GO:0016310(phosphorylation)	04110(Cell cycle);04114(Oocyte meiosis);04120(Ubiquitin mediated proteolysis);04141(Protein processing in endoplasmic reticulum);04310(Wnt signaling pathway);04350(TGF-beta signaling pathway);04350(TGF-beta signaling pathway)	K03094		S-phase kinase-associated protein 1 [Source:ZFIN;Acc:ZDB-GENE-040426-1707]		89.8703	91.9608	171.236	114.041	146.077	132.992	110.641	105.97	98.5009	70.9425	132.826	108.166
ENSDARG00000003153	nudt21	ENSDART00000023721	GO:0003723(RNA binding);GO:0003729(mRNA binding);GO:0005634(nucleus);GO:0005737(cytoplasm);GO:0005849(mRNA cleavage factor complex);GO:0006378(mRNA polyadenylation);GO:0006397(mRNA processing);GO:0010608(posttranscriptional regulation of gene expression);GO:0016787(hydrolase activity);GO:0017091(AU-rich element binding);GO:0030154(cell differentiation);GO:0031439(positive regulation of mRNA cleav…	03015(mRNA surveillance pathway)	K14397		nudix hydrolase 21 [Source:ZFIN;Acc:ZDB-GENE-040426-1316]		14.4853	20.8332	9.47353	28.752	9.55096	14.3238	10.6466	18.9058	6.01615	15.0075	12.4724	9.73284
ENSDARG00000003157	nfkbil1	ENSDART00000059017	GO:0005515(protein binding);GO:0007249(I-kappaB kinase/NF-kappaB signaling)		K09256		nuclear factor of kappa light polypeptide gene enhancer in B-cells inhibitor-like 1 [Source:ZFIN;Acc:ZDB-GENE-040116-7]		0.644135	0.439068	0.642622	0.218472	1.3384	1.21562	1.04812	1.36014	1.17584	0.223375	1.23315	1.07417
ENSDARG00000003165	nr2f6b	ENSDART00000165031;ENSDART00000027666;ENSDART00000161458;ENSDART00000159680;ENSDART00000176170	GO:0003677(DNA binding);GO:0003700(DNA-binding transcription factor activity);GO:0003707(steroid hormone receptor activity);GO:0005634(nucleus);GO:0006355(regulation of transcription, DNA-templated);GO:0008270(zinc ion binding);GO:0043401(steroid hormone mediated signaling pathway);GO:0043565(sequence-specific DNA binding);GO:0046872(metal ion binding);GO:0046872(metal ion binding)		K08549		nuclear receptor subfamily 2, group F, member 6b [Source:ZFIN;Acc:ZDB-GENE-040426-2351]		1.79735	2.79572	2.43701	0.235667	5.12978	3.92882	5.04536	5.45073	5.12777	0.740941	3.92421	3.16326
ENSDARG00000003167	mlst8	ENSDART00000178845;ENSDART00000185149;ENSDART00000148326;ENSDART00000131995;ENSDART00000134530;ENSDART00000162900	GO:0003674(molecular_function);GO:0005515(protein binding);GO:0005737(cytoplasm);GO:0031929(TOR signaling);GO:0031931(TORC1 complex);GO:0031932(TORC2 complex);GO:0032008(positive regulation of TOR signaling);GO:0032956(regulation of actin cytoskeleton organization);GO:0032956(regulation of actin cytoskeleton organization)	04136(Autophagy - other);04140(Autophagy - animal);04150(mTOR signaling pathway);04150(mTOR signaling pathway)	K08266		MTOR associated protein, LST8 homolog (S. cerevisiae) [Source:ZFIN;Acc:ZDB-GENE-030131-6176]		3.71539	3.59542	2.93833	4.84022	3.1052	4.59444	3.79989	5.46335	2.57619	2.68864	3.96101	3.57668
ENSDARG00000003169	magi1b	ENSDART00000103969;ENSDART00000103968;ENSDART00000176141;ENSDART00000158123;ENSDART00000164294;ENSDART00000171766	GO:0005515(protein binding);GO:0005737(cytoplasm);GO:0005911(cell-cell junction);GO:0005923(bicellular tight junction);GO:0007165(signal transduction);GO:0032947(protein-containing complex scaffold activity);GO:0032947(protein-containing complex scaffold activity)	04530(Tight junction);04530(Tight junction)	K05631		membrane associated guanylate kinase, WW and PDZ domain containing 1b [Source:ZFIN;Acc:ZDB-GENE-030131-5110]		2.61373	6.02743	3.83296	5.11354	2.77367	4.27731	1.80555	2.68707	1.97511	2.91725	4.52787	3.84343
ENSDARG00000003175	stx5al	ENSDART00000146315;ENSDART00000021121	GO:0000139(Golgi membrane);GO:0000149(SNARE binding);GO:0005484(SNAP receptor activity);GO:0006886(intracellular protein transport);GO:0006888(endoplasmic reticulum to Golgi vesicle-mediated transport);GO:0006906(vesicle fusion);GO:0012505(endomembrane system);GO:0016020(membrane);GO:0016021(integral component of membrane);GO:0016192(vesicle-mediated transport);GO:0031201(SNARE complex);GO:004827…	04130(SNARE interactions in vesicular transport);04130(SNARE interactions in vesicular transport)	K08490		syntaxin 5A, like [Source:ZFIN;Acc:ZDB-GENE-030131-1825]		9.54271	11.2398	6.78356	13.5316	7.28677	8.18324	4.93661	5.9224	3.75913	8.10114	6.43264	4.7952
ENSDARG00000003181	sult1st4	ENSDART00000030557;ENSDART00000145333	GO:0005575(cellular_component);GO:0008146(sulfotransferase activity);GO:0016740(transferase activity);GO:0016740(transferase activity)				sulfotransferase family 1, cytosolic sulfotransferase 4 [Source:ZFIN;Acc:ZDB-GENE-040426-2054]		10.3449	4.50067	1.97592	0.851468	1.61417	6.52168	5.57117	29.4537	4.13164	2.51991	4.84509	0
ENSDARG00000003189	psmd1	ENSDART00000159016;ENSDART00000193346;ENSDART00000007346;ENSDART00000144100	GO:0000502(proteasome complex);GO:0004175(endopeptidase activity);GO:0005634(nucleus);GO:0008540(proteasome regulatory particle, base subcomplex);GO:0016020(membrane);GO:0016021(integral component of membrane);GO:0022624(proteasome accessory complex);GO:0030234(enzyme regulator activity);GO:0034515(proteasome storage granule);GO:0042176(regulation of protein catabolic process);GO:0043161(proteaso…	03050(Proteasome);03050(Proteasome)	K03032		proteasome 26S subunit, non-ATPase 1 [Source:ZFIN;Acc:ZDB-GENE-040426-810]		29.0411	84.6745	210.764	53.5682	60.7927	29.0642	18.0079	23.2922	15.9563	27.9501	36.5704	25.8681
ENSDARG00000003193	rassf7b	ENSDART00000025451;ENSDART00000141934;ENSDART00000137059;ENSDART00000131210;ENSDART00000176372;ENSDART00000192172;ENSDART00000144878	GO:0003674(molecular_function);GO:0005575(cellular_component);GO:0007165(signal transduction);GO:0070507(regulation of microtubule cytoskeleton organization);GO:0070507(regulation of microtubule cytoskeleton organization)		K09855		Ras association (RalGDS/AF-6) domain family (N-terminal) member 7b [Source:ZFIN;Acc:ZDB-GENE-030429-1]		1.75043	2.17203	2.74199	0.233396	3.0847	3.36934	3.26857	6.01953	1.56366	0.747358	5.77501	2.15976
ENSDARG00000003197	wdr21	ENSDART00000024088	GO:0005515(protein binding)				WD repeat domain 21 [Source:ZFIN;Acc:ZDB-GENE-040109-2]		6.33847	8.03472	5.72581	18.0987	5.05304	2.484	1.95306	3.89788	1.69852	12.832	0.443827	3.33376
ENSDARG00000003200	foxm1	ENSDART00000008898;ENSDART00000165354;ENSDART00000162390;ENSDART00000166232	GO:0003677(DNA binding);GO:0003700(DNA-binding transcription factor activity);GO:0005634(nucleus);GO:0006355(regulation of transcription, DNA-templated);GO:0043565(sequence-specific DNA binding);GO:0043565(sequence-specific DNA binding)	04218(Cellular senescence);04218(Cellular senescence)	K09406		forkhead box M1 [Source:ZFIN;Acc:ZDB-GENE-040426-1275]		10.1033	13.8417	2.20803	25.4011	0.740806	1.64237	13.7398	28.5289	0.422259	12.2233	1.86894	1.07846
ENSDARG00000003203	rhcga	ENSDART00000053521;ENSDART00000149046	GO:0005887(integral component of plasma membrane);GO:0008519(ammonium transmembrane transporter activity);GO:0015696(ammonium transport);GO:0016020(membrane);GO:0016021(integral component of membrane);GO:0072488(ammonium transmembrane transport);GO:0072488(ammonium transmembrane transport)		K06580		Rh family, C glycoprotein a [Source:ZFIN;Acc:ZDB-GENE-070424-81]		0.123605	0.916242	0.250233	0.141262	0.199185	0.120935	0.254414	0.863226	0	0.555769	0.216973	0.0602829
ENSDARG00000003205	ngly1	ENSDART00000019206	GO:0005737(cytoplasm);GO:0006516(glycoprotein catabolic process)	04141(Protein processing in endoplasmic reticulum)	K01456	EC:3.5.1.52	N-glycanase 1 [Source:ZFIN;Acc:ZDB-GENE-050522-535]		5.75378	9.13714	6.29748	8.74762	7.51049	5.98556	3.54717	5.54502	3.01657	4.21332	7.17612	4.77942
ENSDARG00000003206	chchd6a	ENSDART00000143933;ENSDART00000140977;ENSDART00000123925;ENSDART00000176139;ENSDART00000143339;ENSDART00000138142	GO:0003674(molecular_function);GO:0005739(mitochondrion);GO:0005743(mitochondrial inner membrane);GO:0006974(cellular response to DNA damage stimulus);GO:0016020(membrane);GO:0042407(cristae formation);GO:0061617(MICOS complex);GO:0061617(MICOS complex)		K17564		coiled-coil-helix-coiled-coil-helix domain containing 6a [Source:ZFIN;Acc:ZDB-GENE-040930-2]		10.2039	16.4108	22.9658	20.4585	23.8991	17.0437	11.9819	13.8199	14.5771	10.5328	19.1821	13.1924
ENSDARG00000003207	mterf3	ENSDART00000006338;ENSDART00000151574	GO:0003690(double-stranded DNA binding);GO:0005739(mitochondrion);GO:0006355(regulation of transcription, DNA-templated);GO:0006390(mitochondrial transcription);GO:0032543(mitochondrial translation);GO:0061668(mitochondrial ribosome assembly);GO:0061668(mitochondrial ribosome assembly)		K15032		mitochondrial transcription termination factor 3 [Source:ZFIN;Acc:ZDB-GENE-040718-359]		5.32819	11.8888	10.8552	19.8557	3.69527	3.92595	4.76098	4.84785	4.41178	10.876	3.72996	1.54655
ENSDARG00000003208	pomk	ENSDART00000122695	GO:0000166(nucleotide binding);GO:0004672(protein kinase activity);GO:0005524(ATP binding);GO:0005783(endoplasmic reticulum);GO:0005789(endoplasmic reticulum membrane);GO:0006468(protein phosphorylation);GO:0006493(protein O-linked glycosylation);GO:0016020(membrane);GO:0016021(integral component of membrane);GO:0016301(kinase activity);GO:0016310(phosphorylation);GO:0016740(transferase activity)…	00515(Mannose type O-glycan biosynthesis)	K17547	EC:2.7.1.183	protein-O-mannose kinase [Source:ZFIN;Acc:ZDB-GENE-041114-119]		1.97167	2.20539	0.833781	2.99865	1.6428	1.47512	1.21618	1.66982	1.00396	2.5511	0.872813	1.14657
ENSDARG00000003210	si:ch73-86n2	ENSDART00000141493	GO:0016020(membrane);GO:0016021(integral component of membrane)				si:ch73-86n2.1 [Source:ZFIN;Acc:ZDB-GENE-091204-400]		0	0	0	0	0	0	0.131486	0.0359885	0	0	0	0
ENSDARG00000003213	naa15a	ENSDART00000017785;ENSDART00000124417	GO:0004596(peptide alpha-N-acetyltransferase activity);GO:0005515(protein binding);GO:0005737(cytoplasm);GO:0017196(N-terminal peptidyl-methionine acetylation);GO:0031415(NatA complex);GO:0031415(NatA complex)		K20792		N(alpha)-acetyltransferase 15, NatA auxiliary subunit a [Source:ZFIN;Acc:ZDB-GENE-030131-2392]		25.3849	45.7117	16.3793	51.2197	12.1479	14.332	10.7212	11.4561	9.39099	27.3829	13.351	14.7695
ENSDARG00000003216	anxa2a	ENSDART00000011967;ENSDART00000182856	GO:0004859(phospholipase inhibitor activity);GO:0005509(calcium ion binding);GO:0005544(calcium-dependent phospholipid binding);GO:0008092(cytoskeletal protein binding);GO:0043086(negative regulation of catalytic activity);GO:0043086(negative regulation of catalytic activity)		K17092		annexin A2a [Source:ZFIN;Acc:ZDB-GENE-030131-4282]		38.2006	117.331	317.138	7.84467	105.178	111.36	68.1457	38.5817	51.3238	11.504	134.246	192.402
ENSDARG00000003217	urb2	ENSDART00000176800;ENSDART00000138747	GO:0005730(nucleolus);GO:0042254(ribosome biogenesis);GO:0042254(ribosome biogenesis)		K14862		URB2 ribosome biogenesis homolog [Source:ZFIN;Acc:ZDB-GENE-030131-2621]		4.46746	5.92991	1.89905	9.00879	1.13843	0.948368	1.03268	1.51755	0.446589	4.33238	1.11327	0.863511
ENSDARG00000003219	bin2a	ENSDART00000025196;ENSDART00000187641;ENSDART00000162772;ENSDART00000146504	GO:0001891(phagocytic cup);GO:0002102(podosome);GO:0005515(protein binding);GO:0005543(phospholipid binding);GO:0005737(cytoplasm);GO:0005886(plasma membrane);GO:0006911(phagocytosis, engulfment);GO:0071800(podosome assembly);GO:0097320(plasma membrane tubulation);GO:0097320(plasma membrane tubulation)				bridging integrator 2a [Source:ZFIN;Acc:ZDB-GENE-041114-126]		5.99896	2.63516	8.92419	1.46446	0.13146	3.6871	25.6851	43.8221	2.84875	3.01885	7.22655	0.0753177
ENSDARG00000003229	gdf9	ENSDART00000019296	GO:0005125(cytokine activity);GO:0005160(transforming growth factor beta receptor binding);GO:0005576(extracellular region);GO:0005615(extracellular space);GO:0008083(growth factor activity);GO:0010469(regulation of signaling receptor activity);GO:0010862(positive regulation of pathway-restricted SMAD protein phosphorylation);GO:0030237(female sex determination);GO:0030509(BMP signaling pathway);…	04060(Cytokine-cytokine receptor interaction)	K22673		growth differentiation factor 9 [Source:ZFIN;Acc:ZDB-GENE-050221-7]		8.19864	12.798	1.20272	22.957	0.049379	0.143544	0.066405	0.347759	0.120322	9.75018	0.491101	0.088708
ENSDARG00000003235	nup88	ENSDART00000023123	GO:0000055(ribosomal large subunit export from nucleus);GO:0000056(ribosomal small subunit export from nucleus);GO:0005643(nuclear pore);GO:0006406(mRNA export from nucleus);GO:0006606(protein import into nucleus);GO:0006611(protein export from nucleus);GO:0006913(nucleocytoplasmic transport);GO:0017056(structural constituent of nuclear pore)	03013(RNA transport)	K14318		nucleoporin 88 [Source:ZFIN;Acc:ZDB-GENE-050522-297]		11.8634	21.5961	10.5663	25.9048	7.45885	8.40657	7.10541	10.2394	3.68499	12.9452	6.53661	5.45644
ENSDARG00000003244	gbp3	ENSDART00000143885;ENSDART00000007074	GO:0000166(nucleotide binding);GO:0003924(GTPase activity);GO:0005525(GTP binding);GO:0006954(inflammatory response);GO:0042981(regulation of apoptotic process);GO:0045087(innate immune response);GO:0045087(innate immune response)				guanylate binding protein 3 [Source:ZFIN;Acc:ZDB-GENE-070912-176]		12.8935	14.5268	2.03009	31.836	2.40175	2.84563	4.26979	8.96539	2.58776	11.438	7.00948	2.6257
ENSDARG00000003250	pik3cd	ENSDART00000006120	GO:0000166(nucleotide binding);GO:0005524(ATP binding);GO:0005737(cytoplasm);GO:0005886(plasma membrane);GO:0005942(phosphatidylinositol 3-kinase complex);GO:0006468(protein phosphorylation);GO:0014065(phosphatidylinositol 3-kinase signaling);GO:0016020(membrane);GO:0016301(kinase activity);GO:0016303(1-phosphatidylinositol-3-kinase activity);GO:0016310(phosphorylation);GO:0016477(cell migration)…	00562(Inositol phosphate metabolism);04012(ErbB signaling pathway);04068(FoxO signaling pathway);04070(Phosphatidylinositol signaling system);04140(Autophagy - animal);04150(mTOR signaling pathway);04210(Apoptosis);04218(Cellular senescence);04370(VEGF signaling pathway);04510(Focal adhesion);04620(Toll-like receptor signaling pathway);04625(C-type lectin receptor signaling pathway);04810(Regulat…	K00922	EC:2.7.1.153	phosphatidylinositol-4,5-bisphosphate 3-kinase, catalytic subunit delta [Source:ZFIN;Acc:ZDB-GENE-040426-1128]		2.56281	2.26276	1.2342	1.19707	2.58248	4.0265	1.62593	3.42463	2.33192	2.14968	2.44121	1.19618
ENSDARG00000003251	zbtb22b	ENSDART00000110366	GO:0003676(nucleic acid binding);GO:0003677(DNA binding);GO:0005515(protein binding);GO:0005634(nucleus)		K10502		zinc finger and BTB domain containing 22b [Source:ZFIN;Acc:ZDB-GENE-010110-4]		6.10472	11.3603	2.05855	10.6413	0.410009	1.01237	0.690985	2.21099	0.469339	9.80548	0.62632	0.423069
ENSDARG00000003257	zgc:101559	ENSDART00000006256	GO:0000139(Golgi membrane);GO:0003924(GTPase activity);GO:0005525(GTP binding);GO:0005789(endoplasmic reticulum membrane);GO:0006886(intracellular protein transport);GO:0006888(endoplasmic reticulum to Golgi vesicle-mediated transport);GO:0032482(Rab protein signal transduction)				zgc:101559 [Source:ZFIN;Acc:ZDB-GENE-041114-122]		1.5671	0.864744	0.895548	1.29281	1.3957	1.0196	1.24347	2.80175	0.731195	0.925332	0.674215	0.750521
ENSDARG00000003259	loxa	ENSDART00000125407;ENSDART00000016317;ENSDART00000114373	GO:0004720(protein-lysine 6-oxidase activity);GO:0005507(copper ion binding);GO:0005575(cellular_component);GO:0005615(extracellular space);GO:0007517(muscle organ development);GO:0016641(oxidoreductase activity, acting on the CH-NH2 group of donors, oxygen as acceptor);GO:0018057(peptidyl-lysine oxidation);GO:0022008(neurogenesis);GO:0051216(cartilage development);GO:0055114(oxidation-reduction …		K00277	EC:1.4.3.13	lysyl oxidase a [Source:ZFIN;Acc:ZDB-GENE-040426-2398]		1.99974	3.80376	19.5999	0.363461	27.633	4.3747	8.25233	4.11809	3.28494	0.902072	2.54637	10.7833
ENSDARG00000003269	clcn3	ENSDART00000172848;ENSDART00000173018;ENSDART00000049311;ENSDART00000172859;ENSDART00000172934	GO:0005247(voltage-gated chloride channel activity);GO:0005768(endosome);GO:0005769(early endosome);GO:0005794(Golgi apparatus);GO:0005886(plasma membrane);GO:0005887(integral component of plasma membrane);GO:0006811(ion transport);GO:0006821(chloride transport);GO:0008021(synaptic vesicle);GO:0015299(solute:proton antiporter activity);GO:0016020(membrane);GO:0016021(integral component of membran…		K05012		chloride channel 3 [Source:ZFIN;Acc:ZDB-GENE-030131-1699]		5.24953	8.33317	12.5443	5.95783	3.90115	8.46725	3.79824	6.32339	2.80674	3.8696	7.01923	5.35229
ENSDARG00000003270	dhps	ENSDART00000074068;ENSDART00000166913;ENSDART00000182596	GO:0003323(type B pancreatic cell development);GO:0005737(cytoplasm);GO:0008612(peptidyl-lysine modification to peptidyl-hypusine);GO:0031017(exocrine pancreas development);GO:0034038(deoxyhypusine synthase activity);GO:0034038(deoxyhypusine synthase activity)		K00809	EC:2.5.1.46	deoxyhypusine synthase [Source:ZFIN;Acc:ZDB-GENE-040426-2001]		6.1189	9.36713	6.77962	18.2501	5.36552	6.21253	6.51474	7.05373	3.44172	9.1067	5.01152	3.66407
ENSDARG00000003281	pik3ip1	ENSDART00000134697	GO:0016020(membrane);GO:0016021(integral component of membrane)				phosphoinositide-3-kinase interacting protein 1 [Source:ZFIN;Acc:ZDB-GENE-031030-14]		37.0683	52.9124	57.9977	101.633	48.8	23.2234	18.759	12.5482	17.47	42.1264	31.5086	13.1091
ENSDARG00000003287	wdr12	ENSDART00000012903	GO:0000463(maturation of LSU-rRNA from tricistronic rRNA transcript (SSU-rRNA, 5.8S rRNA, LSU-rRNA));GO:0000466(maturation of 5.8S rRNA from tricistronic rRNA transcript (SSU-rRNA, 5.8S rRNA, LSU-rRNA));GO:0005515(protein binding);GO:0005634(nucleus);GO:0005654(nucleoplasm);GO:0005730(nucleolus);GO:0006364(rRNA processing);GO:0008283(cell population proliferation);GO:0030687(preribosome, large su…		K14863		WD repeat domain 12 [Source:ZFIN;Acc:ZDB-GENE-030131-371]		15.2883	27.5612	6.57846	54.9791	4.13681	5.04201	3.27287	5.54041	2.38524	20.8021	3.71549	3.75184
ENSDARG00000003290	dab1b	ENSDART00000167202;ENSDART00000108481	GO:0003674(molecular_function);GO:0005515(protein binding);GO:0005575(cellular_component);GO:0005575(cellular_component)				Dab, reelin signal transducer, homolog 1b (Drosophila) [Source:ZFIN;Acc:ZDB-GENE-060421-7958]		0	0.02497	0	0	0.0324282	0	2.96648	4.4711	0	0	0	0
ENSDARG00000003293	sox9a	ENSDART00000005676;ENSDART00000127937	GO:0000981(DNA-binding transcription factor activity, RNA polymerase II-specific);GO:0001228(DNA-binding transcription activator activity, RNA polymerase II-specific);GO:0002009(morphogenesis of an epithelium);GO:0003677(DNA binding);GO:0003682(chromatin binding);GO:0005515(protein binding);GO:0005634(nucleus);GO:0005737(cytoplasm);GO:0006355(regulation of transcription, DNA-templated);GO:0007417…		K18435		SRY (sex determining region Y)-box 9a [Source:ZFIN;Acc:ZDB-GENE-001103-1]		0.587486	0.272396	1.24603	0.15561	1.13089	1.77025	1.13317	1.04287	1.49724	0.0213186	0.899873	1.32471
ENSDARG00000003303	stc1	ENSDART00000025008	GO:0005179(hormone activity);GO:0005576(extracellular region);GO:0010469(regulation of signaling receptor activity)				stanniocalcin 1 [Source:ZFIN;Acc:ZDB-GENE-060825-79]		0	0	0.040902	0	0	0	0	0	0	0	0	0.213061
ENSDARG00000003307	stx16	ENSDART00000155934;ENSDART00000154738;ENSDART00000190452	GO:0000149(SNARE binding);GO:0005484(SNAP receptor activity);GO:0006886(intracellular protein transport);GO:0006906(vesicle fusion);GO:0012505(endomembrane system);GO:0016020(membrane);GO:0016021(integral component of membrane);GO:0016192(vesicle-mediated transport);GO:0031201(SNARE complex);GO:0039023(pronephric duct morphogenesis);GO:0048278(vesicle docking);GO:0048278(vesicle docking)	04130(SNARE interactions in vesicular transport);04130(SNARE interactions in vesicular transport)	K08489		syntaxin 16 [Source:ZFIN;Acc:ZDB-GENE-060810-113]		2.65396	3.61581	2.8548	2.40868	3.60764	4.28958	3.34294	4.323	1.7451	1.74507	3.31239	2.66481
ENSDARG00000003308	emc2	ENSDART00000023238	GO:0005515(protein binding);GO:0005634(nucleus);GO:0005737(cytoplasm);GO:0005783(endoplasmic reticulum);GO:0034975(protein folding in endoplasmic reticulum);GO:0072546(ER membrane protein complex)				ER membrane protein complex subunit 2 [Source:ZFIN;Acc:ZDB-GENE-040625-82]		27.8765	31.1442	21.6155	25.8415	18.8054	22.1516	16.2002	28.4898	14.0788	16.8317	21.5289	17.9373
ENSDARG00000003311	pank2	ENSDART00000133041	GO:0001944(vasculature development);GO:0004594(pantothenate kinase activity);GO:0005524(ATP binding);GO:0007399(nervous system development);GO:0015937(coenzyme A biosynthetic process);GO:0016310(phosphorylation)	00770(Pantothenate and CoA biosynthesis)	K09680	EC:2.7.1.33	pantothenate kinase 2 [Source:ZFIN;Acc:ZDB-GENE-070112-1952]		5.79226	4.02359	7.38875	3.74359	9.4858	8.2574	12.5468	22.3094	7.21186	3.04855	5.07034	6.651
ENSDARG00000003313	eps8l1b	ENSDART00000154135;ENSDART00000155735;ENSDART00000154214	GO:0003674(molecular_function);GO:0003779(actin binding);GO:0005515(protein binding);GO:0005575(cellular_component);GO:0005886(plasma membrane);GO:0007266(Rho protein signal transduction);GO:0008150(biological_process);GO:0030676(Rac guanyl-nucleotide exchange factor activity);GO:0032587(ruffle membrane);GO:0035023(regulation of Rho protein signal transduction);GO:1900029(positive regulation of r…		K17277		eps8 like 1b [Source:ZFIN;Acc:ZDB-GENE-050506-143]		1.65278	8.83384	7.94493	0.187457	3.35614	2.99103	1.3001	1.45852	0.945857	0.378977	5.53645	3.85564
ENSDARG00000003320	fam91a1	ENSDART00000019459	GO:0005794(Golgi apparatus);GO:0005802(trans-Golgi network);GO:0006886(intracellular protein transport);GO:0031410(cytoplasmic vesicle)				family with sequence similarity 91 member A1 [Source:ZFIN;Acc:ZDB-GENE-040426-1187]		4.95972	8.39826	4.29447	7.18503	3.27384	4.1885	2.89903	4.81112	2.27288	3.85511	4.92648	3.52415
ENSDARG00000003326	cacng5a	ENSDART00000017774	GO:0005244(voltage-gated ion channel activity);GO:0005245(voltage-gated calcium channel activity);GO:0005262(calcium channel activity);GO:0006811(ion transport);GO:0006816(calcium ion transport);GO:0016020(membrane);GO:0016021(integral component of membrane);GO:0016247(channel regulator activity);GO:0019226(transmission of nerve impulse);GO:0032281(AMPA glutamate receptor complex);GO:0034765(regu…	04010(MAPK signaling pathway);04260(Cardiac muscle contraction);04261(Adrenergic signaling in cardiomyocytes)	K04870		calcium channel, voltage-dependent, gamma subunit 5a [Source:ZFIN;Acc:ZDB-GENE-120104-4]		0.097752	0.144497	0.115878	0.127128	0	0	0	0.063733	0	0.100448	0	0.174525
ENSDARG00000003328	slf2	ENSDART00000136689;ENSDART00000138362					SMC5-SMC6 complex localization factor 2 [Source:ZFIN;Acc:ZDB-GENE-081107-61]		2.28144	2.55409	1.61309	2.93873	2.54134	3.77752	2.37608	4.69306	1.3454	1.56156	3.33992	1.87548
ENSDARG00000003344	trpc2b	ENSDART00000050172	GO:0005216(ion channel activity);GO:0005262(calcium channel activity);GO:0005887(integral component of plasma membrane);GO:0006811(ion transport);GO:0006828(manganese ion transport);GO:0007338(single fertilization);GO:0015279(store-operated calcium channel activity);GO:0016020(membrane);GO:0016021(integral component of membrane);GO:0034703(cation channel complex);GO:0051480(regulation of cytosoli…		K04965		transient receptor potential cation channel subfamily C member 2b [Source:ZFIN;Acc:ZDB-GENE-050712-3]		0	0	0.043516	0	0	0	0.032915	0.077863	0	0	0	0
ENSDARG00000003373	commd2	ENSDART00000012212	GO:0003674(molecular_function);GO:0005575(cellular_component);GO:0008150(biological_process)		K22558		COMM domain containing 2 [Source:ZFIN;Acc:ZDB-GENE-040718-118]		13.5508	15.8827	12.9419	20.7078	12.3777	10.4441	6.63324	12.9508	8.00111	12.6772	10.891	6.12415
ENSDARG00000003375	gng12a	ENSDART00000149584;ENSDART00000150166	GO:0003924(GTPase activity);GO:0005834(heterotrimeric G-protein complex);GO:0005886(plasma membrane);GO:0007165(signal transduction);GO:0007186(G protein-coupled receptor signaling pathway);GO:0016020(membrane);GO:0030165(PDZ domain binding);GO:0042301(phosphate ion binding);GO:0042301(phosphate ion binding)	04010(MAPK signaling pathway);04371(Apelin signaling pathway);04810(Regulation of actin cytoskeleton);04810(Regulation of actin cytoskeleton)	K04347		guanine nucleotide binding protein (G protein), gamma 12a [Source:ZFIN;Acc:ZDB-GENE-040426-2555]		3.40818	8.01328	5.50322	2.2999	4.14086	3.22689	3.7289	8.86148	2.17967	1.60623	3.74851	3.03058
ENSDARG00000003380	PAOX	ENSDART00000012457;ENSDART00000143260;ENSDART00000131466	GO:0016491(oxidoreductase activity);GO:0046208(spermine catabolic process);GO:0046592(polyamine oxidase activity);GO:0055114(oxidation-reduction process);GO:0055114(oxidation-reduction process)	04146(Peroxisome);04146(Peroxisome)	K00308	EC:1.5.3.13	si:dkey-275b16.2 [Source:ZFIN;Acc:ZDB-GENE-090312-204]		1.93077	0.467585	0.877641	0.238935	0.626121	1.28291	3.38238	3.78592	0.693944	0.618071	1.05057	0.858853
ENSDARG00000003381	si:ch211-266g18	ENSDART00000052439;ENSDART00000156623	GO:0006886(intracellular protein transport);GO:0006887(exocytosis);GO:0017137(Rab GTPase binding);GO:0070382(exocytic vesicle);GO:0070382(exocytic vesicle)		K17598		si:ch211-266g18.6 [Source:ZFIN;Acc:ZDB-GENE-131121-599]		2.55038	4.79114	3.21488	4.71636	5.28332	9.26745	4.62209	2.17731	3.07088	2.17113	10.1489	5.43551
ENSDARG00000003382	cwc25	ENSDART00000100924					CWC25 spliceosome-associated protein homolog (S. cerevisiae) [Source:ZFIN;Acc:ZDB-GENE-040426-2817]		9.47142	22.8996	33.929	19.2658	11.5493	10.325	7.61025	15.035	7.40146	10.0567	9.42846	6.14428
ENSDARG00000003383	asb8	ENSDART00000188394;ENSDART00000013797;ENSDART00000137229;ENSDART00000145007	GO:0005515(protein binding);GO:0016567(protein ubiquitination);GO:0035556(intracellular signal transduction);GO:0035556(intracellular signal transduction)		K10330		ankyrin repeat and SOCS box containing 8 [Source:ZFIN;Acc:ZDB-GENE-030131-5411]		6.28258	8.20949	3.05197	15.142	4.09936	3.27228	3.18404	4.66293	2.98726	6.77076	3.32464	3.44264
ENSDARG00000003395	col4a3	ENSDART00000156697;ENSDART00000049849	GO:0005201(extracellular matrix structural constituent);GO:0005581(collagen trimer);GO:0005594(collagen type IX trimer);GO:0005604(basement membrane);GO:0005615(extracellular space);GO:0030198(extracellular matrix organization);GO:0031012(extracellular matrix);GO:0031012(extracellular matrix)				collagen, type IV, alpha 3 [Source:ZFIN;Acc:ZDB-GENE-070802-4]		0.0488027	0.303828	0.01332	0.300969	0	0.0379762	0.103398	0.171442	0.0110429	0.183922	0.0397301	0
ENSDARG00000003398	rbpja	ENSDART00000005067	GO:0000122(negative regulation of transcription by RNA polymerase II);GO:0000978(RNA polymerase II proximal promoter sequence-specific DNA binding);GO:0001103(RNA polymerase II repressing transcription factor binding);GO:0001228(DNA-binding transcription activator activity, RNA polymerase II-specific);GO:0001756(somitogenesis);GO:0001757(somite specification);GO:0002040(sprouting angiogenesis);GO…	04330(Notch signaling pathway)	K06053		recombination signal binding protein for immunoglobulin kappa J region a [Source:ZFIN;Acc:ZDB-GENE-031117-1]		3.70182	4.14332	2.59936	7.12651	2.79211	4.09486	2.35684	4.15935	2.24794	3.5512	3.77246	2.44622
ENSDARG00000003399	fgf8a	ENSDART00000025583	GO:0001708(cell fate specification);GO:0001756(somitogenesis);GO:0003007(heart morphogenesis);GO:0003208(cardiac ventricle morphogenesis);GO:0005104(fibroblast growth factor receptor binding);GO:0005576(extracellular region);GO:0005615(extracellular space);GO:0005764(lysosome);GO:0007368(determination of left/right symmetry);GO:0007420(brain development);GO:0007422(peripheral nervous system devel…	04010(MAPK signaling pathway);04810(Regulation of actin cytoskeleton)	K04358		fibroblast growth factor 8a [Source:ZFIN;Acc:ZDB-GENE-990415-72]		0.258384	0.510502	0	0.602289	0	0.182463	0	0.689824	0	0.507232	0.116319	0.263148
ENSDARG00000003403	tenm1	ENSDART00000144198;ENSDART00000040184	GO:0007157(heterophilic cell-cell adhesion via plasma membrane cell adhesion molecules);GO:0007165(signal transduction);GO:0016020(membrane);GO:0016021(integral component of membrane);GO:0042803(protein homodimerization activity);GO:0043005(neuron projection);GO:0046982(protein heterodimerization activity);GO:0048666(neuron development);GO:0050839(cell adhesion molecule binding);GO:0050839(cell a…				teneurin transmembrane protein 1 [Source:ZFIN;Acc:ZDB-GENE-060531-26]		1.49203	0.289034	0.146995	0.174069	1.07991	0.613612	1.11955	3.6269	0.142102	0.227233	3.07079	0.148823
ENSDARG00000003411	foxa2	ENSDART00000014296	GO:0003677(DNA binding);GO:0003700(DNA-binding transcription factor activity);GO:0005634(nucleus);GO:0006355(regulation of transcription, DNA-templated);GO:0008134(transcription factor binding);GO:0019904(protein domain specific binding);GO:0043565(sequence-specific DNA binding)		K08035		forkhead box A2 [Source:ZFIN;Acc:ZDB-GENE-980526-404]		9.02423	6.26288	0.049807	0.280456	0	0.101692	0.56251	10.9463	0	4.60194	0	0
ENSDARG00000003414	capslb	ENSDART00000133190	GO:0005509(calcium ion binding);GO:0005575(cellular_component)				calcyphosine-like b [Source:ZFIN;Acc:ZDB-GENE-050417-298]		0.096715	0.133654	0.503969	0	0.299436	0	2.03899	7.20907	0.309905	0.146204	0.55147	0.078266
ENSDARG00000003420	chrna5	ENSDART00000021372;ENSDART00000185249	GO:0004888(transmembrane signaling receptor activity);GO:0005216(ion channel activity);GO:0005230(extracellular ligand-gated ion channel activity);GO:0005886(plasma membrane);GO:0005887(integral component of plasma membrane);GO:0005892(acetylcholine-gated channel complex);GO:0006811(ion transport);GO:0007165(signal transduction);GO:0007268(chemical synaptic transmission);GO:0007271(synaptic trans…	04080(Neuroactive ligand-receptor interaction);04080(Neuroactive ligand-receptor interaction)	K04807		cholinergic receptor, nicotinic, alpha 5 [Source:ZFIN;Acc:ZDB-GENE-050417-440]		0.310958	0.16075	0	0.154814	0.035932	0.06608	0.36832	0.301468	0.029153	0.116661	0.101182	0
ENSDARG00000003421	igf2bp2a	ENSDART00000180832;ENSDART00000102419;ENSDART00000191372;ENSDART00000128931;ENSDART00000193667;ENSDART00000182695	GO:0003676(nucleic acid binding);GO:0003723(RNA binding);GO:0003729(mRNA binding);GO:0003729(mRNA binding)		K17392		insulin-like growth factor 2 mRNA binding protein 2a [Source:ZFIN;Acc:ZDB-GENE-070912-44]		1.80626	5.19036	4.41071	3.42767	0.462991	0.824285	0.834352	1.76036	0.463686	1.35727	0.299808	0.144663
ENSDARG00000003429	hnrnpdl	ENSDART00000148277;ENSDART00000020631;ENSDART00000189017;ENSDART00000146539;ENSDART00000132284;ENSDART00000137853	GO:0003676(nucleic acid binding);GO:0003723(RNA binding);GO:0005654(nucleoplasm);GO:0008143(poly(A) binding);GO:0034046(poly(G) binding);GO:0043565(sequence-specific DNA binding);GO:1990837(sequence-specific double-stranded DNA binding);GO:1990904(ribonucleoprotein complex);GO:1990904(ribonucleoprotein complex)		K13044		heterogeneous nuclear ribonucleoprotein D-like [Source:ZFIN;Acc:ZDB-GENE-040426-2717]		47.0375	62.849	94.6686	47.0751	99.8114	100.239	75.1908	78.0215	74.7055	28.3962	106.243	79.9685
ENSDARG00000003444	dhrs7	ENSDART00000005670	GO:0005575(cellular_component);GO:0016491(oxidoreductase activity);GO:0055114(oxidation-reduction process)		K11165	EC:1.1.-.-	dehydrogenase/reductase (SDR family) member 7 [Source:ZFIN;Acc:ZDB-GENE-060825-21]		16.1602	24.9091	27.1612	3.53578	17.7352	9.67345	19.9481	31.6787	11.9514	9.82167	11.5535	6.27199
ENSDARG00000003446	ippk	ENSDART00000131217	GO:0000166(nucleotide binding);GO:0005524(ATP binding);GO:0005634(nucleus);GO:0005737(cytoplasm);GO:0005813(centrosome);GO:0007275(multicellular organism development);GO:0007368(determination of left/right symmetry);GO:0016301(kinase activity);GO:0016310(phosphorylation);GO:0016740(transferase activity);GO:0032402(melanosome transport);GO:0032958(inositol phosphate biosynthetic process);GO:003529…	00562(Inositol phosphate metabolism);04070(Phosphatidylinositol signaling system)	K10572	EC:2.7.1.158	inositol 1,3,4,5,6-pentakisphosphate 2-kinase [Source:ZFIN;Acc:ZDB-GENE-050327-41]		8.55446	18.8544	14.0597	16.3203	3.65041	8.08204	3.24441	5.59846	3.2185	7.60947	9.43193	3.57638
ENSDARG00000003449	pde10a	ENSDART00000144312;ENSDART00000161684	GO:0004114(3',5'-cyclic-nucleotide phosphodiesterase activity);GO:0004118(cGMP-stimulated cyclic-nucleotide phosphodiesterase activity);GO:0005515(protein binding);GO:0007165(signal transduction);GO:0008081(phosphoric diester hydrolase activity);GO:0010754(negative regulation of cGMP-mediated signaling);GO:0016787(hydrolase activity);GO:0030552(cAMP binding);GO:0046872(metal ion binding);GO:00468…	00230(Purine metabolism);00230(Purine metabolism)	K18438	3.1.4.35;EC:3.1.4.17	phosphodiesterase 10A [Source:ZFIN;Acc:ZDB-GENE-040426-1115]		0.597372	0.86023	0.88521	1.70708	0.168175	0.642704	0.27239	0.490284	0.290621	0.499763	0.290817	0.0788931
ENSDARG00000003462	fech	ENSDART00000148540	GO:0004325(ferrochelatase activity);GO:0005739(mitochondrion);GO:0006779(porphyrin-containing compound biosynthetic process);GO:0006783(heme biosynthetic process);GO:0016829(lyase activity);GO:0043249(erythrocyte maturation)	00860(Porphyrin and chlorophyll metabolism)	K01772	4.99.1.9;EC:4.99.1.1	ferrochelatase [Source:ZFIN;Acc:ZDB-GENE-000928-1]		2.11343	6.2042	1.41855	8.36416	0.336538	0.319043	0.978618	0.880967	0.477832	2.16378	0.388056	0.159956
ENSDARG00000003469	neurod4	ENSDART00000145072	GO:0001839(neural plate morphogenesis);GO:0003677(DNA binding);GO:0005634(nucleus);GO:0006355(regulation of transcription, DNA-templated);GO:0007275(multicellular organism development);GO:0007399(nervous system development);GO:0021986(habenula development);GO:0030154(cell differentiation);GO:0046983(protein dimerization activity);GO:0048666(neuron development);GO:0050769(positive regulation of ne…		K09079		neuronal differentiation 4 [Source:ZFIN;Acc:ZDB-GENE-030730-1]		0.136852	0.054096	0.028181	0.02305	0.481664	0.034724	0	0.030278	0	0	0	0
ENSDARG00000003475	sult1st5	ENSDART00000046933;ENSDART00000146231;ENSDART00000135559	GO:0006805(xenobiotic metabolic process);GO:0008146(sulfotransferase activity);GO:0016740(transferase activity);GO:0016740(transferase activity)		K01025	EC:2.8.2.-	sulfotransferase family 1, cytosolic sulfotransferase 5 [Source:ZFIN;Acc:ZDB-GENE-050809-2]		5.29388	5.45812	4.86359	0.821523	6.34716	7.80239	3.98699	11.4349	2.49365	1.06533	7.58625	4.71813
ENSDARG00000003486	ppp1caa	ENSDART00000025046	GO:0000164(protein phosphatase type 1 complex);GO:0004721(phosphoprotein phosphatase activity);GO:0004722(protein serine/threonine phosphatase activity);GO:0005634(nucleus);GO:0005737(cytoplasm);GO:0006470(protein dephosphorylation);GO:0008157(protein phosphatase 1 binding);GO:0016787(hydrolase activity);GO:0042752(regulation of circadian rhythm);GO:0043153(entrainment of circadian clock by photo…	03015(mRNA surveillance pathway);04114(Oocyte meiosis);04218(Cellular senescence);04261(Adrenergic signaling in cardiomyocytes);04270(Vascular smooth muscle contraction);04510(Focal adhesion);04810(Regulation of actin cytoskeleton);04910(Insulin signaling pathway);05168(Herpes simplex virus 1 infection)	K06269	EC:3.1.3.16	protein phosphatase 1, catalytic subunit, alpha isozyme a [Source:ZFIN;Acc:ZDB-GENE-040516-3]		18.6356	25.047	15.3434	28.9591	13.8651	12.1299	10.3618	33.5221	8.50262	17.4393	15.2192	10.8492
ENSDARG00000003487	nup93	ENSDART00000144960;ENSDART00000025782;ENSDART00000179783	GO:0005634(nucleus);GO:0005643(nuclear pore);GO:0006913(nucleocytoplasmic transport);GO:0015031(protein transport);GO:0016020(membrane);GO:0017056(structural constituent of nuclear pore);GO:0051028(mRNA transport);GO:0051028(mRNA transport)	03013(RNA transport);03013(RNA transport)	K14309		nucleoporin 93 [Source:ZFIN;Acc:ZDB-GENE-990415-46]		6.36085	9.34973	3.81905	15.7342	3.09608	3.25426	4.11363	7.5985	1.74104	8.6699	2.85469	3.05039
ENSDARG00000003495	madd	ENSDART00000173673;ENSDART00000173454;ENSDART00000047208;ENSDART00000174546;ENSDART00000173605;ENSDART00000173526;ENSDART00000173988;ENSDART00000173816	GO:0017112(Rab guanyl-nucleotide exchange factor activity);GO:0032483(regulation of Rab protein signal transduction);GO:0032483(regulation of Rab protein signal transduction)				MAP-kinase activating death domain [Source:ZFIN;Acc:ZDB-GENE-030131-8076]		3.30862	5.76192	3.17339	5.79591	3.1881	3.2936	2.38893	2.66461	2.1441	2.94125	3.23083	1.88373
ENSDARG00000003512	anks1b	ENSDART00000133509;ENSDART00000169704;ENSDART00000144956;ENSDART00000143656;ENSDART00000140682	GO:0005515(protein binding);GO:0005737(cytoplasm);GO:0016020(membrane);GO:1900383(regulation of synaptic plasticity by receptor localization to synapse);GO:1900383(regulation of synaptic plasticity by receptor localization to synapse)		K21413		ankyrin repeat and sterile alpha motif domain containing 1B [Source:ZFIN;Acc:ZDB-GENE-041210-349]		0.565106	0.907707	2.7621	0.527068	2.00971	2.96182	2.07632	1.68193	1.57583	0.547629	1.74108	1.83651
ENSDARG00000003517	impa1	ENSDART00000010683;ENSDART00000131411;ENSDART00000137933	GO:0006021(inositol biosynthetic process);GO:0007165(signal transduction);GO:0008934(inositol monophosphate 1-phosphatase activity);GO:0016787(hydrolase activity);GO:0046854(phosphatidylinositol phosphorylation);GO:0046855(inositol phosphate dephosphorylation);GO:0046872(metal ion binding);GO:0052832(inositol monophosphate 3-phosphatase activity);GO:0052833(inositol monophosphate 4-phosphatase ac…	00562(Inositol phosphate metabolism);04070(Phosphatidylinositol signaling system);04070(Phosphatidylinositol signaling system)	K01092	EC:3.1.3.25	inositol monophosphatase 1 [Source:ZFIN;Acc:ZDB-GENE-040718-245]		6.92521	10.2866	30.706	6.17647	8.37037	5.54208	3.36317	5.42224	2.60942	5.28318	7.53144	6.5059
ENSDARG00000003519	aprt	ENSDART00000168721;ENSDART00000148514;ENSDART00000013796	GO:0002055(adenine binding);GO:0003999(adenine phosphoribosyltransferase activity);GO:0005737(cytoplasm);GO:0006168(adenine salvage);GO:0009116(nucleoside metabolic process);GO:0016208(AMP binding);GO:0044209(AMP salvage);GO:0044209(AMP salvage)	00230(Purine metabolism);00230(Purine metabolism)	K00759	EC:2.4.2.7	adenine phosphoribosyltransferase [Source:ZFIN;Acc:ZDB-GENE-040426-1492]		9.05234	13.829	2.63451	6.27671	1.5363	5.77177	2.82203	4.30769	1.08092	3.8889	2.81989	2.24607
ENSDARG00000003520	tbc1d14	ENSDART00000133420;ENSDART00000189682;ENSDART00000144993	GO:0005096(GTPase activator activity);GO:0005623(cell);GO:0006886(intracellular protein transport);GO:0017137(Rab GTPase binding);GO:0090630(activation of GTPase activity);GO:0090630(activation of GTPase activity)		K20167		TBC1 domain family, member 14 [Source:ZFIN;Acc:ZDB-GENE-030131-6136]		4.51599	8.92683	2.42001	15.4448	2.39103	3.00973	1.77989	4.29368	0.998736	7.66017	2.44636	2.38786
ENSDARG00000003523	itln3	ENSDART00000003040;ENSDART00000165193;ENSDART00000171669					intelectin 3 [Source:ZFIN;Acc:ZDB-GENE-090527-4]		21.2097	46.6316	0.037835	0.605293	0.18056	0.149858	0.289972	3.67141	0	34.9708	0.0904133	0.247268
ENSDARG00000003526	psma5	ENSDART00000020655;ENSDART00000141477;ENSDART00000146495	GO:0000502(proteasome complex);GO:0004175(endopeptidase activity);GO:0004298(threonine-type endopeptidase activity);GO:0005634(nucleus);GO:0005737(cytoplasm);GO:0005839(proteasome core complex);GO:0006508(proteolysis);GO:0006511(ubiquitin-dependent protein catabolic process);GO:0008233(peptidase activity);GO:0010498(proteasomal protein catabolic process);GO:0010499(proteasomal ubiquitin-independe…	03050(Proteasome);03050(Proteasome)	K02729	EC:3.4.25.1	proteasome subunit alpha 5 [Source:ZFIN;Acc:ZDB-GENE-040625-96]		45.5565	77.472	122.346	58.7422	74.9157	38.486	27.6403	28.7724	17.774	36.0297	49.7781	31.0796
ENSDARG00000003527	mak16	ENSDART00000113837;ENSDART00000148676;ENSDART00000149904	GO:0005634(nucleus);GO:0005730(nucleolus);GO:0005730(nucleolus)		K14831		MAK16 homolog (S. cerevisiae) [Source:ZFIN;Acc:ZDB-GENE-020419-35]		14.2847	24.477	8.2284	26.0557	3.35695	4.78931	3.86917	6.76725	2.47131	10.8722	5.17196	3.82096
ENSDARG00000003531	tcea1	ENSDART00000101861;ENSDART00000186387	GO:0003676(nucleic acid binding);GO:0003746(translation elongation factor activity);GO:0005634(nucleus);GO:0006351(transcription, DNA-templated);GO:0006355(regulation of transcription, DNA-templated);GO:0006414(translational elongation);GO:0008270(zinc ion binding);GO:0046872(metal ion binding);GO:0046872(metal ion binding)		K03145		transcription elongation factor A (SII), 1 [Source:ZFIN;Acc:ZDB-GENE-030131-8049]		8.12692	16.3776	4.48384	26.9804	3.95184	5.2581	3.5442	4.87338	2.37408	11.71	4.99567	4.13418
ENSDARG00000003533	col8a1b	ENSDART00000019846;ENSDART00000154717;ENSDART00000182377	GO:0005201(extracellular matrix structural constituent);GO:0005515(protein binding);GO:0005576(extracellular region);GO:0005581(collagen trimer);GO:0005615(extracellular space);GO:0030198(extracellular matrix organization);GO:0031012(extracellular matrix);GO:0031012(extracellular matrix)				collagen, type VIII, alpha 1b [Source:ZFIN;Acc:ZDB-GENE-060503-140]		0.397962	0.514127	0.529325	0.0431504	2.27096	1.24772	4.75607	3.86823	0.55889	0.257008	0.424719	1.40879
ENSDARG00000003544	adarb1b	ENSDART00000185579;ENSDART00000193087;ENSDART00000145616	GO:0003723(RNA binding);GO:0003725(double-stranded RNA binding);GO:0003726(double-stranded RNA adenosine deaminase activity);GO:0004000(adenosine deaminase activity);GO:0005634(nucleus);GO:0005730(nucleolus);GO:0005737(cytoplasm);GO:0006382(adenosine to inosine editing);GO:0006396(RNA processing);GO:0008251(tRNA-specific adenosine deaminase activity);GO:0008251(tRNA-specific adenosine deaminase a…		K13194	EC:3.5.-.-	adenosine deaminase, RNA-specific, B1b [Source:ZFIN;Acc:ZDB-GENE-030219-15]		1.69764	1.72705	0.410723	4.12065	0.0991885	0.280591	0.111998	0.310591	0.101773	1.51957	0.3004	0.159608
ENSDARG00000003553	gnrhr2	ENSDART00000006795	GO:0004930(G protein-coupled receptor activity);GO:0004968(gonadotropin-releasing hormone receptor activity);GO:0005887(integral component of plasma membrane);GO:0007186(G protein-coupled receptor signaling pathway);GO:0016020(membrane);GO:0016021(integral component of membrane);GO:0016500(protein-hormone receptor activity);GO:0032870(cellular response to hormone stimulus);GO:0097211(cellular res…	04080(Neuroactive ligand-receptor interaction);04912(GnRH signaling pathway)	K04280		gonadotropin releasing hormone receptor 2 [Source:ZFIN;Acc:ZDB-GENE-090128-3]		0.023372	0.054701	0.034588	0	0	0	0	0.139197	0	0.016344	0	0
ENSDARG00000003564	dohh	ENSDART00000018515	GO:0004497(monooxygenase activity);GO:0008612(peptidyl-lysine modification to peptidyl-hypusine);GO:0016491(oxidoreductase activity);GO:0019135(deoxyhypusine monooxygenase activity);GO:0046872(metal ion binding);GO:0055114(oxidation-reduction process)		K06072	EC:1.14.99.29	deoxyhypusine hydroxylase/monooxygenase [Source:ZFIN;Acc:ZDB-GENE-030131-451]		27.4765	37.4638	20.0174	38.3548	16.9186	20.5149	13.5899	24.5746	16.0608	26.468	16.7571	11.6082
ENSDARG00000003570	hsp90b1	ENSDART00000004879	GO:0001666(response to hypoxia);GO:0005515(protein binding);GO:0005524(ATP binding);GO:0005783(endoplasmic reticulum);GO:0006457(protein folding);GO:0048471(perinuclear region of cytoplasm);GO:0050830(defense response to Gram-positive bacterium);GO:0051082(unfolded protein binding)	04141(Protein processing in endoplasmic reticulum)	K09487		heat shock protein 90, beta (grp94), member 1 [Source:ZFIN;Acc:ZDB-GENE-031002-1]		238.035	489.964	90.77	779.021	54.509	51.241	31.0334	38.0321	27.8968	401.984	136.025	52.8585
ENSDARG00000003573	dctn5	ENSDART00000010944	GO:0005575(cellular_component)		K10427		dynactin 5 [Source:ZFIN;Acc:ZDB-GENE-040718-201]		11.6663	20.7034	22.5076	25.4064	8.314	9.0807	7.82161	12.5189	4.09363	11.5195	7.82801	6.23228
ENSDARG00000003576	klhl32	ENSDART00000017562;ENSDART00000143873	GO:0005515(protein binding);GO:0005515(protein binding)		K10468		kelch-like family member 32 [Source:ZFIN;Acc:ZDB-GENE-070209-47]		2.85203	0.900479	2.13972	0.582708	1.23646	1.77719	1.09201	1.99179	1.07709	0.650531	0.929494	0.880247
ENSDARG00000003584	pla2g7	ENSDART00000016090;ENSDART00000153402	GO:0003847(1-alkyl-2-acetylglycerophosphocholine esterase activity);GO:0006629(lipid metabolic process);GO:0016042(lipid catabolic process);GO:0016787(hydrolase activity);GO:0016787(hydrolase activity)	00565(Ether lipid metabolism);00565(Ether lipid metabolism)	K01062	EC:3.1.1.47	phospholipase A2, group VII (platelet-activating factor acetylhydrolase, plasma) [Source:ZFIN;Acc:ZDB-GENE-040426-2248]		7.8732	18.8029	18.3184	4.49496	14.1764	19.3501	8.25732	10.1994	4.8667	4.4069	22.7983	11.193
ENSDARG00000003592	surf1	ENSDART00000011337;ENSDART00000146223;ENSDART00000135533	GO:0004129(cytochrome-c oxidase activity);GO:0005739(mitochondrion);GO:0005743(mitochondrial inner membrane);GO:0016020(membrane);GO:0021522(spinal cord motor neuron differentiation);GO:0022900(electron transport chain);GO:0048568(embryonic organ development);GO:1902600(proton transmembrane transport);GO:1902600(proton transmembrane transport)		K14998		surfeit 1 [Source:ZFIN;Acc:ZDB-GENE-041108-2]		11.551	14.4303	7.89247	17.1457	9.82132	12.8107	6.63524	8.43794	9.24083	9.51775	12.1411	8.37649
ENSDARG00000003599	rpl3	ENSDART00000011251;ENSDART00000186457;ENSDART00000138327;ENSDART00000147048	GO:0000027(ribosomal large subunit assembly);GO:0003735(structural constituent of ribosome);GO:0005622(intracellular);GO:0005840(ribosome);GO:0006412(translation);GO:0022625(cytosolic large ribosomal subunit);GO:0031017(exocrine pancreas development);GO:0031017(exocrine pancreas development)	03010(Ribosome);03010(Ribosome)	K02925		ribosomal protein L3 [Source:ZFIN;Acc:ZDB-GENE-030131-1291]		1190.4	760.051	808.528	367.372	958.274	1183.24	1027.46	1500.14	921.593	630.384	1034.32	900.486
ENSDARG00000003607	nr2f6a	ENSDART00000022379;ENSDART00000133818;ENSDART00000135323	GO:0003677(DNA binding);GO:0003700(DNA-binding transcription factor activity);GO:0003707(steroid hormone receptor activity);GO:0005634(nucleus);GO:0006355(regulation of transcription, DNA-templated);GO:0008270(zinc ion binding);GO:0043401(steroid hormone mediated signaling pathway);GO:0043565(sequence-specific DNA binding);GO:0046872(metal ion binding);GO:0046872(metal ion binding)		K08549		nuclear receptor subfamily 2, group F, member 6a [Source:ZFIN;Acc:ZDB-GENE-030131-4362]		4.23842	4.58658	2.88294	5.14596	2.37888	2.4575	2.62638	6.05609	1.78188	2.6474	1.80883	2.02958
ENSDARG00000003615	slc26a3	ENSDART00000101043;ENSDART00000138662	GO:0005887(integral component of plasma membrane);GO:0006821(chloride transport);GO:0008271(secondary active sulfate transmembrane transporter activity);GO:0008272(sulfate transport);GO:0015106(bicarbonate transmembrane transporter activity);GO:0015108(chloride transmembrane transporter activity);GO:0015116(sulfate transmembrane transporter activity);GO:0015297(antiporter activity);GO:0015301(ani…		K14078		solute carrier family 26 (anion exchanger), member 3, tandem duplicate 2 [Source:ZFIN;Acc:ZDB-GENE-041210-179]		11.8121	2.64221	0.0602801	0.553542	0.0325485	0.0466015	12.8155	32.9046	0.0359135	3.38836	0	0.0196247
ENSDARG00000003616	arih1	ENSDART00000019581	GO:0000151(ubiquitin ligase complex);GO:0000209(protein polyubiquitination);GO:0004842(ubiquitin-protein transferase activity);GO:0005634(nucleus);GO:0005737(cytoplasm);GO:0006511(ubiquitin-dependent protein catabolic process);GO:0008270(zinc ion binding);GO:0016567(protein ubiquitination);GO:0016604(nuclear body);GO:0016740(transferase activity);GO:0019005(SCF ubiquitin ligase complex);GO:003146…		K11968	EC:2.3.2.31	ariadne ubiquitin-conjugating enzyme E2 binding protein homolog 1 (Drosophila) [Source:ZFIN;Acc:ZDB-GENE-030131-5213]		8.83956	12.086	13.9134	16.4814	9.99756	8.3081	7.25837	12.3265	5.51907	7.77827	4.30192	5.51053
ENSDARG00000003631	clockb	ENSDART00000133959;ENSDART00000144403;ENSDART00000012552;ENSDART00000133758;ENSDART00000136307	GO:0003677(DNA binding);GO:0003700(DNA-binding transcription factor activity);GO:0005515(protein binding);GO:0005634(nucleus);GO:0005667(transcription factor complex);GO:0005737(cytoplasm);GO:0006355(regulation of transcription, DNA-templated);GO:0007623(circadian rhythm);GO:0009416(response to light stimulus);GO:0009648(photoperiodism);GO:0046983(protein dimerization activity);GO:0046983(protein…		K02223	EC:2.3.1.48	clock circadian regulator b [Source:ZFIN;Acc:ZDB-GENE-030408-2]		2.20154	2.68875	2.53874	1.1629	2.3118	4.32852	2.26467	4.0548	2.35894	0.810852	2.18492	2.41239
ENSDARG00000003632	zgc:172270	ENSDART00000023323	GO:0000139(Golgi membrane);GO:0003674(molecular_function);GO:0005198(structural molecule activity);GO:0005737(cytoplasm);GO:0005794(Golgi apparatus);GO:0005886(plasma membrane);GO:0005887(integral component of plasma membrane);GO:0005901(caveola);GO:0005925(focal adhesion);GO:0016020(membrane);GO:0016021(integral component of membrane);GO:0030154(cell differentiation);GO:0032947(protein-containin…				zgc:172270 [Source:ZFIN;Acc:ZDB-GENE-080204-67]		2.59893	0.538809	5.31238	0.345535	4.90646	10.4015	3.7679	2.34324	3.82326	0.532215	7.33548	9.21842
ENSDARG00000003635	mogat3b	ENSDART00000015136	GO:0016020(membrane);GO:0016021(integral component of membrane);GO:0016747(transferase activity, transferring acyl groups other than amino-acyl groups)				monoacylglycerol O-acyltransferase 3b [Source:ZFIN;Acc:ZDB-GENE-110302-2]		5.56635	8.37228	5.97104	0.775361	4.7908	4.95839	12.8648	23.3414	1.51849	2.6496	5.67766	2.54288
ENSDARG00000003641	tfg	ENSDART00000112398;ENSDART00000013591	GO:0000139(Golgi membrane);GO:0005515(protein binding);GO:0005737(cytoplasm);GO:0006888(endoplasmic reticulum to Golgi vesicle-mediated transport);GO:0042802(identical protein binding);GO:0048208(COPII vesicle coating);GO:0048208(COPII vesicle coating)				trk-fused gene [Source:ZFIN;Acc:ZDB-GENE-030131-8410]		28.5525	44.5037	44.551	56.0906	34.1786	24.989	16.5884	20.2534	11.3079	23.1609	28.9546	19.7083
ENSDARG00000003642	zfyve19	ENSDART00000013093	GO:0005575(cellular_component);GO:0005813(centrosome);GO:0009838(abscission);GO:0030496(midbody);GO:0032154(cleavage furrow);GO:0032266(phosphatidylinositol-3-phosphate binding);GO:0044878(mitotic cytokinesis checkpoint);GO:0046872(metal ion binding)				zinc finger, FYVE domain containing 19 [Source:ZFIN;Acc:ZDB-GENE-040718-109]		9.13722	11.504	4.33527	15.79	8.23411	7.43615	7.79114	10.9436	4.65042	8.73422	8.14576	4.63548
ENSDARG00000003655	tmem59l	ENSDART00000027345	GO:0003674(molecular_function);GO:0016020(membrane);GO:0016021(integral component of membrane);GO:0048675(axon extension)				transmembrane protein 59-like [Source:ZFIN;Acc:ZDB-GENE-040426-2651]		8.10833	17.2004	3.75272	24.3064	2.40431	3.55664	2.03008	1.98463	2.55509	11.9195	2.08549	2.5907
ENSDARG00000003675	cryl1	ENSDART00000130023;ENSDART00000062656;ENSDART00000180081	GO:0003857(3-hydroxyacyl-CoA dehydrogenase activity);GO:0005575(cellular_component);GO:0006631(fatty acid metabolic process);GO:0016491(oxidoreductase activity);GO:0055114(oxidation-reduction process);GO:0070403(NAD+ binding);GO:0070403(NAD+ binding)	00040(Pentose and glucuronate interconversions);00040(Pentose and glucuronate interconversions)	K13247	EC:1.1.1.45	crystallin, lambda 1 [Source:ZFIN;Acc:ZDB-GENE-060810-7]		6.50777	4.68322	2.29508	4.05786	2.67898	3.58131	4.73397	12.0855	3.0244	4.13076	4.42791	2.70174
ENSDARG00000003680	runx1t1	ENSDART00000183477;ENSDART00000162517;ENSDART00000147226;ENSDART00000123270;ENSDART00000151521;ENSDART00000151192;ENSDART00000010294	GO:0003700(DNA-binding transcription factor activity);GO:0003714(transcription corepressor activity);GO:0004674(protein serine/threonine kinase activity);GO:0005737(cytoplasm);GO:0006355(regulation of transcription, DNA-templated);GO:0007346(regulation of mitotic cell cycle);GO:0043066(negative regulation of apoptotic process);GO:0045892(negative regulation of transcription, DNA-templated);GO:004…				runt-related transcription factor 1; translocated to, 1 (cyclin D-related) [Source:ZFIN;Acc:ZDB-GENE-060929-164]		0.565307	0.869712	0.482842	0.277637	0.49513	0.578177	0.569399	0.889536	0.552564	0.464219	0.453956	0.1015
ENSDARG00000003681	eif5	ENSDART00000185605;ENSDART00000019476;ENSDART00000152332;ENSDART00000134333;ENSDART00000152533;ENSDART00000181188;ENSDART00000152342;ENSDART00000137766;ENSDART00000191070	GO:0003743(translation initiation factor activity);GO:0005515(protein binding);GO:0006413(translational initiation);GO:0016020(membrane);GO:0016021(integral component of membrane);GO:0016021(integral component of membrane)	03013(RNA transport);03013(RNA transport)	K03262		eukaryotic translation initiation factor 5 [Source:ZFIN;Acc:ZDB-GENE-030131-975]		38.3673	61.1144	34.638	79.887	29.4974	29.0058	18.9483	31.6169	17.5232	40.4826	26.6623	21.4438
ENSDARG00000003684	obsl1a	ENSDART00000137136	GO:0005515(protein binding);GO:0005865(striated muscle thin filament);GO:0006936(muscle contraction);GO:0008307(structural constituent of muscle);GO:0030017(sarcomere);GO:0030018(Z disc);GO:0030240(skeletal muscle thin filament assembly);GO:0030241(skeletal muscle myosin thick filament assembly);GO:0031430(M band);GO:0045214(sarcomere organization);GO:0048739(cardiac muscle fiber development);GO:…				obscurin-like 1a [Source:ZFIN;Acc:ZDB-GENE-060503-649]		1.59897	0.846091	1.4001	0.197176	2.02354	5.60958	1.67315	0.397146	2.38486	0.133559	2.08857	5.22661
ENSDARG00000003693	hars	ENSDART00000142158;ENSDART00000141471	GO:0002040(sprouting angiogenesis);GO:0004812(aminoacyl-tRNA ligase activity);GO:0004821(histidine-tRNA ligase activity);GO:0005524(ATP binding);GO:0005737(cytoplasm);GO:0005739(mitochondrion);GO:0005829(cytosol);GO:0006418(tRNA aminoacylation for protein translation);GO:0006427(histidyl-tRNA aminoacylation);GO:0032543(mitochondrial translation);GO:0042802(identical protein binding);GO:1901342(re…	00970(Aminoacyl-tRNA biosynthesis);00970(Aminoacyl-tRNA biosynthesis)	K01892	EC:6.1.1.21	histidyl-tRNA synthetase [Source:ZFIN;Acc:ZDB-GENE-040912-152]		27.7707	39.7926	32.7655	27.411	46.9222	35.4021	25.8347	20.6896	37.032	24.2598	29.1002	27.9638
ENSDARG00000003695	vdac3	ENSDART00000134044;ENSDART00000137262;ENSDART00000144017	GO:0005739(mitochondrion);GO:0005741(mitochondrial outer membrane);GO:0008308(voltage-gated anion channel activity);GO:0015698(inorganic anion transport);GO:0031101(fin regeneration);GO:0055085(transmembrane transport);GO:0098656(anion transmembrane transport);GO:1902017(regulation of cilium assembly);GO:1902017(regulation of cilium assembly)	04020(Calcium signaling pathway);04216(Ferroptosis);04217(Necroptosis);04218(Cellular senescence);04621(NOD-like receptor signaling pathway);04621(NOD-like receptor signaling pathway)	K15041		voltage-dependent anion channel 3 [Source:ZFIN;Acc:ZDB-GENE-040426-2380]		60.0549	99.5742	295.514	45.9456	224.647	153.618	163.115	78.9161	254.701	42.4617	159.481	142.306		151.714	141.403	165.577	114.749
ENSDARG00000003697	slc5a8l	ENSDART00000032982;ENSDART00000135185	GO:0016020(membrane);GO:0016021(integral component of membrane);GO:0022857(transmembrane transporter activity);GO:0055085(transmembrane transport);GO:0055085(transmembrane transport)		K14388		solute carrier family 5 (iodide transporter), member 8-like [Source:ZFIN;Acc:ZDB-GENE-061110-98]		2.82093	2.04206	4.92398	0.230199	0.0238412	1.20313	5.45381	7.0612	0.785698	0.439938	1.31902	0
ENSDARG00000003699	atp7a	ENSDART00000124072	GO:0000166(nucleotide binding);GO:0004008(copper-exporting ATPase activity);GO:0005507(copper ion binding);GO:0005524(ATP binding);GO:0005802(trans-Golgi network);GO:0006812(cation transport);GO:0006878(cellular copper ion homeostasis);GO:0010038(response to metal ion);GO:0016020(membrane);GO:0016021(integral component of membrane);GO:0019829(cation-transporting ATPase activity);GO:0030001(metal …				ATPase copper transporting alpha [Source:ZFIN;Acc:ZDB-GENE-060825-45]		1.85136	3.25091	4.05272	2.51973	2.32226	1.86618	1.34589	3.04633	1.07244	0.68488	1.26921	1.01993
ENSDARG00000003701	cldng	ENSDART00000015547;ENSDART00000192758;ENSDART00000142111	GO:0005198(structural molecule activity);GO:0005886(plasma membrane);GO:0005923(bicellular tight junction);GO:0016020(membrane);GO:0016021(integral component of membrane);GO:0016338(calcium-independent cell-cell adhesion via plasma membrane cell-adhesion molecules);GO:0030054(cell junction);GO:0042802(identical protein binding);GO:0042802(identical protein binding)	04514(Cell adhesion molecules (CAMs));04530(Tight junction);04530(Tight junction)	K06087		claudin g [Source:ZFIN;Acc:ZDB-GENE-010328-7]		278.347	467.199	55.1395	773.857	0.795691	3.53815	2.67936	9.19857	3.55463	442.736	15.4689	2.1027
ENSDARG00000003705	prnprs3	ENSDART00000154348	GO:0005544(calcium-dependent phospholipid binding);GO:0005886(plasma membrane);GO:0006909(phagocytosis);GO:0007156(homophilic cell adhesion via plasma membrane adhesion molecules);GO:0010595(positive regulation of endothelial cell migration);GO:0016020(membrane);GO:0019834(phospholipase A2 inhibitor activity);GO:0021731(trigeminal motor nucleus development);GO:0042981(regulation of apoptotic proc…				prion protein, related sequence 3 [Source:ZFIN;Acc:ZDB-GENE-041221-3]		6.4775	12.6301	37.9809	0.52872	22.8036	19.5444	14.0455	8.39824	17.3448	1.92474	14.7112	13.9112
ENSDARG00000003706	ryr2b	ENSDART00000165606;ENSDART00000149737	GO:0005216(ion channel activity);GO:0005219(ryanodine-sensitive calcium-release channel activity);GO:0005262(calcium channel activity);GO:0005509(calcium ion binding);GO:0005515(protein binding);GO:0005790(smooth endoplasmic reticulum);GO:0005886(plasma membrane);GO:0006811(ion transport);GO:0006816(calcium ion transport);GO:0006874(cellular calcium ion homeostasis);GO:0016020(membrane);GO:001602…	04020(Calcium signaling pathway);04260(Cardiac muscle contraction);04261(Adrenergic signaling in cardiomyocytes);04371(Apelin signaling pathway);04371(Apelin signaling pathway)	K04962		ryanodine receptor 2b (cardiac) [Source:ZFIN;Acc:ZDB-GENE-061226-3]		0.417442	0.398533	0.0319704	1.14489	0	0.0119828	0.024224	0.120572	0	0.980123	0.0220226	0.00775033
ENSDARG00000003732	mitfa	ENSDART00000122793;ENSDART00000143374;ENSDART00000056457	GO:0000981(DNA-binding transcription factor activity, RNA polymerase II-specific);GO:0003700(DNA-binding transcription factor activity);GO:0005634(nucleus);GO:0005654(nucleoplasm);GO:0006351(transcription, DNA-templated);GO:0006355(regulation of transcription, DNA-templated);GO:0006357(regulation of transcription by RNA polymerase II);GO:0007623(circadian rhythm);GO:0030318(melanocyte differentia…	04137(Mitophagy - animal);04916(Melanogenesis);04916(Melanogenesis)	K09455		melanocyte inducing transcription factor a [Source:ZFIN;Acc:ZDB-GENE-990910-11]		0.189005	0	0.597024	0.109065	0.857249	0.640212	0.284191	0.220678	0.671381	0.190063	0.133344	0.395802
ENSDARG00000003749	polb	ENSDART00000133938;ENSDART00000002764;ENSDART00000140900	GO:0003677(DNA binding);GO:0003887(DNA-directed DNA polymerase activity);GO:0005634(nucleus);GO:0006281(DNA repair);GO:0016020(membrane);GO:0016021(integral component of membrane);GO:0016779(nucleotidyltransferase activity);GO:0034061(DNA polymerase activity);GO:0046872(metal ion binding);GO:0071897(DNA biosynthetic process);GO:0071897(DNA biosynthetic process)	03410(Base excision repair);03410(Base excision repair)	K02330	4.2.99.-;EC:2.7.7.7	polymerase (DNA directed), beta [Source:ZFIN;Acc:ZDB-GENE-040830-1]		9.4813	24.0349	3.92249	41.2448	2.99444	6.05803	5.71413	18.541	2.34242	18.6145	4.69589	5.54118
ENSDARG00000003750	pfas	ENSDART00000012581;ENSDART00000153071	GO:0004642(phosphoribosylformylglycinamidine synthase activity);GO:0005737(cytoplasm);GO:0006189('de novo' IMP biosynthetic process);GO:0006541(glutamine metabolic process);GO:0006541(glutamine metabolic process)	00230(Purine metabolism);00230(Purine metabolism)	K01952	EC:6.3.5.3	phosphoribosylformylglycinamidine synthase [Source:ZFIN;Acc:ZDB-GENE-030131-4420]		8.08664	11.7137	2.63058	17.8701	1.60207	3.07471	2.03431	3.76919	1.95875	9.1572	1.96279	1.50553
ENSDARG00000003751	lats1	ENSDART00000027119;ENSDART00000189866;ENSDART00000109321	GO:0000082(G1/S transition of mitotic cell cycle);GO:0000166(nucleotide binding);GO:0000278(mitotic cell cycle);GO:0004672(protein kinase activity);GO:0004674(protein serine/threonine kinase activity);GO:0005524(ATP binding);GO:0006468(protein phosphorylation);GO:0016301(kinase activity);GO:0016310(phosphorylation);GO:0016740(transferase activity);GO:0018105(peptidyl-serine phosphorylation);GO:00…		K08791	EC:2.7.11.1	large tumor suppressor kinase 1 [Source:ZFIN;Acc:ZDB-GENE-050523-2]		1.1248	1.82149	2.00234	1.45046	2.11913	2.99672	1.65518	2.75965	1.65801	1.03759	2.8914	1.65712
ENSDARG00000003754	tspan2a	ENSDART00000041942;ENSDART00000143241	GO:0003674(molecular_function);GO:0005887(integral component of plasma membrane);GO:0007166(cell surface receptor signaling pathway);GO:0016020(membrane);GO:0016021(integral component of membrane);GO:0016021(integral component of membrane)		K17354		tetraspanin 2a [Source:ZFIN;Acc:ZDB-GENE-050522-511]		2.11406	1.37626	1.31744	1.90642	0.787033	2.77759	5.99219	5.77496	1.5542	0.949239	1.30791	2.01692
ENSDARG00000003757	cnpy1	ENSDART00000163350;ENSDART00000020792;ENSDART00000146968	GO:0005783(endoplasmic reticulum);GO:0007275(multicellular organism development);GO:0007368(determination of left/right symmetry);GO:0008543(fibroblast growth factor receptor signaling pathway);GO:0030917(midbrain-hindbrain boundary development);GO:0040036(regulation of fibroblast growth factor receptor signaling pathway);GO:0070121(Kupffer's vesicle development);GO:0070121(Kupffer's vesicle deve…		K22936		canopy FGF signaling regulator 1 [Source:ZFIN;Acc:ZDB-GENE-060315-3]		10.6961	14.9382	7.37576	15.9242	5.62244	5.94196	4.68803	12.4976	2.30414	18.1907	13.5995	6.90851
ENSDARG00000003769	tada2b	ENSDART00000004365	GO:0003677(DNA binding);GO:0003713(transcription coactivator activity);GO:0005634(nucleus);GO:0006357(regulation of transcription by RNA polymerase II);GO:0008270(zinc ion binding);GO:0035065(regulation of histone acetylation);GO:0046872(metal ion binding);GO:1903508(positive regulation of nucleic acid-templated transcription)		K15127		transcriptional adaptor 2B [Source:ZFIN;Acc:ZDB-GENE-050522-557]		3.10583	5.14293	1.4616	6.33202	1.05034	1.76698	2.9781	4.58479	1.44989	2.55929	1.56664	0.89189
ENSDARG00000003776	pip4k2aa	ENSDART00000191137;ENSDART00000014787	GO:0000166(nucleotide binding);GO:0005524(ATP binding);GO:0005575(cellular_component);GO:0016301(kinase activity);GO:0016307(phosphatidylinositol phosphate kinase activity);GO:0016308(1-phosphatidylinositol-4-phosphate 5-kinase activity);GO:0016310(phosphorylation);GO:0016740(transferase activity);GO:0046488(phosphatidylinositol metabolic process);GO:0046854(phosphatidylinositol phosphorylation);…	00562(Inositol phosphate metabolism);04070(Phosphatidylinositol signaling system);04810(Regulation of actin cytoskeleton);04810(Regulation of actin cytoskeleton)	K00920	EC:2.7.1.149	phosphatidylinositol-5-phosphate 4-kinase, type II, alpha a [Source:ZFIN;Acc:ZDB-GENE-080721-18]		4.4697	5.78873	4.04084	4.33781	4.01984	5.83875	5.06329	10.5315	4.2467	2.8262	3.36659	3.60428
ENSDARG00000003779	ctnnd2b	ENSDART00000090292;ENSDART00000087270;ENSDART00000142500;ENSDART00000145405	GO:0001764(neuron migration);GO:0005515(protein binding);GO:0005634(nucleus);GO:0005737(cytoplasm);GO:0005886(plasma membrane);GO:0005911(cell-cell junction);GO:0005913(cell-cell adherens junction);GO:0007043(cell-cell junction assembly);GO:0045296(cadherin binding);GO:0098609(cell-cell adhesion);GO:0098609(cell-cell adhesion)				catenin (cadherin-associated protein), delta 2b [Source:ZFIN;Acc:ZDB-GENE-070912-532]		0.122861	0.0510219	0.34177	0.0315351	0.179466	0.27408	0.345024	0.668342	0.055059	0.0265921	0.11076	0.155954
ENSDARG00000003789	dennd5b	ENSDART00000033053;ENSDART00000140510;ENSDART00000079461;ENSDART00000133837;ENSDART00000141119	GO:0005085(guanyl-nucleotide exchange factor activity);GO:0005515(protein binding);GO:0016020(membrane);GO:0016021(integral component of membrane);GO:0017112(Rab guanyl-nucleotide exchange factor activity);GO:0017112(Rab guanyl-nucleotide exchange factor activity)		K20164		DENN/MADD domain containing 5B [Source:ZFIN;Acc:ZDB-GENE-030131-2248]		12.2734	20.4507	5.10788	13.1296	4.35379	2.85748	3.32382	16.9519	1.42156	10.9112	1.7428	1.03485
ENSDARG00000003795	idh2	ENSDART00000004692	GO:0000287(magnesium ion binding);GO:0004450(isocitrate dehydrogenase (NADP+) activity);GO:0006102(isocitrate metabolic process);GO:0016616(oxidoreductase activity, acting on the CH-OH group of donors, NAD or NADP as acceptor);GO:0051287(NAD binding);GO:0055114(oxidation-reduction process)	00020(Citrate cycle (TCA cycle));00480(Glutathione metabolism);04146(Peroxisome)	K00031	EC:1.1.1.42	isocitrate dehydrogenase 2 (NADP+), mitochondrial [Source:ZFIN;Acc:ZDB-GENE-031118-95]		222.644	158.818	1458.03	142.297	1545.06	1188.77	1670.37	226.26	2730.13	143.035	1540.42	1625.55
ENSDARG00000003797	asb2a	ENSDART00000026088;ENSDART00000148361;ENSDART00000153184;ENSDART00000153448	GO:0005515(protein binding);GO:0016567(protein ubiquitination);GO:0035556(intracellular signal transduction);GO:0035556(intracellular signal transduction)		K10324		ankyrin repeat and SOCS box containing 2a, tandem duplicate 1 [Source:ZFIN;Acc:ZDB-GENE-030131-5355]		0.79341	0.251352	3.26623	0.318932	3.97768	10.1692	7.53684	0.925636	11.5013	0.62704	10.3899	7.5251
ENSDARG00000003803	LHX3	ENSDART00000097164	GO:0003677(DNA binding);GO:0005634(nucleus);GO:0046872(metal ion binding)				LIM homeobox 3 [Source:HGNC Symbol;Acc:HGNC:6595]		0	0	0.776281	0	0	0	0	0	0	0	0	0
ENSDARG00000003808	aqp3a	ENSDART00000009182	GO:0005372(water transmembrane transporter activity);GO:0006833(water transport);GO:0015105(arsenite transmembrane transporter activity);GO:0015168(glycerol transmembrane transporter activity);GO:0015204(urea transmembrane transporter activity);GO:0015267(channel activity);GO:0015700(arsenite transport);GO:0015793(glycerol transport);GO:0016020(membrane);GO:0016021(integral component of membrane)…				aquaporin 3a [Source:ZFIN;Acc:ZDB-GENE-040426-2826]		31.6168	22.7795	109.036	8.94215	153.039	166.284	100.087	49.5564	112.239	12.7954	247.019	169.185
ENSDARG00000003811	plxnb2a	ENSDART00000143773;ENSDART00000048821;ENSDART00000159447	GO:0002040(sprouting angiogenesis);GO:0002116(semaphorin receptor complex);GO:0005515(protein binding);GO:0005887(integral component of plasma membrane);GO:0007162(negative regulation of cell adhesion);GO:0007165(signal transduction);GO:0008360(regulation of cell shape);GO:0016020(membrane);GO:0016021(integral component of membrane);GO:0017154(semaphorin receptor activity);GO:0030334(regulation o…				plexin b2a [Source:ZFIN;Acc:ZDB-GENE-030131-8917]		12.5766	13.852	5.96131	13.534	7.22001	8.38418	8.33872	18.4316	5.33484	9.73298	7.73732	6.20299
ENSDARG00000003818	prkag1	ENSDART00000022179	GO:0005575(cellular_component);GO:0016301(kinase activity);GO:0016310(phosphorylation);GO:0032559(adenyl ribonucleotide binding);GO:0071900(regulation of protein serine/threonine kinase activity)	04068(FoxO signaling pathway);04371(Apelin signaling pathway);04530(Tight junction);04910(Insulin signaling pathway);04920(Adipocytokine signaling pathway)	K07200		protein kinase, AMP-activated, gamma 1 non-catalytic subunit [Source:ZFIN;Acc:ZDB-GENE-040426-2188]		4.23875	5.30261	8.61452	1.69932	7.1068	7.61912	5.47713	8.55539	3.5878	1.60428	7.40039	4.98857
ENSDARG00000003820	nr1d2a	ENSDART00000153675;ENSDART00000148588;ENSDART00000128167	GO:0003677(DNA binding);GO:0003700(DNA-binding transcription factor activity);GO:0003707(steroid hormone receptor activity);GO:0004879(nuclear receptor activity);GO:0005634(nucleus);GO:0006355(regulation of transcription, DNA-templated);GO:0008270(zinc ion binding);GO:0030522(intracellular receptor signaling pathway);GO:0032922(circadian regulation of gene expression);GO:0043401(steroid hormone m…				nuclear receptor subfamily 1, group D, member 2a [Source:ZFIN;Acc:ZDB-GENE-040504-1]		5.70529	12.4883	30.8407	1.20917	68.1011	5.82553	6.63395	9.17204	3.50997	5.14419	7.76849	9.94231
ENSDARG00000003822	ankrd16	ENSDART00000037600;ENSDART00000147424;ENSDART00000131541	GO:0003674(molecular_function);GO:0005515(protein binding);GO:0005575(cellular_component);GO:0008150(biological_process);GO:0008150(biological_process)				ankyrin repeat domain 16 [Source:ZFIN;Acc:ZDB-GENE-041210-253]		1.72322	1.30703	0.703386	2.22045	1.04803	1.5061	1.04531	1.47643	1.03648	1.93519	1.19291	0.366221
ENSDARG00000003827	snapc1b	ENSDART00000003888;ENSDART00000134318	GO:0019185(snRNA-activating protein complex);GO:0042795(snRNA transcription by RNA polymerase II);GO:0042796(snRNA transcription by RNA polymerase III);GO:0043565(sequence-specific DNA binding);GO:0043565(sequence-specific DNA binding)		K15208		small nuclear RNA activating complex, polypeptide 1b [Source:ZFIN;Acc:ZDB-GENE-040426-716]		2.1707	3.59107	1.69613	3.66179	2.45577	3.57223	1.57421	2.08851	1.47422	2.64276	2.31724	1.35122
ENSDARG00000003829	galnt2	ENSDART00000136217	GO:0000139(Golgi membrane);GO:0005794(Golgi apparatus);GO:0006486(protein glycosylation);GO:0016020(membrane);GO:0016021(integral component of membrane);GO:0016740(transferase activity);GO:0016757(transferase activity, transferring glycosyl groups);GO:0030246(carbohydrate binding);GO:0030500(regulation of bone mineralization);GO:0031101(fin regeneration)	00512(Mucin type O-glycan biosynthesis)	K00710	EC:2.4.1.41	UDP-N-acetyl-alpha-D-galactosamine:polypeptide N-acetylgalactosaminyltransferase 2 [Source:ZFIN;Acc:ZDB-GENE-041111-110]		15.3043	19.6832	6.26007	34.5286	5.78181	6.45675	3.93803	5.40321	3.7675	15.9437	8.25176	4.86324
ENSDARG00000003835	stom	ENSDART00000163238;ENSDART00000191700;ENSDART00000005750;ENSDART00000141326	GO:0003674(molecular_function);GO:0005887(integral component of plasma membrane);GO:0016020(membrane);GO:0016021(integral component of membrane);GO:0016021(integral component of membrane)		K17286		stomatin [Source:ZFIN;Acc:ZDB-GENE-980526-486]		5.41544	1.49762	3.07992	0.963859	5.89926	9.13315	7.40062	10.0328	6.25445	1.98189	5.61171	6.50522
ENSDARG00000003841	usb1	ENSDART00000007029	GO:0000175(3'-5'-exoribonuclease activity);GO:0004518(nuclease activity);GO:0005634(nucleus);GO:0016787(hydrolase activity);GO:0030097(hemopoiesis);GO:0030223(neutrophil differentiation);GO:0034477(U6 snRNA 3'-end processing);GO:0043484(regulation of RNA splicing);GO:0090305(nucleic acid phosphodiester bond hydrolysis);GO:0090503(RNA phosphodiester bond hydrolysis, exonucleolytic);GO:1990838(poly…		K23093	EC:3.1.4.-	U6 snRNA biogenesis 1 [Source:ZFIN;Acc:ZDB-GENE-040801-197]		1.92593	3.04056	2.07347	2.83508	1.44441	2.31909	1.32562	2.19339	1.78066	2.08629	2.05765	1.37585
ENSDARG00000003845	chm	ENSDART00000005479	GO:0001895(retina homeostasis);GO:0004663(Rab geranylgeranyltransferase activity);GO:0005092(GDP-dissociation inhibitor activity);GO:0005096(GTPase activator activity);GO:0005737(cytoplasm);GO:0005968(Rab-protein geranylgeranyltransferase complex);GO:0006886(intracellular protein transport);GO:0007264(small GTPase mediated signal transduction);GO:0010842(retina layer formation);GO:0017137(Rab GTP…				choroideremia (Rab escort protein 1) [Source:ZFIN;Acc:ZDB-GENE-030318-2]		7.20803	10.612	6.125	15.2108	5.70794	5.08904	3.87317	6.46593	2.96434	5.23017	5.72664	3.27834
ENSDARG00000003846	mrpl21	ENSDART00000162933	GO:0003735(structural constituent of ribosome);GO:0005762(mitochondrial large ribosomal subunit);GO:0005840(ribosome)	03010(Ribosome)	K02888		mitochondrial ribosomal protein L21 [Source:ZFIN;Acc:ZDB-GENE-061027-183]		19.811	39.4488	14.5234	50.0019	10.615	10.3535	9.89714	13.7407	10.0527	23.2655	13.1874	6.61502
ENSDARG00000003854	acsl1b	ENSDART00000130801;ENSDART00000010773	GO:0003824(catalytic activity);GO:0005575(cellular_component);GO:0005575(cellular_component)	00061(Fatty acid biosynthesis);00071(Fatty acid degradation);03320(PPAR signaling pathway);04146(Peroxisome);04216(Ferroptosis);04920(Adipocytokine signaling pathway);04920(Adipocytokine signaling pathway)	K01897	EC:6.2.1.3	acyl-CoA synthetase long chain family member 1b [Source:ZFIN;Acc:ZDB-GENE-040801-88]		3.65402	3.3717	13.0031	1.8452	21.3689	17.9779	13.7117	8.27643	15.6152	4.58869	11.0794	13.4108		6.67626	13.7307	12.5344	9.69297
ENSDARG00000003860	cbx3a	ENSDART00000012352;ENSDART00000186609	GO:0005634(nucleus);GO:0005719(nuclear euchromatin);GO:0045892(negative regulation of transcription, DNA-templated);GO:0045892(negative regulation of transcription, DNA-templated)		K11586		chromobox homolog 3a (HP1 gamma homolog, Drosophila) [Source:ZFIN;Acc:ZDB-GENE-030131-1158]		11.5543	21.6828	13.0652	28.5688	10.4329	12.5745	11.0573	14.5392	6.63034	12.1771	14.6544	8.59609
ENSDARG00000003865	pard6b	ENSDART00000016901	GO:0005080(protein kinase C binding);GO:0005515(protein binding);GO:0005634(nucleus);GO:0005938(cell cortex);GO:0007043(cell-cell junction assembly);GO:0007098(centrosome cycle);GO:0007163(establishment or maintenance of cell polarity);GO:0016324(apical plasma membrane);GO:0017048(Rho GTPase binding);GO:0060341(regulation of cellular localization)	04144(Endocytosis);04530(Tight junction)	K06093		par-6 partitioning defective 6 homolog beta (C. elegans) [Source:ZFIN;Acc:ZDB-GENE-090312-133]		0.772802	2.80682	1.07394	0.10024	1.05215	1.13097	1.51602	2.43795	0.583862	0.460358	1.41552	1.16421
ENSDARG00000003866	tm9sf2	ENSDART00000019743;ENSDART00000135873	GO:0016020(membrane);GO:0016021(integral component of membrane);GO:0072657(protein localization to membrane);GO:0072657(protein localization to membrane)		K17086		transmembrane 9 superfamily member 2 [Source:ZFIN;Acc:ZDB-GENE-030131-6302]		41.3482	64.3375	45.325	65.6192	37.3938	37.905	27.2654	35.8831	20.8033	38.5635	47.9917	38.4695
ENSDARG00000003867	cdk20	ENSDART00000140098;ENSDART00000176938;ENSDART00000148339	GO:0000166(nucleotide binding);GO:0004672(protein kinase activity);GO:0004674(protein serine/threonine kinase activity);GO:0004693(cyclin-dependent protein serine/threonine kinase activity);GO:0005524(ATP binding);GO:0005634(nucleus);GO:0005675(transcription factor TFIIH holo complex);GO:0005737(cytoplasm);GO:0005929(cilium);GO:0006468(protein phosphorylation);GO:0007049(cell cycle);GO:0007275(mu…		K08817	EC:2.7.11.22	cyclin-dependent kinase 20 [Source:ZFIN;Acc:ZDB-GENE-041212-84]		0.148374	0.2299	0.286291	0.404043	0.189812	0.556464	2.35419	6.88856	0.18276	0.222684	0.131479	0.12475
ENSDARG00000003869	decr1	ENSDART00000139069;ENSDART00000134441;ENSDART00000147812			K13236	EC:1.3.1.34	2,4-dienoyl CoA reductase 1, mitochondrial [Source:ZFIN;Acc:ZDB-GENE-040718-142]		9.67167	9.68212	4.42854	14.4388	6.59104	8.08216	10.3329	47.0422	15.071	13.1196	9.49379	12.8551
ENSDARG00000003872	ccdc102a	ENSDART00000173947;ENSDART00000011324	GO:0003774(motor activity);GO:0016459(myosin complex);GO:0016459(myosin complex)		K16759		coiled-coil domain containing 102A [Source:ZFIN;Acc:ZDB-GENE-030131-4044]		4.06844	8.38875	0.995518	14.0898	0.937045	1.2991	1.82694	2.36963	1.169	6.41249	0.346839	1.22559
ENSDARG00000003877	pbrm1	ENSDART00000045971;ENSDART00000159683;ENSDART00000182041	GO:0003677(DNA binding);GO:0003682(chromatin binding);GO:0005515(protein binding);GO:0005634(nucleus);GO:0006337(nucleosome disassembly);GO:0006338(chromatin remodeling);GO:0006368(transcription elongation from RNA polymerase II promoter);GO:0015616(DNA translocase activity);GO:0016586(RSC-type complex);GO:0043044(ATP-dependent chromatin remodeling);GO:0043044(ATP-dependent chromatin remodeling)		K11757		polybromo 1 [Source:ZFIN;Acc:ZDB-GENE-080926-4]		1.34881	2.33136	0.460961	4.53869	0.565235	1.22261	1.89047	5.13933	0.302559	1.2567	0.37563	0.526993
ENSDARG00000003899	zdhhc23b	ENSDART00000010126	GO:0005783(endoplasmic reticulum);GO:0005794(Golgi apparatus);GO:0006612(protein targeting to membrane);GO:0016020(membrane);GO:0016021(integral component of membrane);GO:0016740(transferase activity);GO:0016746(transferase activity, transferring acyl groups);GO:0018230(peptidyl-L-cysteine S-palmitoylation);GO:0019706(protein-cysteine S-palmitoyltransferase activity)		K18932	EC:2.3.1.225	zinc finger, DHHC-type containing 23b [Source:ZFIN;Acc:ZDB-GENE-040808-13]		2.86454	4.19306	1.67517	3.76234	1.32897	1.92677	0.779908	1.74266	0.265529	2.29189	1.97215	1.20749
ENSDARG00000003900	gpr61l	ENSDART00000155174	GO:0004930(G protein-coupled receptor activity);GO:0007165(signal transduction);GO:0007186(G protein-coupled receptor signaling pathway);GO:0016021(integral component of membrane)		K08414		G protein-coupled receptor 61-like [Source:ZFIN;Acc:ZDB-GENE-131127-443]		0.349468	0.135019	0.212311	0.112613	0.16648	0.49373	0.256595	0.635924	0.138605	0.145175	0.139565	0.114284
ENSDARG00000003902	ctsl	ENSDART00000017756;ENSDART00000180178;ENSDART00000181461;ENSDART00000156158	GO:0004197(cysteine-type endopeptidase activity);GO:0005615(extracellular space);GO:0005764(lysosome);GO:0006508(proteolysis);GO:0008233(peptidase activity);GO:0008234(cysteine-type peptidase activity);GO:0016787(hydrolase activity);GO:0051603(proteolysis involved in cellular protein catabolic process);GO:0051603(proteolysis involved in cellular protein catabolic process)	04140(Autophagy - animal);04142(Lysosome);04145(Phagosome);04210(Apoptosis);04210(Apoptosis)	K01365	EC:3.4.22.15	cathepsin L.1 [Source:ZFIN;Acc:ZDB-GENE-040718-61]		5.76848	8.42171	1.92118	20.3928	0.566262	1.05139	83.1215	110.311	0.809557	1.49072	1.30029	0.588785
ENSDARG00000003903	hapln2	ENSDART00000087149	GO:0001501(skeletal system development);GO:0005515(protein binding);GO:0005540(hyaluronic acid binding);GO:0007155(cell adhesion);GO:0007417(central nervous system development);GO:0031012(extracellular matrix);GO:0042802(identical protein binding)		K06851		hyaluronan and proteoglycan link protein 2 [Source:ZFIN;Acc:ZDB-GENE-030131-8089]		0.687537	0.110955	1.13465	0.511037	1.5392	3.56752	3.83515	0.832347	1.8278	0.148886	2.10921	1.86239
ENSDARG00000003904	sycp1	ENSDART00000011876;ENSDART00000124524	GO:0000795(synaptonemal complex);GO:0007130(synaptonemal complex assembly);GO:0007130(synaptonemal complex assembly)		K19533		synaptonemal complex protein 1 [Source:ZFIN;Acc:ZDB-GENE-040910-6]		1.21583	2.91856	1.85877	2.02972	2.68355	2.77608	24.5711	69.7448	1.33045	0.604531	3.59177	1.41635
ENSDARG00000003909	ftr01	ENSDART00000100524	GO:0005515(protein binding);GO:0008270(zinc ion binding);GO:0046872(metal ion binding)				finTRIM family, member 1 [Source:ZFIN;Acc:ZDB-GENE-070705-491]		0.74998	0.025369	0.083102	0	0	0.102764	2.09678	2.10752	0	0.280204	0	0
ENSDARG00000003910	med13b	ENSDART00000152355;ENSDART00000152358	GO:0003712(transcription coregulator activity);GO:0005634(nucleus);GO:0006357(regulation of transcription by RNA polymerase II);GO:0016592(mediator complex);GO:0016592(mediator complex)		K15164		mediator complex subunit 13b [Source:ZFIN;Acc:ZDB-GENE-030131-3529]		8.28101	10.8008	4.77736	17.2116	5.10967	5.06002	4.28358	6.26947	3.69978	7.55287	5.1624	3.32586
ENSDARG00000003920	setb	ENSDART00000190943;ENSDART00000023834	GO:0005634(nucleus);GO:0006334(nucleosome assembly);GO:0048884(neuromast development);GO:0048884(neuromast development)		K11290		SET nuclear proto-oncogene b [Source:ZFIN;Acc:ZDB-GENE-030131-433]		28.07	47.5756	22.3718	73.6677	15.1311	22.4996	14.0127	23.0097	12.3964	31.3504	22.4853	19.0652
ENSDARG00000003925	cx28	ENSDART00000012889	GO:0003674(molecular_function);GO:0005886(plasma membrane);GO:0005921(gap junction);GO:0005922(connexin complex);GO:0007154(cell communication);GO:0016020(membrane);GO:0016021(integral component of membrane);GO:0030054(cell junction)				connexin 28.6 [Source:ZFIN;Acc:ZDB-GENE-040406-4]		0.8766	0.29273	0.126415	0.218159	5.15304	7.12132	0.951072	1.42246	5.53788	0.726816	8.34712	2.89637
ENSDARG00000003927	cldn12	ENSDART00000025877	GO:0016020(membrane);GO:0016021(integral component of membrane)				claudin 12 [Source:ZFIN;Acc:ZDB-GENE-010328-14]		5.06582	12.4734	7.34958	6.89013	4.87933	8.44236	5.50493	6.64919	4.76721	3.67695	4.60642	5.14913
ENSDARG00000003931	cndp2	ENSDART00000143457;ENSDART00000038202	GO:0005575(cellular_component);GO:0006508(proteolysis);GO:0008237(metallopeptidase activity);GO:0016787(hydrolase activity);GO:0016805(dipeptidase activity);GO:0046872(metal ion binding);GO:0046872(metal ion binding)	00330(Arginine and proline metabolism);00340(Histidine metabolism);00410(beta-Alanine metabolism);00410(beta-Alanine metabolism)	K08660	EC:3.4.13.18	carnosine dipeptidase 2 [Source:ZFIN;Acc:ZDB-GENE-030131-5499]		36.7353	17.5597	17.6614	16.8611	36.169	40.33	34.9914	41.7508	12.3116	12.9236	24.8065	21.5034
ENSDARG00000003934	nxnl2	ENSDART00000016103	GO:0005623(cell);GO:0007600(sensory perception);GO:0045454(cell redox homeostasis);GO:0045494(photoreceptor cell maintenance)		K17609	EC:1.8.1.8	nucleoredoxin like 2 [Source:ZFIN;Acc:ZDB-GENE-041212-55]		4.16729	7.24201	2.55006	9.40541	0.613023	2.42555	2.70014	4.16426	1.55672	5.68971	1.52545	2.08663
ENSDARG00000003938	rpa1	ENSDART00000032880	GO:0000723(telomere maintenance);GO:0000724(double-strand break repair via homologous recombination);GO:0000784(nuclear chromosome, telomeric region);GO:0003676(nucleic acid binding);GO:0003677(DNA binding);GO:0003684(damaged DNA binding);GO:0003697(single-stranded DNA binding);GO:0005634(nucleus);GO:0005662(DNA replication factor A complex);GO:0006260(DNA replication);GO:0006261(DNA-dependent DN…	03030(DNA replication);03420(Nucleotide excision repair);03430(Mismatch repair);03440(Homologous recombination);03460(Fanconi anemia pathway)	K07466		replication protein A1 [Source:ZFIN;Acc:ZDB-GENE-030912-3]		32.8258	60.2223	24.4307	90.9288	14.905	19.0452	14.3201	29.9006	8.586	41.6533	16.3782	11.4583
ENSDARG00000003940	mtfr1l	ENSDART00000007271;ENSDART00000144556;ENSDART00000138356	GO:0000266(mitochondrial fission);GO:0003674(molecular_function);GO:0005739(mitochondrion);GO:0009060(aerobic respiration);GO:0009060(aerobic respiration)				mitochondrial fission regulator 1-like [Source:ZFIN;Acc:ZDB-GENE-030131-6228]		6.65097	7.2787	4.27782	15.6337	6.42004	6.54213	4.84824	6.95138	3.7516	6.57267	5.09217	3.67851
ENSDARG00000003941	rrs1	ENSDART00000125190	GO:0000055(ribosomal large subunit export from nucleus);GO:0000447(endonucleolytic cleavage in ITS1 to separate SSU-rRNA from 5.8S rRNA and LSU-rRNA from tricistronic rRNA transcript (SSU-rRNA, 5.8S rRNA, LSU-rRNA));GO:0003674(molecular_function);GO:0005634(nucleus);GO:0005730(nucleolus);GO:0030687(preribosome, large subunit precursor);GO:0042254(ribosome biogenesis);GO:0042273(ribosomal large su…		K14852		RRS1 ribosome biogenesis regulator homolog (S. cerevisiae) [Source:ZFIN;Acc:ZDB-GENE-030131-9345]		18.3739	35.7844	9.88422	44.1466	4.48604	4.03951	3.26457	5.24652	2.76359	23.9327	4.6649	4.72261
ENSDARG00000003944	nmur1b	ENSDART00000017787	GO:0001607(neuromedin U receptor activity);GO:0004930(G protein-coupled receptor activity);GO:0007165(signal transduction);GO:0007186(G protein-coupled receptor signaling pathway);GO:0007218(neuropeptide signaling pathway);GO:0016020(membrane);GO:0016021(integral component of membrane)	04080(Neuroactive ligand-receptor interaction)	K05052		neuromedin U receptor 1b [Source:ZFIN;Acc:ZDB-GENE-131121-154]		0.054743	0	0	0	0	0	0.24636	0.09871	0	0	0	0
ENSDARG00000003952	pfn2	ENSDART00000104687;ENSDART00000164443	GO:0003779(actin binding);GO:0005737(cytoplasm);GO:0030036(actin cytoskeleton organization);GO:0030833(regulation of actin filament polymerization);GO:0032233(positive regulation of actin filament bundle assembly);GO:0032233(positive regulation of actin filament bundle assembly)	04810(Regulation of actin cytoskeleton);05132(Salmonella infection);05132(Salmonella infection)	K05759		profilin 2 [Source:ZFIN;Acc:ZDB-GENE-040115-4]		170.445	167.024	90.5484	459.957	93.0971	96.9805	92.5583	131.864	50.8965	177.677	118.341	74.5549
ENSDARG00000003961	parp3	ENSDART00000022949	GO:0003950(NAD+ ADP-ribosyltransferase activity);GO:0005634(nucleus);GO:0005730(nucleolus);GO:0006302(double-strand break repair);GO:0006471(protein ADP-ribosylation);GO:0016740(transferase activity);GO:0016757(transferase activity, transferring glycosyl groups);GO:0035861(site of double-strand break);GO:0070212(protein poly-ADP-ribosylation);GO:0071696(ectodermal placode development);GO:0090299(…	03410(Base excision repair);04210(Apoptosis);04217(Necroptosis)	K10798	EC:2.4.2.30	poly (ADP-ribose) polymerase family, member 3 [Source:ZFIN;Acc:ZDB-GENE-030131-7435]		3.90981	2.66617	4.38499	1.13239	3.85653	7.64219	7.58741	16.4217	3.13601	1.90166	5.34457	3.76278
ENSDARG00000003963	traf4a	ENSDART00000016024	GO:0005164(tumor necrosis factor receptor binding);GO:0005515(protein binding);GO:0005737(cytoplasm);GO:0007165(signal transduction);GO:0007250(activation of NF-kappaB-inducing kinase activity);GO:0008270(zinc ion binding);GO:0031625(ubiquitin protein ligase binding);GO:0031996(thioesterase binding);GO:0032991(protein-containing complex);GO:0042981(regulation of apoptotic process);GO:0046330(posi…				tnf receptor-associated factor 4a [Source:ZFIN;Acc:ZDB-GENE-040308-1]		2.246	2.9276	3.10131	2.83096	5.23285	8.77431	3.19473	4.73611	3.47164	1.59137	6.18187	5.01394
ENSDARG00000003965	tlx1	ENSDART00000006393	GO:0003677(DNA binding);GO:0005634(nucleus);GO:0006355(regulation of transcription, DNA-templated);GO:0043565(sequence-specific DNA binding)		K09340		T cell leukemia homeobox 1 [Source:ZFIN;Acc:ZDB-GENE-021021-2]		0.16615	0.039108	0.064992	0.132644	0.051985	0	0.022158	1.48468	0	0.062722	0.025011	0
ENSDARG00000003968	larp6b	ENSDART00000004483;ENSDART00000134957;ENSDART00000137879	GO:0003676(nucleic acid binding);GO:0003723(RNA binding);GO:0005634(nucleus);GO:0006396(RNA processing);GO:1990904(ribonucleoprotein complex);GO:1990904(ribonucleoprotein complex)		K18733		La ribonucleoprotein domain family, member 6b [Source:ZFIN;Acc:ZDB-GENE-041008-244]		67.0262	108.401	45.6222	249.69	0.22521	1.3401	0.483336	0.854364	0.994499	101.908	3.90985	0.59313
ENSDARG00000003970	trim35-13	ENSDART00000154365	GO:0005515(protein binding);GO:0008270(zinc ion binding);GO:0046872(metal ion binding)				tripartite motif containing 35-13 [Source:ZFIN;Acc:ZDB-GENE-110920-5]		2.50153	0.1131	1.60131	0.65711	5.00279	16.4769	11.482	1.27223	16.0457	0.848875	10.0522	21.6533
ENSDARG00000003971	isl2a	ENSDART00000012862	GO:0000981(DNA-binding transcription factor activity, RNA polymerase II-specific);GO:0003677(DNA binding);GO:0005634(nucleus);GO:0006355(regulation of transcription, DNA-templated);GO:0006357(regulation of transcription by RNA polymerase II);GO:0007275(multicellular organism development);GO:0007409(axonogenesis);GO:0007411(axon guidance);GO:0031017(exocrine pancreas development);GO:0035476(angiob…		K18492		ISL LIM homeobox 2a [Source:ZFIN;Acc:ZDB-GENE-980526-562]		0.231732	0.752091	0.505409	0.102323	0.317909	0.204852	1.3947	0.579147	0.791008	0.084508	0.412153	0.906196
ENSDARG00000003973	chordc1a	ENSDART00000041249	GO:0005575(cellular_component)		K16729		cysteine and histidine-rich domain (CHORD) containing 1a [Source:ZFIN;Acc:ZDB-GENE-050626-79]		4.8969	9.22297	2.18992	18.427	1.71073	1.98979	1.52197	3.15473	1.06168	9.44347	2.00935	1.487
ENSDARG00000003974	spoplb	ENSDART00000109418;ENSDART00000015021	GO:0005515(protein binding);GO:0005634(nucleus);GO:0005737(cytoplasm);GO:0006511(ubiquitin-dependent protein catabolic process);GO:0016567(protein ubiquitination);GO:0030162(regulation of proteolysis);GO:0031397(negative regulation of protein ubiquitination);GO:0031463(Cul3-RING ubiquitin ligase complex);GO:0031625(ubiquitin protein ligase binding);GO:0043161(proteasome-mediated ubiquitin-depende…				speckle-type POZ protein-like b [Source:ZFIN;Acc:ZDB-GENE-061103-277]		10.7449	17.7501	41.8151	18.6581	8.20734	8.31259	7.39546	10.9507	5.06198	10.5118	7.39287	6.59331
ENSDARG00000003977	zgc:153896	ENSDART00000018519	GO:0003824(catalytic activity);GO:0005575(cellular_component)	00600(Sphingolipid metabolism)	K12354	EC:3.1.4.12	zgc:153896 [Source:ZFIN;Acc:ZDB-GENE-060825-119]		2.5461	1.49286	0.719917	1.30128	0.837368	1.2348	3.1758	5.72369	0.672841	1.25491	1.80059	0.552594
ENSDARG00000003984	LTN1	ENSDART00000022170	GO:0005829(cytosol);GO:0008270(zinc ion binding);GO:0016567(protein ubiquitination);GO:0043023(ribosomal large subunit binding);GO:0043161(proteasome-mediated ubiquitin-dependent protein catabolic process);GO:0046872(metal ion binding);GO:0061630(ubiquitin protein ligase activity);GO:0072344(rescue of stalled ribosome);GO:1990112(RQC complex);GO:1990116(ribosome-associated ubiquitin-dependent pro…		K22377	EC:2.3.2.27	si:dkey-175g6.5 [Source:ZFIN;Acc:ZDB-GENE-091204-127]		3.39457	8.57077	3.19163	6.21441	2.66532	2.40004	1.54521	2.75861	0.925044	3.18286	1.64294	1.765
ENSDARG00000003989	crhr1	ENSDART00000156527	GO:0004888(transmembrane signaling receptor activity);GO:0004930(G protein-coupled receptor activity);GO:0007165(signal transduction);GO:0007166(cell surface receptor signaling pathway);GO:0007186(G protein-coupled receptor signaling pathway);GO:0009755(hormone-mediated signaling pathway);GO:0015056(corticotrophin-releasing factor receptor activity);GO:0016020(membrane);GO:0016021(integral compon…	04080(Neuroactive ligand-receptor interaction)	K04578		corticotropin releasing hormone receptor 1 [Source:ZFIN;Acc:ZDB-GENE-081231-1]		0.065183	0.134617	0.180327	0.179707	0.057253	0.16679	0.089908	0.056135	0.005694	0.109664	0.046816	0.028635
ENSDARG00000003991	fhl2b	ENSDART00000187713;ENSDART00000185327;ENSDART00000138078	GO:0005634(nucleus);GO:0030018(Z disc);GO:0046872(metal ion binding);GO:0046872(metal ion binding)				four and a half LIM domains 2b [Source:ZFIN;Acc:ZDB-GENE-041010-121]		0.876723	0.223289	2.14112	0.140188	1.35874	4.90151	3.36828	0.386432	2.19796	0.352363	0.676182	3.65776
ENSDARG00000003994	syt9a	ENSDART00000018685	GO:0000149(SNARE binding);GO:0001786(phosphatidylserine binding);GO:0005509(calcium ion binding);GO:0005544(calcium-dependent phospholipid binding);GO:0005886(plasma membrane);GO:0014059(regulation of dopamine secretion);GO:0016020(membrane);GO:0016021(integral component of membrane);GO:0016192(vesicle-mediated transport);GO:0017156(calcium ion regulated exocytosis);GO:0017158(regulation of calci…				synaptotagmin IXa [Source:ZFIN;Acc:ZDB-GENE-031002-18]		0	0	0	0.042583	0	0.032933	0.116887	0.437994	0	0.036074	0.016044	0.032183
ENSDARG00000003998	phyhipla	ENSDART00000006676;ENSDART00000126075	GO:0003674(molecular_function);GO:0005515(protein binding);GO:0005575(cellular_component);GO:0008150(biological_process);GO:0008150(biological_process)				phytanoyl-CoA 2-hydroxylase interacting protein-like a [Source:ZFIN;Acc:ZDB-GENE-061215-64]		0.166644	0.0275304	0.0240382	0.135447	0	0.0467739	0.154655	0.32702	0	0.708192	0	0
ENSDARG00000004015	adcyap1a	ENSDART00000180869;ENSDART00000012070	GO:0005179(hormone activity);GO:0005184(neuropeptide hormone activity);GO:0005576(extracellular region);GO:0007189(adenylate cyclase-activating G protein-coupled receptor signaling pathway);GO:0007218(neuropeptide signaling pathway);GO:0007420(brain development);GO:0010469(regulation of signaling receptor activity);GO:0016521(pituitary adenylate cyclase activating polypeptide activity);GO:0031175…	04080(Neuroactive ligand-receptor interaction);04080(Neuroactive ligand-receptor interaction)	K05262		adenylate cyclase activating polypeptide 1a [Source:ZFIN;Acc:ZDB-GENE-020809-4]		0.510585	0.424453	0.46279	0.136688	0.387365	0.150644	2.11056	1.27859	0.265038	0.114254	0.449253	0.100349
ENSDARG00000004017	spag1a	ENSDART00000185960;ENSDART00000130537	GO:0005515(protein binding);GO:0005737(cytoplasm);GO:0070286(axonemal dynein complex assembly);GO:0070286(axonemal dynein complex assembly)		K19870		sperm associated antigen 1a [Source:ZFIN;Acc:ZDB-GENE-030131-9443]		2.50491	19.4984	6.31114	0.345649	6.50429	5.96918	3.74895	3.70244	2.70053	0.850403	7.71929	4.55261
ENSDARG00000004018	CHST13	ENSDART00000013449	GO:0000139(Golgi membrane);GO:0005794(Golgi apparatus);GO:0005975(carbohydrate metabolic process);GO:0008146(sulfotransferase activity);GO:0016021(integral component of membrane);GO:0016051(carbohydrate biosynthetic process);GO:0016740(transferase activity)	00532(Glycosaminoglycan biosynthesis - chondroitin sulfate / dermatan sulfate)	K07779	EC:2.8.2.5	si:ch211-236h17.3 [Source:ZFIN;Acc:ZDB-GENE-030131-738]		4.38175	7.23218	4.068	10.2343	1.65673	2.48538	0.935767	1.83699	1.47229	5.90081	2.39394	1.41286
ENSDARG00000004023	isl1	ENSDART00000010896	GO:0000981(DNA-binding transcription factor activity, RNA polymerase II-specific);GO:0003322(pancreatic A cell development);GO:0003323(type B pancreatic cell development);GO:0003324(pancreatic D cell development);GO:0003677(DNA binding);GO:0005634(nucleus);GO:0006355(regulation of transcription, DNA-templated);GO:0007275(multicellular organism development);GO:0007409(axonogenesis);GO:0007507(hear…		K09370		ISL LIM homeobox 1 [Source:ZFIN;Acc:ZDB-GENE-980526-112]		0.112077	0.21679	0.119579	0.20532	0.29922	0.230108	0.4995	0.353399	0.463639	0.13893	0.110107	0.313978
ENSDARG00000004034	arhgdig	ENSDART00000019004;ENSDART00000132761	GO:0005094(Rho GDP-dissociation inhibitor activity);GO:0005737(cytoplasm);GO:0005829(cytosol);GO:0007266(Rho protein signal transduction);GO:0016020(membrane);GO:0048365(Rac GTPase binding);GO:0050790(regulation of catalytic activity);GO:0050790(regulation of catalytic activity)		K12462		Rho GDP dissociation inhibitor (GDI) gamma [Source:ZFIN;Acc:ZDB-GENE-040426-1493]		30.0779	19.7244	51.4001	14.7946	67.5276	80.3228	34.663	41.2968	25.2486	8.97812	113.425	40.8416
ENSDARG00000004037	cog2	ENSDART00000026189	GO:0006891(intra-Golgi vesicle-mediated transport);GO:0007030(Golgi organization);GO:0008565(protein transporter activity);GO:0015031(protein transport);GO:0016020(membrane);GO:0017119(Golgi transport complex)		K20289		component of oligomeric golgi complex 2 [Source:ZFIN;Acc:ZDB-GENE-040426-2671]		14.541	82.5191	7.35199	26.7285	3.63508	4.91676	3.30261	7.37147	2.15903	12.1064	6.22343	4.05816
ENSDARG00000004046	phf6	ENSDART00000172945;ENSDART00000006463;ENSDART00000138341;ENSDART00000170683;ENSDART00000173281	GO:0046872(metal ion binding);GO:0046872(metal ion binding)		K23310		PHD finger protein 6 [Source:ZFIN;Acc:ZDB-GENE-030131-5278]		14.8981	25.6796	4.4463	38.6761	4.97227	4.42911	3.39496	4.10629	2.7979	14.6904	4.38027	3.11335
ENSDARG00000004049	marcksa	ENSDART00000186743;ENSDART00000123096	GO:0003407(neural retina development);GO:0005516(calmodulin binding);GO:0005575(cellular_component);GO:0007417(central nervous system development);GO:0007420(brain development);GO:0010842(retina layer formation);GO:0035914(skeletal muscle cell differentiation);GO:0051216(cartilage development);GO:0060541(respiratory system development);GO:0060541(respiratory system development)				myristoylated alanine-rich protein kinase C substrate a [Source:ZFIN;Acc:ZDB-GENE-050522-145]		1.19114	0.64473	0.845482	4.10883	0.223058	1.50094	1.17517	0.653266	0.614175	0.277255	0.36258	0.832553
ENSDARG00000004051	CR354540	ENSDART00000012822	GO:0004497(monooxygenase activity);GO:0005506(iron ion binding);GO:0005623(cell);GO:0006699(bile acid biosynthetic process);GO:0006707(cholesterol catabolic process);GO:0008123(cholesterol 7-alpha-monooxygenase activity);GO:0016705(oxidoreductase activity, acting on paired donors, with incorporation or reduction of molecular oxygen);GO:0020037(heme binding);GO:0042632(cholesterol homeostasis);GO:…				cytochrome P450, family 7, subfamily A, polypeptide 1b [Source:NCBI gene;Acc:559097]		2.47223	1.17998	1.31228	0.157231	0.615527	0.872659	1.20485	4.13856	0.470498	1.24496	0.975028	0.207206
ENSDARG00000004055	uhrf1bp1l	ENSDART00000046871;ENSDART00000179075;ENSDART00000135330					UHRF1 binding protein 1-like [Source:ZFIN;Acc:ZDB-GENE-041210-177]		3.39329	8.45639	8.81211	2.05783	2.39101	1.9698	3.15745	7.35738	1.63338	3.52611	2.62988	1.83355
ENSDARG00000004059	galk2	ENSDART00000012600	GO:0004335(galactokinase activity);GO:0005524(ATP binding);GO:0005534(galactose binding);GO:0005737(cytoplasm);GO:0005829(cytosol);GO:0006012(galactose metabolic process);GO:0016301(kinase activity);GO:0016773(phosphotransferase activity, alcohol group as acceptor);GO:0033499(galactose catabolic process via UDP-galactose);GO:0046835(carbohydrate phosphorylation)		K18674	EC:2.7.1.157	galactokinase 2 [Source:ZFIN;Acc:ZDB-GENE-041114-143]		5.65144	9.47942	4.67602	3.48996	3.47392	5.04518	2.41526	3.16235	1.09286	4.39241	4.08992	2.24484
ENSDARG00000004060	bhlhe40	ENSDART00000026017	GO:0000977(RNA polymerase II regulatory region sequence-specific DNA binding);GO:0001756(somitogenesis);GO:0003677(DNA binding);GO:0003714(transcription corepressor activity);GO:0005634(nucleus);GO:0006355(regulation of transcription, DNA-templated);GO:0007219(Notch signaling pathway);GO:0008134(transcription factor binding);GO:0030154(cell differentiation);GO:0032922(circadian regulation of gene…		K03729		basic helix-loop-helix family, member e40 [Source:ZFIN;Acc:ZDB-GENE-030131-3133]		47.1718	41.4725	140.22	4.42492	44.7008	90.147	58.5213	79.9692	74.5665	14.0821	92.1863	47.4383
ENSDARG00000004074	bach2b	ENSDART00000131857;ENSDART00000153464	GO:0003677(DNA binding);GO:0003700(DNA-binding transcription factor activity);GO:0005515(protein binding);GO:0005634(nucleus);GO:0006355(regulation of transcription, DNA-templated);GO:0006355(regulation of transcription, DNA-templated)		K09042		BTB and CNC homology 1, basic leucine zipper transcription factor 2b [Source:ZFIN;Acc:ZDB-GENE-041001-139]		0.195681	0.127579	0.389951	0.170056	0.4592	0.7546	0.435362	0.31092	0.548124	0.128215	0.359067	0.62165
ENSDARG00000004078	acsl4a	ENSDART00000006489;ENSDART00000186495	GO:0003824(catalytic activity);GO:0009953(dorsal/ventral pattern formation);GO:0016020(membrane);GO:0016021(integral component of membrane);GO:0030513(positive regulation of BMP signaling pathway);GO:0051896(regulation of protein kinase B signaling);GO:1900744(regulation of p38MAPK cascade);GO:1900744(regulation of p38MAPK cascade)	00061(Fatty acid biosynthesis);00071(Fatty acid degradation);03320(PPAR signaling pathway);04146(Peroxisome);04216(Ferroptosis);04920(Adipocytokine signaling pathway);04920(Adipocytokine signaling pathway)	K01897	EC:6.2.1.3	acyl-CoA synthetase long chain family member 4a [Source:ZFIN;Acc:ZDB-GENE-040426-1565]		37.9257	29.5252	8.90952	11.7083	11.3261	5.26959	19.4529	29.3818	4.5022	14.8991	7.14022	7.4059		25.4535	9.43466	17.7789	9.81509
ENSDARG00000004082	cx39	ENSDART00000013745;ENSDART00000125161	GO:0005886(plasma membrane);GO:0005921(gap junction);GO:0005922(connexin complex);GO:0007154(cell communication);GO:0010644(cell communication by electrical coupling);GO:0016020(membrane);GO:0016021(integral component of membrane);GO:0030054(cell junction);GO:0031444(slow-twitch skeletal muscle fiber contraction);GO:0031444(slow-twitch skeletal muscle fiber contraction)		K07612		connexin 39.9 [Source:ZFIN;Acc:ZDB-GENE-040406-2]		0.859868	2.52314	9.88954	0.0645861	4.63591	1.38576	0.691718	0.421782	1.28363	0.17753	0.836438	0.45885
ENSDARG00000004094	acsbg2	ENSDART00000012120;ENSDART00000124809	GO:0003824(catalytic activity);GO:0003824(catalytic activity)	00061(Fatty acid biosynthesis);00071(Fatty acid degradation);03320(PPAR signaling pathway);04920(Adipocytokine signaling pathway);04920(Adipocytokine signaling pathway)	K15013	EC:6.2.1.3	acyl-CoA synthetase bubblegum family member 2 [Source:ZFIN;Acc:ZDB-GENE-030131-7099]		19.1269	17.0557	10.5956	19.8825	7.41338	12.1771	12.9993	16.8411	4.48769	11.5756	15.4519	7.12612		15.5927	13.1577	11.4427	11.3846
ENSDARG00000004105	tie1	ENSDART00000184003;ENSDART00000190702;ENSDART00000192502;ENSDART00000191183;ENSDART00000003701	GO:0000166(nucleotide binding);GO:0004672(protein kinase activity);GO:0004713(protein tyrosine kinase activity);GO:0004714(transmembrane receptor protein tyrosine kinase activity);GO:0005515(protein binding);GO:0005524(ATP binding);GO:0006468(protein phosphorylation);GO:0016020(membrane);GO:0016021(integral component of membrane);GO:0016301(kinase activity);GO:0016310(phosphorylation);GO:0016740(…		K05120	EC:2.7.10.1	tyrosine kinase with immunoglobulin-like and EGF-like domains 1 [Source:ZFIN;Acc:ZDB-GENE-990415-55]		1.8721	0.904416	2.48669	0.178011	1.78995	2.69336	1.81023	2.04961	2.44656	0.448904	2.47708	3.45895
ENSDARG00000004111	esr1	ENSDART00000087844;ENSDART00000192966;ENSDART00000024518;ENSDART00000166190	GO:0003677(DNA binding);GO:0003700(DNA-binding transcription factor activity);GO:0003707(steroid hormone receptor activity);GO:0005496(steroid binding);GO:0005634(nucleus);GO:0006355(regulation of transcription, DNA-templated);GO:0008270(zinc ion binding);GO:0008289(lipid binding);GO:0030284(estrogen receptor activity);GO:0043401(steroid hormone mediated signaling pathway);GO:0043565(sequence-spe…		K08550		estrogen receptor 1 [Source:ZFIN;Acc:ZDB-GENE-020806-5]		6.34753	1.61921	0.344462	0.127772	0.144914	0.301909	0.0928396	0.6083	0.12307	13.7597	0.131784	0.0191734
ENSDARG00000004114	tti1	ENSDART00000022498		04150(mTOR signaling pathway)	K20403		TELO2 interacting protein 1 [Source:ZFIN;Acc:ZDB-GENE-080819-3]		1.01346	3.04664	1.20799	0.787778	0.59288	1.67867	0.885395	0.910714	0.70534	1.58869	0.716367	0.748572
ENSDARG00000004115	mgat4b	ENSDART00000001159	GO:0000139(Golgi membrane);GO:0005794(Golgi apparatus);GO:0006486(protein glycosylation);GO:0008454(alpha-1,3-mannosylglycoprotein 4-beta-N-acetylglucosaminyltransferase activity);GO:0016020(membrane);GO:0016021(integral component of membrane);GO:0016740(transferase activity);GO:0016757(transferase activity, transferring glycosyl groups);GO:0046872(metal ion binding)	00510(N-Glycan biosynthesis)	K00738	EC:2.4.1.145	alpha-1,3-mannosyl-glycoprotein 4-beta-N-acetylglucosaminyltransferase B [Source:ZFIN;Acc:ZDB-GENE-040704-19]		12.4741	13.8626	3.423	25.4487	5.17376	4.15968	3.78319	4.55382	3.36285	9.03203	4.4426	3.84258
ENSDARG00000004130	mvk	ENSDART00000006673	GO:0000166(nucleotide binding);GO:0004496(mevalonate kinase activity);GO:0005524(ATP binding);GO:0005737(cytoplasm);GO:0005829(cytosol);GO:0006629(lipid metabolic process);GO:0006694(steroid biosynthetic process);GO:0006695(cholesterol biosynthetic process);GO:0008202(steroid metabolic process);GO:0008203(cholesterol metabolic process);GO:0008299(isoprenoid biosynthetic process);GO:0016126(sterol…	00900(Terpenoid backbone biosynthesis);04146(Peroxisome)	K00869	EC:2.7.1.36	mevalonate kinase [Source:ZFIN;Acc:ZDB-GENE-041114-37]		5.59674	10.4121	1.15438	16.0853	0.600517	0.551402	1.08071	1.17777	0.562657	7.81461	1.66097	0.669822
ENSDARG00000004131	rttn	ENSDART00000006930;ENSDART00000183176;ENSDART00000142473;ENSDART00000145978	GO:0005515(protein binding);GO:0005813(centrosome);GO:0005814(centriole);GO:0007099(centriole replication);GO:0010457(centriole-centriole cohesion);GO:0032053(ciliary basal body organization);GO:0036064(ciliary basal body);GO:0044782(cilium organization);GO:0044782(cilium organization)		K16484		rotatin [Source:ZFIN;Acc:ZDB-GENE-090609-5]		1.57278	3.12414	1.03149	3.55144	2.45909	2.50573	0.820821	2.00711	0.525383	1.87991	1.30962	0.401636
ENSDARG00000004132	usp19	ENSDART00000132025;ENSDART00000112840;ENSDART00000147778	GO:0006511(ubiquitin-dependent protein catabolic process);GO:0016020(membrane);GO:0016021(integral component of membrane);GO:0016579(protein deubiquitination);GO:0021551(central nervous system morphogenesis);GO:0036459(thiol-dependent ubiquitinyl hydrolase activity);GO:0046872(metal ion binding);GO:0046872(metal ion binding)		K11847	EC:3.4.19.12	ubiquitin specific peptidase 19 [Source:ZFIN;Acc:ZDB-GENE-030131-3055]		8.08768	10.6372	9.72766	12.1215	12.4809	11.9392	10.2506	12.0023	10.5927	6.07325	13.0295	8.9469
ENSDARG00000004141	zgc:92630	ENSDART00000127436	GO:0005575(cellular_component)				zgc:92630 [Source:ZFIN;Acc:ZDB-GENE-040718-449]		21.6994	14.976	22.8008	0.528351	2.83089	3.86496	6.64822	39.8156	1.60949	13.3665	5.67019	5.30375
ENSDARG00000004150	grm2a	ENSDART00000085472	GO:0004930(G protein-coupled receptor activity);GO:0005886(plasma membrane);GO:0005887(integral component of plasma membrane);GO:0007165(signal transduction);GO:0007186(G protein-coupled receptor signaling pathway);GO:0007216(G protein-coupled glutamate receptor signaling pathway);GO:0008066(glutamate receptor activity);GO:0016020(membrane);GO:0016021(integral component of membrane);GO:0051966(re…	04080(Neuroactive ligand-receptor interaction)	K04605		glutamate receptor, metabotropic 2a [Source:ZFIN;Acc:ZDB-GENE-030131-8097]		0.0269199	0.0142727	0.0361801	0.0404458	0.0320233	0.0200931	0.0999701	0.0355451	0	0	0	0
ENSDARG00000004151	rab23	ENSDART00000019983	GO:0000045(autophagosome assembly);GO:0003140(determination of left/right asymmetry in lateral mesoderm);GO:0003924(GTPase activity);GO:0005525(GTP binding);GO:0005776(autophagosome);GO:0006886(intracellular protein transport);GO:0010008(endosome membrane);GO:0032482(Rab protein signal transduction);GO:0035469(determination of pancreatic left/right asymmetry);GO:0061371(determination of heart lef…		K06234		RAB23, member RAS oncogene family [Source:ZFIN;Acc:ZDB-GENE-050522-328]		4.4507	8.10537	3.25241	10.1985	1.93581	2.70929	1.58715	4.4532	0.513933	2.19095	1.42474	1.2633
ENSDARG00000004154	orai1b	ENSDART00000009227	GO:0016020(membrane);GO:0016021(integral component of membrane)	04020(Calcium signaling pathway)	K16056		ORAI calcium release-activated calcium modulator 1b [Source:ZFIN;Acc:ZDB-GENE-050522-100]		2.67307	3.20537	2.59078	7.56924	1.24531	1.74445	0.935242	2.26599	1.03894	2.99245	1.69796	0.898115
ENSDARG00000004158	tmem63c	ENSDART00000156260;ENSDART00000155096;ENSDART00000154711	GO:0005227(calcium activated cation channel activity);GO:0005886(plasma membrane);GO:0016020(membrane);GO:0016021(integral component of membrane);GO:0034220(ion transmembrane transport);GO:0034220(ion transmembrane transport)		K21989		transmembrane protein 63C [Source:ZFIN;Acc:ZDB-GENE-120928-2]		0.0747768	0.0190951	0.113891	0.0456948	0.130908	0.305399	0.206973	0.0776013	0.109743	0.0809146	0.0744461	0.0843026
ENSDARG00000004160	reep3b	ENSDART00000021628	GO:0003674(molecular_function);GO:0005783(endoplasmic reticulum);GO:0005789(endoplasmic reticulum membrane);GO:0005874(microtubule);GO:0006998(nuclear envelope organization);GO:0007049(cell cycle);GO:0007084(mitotic nuclear envelope reassembly);GO:0016020(membrane);GO:0016021(integral component of membrane);GO:0051301(cell division)		K17338		receptor accessory protein 3b [Source:ZFIN;Acc:ZDB-GENE-040426-730]		18.7346	24.5957	36.197	26.5176	33.9499	37.0032	16.3828	23.4974	19.3757	15.2987	39.8293	29.5291
ENSDARG00000004161	ik	ENSDART00000181266;ENSDART00000012396	GO:0005634(nucleus);GO:0007094(mitotic spindle assembly checkpoint);GO:0060047(heart contraction);GO:0060047(heart contraction)		K13109		IK cytokine [Source:ZFIN;Acc:ZDB-GENE-030131-960]		20.197	21.4366	21.0628	27.6772	21.6029	25.3615	20.2324	25.488	15.1256	15.9699	20.8715	15.3534
ENSDARG00000004167	zgc:110366	ENSDART00000131589;ENSDART00000153404;ENSDART00000012119	GO:0004032(alditol:NADP+ 1-oxidoreductase activity);GO:0005575(cellular_component);GO:0005829(cytosol);GO:0008106(alcohol dehydrogenase (NADP+) activity);GO:0016491(oxidoreductase activity);GO:0055114(oxidation-reduction process);GO:0055114(oxidation-reduction process)				zgc:110366 [Source:ZFIN;Acc:ZDB-GENE-050417-302]		3.44543	4.00239	0.843744	2.20961	2.34929	3.69298	4.80433	3.87471	2.37339	2.34954	4.74428	4.6082
ENSDARG00000004169	stmn1a	ENSDART00000164683;ENSDART00000007906;ENSDART00000132662	GO:0005737(cytoplasm);GO:0007019(microtubule depolymerization);GO:0015631(tubulin binding);GO:0031110(regulation of microtubule polymerization or depolymerization);GO:0031175(neuron projection development);GO:0043005(neuron projection);GO:0051493(regulation of cytoskeleton organization);GO:0051493(regulation of cytoskeleton organization)				stathmin 1a [Source:ZFIN;Acc:ZDB-GENE-031006-14]		22.8889	31.7272	4.14722	77.2967	2.17955	15.4403	3.42678	5.47613	2.96881	28.9584	8.13508	3.42407
ENSDARG00000004171	rabac1	ENSDART00000036891;ENSDART00000049148;ENSDART00000188503	GO:0008150(biological_process);GO:0016020(membrane);GO:0016021(integral component of membrane);GO:0016021(integral component of membrane)		K20359		Rab acceptor 1 (prenylated) [Source:ZFIN;Acc:ZDB-GENE-040625-146]		14.5052	19.6334	45.424	12.0535	30.6655	17.4226	10.2409	12.8873	9.61224	7.88805	33.2673	21.8249
ENSDARG00000004173	copa	ENSDART00000048277;ENSDART00000136159;ENSDART00000138874	GO:0000139(Golgi membrane);GO:0005198(structural molecule activity);GO:0005515(protein binding);GO:0005737(cytoplasm);GO:0005794(Golgi apparatus);GO:0006886(intracellular protein transport);GO:0006888(endoplasmic reticulum to Golgi vesicle-mediated transport);GO:0006890(retrograde vesicle-mediated transport, Golgi to endoplasmic reticulum);GO:0006891(intra-Golgi vesicle-mediated transport);GO:001…		K05236		coatomer protein complex, subunit alpha [Source:ZFIN;Acc:ZDB-GENE-020905-2]		47.8795	71.3334	33.1337	89.653	30.4448	32.9634	18.34	24.6683	14.7358	47.1309	36.4641	30.2145
ENSDARG00000004174	cnot1	ENSDART00000125459;ENSDART00000141311;ENSDART00000144339;ENSDART00000148321	GO:0006417(regulation of translation);GO:0030015(CCR4-NOT core complex);GO:0030015(CCR4-NOT core complex)	03018(RNA degradation);03018(RNA degradation)	K12604		CCR4-NOT transcription complex, subunit 1 [Source:ZFIN;Acc:ZDB-GENE-040915-1]		22.7055	30.5741	12.8229	52.2472	15.6341	16.2629	15.1776	31.4709	9.88172	22.786	15.1056	11.5985
ENSDARG00000004176	ulk4	ENSDART00000180930;ENSDART00000060519;ENSDART00000143540;ENSDART00000162229	GO:0004672(protein kinase activity);GO:0005524(ATP binding);GO:0006468(protein phosphorylation);GO:0006468(protein phosphorylation)		K17545	EC:2.7.11.1	unc-51 like kinase 4 [Source:ZFIN;Acc:ZDB-GENE-100922-243]		1.19101	2.45924	0.618445	3.54312	0.471805	0.366873	1.70269	4.60362	0.283919	1.85195	0.338849	0.163007
ENSDARG00000004177	fam169ab	ENSDART00000122015;ENSDART00000186325					family with sequence similarity 169 member Ab [Source:ZFIN;Acc:ZDB-GENE-091118-95]		2.82809	3.8677	1.59476	4.61259	1.56319	2.56053	0.821803	1.90402	1.71735	2.23534	0.443429	0.774251
ENSDARG00000004184	nf1b	ENSDART00000131897	GO:0001568(blood vessel development);GO:0007165(signal transduction);GO:0007507(heart development);GO:0007613(memory);GO:0043087(regulation of GTPase activity);GO:0045685(regulation of glial cell differentiation);GO:0046959(habituation);GO:0060251(regulation of glial cell proliferation);GO:0070373(negative regulation of ERK1 and ERK2 cascade);GO:0070444(oligodendrocyte progenitor proliferation)	04010(MAPK signaling pathway)	K08052		neurofibromin 1b [Source:ZFIN;Acc:ZDB-GENE-091111-4]		0.451911	0.47222	0.15211	0.741882	0.187561	0.39509	0.174906	0.250525	0.085082	0.384214	0.126738	0.063073
ENSDARG00000004187	zgc:122979	ENSDART00000102559	GO:0000122(negative regulation of transcription by RNA polymerase II);GO:0005829(cytosol);GO:0006457(protein folding);GO:0051082(unfolded protein binding);GO:0051085(chaperone cofactor-dependent protein refolding);GO:0051087(chaperone binding)				zgc:122979 [Source:ZFIN;Acc:ZDB-GENE-051127-45]		2.95813	1.79482	0.581898	4.7372	0.92568	0.166176	0.342397	0.818075	0.187105	1.99218	0.286324	0.118402
ENSDARG00000004189	cbx1a	ENSDART00000151788;ENSDART00000143088;ENSDART00000188574	GO:0005634(nucleus);GO:0005634(nucleus)		K11585		chromobox homolog 1a (HP1 beta homolog Drosophila) [Source:ZFIN;Acc:ZDB-GENE-030131-4945]		23.6425	30.5876	7.4316	61.091	2.90249	12.4024	8.83182	15.0477	7.11837	28.0671	9.67971	7.02799
ENSDARG00000004196	tnfsf10l	ENSDART00000101447;ENSDART00000190334;ENSDART00000122113;ENSDART00000124674	GO:0005164(tumor necrosis factor receptor binding);GO:0005515(protein binding);GO:0006955(immune response);GO:0016020(membrane);GO:0016021(integral component of membrane);GO:0046872(metal ion binding);GO:2001238(positive regulation of extrinsic apoptotic signaling pathway);GO:2001238(positive regulation of extrinsic apoptotic signaling pathway)				TNF superfamily member 10, like [Source:ZFIN;Acc:ZDB-GENE-010801-1]		3.57476	0.756249	4.85856	0.781849	10.9069	18.2376	10.4689	11.4726	10.3287	1.161	14.9447	6.89655
ENSDARG00000004199	spam1	ENSDART00000187245;ENSDART00000130678	GO:0003824(catalytic activity);GO:0004415(hyalurononglucosaminidase activity);GO:0005575(cellular_component);GO:0005975(carbohydrate metabolic process);GO:0008152(metabolic process);GO:0016787(hydrolase activity);GO:0016798(hydrolase activity, acting on glycosyl bonds);GO:0016798(hydrolase activity, acting on glycosyl bonds)				sperm adhesion molecule 1 [Source:ZFIN;Acc:ZDB-GENE-050506-63]		0.308582	0	0.0151993	0.00787841	0	0	0	3.15213	0.0296772	0.0134076	0.0273667	0.01715
ENSDARG00000004204	efhc2	ENSDART00000008737;ENSDART00000142788	GO:0005509(calcium ion binding);GO:0005509(calcium ion binding)				EF-hand domain (C-terminal) containing 2 [Source:ZFIN;Acc:ZDB-GENE-031001-10]		0.129487	0.158065	0.264966	0.223265	0.455998	0.161728	12.9871	36.4669	0.0988684	0.271304	0.14972	0.0662502
ENSDARG00000004211	ccdc106a	ENSDART00000011936	GO:0003674(molecular_function);GO:0005575(cellular_component);GO:0008150(biological_process)				coiled-coil domain containing 106a [Source:ZFIN;Acc:ZDB-GENE-050220-4]		14.0061	16.1019	6.56504	21.0927	4.44602	7.39963	8.01036	16.7165	4.55892	9.97312	6.59529	3.51862
ENSDARG00000004218	rnd1b	ENSDART00000109712;ENSDART00000018654	GO:0000166(nucleotide binding);GO:0003924(GTPase activity);GO:0005525(GTP binding);GO:0005622(intracellular);GO:0005737(cytoplasm);GO:0005886(plasma membrane);GO:0005938(cell cortex);GO:0007015(actin filament organization);GO:0007264(small GTPase mediated signal transduction);GO:0007266(Rho protein signal transduction);GO:0008360(regulation of cell shape);GO:0019901(protein kinase binding);GO:003…		K07531		Rho family GTPase 1b [Source:ZFIN;Acc:ZDB-GENE-060315-7]		1.83933	2.2051	0.363917	0.772514	0.387949	0.485804	0.69909	4.50975	0.422561	1.48996	0.142197	0.441118
ENSDARG00000004219	slc6a3	ENSDART00000129303	GO:0005328(neurotransmitter:sodium symporter activity);GO:0006836(neurotransmitter transport);GO:0015293(symporter activity);GO:0016020(membrane);GO:0016021(integral component of membrane);GO:0055085(transmembrane transport)		K05036		solute carrier family 6 (neurotransmitter transporter), member 3 [Source:ZFIN;Acc:ZDB-GENE-010316-1]		0.634003	0.571979	0.114612	1.6351	0	0	0	0	0	1.11001	0.132198	0
ENSDARG00000004227	pde3a	ENSDART00000160308;ENSDART00000133843	GO:0001556(oocyte maturation);GO:0004114(3',5'-cyclic-nucleotide phosphodiesterase activity);GO:0004115(3',5'-cyclic-AMP phosphodiesterase activity);GO:0005829(cytosol);GO:0007165(signal transduction);GO:0008081(phosphoric diester hydrolase activity);GO:0016020(membrane);GO:0016021(integral component of membrane);GO:0016787(hydrolase activity);GO:0019933(cAMP-mediated signaling);GO:0019934(cGMP-m…	00230(Purine metabolism);00230(Purine metabolism)	K19021	EC:3.1.4.17	phosphodiesterase 3A, cGMP-inhibited [Source:ZFIN;Acc:ZDB-GENE-041210-23]		0.36391	0.537413	0.69447	0.158225	0.154887	0.459782	0.275234	0.549396	0.153534	0.0718317	0.0677679	0.268455
ENSDARG00000004232	dlb	ENSDART00000019259;ENSDART00000139585	GO:0005509(calcium ion binding);GO:0007154(cell communication);GO:0007219(Notch signaling pathway);GO:0007275(multicellular organism development);GO:0007399(nervous system development);GO:0016020(membrane);GO:0016021(integral component of membrane);GO:0021536(diencephalon development);GO:0030154(cell differentiation);GO:0030901(midbrain development);GO:0030901(midbrain development)	04330(Notch signaling pathway);04330(Notch signaling pathway)	K06051		deltaB [Source:ZFIN;Acc:ZDB-GENE-980526-114]		0.166743	0.0507775	0.0636584	0.121961	0.15427	0.170262	0.223233	0.132485	0.181786	0.0961613	0.119177	0.558062
ENSDARG00000004243	asic4b	ENSDART00000104716	GO:0005261(cation channel activity);GO:0005272(sodium channel activity);GO:0005886(plasma membrane);GO:0005887(integral component of plasma membrane);GO:0006811(ion transport);GO:0006814(sodium ion transport);GO:0016020(membrane);GO:0016021(integral component of membrane);GO:0034220(ion transmembrane transport);GO:0035725(sodium ion transmembrane transport);GO:0048545(response to steroid hormone)…		K04831		acid-sensing (proton-gated) ion channel family member 4b [Source:ZFIN;Acc:ZDB-GENE-040513-6]		0.017951	0	0.080121	0	0	0.029386	0.057954	0	0	0.201995	0	0
ENSDARG00000004246	slit2	ENSDART00000007531;ENSDART00000183029;ENSDART00000187183;ENSDART00000188521	GO:0001763(morphogenesis of a branching structure);GO:0003262(endocardial progenitor cell migration to the midline involved in heart field formation);GO:0005509(calcium ion binding);GO:0005515(protein binding);GO:0005576(extracellular region);GO:0007411(axon guidance);GO:0007414(axonal defasciculation);GO:0021952(central nervous system projection neuron axonogenesis);GO:0030517(negative regulatio…		K06839		slit homolog 2 (Drosophila) [Source:ZFIN;Acc:ZDB-GENE-010306-3]		0.508613	0.21986	0.463647	0.201044	0.823689	1.29073	1.45593	0.733112	1.4483	0.235001	1.24231	1.42603
ENSDARG00000004251	dhfr	ENSDART00000010041	GO:0001947(heart looping);GO:0003007(heart morphogenesis);GO:0003232(bulbus arteriosus development);GO:0004146(dihydrofolate reductase activity);GO:0005739(mitochondrion);GO:0046452(dihydrofolate metabolic process);GO:0046654(tetrahydrofolate biosynthetic process);GO:0046655(folic acid metabolic process);GO:0048598(embryonic morphogenesis);GO:0050661(NADP binding);GO:0055114(oxidation-reduction p…	00670(One carbon pool by folate);00790(Folate biosynthesis)	K00287	EC:1.5.1.3	dihydrofolate reductase [Source:ZFIN;Acc:ZDB-GENE-010406-5]		7.69449	11.7817	6.90887	18.7735	0.995786	7.07271	4.36884	8.10356	0.780813	7.61358	3.77883	1.77453
ENSDARG00000004256	wnt11	ENSDART00000013590	GO:0005102(signaling receptor binding);GO:0005576(extracellular region);GO:0007275(multicellular organism development);GO:0016055(Wnt signaling pathway)	04150(mTOR signaling pathway);04310(Wnt signaling pathway);04916(Melanogenesis)	K01384		wingless-type MMTV integration site family, member 11 [Source:ZFIN;Acc:ZDB-GENE-990603-12]		0.744014	1.36511	0.191312	1.52227	0.209328	0.270603	0.29107	0.28084	0	0.270434	0.376019	0.152124
ENSDARG00000004260	cul5b	ENSDART00000130179;ENSDART00000172573	GO:0006511(ubiquitin-dependent protein catabolic process);GO:0016567(protein ubiquitination);GO:0019005(SCF ubiquitin ligase complex);GO:0031146(SCF-dependent proteasomal ubiquitin-dependent protein catabolic process);GO:0031461(cullin-RING ubiquitin ligase complex);GO:0031466(Cul5-RING ubiquitin ligase complex);GO:0031625(ubiquitin protein ligase binding);GO:0043161(proteasome-mediated ubiquitin…	04120(Ubiquitin mediated proteolysis);04120(Ubiquitin mediated proteolysis)	K10612		cullin 5b [Source:ZFIN;Acc:ZDB-GENE-091113-45]		0.760825	0.998529	0.101061	1.83399	0.071019	0.189654	0.360912	1.09753	0.105053	0.993674	0	0.15245
ENSDARG00000004261	tmed9	ENSDART00000020582	GO:0003674(molecular_function);GO:0005783(endoplasmic reticulum);GO:0005789(endoplasmic reticulum membrane);GO:0005793(endoplasmic reticulum-Golgi intermediate compartment);GO:0005794(Golgi apparatus);GO:0006886(intracellular protein transport);GO:0006888(endoplasmic reticulum to Golgi vesicle-mediated transport);GO:0007030(Golgi organization);GO:0016020(membrane);GO:0016021(integral component of…		K20346		transmembrane p24 trafficking protein 9 [Source:ZFIN;Acc:ZDB-GENE-050417-434]		49.4336	62.8629	38.4211	99.3467	41.7571	39.0696	25.4798	23.9507	19.2894	43.7972	56.9836	44.9654
ENSDARG00000004262	cyp46a1	ENSDART00000057699	GO:0005506(iron ion binding);GO:0006707(cholesterol catabolic process);GO:0016705(oxidoreductase activity, acting on paired donors, with incorporation or reduction of molecular oxygen);GO:0020037(heme binding);GO:0033781(cholesterol 24-hydroxylase activity);GO:0055114(oxidation-reduction process)	00120(Primary bile acid biosynthesis)	K07440	EC:1.14.14.25	cytochrome P450, family 46, subfamily A, polypeptide 1, tandem duplicate 2 [Source:ZFIN;Acc:ZDB-GENE-040426-1184]		56.1838	7.47704	10.0321	2.00697	6.92732	4.20523	12.5757	38.8041	3.49725	9.44055	3.72978	1.48048
ENSDARG00000004270	atl3	ENSDART00000186961;ENSDART00000139552;ENSDART00000191666;ENSDART00000023054;ENSDART00000139975;ENSDART00000144921	GO:0000166(nucleotide binding);GO:0003924(GTPase activity);GO:0005525(GTP binding);GO:0016020(membrane);GO:0016021(integral component of membrane);GO:0016021(integral component of membrane)		K17339	EC:3.6.5.-	atlastin 3 [Source:ZFIN;Acc:ZDB-GENE-041010-109]		14.8827	21.855	12.105	31.37	13.0724	12.7177	7.26378	11.3783	6.13861	13.2757	14.8866	10.1576
ENSDARG00000004274	zgc:112496	ENSDART00000066583	GO:0003677(DNA binding);GO:0003824(catalytic activity);GO:0006281(DNA repair)				zgc:112496 [Source:ZFIN;Acc:ZDB-GENE-050320-25]		7.23278	14.8746	3.34792	19.7302	0.906984	2.81391	2.27773	6.41386	1.61163	11.9146	2.45133	1.08968
ENSDARG00000004280	seh1l	ENSDART00000013865;ENSDART00000151535;ENSDART00000151214;ENSDART00000151637	GO:0000775(chromosome, centromeric region);GO:0000776(kinetochore);GO:0000777(condensed chromosome kinetochore);GO:0005198(structural molecule activity);GO:0005515(protein binding);GO:0005634(nucleus);GO:0005643(nuclear pore);GO:0005694(chromosome);GO:0005764(lysosome);GO:0005765(lysosomal membrane);GO:0006999(nuclear pore organization);GO:0007049(cell cycle);GO:0007059(chromosome segregation);GO…	03013(RNA transport);04150(mTOR signaling pathway);04150(mTOR signaling pathway)	K14299		SEH1-like (S. cerevisiae) [Source:ZFIN;Acc:ZDB-GENE-030131-6689]		11.3688	16.7209	6.48358	23.6234	6.17058	8.06834	4.80847	8.45254	3.58779	11.5347	8.03589	5.27237
ENSDARG00000004282	zgc:77375	ENSDART00000005923	GO:0005739(mitochondrion);GO:0046474(glycerophospholipid biosynthetic process)				zgc:77375 [Source:ZFIN;Acc:ZDB-GENE-040426-1827]		0.765355	1.53245	9.57843	0.081529	2.25149	2.38675	1.2741	4.84324	0.071674	0.179563	0.627314	0.594301
ENSDARG00000004291	hecw1b	ENSDART00000142835	GO:0000209(protein polyubiquitination);GO:0004842(ubiquitin-protein transferase activity);GO:0005515(protein binding);GO:0005737(cytoplasm);GO:0006511(ubiquitin-dependent protein catabolic process);GO:0016567(protein ubiquitination);GO:0016740(transferase activity);GO:0043161(proteasome-mediated ubiquitin-dependent protein catabolic process);GO:0045732(positive regulation of protein catabolic pro…		K12167	EC:2.3.2.26	HECT, C2 and WW domain containing E3 ubiquitin protein ligase 1b [Source:ZFIN;Acc:ZDB-GENE-060503-2]		0.195406	0.330681	0.122875	0.377503	0	0.119303	0.129078	0.156848	0.012072	0.29379	0.051549	0
ENSDARG00000004296	ambp	ENSDART00000027026;ENSDART00000135457;ENSDART00000130283;ENSDART00000193648;ENSDART00000142677;ENSDART00000135645	GO:0004867(serine-type endopeptidase inhibitor activity);GO:0005886(plasma membrane);GO:0009986(cell surface);GO:0010951(negative regulation of endopeptidase activity);GO:0010951(negative regulation of endopeptidase activity)				alpha-1-microglobulin/bikunin precursor [Source:ZFIN;Acc:ZDB-GENE-040426-1608]		282.211	78.7052	1.22495	7.76046	0.49394	1.25076	7.49228	519.482	0.485813	89.6393	3.63639	0.41405
ENSDARG00000004297	irf2bpl	ENSDART00000015418	GO:0000977(RNA polymerase II regulatory region sequence-specific DNA binding);GO:0001228(DNA-binding transcription activator activity, RNA polymerase II-specific);GO:0005575(cellular_component);GO:0005634(nucleus);GO:0045944(positive regulation of transcription by RNA polymerase II)		K22383		interferon regulatory factor 2 binding protein-like [Source:ZFIN;Acc:ZDB-GENE-040426-1968]		2.12646	6.51694	20.1939	4.56334	2.99283	2.69636	3.35042	2.18974	2.08555	1.73209	2.51185	2.14604
ENSDARG00000004301	rhogb	ENSDART00000022562;ENSDART00000187572	GO:0000166(nucleotide binding);GO:0003924(GTPase activity);GO:0005525(GTP binding);GO:0005622(intracellular);GO:0005737(cytoplasm);GO:0005886(plasma membrane);GO:0005938(cell cortex);GO:0007015(actin filament organization);GO:0007163(establishment or maintenance of cell polarity);GO:0007264(small GTPase mediated signal transduction);GO:0007266(Rho protein signal transduction);GO:0008360(regulatio…	05132(Salmonella infection);05132(Salmonella infection)	K07863		ras homolog family member Gb [Source:ZFIN;Acc:ZDB-GENE-030131-8877]		5.44629	3.25932	5.1457	0.271361	8.88623	7.4923	4.48619	6.18384	3.0071	1.20277	4.38447	3.29893
ENSDARG00000004302	slc45a1	ENSDART00000043016;ENSDART00000134560;ENSDART00000183271	GO:0003674(molecular_function);GO:0008506(sucrose:proton symporter activity);GO:0015770(sucrose transport);GO:0016020(membrane);GO:0016021(integral component of membrane);GO:0055085(transmembrane transport);GO:0055085(transmembrane transport)				solute carrier family 45, member 1 [Source:ZFIN;Acc:ZDB-GENE-070112-2152]		0.338267	0.152312	0.174895	0.477879	0.100311	0.209643	0.173563	0.26408	0.142594	0.0237182	0.0422979	0.210313
ENSDARG00000004305	vangl1	ENSDART00000036926	GO:0005886(plasma membrane);GO:0007275(multicellular organism development);GO:0016020(membrane);GO:0016021(integral component of membrane)	04310(Wnt signaling pathway)	K04510		VANGL planar cell polarity protein 1 [Source:ZFIN;Acc:ZDB-GENE-040621-2]		0.463025	0.52792	0.465907	1.06295	0.508018	0.86031	0.393533	0.882523	0.489253	0.671533	0.409482	0.95216
ENSDARG00000004306	klhl18	ENSDART00000022909	GO:0005515(protein binding)		K10455		kelch-like family member 18 [Source:ZFIN;Acc:ZDB-GENE-030131-5785]		2.41215	5.41698	1.9452	4.56341	1.3974	1.44659	1.1057	1.5975	0.662827	3.23547	1.60917	0.998086
ENSDARG00000004307	lypd6	ENSDART00000020884	GO:0005515(protein binding);GO:0005886(plasma membrane);GO:0016020(membrane);GO:0030548(acetylcholine receptor regulator activity);GO:0031225(anchored component of membrane);GO:0045121(membrane raft);GO:0046658(anchored component of plasma membrane);GO:0060061(Spemann organizer formation);GO:0060827(regulation of canonical Wnt signaling pathway involved in neural plate anterior/posterior pattern …				LY6/PLAUR domain containing 6 [Source:ZFIN;Acc:ZDB-GENE-040912-117]		0.51633	0.557109	0.583663	0.288154	2.01711	1.55522	1.13218	0.667883	1.50474	0.29463	0.889743	0.746015
ENSDARG00000004308	fam8a1b	ENSDART00000021533	GO:0003674(molecular_function);GO:0008150(biological_process);GO:0016020(membrane);GO:0016021(integral component of membrane)				family with sequence similarity 8 member A1b [Source:ZFIN;Acc:ZDB-GENE-050410-14]		5.94258	6.76796	3.65503	8.42809	3.14995	4.37092	3.29987	7.14674	2.60092	3.61725	3.95785	3.68464
ENSDARG00000004311	ldlrap1a	ENSDART00000021396	GO:0005515(protein binding);GO:0005575(cellular_component)	04144(Endocytosis)	K12474		low density lipoprotein receptor adaptor protein 1a [Source:ZFIN;Acc:ZDB-GENE-030328-13]		17.3442	29.1635	17.2393	59.9336	4.93351	12.3052	6.33878	5.60907	4.85976	28.0018	6.6355	3.51225
ENSDARG00000004318	cbwd	ENSDART00000012132	GO:0003674(molecular_function);GO:0005575(cellular_component);GO:0008150(biological_process)				COBW domain containing [Source:ZFIN;Acc:ZDB-GENE-040426-2388]		6.94189	4.10433	4.68045	10.5144	4.59677	12.2015	6.97803	6.15346	4.40052	3.50465	6.86452	7.70463
ENSDARG00000004322	ush1ga	ENSDART00000188412;ENSDART00000023265	GO:0005515(protein binding);GO:0007605(sensory perception of sound);GO:0050953(sensory perception of light stimulus);GO:0050957(equilibrioception);GO:0050957(equilibrioception)		K21878		Usher syndrome 1Ga (autosomal recessive) [Source:ZFIN;Acc:ZDB-GENE-131120-173]		0.0109936	0.0393877	0.069989	0	0.0359547	0.0568303	0.0646393	0.201598	0.039662	0	0.0264543	0.0596424
ENSDARG00000004325	casp9	ENSDART00000047020;ENSDART00000137574	GO:0001822(kidney development);GO:0004197(cysteine-type endopeptidase activity);GO:0005737(cytoplasm);GO:0006508(proteolysis);GO:0006915(apoptotic process);GO:0008233(peptidase activity);GO:0008234(cysteine-type peptidase activity);GO:0016787(hydrolase activity);GO:0042981(regulation of apoptotic process);GO:0043065(positive regulation of apoptotic process);GO:0048696(regulation of collateral spr…	04115(p53 signaling pathway);04210(Apoptosis);04370(VEGF signaling pathway);05168(Herpes simplex virus 1 infection);05168(Herpes simplex virus 1 infection)	K04399	EC:3.4.22.62	caspase 9, apoptosis-related cysteine peptidase [Source:ZFIN;Acc:ZDB-GENE-030825-5]		4.31962	22.228	27.9269	7.60942	4.76144	3.69416	2.02924	3.46128	1.69645	4.2997	3.58753	2.85076
ENSDARG00000004336	exoc4	ENSDART00000021384	GO:0000145(exocyst);GO:0006612(protein targeting to membrane);GO:0006887(exocytosis);GO:0006893(Golgi to plasma membrane transport);GO:0006904(vesicle docking involved in exocytosis);GO:0007268(chemical synaptic transmission);GO:0032584(growth cone membrane);GO:0045202(synapse);GO:0090522(vesicle tethering involved in exocytosis)		K06111		exocyst complex component 4 [Source:ZFIN;Acc:ZDB-GENE-041210-112]		3.59175	3.5754	2.67479	4.34762	2.96098	3.85743	2.36054	4.67032	2.08814	1.69422	2.69214	2.70496
ENSDARG00000004343	nelfe	ENSDART00000187396;ENSDART00000188978;ENSDART00000149988;ENSDART00000148439;ENSDART00000148877;ENSDART00000148613	GO:0003676(nucleic acid binding);GO:0003723(RNA binding);GO:0006355(regulation of transcription, DNA-templated);GO:0032021(NELF complex);GO:1901534(positive regulation of hematopoietic progenitor cell differentiation);GO:1902038(positive regulation of hematopoietic stem cell differentiation);GO:1902038(positive regulation of hematopoietic stem cell differentiation)		K15182		negative elongation factor complex member E [Source:ZFIN;Acc:ZDB-GENE-040718-69]		5.77697	8.9071	3.77662	9.71991	5.41917	5.69846	5.15277	5.02173	3.26489	5.94733	7.09099	3.01678
ENSDARG00000004358	gnb3a	ENSDART00000012673	GO:0005515(protein binding);GO:0007165(signal transduction)	04371(Apelin signaling pathway)	K07825		guanine nucleotide binding protein (G protein), beta polypeptide 3a [Source:ZFIN;Acc:ZDB-GENE-040718-134]		0.320134	0.881631	0.09467	0.066184	0.139055	0.489723	0.102716	0.125458	0.070937	0.334333	0.17133	0.117023
ENSDARG00000004363	lhfpl6	ENSDART00000182579;ENSDART00000019416;ENSDART00000185634	GO:0003674(molecular_function);GO:0016020(membrane);GO:0016021(integral component of membrane);GO:0016021(integral component of membrane)				LHFPL tetraspan subfamily member 6 [Source:ZFIN;Acc:ZDB-GENE-041212-82]		1.25763	1.52127	1.16253	0.122997	2.02944	1.68619	1.50478	1.39466	1.253	0.413742	0.831449	1.37041
ENSDARG00000004372	fmnl3	ENSDART00000109023;ENSDART00000147440;ENSDART00000144554	GO:0001525(angiogenesis);GO:0002040(sprouting angiogenesis);GO:0003779(actin binding);GO:0005515(protein binding);GO:0005737(cytoplasm);GO:0005886(plasma membrane);GO:0007010(cytoskeleton organization);GO:0007275(multicellular organism development);GO:0008360(regulation of cell shape);GO:0016020(membrane);GO:0016043(cellular component organization);GO:0016477(cell migration);GO:0017048(Rho GTPase…				formin-like 3 [Source:ZFIN;Acc:ZDB-GENE-030131-1571]		1.34302	0.735881	2.33272	0.246651	1.49067	3.71745	2.3365	2.51922	2.19539	0.71566	1.96063	2.95115
ENSDARG00000004377	ppp1r13ba	ENSDART00000037371;ENSDART00000146822;ENSDART00000135891;ENSDART00000105050;ENSDART00000152005	GO:0002039(p53 binding);GO:0005515(protein binding);GO:0005634(nucleus);GO:0006915(apoptotic process);GO:0008134(transcription factor binding);GO:0045786(negative regulation of cell cycle);GO:0045786(negative regulation of cell cycle)		K17554		protein phosphatase 1, regulatory subunit 13Ba [Source:ZFIN;Acc:ZDB-GENE-030131-9805]		3.2979	5.79921	14.3746	1.51296	14.7984	12.5225	9.96611	5.68458	10.9868	2.32397	12.3517	6.74996
ENSDARG00000004378	yrk	ENSDART00000148287;ENSDART00000149856;ENSDART00000136695;ENSDART00000147290;ENSDART00000143353	GO:0000166(nucleotide binding);GO:0004672(protein kinase activity);GO:0004713(protein tyrosine kinase activity);GO:0004715(non-membrane spanning protein tyrosine kinase activity);GO:0005102(signaling receptor binding);GO:0005515(protein binding);GO:0005524(ATP binding);GO:0006468(protein phosphorylation);GO:0007169(transmembrane receptor protein tyrosine kinase signaling pathway);GO:0016301(kinas…		K17511	EC:2.7.10.2	Yes-related kinase [Source:ZFIN;Acc:ZDB-GENE-030131-9517]		4.51289	2.51842	7.27888	0.483649	7.48065	7.5332	5.80037	4.50681	6.00287	1.18372	7.39242	5.06679
ENSDARG00000004386	si:dkey-153k10	ENSDART00000004604	GO:0016020(membrane);GO:0016021(integral component of membrane)				si:dkey-153k10.9 [Source:ZFIN;Acc:ZDB-GENE-030131-3893]		0.173614	0.209252	0.35746	0	0.383398	0.090572	0.712684	0.831882	0.112028	0.118677	0.075437	0.151384
ENSDARG00000004392	hdr	ENSDART00000121886;ENSDART00000005025	GO:0005515(protein binding);GO:0005886(plasma membrane);GO:0007165(signal transduction);GO:0009986(cell surface);GO:0016020(membrane);GO:0016021(integral component of membrane);GO:0036462(TRAIL-activated apoptotic signaling pathway);GO:0043065(positive regulation of apoptotic process);GO:0043280(positive regulation of cysteine-type endopeptidase activity involved in apoptotic process);GO:0043280(…	04060(Cytokine-cytokine receptor interaction);04210(Apoptosis);04217(Necroptosis);04217(Necroptosis)	K04722		hematopoietic death receptor [Source:ZFIN;Acc:ZDB-GENE-030826-5]		12.6676	20.1869	3.9255	38.8332	0.820165	2.21923	3.41311	9.91539	2.94532	15.2306	2.00813	0.630289
ENSDARG00000004396	b3gnt5b	ENSDART00000136074	GO:0000139(Golgi membrane);GO:0005794(Golgi apparatus);GO:0006486(protein glycosylation);GO:0008378(galactosyltransferase activity);GO:0016020(membrane);GO:0016021(integral component of membrane);GO:0016740(transferase activity);GO:0016757(transferase activity, transferring glycosyl groups)	00601(Glycosphingolipid biosynthesis - lacto and neolacto series)	K03766	EC:2.4.1.206	UDP-GlcNAc:betaGal beta-1,3-N-acetylglucosaminyltransferase 5b [Source:ZFIN;Acc:ZDB-GENE-041010-166]		16.6483	32.859	6.74291	40.2887	2.03726	4.0413	2.96599	7.74158	1.03719	14.9371	4.22181	1.70976
ENSDARG00000004402	elovl6	ENSDART00000105602	GO:0005783(endoplasmic reticulum);GO:0005789(endoplasmic reticulum membrane);GO:0006629(lipid metabolic process);GO:0006631(fatty acid metabolic process);GO:0006633(fatty acid biosynthetic process);GO:0006636(unsaturated fatty acid biosynthetic process);GO:0009922(fatty acid elongase activity);GO:0016020(membrane);GO:0016021(integral component of membrane);GO:0016740(transferase activity);GO:0019…	00062(Fatty acid elongation);01040(Biosynthesis of unsaturated fatty acids)	K10203	EC:2.3.1.199	ELOVL fatty acid elongase 6 [Source:ZFIN;Acc:ZDB-GENE-030114-1]		132.958	48.1747	7.62561	2.71749	3.99296	5.15613	2.82857	82.6655	2.71945	4.65885	8.80585	5.21661
ENSDARG00000004405	snx10a	ENSDART00000108627;ENSDART00000022803;ENSDART00000190659;ENSDART00000187722	GO:0001947(heart looping);GO:0005737(cytoplasm);GO:0005768(endosome);GO:0005813(centrosome);GO:0005815(microtubule organizing center);GO:0005856(cytoskeleton);GO:0008289(lipid binding);GO:0010008(endosome membrane);GO:0015031(protein transport);GO:0016020(membrane);GO:0030030(cell projection organization);GO:0035091(phosphatidylinositol binding);GO:0060271(cilium assembly);GO:0061512(protein loca…		K17924		sorting nexin 10a [Source:ZFIN;Acc:ZDB-GENE-050809-44]		11.4489	27.3511	3.08073	30.9168	2.79003	3.97859	1.36371	1.88605	1.68993	18.9729	3.6435	0.598709
ENSDARG00000004406	spra	ENSDART00000007827	GO:0004757(sepiapterin reductase activity);GO:0005575(cellular_component);GO:0006729(tetrahydrobiopterin biosynthetic process);GO:0055114(oxidation-reduction process)	00790(Folate biosynthesis)	K00072	EC:1.1.1.153	sepiapterin reductase a [Source:ZFIN;Acc:ZDB-GENE-050522-412]		2.26536	0.625915	2.11127	0.651221	3.95444	5.57318	6.23388	10.6879	4.57012	1.00919	3.15501	4.04252
ENSDARG00000004415	tcf7l2	ENSDART00000121527;ENSDART00000183754;ENSDART00000185635;ENSDART00000189099;ENSDART00000153068;ENSDART00000005562;ENSDART00000031408;ENSDART00000125046;ENSDART00000133854;ENSDART00000145967;ENSDART00000128703	GO:0003677(DNA binding);GO:0005634(nucleus);GO:0005667(transcription factor complex);GO:0006355(regulation of transcription, DNA-templated);GO:0006357(regulation of transcription by RNA polymerase II);GO:0008013(beta-catenin binding);GO:0010226(response to lithium ion);GO:0016055(Wnt signaling pathway);GO:0021986(habenula development);GO:0031017(exocrine pancreas development);GO:0032024(positive …	04310(Wnt signaling pathway);04520(Adherens junction);04916(Melanogenesis);04916(Melanogenesis)	K04491		transcription factor 7 like 2 [Source:ZFIN;Acc:ZDB-GENE-991110-8]		1.35011	1.87762	1.70655	0.223941	2.13313	2.75105	3.66622	4.67458	2.26279	0.764442	3.10394	1.72819
ENSDARG00000004427	dpy30	ENSDART00000024743;ENSDART00000134065	GO:0035162(embryonic hemopoiesis);GO:0044666(MLL3/4 complex);GO:0048188(Set1C/COMPASS complex);GO:0051568(histone H3-K4 methylation);GO:0051568(histone H3-K4 methylation)		K14965		dpy-30 histone methyltransferase complex regulatory subunit [Source:ZFIN;Acc:ZDB-GENE-040718-136]		17.2116	26.1292	31.7267	25.702	21.5688	16.2983	16.3376	26.0556	9.03715	11.5953	18.4377	11.775
ENSDARG00000004433	btk	ENSDART00000148737	GO:0000166(nucleotide binding);GO:0002250(adaptive immune response);GO:0004672(protein kinase activity);GO:0004713(protein tyrosine kinase activity);GO:0004715(non-membrane spanning protein tyrosine kinase activity);GO:0005515(protein binding);GO:0005524(ATP binding);GO:0006468(protein phosphorylation);GO:0009952(anterior/posterior pattern specification);GO:0016301(kinase activity);GO:0016310(pho…		K07370	EC:2.7.10.2	Bruton agammaglobulinemia tyrosine kinase [Source:ZFIN;Acc:ZDB-GENE-070531-1]		1.8735	1.96138	2.51601	0.532268	1.7703	3.87638	1.53697	3.8132	1.64695	1.54479	1.24246	2.0191
ENSDARG00000004436	fam92a1	ENSDART00000146559;ENSDART00000020301;ENSDART00000114714;ENSDART00000134045	GO:0003674(molecular_function);GO:0005737(cytoplasm);GO:0005814(centriole);GO:0005856(cytoskeleton);GO:0030030(cell projection organization);GO:0060271(cilium assembly);GO:0097546(ciliary base);GO:0097546(ciliary base)				family with sequence similarity 92 member A1 [Source:ZFIN;Acc:ZDB-GENE-040801-123]		1.83926	1.49624	1.21895	7.09304	0.34496	0.869958	3.28611	7.87037	1.20288	3.15402	0.793722	0.475284
ENSDARG00000004445	grm5a	ENSDART00000193829	GO:0004930(G protein-coupled receptor activity);GO:0005886(plasma membrane);GO:0005887(integral component of plasma membrane);GO:0007165(signal transduction);GO:0007186(G protein-coupled receptor signaling pathway);GO:0007216(G protein-coupled glutamate receptor signaling pathway);GO:0008066(glutamate receptor activity);GO:0016020(membrane);GO:0016021(integral component of membrane);GO:0051966(re…	04020(Calcium signaling pathway);04080(Neuroactive ligand-receptor interaction);04540(Gap junction)	K04604		glutamate receptor, metabotropic 5a [Source:ZFIN;Acc:ZDB-GENE-090821-9]		0	0.044102	0.010908	0.029486	0.008317	0.044799	0.052935	0.086108	0	0.011535	0.021118	0.021855
ENSDARG00000004447	aplnr2	ENSDART00000167209;ENSDART00000074490	GO:0004930(G protein-coupled receptor activity);GO:0007165(signal transduction);GO:0007186(G protein-coupled receptor signaling pathway);GO:0016020(membrane);GO:0016021(integral component of membrane);GO:0016021(integral component of membrane)				apelin receptor 2 [Source:ZFIN;Acc:ZDB-GENE-030131-4347]		1.02241	2.48405	0.407198	4.27336	0.299573	0.280093	0.333472	0.458357	0.172031	3.20122	0.994654	0.157317
ENSDARG00000004451	tnfrsfa	ENSDART00000124871	GO:0005515(protein binding);GO:0007165(signal transduction);GO:0016020(membrane);GO:0016021(integral component of membrane);GO:0043065(positive regulation of apoptotic process)				tumor necrosis factor receptor superfamily, member a [Source:ZFIN;Acc:ZDB-GENE-010802-1]		4.73766	15.7364	11.6185	4.13734	6.74483	6.34638	6.16426	6.1197	3.95241	2.37198	6.57873	7.82009
ENSDARG00000004452	tardbpl	ENSDART00000139223;ENSDART00000141928;ENSDART00000126681;ENSDART00000027255;ENSDART00000189242	GO:0003676(nucleic acid binding);GO:0003690(double-stranded DNA binding);GO:0003723(RNA binding);GO:0003727(single-stranded RNA binding);GO:0003730(mRNA 3'-UTR binding);GO:0005654(nucleoplasm);GO:0005737(cytoplasm);GO:0007409(axonogenesis);GO:0007519(skeletal muscle tissue development);GO:0007626(locomotory behavior);GO:0048514(blood vessel morphogenesis);GO:0048675(axon extension);GO:0070935(3'-…				TAR DNA binding protein, like [Source:ZFIN;Acc:ZDB-GENE-031030-1]		25.8282	35.7516	25.1251	48.8658	17.3804	23.0634	15.917	26.9365	13.4343	23.9509	25.8423	19.1219
ENSDARG00000004455	p2rx5	ENSDART00000014404	GO:0001614(purinergic nucleotide receptor activity);GO:0004931(extracellularly ATP-gated cation channel activity);GO:0005216(ion channel activity);GO:0005524(ATP binding);GO:0005639(integral component of nuclear inner membrane);GO:0005886(plasma membrane);GO:0005887(integral component of plasma membrane);GO:0006811(ion transport);GO:0006812(cation transport);GO:0016020(membrane);GO:0016021(integr…	04020(Calcium signaling pathway);04080(Neuroactive ligand-receptor interaction)	K05219		purinergic receptor P2X, ligand-gated ion channel, 5 [Source:ZFIN;Acc:ZDB-GENE-030319-5]		0.879585	1.4811	7.60914	0.320113	1.25691	6.39011	2.00382	0.701957	5.32541	0.483594	2.74716	3.53091
ENSDARG00000004459	unc119	ENSDART00000151639;ENSDART00000028010	GO:0000281(mitotic cytokinesis);GO:0000922(spindle pole);GO:0005813(centrosome);GO:0007399(nervous system development);GO:0007601(visual perception);GO:0008289(lipid binding);GO:0042953(lipoprotein transport);GO:0045171(intercellular bridge);GO:0048841(regulation of axon extension involved in axon guidance);GO:0051233(spindle midzone);GO:0061098(positive regulation of protein tyrosine kinase acti…				unc-119 lipid binding chaperone B homolog 2 [Source:ZFIN;Acc:ZDB-GENE-030131-7635]		0.127059	2.13688	0.447652	0	0.072038	0	0	0.636208	0	0.6436	0.092174	0
ENSDARG00000004460	desi2	ENSDART00000034935;ENSDART00000166908	GO:0005737(cytoplasm);GO:0006508(proteolysis);GO:0008233(peptidase activity);GO:0016787(hydrolase activity);GO:0036459(thiol-dependent ubiquitinyl hydrolase activity);GO:0060027(convergent extension involved in gastrulation);GO:0060027(convergent extension involved in gastrulation)		K22763	EC:3.4.19.12	desumoylating isopeptidase 2 [Source:ZFIN;Acc:ZDB-GENE-040801-39]		13.8332	30.6132	3.39457	58.608	2.26347	3.40264	2.36487	3.74296	1.1733	28.6226	2.84006	3.5022
ENSDARG00000004470	prkcsh	ENSDART00000133283;ENSDART00000185437;ENSDART00000023814;ENSDART00000136051;ENSDART00000164930	GO:0001889(liver development);GO:0005509(calcium ion binding);GO:0005783(endoplasmic reticulum);GO:0006491(N-glycan processing);GO:0016020(membrane);GO:0016021(integral component of membrane);GO:0048793(pronephros development);GO:0048793(pronephros development)	04141(Protein processing in endoplasmic reticulum);04141(Protein processing in endoplasmic reticulum)	K08288		protein kinase C substrate 80K-H [Source:ZFIN;Acc:ZDB-GENE-040426-770]		13.1028	19.6421	4.67756	25.3508	4.05769	7.26558	4.23501	8.44282	2.12808	15.0549	9.50367	5.94032
ENSDARG00000004472	atat1	ENSDART00000049368;ENSDART00000185426;ENSDART00000103922	GO:0004468(lysine N-acetyltransferase activity, acting on acetyl phosphate as donor);GO:0005737(cytoplasm);GO:0005819(spindle);GO:0005856(cytoskeleton);GO:0005874(microtubule);GO:0005905(clathrin-coated pit);GO:0005925(focal adhesion);GO:0016020(membrane);GO:0016740(transferase activity);GO:0016746(transferase activity, transferring acyl groups);GO:0019799(tubulin N-acetyltransferase activity);GO…		K19573	EC:2.3.1.108	alpha tubulin acetyltransferase 1 [Source:ZFIN;Acc:ZDB-GENE-040426-2120]		0.301348	0.210482	0.339939	0.265193	0.143081	0.488873	0.446463	1.17491	0.224672	0.169644	0.293912	0.237382
ENSDARG00000004473	tbx21	ENSDART00000013980	GO:0003677(DNA binding);GO:0003700(DNA-binding transcription factor activity);GO:0005634(nucleus);GO:0006355(regulation of transcription, DNA-templated)				T-box 21 [Source:ZFIN;Acc:ZDB-GENE-080104-3]		0.296254	1.0691	7.27881	0	1.92052	0.817432	0.60407	0.223474	1.19368	0.096965	0.609553	0.817986
ENSDARG00000004492	pcyt1ab	ENSDART00000027772	GO:0003824(catalytic activity);GO:0004105(choline-phosphate cytidylyltransferase activity);GO:0005575(cellular_component);GO:0005737(cytoplasm);GO:0005783(endoplasmic reticulum);GO:0006657(CDP-choline pathway);GO:0009058(biosynthetic process);GO:0031210(phosphatidylcholine binding)	00440(Phosphonate and phosphinate metabolism);00564(Glycerophospholipid metabolism)	K00968	EC:2.7.7.15	phosphate cytidylyltransferase 1, choline, alpha b [Source:ZFIN;Acc:ZDB-GENE-050522-114]		6.70712	15.7118	7.47101	18.6196	4.29744	4.64916	4.00074	5.34735	2.19062	8.69074	3.9947	2.6887
ENSDARG00000004497	tspan33a	ENSDART00000002770;ENSDART00000111882;ENSDART00000148292	GO:0003674(molecular_function);GO:0005887(integral component of plasma membrane);GO:0007166(cell surface receptor signaling pathway);GO:0016020(membrane);GO:0016021(integral component of membrane);GO:0016021(integral component of membrane)		K17346		tetraspanin 33a [Source:ZFIN;Acc:ZDB-GENE-040718-361]		5.72945	12.5407	9.14802	0.289712	9.14178	10.8934	5.47758	6.98073	4.41364	1.56105	8.62221	5.19319
ENSDARG00000004498	xkr8	ENSDART00000104033	GO:0005886(plasma membrane);GO:0016020(membrane);GO:0016021(integral component of membrane);GO:0043652(engulfment of apoptotic cell);GO:0070782(phosphatidylserine exposure on apoptotic cell surface);GO:1902742(apoptotic process involved in development)				XK, Kell blood group complex subunit-related family, member 8, tandem duplicate 1 [Source:ZFIN;Acc:ZDB-GENE-110106-1]		0.2141	0.566151	1.73918	0.22182	1.13728	0.992925	0.933739	0.75548	0.168188	0.162865	1.11495	2.61786
ENSDARG00000004502	rcor3	ENSDART00000143792	GO:0003677(DNA binding);GO:0003700(DNA-binding transcription factor activity);GO:0003714(transcription corepressor activity);GO:0005634(nucleus);GO:0005667(transcription factor complex);GO:0006355(regulation of transcription, DNA-templated);GO:0008134(transcription factor binding);GO:0017053(transcriptional repressor complex);GO:0044212(transcription regulatory region DNA binding);GO:1903507(nega…				REST corepressor 3 [Source:ZFIN;Acc:ZDB-GENE-050208-371]		2.23482	3.36427	2.92711	6.47624	0.578134	0.623842	0.532626	1.5553	0.416836	0.989985	0.583525	0.4945
ENSDARG00000004517	ppat	ENSDART00000078385	GO:0004044(amidophosphoribosyltransferase activity);GO:0005575(cellular_component);GO:0006164(purine nucleotide biosynthetic process);GO:0006189('de novo' IMP biosynthetic process);GO:0009113(purine nucleobase biosynthetic process);GO:0009116(nucleoside metabolic process);GO:0016740(transferase activity);GO:0016757(transferase activity, transferring glycosyl groups);GO:0046872(metal ion binding);…	00230(Purine metabolism);00250(Alanine, aspartate and glutamate metabolism)	K00764	EC:2.4.2.14	phosphoribosyl pyrophosphate amidotransferase [Source:ZFIN;Acc:ZDB-GENE-041210-323]		14.7722	21.1241	7.70976	35.7316	3.34054	7.4266	3.09557	6.95571	3.04699	13.5849	5.43489	4.38347
ENSDARG00000004525	zgc:63882	ENSDART00000020463	GO:0003674(molecular_function);GO:0005515(protein binding);GO:0005575(cellular_component);GO:0008150(biological_process)				zgc:63882 [Source:ZFIN;Acc:ZDB-GENE-040426-1286]		2.70991	6.47578	5.90807	5.61011	3.35432	3.52475	2.70479	5.66322	1.61541	2.35808	3.53684	2.64766
ENSDARG00000004527	pin4	ENSDART00000026846	GO:0000413(protein peptidyl-prolyl isomerization);GO:0003677(DNA binding);GO:0003755(peptidyl-prolyl cis-trans isomerase activity);GO:0005634(nucleus);GO:0005730(nucleolus);GO:0005737(cytoplasm);GO:0005819(spindle);GO:0005856(cytoskeleton);GO:0016853(isomerase activity)		K09579	EC:5.2.1.8	protein (peptidylprolyl cis/trans isomerase) NIMA-interacting, 4 (parvulin) [Source:ZFIN;Acc:ZDB-GENE-050522-117]		19.1199	24.1678	10.525	34.5981	11.4907	15.1811	9.63794	13.826	9.66737	17.1004	12.4207	10.3753
ENSDARG00000004529	zgc:173742	ENSDART00000006628;ENSDART00000186558;ENSDART00000151641	GO:0003677(DNA binding);GO:0003916(DNA topoisomerase activity);GO:0003917(DNA topoisomerase type I activity);GO:0005694(chromosome);GO:0005730(nucleolus);GO:0006260(DNA replication);GO:0006265(DNA topological change);GO:0006338(chromatin remodeling);GO:0007059(chromosome segregation);GO:0016853(isomerase activity);GO:0031298(replication fork protection complex);GO:0031298(replication fork protect…				zgc:173742 [Source:ZFIN;Acc:ZDB-GENE-030131-6489]		17.0699	40.5243	2.53328	42.8395	0.388038	0.757437	2.32901	4.9279	0.594305	26.5199	1.75048	0.477007
ENSDARG00000004537	kmt2a	ENSDART00000148840;ENSDART00000104525	GO:0003677(DNA binding);GO:0005515(protein binding);GO:0005634(nucleus);GO:0006325(chromatin organization);GO:0006355(regulation of transcription, DNA-templated);GO:0008168(methyltransferase activity);GO:0008270(zinc ion binding);GO:0016740(transferase activity);GO:0018024(histone-lysine N-methyltransferase activity);GO:0021782(glial cell development);GO:0022008(neurogenesis);GO:0030097(hemopoies…	00310(Lysine degradation);00310(Lysine degradation)	K09186	EC:2.1.1.43	lysine (K)-specific methyltransferase 2A [Source:ZFIN;Acc:ZDB-GENE-080521-3]		1.51966	1.45461	2.25371	0.682178	1.42478	3.19303	1.34624	1.77645	1.60202	0.509081	1.40037	0.736861
ENSDARG00000004539	ptgs2a	ENSDART00000006870;ENSDART00000150051	GO:0001516(prostaglandin biosynthetic process);GO:0004601(peroxidase activity);GO:0004666(prostaglandin-endoperoxide synthase activity);GO:0006954(inflammatory response);GO:0006979(response to oxidative stress);GO:0008217(regulation of blood pressure);GO:0019371(cyclooxygenase pathway);GO:0020037(heme binding);GO:0031017(exocrine pancreas development);GO:0048545(response to steroid hormone);GO:00…	00590(Arachidonic acid metabolism);04370(VEGF signaling pathway);04625(C-type lectin receptor signaling pathway);04625(C-type lectin receptor signaling pathway)	K11987	EC:1.14.99.1	prostaglandin-endoperoxide synthase 2a [Source:ZFIN;Acc:ZDB-GENE-020530-2]		3.66891	21.5247	15.8033	0.963997	14.391	16.6343	5.16251	6.26437	7.6029	0.739908	29.2285	9.10519		13.6656	10.6631	6.34326	13.0245
ENSDARG00000004561	prkcg	ENSDART00000142610	GO:0000166(nucleotide binding);GO:0001881(receptor recycling);GO:0004672(protein kinase activity);GO:0004674(protein serine/threonine kinase activity);GO:0004697(protein kinase C activity);GO:0005524(ATP binding);GO:0006468(protein phosphorylation);GO:0008270(zinc ion binding);GO:0016301(kinase activity);GO:0016310(phosphorylation);GO:0016740(transferase activity);GO:0018105(peptidyl-serine phosp…	04010(MAPK signaling pathway);04012(ErbB signaling pathway);04020(Calcium signaling pathway);04070(Phosphatidylinositol signaling system);04150(mTOR signaling pathway);04270(Vascular smooth muscle contraction);04310(Wnt signaling pathway);04370(VEGF signaling pathway);04510(Focal adhesion);04540(Gap junction);04916(Melanogenesis)	K19663	EC:2.7.11.13	protein kinase C, gamma [Source:ZFIN;Acc:ZDB-GENE-090206-1]		0.105513	0	0.044438	0.057386	0	0	0.030885	0.108132	0	0	0.079599	0
ENSDARG00000004574	gtf3c2	ENSDART00000153416;ENSDART00000020969;ENSDART00000145254	GO:0000127(transcription factor TFIIIC complex);GO:0000995(RNA polymerase III general transcription initiation factor activity);GO:0005515(protein binding);GO:0006383(transcription by RNA polymerase III);GO:0006383(transcription by RNA polymerase III)		K15200		general transcription factor IIIC, polypeptide 2, beta [Source:ZFIN;Acc:ZDB-GENE-041014-349]		2.56032	2.54172	0.647218	4.92776	0.801406	0.729353	0.72092	1.85543	0.24859	2.75187	0.598712	0.524546
ENSDARG00000004576	plk4	ENSDART00000043866	GO:0004672(protein kinase activity);GO:0004674(protein serine/threonine kinase activity);GO:0005515(protein binding);GO:0005524(ATP binding);GO:0005814(centriole);GO:0006468(protein phosphorylation);GO:0007099(centriole replication)	04068(FoxO signaling pathway)	K08863	EC:2.7.11.21	polo-like kinase 4 (Drosophila) [Source:ZFIN;Acc:ZDB-GENE-030619-14]		5.54059	7.89321	2.12736	11.1676	0.86969	2.31998	3.47003	6.63584	0.44718	4.56731	1.68478	0.905579
ENSDARG00000004577	zgc:194665	ENSDART00000026401	GO:0003674(molecular_function);GO:0008150(biological_process);GO:0016020(membrane);GO:0016021(integral component of membrane)				zgc:194665 [Source:ZFIN;Acc:ZDB-GENE-080722-38]		0.24553	0.25035	0.123171	0.178306	0.054422	0.164864	0.188512	0.489389	0	0.053911	0.230442	0.16263
ENSDARG00000004580	nmnat2	ENSDART00000003550	GO:0003824(catalytic activity);GO:0009058(biosynthetic process)	00760(Nicotinate and nicotinamide metabolism)	K06210	2.7.7.18;EC:2.7.7.1	nicotinamide nucleotide adenylyltransferase 2 [Source:ZFIN;Acc:ZDB-GENE-030131-8201]		0.29647	0.198022	0.674479	0.025747	0.676915	1.71233	1.13339	0.16561	1.12876	0.047893	0.764628	1.54169
ENSDARG00000004581	sel1l	ENSDART00000012816	GO:0005515(protein binding)	04141(Protein processing in endoplasmic reticulum)	K14026		SEL1L, ERAD E3 ligase adaptor subunit [Source:ZFIN;Acc:ZDB-GENE-041001-122]		18.8664	29.9758	8.41813	47.7959	9.35532	10.7764	6.51311	8.41594	5.60402	19.7382	13.405	6.89705
ENSDARG00000004586	ntrk1	ENSDART00000027013	GO:0000166(nucleotide binding);GO:0002446(neutrophil mediated immunity);GO:0004672(protein kinase activity);GO:0004713(protein tyrosine kinase activity);GO:0004714(transmembrane receptor protein tyrosine kinase activity);GO:0005030(neurotrophin receptor activity);GO:0005515(protein binding);GO:0005524(ATP binding);GO:0005887(integral component of plasma membrane);GO:0006468(protein phosphorylatio…	04010(MAPK signaling pathway);04210(Apoptosis)	K03176	EC:2.7.10.1	neurotrophic tyrosine kinase, receptor, type 1 [Source:ZFIN;Acc:ZDB-GENE-980526-118]		0.04866	0.019376	0	0.039343	0.061081	0	0.035988	0.095356	0.023663	0.036535	0	0
ENSDARG00000004587	kat5a	ENSDART00000147889;ENSDART00000143929;ENSDART00000142420;ENSDART00000032909;ENSDART00000132155;ENSDART00000138902	GO:0000123(histone acetyltransferase complex);GO:0000790(nuclear chromatin);GO:0004402(histone acetyltransferase activity);GO:0005634(nucleus);GO:0006355(regulation of transcription, DNA-templated);GO:0010485(H4 histone acetyltransferase activity);GO:0016573(histone acetylation);GO:0032777(Piccolo NuA4 histone acetyltransferase complex);GO:0035267(NuA4 histone acetyltransferase complex);GO:004239…		K11304	EC:2.3.1.48	K(lysine) acetyltransferase 5a [Source:ZFIN;Acc:ZDB-GENE-040718-57]		6.39544	12.8571	27.2059	9.77681	8.85382	9.54099	6.99081	11.6884	6.98195	5.82336	10.3629	4.59817
ENSDARG00000004588	sox4a	ENSDART00000026992;ENSDART00000191453	GO:0000981(DNA-binding transcription factor activity, RNA polymerase II-specific);GO:0003677(DNA binding);GO:0005634(nucleus);GO:0006355(regulation of transcription, DNA-templated);GO:0006357(regulation of transcription by RNA polymerase II);GO:0030154(cell differentiation);GO:0044798(nuclear transcription factor complex);GO:0045879(negative regulation of smoothened signaling pathway);GO:0061386(…		K09268		SRY (sex determining region Y)-box 4a [Source:ZFIN;Acc:ZDB-GENE-030131-8290]		4.15885	3.09214	10.2506	1.2499	6.0799	14.2057	7.6098	5.68635	6.94122	1.49644	8.33407	8.1172
ENSDARG00000004592	gpr22a	ENSDART00000128807;ENSDART00000013924	GO:0001947(heart looping);GO:0003140(determination of left/right asymmetry in lateral mesoderm);GO:0004930(G protein-coupled receptor activity);GO:0005886(plasma membrane);GO:0005887(integral component of plasma membrane);GO:0007165(signal transduction);GO:0007186(G protein-coupled receptor signaling pathway);GO:0007368(determination of left/right symmetry);GO:0016020(membrane);GO:0016021(integra…		K04319		G protein-coupled receptor 22a [Source:ZFIN;Acc:ZDB-GENE-041210-48]		0.840379	0.103469	0.120519	0.108765	0.310745	0.414798	0.226004	0.504953	0.218642	0.025416	0.224235	0.339644
ENSDARG00000004594	znf800a	ENSDART00000098307;ENSDART00000191254;ENSDART00000153839	GO:0003676(nucleic acid binding);GO:0005575(cellular_component);GO:0008150(biological_process);GO:0008150(biological_process)				zinc finger protein 800a [Source:ZFIN;Acc:ZDB-GENE-041008-151]		1.48684	2.8256	0.879214	3.52356	0.501344	0.843846	1.01722	2.21361	0.525106	1.76323	0.695795	0.471026
ENSDARG00000004597	lrrc4ba	ENSDART00000183790;ENSDART00000150958	GO:0005515(protein binding);GO:0016020(membrane);GO:0016021(integral component of membrane);GO:0016021(integral component of membrane)	04514(Cell adhesion molecules (CAMs));04514(Cell adhesion molecules (CAMs))	K16360		leucine rich repeat containing 4Ba [Source:ZFIN;Acc:ZDB-GENE-080327-25]		0.0427021	0.104903	0.0118066	0.180675	0	0.101936	0	0.0566548	0	0.381216	0.0656546	0.0277312
ENSDARG00000004598	AL845428	ENSDART00000017810	GO:0004930(G protein-coupled receptor activity);GO:0004984(olfactory receptor activity);GO:0005886(plasma membrane);GO:0007165(signal transduction);GO:0007186(G protein-coupled receptor signaling pathway);GO:0007608(sensory perception of smell);GO:0016020(membrane);GO:0016021(integral component of membrane);GO:0050896(response to stimulus);GO:0050911(detection of chemical stimulus involved in sen…		K04257		odorant receptor, family C, subfamily 102, member 2 [Source:NCBI gene;Acc:80357]		0	0.026101	0	0	0	0	0	0	0	0	0.037979	0
ENSDARG00000004616	mtmr2	ENSDART00000020004	GO:0004438(phosphatidylinositol-3-phosphatase activity);GO:0004725(protein tyrosine phosphatase activity);GO:0005737(cytoplasm);GO:0005768(endosome);GO:0005829(cytosol);GO:0006629(lipid metabolic process);GO:0016020(membrane);GO:0016311(dephosphorylation);GO:0016787(hydrolase activity);GO:0016791(phosphatase activity);GO:0031901(early endosome membrane);GO:0035335(peptidyl-tyrosine dephosphorylat…	00562(Inositol phosphate metabolism);04070(Phosphatidylinositol signaling system)	K18081	3.1.3.95;EC:3.1.3.64	myotubularin related protein 2 [Source:ZFIN;Acc:ZDB-GENE-990715-14]		5.22952	6.38579	4.80276	6.27728	3.65844	6.74724	3.38342	4.95531	2.68769	3.28064	5.5897	4.11868
ENSDARG00000004618	stx2a	ENSDART00000026737;ENSDART00000148154	GO:0000149(SNARE binding);GO:0005484(SNAP receptor activity);GO:0005886(plasma membrane);GO:0006886(intracellular protein transport);GO:0006887(exocytosis);GO:0006906(vesicle fusion);GO:0007340(acrosome reaction);GO:0008021(synaptic vesicle);GO:0012505(endomembrane system);GO:0016020(membrane);GO:0016021(integral component of membrane);GO:0016192(vesicle-mediated transport);GO:0030154(cell differ…	04130(SNARE interactions in vesicular transport);04130(SNARE interactions in vesicular transport)	K08486		syntaxin 2a [Source:ZFIN;Acc:ZDB-GENE-040801-80]		2.46272	6.54646	8.13722	0.222016	1.23721	2.46359	1.78857	3.58372	0.935952	0.444819	1.45883	0.873767
ENSDARG00000004621	gpm6ab	ENSDART00000128794;ENSDART00000130324;ENSDART00000148404;ENSDART00000149487;ENSDART00000132402	GO:0005886(plasma membrane);GO:0016020(membrane);GO:0016021(integral component of membrane);GO:0031175(neuron projection development);GO:0051489(regulation of filopodium assembly);GO:0051489(regulation of filopodium assembly)				glycoprotein M6Ab [Source:ZFIN;Acc:ZDB-GENE-030710-8]		1.61404	0.828727	3.95696	0.28065	4.80357	8.93727	6.7196	3.02714	6.9785	0.807256	5.84386	6.92275
ENSDARG00000004627	panx3	ENSDART00000027288;ENSDART00000146116	GO:0001503(ossification);GO:0005886(plasma membrane);GO:0005921(gap junction);GO:0006811(ion transport);GO:0006812(cation transport);GO:0007267(cell-cell signaling);GO:0015267(channel activity);GO:0016020(membrane);GO:0016021(integral component of membrane);GO:0022829(wide pore channel activity);GO:0030054(cell junction);GO:0050716(positive regulation of interleukin-1 secretion);GO:0055085(transm…		K20857		pannexin 3 [Source:ZFIN;Acc:ZDB-GENE-091204-114]		0.672992	1.51308	0.119241	2.94237	0.2099	0.850388	0.837251	1.11668	0.517251	0.132098	0.0563372	2.06126
ENSDARG00000004632	egln1b	ENSDART00000024296	GO:0005506(iron ion binding);GO:0005575(cellular_component);GO:0016491(oxidoreductase activity);GO:0016705(oxidoreductase activity, acting on paired donors, with incorporation or reduction of molecular oxygen);GO:0031418(L-ascorbic acid binding);GO:0046872(metal ion binding);GO:0055114(oxidation-reduction process)				egl-9 family hypoxia-inducible factor 1b [Source:ZFIN;Acc:ZDB-GENE-040718-338]		17.6185	21.5276	27.0491	29.0407	34.1747	26.626	24.5426	21.7714	20.1019	18.4556	34.3416	32.5744
ENSDARG00000004633	epn3b	ENSDART00000152440;ENSDART00000062841		04144(Endocytosis);04144(Endocytosis)	K12471		epsin 3b [Source:ZFIN;Acc:ZDB-GENE-121214-173]		0	0.0286764	0	0.026765	0	0.149982	0.251288	0.537376	0	0.0262713	0	0
ENSDARG00000004634	osbp	ENSDART00000141530;ENSDART00000150326	GO:0005829(cytosol);GO:0005886(plasma membrane);GO:0006869(lipid transport);GO:0008289(lipid binding);GO:0015248(sterol transporter activity);GO:0015918(sterol transport);GO:0016020(membrane);GO:0032934(sterol binding);GO:0043231(intracellular membrane-bounded organelle);GO:0097038(perinuclear endoplasmic reticulum);GO:0097038(perinuclear endoplasmic reticulum)		K20456		oxysterol binding protein [Source:ZFIN;Acc:ZDB-GENE-090312-18]		11.6632	26.468	13.4428	19.0906	4.79281	5.52349	2.75551	8.32042	2.34294	11.5504	3.91139	1.87299
ENSDARG00000004635	epha7	ENSDART00000159122;ENSDART00000102788	GO:0000166(nucleotide binding);GO:0004672(protein kinase activity);GO:0004713(protein tyrosine kinase activity);GO:0004714(transmembrane receptor protein tyrosine kinase activity);GO:0005003(ephrin receptor activity);GO:0005005(transmembrane-ephrin receptor activity);GO:0005515(protein binding);GO:0005524(ATP binding);GO:0005887(integral component of plasma membrane);GO:0006468(protein phosphoryl…		K05108	EC:2.7.10.1	eph receptor A7 [Source:ZFIN;Acc:ZDB-GENE-030131-3745]		0.331004	0.362807	0.403169	0.100583	0.745428	1.18743	0.512116	0.424962	0.475258	0.0940408	0.960487	0.9343
ENSDARG00000004636	ccdc9	ENSDART00000126046;ENSDART00000181674;ENSDART00000027563;ENSDART00000132459	GO:0003674(molecular_function);GO:0005575(cellular_component);GO:0008150(biological_process);GO:0008150(biological_process)				coiled-coil domain containing 9 [Source:ZFIN;Acc:ZDB-GENE-060929-520]		5.00564	6.95392	2.64851	6.73173	3.01923	3.90235	2.80971	3.32678	2.45035	4.24281	3.36347	3.20417
ENSDARG00000004643	cdhr1a	ENSDART00000026679;ENSDART00000110005	GO:0005509(calcium ion binding);GO:0005886(plasma membrane);GO:0005887(integral component of plasma membrane);GO:0007155(cell adhesion);GO:0007156(homophilic cell adhesion via plasma membrane adhesion molecules);GO:0016020(membrane);GO:0016021(integral component of membrane);GO:0016021(integral component of membrane)		K16501		cadherin-related family member 1a [Source:ZFIN;Acc:ZDB-GENE-040924-4]		0.173823	0.3847	0.246297	0.065406	0.0252178	0.239106	0.288898	0.47769	0.10577	0.0665616	0.786125	0.0271334
ENSDARG00000004647	spice1	ENSDART00000012653	GO:0003674(molecular_function);GO:0005814(centriole);GO:0005819(spindle);GO:0046599(regulation of centriole replication);GO:0051310(metaphase plate congression);GO:0090307(mitotic spindle assembly)		K16490		spindle and centriole associated protein 1 [Source:ZFIN;Acc:ZDB-GENE-041212-64]		4.1103	16.6721	2.03516	21.7264	2.03044	0.718074	1.86322	4.58279	0.41201	8.73104	0.844967	0.154495
ENSDARG00000004648	kctd16a	ENSDART00000014411	GO:0005515(protein binding);GO:0051260(protein homooligomerization)		K21918		potassium channel tetramerization domain containing 16a [Source:ZFIN;Acc:ZDB-GENE-060117-1]		0	0	0	0	0.062698	0.148804	0	0	0.123593	0	0	0
ENSDARG00000004658	zgc:101810	ENSDART00000012637	GO:0005524(ATP binding);GO:0005856(cytoskeleton);GO:0005885(Arp2/3 protein complex);GO:0007015(actin filament organization);GO:0034314(Arp2/3 complex-mediated actin nucleation)	04530(Tight junction)	K17260		zgc:101810 [Source:ZFIN;Acc:ZDB-GENE-041121-7]		4.87102	4.65911	17.6101	1.24911	24.9138	49.2011	15.5248	7.95314	15.2812	1.13207	24.6169	13.0544
ENSDARG00000004672	ptk2ab	ENSDART00000191321;ENSDART00000128158;ENSDART00000191106;ENSDART00000190444;ENSDART00000192231;ENSDART00000190168;ENSDART00000189925;ENSDART00000042716;ENSDART00000137745;ENSDART00000122474;ENSDART00000136718;ENSDART00000129594;ENSDART00000132305;ENSDART00000134302;ENSDART00000140441;ENSDART00000145293	GO:0001525(angiogenesis);GO:0004672(protein kinase activity);GO:0004713(protein tyrosine kinase activity);GO:0004715(non-membrane spanning protein tyrosine kinase activity);GO:0005524(ATP binding);GO:0005856(cytoskeleton);GO:0005925(focal adhesion);GO:0006468(protein phosphorylation);GO:0007172(signal complex assembly);GO:0007173(epidermal growth factor receptor signaling pathway);GO:0008104(prot…	04012(ErbB signaling pathway);04370(VEGF signaling pathway);04510(Focal adhesion);04810(Regulation of actin cytoskeleton);04810(Regulation of actin cytoskeleton)	K05725	EC:2.7.10.2	protein tyrosine kinase 2ab [Source:ZFIN;Acc:ZDB-GENE-020114-1]		4.21818	4.99596	2.11415	7.62851	2.36406	4.80721	2.53398	2.66785	2.35997	3.45782	3.35259	2.66736
ENSDARG00000004680	dnajb6a	ENSDART00000185119;ENSDART00000019417	GO:0005575(cellular_component);GO:0007519(skeletal muscle tissue development);GO:0007626(locomotory behavior);GO:0007626(locomotory behavior)		K09512		DnaJ heat shock protein family (Hsp40) member B6a [Source:ZFIN;Acc:ZDB-GENE-040718-45]		17.3942	24.1625	29.7276	26.1072	14.6467	17.8318	11.282	15.8258	10.3585	14.6108	12.4701	10.9165
ENSDARG00000004687	acaa1	ENSDART00000007997	GO:0003824(catalytic activity);GO:0003988(acetyl-CoA C-acyltransferase activity);GO:0005777(peroxisome);GO:0006635(fatty acid beta-oxidation);GO:0010124(phenylacetate catabolic process);GO:0016740(transferase activity);GO:0016746(transferase activity, transferring acyl groups);GO:0016747(transferase activity, transferring acyl groups other than amino-acyl groups)	00071(Fatty acid degradation);00280(Valine, leucine and isoleucine degradation);00592(alpha-Linolenic acid metabolism);01040(Biosynthesis of unsaturated fatty acids);03320(PPAR signaling pathway);04146(Peroxisome)	K07513	EC:2.3.1.16	acetyl-CoA acyltransferase 1 [Source:ZFIN;Acc:ZDB-GENE-040704-48]		54.8317	12.1962	2.39379	8.37716	8.17997	11.2306	19.3512	106.749	6.50741	15.68	10.7709	9.81199		23.1406	9.26259	44.2026	12.0876
ENSDARG00000004692	nabp1a	ENSDART00000007914;ENSDART00000135356;ENSDART00000147286					nucleic acid binding protein 1a [Source:ZFIN;Acc:ZDB-GENE-041212-71]		12.6494	15.9275	7.25945	30.6136	12.0828	10.5722	4.67282	6.5627	5.19756	14.1705	17.0109	6.67306
ENSDARG00000004695	six4a	ENSDART00000143903;ENSDART00000135381	GO:0000976(transcription regulatory region sequence-specific DNA binding);GO:0000981(DNA-binding transcription factor activity, RNA polymerase II-specific);GO:0003677(DNA binding);GO:0005634(nucleus);GO:0005667(transcription factor complex);GO:0006355(regulation of transcription, DNA-templated);GO:0006357(regulation of transcription by RNA polymerase II);GO:0043565(sequence-specific DNA binding);…		K15615		SIX homeobox 4a [Source:ZFIN;Acc:ZDB-GENE-010201-2]		0.684595	1.22179	11.4306	0.493972	11.0771	10.5294	5.55707	0.621132	8.67628	0.481539	8.31177	4.64439
ENSDARG00000004696	eefsec	ENSDART00000007783	GO:0001514(selenocysteine incorporation);GO:0003746(translation elongation factor activity);GO:0003924(GTPase activity);GO:0005525(GTP binding);GO:0006414(translational elongation)		K03833		eukaryotic elongation factor, selenocysteine-tRNA-specific [Source:ZFIN;Acc:ZDB-GENE-051120-72]		6.4586	8.27105	6.42596	8.54856	5.50903	3.57228	3.96859	7.03345	1.6169	3.02677	4.82438	2.85838
ENSDARG00000004697	rxrgb	ENSDART00000002554;ENSDART00000170930	GO:0003677(DNA binding);GO:0003700(DNA-binding transcription factor activity);GO:0003707(steroid hormone receptor activity);GO:0005634(nucleus);GO:0006355(regulation of transcription, DNA-templated);GO:0008270(zinc ion binding);GO:0043401(steroid hormone mediated signaling pathway);GO:0043565(sequence-specific DNA binding);GO:0046872(metal ion binding);GO:0046872(metal ion binding)	03320(PPAR signaling pathway);04920(Adipocytokine signaling pathway);04920(Adipocytokine signaling pathway)	K08526		retinoid X receptor, gamma b [Source:ZFIN;Acc:ZDB-GENE-040718-34]		7.52549	2.85443	8.34849	0.928265	5.33322	2.73687	4.57895	10.6376	3.60145	2.72469	2.81144	3.70986
ENSDARG00000004702	irf2bp2a	ENSDART00000136991			K22383		interferon regulatory factor 2 binding protein 2a [Source:ZFIN;Acc:ZDB-GENE-030131-7809]		10.8647	21.201	20.1251	22.8443	14.9178	22.3494	17.0334	14.8556	14.9648	4.9037	18.6991	19.9205
ENSDARG00000004706	syf2	ENSDART00000099950;ENSDART00000145016;ENSDART00000146278	GO:0000398(mRNA splicing, via spliceosome);GO:0000974(Prp19 complex);GO:0003674(molecular_function);GO:0005634(nucleus);GO:0005681(spliceosomal complex);GO:0006397(mRNA processing);GO:0008380(RNA splicing);GO:0071007(U2-type catalytic step 2 spliceosome);GO:0071013(catalytic step 2 spliceosome);GO:0071014(post-mRNA release spliceosomal complex);GO:0071014(post-mRNA release spliceosomal complex)	03040(Spliceosome);03040(Spliceosome)	K12868		SYF2 pre-mRNA-splicing factor [Source:ZFIN;Acc:ZDB-GENE-040801-170]		16.4571	19.3132	33.1145	29.0799	24.5161	24.761	15.0599	23.657	12.7035	13.2268	18.279	12.5473
ENSDARG00000004712	tbr1b	ENSDART00000006612	GO:0003677(DNA binding);GO:0003700(DNA-binding transcription factor activity);GO:0005634(nucleus);GO:0006355(regulation of transcription, DNA-templated)		K10174		T-box, brain, 1b [Source:ZFIN;Acc:ZDB-GENE-000323-1]		0.05693	0.495286	0.044715	0.593674	0	0	0.048408	0.08901	0	0.055707	0	0
ENSDARG00000004713	mad2l1	ENSDART00000028017	GO:0007094(mitotic spindle assembly checkpoint)	04110(Cell cycle);04114(Oocyte meiosis);04914(Progesterone-mediated oocyte maturation)	K02537		MAD2 mitotic arrest deficient-like 1 (yeast) [Source:ZFIN;Acc:ZDB-GENE-030515-3]		54.289	101.146	17.372	131.869	1.66676	4.16438	11.0183	24.1074	1.14902	59.947	6.97915	4.6361
ENSDARG00000004714	tcf12	ENSDART00000009938;ENSDART00000174218;ENSDART00000174292;ENSDART00000174335;ENSDART00000161387;ENSDART00000174117;ENSDART00000174355;ENSDART00000131282;ENSDART00000174049;ENSDART00000140338;ENSDART00000136745	GO:0000790(nuclear chromatin);GO:0000978(RNA polymerase II proximal promoter sequence-specific DNA binding);GO:0003700(DNA-binding transcription factor activity);GO:0005634(nucleus);GO:0005667(transcription factor complex);GO:0042803(protein homodimerization activity);GO:0043425(bHLH transcription factor binding);GO:0045666(positive regulation of neuron differentiation);GO:0045944(positive regula…		K15603		transcription factor 12 [Source:ZFIN;Acc:ZDB-GENE-040516-11]		2.26901	1.51579	4.79461	0.476915	4.47363	6.8595	4.10288	2.43294	3.92309	0.881904	3.73122	5.46763
ENSDARG00000004721	mpp5b	ENSDART00000028084	GO:0005515(protein binding)				membrane protein, palmitoylated 5b (MAGUK p55 subfamily member 5) [Source:ZFIN;Acc:ZDB-GENE-060531-2]		0.266152	0.527376	0.179694	1.98942	0	0	0.320443	0.463515	0	0.244911	0.086976	0.009569
ENSDARG00000004724	tcea3	ENSDART00000134037;ENSDART00000006061;ENSDART00000140552	GO:0003676(nucleic acid binding);GO:0003746(translation elongation factor activity);GO:0005634(nucleus);GO:0006351(transcription, DNA-templated);GO:0006355(regulation of transcription, DNA-templated);GO:0006414(translational elongation);GO:0008270(zinc ion binding);GO:0046872(metal ion binding);GO:0046872(metal ion binding)				transcription elongation factor A (SII), 3 [Source:ZFIN;Acc:ZDB-GENE-040426-1860]		11.3037	10.4075	20.2928	5.81455	22.0064	28.5239	19.418	26.2838	21.9447	6.76061	21.0979	10.0632
ENSDARG00000004726	trappc11	ENSDART00000054809	GO:0001889(liver development);GO:0005794(Golgi apparatus);GO:0006487(protein N-linked glycosylation);GO:0007030(Golgi organization);GO:0009306(protein secretion);GO:0016192(vesicle-mediated transport);GO:0055088(lipid homeostasis);GO:0060041(retina development in camera-type eye);GO:1905897(regulation of response to endoplasmic reticulum stress)		K20308		trafficking protein particle complex 11 [Source:ZFIN;Acc:ZDB-GENE-030131-1723]		10.802	12.1701	6.90346	17.7672	7.05251	8.17903	5.42712	6.45047	4.50055	8.52039	7.00969	5.31034
ENSDARG00000004735	hnrnpub	ENSDART00000122696;ENSDART00000006954	GO:0005515(protein binding);GO:0005634(nucleus);GO:0005634(nucleus)	03040(Spliceosome);03040(Spliceosome)	K12888		heterogeneous nuclear ribonucleoprotein Ub [Source:ZFIN;Acc:ZDB-GENE-030131-6422]		38.0626	63.9353	35.2651	101.085	28.3884	26.0986	17.6661	23.2485	12.3832	41.793	24.8895	21.8828
ENSDARG00000004745	lmbr1l	ENSDART00000027224;ENSDART00000134008	GO:0005886(plasma membrane);GO:0006897(endocytosis);GO:0016020(membrane);GO:0016021(integral component of membrane);GO:0016021(integral component of membrane)				limb development membrane protein 1-like [Source:ZFIN;Acc:ZDB-GENE-030131-9906]		5.67031	3.73009	2.30924	4.96367	9.44445	2.41667	4.50046	10.4742	1.85947	6.39764	1.97895	3.60623
ENSDARG00000004748	zgc:100868	ENSDART00000161644	GO:0004252(serine-type endopeptidase activity);GO:0005509(calcium ion binding);GO:0005575(cellular_component);GO:0006508(proteolysis);GO:0007596(blood coagulation);GO:0008233(peptidase activity);GO:0008236(serine-type peptidase activity);GO:0016787(hydrolase activity);GO:0019897(extrinsic component of plasma membrane);GO:0046658(anchored component of plasma membrane)				zgc:100868 [Source:ZFIN;Acc:ZDB-GENE-040801-33]		3.07415	10.1132	54.2511	1.39029	37.5618	29.2022	4.43281	4.20399	8.04779	2.1957	69.3318	18.9966
ENSDARG00000004753	mylkb	ENSDART00000027684;ENSDART00000172318	GO:0004672(protein kinase activity);GO:0005515(protein binding);GO:0005524(ATP binding);GO:0005575(cellular_component);GO:0005865(striated muscle thin filament);GO:0006468(protein phosphorylation);GO:0006936(muscle contraction);GO:0008307(structural constituent of muscle);GO:0016301(kinase activity);GO:0016310(phosphorylation);GO:0030017(sarcomere);GO:0030018(Z disc);GO:0030240(skeletal muscle th…	04020(Calcium signaling pathway);04270(Vascular smooth muscle contraction);04371(Apelin signaling pathway);04510(Focal adhesion);04810(Regulation of actin cytoskeleton);04810(Regulation of actin cytoskeleton)	K00907	EC:2.7.11.18	myosin light chain kinase b [Source:ZFIN;Acc:ZDB-GENE-041111-150]		0.202032	0.144334	0.0651398	0.0890681	0	0.0181957	0.959148	1.47526	0	0.160324	0.0800705	0.0183081
ENSDARG00000004754	hspa4a	ENSDART00000021037;ENSDART00000148630	GO:0000166(nucleotide binding);GO:0005524(ATP binding);GO:0005634(nucleus);GO:0005829(cytosol);GO:0005829(cytosol)	04530(Tight junction);04530(Tight junction)	K09489		heat shock protein 4a [Source:ZFIN;Acc:ZDB-GENE-040426-2832]		25.4614	61.7005	22.5591	76.6233	13.4617	10.5841	8.75561	11.5991	8.56989	28.4055	18.1819	23.67
ENSDARG00000004757	ybx1	ENSDART00000024320;ENSDART00000163922;ENSDART00000110512;ENSDART00000128057;ENSDART00000126513	GO:0003676(nucleic acid binding);GO:0003723(RNA binding);GO:0005634(nucleus);GO:0008190(eukaryotic initiation factor 4E binding);GO:0045947(negative regulation of translational initiation);GO:0048025(negative regulation of mRNA splicing, via spliceosome);GO:0050686(negative regulation of mRNA processing);GO:0051236(establishment of RNA localization);GO:1900364(negative regulation of mRNA polyaden…		K09276		Y box binding protein 1 [Source:ZFIN;Acc:ZDB-GENE-000629-3]		586.3	330.09	1271.12	178.04	1833.33	1404.48	1158.32	658.556	1330.7	265.706	1297.97	1388.78
ENSDARG00000004763	hhla2a	ENSDART00000006284	GO:0016020(membrane);GO:0016021(integral component of membrane)				HERV-H LTR-associating 2a, tandem duplicate 2 [Source:ZFIN;Acc:ZDB-GENE-091204-324]		0.080395	0.341958	1.23186	0	0.507746	1.37445	0	0.128369	0.181866	0	5.15416	2.04749
ENSDARG00000004771	ankrd10b	ENSDART00000102562;ENSDART00000144712;ENSDART00000148302;ENSDART00000138836;ENSDART00000138056	GO:0003674(molecular_function);GO:0005515(protein binding);GO:0005575(cellular_component);GO:0005575(cellular_component)				ankyrin repeat domain 10b [Source:ZFIN;Acc:ZDB-GENE-061013-49]		7.13164	2.52992	3.38522	3.75357	9.29722	13.7267	6.09427	10.8684	5.67522	2.1337	10.89	5.04761
ENSDARG00000004774	wdr36	ENSDART00000014049	GO:0005515(protein binding);GO:0005730(nucleolus);GO:0005737(cytoplasm);GO:0006364(rRNA processing);GO:0032040(small-subunit processome);GO:0034388(Pwp2p-containing subcomplex of 90S preribosome)	03008(Ribosome biogenesis in eukaryotes)	K14554		WD repeat domain 36 [Source:ZFIN;Acc:ZDB-GENE-030131-464]		12.1811	21.2101	5.2248	32.4629	2.65607	4.3691	3.22073	7.21497	2.20839	14.8732	3.28983	3.27978
ENSDARG00000004782	fgfr3	ENSDART00000013534	GO:0000166(nucleotide binding);GO:0004672(protein kinase activity);GO:0004713(protein tyrosine kinase activity);GO:0004714(transmembrane receptor protein tyrosine kinase activity);GO:0005007(fibroblast growth factor-activated receptor activity);GO:0005524(ATP binding);GO:0006468(protein phosphorylation);GO:0008284(positive regulation of cell population proliferation);GO:0008543(fibroblast growth …	04010(MAPK signaling pathway);04144(Endocytosis);04810(Regulation of actin cytoskeleton)	K05094	EC:2.7.10.1	fibroblast growth factor receptor 3 [Source:ZFIN;Acc:ZDB-GENE-000816-1]		1.1796	0.38064	0.933573	0.157687	2.30711	4.20169	2.38547	2.05298	1.98001	0.275874	3.38995	2.3159
ENSDARG00000004785	cops2	ENSDART00000006124;ENSDART00000133872	GO:0003714(transcription corepressor activity);GO:0005515(protein binding);GO:0005634(nucleus);GO:0005737(cytoplasm);GO:0008180(COP9 signalosome);GO:0045892(negative regulation of transcription, DNA-templated);GO:1903507(negative regulation of nucleic acid-templated transcription);GO:1903507(negative regulation of nucleic acid-templated transcription)		K12176		COP9 signalosome subunit 2 [Source:ZFIN;Acc:ZDB-GENE-040625-15]		22.7909	31.0692	30.0508	22.2739	20.9098	23.6517	23.106	36.3877	15.6034	19.0296	22.066	16.4951
ENSDARG00000004789	lrp1ba	ENSDART00000180379;ENSDART00000133385	GO:0005509(calcium ion binding);GO:0005515(protein binding);GO:0016020(membrane);GO:0016021(integral component of membrane);GO:0016021(integral component of membrane)				low density lipoprotein receptor-related protein 1Ba [Source:ZFIN;Acc:ZDB-GENE-050208-608]		0.054522	0.0564426	0.0804986	0.0909111	0.02622	0.0319454	0.03832	0.0185832	0	0.15875	0	0.0322831
ENSDARG00000004794	ccdc146	ENSDART00000017947;ENSDART00000135451	GO:0003674(molecular_function);GO:0005575(cellular_component);GO:0008150(biological_process);GO:0008150(biological_process)				coiled-coil domain containing 146 [Source:ZFIN;Acc:ZDB-GENE-041210-217]		0.96168	0.990674	0.594967	3.48623	0.653928	0.275206	2.60934	7.72022	0.233571	1.44247	0.444845	0.196132
ENSDARG00000004796	mgrn1b	ENSDART00000008988;ENSDART00000078221		04120(Ubiquitin mediated proteolysis);04120(Ubiquitin mediated proteolysis)	K10604	EC:2.3.2.27	mahogunin, ring finger 1b [Source:ZFIN;Acc:ZDB-GENE-110401-3]		2.40275	3.29942	2.38019	3.07373	1.83629	4.68295	1.81092	2.98615	1.14796	3.33637	2.59057	1.35758
ENSDARG00000004806	grwd1	ENSDART00000121998	GO:0003674(molecular_function);GO:0005515(protein binding);GO:0005634(nucleus);GO:0008150(biological_process)		K14848		glutamate-rich WD repeat containing 1 [Source:ZFIN;Acc:ZDB-GENE-030131-9844]		19.1624	34.9982	10.4805	53.5107	6.58525	6.51946	5.73503	8.26325	3.74834	23.6081	6.16865	4.8227
ENSDARG00000004823	asz1	ENSDART00000005145	GO:0005515(protein binding);GO:0016020(membrane);GO:0016021(integral component of membrane);GO:0034587(piRNA metabolic process);GO:0071546(pi-body)		K18410		ankyrin repeat, SAM and basic leucine zipper domain containing 1 [Source:ZFIN;Acc:ZDB-GENE-040426-988]		21.4564	42.1198	3.17037	68.7404	0.070642	0.288115	1.64872	6.97399	0.453506	27.5592	1.44384	0.076018
ENSDARG00000004830	flot2a	ENSDART00000003947;ENSDART00000148852;ENSDART00000149413	GO:0003674(molecular_function);GO:0005768(endosome);GO:0007155(cell adhesion);GO:0016020(membrane);GO:0030139(endocytic vesicle);GO:1904086(regulation of epiboly involved in gastrulation with mouth forming second);GO:2000047(regulation of cell-cell adhesion mediated by cadherin);GO:2000047(regulation of cell-cell adhesion mediated by cadherin)	04910(Insulin signaling pathway);04910(Insulin signaling pathway)	K07192		flotillin 2a [Source:ZFIN;Acc:ZDB-GENE-020430-3]		7.25479	5.45231	9.78936	2.87266	11.3825	12.3174	9.44473	13.6521	6.77207	2.47118	8.84049	8.85801
ENSDARG00000004836	dnajc5ab	ENSDART00000187181;ENSDART00000148423	GO:0005575(cellular_component);GO:0005575(cellular_component)				DnaJ (Hsp40) homolog, subfamily C, member 5ab [Source:ZFIN;Acc:ZDB-GENE-081021-2]		2.84231	3.40055	2.9593	3.69195	3.76978	3.83123	2.55123	4.15894	1.74594	2.36636	3.80767	2.55315
ENSDARG00000004840	rassf1	ENSDART00000142265;ENSDART00000038465;ENSDART00000145459	GO:0005515(protein binding);GO:0007165(signal transduction);GO:0035556(intracellular signal transduction);GO:0046872(metal ion binding);GO:0070507(regulation of microtubule cytoskeleton organization);GO:0070507(regulation of microtubule cytoskeleton organization)				Ras association (RalGDS/AF-6) domain family 1 [Source:ZFIN;Acc:ZDB-GENE-040912-14]		6.22795	15.4611	13.4917	6.32969	3.06331	2.35336	4.87588	7.50591	1.98712	2.10887	2.43139	2.23671
ENSDARG00000004843	foxp1a	ENSDART00000189721;ENSDART00000129022;ENSDART00000104985;ENSDART00000177571;ENSDART00000136509;ENSDART00000146526	GO:0003677(DNA binding);GO:0003700(DNA-binding transcription factor activity);GO:0005634(nucleus);GO:0006355(regulation of transcription, DNA-templated);GO:0043565(sequence-specific DNA binding);GO:0043565(sequence-specific DNA binding)		K09409		forkhead box P1a [Source:ZFIN;Acc:ZDB-GENE-060929-624]		6.45386	8.25616	7.77988	13.1212	4.5955	2.90294	4.45692	7.4037	2.17973	6.68864	3.08659	1.88587
ENSDARG00000004851	hinfp	ENSDART00000124487;ENSDART00000051414;ENSDART00000188375	GO:0003676(nucleic acid binding);GO:0003676(nucleic acid binding)				histone H4 transcription factor [Source:ZFIN;Acc:ZDB-GENE-040426-2764]		4.25977	7.0146	1.52387	9.14785	1.48402	1.13516	1.3683	3.04366	0.972826	3.9217	1.25428	1.21438
ENSDARG00000004861	esrrga	ENSDART00000009104;ENSDART00000166976	GO:0003677(DNA binding);GO:0003700(DNA-binding transcription factor activity);GO:0003707(steroid hormone receptor activity);GO:0005496(steroid binding);GO:0005634(nucleus);GO:0006351(transcription, DNA-templated);GO:0006355(regulation of transcription, DNA-templated);GO:0008270(zinc ion binding);GO:0043401(steroid hormone mediated signaling pathway);GO:0043565(sequence-specific DNA binding);GO:00…		K08554		estrogen-related receptor gamma a [Source:ZFIN;Acc:ZDB-GENE-030821-2]		0.201635	0.185699	0	1.04228	0.076562	0.129312	0.082539	0.174476	0	0.15304	0.084596	0.223721
ENSDARG00000004864	zgc:171734	ENSDART00000019561	GO:0003677(DNA binding);GO:0003700(DNA-binding transcription factor activity);GO:0005634(nucleus);GO:0006355(regulation of transcription, DNA-templated);GO:0043565(sequence-specific DNA binding)				zgc:171734 [Source:ZFIN;Acc:ZDB-GENE-070928-26]		16.1849	27.2298	2.36113	42.969	0.427255	0.842351	0.161777	0.265912	0.223578	22.0681	0.88832	0.46817
ENSDARG00000004866	mindy1	ENSDART00000147491;ENSDART00000136502	GO:0000978(RNA polymerase II proximal promoter sequence-specific DNA binding);GO:0003700(DNA-binding transcription factor activity);GO:0004843(thiol-dependent ubiquitin-specific protease activity);GO:0005634(nucleus);GO:0005829(cytosol);GO:0006357(regulation of transcription by RNA polymerase II);GO:0006508(proteolysis);GO:0008233(peptidase activity);GO:0008234(cysteine-type peptidase activity);G…		K01309	EC:3.4.19.12	MINDY lysine 48 deubiquitinase 1 [Source:ZFIN;Acc:ZDB-GENE-070717-2]		10.4578	28.1233	64.9157	22.1468	11.9339	8.40588	5.32791	9.00926	5.89832	9.94585	7.60966	3.84191
ENSDARG00000004869	penka	ENSDART00000142013	GO:0005886(plasma membrane);GO:0007218(neuropeptide signaling pathway);GO:0007268(chemical synaptic transmission);GO:0030425(dendrite);GO:0031628(opioid receptor binding);GO:0043025(neuronal cell body);GO:0043679(axon terminus)	04080(Neuroactive ligand-receptor interaction)	K18832		proenkephalin a [Source:ZFIN;Acc:ZDB-GENE-030729-31]		0.984904	0.56904	0.361103	0.170632	0	0.136112	3.70342	6.10654	0.181357	0.310534	0.327411	0.445862
ENSDARG00000004870	psen1	ENSDART00000166687;ENSDART00000149864;ENSDART00000185749;ENSDART00000150089	GO:0000139(Golgi membrane);GO:0004190(aspartic-type endopeptidase activity);GO:0005783(endoplasmic reticulum);GO:0005789(endoplasmic reticulum membrane);GO:0005794(Golgi apparatus);GO:0006508(proteolysis);GO:0007219(Notch signaling pathway);GO:0008233(peptidase activity);GO:0016020(membrane);GO:0016021(integral component of membrane);GO:0016485(protein processing);GO:0016787(hydrolase activity);G…	04310(Wnt signaling pathway);04330(Notch signaling pathway);04330(Notch signaling pathway)	K04505	EC:3.4.23.-	presenilin 1 [Source:ZFIN;Acc:ZDB-GENE-991119-4]		10.5635	14.6994	10.9691	16.0219	7.58006	7.62602	7.31857	13.01	3.966	8.57829	8.67605	7.70873
ENSDARG00000004871	mst1rb	ENSDART00000014018	GO:0000166(nucleotide binding);GO:0004672(protein kinase activity);GO:0004713(protein tyrosine kinase activity);GO:0004714(transmembrane receptor protein tyrosine kinase activity);GO:0005515(protein binding);GO:0005524(ATP binding);GO:0005887(integral component of plasma membrane);GO:0006468(protein phosphorylation);GO:0007169(transmembrane receptor protein tyrosine kinase signaling pathway);GO:0…		K05100	EC:2.7.10.1	macrophage stimulating 1 receptor b [Source:ZFIN;Acc:ZDB-GENE-071218-3]		0.0741551	0.0760844	0.347404	0	0.585591	0.184536	0.221214	0.1416	0.107327	0.0676808	0.411374	0.143447
ENSDARG00000004874	spata6l	ENSDART00000163581;ENSDART00000161061;ENSDART00000169563;ENSDART00000008421;ENSDART00000167046;ENSDART00000157585;ENSDART00000167136;ENSDART00000166055	GO:0003674(molecular_function);GO:0005575(cellular_component);GO:0008150(biological_process);GO:0008150(biological_process)				spermatogenesis associated 6-like [Source:ZFIN;Acc:ZDB-GENE-040426-1369]		4.97977	12.6101	2.80574	19.0876	1.26424	1.74526	3.2961	6.91256	1.04445	10.9986	0.6433	0.0456937
ENSDARG00000004875	tmc6b	ENSDART00000167828;ENSDART00000173150	GO:0003674(molecular_function);GO:0005216(ion channel activity);GO:0005887(integral component of plasma membrane);GO:0008150(biological_process);GO:0008381(mechanosensitive ion channel activity);GO:0016020(membrane);GO:0016021(integral component of membrane);GO:0034220(ion transmembrane transport);GO:0055085(transmembrane transport);GO:0055085(transmembrane transport)				transmembrane channel-like 6b [Source:ZFIN;Acc:ZDB-GENE-040718-460]		12.0545	12.6956	25.9951	15.8354	14.1298	22.7556	16.3665	15.2055	11.1064	10.9352	17.0303	9.88891
ENSDARG00000004877	rock2b	ENSDART00000166573;ENSDART00000164401;ENSDART00000157427;ENSDART00000152839;ENSDART00000153420;ENSDART00000147168	GO:0000166(nucleotide binding);GO:0004672(protein kinase activity);GO:0004674(protein serine/threonine kinase activity);GO:0005524(ATP binding);GO:0005856(cytoskeleton);GO:0006468(protein phosphorylation);GO:0006939(smooth muscle contraction);GO:0007266(Rho protein signal transduction);GO:0010825(positive regulation of centrosome duplication);GO:0016020(membrane);GO:0016021(integral component of …	04270(Vascular smooth muscle contraction);04350(TGF-beta signaling pathway);04510(Focal adhesion);04530(Tight junction);04810(Regulation of actin cytoskeleton);05132(Salmonella infection);05132(Salmonella infection)	K04514	EC:2.7.11.1	rho-associated, coiled-coil containing protein kinase 2b [Source:ZFIN;Acc:ZDB-GENE-060125-2]		8.03709	16.0905	17.9202	11.6139	9.95685	11.0317	4.08183	16.8754	4.03197	8.65783	7.70889	8.61733
ENSDARG00000004880	acsm3	ENSDART00000041806	GO:0003824(catalytic activity);GO:0003996(acyl-CoA ligase activity);GO:0004321(fatty-acyl-CoA synthase activity);GO:0005759(mitochondrial matrix);GO:0006633(fatty acid biosynthetic process);GO:0006637(acyl-CoA metabolic process);GO:0015645(fatty acid ligase activity)	00650(Butanoate metabolism)	K01896	EC:6.2.1.2	acyl-CoA synthetase medium chain family member 3 [Source:ZFIN;Acc:ZDB-GENE-080220-22]		0.628434	0.097554	0.255537	0.187208	0.126237	0.741241	0.965448	2.22204	0.34464	0.140717	0.466443	0.213568
ENSDARG00000004889	aga	ENSDART00000016728;ENSDART00000173350	GO:0003948(N4-(beta-N-acetylglucosaminyl)-L-asparaginase activity);GO:0005737(cytoplasm);GO:0005764(lysosome);GO:0006517(protein deglycosylation);GO:0016787(hydrolase activity);GO:0051604(protein maturation);GO:0051604(protein maturation)	00511(Other glycan degradation);04142(Lysosome);04142(Lysosome)	K01444	EC:3.5.1.26	aspartylglucosaminidase [Source:ZFIN;Acc:ZDB-GENE-040426-2311]		11.3725	12.1535	16.5073	16.2524	7.82394	9.89234	6.13668	9.88044	3.91655	9.74542	9.61451	6.55602
ENSDARG00000004891	pex19	ENSDART00000020135;ENSDART00000045016;ENSDART00000142940;ENSDART00000146409	GO:0005777(peroxisome);GO:0016020(membrane);GO:0016021(integral component of membrane);GO:0016021(integral component of membrane)	04146(Peroxisome);04146(Peroxisome)	K13337		peroxisomal biogenesis factor 19 [Source:ZFIN;Acc:ZDB-GENE-050417-424]		21.0107	25.0818	18.9056	20.9804	21.2933	18.1988	17.0671	16.679	16.761	14.8808	15.3423	15.5028
ENSDARG00000004898	zp2l2	ENSDART00000065475					zona pellucida glycoprotein 2, like 2 [Source:ZFIN;Acc:ZDB-GENE-060818-4]		35.6756	29.7369	4.90216	116.096	0	0.832029	0.447795	1.09795	0.571174	53.5043	1.51501	0.236666
ENSDARG00000004904	gys2	ENSDART00000165289;ENSDART00000185839;ENSDART00000014007	GO:0004373(glycogen (starch) synthase activity);GO:0005737(cytoplasm);GO:0005829(cytosol);GO:0005856(cytoskeleton);GO:0005938(cell cortex);GO:0005978(glycogen biosynthetic process);GO:0009749(response to glucose);GO:0016740(transferase activity);GO:0016757(transferase activity, transferring glycosyl groups);GO:0030864(cortical actin cytoskeleton);GO:0043265(ectoplasm);GO:0043265(ectoplasm)	00500(Starch and sucrose metabolism);04910(Insulin signaling pathway);04910(Insulin signaling pathway)	K00693	EC:2.4.1.11	glycogen synthase 2 [Source:ZFIN;Acc:ZDB-GENE-030826-31]		40.4968	12.7665	1.08423	10.0841	0.462492	0.250328	1.30403	38.492	0.103161	9.23383	0.425262	0.336723
ENSDARG00000004906	stip1	ENSDART00000112488;ENSDART00000149379;ENSDART00000041441	GO:0005515(protein binding);GO:0008150(biological_process);GO:0051879(Hsp90 protein binding);GO:0051879(Hsp90 protein binding)		K09553		stress-induced phosphoprotein 1 [Source:ZFIN;Acc:ZDB-GENE-041121-17]		36.9182	51.5578	19.8484	82.1098	12.7308	16.0108	12.0309	15.5648	10.5079	37.5942	16.6897	16.5352
ENSDARG00000004925	immp2l	ENSDART00000010706;ENSDART00000141481	GO:0005739(mitochondrion);GO:0005743(mitochondrial inner membrane);GO:0006465(signal peptide processing);GO:0006508(proteolysis);GO:0006627(protein processing involved in protein targeting to mitochondrion);GO:0008233(peptidase activity);GO:0008236(serine-type peptidase activity);GO:0016020(membrane);GO:0016021(integral component of membrane);GO:0016787(hydrolase activity);GO:0033108(mitochondria…	03060(Protein export);03060(Protein export)	K09648	EC:3.4.21.-	inner mitochondrial membrane peptidase subunit 2 [Source:ZFIN;Acc:ZDB-GENE-040808-9]		1.91451	4.11095	2.06137	5.46333	1.3049	1.35149	1.08987	1.71047	1.45666	2.53647	1.02586	1.06785
ENSDARG00000004930	lmo7a	ENSDART00000009920;ENSDART00000143305;ENSDART00000134768;ENSDART00000139614;ENSDART00000145576;ENSDART00000090782;ENSDART00000135395;ENSDART00000144843;ENSDART00000146528;ENSDART00000136534;ENSDART00000136349;ENSDART00000145085;ENSDART00000134084	GO:0005515(protein binding);GO:0023051(regulation of signaling);GO:0030155(regulation of cell adhesion);GO:0046872(metal ion binding);GO:0046872(metal ion binding)	04520(Adherens junction);04520(Adherens junction)	K06084		LIM domain 7a [Source:ZFIN;Acc:ZDB-GENE-030219-74]		9.17636	18.1667	83.9291	1.32101	70.6638	37.071	24.1394	15.4971	28.8875	3.14376	46.4803	24.9607
ENSDARG00000004931	slc8a3	ENSDART00000100204	GO:0005432(calcium:sodium antiporter activity);GO:0006816(calcium ion transport);GO:0007154(cell communication);GO:0016020(membrane);GO:0016021(integral component of membrane);GO:0035725(sodium ion transmembrane transport);GO:0055085(transmembrane transport)	04020(Calcium signaling pathway);04371(Apelin signaling pathway)	K05849		solute carrier family 8 (sodium/calcium exchanger), member 3 [Source:ZFIN;Acc:ZDB-GENE-050810-1]		0.024837	0.0549	0.266362	0.060781	0.187231	0.421235	0.202963	0.080483	0.312373	0.038193	0.173771	0.130854
ENSDARG00000004932	anos1b	ENSDART00000144318;ENSDART00000003736	GO:0005515(protein binding);GO:0005576(extracellular region);GO:0010466(negative regulation of peptidase activity);GO:0030414(peptidase inhibitor activity);GO:0030414(peptidase inhibitor activity)				anosmin 1b [Source:ZFIN;Acc:ZDB-GENE-000201-13]		0.202458	0.139356	0.550676	0.232056	0.28728	1.77633	1.41605	1.36516	0.516057	0.115385	0.351967	1.59554
ENSDARG00000004937	skp2	ENSDART00000101751;ENSDART00000134320;ENSDART00000140520;ENSDART00000136904;ENSDART00000131624	GO:0000086(G2/M transition of mitotic cell cycle);GO:0005515(protein binding);GO:0005634(nucleus);GO:0005829(cytosol);GO:0016567(protein ubiquitination);GO:0019005(SCF ubiquitin ligase complex);GO:0031146(SCF-dependent proteasomal ubiquitin-dependent protein catabolic process);GO:0051726(regulation of cell cycle);GO:0061630(ubiquitin protein ligase activity);GO:0061630(ubiquitin protein ligase ac…	04068(FoxO signaling pathway);04110(Cell cycle);04120(Ubiquitin mediated proteolysis);04150(mTOR signaling pathway);04150(mTOR signaling pathway)	K03875		S-phase kinase-associated protein 2, E3 ubiquitin protein ligase [Source:ZFIN;Acc:ZDB-GENE-030219-158]		9.72485	17.7012	3.3942	33.6331	0.548316	1.59378	1.23519	2.90431	0.802195	14.2238	1.51756	0.85372
ENSDARG00000004939	mtdhb	ENSDART00000015170;ENSDART00000075937	GO:0016020(membrane);GO:0016021(integral component of membrane);GO:0043066(negative regulation of apoptotic process);GO:0043123(positive regulation of I-kappaB kinase/NF-kappaB signaling);GO:0045766(positive regulation of angiogenesis);GO:0045766(positive regulation of angiogenesis)				metadherin b [Source:ZFIN;Acc:ZDB-GENE-090929-2]		6.86729	3.71856	3.23436	3.51208	2.48827	4.6999	6.81286	1.98312	3.48561	2.3761	1.76562	4.57764
ENSDARG00000004948	bccip	ENSDART00000016635			K15262		BRCA2 and CDKN1A interacting protein [Source:ZFIN;Acc:ZDB-GENE-050320-39]		15.8633	12.1354	12.0838	14.6296	5.73748	6.85215	8.66815	13.126	4.8464	7.54131	7.48709	5.26169
ENSDARG00000004952	rsad2	ENSDART00000019617	GO:0002376(immune system process);GO:0003824(catalytic activity);GO:0005783(endoplasmic reticulum);GO:0005789(endoplasmic reticulum membrane);GO:0009615(response to virus);GO:0016020(membrane);GO:0045087(innate immune response);GO:0046872(metal ion binding);GO:0051536(iron-sulfur cluster binding);GO:0051539(4 iron, 4 sulfur cluster binding);GO:0051607(defense response to virus)				radical S-adenosyl methionine domain containing 2 [Source:ZFIN;Acc:ZDB-GENE-050913-129]		4.36533	2.17686	3.69965	0.172865	19.492	19.3547	22.3967	4.95197	4.1725	2.31192	57.8918	10.606
ENSDARG00000004953	mxb	ENSDART00000012627;ENSDART00000009315;ENSDART00000110696;ENSDART00000131454	GO:0000166(nucleotide binding);GO:0003924(GTPase activity);GO:0005525(GTP binding);GO:0005525(GTP binding)				myxovirus (influenza) resistance B [Source:ZFIN;Acc:ZDB-GENE-030721-6]		0.665542	1.58257	3.51338	0.0578615	5.89621	6.82191	6.21018	1.57022	1.30277	0.209604	33.5986	14.9349
ENSDARG00000004954	grna	ENSDART00000137973;ENSDART00000147732;ENSDART00000103523;ENSDART00000151083;ENSDART00000151525;ENSDART00000151275;ENSDART00000151655;ENSDART00000151814	GO:0001889(liver development);GO:0005886(plasma membrane);GO:0048675(axon extension);GO:0071340(skeletal muscle acetylcholine-gated channel clustering);GO:0071340(skeletal muscle acetylcholine-gated channel clustering)				granulin a [Source:ZFIN;Acc:ZDB-GENE-030131-8434]		23.1181	4.45795	10.0385	1.45724	32.8046	36.6429	12.5651	22.909	11.8852	4.35089	39.7996	17.9258
ENSDARG00000004956	zmat2	ENSDART00000007412	GO:0000398(mRNA splicing, via spliceosome);GO:0003676(nucleic acid binding);GO:0005681(spliceosomal complex);GO:0008270(zinc ion binding);GO:0046540(U4/U6 x U5 tri-snRNP complex);GO:0046872(metal ion binding)	03040(Spliceosome)	K12848		zinc finger, matrin-type 2 [Source:ZFIN;Acc:ZDB-GENE-030131-3197]		22.7044	26.1249	25.4498	31.7807	23.4331	17.3431	14.8682	22.8852	10.3627	18.4708	19.906	13.6264
ENSDARG00000004964	cyp4t8	ENSDART00000138614;ENSDART00000076955;ENSDART00000131949	GO:0004497(monooxygenase activity);GO:0005506(iron ion binding);GO:0016020(membrane);GO:0016021(integral component of membrane);GO:0016491(oxidoreductase activity);GO:0016705(oxidoreductase activity, acting on paired donors, with incorporation or reduction of molecular oxygen);GO:0020037(heme binding);GO:0046872(metal ion binding);GO:0055114(oxidation-reduction process);GO:0055114(oxidation-reduc…		K07426	EC:1.14.14.1	cytochrome P450, family 4, subfamily T, polypeptide 8 [Source:ZFIN;Acc:ZDB-GENE-031219-3]		18.8226	14.9192	5.60861	0.789714	0.281108	7.20127	7.72513	55.1394	5.27681	9.65161	5.71928	0.238622
ENSDARG00000004979	elovl5	ENSDART00000168595;ENSDART00000172535;ENSDART00000006990;ENSDART00000166456	GO:0005783(endoplasmic reticulum);GO:0005789(endoplasmic reticulum membrane);GO:0005887(integral component of plasma membrane);GO:0006629(lipid metabolic process);GO:0006631(fatty acid metabolic process);GO:0006633(fatty acid biosynthetic process);GO:0006636(unsaturated fatty acid biosynthetic process);GO:0009922(fatty acid elongase activity);GO:0016020(membrane);GO:0016021(integral component of …	00062(Fatty acid elongation);01040(Biosynthesis of unsaturated fatty acids);01040(Biosynthesis of unsaturated fatty acids)	K10244	EC:2.3.1.199	ELOVL fatty acid elongase 5 [Source:ZFIN;Acc:ZDB-GENE-040407-2]		12.002	14.9214	1.72171	0.527243	2.36397	1.83116	0.961642	4.43596	0.875151	4.36921	0.816909	0.379941
ENSDARG00000004988	ppp3ca	ENSDART00000144331;ENSDART00000005929	GO:0004721(phosphoprotein phosphatase activity);GO:0005516(calmodulin binding);GO:0005737(cytoplasm);GO:0005829(cytosol);GO:0005955(calcineurin complex);GO:0006470(protein dephosphorylation);GO:0016787(hydrolase activity);GO:0033173(calcineurin-NFAT signaling cascade);GO:0033192(calmodulin-dependent protein phosphatase activity);GO:0097720(calcineurin-mediated signaling);GO:0097720(calcineurin-me…	04010(MAPK signaling pathway);04020(Calcium signaling pathway);04114(Oocyte meiosis);04218(Cellular senescence);04310(Wnt signaling pathway);04370(VEGF signaling pathway);04625(C-type lectin receptor signaling pathway);04625(C-type lectin receptor signaling pathway)	K04348	EC:3.1.3.16	protein phosphatase 3, catalytic subunit, alpha isozyme [Source:ZFIN;Acc:ZDB-GENE-091113-24]		0.189429	0.162114	0.543094	0.0380302	0.650718	1.01664	0.699118	0.142003	0.879622	0.112506	0.384858	0.694871
ENSDARG00000005002	brf1b	ENSDART00000035827;ENSDART00000181195;ENSDART00000131907	GO:0000126(transcription factor TFIIIB complex);GO:0000995(RNA polymerase III general transcription initiation factor activity);GO:0001006(RNA polymerase III type 3 promoter sequence-specific DNA binding);GO:0002574(thrombocyte differentiation);GO:0005634(nucleus);GO:0006352(DNA-templated transcription, initiation);GO:0006355(regulation of transcription, DNA-templated);GO:0006383(transcription by…		K15196		BRF1, RNA polymerase III transcription initiation factor b [Source:ZFIN;Acc:ZDB-GENE-030131-6248]		0.333688	0.146055	0.269656	0.202811	1.04611	1.00549	0.856644	2.60659	0.432518	0.19601	0.929526	0.586906
ENSDARG00000005004	slc5a12	ENSDART00000156782;ENSDART00000009271	GO:0016020(membrane);GO:0016021(integral component of membrane);GO:0022857(transmembrane transporter activity);GO:0055085(transmembrane transport);GO:0055085(transmembrane transport)		K14388		solute carrier family 5 (sodium/monocarboxylate cotransporter), member 12 [Source:ZFIN;Acc:ZDB-GENE-040426-1343]		3.61681	2.74321	10.1791	0.55895	0.171453	5.36986	2.88326	1.6636	3.33128	2.30836	8.56307	0.105952
ENSDARG00000005010	si:dkeyp-2e4	ENSDART00000131673	GO:0003676(nucleic acid binding)				si:dkeyp-2e4.8 [Source:ZFIN;Acc:ZDB-GENE-061207-81]		1.25196	1.84656	1.12637	3.69334	0.811391	1.26946	1.16388	1.33595	1.85368	1.38339	1.17586	1.04277
ENSDARG00000005015	tspy	ENSDART00000007482	GO:0005634(nucleus);GO:0006334(nucleosome assembly)		K11285		testis specific protein Y-linked [Source:ZFIN;Acc:ZDB-GENE-030131-9158]		11.6809	18.1583	14.49	27.0525	11.3649	12.7991	8.40721	10.1842	6.95916	13.7109	11.0813	6.97634
ENSDARG00000005023	fkbp9	ENSDART00000004392;ENSDART00000151291	GO:0000413(protein peptidyl-prolyl isomerization);GO:0003755(peptidyl-prolyl cis-trans isomerase activity);GO:0005509(calcium ion binding);GO:0016853(isomerase activity);GO:0016853(isomerase activity)		K09575	EC:5.2.1.8	FKBP prolyl isomerase 9 [Source:ZFIN;Acc:ZDB-GENE-040801-23]		2.8909	0.375961	2.76672	1.14149	1.70166	6.03657	5.15022	2.88859	2.67235	1.2685	0.859045	18.2663
[truncated: 28,342 more rows]
[truncated: 2 more columns]
