# Supplementary material for: Transcriptomics integrated with metabolomics reveals the ameliorating effect of mussel-derived plasmalogens on high-fat diet-induced hyperlipidemia in zebrafish
Source: Royal Society of Chemistry journal article supplement (doi:10.1039/d3fo00063j), 2023-01-01
Supplement: d3fo00063j3.xlsx [file d3fo00063j3.xlsx]

## Sheet: S3 
Table S3. Profile of 6161 metabolites identified based on MS/MS.
ID	MZ	RT	Metabolite	Formula	HMDB	Superclass	Class	KEGG	Level1	Level2	Level3	Pathway	CK.4	CK.5	CK.6	CK.7	HDF.4	HDF.5	HDF.6	HDF.7	HDF_ATV.4	HDF_ATV.5	HDF_ATV.6	HDF_ATV.7	HDF_Pls.4	HDF_Pls.5	HDF_Pls.6	HDF_Pls.7	QC1	QC2	QC3	QC4	QC5	QC6	QC7
pos-3.212_280.1252	280.125	3.212	2139	C14H20N2O2S									935491	411787	324045	237983	886967	1.38653e+06	3.67996e+06	777112	1.31326e+06	539783	671664	601676	433096	212713	552994	502326	467438	347204	314845	371524	559188	506104	453376
neg-4.357_377.2234	377.223	4.357	2171	C22H27N5O									704231	872516	540158	440218	311435	392874	696918	360187	1.87307e+06	521283	536540	549634	551333	491002	2.73165e+06	1.64324e+06	1.54162e+06	1.83734e+06	1.1043e+06	1.61069e+06	1.38834e+06	1.4457e+06	1.28188e+06
neg-5.253_377.2229	377.223	5.253	2171	C22H27N5O									2.56432e+06	1.02164e+07	5.18605e+06	8.51856e+06	561233	3.22167e+06	442197	3.37113e+06	3.35695e+06	1.92742e+06	5.60997e+06	3.23532e+06	5.22819e+06	3.72376e+06	2.89069e+06	5.0066e+06	3.02774e+06	3.46132e+06	3.84517e+06	3.87137e+06	3.62282e+06	3.85386e+06	3.87008e+06
pos-4.075_377.22234	377.222	4.075	2171	C22H27N5O									187972	1.00703e+06	182087	274031	131294	151997	97862.6	103443	43428.5	69521.6	83140.3	175547	87487.5	88360.9	101916	43713.3	134568	132512	82631.3	139309	185502	131142	110974
neg-5.363_391.23891	391.239	5.363	2172	C23H29N5O									150508	129451	87487	87110.2	501988	163070	210258	105996	2.45701e+06	139992	5.75574e+06	423415	2.31848e+06	275582	149117	2.888e+06	858142	1.00027e+06	936865	758364	696467	893501	874044
neg-5.965_391.23897	391.239	5.965	2172	C23H29N5O									1.25859e+06	179542	726860	259131	301575	197140	227947	219003	158675	195547	374697	211088	3.25938e+06	2.45807e+06	8.11613e+06	3.84677e+06	2.76646e+06	2.85597e+06	2.76861e+06	2.79587e+06	3.31458e+06	3.01151e+06	3.24532e+06
pos-1.487_183.03509	183.035	1.487	2822	C8H9NO2S									377947	164763	104143	5.14603e+06	599912	293075	1.59474e+06	134563	1.12631e+06	1.15241e+07	1.85508e+06	205190	1.45211e+06	1.22774e+06	230932	1.8148e+06	1.09132e+06	1.50113e+06	1.33051e+06	1.61932e+06	1.52173e+06	1.77093e+06	1.64654e+06
neg-3.57_258.15788	258.158	3.57	2949	C12H22N2O4									97235.6	338294	97656.2	212209	117758	205841	103640	79793.9	4.87209e+06	184582	450509	122702	50585	88812.5	77343.6	113528	316984	347000	327327	336405	330722	416629	370465
pos-3.556_258.15778	258.158	3.556	2949	C12H22N2O4									652990	5.60733e+06	702141	960341	644330	772368	378762	392369	7.3176e+07	2.31846e+06	6.4939e+06	441420	669858	285111	324662	1.14931e+06	5.12617e+06	4.69547e+06	4.61742e+06	5.03386e+06	4.22613e+06	5.32604e+06	4.91874e+06
pos-0.894_331.13688	331.137	0.894	3149	C19H19F2NO2									9.30249e+06	3.68988e+06	4.44437e+06	6.03585e+06	7.61743e+06	6.51165e+06	5.98787e+06	6.04218e+06	4.98455e+06	4.70941e+06	5.05153e+06	5.0132e+06	6.40443e+06	5.40369e+06	7.97152e+06	6.88689e+06	4.37248e+06	3.55565e+06	4.86866e+06	3.13367e+06	4.59799e+06	4.05463e+06	3.82638e+06
pos-1.37_331.13712	331.137	1.37	3149	C19H19F2NO2									4.33893e+06	2.84433e+06	2.15992e+06	2.99046e+06	3.17562e+06	3.16102e+06	3.36589e+06	3.47547e+06	2.84653e+06	1.78974e+06	2.46171e+06	1.69048e+06	4.07247e+06	2.05934e+06	2.55872e+06	3.6396e+06	2.31346e+06	2.35476e+06	2.54953e+06	2.24829e+06	2.28192e+06	1.91455e+06	2.48085e+06
neg-4.03_302.02473	302.025	4.03	3962	C15H10O5S									916443	526174	388059	214693	526414	741827	1.83319e+06	1.24439e+06	545938	384410	364061	361661	542515	477900	807869	437489	415546	405532	297111	369033	370028	440930	368882
neg-3.325_843.39722	843.397	3.325	3977	C46H58ClN5O8									2.03426e+06	1.87607e+06	1.4338e+06	2.12779e+06	1.02113e+07	2.33759e+06	4.47254e+06	4.31327e+06	1.82804e+06	2.37767e+06	2.16382e+06	1.52765e+06	1.5844e+06	1.24133e+06	1.97041e+06	1.88857e+06	1.72797e+06	1.7371e+06	1.68073e+06	1.64944e+06	1.82726e+06	1.79008e+06	1.75908e+06
pos-3.318_843.39757	843.398	3.318	3977	C46H58ClN5O8									8.18167e+06	6.83034e+06	5.4547e+06	5.02213e+06	2.66654e+07	1.32868e+07	1.33336e+07	1.86632e+07	9.91804e+06	7.69583e+06	6.23017e+06	4.59264e+06	5.7899e+06	3.52704e+06	7.95246e+06	5.2309e+06	6.49283e+06	6.5595e+06	5.80473e+06	6.22125e+06	6.43549e+06	8.0279e+06	8.00638e+06
pos-3.169_227.10819	227.108	3.169	4564	C12H18ClNO									1.42757e+06	1.38009e+07	2.40613e+06	6.23347e+06	2.06522e+06	1.79373e+06	2.23749e+06	9.18369e+06	9.88317e+06	1.69385e+07	7.3434e+06	4.11938e+06	3.28103e+06	8.22296e+06	6.3751e+06	3.85232e+06	9.06901e+06	6.76436e+06	1.12368e+07	6.39642e+06	8.33457e+06	6.72317e+06	6.23967e+06
pos-1.561_227.10824	227.108	1.561	4564	C12H18ClNO									432103	1.3465e+06	4.07478e+06	1.11612e+06	716492	492813	566911	733051	662466	2.12599e+06	591311	395357	1.47146e+06	1.01075e+06	527549	1.20686e+06	795864	1.02144e+06	911290	928947	1.24462e+06	1.71472e+06	1.14711e+06
neg-4.929_590.26501	590.265	4.929	4939	C33H38N2O8									1.33236e+08	3.75937e+07	4.18174e+07	4.8127e+07	2.17476e+07	9.21128e+07	9.68649e+07	1.22087e+08	5.88107e+07	3.52132e+07	6.97424e+07	4.65686e+07	7.06772e+07	6.00676e+07	3.43169e+07	4.87686e+07	4.52488e+07	4.94021e+07	5.12392e+07	4.80602e+07	5.01105e+07	5.07152e+07	4.62739e+07
neg-4.275_590.26516	590.265	4.275	4939	C33H38N2O8									525572	8.08047e+06	840869	1.41086e+06	83876.8	298194	307254	1.8937e+06	1.68101e+07	695851	5.05683e+06	748037	6.16406e+06	464720	150671	1.26897e+06	3.43779e+06	4.57437e+06	4.08534e+06	4.13441e+06	4.05987e+06	4.65169e+06	4.16404e+06
neg-3.377_411.14238	411.142	3.377	5395	C22H22FN3O2S									1.48021e+07	226607	152666	438124	7.2926e+06	5.20649e+06	1.39387e+06	1.14697e+06	780404	453922	588645	1.22135e+06	566371	481117	403059	156121	544781	513203	628372	525366	550047	619021	578684
neg-5.152_392.25606	392.256	5.152	5722	C23H36O5									1.32212e+06	1.95675e+06	6.98362e+06	7.73937e+06	332274	1.6883e+06	110148	605854	1.43387e+06	1.60474e+06	1.7537e+06	1.57056e+06	947218	876878	861550	693885	1.43103e+06	1.2017e+06	1.12899e+06	1.42504e+06	1.75274e+06	1.41778e+06	1.40214e+06
neg-5.079_392.25603	392.256	5.079	5722	C23H36O5									2.57366e+06	4.86613e+06	1.35231e+07	1.6048e+07	462370	2.50736e+06	230582	839180	2.37888e+06	3.31848e+06	3.01288e+06	3.20425e+06	1.87714e+06	2.22757e+06	2.15496e+06	1.34584e+06	2.41157e+06	1.87825e+06	2.29644e+06	2.49436e+06	2.38239e+06	2.80231e+06	2.7639e+06
neg-0.906_339.11642	339.116	0.906	6683	C13H17N5O6									641335	508347	544282	173149	3.70703e+06	664766	2.69164e+06	653608	570135	187869	395856	433803	428159	721334	578150	2.50159e+06	758854	1.08524e+06	742039	789591	565193	714220	987160
neg-1.292_339.11641	339.116	1.292	6683	C13H17N5O6									156262	313283	238986	157973	804947	216537	643780	240865	221621	48939.1	178531	361257	38770.3	199695	296176	1.24213e+06	398775	393917	274931	325702	308684	347593	335892
pos-1.469_396.21151	396.212	1.469	6737	C25H32O2S									199186	3.19413e+06	1.6321e+06	2.68191e+06	240468	1.05659e+06	6.08283e+06	455764	1.01021e+07	4.5966e+06	7.42848e+06	1.72738e+06	603733	1.05996e+06	2.96519e+06	4.89707e+06	2.76561e+06	2.68117e+06	2.99274e+06	2.67891e+06	2.74289e+06	2.74191e+06	2.79604e+06
neg-3.381_349.01231	349.012	3.381	7028	C12H15NO5S3									2.27637e+06	273922	310841	464896	4.27915e+06	2.581e+06	1.2667e+06	1.60344e+06	529978	316774	567266	853082	1.35681e+06	796634	513433	317503	574490	649954	544605	612044	428912	411193	393179
pos-0.85_380.07112	380.071	0.85	7316	C18H18Cl2N2O3									9.89982e+06	1.12842e+08	1.17867e+08	1.34785e+08	1.47598e+08	2.22044e+08	3.24236e+07	1.29424e+08	6.49455e+07	6.61693e+07	3.94298e+07	1.12576e+08	4.15663e+07	7.25509e+07	8.19747e+07	3.13653e+07	7.69028e+07	8.09064e+07	7.71089e+07	8.74827e+07	8.16042e+07	7.77934e+07	7.24798e+07
pos-3.874_226.14627	226.146	3.874	398069	C15H18N2									152245	191945	136300	108498	6.24874e+06	413902	522998	3.42673e+06	53483.3	58579.4	89422.5	87020.8	108425	78112.7	93378	84048.2	131922	126144	189976	152603	121958	136904	178148
neg-3.553_295.10884	295.109	3.553	616470	C14H18ClN3O2									4.5091e+06	493851	463221	1.38684e+06	396626	1.1391e+06	2.03737e+06	851887	416367	435969	2.56345e+06	515683	1.28284e+06	926531	2.18675e+06	1.39267e+06	927197	1.09789e+06	982035	1.00535e+06	890174	806334	1.11116e+06
neg-0.664_321.89322	321.893	0.664	1884271	C12H6Cl4S									1.32326e+07	2.5493e+06	1.40661e+06	2.37412e+06	1.36883e+07	1.06003e+07	5.8724e+06	2.97784e+06	3.32516e+06	2.1854e+06	4.19462e+06	5.65912e+06	5.48692e+06	4.16761e+06	2.18702e+06	2.49049e+06	2.85547e+06	3.17634e+06	2.98149e+06	3.23845e+06	2.80481e+06	3.03671e+06	3.32201e+06
pos-3.23_198.17335	198.173	3.23	2209526	C11H22N2O									3.50976e+06	6.36796e+06	7.97931e+06	2.21747e+06	2.36357e+06	3.26318e+06	1.57642e+07	1.43264e+06	8.73994e+06	9.3708e+06	5.06682e+06	2.32595e+06	1.46599e+06	2.28404e+06	4.26326e+06	7.5303e+06	4.34404e+06	4.84538e+06	4.23358e+06	4.21686e+06	5.68942e+06	7.50936e+06	5.35521e+06
pos-3.47_198.17312	198.173	3.47	2209526	C11H22N2O									545451	167690	3.21716e+06	308722	2.3539e+06	158224	138330	1.2692e+06	1.02395e+06	995525	692621	535826	551346	522069	738247	1.29529e+06	633509	617077	643871	639348	505038	553285	460788
pos-5.816_260.13074	260.131	5.816	2215944	C18H16N2									228314	3.14572e+06	1.32288e+06	134504	2.06614e+07	2.17552e+07	3.45824e+07	1.73433e+07	159990	106589	197489	241599	445782	279192	459563	231849	1.46196e+06	1.25064e+06	1.74964e+06	1.56432e+06	1.49211e+06	1.94515e+06	2.01294e+06
neg-4.655_313.04071	313.041	4.655	8145294	C9H17ClN3O3PS									157177	903503	156185	403550	697238	1.75842e+06	1.0681e+07	2.95841e+06	126658	107066	158903	130255	403368	231804	649554	922662	570155	485556	613994	560552	599964	564332	533528
neg-4.525_313.04075	313.041	4.525	8145294	C9H17ClN3O3PS									91027.9	1.17261e+06	339972	264747	321551	1.21861e+06	7.6194e+06	2.02233e+06	46226.4	39629.3	55278.6	44989.3	234629	62049.3	268914	158761	415476	501664	494996	409535	443364	361570	477506
neg-6.592_302.11828	302.118	6.592	11343453	C17H19ClN2O									6.66416e+06	801039	1.3058e+06	4.31968e+06	1.20305e+07	1.12106e+07	4.21269e+07	6.56974e+06	1.66205e+06	4.09369e+06	757028	978799	1.33159e+07	1.23526e+07	1.92531e+06	3.19558e+06	3.38892e+06	3.44005e+06	3.22774e+06	3.36102e+06	3.32209e+06	3.57778e+06	3.26308e+06
neg-5.029_302.11821	302.118	5.029	11343453	C17H19ClN2O									606184	81895	122639	101685	88155.7	109088	2.41331e+06	379848	604738	398380	115169	227407	77907.4	1.12299e+06	1.67172e+06	476056	752029	652245	529688	465792	516330	475228	363816
neg-4.672_302.11839	302.118	4.672	11343453	C17H19ClN2O									882733	779287	398068	1.17599e+06	834682	3.02016e+06	1.28057e+06	2.25307e+06	891495	431575	178935	130547	1.29809e+06	1.46014e+06	2.40818e+06	1.68645e+06	745497	765367	653576	766373	881233	988305	801365
neg-4.299_302.11844	302.118	4.299	11343453	C17H19ClN2O									1.01676e+06	411512	339550	607238	362848	1.82366e+06	1.86398e+06	318625	879666	245858	275263	259229	2.17449e+06	1.78037e+06	4.14087e+06	2.0394e+06	858770	915758	695723	664725	674376	745797	741724
neg-4.343_377.18681	377.187	4.343	11644658	C20H28ClN3O2									914812	215625	86802.6	129489	224533	328826	694684	64505.2	141178	52246.8	154508	54303.3	294735	512193	1.64376e+06	208013	369204	376126	303117	362387	195622	247596	296267
pos-3.309_377.18859	377.189	3.309	11644658	C20H28ClN3O2									9.62433e+06	2.2989e+06	2.36563e+06	1.04177e+06	4.24623e+06	3.51218e+06	839495	1.01317e+06	1.43603e+06	464919	822358	1.41329e+06	440418	762711	1.40117e+06	1.35891e+06	1.09269e+06	1.28209e+06	1.1611e+06	1.28547e+06	1.39177e+06	1.53142e+06	1.1263e+06
neg-3.943_377.18684	377.187	3.943	11644658	C20H28ClN3O2									1.11856e+06	298527	36854.1	355268	101329	174762	66357.1	331946	34884.6	168177	1.48947e+06	143830	1.51745e+06	2.91774e+06	4.19444e+06	3.54594e+06	2.26051e+06	2.36852e+06	2.33009e+06	2.44772e+06	2.36041e+06	2.65799e+06	3.45379e+06
neg-4.062_390.18907	390.189	4.062	(-)-11-hydroxy-9,10-dihydrojasmonic acid 11-beta-d-glucoside	C18H30O9									4.89261e+06	1.78498e+06	621680	446970	553686	1.81464e+06	4.65926e+06	1.46077e+06	811142	869002	991256	797723	1.70701e+06	3.43448e+06	3.16433e+06	1.35617e+06	1.37808e+06	1.39478e+06	1.36061e+06	1.41556e+06	1.34517e+06	1.25145e+06	1.41179e+06
pos-3.08_478.2828	478.283	3.08	(-)-2,3-dehydroemetine	C29H38N2O4									84767.8	2.42412e+06	1.20689e+06	1.64596e+06	315640	556553	2.42206e+06	698753	3.39615e+06	4.49042e+06	2.66222e+06	1.71282e+06	1.11113e+06	1.85564e+06	1.55673e+06	1.55503e+06	1.74673e+06	1.77232e+06	1.97379e+06	1.97662e+06	1.71124e+06	1.8215e+06	1.94175e+06
neg-6.587_204.18728	204.187	6.587	(-)-alpha-cedrene	C15H24	HMDB0059695	Lipids and lipid-like molecules	Prenol lipids	C09630					551782	763672	1.82552e+06	2.61622e+06	769470	1.91773e+06	251392	1.90196e+06	1.34475e+06	1.20847e+06	1.77238e+06	1.68646e+06	747737	566412	370244	399121	771947	865944	842075	948437	803015	758061	786822
neg-6.229_204.18725	204.187	6.229	(-)-alpha-cedrene	C15H24	HMDB0059695	Lipids and lipid-like molecules	Prenol lipids	C09630					2.04609e+06	4.08243e+06	6.9223e+06	7.80898e+06	3.83352e+06	4.49692e+06	697361	6.08933e+06	3.59183e+06	3.56178e+06	4.22502e+06	4.2898e+06	2.86287e+06	2.41808e+06	1.85297e+06	1.75732e+06	2.55054e+06	2.84407e+06	3.26882e+06	2.7546e+06	2.7361e+06	2.94255e+06	3.01432e+06
pos-6.57_204.18725	204.187	6.57	(-)-alpha-cedrene	C15H24	HMDB0059695	Lipids and lipid-like molecules	Prenol lipids	C09630					1.55507e+07	1.05348e+07	3.14213e+07	5.1404e+07	1.30132e+07	3.74032e+07	6.90452e+06	1.70473e+07	12410771	1.22716e+07	2.67325e+07	1.54191e+07	8.23672e+06	1.08697e+07	6.72959e+06	6.17141e+06	1.61925e+07	1.76968e+07	1.46593e+07	1.5518e+07	1.21313e+07	9.96628e+06	1.0435e+07
pos-5.566_154.13648	154.136	5.566	(-)-borneol	C10H18O	HMDB0034976	Lipids and lipid-like molecules	Prenol lipids	C01766					2.19597e+06	491454	653055	1.19907e+06	407470	3.31682e+06	634897	344344	582626	446005	2.24975e+06	1.48119e+06	835758	983804	720843	447193	702839	873992	737221	797379	762665	818927	967446
neg-5.07_394.18831	394.188	5.07	(-)-brucine	C23H26N2O4									165165	637749	815252	1.863e+06	793091	402572	175603	2.82857e+06	700721	515470	769707	725664	294145	246983	238253	756957	486262	403891	457226	470921	452866	435810	257860
neg-5.569_394.18846	394.188	5.569	(-)-brucine	C23H26N2O4									2.78193e+06	1.86686e+06	9.36113e+06	8.78427e+06	2.78686e+06	7.81312e+06	2.39346e+06	6.29773e+06	4.05229e+06	2.96894e+06	6.77247e+06	4.82203e+06	1.86167e+06	2.759e+06	1.28364e+06	1.48313e+06	2.92266e+06	2.87536e+06	2.94312e+06	2.87928e+06	3.08571e+06	2.82728e+06	2.75526e+06
neg-5.688_394.18829	394.188	5.688	(-)-brucine	C23H26N2O4									614441	838763	3.07145e+06	4.25154e+06	871022	2.53457e+06	141961	1.44779e+06	1.4477e+06	979521	2.30321e+06	1.86096e+06	758108	693812	421038	423714	950698	1.07247e+06	1.01589e+06	1.14369e+06	978540	997723	982633
neg-5.498_394.1883	394.188	5.498	(-)-brucine	C23H26N2O4									2.66081e+06	764955	1.01655e+07	1.10492e+07	1.88673e+06	3.89965e+06	1.09714e+06	2.41696e+06	1.47933e+06	2.53229e+06	4.11569e+06	4.21377e+06	1.54497e+06	1.55085e+06	594681	371216	1.88839e+06	1.83103e+06	1.87941e+06	1.8917e+06	1.97072e+06	1.83395e+06	2.00656e+06
pos-6.9_220.18213	220.182	6.9	(-)-caryophyllene oxide	C15H24O									2.58333e+06	1.11678e+06	2.79782e+06	9.05898e+06	1.44039e+06	5.87209e+06	1.62441e+06	3.42707e+06	4.54597e+06	1.09311e+06	3.73754e+06	1.89008e+06	9.53688e+06	1.92171e+07	1.89978e+07	1.15816e+07	1.38559e+07	1.34637e+07	1.14648e+07	1.06401e+07	1.04703e+07	7.29644e+06	8.58344e+06
pos-3.331_438.25961	438.26	3.331	(-)-fusicoplagin a	C24H38O7									419720	6.00403e+06	4.21386e+06	4.16313e+06	2.63312e+06	659264	3.66641e+06	5.64158e+06	3.38874e+06	3.02345e+06	2.83748e+06	2.31095e+06	1.89397e+06	2.29897e+06	5.11183e+06	5.34463e+06	3.18397e+06	3.06257e+06	4.72501e+06	3.90951e+06	3.94638e+06	3.29344e+06	4.00831e+06
pos-1.484_338.11555	338.116	1.484	(-)-glyceollini	C20H18O5									1.58865e+07	5.20581e+06	5.02688e+06	4.74306e+06	2.11613e+07	1.27358e+07	1.00332e+07	1.44738e+07	3.15173e+06	1.32891e+06	2.32378e+06	8.40914e+06	7.75627e+06	4.1487e+06	4.67354e+06	4.07351e+06	4.53071e+06	4.15621e+06	5.14908e+06	4.83906e+06	5.76721e+06	5.61894e+06	5.6998e+06
neg-4.072_210.12524	210.125	4.072	(-)-jasmonicacid	C12H18O3									2.62638e+06	190695	817212	1.90722e+06	795363	2.17102e+06	817141	852288	372282	300783	1.04015e+06	597731	428254	1.35925e+06	287536	302683	547279	569839	524839	528463	516730	588819	600765
neg-3.424_220.05801	220.058	3.424	(-)threo-iso(homo)2citrate	C8H12O7									896944	9.4132e+06	9.37493e+06	1.25609e+06	1.65063e+08	8.23494e+07	1.37281e+08	9.18612e+07	679749	57068.6	219674	273864	1.7933e+06	2.22892e+06	1.21891e+06	713919	1.48122e+07	1.40861e+07	1.46702e+07	1.50179e+07	1.54263e+07	1.54315e+07	1.58773e+07
neg-1.367_991.32942	991.329	1.367	isopentadecanoyl-coa	C36H64N7O17P3S	HMDB0112245	Lipids and lipid-like molecules	Fatty Acyls						280917	2.33182e+06	2.93776e+06	2.49094e+06	4.75885e+06	4.42628e+06	248199	2.89399e+06	1.09972e+06	1.04515e+06	458352	2.97791e+06	280803	1.09109e+06	1.32572e+06	347693	1.29306e+06	1.18069e+06	1.22178e+06	1.17481e+06	1.30143e+06	1.47598e+06	1.20862e+06
pos-3.643_426.18998	426.19	3.643	(+)-abscisic acid beta-d-glucopyranosyl ester	C21H30O9									137736	1.0686e+06	1.14501e+06	81369.1	1.4432e+06	439170	742298	78078.4	1.53779e+06	1.53e+06	1.47764e+06	1.39892e+06	107585	60971.5	814045	798438	934138	1.07057e+06	1.10479e+06	980255	1.07248e+06	1.07276e+06	893690
pos-5.325_166.09886	166.099	5.325	(+)-bornane-2_5-dione	C10H14O2									1.97844e+07	1.26299e+07	8.57952e+06	1.27156e+07	9.12579e+06	1.99347e+07	1.69238e+07	4.91997e+06	6.61984e+06	5.77007e+06	5.20879e+06	1.07638e+07	6.87222e+06	6.71842e+06	4.95548e+06	8.96634e+06	8.07062e+06	7.68525e+06	6.12125e+06	7.38444e+06	6.49354e+06	6.9765e+06	6.81195e+06
pos-4.596_166.09892	166.099	4.596	(+)-bornane-2_5-dione	C10H14O2									857301	346337	455261	1.69012e+06	596801	909686	558141	275849	610886	361396	376864	407244	1.3213e+06	697235	513745	1.3066e+06	444508	498433	531541	648631	636017	507615	303746
neg-4.474_400.1519	400.152	4.474	(+)-echinoisoflavanone	C22H24O7									639391	1.69704e+06	562551	719866	418103	1.88994e+06	2.36704e+07	4.16552e+06	978975	812306	731910	955467	8.04452e+06	1.26707e+07	1.77243e+07	8.56477e+06	3.89278e+06	3.42678e+06	2.68918e+06	3.63191e+06	2.58101e+06	4.71432e+06	2.72887e+06
pos-4.147_458.19055	458.191	4.147	(+)-fluprostenol	C23H29F3O6									899880	1.58536e+06	908971	684867	2.97635e+06	8.40731e+06	2.15185e+07	3.46846e+06	438829	221071	309557	244347	3.0211e+06	5.98992e+06	2.773e+06	4.94286e+06	1.48648e+06	1.38329e+06	1.49552e+06	2.20754e+06	1.58005e+06	1.73252e+06	1.6832e+06
pos-4.203_458.19039	458.19	4.203	(+)-fluprostenol	C23H29F3O6									174804	2.07433e+06	299430	214594	749149	2.04092e+06	5.32257e+06	3.10269e+06	280602	78733.1	151667	131456	781341	1.90239e+06	806617	566614	419336	649959	676325	487904	857418	772361	623782
pos-0.9_306.07543	306.075	0.9	(+)-gallocatechin	C15H14O7	HMDB0038365	Phenylpropanoids and polyketides	Flavonoids	C12127	Metabolism|Metabolism	Biosynthesis of other secondary metabolites|Global and overview maps	Flavonoid biosynthesis|Biosynthesis of secondary metabolites	map00941|map01110	9.79201e+07	4.07314e+07	2.18506e+07	2.72319e+07	2.77417e+06	5.30681e+07	7.04046e+06	3.67964e+06	4.20781e+07	3.43463e+07	4.69641e+07	7.66939e+07	9.94368e+07	8.16212e+07	3.0915e+07	2.16155e+07	2.88882e+07	3.5946e+07	3.20903e+07	3.38244e+07	3.14866e+07	3.34638e+07	2.89743e+07
pos-5.512_360.22893	360.229	5.512	(+/-)11(12)-dihet	C20H34O4									5.07864e+08	1.5632e+08	3.8989e+08	5.80787e+08	8.65626e+07	6.32298e+08	7.5146e+07	1.45724e+08	1.6459e+08	206933557	3.63868e+08	2.90455e+08	2.24487e+08	2.7694e+08	167704962	9.3823e+07	2.28069e+08	2.43486e+08	228774818	206948368	1.98159e+08	170021606	1.8346e+08
pos-5.306_360.22888	360.229	5.306	(+/-)11(12)-dihet	C20H34O4									2.48406e+08	4.56906e+07	8.03234e+07	4.28713e+08	1.49662e+07	2.06211e+08	8.3766e+06	1.49038e+07	3.49986e+07	3.90999e+07	1.82401e+08	1.31625e+08	3.67604e+07	4.39138e+07	2.00644e+07	2.48842e+07	5.43553e+07	5.08952e+07	5.1305e+07	4.74117e+07	4.90846e+07	3.25366e+07	3.63149e+07
pos-6.101_302.22359	302.224	6.101	(+/-)11(12)-eet	C20H32O3									5.25644e+08	5.59136e+07	4.79434e+08	1.68203e+08	1009385477	667224671	8.61031e+08	1448338757	285635165	2.09894e+08	3.49705e+08	2.37767e+08	8.3691e+07	3.99536e+08	1.168e+08	1.46225e+08	2.46801e+08	2.4582e+08	254231781	2.26026e+08	2.54249e+08	2.06885e+08	1.96914e+08
pos-6.224_302.2236	302.224	6.224	(+/-)11(12)-eet	C20H32O3									1149500617	1369900528	2603803362	3255195468	1523035537	2216177124	3.57677e+08	2514438324	1278209639	1310264082	1775183896	1604452951	1165621526	1228222422	742777973	6.55152e+08	1335782560	1413846302	1399142878	1335043188	1230265666	1103580400	1079518936
neg-6.924_296.23462	296.235	6.924	(+/-)12(13)-dihome	C18H34O4									1.06297e+06	995658	1.41365e+06	2.39246e+06	803950	854833	958140	458782	1.10836e+07	1.77836e+06	895547	1.09883e+06	1.41825e+06	1.21693e+06	1.78464e+06	1.87335e+06	1.56252e+06	1.51089e+06	1.49678e+06	1.82324e+06	1.46973e+06	1.45615e+06	1.51941e+06
pos-6.528_296.23441	296.234	6.528	(+/-)12(13)-dihome	C18H34O4									2.12986e+07	2.80108e+07	2.53093e+07	4.41914e+07	7.88645e+06	2.14751e+07	5.33889e+06	6.6353e+06	7.10968e+06	1.46182e+07	1.90944e+07	1.31869e+07	1.23113e+07	1.31334e+07	1.26394e+07	6.96401e+06	1.85099e+07	1.35735e+07	1.68331e+07	1.45877e+07	1.43242e+07	1.00548e+07	1.32731e+07
neg-5.129_314.2455	314.245	5.129	(+/-)12(13)-dihome	C18H34O4									1.06776e+07	1.5631e+07	1.99702e+07	3.2262e+07	1.90155e+06	1.23642e+07	4.11496e+06	2.98901e+06	4.63856e+06	9.40596e+06	6.16242e+06	8.85186e+06	1.40875e+07	7.8266e+06	1.02024e+07	1.30848e+07	9.93498e+06	9.23228e+06	9.08537e+06	9.74629e+06	1.01408e+07	9.53468e+06	9.745e+06
neg-5.188_314.24553	314.246	5.188	(+/-)12(13)-dihome	C18H34O4									4.80646e+06	5.35478e+06	1.21698e+07	1.81018e+07	447494	6.35991e+06	2.16959e+06	1.31004e+06	2.99895e+06	5.59859e+06	4.80796e+06	5.94809e+06	7.28928e+06	3.98849e+06	2.807e+06	3.06385e+06	3.08324e+06	4.31738e+06	5.05289e+06	3.17466e+06	3.9575e+06	4.23572e+06	3.87972e+06
pos-6.349_296.23434	296.234	6.349	(+/-)12(13)-dihome	C18H34O4									4.28786e+07	6.41183e+07	1.3181e+08	1.01988e+08	4.24536e+06	3.46757e+07	2.01205e+07	2.14899e+07	2.21195e+07	7.38669e+07	2.84934e+07	4.37114e+07	1.05815e+08	4.98138e+07	8.85154e+07	9.24425e+07	6.38429e+07	63355533	6.23696e+07	5.65401e+07	5.47253e+07	5.14984e+07	5.28728e+07
neg-5.592_296.23466	296.235	5.592	(+/-)12(13)-dihome	C18H34O4									2.63054e+06	2.41278e+06	6.95791e+06	9.29966e+06	371251	2.63236e+06	690471	754240	1.37484e+06	1.72339e+06	2.66645e+06	3.3044e+06	1.49613e+06	1.49742e+06	1.51079e+06	1.52753e+06	1.84901e+06	1.96238e+06	1.57864e+06	1.77926e+06	2.21364e+06	2.0873e+06	2.24047e+06
neg-5.004_314.2455	314.245	5.004	(+/-)12(13)-dihome	C18H34O4									2.94143e+06	3.04534e+06	4.05187e+06	7.87284e+06	600371	1.96e+06	378859	593696	821581	1.76591e+06	1.45649e+06	1.8021e+06	2.85632e+06	1.98671e+06	2.09287e+06	2.97749e+06	1.92266e+06	2.42392e+06	1.93245e+06	1.8547e+06	1.91615e+06	2.14946e+06	2.07209e+06
neg-5.852_296.23461	296.235	5.852	(+/-)13-hode	C18H32O3									5.43903e+07	1.00061e+07	3.25345e+07	6.41379e+06	8.16314e+06	1.99282e+07	8.42809e+06	1.78139e+07	1.06167e+07	9.371e+06	1.27376e+07	1.3952e+07	9.52257e+06	1.98617e+07	6.29454e+06	9.51625e+06	1.13995e+07	1.0702e+07	1.1213e+07	1.14669e+07	1.21252e+07	1.10343e+07	1.15102e+07
neg-5.857_314.24531	314.245	5.857	(+/-)13-hode	C18H32O3									5.5651e+07	1.10454e+07	3.4103e+07	4.24258e+07	8.36533e+06	2.04005e+07	8.75963e+06	1.7899e+07	1.13681e+07	1.03804e+07	1.34871e+07	1.47866e+07	1.02777e+07	2.04241e+07	7.23384e+06	1.02651e+07	1.2137e+07	1.14795e+07	1.19783e+07	1.23059e+07	1.29669e+07	1.17777e+07	1.21995e+07
neg-5.278_338.24555	338.246	5.278	(+/-)14(15)-dihet	C20H34O4									859653	1.24921e+06	3.94175e+06	5.21069e+06	1.95904e+06	1.31467e+06	8.20436e+06	704292	274381	1.31278e+06	2.55071e+06	1.60252e+06	1.12226e+06	3.21563e+06	2.19813e+06	1.86556e+06	1.9403e+06	1.79811e+06	1.75793e+06	1.89239e+06	1.95506e+06	2.171e+06	1.85817e+06
neg-5.389_338.24558	338.246	5.389	(+/-)14(15)-dihet	C20H34O4									1.78015e+06	761470	7.62922e+06	1.53793e+07	1.4107e+06	4.85959e+06	2.6775e+06	1.97662e+06	855216	1.89059e+06	4.10026e+06	3.27615e+06	996744	1.13453e+06	1.71864e+06	992597	2.94433e+06	2.66232e+06	2.08607e+06	1.95056e+06	1.36701e+06	2.42502e+06	2.51864e+06
neg-5.253_362.24544	362.245	5.253	(+/-)19(20)-dihdpa	C22H34O4									5.92693e+06	2.11563e+06	7.95756e+06	9.89334e+06	2.88044e+06	2.82868e+06	2.0238e+07	1.68865e+06	369391	482048	1.71006e+06	3.46682e+06	7.3064e+06	5.43273e+06	9.86109e+06	9.13124e+06	5.22811e+06	6.01643e+06	6.00259e+06	6.09367e+06	2.62598e+06	4.08389e+06	3.93746e+06
pos-6.497_320.2343	320.234	6.497	(+/-)5(6)-dihet	C20H34O4									882485	847996	9.4882e+06	1.84997e+07	7.02187e+06	3.37248e+06	1.70797e+06	1.65383e+06	2.44701e+06	1.79576e+06	3.41808e+06	2.46873e+06	1.19826e+06	2.2211e+06	2.79009e+06	1.14227e+06	4.25266e+06	4.24249e+06	3.33208e+06	4.71458e+06	4.29168e+06	2.14626e+06	3.4275e+06
pos-7.154_320.23429	320.234	7.154	(+/-)5(6)-dihet	C20H34O4									2.21124e+07	1.70458e+07	4.10653e+07	7.79233e+07	6.10629e+06	2.15437e+07	1.56567e+06	1.21646e+07	8.91012e+06	1.42234e+07	2.48046e+07	7.06886e+06	3.17045e+06	4.21747e+06	4.96635e+06	8.05845e+06	1.72566e+07	1.76614e+07	1.89464e+07	1.45512e+07	1.32162e+07	1.09409e+07	9.91597e+06
neg-5.92_338.24559	338.246	5.92	(+/-)5(6)-dihet	C20H34O4									9.81137e+06	7.99669e+06	2.24336e+07	4.41749e+07	1.4973e+06	7.97275e+06	1.22435e+06	5.13121e+06	4.172e+06	6.09062e+06	1.3156e+07	7.69541e+06	2.22382e+06	1.2542e+06	1.31031e+06	1.82486e+06	4.84437e+06	5.18904e+06	5.0404e+06	4.72736e+06	4.79952e+06	5.63326e+06	5.37666e+06
neg-4.96_354.24001	354.24	4.96	(+/-)5-ipf2伪-vi	C20H34O5									1.0535e+07	1.86426e+07	5.05787e+07	1.5546e+08	2.35972e+06	6.23566e+07	1.23873e+07	4.36783e+07	4.77538e+07	2.2276e+07	3.92765e+07	3.14673e+07	6.9453e+06	2.15453e+07	1.50055e+07	1.42361e+07	3.67717e+07	3.39567e+07	2.0856e+07	3.38094e+07	3.06127e+07	1.91607e+07	3.17333e+07
neg-5.496_336.22965	336.23	5.496	(+/-)5-ipf2伪-vi	C20H34O5									1.47396e+08	6.87103e+07	5.28112e+08	5.84804e+08	8.26472e+07	2.20984e+08	9.87707e+07	1.62027e+08	1.11581e+08	1.27391e+08	2.64322e+08	2.112e+08	8.87646e+07	9.45254e+07	4.82244e+07	2.94541e+07	1.01815e+08	1.01448e+08	9.94173e+07	9.59205e+07	1.04607e+08	1.07481e+08	1.09143e+08
pos-3.331_898.51218	898.512	3.331	(1'r,2s,4's,5s,6r,8'r,10'e,12's,13's,14'e,16'e,20'r,21'r,24's)-6-cyclohexyl-21',24'-dihydroxy-5,11',13',22'-tetramethyl-2'-oxo-5,6-dihydrospiro[pyran-2,6'-[3,7,19]trioxatetracyclo[15.6.1.1~4,8~.0~20,24~]pentacosa[10,14,16,22]tetraen]-12'-yl 2,6-dideoxy-4-o-[(3xi)-2,6-dideoxy-3-o-methyl-alpha-l-erythro-hexopyranosyl]-3-o-methyl-alpha-l-arabino-hexopyranoside	C50H74O14									65017.5	2.2014e+06	1.03483e+06	686095	96363.6	70747.9	1.38062e+06	238768	1.01182e+06	830083	241068	431857	714346	1.03058e+06	684640	906952	909869	932387	834187	1.07139e+06	937808	918365	983802
neg-5.775_881.53948	881.539	5.775	o-[(3-{[11-(3,4-dimethyl-5-propyl-2-furyl)undecanoyl]oxy}-2-{[11-(3-methyl-5-pentyl-2-furyl)undecanoyl]oxy}propoxy)(hydroxy)phosphoryl]serine	C47H80NO12P									1.57258e+06	484497	1.82332e+06	1.25458e+06	334231	1.26529e+06	111813	182330	458790	222496	236532	330575	3.86115e+06	1.33971e+06	335257	359441	473505	596431	593986	693809	539055	434443	361144
neg-1.367_828.2746	828.275	1.367	amylopectin	C30H52O26	HMDB0003255	Organic oxygen compounds	Organooxygen compounds	C00317					1.22951e+06	9.78085e+06	1.59587e+07	1.72843e+07	2.21265e+07	2.32966e+07	2.82064e+06	2.00626e+07	8.02419e+06	1.06524e+07	5.94514e+06	1.68599e+07	3.41516e+06	7.69646e+06	6.78419e+06	2.66493e+06	7.27431e+06	7.33144e+06	7.53722e+06	6.57622e+06	7.64913e+06	8.02466e+06	7.37386e+06
neg-0.899_828.27447	828.274	0.899	amylopectin	C30H52O26	HMDB0003255	Organic oxygen compounds	Organooxygen compounds	C00317					1.1919e+06	1.43439e+07	2.02304e+07	2.52499e+07	4.38266e+07	3.45531e+07	5.41764e+06	4.64928e+07	1.25317e+07	1.43517e+07	7.82781e+06	2.50155e+07	4.98499e+06	1.03423e+07	7.74546e+06	3.01198e+06	1.3939e+07	1.35526e+07	1.31635e+07	1.29925e+07	1.43068e+07	1.36515e+07	1.52247e+07
pos-3.302_790.39804	790.398	3.302	nostocyclopeptidea2	C40H54N8O9									120288	5.29866e+06	4.28426e+06	5.06345e+06	233905	889775	6.89891e+06	2.6843e+06	6.6951e+06	1.64075e+07	7.86172e+06	3.92623e+06	839455	1.15139e+07	3.19397e+06	3.34212e+06	5.24122e+06	4.44936e+06	3.58553e+06	4.9494e+06	5.31326e+06	5.68962e+06	5.71605e+06
neg-3.331_774.33951	774.34	3.331	(2r,6s,12z,13ar,14ar,16as)-6-{[(cyclopentyloxy)carbonyl]amino}-2-({2-[2-(isopropylamino)-1,3-thiazol-4-yl]-7-methoxy-4-quinolinyl}oxy)-5,16-dioxo-1,2,3,6,7,8,9,10,11,13a,14,15,16,16a-tetradecahydrocyclopropa[e]pyrrolo[1,2-a][1,4]diazacyclopentadecine-14a(5h)-carboxylic acid	C40H50N6O8S									54905.7	1.88251e+06	763484	1.06199e+06	85446.7	129083	3.02903e+06	789664	3.13823e+06	5.22771e+06	3.01823e+06	437143	779781	1.11951e+06	2.24443e+06	1.02073e+06	1.35529e+06	1.52254e+06	1.37456e+06	1.25722e+06	1.55956e+06	1.54349e+06	1.37358e+06
pos-4.159_684.54135	684.541	4.159	bis(1,2,2,6,6-pentamethylpiperidin-4-yl) butyl(3,5-di-tert-butyl-4-hydroxybenzyl)malonate	C30H74N10O3P2									392464	1.15738e+06	563967	106967	330712	196130	83102.7	88983.4	412609	677363	72567.6	64573.4	85140.6	112058	365034	41046.1	498884	382097	411965	449471	447640	408667	330409
neg-3.644_684.52246	684.522	3.644	pe-cer(d14:2(4e,6e)/22:1(13z))	C38H73N2O6P									5.00177e+06	1.81805e+06	7.03282e+06	1.93678e+06	170058	480124	202918	468865	1.36246e+06	2.58141e+06	1.50644e+06	1.00656e+06	1.29261e+06	947124	596220	1.60313e+06	648007	777120	730567	736329	804122	687948	797472
pos-3.648_684.5208	684.521	3.648	pe-cer(d14:2(4e,6e)/22:1(13z))	C38H73N2O6P									6.03264e+06	1.81848e+06	7.42692e+06	2.88179e+06	172644	596823	133157	676458	4.14838e+06	2.0693e+06	1.00432e+06	969991	953246	1.29525e+06	661297	1.6518e+06	559174	607241	505540	437219	511640	409720	436563
neg-4.294_651.26597	651.266	4.294	(2z,16z,18e,20s,21s,22r,23s,24s)-6,8,21,23,28-pentahydroxy-3,7,16,20,22,24,29-heptamethyl-26-oxa-14-azatetracyclo[23.2.2.1~9,13~.0~5,10~]triaconta-2,5,7,9,12,16,18-heptaene-4,11,15,27,30-pentone	C35H41NO11									6.21494e+06	2.52627e+06	3.45575e+06	2.71415e+06	86350.8	1.86548e+06	4.42175e+06	1.41348e+06	421866	4.4337e+06	2.5768e+06	5.08781e+06	1.88252e+06	3.10865e+06	3.30103e+06	2.67828e+06	2.41967e+06	2.38422e+06	2.31962e+06	2.39471e+06	2.44518e+06	2.42474e+06	2.5542e+06
neg-9.146_650.49826	650.498	9.146	pe-cer(d18:0(17me(3oh))/14:0)13me))	C34H71N2O7P									154556	55821.6	73767.5	2.22586e+07	237251	126408	106747	138331	152201	153471	2.01428e+07	1.13648e+06	178850	80665.9	155537	161520	2.73915e+06	2.09467e+06	2.55668e+06	2.35448e+06	2.21241e+06	2.35044e+06	2.04979e+06
neg-6.551_314.24551	314.246	6.551	(+/-)9,10-dihydroxy-12z-octadecenoic acid	C18H34O4									146382	111456	101868	131895	304978	365410	278234	320313	75074.8	46154.9	99174.7	201428	3.52862e+06	1.15233e+06	5.46373e+06	3.98427e+06	1.05204e+06	1.03794e+06	1.13294e+06	1.11158e+06	1.27434e+06	1.06276e+06	1.2078e+06
neg-6.766_314.24549	314.245	6.766	(+/-)9,10-dihydroxy-12z-octadecenoic acid	C18H34O4									382573	60054.1	508039	118795	743721	168332	124959	336195	54122.4	121784	143809	51250.7	636203	1.2563e+06	2.54348e+06	2.50137e+06	2.12972e+06	2.21563e+06	2.17887e+06	2.5067e+06	2.273e+06	1.7405e+06	2.12065e+06
neg-5.677_312.22981	312.23	5.677	(+/-)9-hpode	C18H32O4									6.9866e+07	2.27733e+07	4.63183e+06	8.3556e+06	5.87485e+06	1.32399e+08	7.76151e+07	1.42058e+06	9.92302e+06	1.25206e+07	1.32365e+07	2.18802e+07	8.00799e+06	6.87394e+06	6.14061e+06	2.62094e+06	1.32676e+07	1.2432e+07	1.30366e+07	1.28072e+07	1.38246e+07	1.30894e+07	1.25304e+07
neg-5.262_312.22984	312.23	5.262	(+/-)9-hpode	C18H32O4									2.23814e+07	3.40767e+06	1.5542e+07	3.01229e+07	490239	9.28809e+06	989720	4.07988e+06	4.42818e+06	3.53013e+06	9.25979e+06	5.46837e+06	3.19371e+06	6.86701e+06	1.862e+06	2.07469e+06	5.27722e+06	5.02134e+06	5.36533e+06	5.12855e+06	5.20253e+06	4.75235e+06	5.23632e+06
neg-4.902_312.22983	312.23	4.902	(+/-)9-hpode	C18H32O4									2.69361e+06	2.63864e+06	6.36925e+06	1.48829e+07	496360	1.09918e+06	455902	555863	627827	1.49584e+06	1.42045e+06	1.10674e+06	1.70593e+06	1.48457e+06	2.10209e+06	4.0442e+06	3.73658e+06	3.05171e+06	3.06831e+06	2.9253e+06	3.74907e+06	2.09322e+06	2.07956e+06
pos-6.449_334.24981	334.25	6.449	(+/-)-cp 47,497-c7-hydroxy metabolite	C21H34O3									3.01e+06	4.39879e+06	7.8073e+06	1.16254e+07	3.31262e+06	1.69832e+06	4.8206e+06	1.41993e+06	4.74759e+06	3.64508e+06	1.70525e+06	3.57316e+06	1.49613e+06	4.28332e+06	2.80681e+06	3.97366e+06	4.94384e+06	4.46652e+06	3.95096e+06	3.8213e+06	3.65995e+06	3.57155e+06	3.65657e+06
pos-3.136_190.10291	190.103	3.136	(+/-)-isobutyl 3-methylthiobutyrate	C9H18O2S	HMDB0032346	Lipids and lipid-like molecules	Fatty Acyls						206371	719888	656492	375602	209358	166563	392718	341643	1.06766e+06	924121	310532	400955	159418	249701	346556	603992	590381	330494	406983	399364	366658	426895	537538
neg-9.148_582.07197	582.072	9.148	(+/-)-telomestatin	C26H14N8O7S									352568	44193.2	58362.3	823583	187705	100278	84454.5	109442	1.04784e+06	880258	1.98693e+06	772672	704782	2.17243e+06	822235	1.07513e+07	1.05875e+06	1.23656e+06	816302	951915	715863	722399	614489
pos-4.803_470.37831	470.378	4.803	(10e)-19-(3-carboxylpropyl)vitamin d3 / (10e)-19-(3-carboxylpropyl)cholecalciferol	C31H50O3									2.07923e+08	1.97313e+07	3.37159e+07	4.30171e+07	5.83357e+06	7.71857e+07	2.11524e+08	1.05327e+08	9.0627e+07	6.8055e+07	3.42617e+07	7.49692e+07	1.14203e+08	5.9876e+07	6.5909e+07	3.90682e+07	1.11695e+08	8.82506e+07	7.88607e+07	8.93517e+07	8.2538e+07	7.65953e+07	9.23499e+07
neg-6.428_649.35676	649.357	6.428	ohodia-pe	C31H56NO11P									998741	708131	155868	327851	949875	142639	141597	590656	468971	86447.7	457180	318977	941631	1.05839e+06	1.13559e+06	2.26195e+06	704750	778527	826857	652969	567741	448407	477812
pos-4.661_296.21316	296.213	4.661	(11z)-8,18-methano-retinal	C21H28O									3.12672e+06	1.57426e+06	3.05788e+06	5.28648e+06	703053	6.74707e+06	1.53007e+06	1.67507e+06	2.24923e+06	2.27596e+06	3.07613e+06	2.98645e+06	1.95583e+06	2.85006e+06	2.17471e+06	1.31948e+06	1.98149e+06	1.96881e+06	2.19839e+06	1.93154e+06	1.90385e+06	1.37762e+06	1.79678e+06
pos-5.511_296.21325	296.213	5.511	(11z)-8,18-methano-retinal	C21H28O									2.05361e+06	649511	1.73003e+06	2.55592e+06	625610	2.53984e+06	537965	1.12389e+06	837472	683493	1.76945e+06	1.171e+06	762225	1.41502e+06	701407	563686	984652	858941	694618	610693	746289	695716	593938
pos-4.039_296.21305	296.213	4.039	(11z)-8,18-methano-retinal	C21H28O									495615	135846	86105.7	3.34454e+06	522051	171928	1.88073e+06	90814.4	206029	739706	342950	337594	1.43198e+06	139805	1.47858e+06	4.04946e+06	1.08504e+06	1.1006e+06	1.14533e+06	1.04057e+06	1.09983e+06	1.20454e+06	1.19228e+06
neg-5.564_296.21356	296.214	5.564	(11z)-8,18-methano-retinal	C21H28O									1.51453e+06	609492	1.86882e+06	2.53266e+06	161128	1.792e+06	281667	592365	1.58793e+06	1.02119e+06	2.7921e+06	1.2879e+06	723852	1.08695e+06	678846	476162	788596	845401	720204	881886	857506	829248	780904
pos-5.386_451.36503	451.365	5.386	(11z,14z)-eicosadienoylcarnitine	C27H49NO4									2.79364e+07	9.13485e+06	6.86472e+06	2.13642e+06	2.55812e+07	2.84616e+07	1.45157e+07	2.46038e+07	2.07901e+06	1.18435e+07	5.91558e+06	1.20245e+07	1.21997e+07	6.60489e+06	4.52894e+06	5.74752e+06	8.15898e+06	7.85541e+06	6.31341e+06	5.63398e+06	6.09131e+06	7.98822e+06	6.27122e+06
pos-5.448_451.36494	451.365	5.448	(11z,14z)-eicosadienoylcarnitine	C27H49NO4									726536	1.28867e+06	905783	3.02297e+06	815223	3.4942e+06	957068	1.11313e+06	467862	1.14194e+06	284252	391399	58557229	1.62334e+07	6.49857e+06	1.1032e+07	8.15898e+06	7.85541e+06	6.31341e+06	6.11302e+06	5.89387e+06	7.14889e+06	7.11621e+06
pos-5.89_479.39628	479.396	5.89	(13z,16z)-docosadienoylcarnitine	C29H53NO4									2.60946e+06	1.18842e+06	1.23827e+06	325124	1.59061e+06	2.626e+06	1.07581e+06	2.19993e+06	200454	888536	450135	1.00945e+06	2.21904e+07	7.05499e+06	4.20124e+06	7.24706e+06	2.67835e+06	2.65986e+06	2.84765e+06	2.45852e+06	2.94775e+06	3.6489e+06	3.18926e+06
pos-3.225_637.38004	637.38	3.225	(14e)-3-ethyl-7-hydroxy-2,8,12,16-tetramethyl-5,13-dioxo-10-(2-oxoethyl)-4,17-dioxabicyclo[14.1.0]heptadec-14-en-9-yl 3,4,6-trideoxy-3-(dimethylamino)-2-o-propionylhexopyranoside	C34H55NO10									1.85958e+06	1.60275e+06	1.68917e+06	747610	2.94497e+06	1.62042e+06	690519	1.43826e+06	1.4195e+06	1.5672e+06	2.82174e+06	5.91632e+06	6.79741e+06	1.64694e+06	3.62047e+06	1.80275e+06	2.07419e+06	1.7727e+06	1.82733e+06	1.82246e+06	1.99792e+06	1.68624e+06	1.83549e+06
pos-3.521_642.33722	642.337	3.521	3-[(hydroxy{[(2r,3r,5s,6r)-2,3,4,5,6-pentahydroxycyclohexyl]oxy}phosphoryl)oxy]-1,2-propanediyl didecanoate	C29H55O13P									399434	6.65166e+06	4.91993e+06	3.87087e+06	2.12498e+06	1.32459e+06	4.34882e+06	5.11163e+06	8.27475e+06	7.99455e+06	3.736e+06	2.95959e+06	1.71802e+06	2.43862e+06	5.55571e+06	6.24679e+06	5.5379e+06	3.74226e+06	4.48605e+06	5.36041e+06	5.23081e+06	4.56502e+06	5.39456e+06
pos-3.548_784.43217	784.432	3.548	(15r,21s)-18,21,24,24-tetrahydroxy-3-methyl-18,24-dioxido-12-oxo-13,17,19,23-tetraoxa-18lambda~5~,24lambda~5~-diphosphatetracosan-15-yl (9z,11z)-9,11-octadecadienoate	C37H70O13P2									645307	4.16095e+06	9.33793e+06	1.85687e+06	909754	612736	610536	1.97938e+06	859395	1.83379e+06	434834	394977	903020	590411	268795	1.06362e+06	1.64981e+06	1.28468e+06	1.29106e+06	796363	1.1799e+06	1.39491e+06	1.45259e+06
pos-3.114_874.4766	874.477	3.114	(19r,25s)-22,25,28,28-tetrahydroxy-22,28-dioxido-16-oxo-17,21,23,27-tetraoxa-22lambda~5~,28lambda~5~-diphosphaoctacosan-19-yl (4z,7z,10z,13z,16z,19z)-4,7,10,13,16,19-docosahexaenoate	C44H76O13P2									79585.6	53701	443979	308919	422959	81502.7	81576.5	125956	696578	815042	1.81892e+06	1.3877e+06	113982	75265.3	4.64083e+06	136649	544408	709721	392300	397242	663601	560624	587025
pos-3.23_1096.57627	1096.58	3.23	(19z,21e,23e,25e,27e,29e,31e)-33-[(3-amino-3,6-dideoxy-beta-d-mannopyranosyl)oxy]-17-[7-(4-aminophenyl)-5-hydroxy-7-oxo-2-heptanyl]-1,3,5,9,11,37-hexahydroxy-18-methyl-13,15-dioxo-16,39-dioxabicyclo[33.3.1]nonatriaconta-19,21,23,25,27,29,31-heptaene-36-carboxylic acid	C58H84N2O18									1.06992e+06	870843	2.00346e+06	934672	3.0637e+06	1.35693e+06	280136	157007	1.67173e+06	1.38897e+06	3.1628e+06	3.46414e+06	4.26275e+06	738167	1.45488e+06	1.96588e+06	1.44897e+06	1.04794e+06	1.24331e+06	987119	1.30461e+06	917227	1.27576e+06
neg-0.876_347.14342	347.143	0.876	(1e)-n-(1-carboxy-2-hydroxypropyl)-3-[(carboxymethyl)amino]-5-hydroxy-5-(hydroxymethyl)-2-methoxy-2-cyclohexen-1-iminium	C14H23N2O8									341780	1.15525e+06	1.38645e+06	1.46666e+06	2.03437e+06	696767	2.0101e+06	4.85047e+06	1.23452e+06	2.71989e+06	1.25497e+06	462077	3.2487e+06	1.25503e+06	1.44189e+06	2.69017e+06	1.1504e+06	1.32062e+06	1.13878e+06	1.10584e+06	840551	1.62079e+06	1.23838e+06
neg-4.298_307.08763	307.088	4.298	(1r)-hydroxy-(2r)-n-acetyl-l-cysteinyl-1,2-dihydronaphthalene	C15H17NO4S				C14796	Metabolism	Xenobiotics biodegradation and metabolism	Metabolism of xenobiotics by cytochrome P450	map00980	272470	660269	141806	253958	259220	602615	4.12119e+06	1.39864e+06	491733	341580	140856	144294	384251	719195	910859	205767	616337	429199	449902	592681	389048	498777	566444
neg-5.862_635.34066	635.341	5.862	ohhdia-pe	C30H54NO11P									3.59973e+07	1.82101e+07	7.20858e+06	9.6509e+06	6.78498e+07	2.1281e+07	2.91971e+07	2.57733e+07	3.34281e+07	1.42629e+07	1.62862e+07	1.85873e+07	1.54725e+07	1.40373e+07	7.79205e+06	1.51804e+07	1.41879e+07	1.64571e+07	1.76751e+07	1.68669e+07	1.56119e+07	1.32894e+07	1.35169e+07
pos-3.229_496.23938	496.239	3.229	(1r,2s,3s,4r,6s)-3-[(3-acetamido-3-deoxy-alpha-l-xylopyranosyl)oxy]-4,6-diamino-2-hydroxycyclohexyl 2-amino-2-deoxy-alpha-d-glucopyranoside	C19H36N4O11									520988	6.05402e+06	6.05501e+06	8.30017e+06	1.24856e+07	2.8245e+06	9.15978e+06	1.11737e+07	2.21066e+07	1.82588e+07	1.67546e+07	1.58084e+07	5.48927e+06	4.08165e+06	1.32889e+07	9.83654e+06	1.02103e+07	9.12868e+06	8.56709e+06	1.07311e+07	9.74036e+06	9.87486e+06	1.02307e+07
neg-6.518_635.34065	635.341	6.518	ohhdia-pe	C30H54NO11P									293062	371230	130196	264913	1.26391e+06	400920	431452	836176	656729	346743	476048	156265	2.49169e+06	3.34372e+06	3.71167e+06	2.28271e+06	1.4658e+06	2.04584e+06	2.31927e+06	1.40947e+06	1.78965e+06	1.59577e+06	1.26923e+06
neg-6.184_635.34065	635.341	6.184	ohhdia-pe	C30H54NO11P									1.18232e+06	1.15496e+06	418147	1.35738e+06	2.87388e+06	805602	592297	1.58009e+06	1.60591e+06	422593	925619	880873	1.71607e+06	3.27454e+06	1.995e+06	4.59289e+06	1.91268e+06	1.459e+06	1.96069e+06	2.01222e+06	1.7386e+06	1.32778e+06	1.56964e+06
neg-6.001_635.34064	635.341	6.001	ohhdia-pe	C30H54NO11P									7.81335e+07	2.22881e+07	4.88497e+06	1.27303e+07	1.46218e+08	4.37594e+07	3.02666e+07	7.4586e+07	3.47887e+07	1.21746e+07	2.68385e+07	3.14915e+07	2.70034e+07	2.29918e+07	1.46893e+07	3.02396e+07	1.95043e+07	1.62757e+07	2.16839e+07	2.24181e+07	1.96955e+07	1.82533e+07	1.9095e+07
pos-0.878_258.08446	258.084	0.878	(1-ribosylimidazole)-4-acetate	C10H14N2O6	HMDB0002331	Nucleosides, nucleotides, and analogues	Imidazole ribonucleosides and ribonucleotides	C05131	Metabolism	Amino acid metabolism	Histidine metabolism	map00340	1.08672e+07	2.1043e+07	1.13319e+07	2.26272e+07	3.71096e+07	5.63596e+07	1.68608e+07	1.52065e+07	1.28338e+07	6.80325e+06	2.29492e+07	2.27161e+07	1.6768e+07	1.5695e+07	2.17399e+07	1.25299e+07	1.12538e+07	1.18285e+07	1.05434e+07	1.37969e+07	1.45519e+07	1.26863e+07	1.39515e+07
pos-6.611_358.24974	358.25	6.611	(1s)-1-hydroxy-23-oxo-24,25,26,27-tetranorcalciol	C23H34O3									1.56889e+06	1.06677e+06	999074	1.27711e+06	1.25761e+06	593867	692371	570152	1.04373e+06	631324	1.35017e+06	992046	918274	1.52146e+06	2.22477e+06	665002	1.40663e+06	1.4295e+06	1.24008e+06	1.25925e+06	853565	947736	660140
pos-5.021_358.24963	358.25	5.021	(1s)-1-hydroxy-23-oxo-24,25,26,27-tetranorcalciol	C23H34O3									6.23494e+06	3.37532e+06	371272	375390	1.27939e+06	998479	2.50869e+06	565644	1.97809e+06	414400	452520	1.01317e+06	2.30359e+06	2.79678e+06	2.49463e+06	1.64825e+06	2.16973e+06	1.89175e+06	1.63953e+06	1.83178e+06	1.47044e+06	1.63823e+06	1.14621e+06
neg-6.441_358.25056	358.251	6.441	(1s)-1-hydroxy-23-oxo-24,25,26,27-tetranorcalciol	C23H34O3									989387	4.12145e+06	5.93178e+06	7.8365e+06	1.02998e+06	2.60719e+06	136127	1.76999e+06	1.23937e+06	1.10486e+06	1.4592e+06	1.43201e+06	2.25627e+06	2.20404e+06	1.45633e+06	1.99521e+06	2.08648e+06	1.95839e+06	1.7706e+06	1.85445e+06	1.93694e+06	1.89133e+06	1.96976e+06
neg-5.369_633.32512	633.325	5.369	okhdia-pe	C30H52NO11P									1.47062e+07	1.12369e+07	2.45799e+06	2.65938e+06	2.08675e+07	8.79655e+06	9.70627e+06	7.92775e+06	1.23117e+07	4.2353e+06	6.1797e+06	7.15369e+06	5.26461e+06	4.33325e+06	3.03882e+06	4.50966e+06	5.71239e+06	5.78686e+06	5.99704e+06	5.56914e+06	5.51005e+06	5.05486e+06	5.32851e+06
neg-5.49_633.32492	633.325	5.49	okhdia-pe	C30H52NO11P									3.36442e+07	2.23381e+07	5.39433e+06	9.874e+06	6.00006e+07	2.02803e+07	1.78028e+07	2.87835e+07	2.19465e+07	1.33252e+07	1.60879e+07	2.0336e+07	1.41053e+07	1.79259e+07	1.3796e+07	2.39058e+07	1.3517e+07	1.51985e+07	1.53841e+07	1.44452e+07	1.41364e+07	1.2844e+07	1.32377e+07
pos-3.377_630.35802	630.358	3.377	peridinin	C39H50O7									5.21371e+06	4.40884e+07	2.8178e+07	2.02729e+07	1.34186e+07	3.46191e+06	1.61326e+07	1.35829e+07	2.02699e+07	1.73295e+07	1.40793e+07	1.3039e+07	9.27029e+06	9.38326e+06	1.40581e+07	2.28119e+07	1.48953e+07	1.12061e+07	1.38672e+07	1.20047e+07	1.08552e+07	1.82977e+07	1.39446e+07
pos-3.652_630.35796	630.358	3.652	peridinin	C39H50O7									177418	782743	1.94617e+06	840216	136078	109068	339647	160811	664752	2.65963e+06	351493	309089	690130	1.08375e+06	198455	459779	473056	501055	540428	485235	367573	466427	428934
neg-7.405_564.35969	564.36	7.405	(1s,2r,3s,4s,6r,7r,8r,14s)-3-hydroxy-2,4,7,14-tetramethyl-9-oxo-4-vinyltricyclo[5.4.3.0~1,8~]tetradec-6-yl {[2-methyl-1-(valylamino)-2-propanyl]sulfanyl}acetate	C31H52N2O5S									8.42287e+06	5.86166e+06	1.72553e+06	1.07309e+06	2.09491e+07	8.82828e+06	8.05839e+06	9.84171e+06	2.8626e+06	1.39955e+06	2.54098e+06	4.00068e+06	4.12205e+06	1.91246e+06	2.10625e+06	3.93918e+06	3.57321e+06	3.1759e+06	2.94503e+06	2.98382e+06	3.41454e+06	4.07002e+06	3.48333e+06
neg-6.664_385.26128	385.261	6.664	(1s,2r,7r,8r,11r,12r)-12-methyl-6-methylene-17-oxa-14-azahexacyclo[10.6.3.1~5,8~.0~1,11~.0~2,8~.0~14,18~]docos-7-yl acetate	C24H35NO3									2.60054e+06	780629	1.16478e+06	2.41277e+06	3.81297e+06	4.461e+06	4.76457e+06	1.6318e+06	2.1766e+06	4.04685e+06	4.75572e+06	2.06395e+06	1.03335e+07	3.81204e+06	7.01314e+06	2.26544e+06	3.05467e+06	3.394e+06	2.88755e+06	3.09348e+06	2.98876e+06	2.92091e+06	2.98698e+06
pos-6.658_385.26036	385.26	6.658	(1s,2r,7r,8r,11r,12r)-12-methyl-6-methylene-17-oxa-14-azahexacyclo[10.6.3.1~5,8~.0~1,11~.0~2,8~.0~14,18~]docos-7-yl acetate	C24H35NO3									4.56739e+06	1.03994e+06	1.39737e+06	2.27275e+06	2.24289e+06	2.60945e+06	5.69407e+06	652448	1.66911e+06	2.58179e+06	2.90874e+06	2.40103e+06	6.129e+06	3.11538e+06	5.23643e+06	1.83124e+06	2.52748e+06	2.92009e+06	2.46806e+06	2.3532e+06	1.97265e+06	2.7138e+06	1.65056e+06
pos-3.652_904.44815	904.448	3.652	(1s,3s,5z,7r,11s,12s,13e,15s,17r,21r,23r,25s)-25-acetoxy-1,11,21-trihydroxy-17-[(1r)-1-hydroxyethyl]-5,13-bis(2-methoxy-2-oxoethylidene)-10,10,26,26-tetramethyl-19-oxo-18,27,28,29-tetraoxatetracyclo[21.3.1.1~3,7~.1~11,15~]nonacos-8-en-12-yl (2e,4e)-2,4-octadienoate	C47H68O17									5.74707e+06	3.75299e+06	4.59175e+06	3.12583e+06	6.62827e+06	3.00254e+06	2.27047e+06	583914	5.22795e+06	3.97174e+06	4.81213e+06	3.77936e+06	9.36412e+06	3.92194e+06	2.20437e+06	1.67893e+06	3.5337e+06	3.48627e+06	3.81951e+06	3.34664e+06	2.98579e+06	3.03059e+06	3.17204e+06
pos-3.155_198.13677	198.137	3.155	(1s,6s)-6-aminooctahydro-1-indolizinyl acetate	C10H18N2O2									1.0351e+06	2.15299e+06	1.75179e+06	2.60796e+06	1.79289e+06	1.29966e+06	2.31473e+06	1.51356e+06	4.33552e+06	4.44871e+06	1.98483e+06	1.54017e+06	1.2284e+06	720679	1.05749e+06	2.70413e+06	2.4415e+06	2.30305e+06	2.66859e+06	1.81994e+06	2.08931e+06	2.15886e+06	1.64412e+06
pos-3.314_198.13679	198.137	3.314	(1s,6s)-6-aminooctahydro-1-indolizinyl acetate	C10H18N2O2									1.31406e+06	1.99279e+07	1.38013e+07	1.73879e+07	7.6893e+06	3.72333e+06	1.52495e+07	1.05685e+07	2.28801e+07	2.44889e+07	1.39296e+07	1.29759e+07	1.33285e+07	4.63126e+06	2.42334e+07	2.41658e+07	1.70442e+07	1.38101e+07	9.55418e+06	1.14754e+07	1.75641e+07	1.66537e+07	1.37871e+07
pos-3.429_198.13695	198.137	3.429	(1s,6s)-6-aminooctahydro-1-indolizinyl acetate	C10H18N2O2									209624	3.20493e+06	1.90174e+06	896991	1.27021e+06	487758	1.70602e+06	481052	2935356	3.37444e+06	1.75575e+06	1.63175e+06	1.15096e+06	631335	1.94825e+06	2.82961e+06	2.63391e+06	2.44848e+06	2.36213e+06	2.00775e+06	1.94555e+06	1.86804e+06	2.01951e+06
neg-3.595_160.07327	160.073	3.595	(1s_3r_4s)-3_4-dihydroxycyclohexane-1-carboxylate	C7H12O4									1.8217e+06	306103	399114	678377	718824	1.53848e+06	723896	671573	231724	198878	881473	468474	572419	963328	303773	229696	429507	541766	486191	451516	529571	534442	730420
neg-3.904_158.05754	158.058	3.904	(1s_4s)-4-hydroxy-3-oxocyclohexane-1-carboxylate	C7H10O4									289209	172737	123710	58265.2	3.35473e+06	3.93351e+06	7.37118e+06	3.27497e+06	82161.4	60512.2	72083.4	105046	119614	97452.6	65277.3	50995.8	414223	402508	394373	414343	409752	354917	402764
neg-3.423_158.05754	158.058	3.423	(1s_4s)-4-hydroxy-3-oxocyclohexane-1-carboxylate	C7H10O4									295388	379310	433625	37804.3	7.40142e+06	3.90219e+06	6.01068e+06	4.45436e+06	79400	61019.1	64085.3	79736.7	150389	103106	29243.9	42756.4	611457	536052	581252	629197	605499	622860	623908
neg-5.578_158.05749	158.057	5.578	(1s_4s)-4-hydroxy-3-oxocyclohexane-1-carboxylate	C7H10O4									1.90543e+06	2.78881e+06	7.37723e+06	1.07467e+07	1.64008e+06	7.01243e+06	674373	2.68737e+06	3.33134e+06	3.43296e+06	6.47689e+06	4.72962e+06	1.43115e+06	1.95833e+06	1.36685e+06	1.40515e+06	2.51778e+06	2.97954e+06	2.63691e+06	2.71704e+06	2.21772e+06	2.57875e+06	2.79267e+06
neg-5.687_158.05749	158.057	5.687	(1s_4s)-4-hydroxy-3-oxocyclohexane-1-carboxylate	C7H10O4									1.42203e+06	2.9036e+06	9.20273e+06	1.32361e+07	1.90689e+06	5.93088e+06	647939	2.66554e+06	3.93231e+06	3.93898e+06	7.12367e+06	5.00238e+06	1.53731e+06	1.99889e+06	1.05906e+06	1.64614e+06	3.32408e+06	3.1696e+06	3.40751e+06	3.28786e+06	2.83997e+06	3.35028e+06	2.45978e+06
neg-3.627_606.33798	606.338	3.627	(23s)-23-25-dihdroxy-24-oxovitamined323-(beta-glucuronide)	C33H50O10									51267.6	979199	4.86083e+06	731476	115659	32769.4	118162	68817.3	819087	1.87557e+06	523977	906493	986035	286244	131061	845121	901064	725258	977241	998572	948644	671983	839539
pos-6.204_422.30225	422.302	6.204	(23s)-methylcholic acid	C25H42O5									5.16592e+06	1.98483e+06	2.02998e+06	2.31121e+06	1.39106e+06	6.09121e+06	4.71757e+06	1.90491e+06	3.74279e+06	6.53009e+06	1.26402e+07	5.39549e+06	1.5173e+06	1.27823e+06	1.73595e+06	668229	3.3437e+06	2.54878e+06	2.00813e+06	3.04255e+06	2.93757e+06	2.80839e+06	2.432e+06
pos-6.089_422.30235	422.302	6.089	(23s)-methylcholic acid	C25H42O5									1.43003e+06	1.67841e+06	1.65374e+06	4.71961e+06	880204	974570	3.07121e+06	811833	5.0718e+06	4.86364e+06	5.97364e+06	2.89063e+06	630096	592761	1.36234e+06	694970	2.04103e+06	2.07653e+06	2.30779e+06	1.77169e+06	1.95604e+06	1.54814e+06	1.46301e+06
pos-4.969_470.29875	470.299	4.969	(25r)-26,26,26-trifluoro-1alpha,25-dihydroxyvitamin d3 / (25r)-26,26,26-trifluoro-1alpha,25-dihydroxycholecalciferol	C27H41F3O3									1.43065e+06	1.26642e+06	2.78146e+06	2.1708e+06	1.19461e+06	1.41338e+06	2.3521e+06	1.30005e+06	965830	2.78254e+06	2.21137e+06	1.64898e+06	1.94881e+06	4.93894e+06	4.53061e+06	2.69877e+06	2.11262e+06	2.29462e+06	2.28538e+06	2.11183e+06	3.16099e+06	2.1852e+06	2.34651e+06
neg-5.7_578.38143	578.381	5.7	(25s)-5&beta;-spirostan-3&beta;-ol3-o-&beta;-d-glucoside	C33H54O8									677744	180041	100376	82502	287795	273772	3.03107e+06	234196	352476	376680	597048	631598	496803	1.76511e+06	707738	254507	393928	447993	466235	491978	406846	385392	446419
neg-5.51_578.38129	578.381	5.51	(25s)-5&beta;-spirostan-3&beta;-ol3-o-&beta;-d-glucoside	C33H54O8									868828	119152	150988	512797	119640	407624	2.96846e+06	303871	1.07061e+06	901499	1.01834e+06	479282	789718	927351	1.57173e+06	632866	569083	666471	582129	560582	505978	655111	445798
neg-7.068_578.38141	578.381	7.068	(25s)-5&beta;-spirostan-3&beta;-ol3-o-&beta;-d-glucoside	C33H54O8									7.57206e+06	3.91077e+06	2.35878e+06	2.25129e+06	5.96207e+06	3.1965e+06	3.40961e+06	4.17123e+06	2.53941e+06	1.79144e+06	2.66658e+06	4.29432e+06	4.28328e+06	6.85167e+06	3.0026e+06	2.18277e+06	2.2995e+06	2.38732e+06	2.43963e+06	2.27919e+06	2.12656e+06	1.7592e+06	1.88547e+06
pos-4.236_416.32757	416.328	4.236	(25s)-5beta-spirostan-3beta-ol	C27H44O3	HMDB0030024	Lipids and lipid-like molecules	Prenol lipids	C03963					16348532	2.46966e+08	1.8524e+07	3.34145e+07	5.38666e+06	1.06574e+07	1.49025e+07	2.83756e+07	1278237462	3.74484e+07	1.07481e+08	1.46885e+07	1.34911e+08	4.4131e+07	1.76301e+07	2.54097e+07	1.09019e+08	1.09555e+08	110008458	1.16116e+08	9.53783e+07	1.02572e+08	9.89209e+07
pos-4.261_416.32744	416.327	4.261	(25s)-5beta-spirostan-3beta-ol	C27H44O3	HMDB0030024	Lipids and lipid-like molecules	Prenol lipids	C03963					16348532	2.46966e+08	1.8524e+07	3.34145e+07	5.72562e+06	1.06574e+07	1.49025e+07	2.83756e+07	119876266	3.74484e+07	1.07481e+08	1.46885e+07	1.34911e+08	4.4131e+07	1.76381e+07	2.54097e+07	1.09019e+08	1.09555e+08	110008458	1.16116e+08	9.53783e+07	1.02572e+08	9.89209e+07
neg-4.33_536.2615	536.261	4.33	(2alpha,3xi,5alpha,7beta,9alpha,10beta,13alpha)-2,7-dihydroxytaxa-4(20),11-diene-5,9,10,13-tetrayl tetraacetate	C24H36N6O8									1.12481e+06	342303	250634	1.66792e+06	3.00541e+06	1.35446e+06	231133	2.81457e+06	3.25506e+06	1.20018e+06	357400	1.36298e+06	1.2878e+06	8.87184e+06	1.66771e+06	1.27535e+06	930161	1.28046e+06	994572	929301	880348	1.09205e+06	1.05067e+06
pos-3.695_630.35785	630.358	3.695	peridinin	C39H50O7									469910	1.99754e+06	3.59537e+06	1.63729e+06	362279	356413	156569	643157	1.146e+06	2.13582e+06	942074	1.54369e+06	1.33084e+06	816114	578028	1.26604e+06	1.00578e+06	1.13584e+06	1.30085e+06	1.27189e+06	1.65453e+06	1.45979e+06	1.47815e+06
neg-1.365_316.0767	316.077	1.365	(2e)-2-(4-chlorophenyl)-3-phenyl-3-(2-pyridinyl)acrylonitrile	C20H13ClN2									352199	371148	519717	495844	7.36361e+06	2.83156e+06	1.87149e+06	5.47495e+06	194396	200964	476331	601184	597922	714745	139395	525237	469452	408168	500156	516510	720811	843585	465751
neg-1.855_316.0765	316.077	1.855	(2e)-2-(4-chlorophenyl)-3-phenyl-3-(2-pyridinyl)acrylonitrile	C20H13ClN2									3.56818e+07	2.80632e+06	8.9827e+06	4.66705e+06	8.28054e+06	3.74968e+07	1.94474e+07	5.82924e+06	1.86001e+07	1.8191e+07	1.93292e+07	1.74137e+07	3.32654e+07	1.91282e+07	1.30735e+07	7.03141e+06	1.65347e+07	1.18786e+07	1.35672e+07	1.08672e+07	1.26309e+07	1.24407e+07	1.40734e+07
pos-6.104_186.10388	186.104	6.104	(2e)-2-tridecene-4,6,8-triyn-1-ol	C13H14O									8.27422e+06	4.33213e+06	1.05253e+07	8.89528e+06	8.79206e+06	1.00192e+07	5.29361e+06	1.48325e+07	5.80674e+06	4.52113e+06	5.61661e+06	5.24262e+06	6.24697e+06	7.93714e+06	5.80534e+06	3.8703e+06	6.77629e+06	5.86002e+06	6.05428e+06	5.00789e+06	6.23833e+06	5.33712e+06	5.03093e+06
pos-6.223_186.10386	186.104	6.223	(2e)-2-tridecene-4,6,8-triyn-1-ol	C13H14O									7.71299e+06	1.09078e+07	2.10883e+07	2.70827e+07	1.25922e+07	1.7718e+07	2.50024e+06	2.14284e+07	1.00516e+07	1.06531e+07	1.45309e+07	12437705	9.24778e+06	1.03076e+07	6.74135e+06	5.74399e+06	1.20295e+07	1.12262e+07	1.09515e+07	1.01315e+07	9.80898e+06	9.05716e+06	9.69001e+06
pos-5.511_186.10392	186.104	5.511	(2e)-2-tridecene-4,6,8-triyn-1-ol	C13H14O									4.77305e+06	1.50851e+06	5.03978e+06	5.84177e+06	1.35939e+06	7.10487e+06	1.06453e+06	1.37428e+06	2.22546e+06	2.36579e+06	4.78477e+06	3.90127e+06	2.64253e+06	4.07852e+06	1.35857e+06	1.29258e+06	2.87184e+06	2.99335e+06	2.4323e+06	2.52183e+06	2.07643e+06	1.28514e+06	2.32873e+06
pos-5.589_186.10391	186.104	5.589	(2e)-2-tridecene-4,6,8-triyn-1-ol	C13H14O									3.37845e+06	2.17226e+06	7.23118e+06	8.47137e+06	1.38904e+06	6.82228e+06	1.28684e+06	2.27039e+06	2.33762e+06	2.11148e+06	5.34455e+06	3.53266e+06	3.36277e+06	2.32383e+06	1.85191e+06	2.41446e+06	2.97289e+06	2.70483e+06	2.52719e+06	2.04127e+06	1.88852e+06	1.81398e+06	2.91621e+06
pos-4.313_387.16965	387.17	4.313	(2e)-3-(3,4-dimethoxyphenyl)-n-[2-(3,4-dimethoxyphenyl)-2-hydroxyethyl]acrylamide	C21H25NO6									4.48729e+06	55564.4	71892.2	108480	395826	3.15473e+06	3.89686e+06	116773	66964.3	68839.9	104125	586386	210992	201689	108011	117665	365834	333523	283612	208938	407161	272395	365107
pos-3.326_387.16911	387.169	3.326	(2e)-3-(3,4-dimethoxyphenyl)-n-[2-(3,4-dimethoxyphenyl)-2-hydroxyethyl]acrylamide	C21H25NO6									187215	1.38161e+06	995186	752081	802604	359015	2.10402e+06	670247	3.22762e+06	5.26724e+06	2.19155e+06	250116	998220	1.43175e+06	2.35422e+06	779612	1.17158e+06	1.45594e+06	1.52361e+06	1.52716e+06	1.19963e+06	1.33298e+06	1.33063e+06
pos-9.839_194.02352	194.024	9.839	(2e)-3-(6-hydroxy-4-oxido-3-oxo-1,4-cyclohexadien-1-yl)acrylate	C10H2N4O									1.1487e+07	1.83555e+06	2.43071e+06	2.94445e+06	1.01068e+07	7.71404e+06	4.76851e+06	5.60192e+06	2.5121e+06	1.75334e+06	2.728e+06	3.48416e+06	4.09225e+06	4.38076e+06	2.06201e+07	2.23652e+06	3.84296e+06	3.27128e+06	3.14236e+06	3.48076e+06	2.55224e+06	2.17316e+06	2.21024e+06
pos-3.118_287.13576	287.136	3.118	(2e)-hexenedioylcarnitine	C13H21NO6									125939	919104	1.6582e+06	1.15984e+06	621328	523083	2.56671e+06	536448	1.45339e+06	4.69971e+06	1.95911e+06	1.67719e+06	782872	370040	665042	852390	1.50515e+06	1.53663e+06	1.38054e+06	1.25638e+06	1.25134e+06	1.37778e+06	1.53412e+06
pos-5.05_333.30195	333.302	5.05	(2e,4e,12z)-n-isobutyl-2,4,12-octadecatrienamide	C22H39NO									331637	299858	423738	157298	359181	334118	238928	224138	1.01786e+06	152137	137945	183840	1.53468e+06	2.75517e+06	5.34212e+06	2.43936e+06	892371	975956	1.20545e+06	998478	1.44673e+06	1.41493e+06	1.2062e+06
pos-3.997_311.20873	311.209	3.997	(2e,4z)-decadienoylcarnitine	C17H29NO4									1.89803e+06	222628	319030	523304	849119	2.07483e+06	1.74435e+06	1.09962e+06	274594	311706	4.72666e+06	226373	1.05686e+06	459377	672276	958420	874404	772208	860999	736443	699136	801497	675200
pos-4.391_311.20844	311.208	4.391	(2e,4z)-decadienoylcarnitine	C17H29NO4									335927	110105	116969	187016	379282	437340	274316	239032	121696	144647	180822	185723	258098	263536	211695	112813	1.16102e+06	1.12936e+06	1.01037e+06	956918	1.05819e+06	1.22951e+06	1.06115e+06
pos-5.072_266.18746	266.187	5.072	(2e_6e)-(10r_11s)-10_11-epoxy-3_7_11-trimethyltrideca-2_6-dienoicacid	C16H26O3									6.12312e+07	656652	2.10612e+06	608411	2.78119e+06	6.11714e+07	4.01602e+07	3.57969e+06	4.59954e+06	5.60053e+06	8.7558e+06	1.22818e+07	6.26073e+06	4.98913e+06	8.50279e+06	899070	7.03758e+06	6.7792e+06	7.41645e+06	7.1204e+06	6.68581e+06	6.02649e+06	5.60516e+06
pos-6.65_266.18746	266.187	6.65	(2e_6e)-(10r_11s)-10_11-epoxy-3_7_11-trimethyltrideca-2_6-dienoicacid	C16H26O3									678053	103947	353479	485578	197457	666110	646085	197791	318457	198404	151353	435682	4.31184e+06	3.88503e+06	3.0084e+06	3.525e+06	1.62856e+06	1.95493e+06	1.26188e+06	1.56585e+06	1.40587e+06	1.4618e+06	1.35907e+06
pos-0.712_202.06254	202.063	0.712	(2-naphthalenyloxy)acetic acid	C12H10O3	HMDB0032706	Benzenoids	Benzene and substituted derivatives	C18750					2.66681e+07	3.36212e+06	3.14516e+06	3.55982e+06	1.00674e+07	6.68874e+06	5.52991e+06	3.17742e+06	3.29936e+06	2.80529e+06	3.64898e+06	4.0644e+06	4.56582e+06	3.90369e+06	3.01861e+06	3.41548e+06	3.87588e+06	3.48023e+06	3.10424e+06	3.66748e+06	3.45137e+06	3.30439e+06	3.4455e+06
neg-7.829_492.3295	492.329	7.829	(2r)-1-(beta-d-galactopyranosyloxy)-3-hydroxy-2-propanyl palmitate	C22H40N10O3									50595	301385	4.25737e+06	3.84628e+06	98832.9	457068	40776.3	151997	337082	699931	208042	382803	112694	308002	470780	84022.6	480850	522429	465274	436514	511424	431170	405732
neg-7.707_492.3295	492.329	7.707	(2r)-1-(beta-d-galactopyranosyloxy)-3-hydroxy-2-propanyl palmitate	C26H44N4O5									73818.7	341281	5.40388e+06	5.1725e+06	83567.9	389122	74504	286917	434438	845782	254422	543013	119627	379827	547179	67656	618899	597280	533101	606462	647556	433283	442650
pos-4.702_904.69766	904.698	4.702	(2r)-2,3-bis(docosanoyloxy)propyl 2-(dimethylsulfonio)ethyl phosphate	C51H101O8PS									9.63262e+07	1.08088e+08	1.07298e+07	1.40464e+07	816537	1.66415e+07	1.45953e+08	4.44286e+07	7.04486e+07	4.08221e+07	8.92812e+06	3.08836e+07	6.07488e+07	5.71792e+07	2.91703e+07	8.48065e+07	4.59588e+07	4.6579e+07	5.79852e+07	3.37931e+07	5.13721e+07	4.70721e+07	4.12809e+07
neg-6.229_623.34054	623.341	6.229	phodia-pe	C29H54NO11P									4.71426e+06	4.00614e+06	1.09773e+06	2.06358e+06	8.13962e+06	2.76854e+06	1.23756e+06	4.40571e+06	1.91694e+06	1.66508e+06	3.73485e+06	3.22039e+06	6.03744e+06	1.07337e+07	8.1585e+06	1.55873e+07	4.53714e+06	4.94819e+06	6.38881e+06	6.21266e+06	5.91463e+06	4.82088e+06	5.32896e+06
neg-6.135_623.34052	623.341	6.135	phodia-pe	C29H54NO11P									1.70668e+06	2.10901e+06	453827	1.41725e+06	2.89909e+06	868919	194747	1.07079e+06	707175	636341	954990	949708	2.23037e+06	6.74545e+06	3.24701e+06	8.09304e+06	3.32628e+06	2.55382e+06	2.88683e+06	2.34068e+06	3.18302e+06	1.76981e+06	2.51185e+06
neg-5.598_621.32502	621.325	5.598	pkodia-pe	C29H52NO11P									2.71977e+06	797711	81831.9	1.39822e+06	662713	804406	781016	1.9893e+06	276378	804555	285503	244901	134214	434958	636146	1.92451e+06	311446	414975	431898	505062	441519	506087	354836
neg-5.684_619.34599	619.346	5.684	ohoha-pe	C30H54NO10P									958520	2.1e+06	2.7471e+06	1.88018e+06	845636	845782	1.07625e+06	554073	963930	1.6591e+06	1.06821e+06	1.49168e+06	277598	478700	1.1481e+06	780975	986920	935685	1.17485e+06	1.12452e+06	955324	980648	991410
pos-1.51_571.36819	571.368	1.51	(2r,4bs,6as,12bs,12cr,14as)-4b-hydroxy-2-(2-hydroxy-2-propanyl)-12b,12c-dimethyl-9,10-bis(3-methyl-2-buten-1-yl)-5,6,6a,7,12,12b,12c,13,14,14a-decahydro-2h-chromeno[5',6':6,7]indeno[1,2-b]indol-3(4bh)-one	C37H49NO4									689641	1.42552e+06	3.45462e+06	1.57897e+06	239649	224449	1.61133e+06	339695	2.57143e+06	7.48517e+06	2.63301e+06	1.6653e+06	716749	2.10304e+06	1.7633e+06	570820	1.80503e+06	1.8399e+06	1.3828e+06	1.65851e+06	1.75575e+06	1.72232e+06	1.78172e+06
neg-6.28_609.32954	609.33	6.28	phhdia-pe	C28H52NO11P									2.63004e+06	1.8803e+06	3.0671e+06	2.81326e+06	2.24882e+06	1.7326e+06	2.05425e+06	1.27573e+06	1.57384e+06	2.77272e+06	2.15742e+06	2.36941e+06	1.95105e+06	557610	5.29617e+06	609440	965285	1.03546e+06	1.37514e+06	1.44697e+06	1.81342e+06	1.50239e+06	1.09904e+06
pos-3.264_926.50897	926.509	3.264	(2r,8s)-5,8,11,11-tetrahydroxy-2-[(11z,14z)-11,14-icosadienoyloxy]-5,11-dioxido-4,6,10-trioxa-5lambda~5~,11lambda~5~-diphosphaundec-1-yl (4z,7z,10z,13z,16z,19z)-4,7,10,13,16,19-docosahexaenoate	C48H80O13P2									1.51146e+06	4.70723e+06	4.20127e+06	5.58395e+06	1.19764e+07	1.28006e+06	1.04338e+06	7.68539e+06	2.56045e+06	2.69182e+06	1.47096e+06	4.10378e+06	2.60176e+06	1.69907e+06	1.36808e+06	3.80331e+06	3.02791e+06	2.35701e+06	3.05744e+06	2.99476e+06	3.37171e+06	3.32833e+06	3.32676e+06
pos-0.866_162.05241	162.052	0.866	(2r_3s)-2_3-dimethylmalate	C6H10O5									4.80507e+07	1.37921e+08	1.13294e+08	1.48747e+08	1.89824e+08	2.62698e+08	2.28199e+07	1.24196e+08	6.25582e+07	5.73508e+07	4.6963e+07	1.14314e+08	5.19838e+07	113509211	9.55394e+07	7.01752e+07	6.93043e+07	6.96517e+07	6.49603e+07	7.01105e+07	7.79207e+07	6.08392e+07	7.37586e+07
neg-0.871_162.05239	162.052	0.871	(2r_3s)-2_3-dimethylmalate	C6H10O5									3.7913e+07	217011075	2.37984e+08	1.97871e+08	1.88134e+08	2.34093e+08	3.18332e+07	1.03759e+08	127521940	1.23113e+08	8.88338e+07	2.00238e+08	8.11742e+07	1.23644e+08	1.09456e+08	5.75176e+07	9.45524e+07	106437185	1.08156e+08	1.02792e+08	9.34122e+07	9.02253e+07	8.95024e+07
pos-3.49_609.32724	609.327	3.49	phhdia-pe	C28H52NO11P									229589	1.3268e+06	7.50947e+06	1.06754e+06	442834	142472	301670	220609	1.65791e+06	2.85515e+06	2.60227e+06	2.06826e+06	2.47785e+06	872461	466377	1.29238e+06	1.55785e+06	1.6407e+06	1.2121e+06	1.89902e+06	2.38586e+06	1.94861e+06	1.7344e+06
neg-5.797_609.32501	609.325	5.797	phhdia-pe	C28H52NO11P									8.81082e+07	2.27463e+07	2.99809e+07	3.06016e+07	1.71061e+08	7.98767e+07	4.9907e+07	7.12825e+07	3.15097e+07	3.56917e+07	2.60179e+07	5.51181e+07	5.34376e+07	6.54245e+06	9.89091e+06	1.77379e+07	3.13839e+07	2.84344e+07	2.73299e+07	3.73175e+07	2.85595e+07	2.95785e+07	2.34392e+07
neg-5.627_609.325	609.325	5.627	phhdia-pe	C28H52NO11P									2.9295e+07	1.88874e+07	6.1896e+06	8.7943e+06	6.11499e+07	2.19738e+07	2.01418e+07	3.37766e+07	2.52026e+07	1.33871e+07	2.51022e+07	2.24887e+07	1.2643e+07	1.78693e+07	1.49741e+07	1.9075e+07	1.66007e+07	1.39825e+07	1.51891e+07	1.5834e+07	1.24897e+07	1.34979e+07	1.47209e+07
pos-7.12_607.38371	607.384	7.12	pon-pe	C30H58NO9P									2.80634e+07	232461	466542	2.64529e+06	3.18885e+06	5.70199e+06	3.02738e+06	3.49415e+06	938448	414926	2.15848e+06	1.22414e+06	770506	2.47023e+06	867059	1.68237e+06	1.38951e+06	1.40127e+06	1.13724e+06	2.2266e+06	2.12873e+06	2.42593e+06	2.23524e+06
neg-3.463_291.04125	291.041	3.463	(2s)-2-amino-3-[4-hydroxy-3-(sulfooxy)phenyl]-2-methylpropanoic acid	C10H13NO7S	HMDB0142153	Organic acids and derivatives	Organic sulfuric acids and derivatives						57323.1	1.43184e+06	5.04737e+06	3.75473e+06	3.04125e+06	146104	114494	1.53943e+06	459049	1.39802e+06	113567	781051	89516.6	279758	270730	444690	564022	602670	614035	532296	437476	402533	362366
neg-4.3_329.07185	329.072	4.3	(2s,3r)-epoxiconazole	C17H13ClFN3O									572887	5.29401e+06	1.30797e+06	717642	1.21045e+06	4.86708e+06	2.78385e+07	1.07491e+07	230532	130696	167123	113790	5.11277e+06	3.89239e+06	4.60446e+06	1.63861e+06	2.20427e+06	2.09929e+06	2.96443e+06	2.13618e+06	2.21338e+06	2.16488e+06	2.42344e+06
pos-7.555_657.50139	657.501	7.555	(2s,3r,4e,8e)-3-hydroxy-2-[methyl(stearoyl)amino]-4,8-octadecadien-1-yl hydrogen sulfate	C37H71NO6S									2.64493e+07	4.54324e+06	5.30264e+06	5.99309e+06	2.83748e+07	2.37877e+07	7.74172e+06	1.23231e+07	5.52761e+06	5.61734e+06	6.5546e+06	6.49294e+06	8.87736e+06	7.89537e+06	4.66566e+06	3.5008e+06	5.41364e+06	6.86118e+06	5.7014e+06	6.0434e+06	5.95601e+06	4.38939e+06	4.227e+06
pos-3.302_694.33951	694.34	3.302	(2s,4as,6r,8as)-6-[2-(beta-d-glucopyranosyloxy)-2-propanyl]-8a-methyl-4-methylenedecahydro-2-naphthalenyl 6-o-[(2r,3r,4r)-3,4-dihydroxy-4-(hydroxymethyl)tetrahydro-2-furanyl]-beta-d-glucopyranoside	C32H54O16									1.31649e+06	3.04152e+07	1.58669e+07	1.81264e+07	4.51899e+06	4.07638e+06	1.70101e+07	6.58667e+06	3.2953e+07	4.39003e+07	2.80916e+07	1.23727e+07	1.62273e+07	1.90297e+07	2.88602e+07	2.77658e+07	1.82927e+07	1.85784e+07	1.50913e+07	1.44418e+07	2.07853e+07	2.32795e+07	2.1747e+07
neg-6.09_617.36889	617.369	6.09	(2s,4r,4as,4br,6as,8ar,11ar,15bs,15cs,17as)-4-hydroxy-2-(2-hydroxy-2-propanyl)-9,9,11,11,15b,15c-hexamethyl-12-oxo-3,4,5,6,6a,7,8,8a,9,11,11a,12,15,15b,15c,16,17,17a-octadecahydro-2h-[2]benzofuro[5,6-e]chromeno[5',6':6,7]indeno[1,2-b]indole-4a(4bh)-carbaldehyde	C38H51NO6									1.30171e+07	9.8823e+06	2.99872e+06	3.90346e+06	1.04239e+08	1.0283e+07	2.33561e+07	3.76229e+07	2.42937e+07	3.91082e+06	1.08445e+07	8.65645e+06	1.35193e+07	9.37691e+06	6.86452e+06	1.42763e+07	9.0708e+06	8.77013e+06	9.898e+06	1.05501e+07	8.76994e+06	8.62977e+06	9.37002e+06
neg-5.962_617.3689	617.369	5.962	(2s,4r,4as,4br,6as,8ar,11ar,15bs,15cs,17as)-4-hydroxy-2-(2-hydroxy-2-propanyl)-9,9,11,11,15b,15c-hexamethyl-12-oxo-3,4,5,6,6a,7,8,8a,9,11,11a,12,15,15b,15c,16,17,17a-octadecahydro-2h-[2]benzofuro[5,6-e]chromeno[5',6':6,7]indeno[1,2-b]indole-4a(4bh)-carbaldehyde	C38H51NO6									6.75811e+06	9.49945e+06	4.35808e+06	4.05223e+06	3.77088e+07	6.32349e+06	2.45564e+07	2.53962e+07	4.337e+07	4.18617e+06	5.74489e+06	7.07206e+06	6.11572e+06	6.30389e+06	4.89436e+06	8.59436e+06	9.76819e+06	8.7704e+06	8.58514e+06	9.94678e+06	9.19664e+06	8.48761e+06	8.21105e+06
pos-1.225_244.10527	244.105	1.225	(2s,4s)-pinnatanine	C10H16N2O5	HMDB0029439	Organic acids and derivatives	Carboxylic acids and derivatives						5.56502e+06	2.86138e+06	977703	2.82373e+06	2.12848e+07	1.42216e+06	1.43643e+06	4.38687e+06	2.29928e+06	1.34433e+06	916704	1.5701e+06	4.37319e+06	2.0207e+06	3.98371e+06	2.84166e+06	2.1377e+06	1.51782e+06	1.74903e+06	1.55295e+06	1.28324e+06	1.20834e+06	1.06219e+06
neg-0.897_244.10541	244.105	0.897	(2s,4s)-pinnatanine	C10H16N2O5	HMDB0029439	Organic acids and derivatives	Carboxylic acids and derivatives						1.68544e+06	1.08374e+06	796606	878061	2.94521e+06	724267	2.60276e+06	3.61533e+06	1.5946e+06	1.18974e+06	920107	885104	1.29067e+06	741890	1.13451e+06	1.77478e+06	1.18442e+06	1.28344e+06	899363	934632	1.09723e+06	1.13796e+06	955473
pos-0.892_244.10527	244.105	0.892	(2s,4s)-pinnatanine	C10H16N2O5	HMDB0029439	Organic acids and derivatives	Carboxylic acids and derivatives						8.2965e+07	2.66645e+07	1.96311e+07	2.04553e+07	126255439	3.77697e+07	3.95722e+07	8.62215e+07	3.76276e+07	2.49713e+07	3.23823e+07	2.70375e+07	3.69121e+07	2.38389e+07	3.27811e+07	170909035	2.49219e+07	2.82195e+07	3.12759e+07	3.12297e+07	3.21659e+07	3.16413e+07	3.27684e+07
pos-1.477_244.10546	244.105	1.477	(2s,4s)-pinnatanine	C10H16N2O5	HMDB0029439	Organic acids and derivatives	Carboxylic acids and derivatives						2.37255e+07	8.28966e+06	8.87187e+06	1.04989e+07	1.99071e+07	12426747	1.76058e+07	1.61494e+07	1.02912e+07	1.20133e+07	1.56866e+07	1.0346e+07	2.07588e+07	1.25756e+07	9.64443e+06	1.31719e+07	9.39857e+06	9.23502e+06	1.01992e+07	9.12918e+06	8.28503e+06	8.59712e+06	1.02713e+07
neg-3.722_570.37396	570.374	3.722	(2s,5r,7r,8r,9s)-2-{(2'r,3's,5r,5'r)-5'-[(2s,3s,5r,6r)-6-hydroxy-6-(hydroxymethyl)-3,5-dimethyltetrahydro-2h-pran-2-yl]-3'-methyloctahydro-2,2'-bifuran-5-yl}-7-[(2s)-1-methoxy-2-propanyl]-2,8-dimethyl-1,6-dioxaspiro[4.5]decan-9-ol	C31H54O9									23099.4	2.4858e+06	1.79507e+06	600660	146447	95385.3	1.2042e+06	365031	770006	1.91136e+06	573940	235734	962566	485197	520011	743624	735559	606735	706066	657704	628556	718189	843355
neg-0.906_206.04212	206.042	0.906	(2s_3r)-3-hydroxybutane-1_2_3-tricarboxylate	C7H10O7									8.09451e+07	2.62355e+07	6.40382e+07	2.15344e+08	6.69929e+07	6.03393e+07	4.54495e+07	4.25007e+07	6.86805e+07	3.75483e+07	1.0176e+08	8.02403e+07	3.94958e+07	5.88966e+07	1.67378e+07	3.18292e+07	5.15117e+07	5.88594e+07	5.09274e+07	5.07923e+07	5.09095e+07	5.25876e+07	5.34629e+07
neg-1.559_206.04212	206.042	1.559	(2s_3r)-3-hydroxybutane-1_2_3-tricarboxylate	C7H10O7									800151	5.75015e+06	4.59173e+06	2.27716e+06	954495	1.70375e+06	1.39905e+06	411816	1.93255e+06	4.32338e+06	3.10389e+06	2.37222e+06	1.19962e+06	461615	1.82674e+06	3.04002e+06	1.74209e+06	1.57406e+06	1.78931e+06	1.60817e+06	2.0252e+06	2.59052e+06	2.83431e+06
neg-4.348_332.18315	332.183	4.348	(2s_3s)-2-hydroxytridecane-1_2_3-tricarboxylate	C16H28O7									394271	608804	182005	395604	174756	535240	808449	1.20111e+06	138198	139741	147981	150578	1.06093e+06	1.5336e+06	1.54439e+06	851653	790508	799856	641783	943436	682129	815603	1.01379e+06
neg-5.58_607.34838	607.348	5.58	phooa-pe	C29H54NO10P									899113	6.54928e+06	550020	221191	5.71657e+06	1.63364e+06	1.24143e+06	3.92007e+06	2.0066e+06	1.11663e+06	1.7673e+06	1.85527e+06	2.19386e+06	1.16825e+06	1.00432e+06	6.17924e+06	1.51815e+06	1.48364e+06	1.68338e+06	1.75961e+06	1.61784e+06	1.56222e+06	1.62196e+06
pos-3.246_326.15376	326.154	3.246	(2z,4e,6z,8e,10z,12e,14e)-2,6,11,15-tetramethyl-2,4,6,8,10,12,14-hexadecaheptaenedioate										98626	1.13784e+06	2.12924e+06	215378	949045	573940	4.43548e+06	169637	415769	1.31723e+06	1.32994e+06	230840	707023	1.53904e+06	2.23568e+06	378844	534857	564123	589270	635818	566942	782651	446271
neg-0.825_155.02475	155.025	0.825	(3-aminopropoxy)sulfonic acid	C3H9NO4S	HMDB0140100	Organic acids and derivatives	Organic sulfuric acids and derivatives						2.67917e+06	2.00945e+06	1.59616e+06	1.2803e+06	2.46219e+06	1.38045e+06	588424	481744	2.49594e+06	3.4959e+06	1.77807e+06	3.69973e+06	2.0507e+06	1.2319e+06	1.42602e+06	1.66241e+06	1.74117e+06	1.68657e+06	1.82425e+06	1.68427e+06	1.71279e+06	1.58165e+06	1.88377e+06
neg-3.763_506.27426	506.274	3.763	(3b,9r)-5-megastigmene-3,9-diol 9-[apiosyl-(1->6)-glucoside]	C24H42O11	HMDB0038327	Lipids and lipid-like molecules	Fatty Acyls						38566.9	700507	1.81656e+06	580690	423232	38204.7	300621	781697	505406	896496	269750	296405	160252	371318	250028	632262	367413	432795	370687	321587	332156	398490	301634
neg-3.64_506.27433	506.274	3.64	(3b,9r)-5-megastigmene-3,9-diol 9-[apiosyl-(1->6)-glucoside]	C24H42O11	HMDB0038327	Lipids and lipid-like molecules	Fatty Acyls						70631	2.41041e+06	4.03721e+06	1.01201e+06	380890	82195.9	934599	330056	1.00766e+06	2.68814e+06	531463	816756	558537	814689	760716	946166	1.22763e+06	1.09747e+06	1.17301e+06	1.13884e+06	1.16238e+06	1.30425e+06	1.01813e+06
pos-3.642_960.49365	960.494	3.642	(3beta,12beta,16beta,21beta)-16,21,23-trihydroxy-30-oxo-12,13-epoxyoleanan-3-yl beta-d-glucopyranosyl-(1->2)-[beta-d-glucopyranosyl-(1->4)]-alpha-l-arabinopyranoside	C42H83N4O12P3S									91800.2	2.29411e+06	465673	661129	101502	87858.1	525845	222184	610487	3.19271e+06	348228	214326	633124	5.33443e+06	733176	118988	673214	692489	991407	945383	721056	937009	868402
neg-3.643_960.49532	960.495	3.643	(3beta,12beta,16beta,21beta)-16,21,23-trihydroxy-30-oxo-12,13-epoxyoleanan-3-yl beta-d-glucopyranosyl-(1->2)-[beta-d-glucopyranosyl-(1->4)]-alpha-l-arabinopyranoside	C43H79N8O8P3S									28900.1	2.17407e+06	167386	361984	35873.3	37140.4	394577	27560.8	256301	2.48952e+06	186069	172954	161637	3.77337e+06	213671	40615.4	535134	370212	634710	543942	585476	637192	678079
pos-6.039_505.33938	505.339	6.039	(3e,5s,6s,7s,9r,11e,13e,15s,16r)-16-ethyl-5,7,9,15-tetramethyl-2,10-dioxooxacyclohexadeca-3,11,13-trien-6-yl 3,4,6-trideoxy-3-(dimethylamino)-beta-d-xylo-hexopyranoside	C29H47NO6									1.79817e+07	5.58588e+06	1.25669e+07	1.1228e+07	1.22033e+07	1.95484e+07	1.03275e+07	6.30423e+06	7.54998e+06	1.09564e+07	1.19475e+07	1.13835e+07	1.133e+07	2.42434e+07	1.66652e+07	8.0438e+06	1.76536e+07	1.78751e+07	1.76986e+07	1.46057e+07	1.40073e+07	1.14491e+07	1.1481e+07
pos-6.899_146.10913	146.109	6.899	(3-methyl-2-butenyl)-benzene	C11H14	HMDB0061808	Benzenoids	Benzene and substituted derivatives						201790	101712	692244	576562	1.29215e+06	1.37523e+06	896373	979404	485953	159736	639268	310173	310668	624945	1.09808e+06	363226	516009	527120	337697	411249	352070	356583	224944
pos-4.723_146.1091	146.109	4.723	(3-methyl-2-butenyl)-benzene	C11H14	HMDB0061808	Benzenoids	Benzene and substituted derivatives						3.0962e+07	1.50859e+07	5.93486e+06	8.3405e+06	9.79497e+06	1.2617e+07	4.98766e+07	1.99131e+07	1.92691e+07	1.60038e+07	5.71531e+06	1.46527e+07	2.39238e+07	2.23294e+07	1.59572e+07	1.53284e+07	1.97517e+07	2.04105e+07	1.83859e+07	2.18512e+07	2.03246e+07	1.81339e+07	1.86352e+07
pos-4.6_146.10906	146.109	4.6	(3-methyl-2-butenyl)-benzene	C11H14	HMDB0061808	Benzenoids	Benzene and substituted derivatives						3.0962e+07	1.50859e+07	1.78996e+06	7.87025e+06	9.79497e+06	4.81564e+06	4.98766e+07	1.99131e+07	1.92691e+07	1.60038e+07	1.10775e+06	1.46527e+07	2.39238e+07	2.23294e+07	1.59572e+07	1.53284e+07	1.97517e+07	2.04105e+07	1.83859e+07	2.18512e+07	2.03246e+07	1.81339e+07	1.86352e+07
pos-7.602_146.10906	146.109	7.602	(3-methyl-2-butenyl)-benzene	C11H14	HMDB0061808	Benzenoids	Benzene and substituted derivatives						3.81553e+06	1.79815e+06	4.57207e+06	3.48831e+06	3.35681e+06	2.29881e+06	3.53409e+06	1.85771e+06	1.6742e+06	2.71157e+06	1.96801e+06	1.41315e+06	1.33481e+06	2.9396e+06	4.47535e+06	2.16623e+06	3.8866e+06	3.79554e+06	2.60645e+06	3.81243e+06	2.56198e+06	2.21773e+06	2.45138e+06
pos-6.226_146.10914	146.109	6.226	(3-methyl-2-butenyl)-benzene	C11H14	HMDB0061808	Benzenoids	Benzene and substituted derivatives						2.07811e+06	2.09472e+06	2.49713e+06	8.72203e+06	1.43774e+06	3.55248e+06	2.755e+06	4.45941e+06	1.19553e+06	2.371e+06	4.51894e+06	1.66407e+06	1.33072e+06	2.96953e+06	952004	895018	1.66004e+06	1.63593e+06	1.77774e+06	1.21597e+06	1.34903e+06	1.22817e+06	1.12774e+06
pos-6.105_146.10911	146.109	6.105	(3-methyl-2-butenyl)-benzene	C11H14	HMDB0061808	Benzenoids	Benzene and substituted derivatives						6.12238e+06	3.48341e+06	5.7103e+06	7.04937e+06	1.7559e+06	6.11502e+06	1.41818e+06	6.33455e+06	3.19845e+06	4.05684e+06	4.841e+06	3.7842e+06	3.96211e+06	4.7316e+06	4.26558e+06	2.65408e+06	4.27606e+06	4.43153e+06	3.27812e+06	2.79105e+06	3.53621e+06	4.01629e+06	2.30009e+06
pos-0.84_131.09432	131.094	0.84	(3r)-beta-leucine	C6H13NO2	HMDB0003640	Organic acids and derivatives	Carboxylic acids and derivatives	C02486					5.14402e+06	2.10959e+06	4.08867e+06	4.64714e+06	2.47678e+07	1.41519e+07	1.81498e+07	1.9986e+07	9.17783e+06	4.79698e+06	7.66042e+06	1.25821e+07	1.28457e+07	1.97041e+07	7.68265e+06	1.4156e+07	9.87758e+06	1.03222e+07	1.08775e+07	9.32871e+06	9.85124e+06	1.08445e+07	1.31621e+07
pos-3.274_146.10562	146.106	3.274	(3s)-3_6-diaminohexanoate	C6H14N2O2									6.38274e+06	5.84203e+06	8.16996e+06	3.21145e+06	1.59829e+06	2.18385e+06	4.13716e+06	4.63694e+06	4.79525e+06	8.22522e+06	5.24434e+06	8.63077e+06	2.80537e+06	2.3109e+06	4.26078e+06	5.26098e+06	4.12372e+06	4.07994e+06	3.74245e+06	4.1156e+06	6.82132e+06	5.02312e+06	5.08608e+06
neg-4.059_390.22525	390.225	4.059	(3s,5r,6s,7e,9x)-7-megastigmene-3,6,9-triol 9-glucoside	C19H34O8	HMDB0041176	Lipids and lipid-like molecules	Fatty Acyls						1.1223e+07	5.66549e+06	3.68367e+06	6.24636e+06	7.01685e+06	7.70925e+06	1.39775e+07	9.91707e+06	7.02776e+06	6.19128e+06	1.88236e+07	3.72733e+06	1.32811e+07	1.00287e+07	1.7679e+07	1.66491e+07	7.98917e+06	7.63892e+06	7.37644e+06	1.15769e+07	8.79971e+06	9.03353e+06	8.50489e+06
neg-5.024_390.22532	390.225	5.024	(3s,5r,6s,7e,9x)-7-megastigmene-3,6,9-triol 9-glucoside	C19H34O8	HMDB0041176	Lipids and lipid-like molecules	Fatty Acyls						375156	47910.9	54717.6	59488.3	51573.6	56149.7	70485.4	57036	58248.9	52844.9	52347.8	58579.2	58311.3	175897	275654	37154.3	577552	516819	578484	515827	534502	506010	497134
pos-3.559_436.23213	436.232	3.559	(3s,9s,14ar)-3,6-dimethyl-9-{6-[(2s)-2-oxiranyl]-6-oxohexyl}decahydropyrrolo[1,2-a][1,4,7,10]tetraazacyclododecine-1,4,7,10-tetrone	C21H32N4O6									825844	2.36298e+06	4.74505e+06	2.98364e+06	2.13552e+06	762287	2.0245e+06	2.33698e+06	5.54473e+06	7.67974e+06	3.47425e+06	3.41473e+06	2.09219e+06	1.76775e+06	4.48407e+06	4.30549e+06	3.97728e+06	3.08473e+06	4.77089e+06	3.35909e+06	4.28924e+06	3.77503e+06	4.38931e+06
neg-4.511_346.19876	346.199	4.511	(3s_4s)-3-hydroxytetradecane-1_3_4-tricarboxylate	C17H30O7									4.70694e+06	3.74703e+06	1.7745e+06	1.4815e+06	1.54172e+06	1.66744e+06	7.31314e+06	8.27179e+06	1.68505e+06	2.76819e+06	2.70252e+06	2.06008e+06	3.9606e+06	5.87844e+06	6.79592e+06	3.03152e+06	3.18385e+06	4.0294e+06	4.39803e+06	4.16506e+06	5.12136e+06	4.59513e+06	5.38434e+06
neg-4.614_584.26301	584.263	4.614	(3z)-phytochromobilin	C33H36N4O6				C05913	Metabolism|Metabolism	Metabolism of cofactors and vitamins|Global and overview maps	Porphyrin and chlorophyll metabolism|Biosynthesis of secondary metabolites	map00860|map01110	851361	956194	1.10575e+06	923013	45057.3	38419.1	354084	166276	686026	1.25879e+06	564284	850950	1.50279e+06	1.75767e+06	498967	1.27463e+06	1.44549e+06	965224	1.05342e+06	1.13989e+06	1.03952e+06	1.06994e+06	1.01447e+06
pos-3.275_335.20075	335.201	3.275	(4-aminophenyl)(7-benzyl-3,7-diazabicyclo[3.3.1]non-3-yl)methanone	C21H25N3O									557724	1.54874e+06	1.55459e+06	1.11833e+06	971489	185823	1.93061e+06	1.26347e+06	1.85061e+06	1.31882e+06	968416	1.16939e+06	1.34986e+06	1.02994e+06	984555	1.18725e+06	748671	1.13678e+06	1.13397e+06	734754	1.21652e+06	957548	1.0817e+06
neg-3.582_487.26431	487.264	3.582	(4-anilino-1-naphthyl){bis[4-(dimethylamino)phenyl]}methanol	C22H41N5O3S2									1.04759e+06	9.6874e+06	5.30927e+06	1.96885e+06	879155	488472	5.10223e+06	3.55606e+06	3.47365e+06	6.49558e+06	4.98298e+06	5.28567e+06	1.997e+06	1.77634e+06	3.05714e+06	2.33264e+06	2.47201e+06	2.83544e+06	3.02439e+06	2.56812e+06	2.58282e+06	2.55051e+06	3.00019e+06
neg-3.424_487.26437	487.264	3.424	(4-anilino-1-naphthyl){bis[4-(dimethylamino)phenyl]}methanol	C15H38N9O7P									423533	1.76701e+07	1.77369e+07	8.93396e+06	4.15705e+06	531680	8.42396e+06	1.02999e+07	1.40716e+07	1.84714e+07	1.15571e+07	6.23154e+06	8.15915e+06	5.54447e+06	1.2424e+07	1.90188e+07	1.16482e+07	1.10822e+07	9.53731e+06	1.1466e+07	1.08055e+07	1.13263e+07	1.00138e+07
neg-1.369_128.04701	128.047	1.369	(4e)-2-oxohexenoicacid	C6H8O3									799369	2.19025e+06	2.35319e+06	1.81625e+06	9.72819e+06	2.28798e+06	2.36228e+06	8.78606e+06	1.25946e+06	1.32868e+06	1.22045e+06	1.56248e+06	2.24496e+06	1.17705e+06	791413	2.50436e+06	1.89596e+06	1.4346e+06	1.84529e+06	1.64665e+06	1.6525e+06	1.80668e+06	1.74222e+06
pos-2.429_128.04719	128.047	2.429	(4e)-2-oxohexenoicacid	C6H8O3									1.74017e+07	2.36944e+06	3.73964e+06	3.80137e+07	8.21922e+06	5.717e+07	9.45346e+06	3.69266e+06	9.90054e+06	7.68888e+06	1.57494e+07	2.15134e+07	2.09837e+07	1.3094e+07	5.32775e+06	2.82058e+06	7.93693e+06	9.15623e+06	6.59235e+06	6.23975e+06	8.45221e+06	8.82552e+06	9.61888e+06
pos-5.541_128.04704	128.047	5.541	(4e)-2-oxohexenoicacid	C6H8O3									1.28054e+06	818393	1.7683e+06	3.66689e+06	1.70194e+06	2.55616e+06	1.20387e+06	951728	896848	1.02846e+06	2.41972e+06	1.12506e+06	1.01707e+06	924275	399030	648080	777434	1.25587e+06	715539	1.08434e+06	782860	856830	794924
neg-3.153_319.01698	319.017	3.153	(4e)-4-[(3,5-dichloro-4-hydroxyphenyl)imino]-3,4-dihydro-1(2h)-naphthalenone	C16H11Cl2NO2									5.47231e+06	2.39822e+06	1.66722e+06	1.89645e+06	5.52112e+06	4.25145e+06	4.08559e+06	3.91691e+06	3.4545e+06	2.38557e+06	2.80785e+06	3.08158e+06	2.83504e+06	2.05811e+06	2.39952e+06	2.38863e+06	2.09189e+06	2.03146e+06	2.17791e+06	1.99437e+06	1.90424e+06	2.03512e+06	2.17546e+06
neg-3.36_358.08722	358.087	3.36	(4e,6e)-3-oxo-1,7-diphenyl-4,6-heptadien-1-yl hydrogen sulfate	C19H18O5S									483289	1.06139e+06	2.55142e+06	5.13965e+06	3.35114e+07	218949	70273.3	11724960	35434.9	40381	34462.1	68405.5	105820	23647.1	29674.4	3.27663e+06	1.74478e+06	1.6536e+06	1.54399e+06	1.39622e+06	1.60681e+06	1.84098e+06	1.69408e+06
neg-3.257_358.08687	358.087	3.257	(4e,6e)-3-oxo-1,7-diphenyl-4,6-heptadien-1-yl hydrogen sulfate	C19H18O5S									111485	214261	155431	673530	1.80539e+06	164249	1.36707e+06	657072	596706	114201	167711	25950.9	41520.5	395577	491439	1.5791e+06	320681	278517	336928	319008	336562	342572	348552
pos-4.841_241.20334	241.203	4.841	(4e,6e,d14:2) sphingosine	C14H27NO2									1.63814e+07	1.9942e+06	1.96641e+06	2.99063e+06	2.60583e+07	1.45703e+07	1.09929e+07	4.75171e+06	3.38212e+06	2.09242e+06	4.10479e+06	3.70959e+06	4.78158e+06	3.62274e+06	3.24328e+06	1.90843e+06	8.17763e+06	8.27621e+06	8.06105e+06	8.25317e+06	8.41005e+06	7.12365e+06	7.6199e+06
pos-5.311_220.18184	220.182	5.311	(4r)-albaflavenol	C15H24O									2.75243e+06	1.87198e+06	1.75e+06	4.6224e+06	2.51509e+06	7.37635e+06	4.15497e+06	6.38013e+06	2.46431e+06	2.80107e+06	3.95563e+06	3.98458e+06	957088	1.6429e+06	1.55575e+06	1.56832e+06	2.75544e+06	2.42051e+06	2.22192e+06	1.82138e+06	2.74083e+06	1.65781e+06	2.03982e+06
pos-4.736_220.18211	220.182	4.736	(4r)-albaflavenol	C15H24O									9.88281e+06	9.76447e+06	2.48003e+07	3.38894e+07	1.10695e+07	4.73933e+07	4.86209e+06	2.27804e+07	1.56042e+07	1.02482e+07	2.2908e+07	2.21994e+07	1.05173e+07	1.25208e+07	1.03549e+07	5.84483e+06	1.79199e+07	1.46953e+07	1.5429e+07	1.18086e+07	1.06584e+07	9.89134e+06	8.51439e+06
pos-5.681_220.18205	220.182	5.681	(4r)-albaflavenol	C15H24O									242935	600601	491899	2.41197e+06	750235	704668	159363	243351	346694	204408	588118	450891	151737	174317	392829	109860	387361	296056	304190	285951	297053	178307	229868
neg-4.139_176.03166	176.032	4.139	(4s)-4_6-dihydroxy-2_5-dioxohexanoate	C6H8O6									428261	100686	52135.1	86112.8	150595	204140	6.90446e+06	756248	167392	94676.3	137366	73011.9	568746	611385	831775	261672	384438	310436	353558	409836	335564	279029	371735
neg-0.905_176.03161	176.032	0.905	(4s)-4_6-dihydroxy-2_5-dioxohexanoate	C6H8O6									7.32631e+07	1.9538e+07	2.57443e+07	4.53828e+07	5.35467e+07	3.16731e+07	2.08913e+07	2.57762e+07	4.16267e+07	2.43821e+07	6.25872e+07	3.36962e+07	37400830	2.44938e+07	1.90859e+07	2.6579e+07	2.87195e+07	2.80949e+07	2.34194e+07	2.40185e+07	2.4548e+07	2.45876e+07	2.40987e+07
neg-6.4_607.34566	607.346	6.4	phooa-pe	C29H54NO10P									968729	244791	693743	741878	310626	1.14035e+06	171376	122111	255080	416178	411264	441890	441739	740527	559032	1.00745e+06	869161	578824	817409	729184	545885	636945	604440
neg-6.378_367.27151	367.272	6.378	(5z,8z)-tetradecadienoylcarnitine	C21H37NO4									425397	736838	813742	2.0624e+06	1.2154e+06	1.27482e+06	1.02092e+06	2.38353e+06	1.05153e+06	720657	1.06657e+06	392311	831525	487029	437921	1.44867e+06	764786	792611	754999	706009	663658	739253	716459
pos-4.384_367.27107	367.271	4.384	(5z,8z)-tetradecadienoylcarnitine	C21H37NO4									2.61978e+07	3.47914e+06	4.06615e+06	2.65458e+06	7.8698e+06	1.06161e+07	7.86462e+06	8.64448e+06	5.0114e+06	1.08602e+07	1.17402e+07	8.82745e+06	1.59615e+07	7.54335e+06	5.63384e+06	1.14983e+07	1.21116e+07	1.19833e+07	1.2727e+07	1.2814e+07	1.3307e+07	1.50626e+07	1.38077e+07
neg-5.237_350.20908	350.209	5.237	(5z_13e)-6_9alpha-epoxy-11alpha-hydroxy-15-oxoprosta-5_13-dienoate	C20H30O5									1.1095e+07	1.55168e+06	4.53133e+06	9.05049e+06	1.14156e+06	2.1149e+07	1.27589e+07	932487	1.49227e+06	2.672e+06	3.99258e+06	3.23403e+06	2.58318e+06	3.07424e+06	3.44392e+06	842029	2.69555e+06	2.43351e+06	2.6986e+06	3.06609e+06	3.0669e+06	3.10941e+06	3.12591e+06
pos-4.056_350.20833	350.208	4.056	(5z_13e)-6_9alpha-epoxy-11alpha-hydroxy-15-oxoprosta-5_13-dienoate	C20H30O5									7.05534e+06	3.76105e+06	6.45218e+06	8.88522e+06	2.89491e+06	4.42275e+06	3.01506e+06	1.47136e+07	4.11563e+06	1.41934e+06	5.95715e+06	3.81451e+06	3.09549e+06	4.91189e+06	2.69466e+06	3.32967e+06	1.81997e+06	2.24679e+06	2.00128e+06	3.09054e+06	3.01329e+06	1.98362e+06	3.83612e+06
pos-4.902_350.20818	350.208	4.902	(5z_13e)-6_9alpha-epoxy-11alpha-hydroxy-15-oxoprosta-5_13-dienoate	C20H30O5									4.43255e+06	8.72322e+06	2.9881e+06	6.86916e+06	1.99451e+06	4.15278e+06	9.68416e+06	2.04755e+06	9.27504e+06	7.39841e+06	7.66847e+06	5.81937e+06	1.75532e+06	1.99555e+06	3.91013e+06	2.10882e+06	5.6091e+06	5.34295e+06	5.12938e+06	4.80021e+06	4.14689e+06	3.42978e+06	3.59433e+06
neg-4.695_350.20911	350.209	4.695	(5z_13e)-6_9alpha-epoxy-11alpha-hydroxy-15-oxoprosta-5_13-dienoate	C20H30O5									1.3798e+07	3.91038e+06	1.63546e+07	2.47293e+07	1.35272e+06	1.68583e+07	7.57139e+06	3.04071e+06	3.86504e+06	1.66461e+06	1.07277e+07	8.5114e+06	9.12444e+06	1.06127e+07	2.51374e+06	4.10304e+06	4.63317e+06	3.24755e+06	3.4128e+06	3.38824e+06	4.84884e+06	4.61518e+06	5.02709e+06
neg-5.395_350.20909	350.209	5.395	(5z_13e)-6_9alpha-epoxy-11alpha-hydroxy-15-oxoprosta-5_13-dienoate	C20H30O5									413033	130120	691271	2.66967e+06	185166	247700	319407	490593	255055	226395	756636	352936	186931	252463	110177	154463	275693	245110	198132	353111	227726	281181	191717
pos-3.993_336.22903	336.229	3.993	(5z_9e_14z)-(8xi_11r_12s)-11_12-epoxy-8-hydroxyicosa-5_9_14-trienoicacid	C20H32O4									5.08648e+06	662597	2.21055e+06	3.62293e+06	6.36962e+06	4.14944e+06	2.18923e+06	2.39598e+06	489925	384462	745915	801250	834857	1.24993e+06	348372	3.78978e+06	1.02472e+06	1.05137e+06	1.16134e+06	1.22071e+06	1.42089e+06	1.09568e+06	1.13163e+06
neg-5.193_336.22981	336.23	5.193	(5z_9e_14z)-(8xi_11r_12s)-11_12-epoxy-8-hydroxyicosa-5_9_14-trienoicacid	C20H32O4									1.13955e+07	3.0714e+07	2.69646e+07	5.54446e+07	2.19199e+07	2.41679e+07	8.77701e+06	7.86848e+07	3.04491e+07	1.79482e+07	2.03774e+07	2.19948e+07	7.42055e+06	1.42888e+07	9.67714e+06	1.11088e+07	1.76306e+07	1.74124e+07	1.84057e+07	1.70935e+07	1.75199e+07	1.64863e+07	1.68777e+07
pos-5.469_336.22879	336.229	5.469	(5z_9e_14z)-(8xi_11r_12s)-11_12-epoxy-8-hydroxyicosa-5_9_14-trienoicacid	C20H32O4									2.09463e+07	1.09514e+06	4.82611e+07	3.34851e+07	8.78259e+06	3.16097e+07	1.79883e+07	2.79715e+07	3.23505e+06	4.84838e+06	1.46202e+07	8.42893e+06	1.49587e+06	1.02848e+07	3.71779e+06	1.34041e+06	7.93008e+06	1.01135e+07	9.22223e+06	8.30419e+06	7.14134e+06	4.4648e+06	6.40837e+06
neg-5.686_336.22951	336.23	5.686	(5z_9e_14z)-(8xi_11r_12s)-11_12-epoxy-8-hydroxyicosa-5_9_14-trienoicacid	C20H32O4									2.44707e+08	1.01827e+08	3.5539e+08	3.31354e+08	1.57363e+08	2.25863e+08	1.95476e+08	1.92374e+08	1.75489e+08	1.1697e+08	2.34356e+08	1.52829e+08	1.31672e+08	363565826	1.45457e+08	1.42217e+08	1.32707e+08	1.46149e+08	1.71215e+08	1.52375e+08	1.51271e+08	1.34193e+08	1.35826e+08
pos-4.298_336.22886	336.229	4.298	(5z_9e_14z)-(8xi_11r_12s)-11_12-epoxy-8-hydroxyicosa-5_9_14-trienoicacid	C20H32O4									2.33452e+06	185957	920466	2.09196e+06	542610	494428	2.29024e+06	364125	936091	1.25565e+06	812467	2.81304e+06	2.53696e+06	824290	489414	592114	538506	524225	513586	502762	585267	473145	518974
neg-5.57_336.22954	336.23	5.57	(5z_9e_14z)-(8xi_11r_12s)-11_12-epoxy-8-hydroxyicosa-5_9_14-trienoicacid	C20H32O4									1.73731e+08	1.77883e+08	599864894	7.57909e+08	1.53746e+08	4.78701e+08	1.4633e+08	3.19436e+08	3.06584e+08	2.56624e+08	5.41297e+08	3.87406e+08	1.08159e+08	1.91743e+08	1.08658e+08	109738169	1.98978e+08	2.03515e+08	2.17843e+08	2.13421e+08	217626105	2.10771e+08	2.01551e+08
neg-6.388_336.22955	336.23	6.388	(5z_9e_14z)-(8xi_11r_12s)-11_12-epoxy-8-hydroxyicosa-5_9_14-trienoicacid	C20H32O4									269487	456842	1.54426e+06	2.15977e+06	522626	290217	169434	142617	310469	128540	741438	414722	218800	218993	154369	186809	302258	322081	372204	326612	366869	218965	297714
pos-5.467_354.23958	354.24	5.467	(5z_9e_14z)-(8xi_11xi_12s)-8_11_12-trihydroxyicosa-5_9_14-trienoate	C20H34O5									1.01637e+06	470267	4.41622e+06	568713	1.14044e+06	820693	704858	732395	465534	487645	437267	1.36999e+06	628484	1.91451e+06	1.13146e+06	448909	507029	720674	656035	392914	634815	612894	555738
pos-0.826_272.06727	272.067	0.826	(6as_11as)-3_6a_9-trihydroxypterocarpan	C15H12O5									2.81767e+07	9.2794e+06	4.87913e+06	1.08803e+07	3.35527e+07	1.76001e+07	1.58852e+07	1.09972e+07	1.13394e+07	6.44226e+06	1.16182e+07	1.41909e+07	1.74927e+07	1.00993e+07	9.45714e+06	9.58857e+06	8.76688e+06	9.44708e+06	8.35236e+06	9.98114e+06	9.1352e+06	8.88767e+06	8.14771e+06
neg-5.129_414.17086	414.171	5.129	(6beta,13alpha)-9-hydroxy-18-oxo-6,18-epoxypimar-7-en-16-yl hydrogen sulfate	C20H30O7S									639223	843548	995887	1.72827e+06	146447	342327	230234	128907	272862	523030	306297	454139	1.04589e+06	405464	647767	759817	580055	524254	583492	552300	578207	537222	492303
pos-4.901_480.28955	480.29	4.901	(6r)-1alpha,25-dihydroxyvitamin d3 6,19-sulfur dioxide adduct / (6r)-1alpha,25-dihydroxycholecalciferol 6,19-sulfur dioxide adduct	C27H44O5S									987610	3.36929e+06	570975	376042	947523	733748	3.53667e+06	560568	3.61023e+07	612444	6.97635e+06	609658	1.19793e+06	1.06739e+06	498462	500750	1.25954e+06	1.32868e+06	1.36527e+06	2.1902e+06	1.95164e+06	1.84157e+06	1.52358e+06
neg-6.192_468.30415	468.304	6.192	(6rs)-6,19-epidioxy-24,24-difluoro-25-hydroxy-6,19-dihydrovitamin d3 / (6rs)-6,19-epidioxy-24,24-difluoro-25-hydroxy-6,19-dihydrocholecalciferol	C27H42F2O4									1.30542e+07	1.35607e+07	8.48648e+06	1.10122e+07	5.85164e+06	5.7398e+06	2.79857e+06	4.07071e+06	3.49657e+06	8.08809e+06	1.01073e+07	1.05888e+07	2.03431e+07	2.10282e+07	2.17308e+07	2.36316e+07	9.38529e+06	1.06917e+07	1.04483e+07	1.03374e+07	1.03586e+07	8.94243e+06	1.01078e+07
pos-6.191_468.30358	468.304	6.191	(6rs)-6,19-epidioxy-24,24-difluoro-25-hydroxy-6,19-dihydrovitamin d3 / (6rs)-6,19-epidioxy-24,24-difluoro-25-hydroxy-6,19-dihydrocholecalciferol	C27H42F2O4									3.09654e+07	2.34135e+07	2.8687e+07	2.07712e+07	9.96895e+06	1.42565e+07	5.04635e+06	9.66899e+06	1.07626e+07	1.30147e+07	1.75958e+07	1.77961e+07	3.92147e+07	5.53379e+07	5.25735e+07	3.83037e+07	2.7875e+07	2.25863e+07	2.31315e+07	1.88368e+07	1.90291e+07	1.68911e+07	1.64165e+07
pos-8.539_282.25503	282.255	8.539	(6z)-octadecenoicacid	C18H34O2									9.17279e+06	6.666e+06	1.37472e+07	1.6899e+07	4.95777e+06	13156241	1.00294e+07	9.33067e+06	7.76324e+06	1.42034e+07	1.09801e+07	9.34308e+06	6.14072e+06	6.18274e+06	9.99018e+06	6.11167e+06	6.70865e+06	1.23218e+07	9.48954e+06	9.67356e+06	8.56106e+06	7.82473e+06	7.89253e+06
neg-5.031_466.21718	466.217	5.031	(6卯卤,11卯虏)-6,9-difluoro-11,21-dihydroxy-17-(1-oxobutoxy)pregna-1,4-diene-3,20-dione	C25H32F2O6									3.4195e+06	554070	394476	406173	319628	1.12205e+06	691234	619535	1.38621e+06	1.21513e+06	1.1049e+06	994166	693618	717040	811438	368535	2.55819e+06	2.60042e+06	2.86117e+06	2.15346e+06	2.75063e+06	2.15644e+06	1.82379e+06
pos-3.443_510.31652	510.317	3.443	(7r)-4-hydroxy-n,n,n-trimethyl-7-(octanoyloxy)-10-oxo-3,5,9-trioxa-4-phosphaheptadecan-1-aminium 4-oxide	C24H49NO8P									1.14514e+06	2.3467e+06	6.53552e+06	5.44998e+06	8.09355e+06	3.42843e+06	1.64539e+06	1.57606e+07	4.72076e+06	5.65547e+06	4.81674e+06	4.4309e+06	6.72969e+06	5.29424e+06	6.56212e+06	3.7528e+06	3.65602e+06	5.07097e+06	3.81052e+06	4.66303e+06	3.69361e+06	3.17019e+06	3.68955e+06
neg-6.008_535.22033	535.22	6.008	(7s)-7-{[(2s)-9-hydroxy-2-isobutyl-3-oxo-2,3,9,9a-tetrahydro-1h-imidazo[1,2-a]indol-9-yl]methyl}-6,7-dihydroquinazolino[3,2-a][1,4]benzodiazepine-5,13-dione	C31H29N5O4									1.2494e+07	1.46463e+07	5.75073e+07	2.94135e+07	7.07636e+06	6.50951e+06	6.71248e+06	6.09095e+06	5.52439e+06	1.88787e+07	8.91848e+06	1.36161e+07	8.51093e+06	1.043e+07	1.84587e+07	6.48739e+06	1.11395e+07	1.15397e+07	1.07576e+07	1.07177e+07	9.49221e+06	1.018e+07	1.02543e+07
pos-4.564_312.22904	312.229	4.564	(7s_8s)-dihode	C18H32O4									8.23037e+06	1.61941e+06	3.62125e+06	5.57593e+06	472456	2.73012e+06	866822	1.86302e+06	1.0813e+06	849910	1.34304e+06	1.87591e+06	1.05855e+06	4.87078e+06	427825	1.11437e+06	1.31477e+06	1.83149e+06	1.54867e+06	1.47618e+06	1.43449e+06	1.42891e+06	1.3477e+06
neg-5.164_312.22972	312.23	5.164	(7s_8s)-dihode	C18H32O4									1.28351e+07	1.69269e+06	6.43765e+06	1.39336e+07	400870	4.82287e+06	994058	4.40304e+06	2.63035e+06	1.55456e+06	5.24678e+06	3.45426e+06	1.31537e+06	3.65103e+06	810005	782918	2.29909e+06	2.23917e+06	2.5122e+06	2.56404e+06	3.39763e+06	2.34654e+06	2.33752e+06
pos-5.278_475.36476	475.365	5.278	(7z,10z,13z,16z)-docosatetraenoylcarnitine	C29H49NO4									3.27041e+07	3.67746e+07	4.49197e+07	3.56229e+07	2.84187e+07	2.7318e+07	2.54489e+07	2.5286e+07	1.64247e+07	2.70567e+07	3.30131e+07	3.92177e+07	3.67955e+07	9.34808e+07	7.99459e+07	4.76149e+07	3.98834e+07	4.23713e+07	4.39797e+07	4.55617e+07	3.87592e+07	4.35427e+07	4.2191e+07
pos-3.346_872.46056	872.461	3.346	(7z,19r,25s)-22,25,28,28-tetrahydroxy-22,28-dioxido-16-oxo-17,21,23,27-tetraoxa-22lambda~5~,28lambda~5~-diphosphaoctacos-7-en-19-yl (4z,7z,10z,13z,16z,19z)-4,7,10,13,16,19-docosahexaenoate	C44H74O13P2									78209.8	2.75274e+06	4.39317e+06	2.53908e+06	508396	227398	1.92451e+06	350002	3.80001e+06	9.4849e+06	2.29819e+06	1.44831e+06	351106	1.23823e+06	1.42926e+06	1.27872e+06	2.31205e+06	2.26163e+06	2.50155e+06	3.43401e+06	3.57758e+06	3.76883e+06	3.36978e+06
pos-3.507_852.49527	852.495	3.507	(7z,21r,27s)-24,27,30,30-tetrahydroxy-24,30-dioxido-18-oxo-19,23,25,29-tetraoxa-24lambda~5~,30lambda~5~-diphosphatriacont-7-en-21-yl (9z,12z)-9,12-octadecadienoate	C42H78O13P2									2.81223e+06	2.25636e+07	1.939e+07	7.73041e+06	9.21521e+06	1.80701e+06	7.72755e+06	7.38725e+06	1.33979e+07	1.91888e+07	1.12708e+07	4.47328e+06	5.39534e+06	6.48306e+06	1.44957e+07	1.61562e+07	1.81577e+07	1.17714e+07	1.24747e+07	9.99664e+06	9.87744e+06	9.66719e+06	1.10591e+07
neg-3.757_852.49495	852.495	3.757	(7z,21r,27s)-24,27,30,30-tetrahydroxy-24,30-dioxido-18-oxo-19,23,25,29-tetraoxa-24lambda~5~,30lambda~5~-diphosphatriacont-7-en-21-yl (9z,12z)-9,12-octadecadienoate	C42H78O13P2									23033	159583	3.00508e+06	656023	381602	18829.2	21535.3	668967	12453.5	77551.1	12439.1	13895.1	23817	62771.6	22609.2	100338	207976	209400	206730	204444	179279	151873	180552
pos-4.707_226.17131	226.171	4.707	(8e,15z)-1,8,15-heptadecatriene-11,13-diyne	C17H22									3.26606e+07	2.71836e+07	6.06216e+06	7.6573e+06	650283	7.49775e+06	4.19661e+07	1.81659e+07	1.95253e+07	1.38703e+07	4.90996e+06	1.46788e+07	1.98273e+07	1.92816e+07	1.37011e+07	2.81814e+07	1.90131e+07	1.6719e+07	1.81056e+07	9.21128e+06	1.45395e+07	1.75262e+07	1.71806e+07
pos-6.106_226.17139	226.171	6.106	(8e,15z)-1,8,15-heptadecatriene-11,13-diyne	C17H22									4.43151e+06	3.51684e+06	3.46823e+06	3.90714e+06	1.18149e+06	4.32942e+06	1.01142e+06	3.08191e+06	1.85055e+06	3.4595e+06	2.39515e+06	1.80811e+06	3.33143e+06	2.74606e+06	2.56563e+06	2.28617e+06	2.26452e+06	2.23572e+06	2.85143e+06	1.991e+06	2.28024e+06	2.4264e+06	1.89738e+06
neg-5.259_607.30952	607.31	5.259	pkhdia-pe	C28H50NO11P									1.43587e+07	1.27984e+07	3.15034e+06	1.12667e+07	1.73745e+07	4.02545e+06	5.6067e+06	1.74238e+07	1.09462e+07	3.76352e+06	1.25549e+07	8.51398e+06	3.72198e+06	1.03901e+07	7.6935e+06	2.20603e+07	7.92249e+06	8.32543e+06	8.10347e+06	7.72572e+06	8.70537e+06	7.67495e+06	7.98571e+06
neg-5.141_607.30944	607.309	5.141	pkhdia-pe	C28H50NO11P									3.35635e+06	2.19123e+06	391800	481892	3.79554e+06	897893	2.29873e+06	1.44374e+06	6.60264e+06	851002	1.96659e+06	827592	783753	675693	914268	2.01164e+06	1.51116e+06	1.01627e+06	1.20695e+06	1.55501e+06	1.10724e+06	901404	1.13148e+06
pos-4.277_605.33269	605.333	4.277	pkooa-pe	C29H52NO10P									137043	1.72453e+06	125816	115308	107587	116265	72702.8	65287.4	51397	121596	240212	617109	100208	82383	73663.6	32546.2	157741	131312	84149.7	161346	129098	123367	169970
pos-0.906_242.16809	242.168	0.906	(9e,15e)-heptadec-9,15-trien-11,13-diyn-4-one	C17H22O									3.38089e+07	1.73301e+07	5.16774e+06	2.77447e+07	8.5678e+07	4.26538e+07	1.39517e+07	5.85043e+07	2.34838e+07	3.17174e+07	2.14161e+07	5.89433e+07	5.05117e+07	3.0873e+07	7.30225e+06	1.36114e+07	2.58169e+07	2.17204e+07	2.02613e+07	2.04169e+07	2.273e+07	2.25301e+07	2.31346e+07
pos-0.784_242.1682	242.168	0.784	(9e,15e)-heptadec-9,15-trien-11,13-diyn-4-one	C17H22O									6.36566e+07	3.17608e+07	8.28823e+07	4.92256e+07	1.68894e+08	1.18117e+08	6.43286e+07	1.05185e+08	4.70461e+07	5.4796e+07	3.59962e+07	7.41245e+07	9.5606e+07	5.51351e+07	1.57797e+07	2.33682e+07	4.77696e+07	36615208	3.53072e+07	3.91377e+07	3.89048e+07	4.21185e+07	3.84537e+07
pos-0.69_242.16817	242.168	0.69	(9e,15e)-heptadec-9,15-trien-11,13-diyn-4-one	C17H22O									3.8392e+07	1.85697e+07	5.84133e+07	3.81414e+07	1.19862e+08	4.35518e+07	1.3252e+07	6.79142e+07	3.38583e+07	40039930	3.12861e+07	4.71931e+07	6.10036e+07	4.12056e+07	1.03202e+07	1.7529e+07	1.17391e+07	2.02678e+07	2.0382e+07	2.84025e+07	2.72397e+07	3.00694e+07	2.86325e+07
pos-6.222_242.16619	242.166	6.222	(9e,15e)-heptadec-9,15-trien-11,13-diyn-4-one	C17H22O									3.46559e+06	4.28738e+06	8.90562e+06	1.18289e+07	4.52109e+06	6.18842e+06	1.86214e+06	9.03131e+06	3.78117e+06	4.63386e+06	4.80056e+06	4.93095e+06	3.60506e+06	3.12883e+06	3.08367e+06	1.86826e+06	5.75368e+06	5.05452e+06	4.05334e+06	3.73859e+06	3.8582e+06	3.30406e+06	3.16758e+06
pos-4.54_309.26575	309.266	4.54	(9me,4e,8e,10e-d19:3)sphingosine	C19H35NO2									6.3074e+08	6.72858e+07	6.76825e+07	9.91698e+07	184181106	3.48296e+08	1.3155e+08	219558921	9.22787e+07	5.40253e+07	3.35681e+07	5.7679e+07	1.72602e+08	3.26476e+08	3.60413e+08	1.45648e+08	2.74309e+08	1.92205e+08	1.77929e+08	1.77655e+08	1.74573e+08	1.61636e+08	1.55134e+08
neg-7.607_396.22706	396.227	7.607	(9s_10s)-10-hydroxy-9-(phosphonooxy)octadecanoate	C18H37O7P									2.81308e+07	2.25564e+07	3.55594e+07	2.27862e+07	3.98662e+07	2.70063e+07	2.33687e+07	1.02051e+07	1.62143e+07	1.74925e+07	1.48274e+07	1.92959e+07	2.72859e+07	2.3679e+07	2.70647e+07	2.17801e+07	1.9325e+07	1.99138e+07	1.667e+07	2.49818e+07	2.5179e+07	1.53605e+07	1.80414e+07
neg-7.07_316.26084	316.261	7.07	(9s_10s)-9_10-dihydroxyoctadecanoate	C18H36O4									1.20728e+06	105393	563051	66865.2	577271	804733	278287	108349	128097	160816	138904	139333	5.29661e+06	8.46722e+06	4.53568e+06	3.10897e+06	2.25091e+06	2.25121e+06	2.26915e+06	2.33189e+06	2.41873e+06	2.30188e+06	2.47509e+06
neg-5.504_316.26084	316.261	5.504	(9s_10s)-9_10-dihydroxyoctadecanoate	C18H36O4									1.40624e+07	9.13409e+06	1.8943e+07	2.84929e+07	4.77632e+06	1.58273e+07	6.09339e+06	5.7438e+06	5.41222e+06	8.484e+06	1.04303e+07	1.08859e+07	4.44335e+06	4.58475e+06	4.1283e+06	2.89787e+06	6.64783e+06	6.41383e+06	6.77142e+06	6.28171e+06	6.07596e+06	6.58467e+06	7.08411e+06
neg-7.238_316.26081	316.261	7.238	(9s_10s)-9_10-dihydroxyoctadecanoate	C18H36O4									9.84946e+06	839604	6.69857e+06	534535	1.95561e+06	3.92319e+06	874080	1.2903e+06	1.90767e+06	1.42303e+06	2.32924e+06	1.18578e+06	3.49093e+07	5.4294e+07	4.1441e+07	2.53059e+07	1.73613e+07	1.81501e+07	1.79562e+07	1.7581e+07	1.92702e+07	1.90021e+07	1.63279e+07
neg-5.357_316.26084	316.261	5.357	(9s_10s)-9_10-dihydroxyoctadecanoate	C18H36O4									6.02046e+06	2.80651e+06	6.88049e+06	9.93933e+06	1.55503e+06	5.43068e+06	1.84065e+06	1.96037e+06	1.40843e+06	2.62054e+06	4.45539e+06	2.8446e+06	3.44694e+06	2.86338e+06	2.34577e+06	2.19121e+06	2.96925e+06	2.99442e+06	2.37793e+06	2.04828e+06	2.89072e+06	2.84912e+06	2.44919e+06
pos-5.671_294.21863	294.219	5.671	(9z)-(13s)-12_13-epoxyoctadeca-9_11-dienoicacid	C18H30O3									3.26311e+07	9.12439e+06	9.16063e+06	3.91484e+06	1.83436e+06	5.98137e+07	2.95582e+07	1.83163e+06	4.74728e+06	4.55653e+06	5.82554e+06	7.43354e+06	5.12623e+06	3.60194e+06	1.61962e+06	1.43901e+06	5.23416e+06	6.30613e+06	6.11431e+06	6.09587e+06	6.01758e+06	5.3159e+06	6.42686e+06
neg-6.15_294.21907	294.219	6.15	(9z)-(13s)-12_13-epoxyoctadeca-9_11-dienoicacid	C18H30O3									1.76387e+06	285542	976719	2.2231e+06	346789	1.03175e+06	523621	1.18125e+06	309452	281221	748739	495260	259421	1.34268e+06	324716	237985	549985	521199	416561	398552	648248	398930	480730
pos-5.891_294.21874	294.219	5.891	(9z)-(13s)-12_13-epoxyoctadeca-9_11-dienoicacid	C18H30O3									4.18105e+07	3.9201e+06	7.20926e+06	1.95721e+07	1.31247e+06	1.727e+07	2.58345e+06	4.04599e+06	3.56032e+06	3.95452e+06	7.64107e+06	7.16095e+06	6.19657e+06	8.88789e+06	4.22609e+06	5.96214e+06	5.12158e+06	4.44461e+06	6.73667e+06	6.37934e+06	5.1324e+06	5.67551e+06	6.0574e+06
pos-6.057_294.21868	294.219	6.057	(9z)-(13s)-12_13-epoxyoctadeca-9_11-dienoicacid	C18H30O3									4.18105e+07	3.4264e+06	7.20926e+06	3.04511e+07	1.2284e+06	1.727e+07	2.99333e+06	2.13966e+06	3.43464e+06	3.35381e+06	7.64107e+06	7.16095e+06	1.99395e+06	8.88789e+06	1.39975e+06	1.65036e+06	5.12158e+06	5.20792e+06	6.73667e+06	6.37934e+06	5.1324e+06	5.67551e+06	6.0574e+06
neg-5.59_294.21907	294.219	5.59	(9z)-(13s)-12_13-epoxyoctadeca-9_11-dienoicacid	C18H30O3									898777	580714	743290	4.22492e+06	208425	419962	594372	510036	971943	569251	1.28506e+06	900037	500314	258908	202936	569765	371195	338262	332021	457022	334247	374657	400476
neg-5.484_294.21914	294.219	5.484	(9z)-(13s)-12_13-epoxyoctadeca-9_11-dienoicacid	C18H30O3									3.15087e+06	1.73072e+06	3.43896e+06	5.05241e+06	563295	1.14195e+06	365150	938398	535624	848062	870742	1.42293e+06	1.48105e+06	1.88375e+06	1.17239e+06	2.05755e+06	1.47602e+06	1.21323e+06	1.45385e+06	896034	1.44084e+06	1.29234e+06	1.10812e+06
neg-5.904_294.21913	294.219	5.904	(9z)-(13s)-12_13-epoxyoctadeca-9_11-dienoicacid	C18H30O3									1.16833e+06	471276	1.78124e+06	2.73026e+06	167798	417354	187382	509404	331854	523815	385296	544313	454178	230301	184619	757516	459391	453516	352760	386671	393499	505741	422802
pos-4.503_437.31255	437.313	4.503	(9z,12z,15z)-3-hydroxyoctadecatrienoylcarnitine	C25H43NO5									976797	961998	657939	830655	3.42931e+06	733007	451473	1.62882e+06	129175	703128	663295	871276	1.70241e+06	490245	158256	541631	563467	604394	584591	531958	464618	563571	436933
pos-5.34_292.20296	292.203	5.34	(9z_15z)-(13s)-12_13-epoxyoctadeca-9_11_15-trienoicacid	C18H28O3									1.50361e+07	1.1278e+06	1.80525e+06	3.77863e+06	1.87091e+06	3.28227e+07	4.51074e+06	1.06524e+06	691039	864536	1.00583e+06	1.66306e+06	3.10164e+06	1.2808e+06	663435	1.34325e+06	1.27074e+06	1.0992e+06	863119	1.06956e+06	1.32102e+06	1.52109e+06	949068
pos-6.579_292.20307	292.203	6.579	(9z_15z)-(13s)-12_13-epoxyoctadeca-9_11_15-trienoicacid	C18H28O3									1.4588e+06	492834	377770	1.03421e+06	1.1421e+06	1.49673e+06	2.52264e+06	805406	630091	534211	938589	1.00253e+06	245714	1.38895e+06	743258	279049	564094	849183	793009	673390	500048	520536	394688
pos-5.503_292.20285	292.203	5.503	(9z_15z)-(13s)-12_13-epoxyoctadeca-9_11_15-trienoicacid	C18H28O3									1.8364e+07	2.93122e+06	4.21215e+06	3.56446e+06	2.62288e+06	1.55564e+07	4.82512e+06	1.76331e+06	852196	6.15382e+06	4.45517e+06	7.4143e+06	1.89139e+06	1.05253e+06	1.16579e+06	530910	2.50641e+06	3.4052e+06	3.30875e+06	2.78155e+06	2.84366e+06	2.67724e+06	2.66393e+06
neg-3.553_301.16367	301.164	3.553	(ac)2-l-lys-d-ala	C13H23N3O5				C02487					4.22711e+06	2.65644e+06	3.47542e+06	4.92204e+06	2.34935e+07	1.09703e+07	7.16801e+06	9.61521e+06	1.53954e+07	1.94052e+07	1.72583e+07	1.78065e+07	7.35096e+06	2.92828e+06	1.11377e+07	1.3502e+07	4.89516e+06	7.25889e+06	5.63392e+06	5.58369e+06	7.36085e+06	5.79065e+06	7.33014e+06
pos-3.542_301.16332	301.163	3.542	(ac)2-l-lys-d-ala	C13H23N3O5				C02487					4.97317e+06	3.60614e+06	2.42601e+06	7.63389e+06	2.66402e+07	1.30898e+07	6.00403e+06	7.88564e+06	1.35404e+07	1.44872e+07	3.07852e+07	3.52878e+07	1.3386e+07	4.52001e+06	2.69583e+07	1.35503e+07	9.37778e+06	1.0137e+07	7.38988e+06	9.49835e+06	8.46072e+06	7.73355e+06	1.16226e+07
pos-3.216_301.16313	301.163	3.216	(ac)2-l-lys-d-ala	C13H23N3O5				C02487					1.18284e+07	3.586e+07	2.28742e+07	2.73023e+07	2.85553e+07	1.48253e+07	3.61477e+07	4.58979e+07	4.38049e+07	1.78722e+07	3.8743e+07	2.73262e+07	2.04238e+07	1.4687e+07	3.22164e+07	5.13657e+07	3.23255e+07	2.64556e+07	3.23024e+07	2.67428e+07	3.21017e+07	3.85204e+07	3.51941e+07
pos-0.905_301.16265	301.163	0.905	(ac)2-l-lys-d-ala	C13H23N3O5				C02487					6.13538e+06	8.60726e+06	6.48725e+06	1.30414e+07	7.82332e+06	6.27706e+06	8.72462e+06	1.03524e+07	1.15363e+07	8.71264e+06	1.1582e+07	8.83034e+06	4.78394e+06	4.68436e+06	2.05091e+07	1.38252e+07	8.54343e+06	5.81178e+06	4.76643e+06	9.2052e+06	8.82169e+06	8.08346e+06	7.35942e+06
neg-3.19_301.16367	301.164	3.19	(ac)2-l-lys-d-ala	C13H23N3O5				C02487					1.25803e+06	2.00626e+07	1.9152e+07	1.76744e+07	7.94932e+06	2.44092e+06	11642604	9.53394e+06	3.01976e+07	3.74707e+07	1.94429e+07	8.47621e+06	8.49331e+06	5.85749e+06	2.17159e+07	2.27696e+07	1.72198e+07	1.75472e+07	1.86278e+07	1.75403e+07	1.68083e+07	1.52099e+07	1.58947e+07
neg-3.692_198.05004	198.05	3.692	(e)-2-(hexa-3,5-dien-1-yn-1-yl)-5-(prop-1-yn-1-yl)thiophene	C13H10S									2.1315e+06	357476	1.42455e+06	3.13356e+06	6.51209e+06	3.78786e+06	2.37051e+06	5.61566e+06	1.00276e+06	1.22966e+06	1.12529e+06	1.61862e+06	1.58869e+06	1.37307e+06	1.12122e+06	983092	1.0411e+06	1.19939e+06	1.00606e+06	1.12169e+06	1.13582e+06	1.34992e+06	1.21297e+06
neg-0.906_188.03168	188.032	0.906	(e)-2-(methoxycarbonylmethyl)butenedioate	C7H8O6				C11515					6.16697e+07	1.33458e+07	3.40948e+07	6.45734e+07	4.47722e+07	4.16641e+07	3.62159e+07	3.24184e+07	4.73593e+07	2.02807e+07	60672670	4.74204e+07	2.88842e+07	3.19874e+07	9.67471e+06	2.13038e+07	3.07976e+07	3.51771e+07	2.97845e+07	2.89594e+07	3.01439e+07	3.00866e+07	3.13048e+07
neg-1.366_188.03168	188.032	1.366	(e)-2-(methoxycarbonylmethyl)butenedioate	C7H8O6				C11515					1.47502e+07	8.47095e+06	1.61772e+07	3.24718e+07	1.61648e+07	1.62037e+07	8.59157e+06	1.08985e+07	1.25769e+07	8.41939e+06	2.21429e+07	1.8155e+07	1.10327e+07	9.02822e+06	3.58087e+06	8.08657e+06	1.19908e+07	1.00965e+07	1.17238e+07	1.18322e+07	1.20734e+07	1.36271e+07	1.40296e+07
pos-0.831_130.02628	130.026	0.831	(e)-glutaconate	C5H6O4	HMDB0000620	Organic acids and derivatives	Carboxylic acids and derivatives	C02214					1090277633	8.80266e+08	5.88613e+08	8.77581e+08	1057213032	9.85816e+08	6.08785e+08	1016774053	8.52418e+08	7.5207e+08	9.54521e+08	1069035910	1464527335	7.7663e+08	9.83137e+08	905751789	6.37952e+08	6.11298e+08	5.93775e+08	6.32326e+08	6.69449e+08	6.66921e+08	637598370
neg-3.352_319.15602	319.156	3.352	(e)-oxetorone	C21H21NO2									2.44509e+06	495465	151509	163391	125249	593193	189960	265738	1.12746e+06	841003	803630	521734	81358.2	31659.7	652388	811858	318198	261639	426722	285744	238043	423116	385958
neg-3.738_291.02001	291.02	3.738	(e)-thiamethoxam	C8H10ClN5O3S									53382.3	230071	109192	273273	531230	1.38198e+06	6.93116e+06	2.04419e+06	21051.1	29027.6	38030.1	40441.5	212836	322023	522008	218928	348535	326070	274079	292175	337171	308447	365454
neg-4.16_291.02001	291.02	4.16	(e)-thiamethoxam	C8H10ClN5O3S									222063	868720	335670	666953	1.18312e+06	2.7588e+06	8.30666e+06	2.28137e+06	163673	88288.8	108084	107808	703571	838596	949773	604485	597449	622306	664223	613408	674699	623504	609914
pos-4.369_206.10894	206.109	4.369	(e,e)-1,4-diphenyl-1,3-butadiene	C16H14									311940	573983	188177	192723	462740	1.49104e+06	7.22691e+06	2.04506e+06	181998	120039	128889	172461	2.24155e+06	1.8471e+06	3.65714e+06	849103	673076	580116	796089	637569	839282	701693	805352
neg-3.331_418.17009	418.17	3.331	(phenylphosphoryl)bis(mesitylmethanone)	C10H30N10O2S3									96099.8	2.11549e+06	874940	2.36638e+06	520268	957198	2.47394e+06	3.31052e+06	3.61959e+06	4.80987e+06	1.98816e+06	1.33301e+06	1.34942e+06	2.68066e+06	3.97748e+06	2.00914e+06	1.38224e+06	2.06454e+06	1.18328e+06	1.30726e+06	2.28979e+06	2.37983e+06	2.46651e+06
neg-0.894_418.16901	418.169	0.894	(phenylphosphoryl)bis(mesitylmethanone)										347859	1.3088e+06	1.1526e+06	1.339e+06	1.57081e+06	466247	486022	2.47777e+06	2.58229e+06	2.17349e+06	1.1557e+06	945264	845239	468346	1.7697e+06	2.26147e+06	1.14784e+06	1.22288e+06	994455	1.09767e+06	972530	1.08886e+06	1.26991e+06
pos-3.327_418.17031	418.17	3.327	(phenylphosphoryl)bis(mesitylmethanone)	C10H30N10O2S3									417499	3.31516e+06	1.48693e+06	2.36512e+06	538907	2.18339e+06	2.17848e+06	2.76901e+06	4.68585e+06	5.74929e+06	2.78931e+06	1.72624e+06	1.6075e+06	2.48132e+06	3.81524e+06	2.56357e+06	2.02322e+06	2.99493e+06	2.56698e+06	2.45095e+06	2.63753e+06	2.95245e+06	3.09521e+06
neg-8.296_300.266	300.266	8.296	(r)-10-hydroxystearate	C18H36O3				C03195					1.46959e+07	3.78613e+06	4.63982e+06	5.13908e+06	1.6375e+07	7.84334e+06	1.79823e+07	6.05234e+06	5.85961e+06	5.55842e+06	4.70484e+06	5.81616e+06	2.76294e+07	3.35633e+07	3.63013e+07	2.38105e+07	1.08064e+07	1.53151e+07	1.4829e+07	1.06895e+07	1.23553e+07	1.78142e+07	1.31831e+07
neg-8.151_300.26601	300.266	8.151	(r)-10-hydroxystearate	C18H36O3				C03195					1.40937e+06	174200	272870	343372	615236	499255	263942	356011	215641	303821	195760	383851	4.63267e+06	8.19523e+06	1.35492e+07	7.63873e+06	2.51365e+06	2.44395e+06	2.60431e+06	2.67066e+06	2.87876e+06	3.15443e+06	2.78549e+06
neg-5.109_300.26607	300.266	5.109	(r)-10-hydroxystearate	C18H36O3				C03195					1.01732e+07	151657	116941	123395	1.34379e+06	187421	520832	171792	105412	621341	91187.8	118202	172613	120552	443867	155486	616058	604084	562708	563970	579496	530814	542444
neg-7.984_300.26603	300.266	7.984	(r)-10-hydroxystearate	C18H36O3				C03195					4.7666e+07	471941	594067	955716	2.21399e+06	1.55089e+06	1.44576e+06	1.16881e+06	853230	940033	1.44788e+06	2.28867e+06	1.56893e+06	1.09491e+06	3.89594e+06	1.11664e+06	2.06294e+06	2.18624e+06	2.11366e+06	2.12199e+06	2.15073e+06	2.35154e+06	2.14268e+06
neg-0.909_148.03673	148.037	0.909	(r)-2-hydroxyglutarate	C5H8O5	HMDB0000606	Organic acids and derivatives	Hydroxy acids and derivatives	C01087					9.18308e+06	6.27314e+06	6.46669e+06	8.5389e+06	2.33035e+07	1.48278e+07	5.84083e+06	7.86704e+06	6.56611e+06	5.60865e+06	7.3129e+06	4.03491e+06	6.51049e+06	8.50229e+06	5.69157e+06	6.97444e+06	5.25107e+06	5.82426e+06	5.46296e+06	5.16485e+06	5.58596e+06	5.7684e+06	5.76082e+06
neg-0.837_148.03665	148.037	0.837	(r)-2-hydroxyglutarate	C5H8O5	HMDB0000606	Organic acids and derivatives	Hydroxy acids and derivatives	C01087					1455042293	1.87154e+08	6.08624e+07	1.22715e+08	1052380060	4.87514e+08	1.75167e+08	1.79309e+08	4.33549e+08	3.15412e+08	3.9855e+08	7.67836e+08	1139496576	744534030	447237619	2.26485e+08	2.54895e+08	2.45398e+08	2.46939e+08	2.51003e+08	1.69176e+08	1.81584e+08	1.94367e+08
pos-4.191_163.09927	163.099	4.191	(r)-2-methylimino-1-phenylpropan-1-ol	C10H13NO				C04351	Metabolism|Metabolism	Amino acid metabolism|Global and overview maps	Phenylalanine metabolism|Metabolic pathways	map00360|map01100	1.47672e+07	3.47718e+06	4.47419e+06	4.84742e+06	1.74375e+07	1.34596e+07	8.41475e+06	9.20619e+06	4.47872e+06	3.51645e+06	5.66853e+06	6.66678e+06	7.31533e+06	5.90111e+06	3.93416e+06	4.57388e+06	4.67947e+06	5.12211e+06	5.32231e+06	6.14769e+06	5.5307e+06	5.95649e+06	4.18606e+06
pos-0.833_103.06309	103.063	0.833	(r)-3-amino-2-methylpropanoate	C4H9NO2	HMDB0002299	Organic acids and derivatives	Carboxylic acids and derivatives	C01205	Metabolism|Metabolism|Metabolism	Nucleotide metabolism|Amino acid metabolism|Global and overview maps	Pyrimidine metabolism|Valine, leucine and isoleucine degradation|Metabolic pathways	map00240|map00280|map01100	2.08083e+08	7.77258e+07	5.07634e+07	2.05747e+08	7.70616e+07	1.18261e+08	7.10741e+07	6.95947e+07	5.06665e+07	5.86881e+07	7.41423e+07	2.68431e+08	1.00337e+08	8.44033e+07	7.12497e+07	7.65134e+07	3.7823e+07	5.87174e+07	3.61452e+07	5.57448e+07	6.32344e+07	6.7959e+07	57728441
pos-3.266_601.34327	601.343	3.266	(2r,3r,3ar,4as,4bs,6as,8ar,11ar,15bs,15cr,17as)-3,4b-dihydroxy-2-isopropenyl-9,9,11,11,15b,15c-hexamethyl-3,3a,5,6,6a,8,8a,9,11,11a,15,15b,15c,16,17,17a-hexadecahydro-2h,4bh-[2]benzofuro[5,6-e]oxireno[4',4a']chromeno[5',6':6,7]indeno[1,2-b]indol-12(7h)-one	C37H47NO6									3.57747e+06	1.32332e+07	7.57611e+06	1.21634e+07	9.10771e+06	2.78957e+06	9.39312e+06	8.29356e+06	8.42237e+06	4.86477e+06	1.00939e+07	8.05041e+06	8.65997e+06	8.53599e+06	1.00732e+07	9.4898e+06	1.08363e+07	9.04921e+06	7.02008e+06	8.55867e+06	1.13926e+07	1.04804e+07	9.40263e+06
neg-0.906_146.05757	146.058	0.906	(r)-4-dehydropantoate	C6H10O4				C01053	Metabolism	Metabolism of cofactors and vitamins	Pantothenate and CoA biosynthesis	map00770	1.91684e+06	2.738e+06	4.35456e+06	3.34958e+06	1.11269e+07	4.61934e+06	4.05006e+06	1.09593e+07	2.57134e+06	2.10603e+06	2.28975e+06	2.95439e+06	4.19046e+06	2.65537e+06	1.14908e+06	3.24181e+06	2.62858e+06	2.63824e+06	2.42126e+06	2.49712e+06	2.3271e+06	2.03189e+06	2.53909e+06
neg-3.398_146.05756	146.058	3.398	(r)-4-dehydropantoate	C6H10O4				C01053	Metabolism	Metabolism of cofactors and vitamins	Pantothenate and CoA biosynthesis	map00770	3.80614e+06	674247	403495	297113	1.21759e+06	1.17365e+06	724126	814078	73418.5	281849	518460	591801	982434	1.35353e+06	391988	283884	356790	367196	373814	386706	491069	406070	534442
pos-5.155_285.13658	285.137	5.155	(r)-coclaurine	C17H19NO3				C06349					91205.6	34590.6	37372.8	39424	83294.4	115748	98249.8	90845.4	45083.6	42147.1	204016	66942.8	384844	110524	4.16342e+06	283615	102934	102423	64357.3	62323.1	86339.9	75389.8	87382.4
neg-0.866_74.03646	74.0365	0.866	(r)-lactaldehyde	C3H6O2	HMDB0006458	Organic oxygen compounds	Organooxygen compounds	C00937	Metabolism|Metabolism	Carbohydrate metabolism|Global and overview maps	Pyruvate metabolism|Metabolic pathways	map00620|map01100	2.03679e+07	1.87388e+07	1.92902e+07	2.51817e+07	2.37806e+07	2.22616e+07	1.03364e+07	1.42923e+07	1.78181e+07	1.86412e+07	1.6392e+07	2.2772e+07	1.53729e+07	1.84807e+07	1.63145e+07	1.48474e+07	1.398e+07	1.45262e+07	1.49532e+07	1.35108e+07	1.25995e+07	1.34639e+07	1.3401e+07
neg-1.659_74.03654	74.0365	1.659	(r)-lactaldehyde	C3H6O2	HMDB0006458	Organic oxygen compounds	Organooxygen compounds	C00937	Metabolism|Metabolism	Carbohydrate metabolism|Global and overview maps	Pyruvate metabolism|Metabolic pathways	map00620|map01100	3.63141e+06	412619	1.015e+06	838386	954745	989855	763907	1.54729e+06	731689	630055	383961	446530	346897	2.27806e+06	816977	897765	639763	620373	591693	561577	697422	836368	876147
pos-3.581_271.1212	271.121	3.581	(r)-norcoclaurine	C16H17NO3	HMDB0033103	Organoheterocyclic compounds	Isoquinolines and derivatives	C06347					415079	4.4342e+06	60122.1	47947.3	4.76153e+06	755063	1.04433e+06	1.89883e+06	417201	208204	211134	595583	219573	432806	1.13081e+06	1.23191e+06	986604	787006	840207	924640	861749	850670	964009
neg-3.791_130.06271	130.063	3.791	(r)-pantolactone	C6H10O3				C01012					7.36475e+07	45297102	1.33991e+08	1.77876e+08	2.5964e+08	1.36066e+08	1.06096e+08	2.13075e+08	1.05035e+08	1.44371e+08	7.98184e+07	6.35109e+07	8.5889e+07	8.53477e+07	7.44571e+07	7.95773e+07	8.48104e+07	8.5966e+07	78865671	8.26532e+07	7.75076e+07	7.57549e+07	7.33841e+07
neg-3.693_130.06271	130.063	3.693	(r)-pantolactone	C6H10O3				C01012					5.63131e+07	2.22648e+07	7.54941e+07	117931267	1.41907e+08	8.80223e+07	6.2513e+07	1.27345e+08	4.72826e+07	6.69707e+07	4.84627e+07	4.90944e+07	6.60507e+07	4.89315e+07	4.78226e+07	4.678e+07	4.68106e+07	4.73107e+07	42850272	4.53916e+07	4.40592e+07	5.59962e+07	5.27055e+07
neg-3.349_130.06271	130.063	3.349	(r)-pantolactone	C6H10O3				C01012					4.83734e+06	2.27255e+06	3.22596e+06	6.15621e+06	1.2445e+06	1.21748e+07	687684	3.03501e+06	1.58181e+06	1.10134e+06	3.65199e+06	3.46716e+06	2.33565e+06	2.39207e+06	1.6094e+06	1.85576e+06	1.43499e+06	1.35603e+06	1.59043e+06	1.36472e+06	1.71232e+06	2.45657e+06	2.34118e+06
neg-5.573_130.06271	130.063	5.573	(r)-pantolactone	C6H10O3				C01012					1.85458e+06	3.68574e+06	7.55097e+06	1.06666e+07	1.44024e+06	6295747	657653	2.33678e+06	5.00971e+06	3.66207e+06	7.24731e+06	5.80721e+06	1.59569e+06	2.9093e+06	1.0953e+06	1.05299e+06	2.55105e+06	3.27422e+06	3.2447e+06	2.53808e+06	2.2014e+06	3.04606e+06	2.40386e+06
neg-0.883_150.01587	150.016	0.883	(r_r)-tartaricacid	C4H6O6									1406279472	1.43866e+08	1.97119e+07	1.92198e+07	1002630902	4.17614e+08	9.42627e+07	7.43645e+07	3.86802e+08	2.71248e+08	3.32885e+08	7.26331e+08	1066473696	6.6676e+08	3.49228e+08	1.35096e+08	1.9093e+08	1.82777e+08	1.83852e+08	1.88823e+08	1.10386e+08	1.16485e+08	1.27043e+08
pos-0.843_113.04749	113.047	0.843	(s)-1-pyrroline-5-carboxylate	C5H7NO2	HMDB0001301	Organic acids and derivatives	Carboxylic acids and derivatives	C03912	Metabolism|Metabolism|Metabolism|Metabolism|Metabolism|Metabolism	Amino acid metabolism|Amino acid metabolism|Biosynthesis of other secondary metabolites|Global and overview maps|Global and overview maps|Global and overview maps	Alanine, aspartate and glutamate metabolism|Arginine and proline metabolism|Carbapenem biosynthesis|Metabolic pathways|Biosynthesis of secondary metabolites|Biosynthesis of amino acids	map00250|map00330|map00332|map01100|map01110|map01230	2.18474e+07	2.71055e+07	2.42326e+07	1.0809e+07	3.50044e+07	4.38107e+07	1.54018e+07	3.50181e+07	2.03581e+07	1.77148e+07	1.83153e+07	1.39916e+07	2.37234e+07	2.42081e+07	2.08444e+07	1.4814e+07	1.73424e+07	1.67744e+07	2.13205e+07	1.56863e+07	2.12049e+07	1.52851e+07	9.63164e+06
pos-0.899_113.04749	113.047	0.899	(s)-1-pyrroline-5-carboxylate	C5H7NO2	HMDB0001301	Organic acids and derivatives	Carboxylic acids and derivatives	C03912	Metabolism|Metabolism|Metabolism|Metabolism|Metabolism|Metabolism	Amino acid metabolism|Amino acid metabolism|Biosynthesis of other secondary metabolites|Global and overview maps|Global and overview maps|Global and overview maps	Alanine, aspartate and glutamate metabolism|Arginine and proline metabolism|Carbapenem biosynthesis|Metabolic pathways|Biosynthesis of secondary metabolites|Biosynthesis of amino acids	map00250|map00330|map00332|map01100|map01110|map01230	5.60215e+07	2.55423e+07	2.17214e+07	9.42238e+07	4.08519e+07	1.92802e+07	2.73388e+07	3.40237e+07	2.84335e+07	7.24677e+07	2.99979e+07	4.10965e+07	3.49315e+07	2.17221e+07	2.39492e+07	4.0893e+07	2.3897e+07	2.07757e+07	2.04466e+07	2.21497e+07	2.58153e+07	2.44997e+07	2.38127e+07
pos-1.463_113.04754	113.048	1.463	(s)-1-pyrroline-5-carboxylate	C5H7NO2	HMDB0001301	Organic acids and derivatives	Carboxylic acids and derivatives	C03912	Metabolism|Metabolism|Metabolism|Metabolism|Metabolism|Metabolism	Amino acid metabolism|Amino acid metabolism|Biosynthesis of other secondary metabolites|Global and overview maps|Global and overview maps|Global and overview maps	Alanine, aspartate and glutamate metabolism|Arginine and proline metabolism|Carbapenem biosynthesis|Metabolic pathways|Biosynthesis of secondary metabolites|Biosynthesis of amino acids	map00250|map00330|map00332|map01100|map01110|map01230	9.46878e+06	6.31644e+06	6.52e+06	2.53245e+07	6.09469e+06	2.5659e+06	3.57841e+06	1.48284e+07	2.00164e+06	2.39807e+07	2.52819e+06	2.55222e+06	3.08302e+06	4.20484e+06	8.00755e+06	2.21159e+06	1.88252e+06	2.45562e+06	2.62767e+06	2.4062e+06	2.62685e+06	3.09644e+06	2.38814e+06
neg-0.856_132.04197	132.042	0.856	(s)-2-acetolactate	C5H8O4	HMDB0006855	Organic acids and derivatives	Keto acids and derivatives	C06010	Metabolism|Metabolism|Metabolism|Metabolism|Metabolism|Metabolism|Metabolism|Metabolism	Amino acid metabolism|Carbohydrate metabolism|Carbohydrate metabolism|Metabolism of cofactors and vitamins|Global and overview maps|Global and overview maps|Global and overview maps|Global and overview maps	Valine, leucine and isoleucine biosynthesis|Butanoate metabolism|C5-Branched dibasic acid metabolism|Pantothenate and CoA biosynthesis|Metabolic pathways|Biosynthesis of secondary metabolites|2-Oxocarboxylic acid metabolism|Biosynthesis of amino acids	map00290|map00650|map00660|map00770|map01100|map01110|map01210|map01230	5.95675e+07	6.05148e+07	6.64417e+07	7.3549e+07	1.35667e+08	6.81136e+07	3.10638e+07	7.44394e+07	7.16954e+07	5.97215e+07	6.26192e+07	9.16412e+07	7.90177e+07	7.03238e+07	6.58393e+07	5.64791e+07	4.90983e+07	4.95152e+07	3.86353e+07	4.46579e+07	4.53937e+07	4.45261e+07	4.33962e+07
neg-5.273_601.33749	601.337	5.273	(2r,3r,3ar,4as,4bs,6as,8ar,11ar,15bs,15cr,17as)-3,4b-dihydroxy-2-isopropenyl-9,9,11,11,15b,15c-hexamethyl-3,3a,5,6,6a,8,8a,9,11,11a,15,15b,15c,16,17,17a-hexadecahydro-2h,4bh-[2]benzofuro[5,6-e]oxireno[4',4a']chromeno[5',6':6,7]indeno[1,2-b]indol-12(7h)-one	C37H47NO6									1.02344e+06	1.80449e+06	342545	331398	854168	553778	133803	320721	2.48403e+06	434726	184382	397480	779992	822775	916316	1.31722e+06	814830	900086	827705	832766	701086	749934	752515
pos-3.327_291.14575	291.146	3.327	(s)-edulinine	C16H21NO4	HMDB0030178	Organoheterocyclic compounds	Quinolines and derivatives						892989	559037	1.15661e+06	665239	325376	415899	642066	1.85807e+06	1.52757e+06	1.10715e+06	163032	1.05803e+06	252008	858535	303653	1.14252e+06	443794	397192	610761	560119	564952	564817	785889
pos-6.104_200.15588	200.156	6.104	(s)-gamma-calacorene	C15H20	HMDB0036451	Lipids and lipid-like molecules	Prenol lipids						6.78644e+06	3.97133e+06	6.83858e+06	7.14701e+06	9.82472e+06	7.09921e+06	4.98257e+06	8.87012e+06	4.71275e+06	4.29078e+06	4.67359e+06	4.97443e+06	6.08286e+06	6.0184e+06	5.85779e+06	3.48365e+06	4.45122e+06	4.47595e+06	4.72746e+06	3.74828e+06	4.2928e+06	4.22311e+06	4.07642e+06
pos-6.223_200.15588	200.156	6.223	(s)-gamma-calacorene	C15H20	HMDB0036451	Lipids and lipid-like molecules	Prenol lipids						2.17434e+06	6.24816e+06	9.49209e+06	1.15775e+07	6.02686e+06	7.25977e+06	921615	9.67539e+06	4.88112e+06	3.50468e+06	5.22213e+06	4.20952e+06	4.0658e+06	4.19073e+06	3.15789e+06	2.65886e+06	4.49074e+06	5.57695e+06	4.83096e+06	3.78693e+06	4.7612e+06	2.52858e+06	3.55786e+06
pos-4.934_200.15585	200.156	4.934	(s)-gamma-calacorene	C15H20	HMDB0036451	Lipids and lipid-like molecules	Prenol lipids						1.827e+07	3.02971e+06	710042	990907	1.35352e+06	3.96267e+06	4.84135e+06	8.15513e+06	1.05707e+06	1.13329e+06	567518	844447	910297	9.59341e+06	928770	1.48321e+06	1.11406e+06	1.52242e+06	1.29963e+06	1.29766e+06	1.35441e+06	957806	934071
pos-6.336_200.15589	200.156	6.336	(s)-gamma-calacorene	C15H20	HMDB0036451	Lipids and lipid-like molecules	Prenol lipids						2.97293e+06	2.82286e+06	2.99892e+06	4.31882e+06	2.31419e+06	3.28876e+06	978484	2.3817e+06	2.00789e+06	2.15178e+06	1.46365e+06	2.23061e+06	2.18145e+06	2.40464e+06	3.86457e+06	1.86286e+06	3.03495e+06	2.10394e+06	1.7458e+06	2.10175e+06	1.84062e+06	1.47873e+06	1.59957e+06
pos-4.494_200.15585	200.156	4.494	(s)-gamma-calacorene	C15H20	HMDB0036451	Lipids and lipid-like molecules	Prenol lipids						2.90628e+06	2.17876e+06	2.97021e+06	5.04424e+06	1.14473e+06	4.36339e+06	998473	1.18886e+06	1.98035e+06	1.51467e+06	3.22091e+06	3.5246e+06	3.45089e+06	4.78105e+06	1.90986e+06	1.55718e+06	3.41603e+06	2.39705e+06	2.17161e+06	2.59155e+06	2.40653e+06	3.11001e+06	2.50292e+06
pos-4.232_200.15587	200.156	4.232	(s)-gamma-calacorene	C15H20	HMDB0036451	Lipids and lipid-like molecules	Prenol lipids						1.19379e+06	149647	306593	970710	368958	254620	374593	525980	2.4005e+06	128324	936961	822720	536704	1.34723e+06	196312	125357	164706	140707	142630	167654	207460	142710	137183
pos-5.512_200.15591	200.156	5.512	(s)-gamma-calacorene	C15H20	HMDB0036451	Lipids and lipid-like molecules	Prenol lipids						1.6834e+07	6.15245e+06	1.25121e+07	1.77086e+07	2.19305e+06	1.84489e+07	2.23808e+06	6.60185e+06	5.95453e+06	6.92722e+06	1.11478e+07	1.07141e+07	7.69499e+06	9.14669e+06	6.85729e+06	3.41963e+06	7.27093e+06	8.43494e+06	7.17501e+06	7.73547e+06	6.9352e+06	4.14569e+06	6.31007e+06
pos-5.418_200.15593	200.156	5.418	(s)-gamma-calacorene	C15H20	HMDB0036451	Lipids and lipid-like molecules	Prenol lipids						3.76661e+06	1.01678e+06	3.48208e+06	5.01697e+06	927873	2.50223e+06	753313	445490	650229	906459	3.31994e+06	2.07431e+06	1.50268e+06	1.64603e+06	825162	671093	1.13783e+06	1.28227e+06	986560	1.33243e+06	1.09378e+06	1.05185e+06	1.01249e+06
neg-3.361_295.09152	295.092	3.361	(s)-malyl alpha-d-glucosaminide	C10H17NO9									5.95328e+06	3.53268e+07	8.26436e+07	1.54289e+08	6.54683e+08	2.77175e+06	552129	2.72438e+08	109759	223898	625315	711003	2.19025e+06	323289	109376	1.31105e+08	4.65343e+07	4.7809e+07	4.37292e+07	4.80008e+07	4.72491e+07	4.93375e+07	4.48833e+07
pos-3.348_295.09168	295.092	3.348	(s)-malyl alpha-d-glucosaminide	C10H17NO9									2.33367e+07	1.5571e+07	3.64907e+07	6.99889e+07	2.72338e+08	2.87551e+07	8.27002e+06	1.20044e+08	7.98576e+06	2.02924e+06	7.15919e+06	6.9704e+06	1.27172e+07	5.07234e+06	2.3613e+06	5.60942e+07	2.12946e+07	2.1473e+07	1.97701e+07	2.29439e+07	2.26953e+07	2.34488e+07	2.32107e+07
pos-4.411_228.11756	228.118	4.411	(s)-menthone 8-thioacetate	C12H20O2S	HMDB0037386	Lipids and lipid-like molecules	Prenol lipids						2.34125e+07	6.96284e+07	1.29461e+07	1.20521e+07	3.28862e+08	3.01353e+07	4.51177e+07	8.26246e+07	5.72744e+06	6.04936e+06	9.62303e+06	2.08588e+07	1.28469e+07	6.42386e+06	8.57154e+06	3.45801e+07	3.76763e+07	3.72678e+07	3.91755e+07	4.07186e+07	3.72335e+07	4.3762e+07	4.05904e+07
pos-4.36_228.1175	228.118	4.36	(s)-menthone 8-thioacetate	C12H20O2S	HMDB0037386	Lipids and lipid-like molecules	Prenol lipids						2.73813e+07	3.1876e+07	1.45877e+07	1.37837e+07	2.07817e+08	3.03762e+07	4.6832e+07	5.8704e+07	7.02086e+06	6.07129e+06	5.99943e+06	1.07832e+07	1.0932e+07	5.36603e+06	6.91319e+06	1.80559e+07	2.90479e+07	2.82733e+07	2.93344e+07	2.66763e+07	2.95722e+07	2.51988e+07	2.91201e+07
neg-1.367_102.03146	102.031	1.367	(s)-methylmalonatesemialdehyde	C4H6O3									1.44196e+08	2.33312e+08	3.0182e+08	2.4772e+08	1029939157	3.17524e+08	2.58573e+08	9.87826e+08	1.64233e+08	1.76802e+08	1.5374e+08	2.23152e+08	3.03857e+08	1.70073e+08	1.04803e+08	2.87595e+08	2.10481e+08	2.53872e+08	2.01907e+08	1.9638e+08	2.70071e+08	2.19263e+08	198852781
neg-1.011_102.03146	102.031	1.011	(s)-methylmalonatesemialdehyde	C4H6O3									7.59204e+07	1.0577e+08	2.02857e+08	1.79009e+08	6.20668e+08	1.60493e+08	1.24847e+08	6.28695e+08	1.04629e+08	9.09327e+07	9.0002e+07	1.31675e+08	2.52364e+08	8.3321e+07	5.7613e+07	1.70868e+08	1.66589e+08	114365231	1.4837e+08	1.019e+08	123623437	1.52658e+08	1.31578e+08
neg-0.924_102.03138	102.031	0.924	(s)-methylmalonatesemialdehyde	C4H6O3									2.38492e+07	1.21223e+07	2.30463e+07	2.34671e+07	5.48289e+07	5.43681e+07	1.31937e+07	2.39985e+07	2.03121e+07	2.33075e+07	2.18156e+07	1.36207e+07	2.26197e+07	1.89185e+07	1.31305e+07	1.58409e+07	1.70809e+07	1.72408e+07	1.70618e+07	1.54671e+07	1.78069e+07	1.77523e+07	1.80944e+07
neg-0.872_102.0313	102.031	0.872	(s)-methylmalonatesemialdehyde	C4H6O3									1.57715e+07	1.78235e+08	2.06964e+08	1.61869e+08	1.3492e+08	1.65733e+08	1.87833e+07	7.61262e+07	9.19086e+07	9.88502e+07	6.60036e+07	1.66791e+08	51716173	9.77387e+07	8.60533e+07	4.37539e+07	7.10494e+07	8.25244e+07	8.12703e+07	7.76239e+07	7.0346e+07	6.64636e+07	6.74507e+07
pos-3.524_162.11543	162.115	3.524	(s)-nicotine	C10H14N2	HMDB0001934	Organoheterocyclic compounds	Pyridines and derivatives	C00745	Metabolism|Metabolism|Metabolism|Metabolism|Organismal Systems|Human Diseases|Human Diseases	Biosynthesis of other secondary metabolites|Xenobiotics biodegradation and metabolism|Chemical structure transformation maps|Global and overview maps|Environmental adaptation|Substance dependence|Cancer: overview	Tropane, piperidine and pyridine alkaloid biosynthesis|Metabolism of xenobiotics by cytochrome P450|Biosynthesis of alkaloids derived from ornithine, lysine and nicotinic acid|Biosynthesis of secondary metabolites|Thermogenesis|Nicotine addiction|Chemical carcinogenesis - receptor activation	map00960|map00980|map01064|map01110|map04714|map05033|map05207	9.0967e+06	2.14436e+06	1.93792e+06	2.68672e+06	8.22497e+06	8.24993e+06	4.57991e+06	4.6476e+06	2.55713e+06	1.80174e+06	2.81176e+06	3.3761e+06	4.53464e+06	4.14433e+06	2.52579e+06	2.22089e+06	2.20221e+06	2.6465e+06	2.62093e+06	2.41178e+06	2.02863e+06	2.47311e+06	2.39013e+06
neg-3.439_266.10612	266.106	3.439	(s)-pterosin k	C15H19ClO2	HMDB0036602	Benzenoids	Indanes						5.33809e+06	39676.3	43932.8	39571.9	119317	6.23791e+06	9.5071e+06	53754.9	43858.9	284314	993204	1.27532e+06	431694	281924	202838	37221.7	456519	389045	464489	474525	401207	464578	485020
pos-0.898_162.10803	162.108	0.898	(s1)-methoxy-3-heptanethiol	C8H18OS	HMDB0032380	Organic oxygen compounds	Organooxygen compounds						9.43249e+07	4.78471e+07	7.83532e+06	3.96375e+07	1.85192e+08	1.68125e+08	2.88058e+07	8.19123e+07	6.6952e+07	6.18049e+07	5.26947e+07	1.00618e+08	1.16582e+08	2.84651e+07	3.9254e+06	3.19133e+07	3.23113e+07	3.22548e+07	3.4073e+07	3.20821e+07	3.89594e+07	3.61199e+07	3.47515e+07
neg-5.372_593.33227	593.332	5.372	phoha-pe	C28H52NO10P									911317	2.42186e+06	365311	581849	2.46813e+06	407997	312237	624237	358582	313752	814471	1.27278e+06	804159	785957	248084	6.78363e+06	872898	751660	945039	725414	684896	589517	814190
neg-5.665_593.33018	593.33	5.665	phoha-pe	C28H52NO10P									6.66029e+06	2.47734e+07	7.86655e+06	5.91662e+06	6.20019e+06	5.22422e+06	3.19424e+06	4.71066e+06	2.44949e+06	7.01701e+06	5.94126e+06	6.59809e+06	4.74119e+06	7.75207e+06	9.63898e+06	6.14229e+06	5.71889e+06	6.01365e+06	6.0337e+06	6.30922e+06	5.71845e+06	5.37582e+06	5.72331e+06
neg-3.441_426.17854	426.179	3.441	(z)-narceine imide	C23H26N2O6	HMDB0030378	Organoheterocyclic compounds	Isoindoles and derivatives						34270.9	355470	99262.6	152821	45973.5	81058.2	190610	84990.1	643391	1.33775e+06	730356	170353	108142	262168	280811	121601	287124	267714	258684	259752	222934	285313	339202
pos-4.556_219.06777	219.068	4.556	(z)-oxamyl	C7H13N3O3S									318927	210900	199847	199024	2.01396e+07	1.63088e+07	1.26509e+07	9.44102e+06	148414	211323	135448	326678	672173	360019	439263	319138	1.76677e+06	1.6088e+06	1.50341e+06	1.55e+06	1.49899e+06	1.30772e+06	1.4681e+06
pos-3.893_219.0679	219.068	3.893	(z)-oxamyl	C7H13N3O3S									588115	403990	111026	241096	259916	1.83246e+06	6.92674e+06	2.35524e+06	82373.6	143890	88539.7	82196.2	160252	397631	261133	108839	197777	384631	311594	298633	347718	418774	317478
pos-4.476_218.10896	218.109	4.476	(z)-thiofanox	C9H18N2O2S									234140	302758	171220	141082	176576	265067	4.27099e+06	1.15647e+06	85261.5	84996.4	153369	122459	6.11994e+06	5.4871e+06	7.19055e+06	3.75256e+06	1.06492e+06	1.33093e+06	1.06756e+06	1.13211e+06	1.02441e+06	951895	959470
pos-3.854_218.10904	218.109	3.854	(z)-thiofanox	C9H18N2O2S									338675	118939	110177	164376	431102	343851	317123	233948	127516	101179	149786	210600	386946	581761	2.04026e+06	880434	181164	179918	248867	188911	162646	136261	238222
pos-1.364_103.04535	103.045	1.364	(锟斤拷)-2-methylthiazolidine	C4H9NS									2.11581e+08	1.90944e+08	188267958	2.08109e+08	4.34394e+08	2.81782e+08	2.63937e+08	3.83466e+08	2.08409e+08	2.02173e+08	2.16043e+08	2.09131e+08	2.33267e+08	1.7135e+08	2.27887e+08	2.23909e+08	1.70699e+08	1.70668e+08	1.69354e+08	1.9867e+08	1.96953e+08	2.12198e+08	1.99194e+08
pos-0.913_103.0454	103.045	0.913	(锟斤拷)-2-methylthiazolidine	C4H9NS									1.14934e+08	1.50755e+08	134131896	1.40535e+08	1.90681e+08	106700338	7.91902e+07	2.378e+08	1.07056e+08	1.68538e+08	1.83242e+08	1.60082e+08	1.28792e+08	1.3103e+08	1.90141e+08	1.8172e+08	1.24169e+08	1.31495e+08	8.43648e+07	128445977	1.6482e+08	1.43831e+08	1.43805e+08
neg-4.211_450.11918	450.119	4.211	(锟斤拷)-flufenprox	C24H22ClF3O3									55345.1	64259.5	87271.9	100316	92622.2	315312	2.35542e+06	533463	76920.3	67353.8	40432.8	50217.8	135801	350867	284610	214680	170832	184463	160543	161144	124660	194078	126432
neg-1.536_127.06305	127.063	1.536	?-(methylenecyclopropyl)glycine	C6H9NO2									1.21398e+06	435993	784232	400682	1.61027e+07	7.57808e+06	5.32579e+06	1.34201e+07	363161	534699	511493	1.04066e+06	808594	579246	1.19148e+06	541450	1.31474e+06	1.30682e+06	1.42949e+06	1.20256e+06	1.49297e+06	1.44106e+06	1.69122e+06
pos-1.362_127.06311	127.063	1.362	?-(methylenecyclopropyl)glycine	C6H9NO2									7.64212e+06	3.8055e+06	2.63012e+06	145976480	1.86527e+07	4.56318e+06	1.20387e+07	3.18454e+06	2.12317e+07	9.96743e+07	3.01503e+07	2.8835e+07	6.32806e+07	2.73816e+06	4.27823e+06	3.2217e+07	2.00775e+07	2.04195e+07	1.7501e+07	2.23881e+07	2.95902e+07	2.35521e+07	2.8087e+07
neg-3.609_278.16286	278.163	3.609	?leucylphenylalanine	C15H22N2O3									609302	3.19572e+06	4.46918e+06	4.75607e+06	1.07265e+07	1.47453e+06	7.64461e+06	8.39072e+06	7.16353e+06	6.29561e+06	4.45659e+06	3.90101e+06	1.7562e+06	1.3304e+06	7.69805e+06	4.63189e+06	3.96302e+06	4.04443e+06	5.3985e+06	5.03676e+06	5.51875e+06	5.71847e+06	5.4239e+06
pos-3.605_278.16275	278.163	3.605	?leucylphenylalanine	C15H22N2O3									3.6325e+06	3.00787e+07	3.65557e+07	2.38524e+07	6.74553e+07	1.66033e+07	6.68312e+07	5.12403e+07	5.00679e+07	4.8581e+07	3.14328e+07	2.815e+07	1.39503e+07	1.17258e+07	4.35098e+07	3.59124e+07	2.79008e+07	2.75657e+07	3.07881e+07	4.22368e+07	3.08134e+07	2.57199e+07	3.10415e+07
neg-3.57_278.16282	278.163	3.57	?leucylphenylalanine	C15H22N2O3									76756.2	1.91346e+06	2.22574e+06	1.20675e+06	1.93947e+06	494032	3.83699e+06	2.15036e+06	3.0468e+06	2.46751e+06	1.43406e+06	1.2588e+06	825477	533997	517796	2.16104e+06	1.71956e+06	1.84051e+06	1.36222e+06	1.25634e+06	1.52578e+06	1.45725e+06	1.45015e+06
neg-4.284_343.10838	343.108	4.284	?niazinin	C15H21NO6S									1.5067e+06	105017	205665	352484	5.53625e+06	1.58531e+06	404163	1.47361e+06	205887	304047	282001	883297	777027	350557	412320	222289	595367	652308	481540	474793	541672	525213	461120
neg-4.369_682.34551	682.346	4.369	[(1alpha,6beta,14alpha,16beta)-20-ethyl-7,8-dihydroxy-1,6,14,16-tetramethoxyaconitan-4-yl]methyl 2-(3-methyl-2,5-dioxo-1-pyrrolidinyl)benzoate	C37H50N2O10									53716.6	1.64916e+07	1.01408e+07	3.68871e+06	319660	601468	2.57323e+06	1.63771e+06	6.2566e+06	8.54903e+06	8.2881e+06	6.02777e+06	6.75359e+06	2036325	6.09167e+06	9.39747e+06	4.63212e+06	4.27024e+06	4.30296e+06	4.77828e+06	3.15235e+06	3.19649e+06	4.71839e+06
pos-3.362_681.4057	681.406	3.362	[(2r,3r,4e,6e,9r,11s,12s,13s,14e)-2-ethyl-9,11,13-trimethyl-8,16-dioxo-12-{[3,4,6-trideoxy-3-(dimethylamino)-beta-d-xylo-hexopyranosyl]oxy}oxacyclohexadeca-4,6,14-trien-3-yl]methyl 6-deoxy-2-o-methyl-beta-d-allopyranoside	C36H59NO11									660014	8.81176e+06	8.98938e+06	1.09336e+07	1.12106e+07	968115	2.11577e+06	2.17259e+07	634065	2.10845e+06	1.62158e+06	1.23646e+06	1.5108e+06	1.15627e+06	1.98306e+06	8.95808e+06	4.95923e+06	5.73638e+06	4.65437e+06	4.52409e+06	3.35368e+06	5.64699e+06	5.76505e+06
neg-4.034_230.11504	230.115	4.034	[1-cyclobutene-1,2-diylbis(oxy)]bis(trimethylsilane)	C11H18O5									280671	150061	1.0489e+06	1.77646e+06	272203	2.67379e+06	103445	477342	95678.5	115017	281444	205237	99631.5	83764.4	80806.8	67628.7	226910	226989	254212	235083	244910	270863	252205
neg-4.182_322.05076	322.051	4.182	[2-hydroxy-5-(3-phenylpropanoyl)phenyl]oxidanesulfonic acid	C15H14O6S	HMDB0135416	Phenylpropanoids and polyketides	Linear 1,3-diarylpropanoids						646478	155608	116358	811965	315032	857214	3.06614e+06	1.46575e+06	524486	510594	632835	317591	1.23048e+06	1.29522e+06	3.23116e+06	1.00111e+06	626656	639888	705705	661754	573987	606615	483419
neg-3.997_306.05591	306.056	3.997	[3-(3-phenylpropanoyl)phenyl]oxidanesulfonic acid	C15H14O5S	HMDB0135220	Phenylpropanoids and polyketides	Linear 1,3-diarylpropanoids						107248	1.0526e+06	507192	389603	729832	2.22459e+06	1.12019e+07	2.92012e+06	169323	162102	81068.8	178780	1.28882e+06	1.01908e+06	2.96615e+06	1.4706e+06	699404	919134	731467	739958	702833	851750	878028
neg-4.718_246.05584	246.056	4.718	[3-(4-methoxyphenyl)propoxy]sulfonic acid	C10H14O5S	HMDB0135750	Benzenoids	Phenol ethers						257851	830024	463951	387514	6.02745e+06	4.66497e+06	1.10918e+07	5.34372e+06	908964	324219	131722	128637	2.0021e+06	3.0413e+06	1.18562e+06	3.78181e+06	1.20765e+06	1.01147e+06	1.10352e+06	1.08328e+06	880247	1.438e+06	1.36278e+06
neg-4.152_246.05586	246.056	4.152	[3-(4-methoxyphenyl)propoxy]sulfonic acid	C10H14O5S	HMDB0135750	Benzenoids	Phenol ethers						272435	528635	289747	64904.1	654971	943896	2.74592e+06	1.51085e+06	193329	180915	60550.7	101166	324745	606266	538780	448471	391951	420941	413575	392925	379011	381427	424302
neg-3.882_334.01453	334.015	3.882	[3-(7-hydroxy-4-oxo-4h-chromen-2-yl)phenyl]oxidanesulfonic acid	C15H10O7S	HMDB0133344	Phenylpropanoids and polyketides	Flavonoids						778409	1.7429e+06	3.65026e+06	2.36751e+06	653353	1.54315e+06	444241	653741	2.00865e+06	1.31103e+06	714314	1.61302e+06	195062	370083	2.32689e+06	1.12692e+06	1.98149e+06	2.08674e+06	2.10494e+06	1.99994e+06	2.13615e+06	2.24576e+06	2.30026e+06
neg-6.041_593.33008	593.33	6.041	phoha-pe	C28H52NO10P									5.00233e+06	2.35006e+06	3.23967e+06	4.00212e+06	4.05629e+06	4.84628e+06	4.08181e+06	2.40914e+06	2.00789e+06	2.37792e+06	2.21665e+06	3.64786e+06	2.70389e+06	2.74386e+06	1.61554e+06	2.59579e+06	2.23524e+06	2.20125e+06	2.4994e+06	2.00182e+06	2.21718e+06	2.20084e+06	1.99908e+06
neg-4.25_408.05064	408.051	4.25	[4-(5-hydroxy-7-methoxy-8-methyl-4-oxo-4h-chromen-3-yl)-2-methoxyphenyl]oxidanesulfonic acid	C18H16O9S	HMDB0129590	Phenylpropanoids and polyketides	Isoflavonoids						2.80436e+06	7.17913e+06	2.14619e+06	2.64426e+06	1.39211e+06	3.3563e+06	1.15942e+07	8.4357e+06	3.46884e+06	3.14792e+06	2.87582e+06	2.1977e+06	2.48783e+06	3.14859e+06	5.24881e+06	2.64467e+06	3.61096e+06	3.29337e+06	3.38215e+06	3.04739e+06	3.37623e+06	3.46059e+06	3.67173e+06
neg-3.096_917.18594	917.186	3.096	[5-(6-aminopurin-9-yl)-2-[[[[4-[[3-[2-(3-cyclohexyl-2-hydroxy-propanoyl)sulfanylethylamino]-3-oxo-propyl]amino]-3-hydroxy-2,2-dimethyl-4-oxo-butoxy]-oxido-phosphoryl]oxy-oxido-phosphoryl]oxymethyl]-4-hydroxy-tetrahydrofuran-3-yl] phosphate	C45H37N5O13P2									371668	226257	153853	267283	627708	1.37666e+06	261095	156725	934227	216991	316628	217620	187814	197586	210480	413868	297686	303228	292397	232147	281708	313719	334520
pos-3.078_917.18503	917.185	3.078	[5-(6-aminopurin-9-yl)-2-[[[[4-[[3-[2-(3-cyclohexyl-2-hydroxy-propanoyl)sulfanylethylamino]-3-oxo-propyl]amino]-3-hydroxy-2,2-dimethyl-4-oxo-butoxy]-oxido-phosphoryl]oxy-oxido-phosphoryl]oxymethyl]-4-hydroxy-tetrahydrofuran-3-yl] phosphate	C39H38N9O12P3									2.55665e+06	400321	467378	828817	1.96649e+06	5.825e+06	894558	683337	1.57062e+06	344511	691171	711039	669626	890495	511148	623635	673121	623150	571153	743597	664569	660253	781993
neg-3.915_364.02489	364.025	3.915	[5-(7-hydroxy-4-oxo-4h-chromen-2-yl)-2-methoxyphenyl]oxidanesulfonic acid	C16H12O8S	HMDB0133321	Phenylpropanoids and polyketides	Flavonoids						646236	652700	455912	166541	121482	569331	2.80435e+06	442014	212480	150274	80037.3	230069	34828	93950.1	838629	284452	328974	334919	363489	309713	307677	410544	372349
neg-4.504_458.25142	458.251	4.504	[6]-gingerdiol 4'-o-beta-d-glucopyranoside	C23H38O9	HMDB0036122	Organic oxygen compounds	Organooxygen compounds						1.78613e+07	3.75768e+06	5.81632e+06	6.23334e+06	3.3357e+06	5.76171e+06	6.09454e+06	5.60658e+06	3.1479e+06	3.5445e+06	2.47417e+06	3.43536e+06	2.48523e+06	7.04477e+06	2.97782e+06	2.76568e+06	2.9734e+06	3.16905e+06	3.16083e+06	3.92402e+06	3.5625e+06	3.08017e+06	3.69222e+06
neg-4.872_294.18265	294.183	4.872	[6]-gingerol	C17H26O4	HMDB0005783	Benzenoids	Phenols	C10462	Metabolism|Metabolism	Biosynthesis of other secondary metabolites|Global and overview maps	Stilbenoid, diarylheptanoid and gingerol biosynthesis|Biosynthesis of secondary metabolites	map00945|map01110	1.09538e+07	3.06924e+06	6.51268e+06	9.79332e+06	5.5374e+07	2.16138e+07	1.90159e+07	7.95834e+06	2.44126e+06	6.72844e+06	4.73615e+06	4.43566e+06	8.80423e+06	8.34263e+06	4.36056e+06	3.4322e+06	1.33559e+07	1.07845e+07	9.88747e+06	9.34279e+06	6.95209e+06	7.56954e+06	7.12149e+06
pos-4.85_299.28142	299.281	4.85	[fa(16:2)]n-hexadecyl-ethanolamine	C18H37NO2									1.8363e+07	1.65647e+06	6.00864e+06	2.68462e+06	1.80191e+07	4.16858e+06	4.89346e+06	2.21873e+07	5.00143e+06	1.52372e+06	1.59169e+06	5.1817e+06	1.7419e+07	2.51123e+07	2.00033e+07	1.3533e+07	7.37846e+06	8.85059e+06	7.63629e+06	8.12461e+06	1.16727e+07	1.0032e+07	7.92298e+06
pos-7.229_299.2816	299.282	7.229	[fa(16:2)]n-hexadecyl-ethanolamine	C18H37NO2									2.8929e+08	4.53615e+07	3.89578e+07	2.14816e+07	1.09254e+08	9.49105e+07	8.66933e+07	5.66555e+07	2.09567e+07	1.28378e+07	3.14239e+07	1.08212e+07	1.52644e+07	1.32228e+07	1.57978e+07	2.32923e+07	3.1842e+07	3.01176e+07	3.04039e+07	3.23889e+07	3.02092e+07	2.61533e+07	2.27043e+07
neg-6.619_296.23469	296.235	6.619	[fa(18:0)]12r_13s-epoxy-9z-octadecenoicacid	C18H32O3									2.60202e+06	629669	1.01522e+06	1.45906e+06	2.91439e+06	1.33765e+06	901157	762323	1.86225e+06	1.66535e+06	1.35703e+06	1.33637e+06	1.09623e+06	769717	636842	594692	856549	761690	820191	830597	877100	788288	829432
pos-7.339_296.23444	296.234	7.339	[fa(18:0)]12r_13s-epoxy-9z-octadecenoicacid	C18H32O3									1.58764e+07	1.55636e+07	4.05093e+07	3.56527e+07	6.49222e+06	1.69994e+07	9.84441e+06	7.65297e+06	9.55787e+06	2.51424e+07	1.25022e+07	1.18817e+07	1.62978e+07	1.55598e+07	2.31751e+07	1.79674e+07	2.01087e+07	1.94267e+07	1.75715e+07	2.05723e+07	1.65425e+07	1.24748e+07	1.27481e+07
neg-6.359_296.23475	296.235	6.359	[fa(18:0)]12r_13s-epoxy-9z-octadecenoicacid	C18H32O3									532926	1.03263e+06	3.40031e+06	2.50586e+06	355467	990297	278242	907112	811554	1.5089e+06	489872	1.26327e+06	2.09209e+06	1.0459e+06	1.79879e+06	1.63032e+06	1.1991e+06	1.11633e+06	1.05516e+06	1.12179e+06	1.09262e+06	1.22225e+06	1.06122e+06
pos-5.142_296.23424	296.234	5.142	[fa(18:0)]12r_13s-epoxy-9z-octadecenoicacid	C18H32O3									6.23036e+06	7.33508e+06	1.10892e+07	1.51359e+07	1.11482e+06	5.25127e+06	1.86253e+06	1.28124e+06	1.71383e+06	4.83584e+06	2.67834e+06	3.97522e+06	9.11061e+06	5.98302e+06	5.79237e+06	6.87272e+06	5.52121e+06	6.34244e+06	6.46751e+06	6.75423e+06	6.95622e+06	6.10052e+06	6.5104e+06
pos-4.995_278.22399	278.224	4.995	[fa(18:1)]9z-octadecen-12-ynoicacid	C18H30O2									685857	955960	1.28973e+06	3.37453e+06	1.85069e+06	2.37775e+06	1.3776e+06	1.34406e+06	686865	445453	479562	490359	982299	882344	511048	784740	627266	623063	524913	600931	494634	517610	521009
pos-5.939_278.22399	278.224	5.939	[fa(18:1)]9z-octadecen-12-ynoicacid	C18H30O2									5.86725e+06	2.01281e+06	4.2694e+06	7.63312e+06	1.81716e+06	5.4712e+06	2.03562e+06	2.41196e+06	1.17895e+06	1.60519e+06	1.93565e+06	2.31455e+06	2.21853e+06	3.37098e+06	2.22737e+06	1.88106e+06	2.0385e+06	2.29944e+06	1.88096e+06	1.9994e+06	2.05176e+06	2.31522e+06	1.73089e+06
pos-7.415_278.22387	278.224	7.415	[fa(18:1)]9z-octadecen-12-ynoicacid	C18H30O2									7.70285e+06	1.0926e+07	1.80273e+07	3.37581e+07	2.57271e+06	2.00862e+07	7.09107e+06	6.37377e+06	1.17074e+07	1.64657e+07	1.71485e+07	1.512e+07	9.43538e+06	7.67918e+06	1.15521e+07	1.22847e+07	1.22992e+07	1.08075e+07	1.15579e+07	1.37144e+07	9.70386e+06	8.87202e+06	7.55688e+06
pos-5.853_278.22382	278.224	5.853	[fa(18:1)]9z-octadecen-12-ynoicacid	C18H30O2									1.33837e+08	1.66983e+07	5.53571e+07	7.3839e+07	1.57244e+07	5.48122e+07	1.62828e+07	4.52086e+07	1.18677e+07	1.69384e+07	2.0835e+07	2.37314e+07	1.78713e+07	5.83543e+07	1.352e+07	1.40373e+07	2.3561e+07	2.46166e+07	2.29947e+07	2.11042e+07	2.2692e+07	2.21558e+07	1.85964e+07
pos-7.341_278.22383	278.224	7.341	[fa(18:1)]9z-octadecen-12-ynoicacid	C18H30O2									1.58913e+07	1.57249e+07	3.17707e+07	3.29411e+07	8.28924e+06	1.70508e+07	1.03516e+07	7.44695e+06	9.74759e+06	2.49022e+07	1.17178e+07	1.20783e+07	1.64397e+07	1.40304e+07	1.95594e+07	1.88058e+07	1.70484e+07	2.29827e+07	1.59363e+07	1.64955e+07	1.50369e+07	1.20357e+07	1.18233e+07
pos-5.12_278.22384	278.224	5.12	[fa(18:1)]9z-octadecen-12-ynoicacid	C18H30O2									1.01587e+07	6.99535e+06	8.05334e+06	1.06648e+07	2.69056e+06	3.94931e+06	2.37646e+06	2.15546e+06	6.84391e+06	3.64644e+06	2.64622e+06	3.33434e+06	6.23579e+06	4.78553e+06	3.54801e+06	5.68538e+06	5.51779e+06	4.27955e+06	4.1166e+06	4.79282e+06	4.13314e+06	3.94815e+06	4.11323e+06
pos-6.349_278.22388	278.224	6.349	[fa(18:1)]9z-octadecen-12-ynoicacid	C18H30O2									2.55784e+07	3.78487e+07	7.24503e+07	5.84517e+07	2.9323e+06	2.155e+07	1.23156e+07	1.14098e+07	1.24486e+07	4.14865e+07	1.57559e+07	2.57769e+07	6.13546e+07	2.81456e+07	5.07893e+07	5.29039e+07	3.64924e+07	3.64867e+07	3.59413e+07	3.24083e+07	3.25118e+07	3.01684e+07	3.06489e+07
pos-5.587_278.22387	278.224	5.587	[fa(18:1)]9z-octadecen-12-ynoicacid	C18H30O2									4.78817e+06	2.76981e+06	9.47372e+06	1.25347e+07	762546	4.38452e+06	938662	163792	2.28863e+06	2.89704e+06	3.38264e+06	3.35048e+06	1.98675e+06	2.0315e+06	1.42667e+06	971518	3.01994e+06	3.04522e+06	2.8683e+06	3.26459e+06	3.11586e+06	3.20959e+06	3.02301e+06
pos-6.139_280.23931	280.239	6.139	[fa(18:2)]9z_11e-octadecadienoicacid	C18H32O2									1.0068e+06	1.09684e+06	2.90169e+06	1.3748e+06	528488	2.6992e+06	1.70784e+06	1.7886e+06	242116	706606	1.10149e+06	190149	1.09174e+06	886402	856937	844789	567241	890916	663756	530295	555632	558363	528127
neg-5.486_280.23972	280.24	5.486	[fa(18:2)]9z_11e-octadecadienoicacid	C18H32O2									2.82793e+06	4.90561e+06	628909	1.2481e+06	3.62782e+06	1.45849e+06	1.51646e+06	3.26019e+06	2.84312e+06	1.55521e+06	3.32012e+06	2.48636e+06	1.24944e+06	2.18824e+06	1.72986e+06	3.09374e+06	1.46595e+06	1.80075e+06	2.16695e+06	1.70922e+06	1.45682e+06	1.80634e+06	1.7137e+06
pos-6.979_280.23946	280.239	6.979	[fa(18:2)]9z_11e-octadecadienoicacid	C18H32O2									1.10869e+06	1.41283e+06	2.14954e+06	758903	445915	761943	417266	1.49077e+06	386569	616294	252733	292591	473020	665878	1.89679e+06	500708	540346	580749	539094	691578	530690	383707	313582
pos-3.31_588.33109	588.331	3.31	(1'r,2r,4s,4's,5s,6r,8'r,10'e,12's,13's,14'e,16'e,20'r,21'r,24's)-4,12',21',24'-tetrahydroxy-6-isopropyl-5,11',13',22'-tetramethyl-3,4,5,6-tetrahydro-2'h-spiro[pyran-2,6'-[3,7,19]trioxatetracyclo[15.6.1.1~4,8~.0~20,24~]pentacosa[10,14,16,22]tetraen]-2'-one	C33H48O9									220269	515740	851643	507036	486033	396969	1.25749e+06	258993	1.30904e+06	1.02576e+06	1.46458e+06	886155	2.14366e+06	960525	840771	739149	505450	464436	368711	532912	685886	654298	444665
neg-4.601_588.24958	588.25	4.601	pentigetide	C22H36N8O11	HMDB0038221	Phenylpropanoids and polyketides	Isoflavonoids						7.66303e+06	6.37351e+06	597662	803574	105819	1.50741e+06	7.71332e+06	9.50257e+06	2.81056e+06	1.38049e+06	678345	2.0286e+06	3.0984e+06	2.16316e+06	1.1886e+06	5.67245e+06	2.48139e+06	2.37214e+06	2.99655e+06	2.64888e+06	2.63233e+06	2.48833e+06	2.54119e+06
neg-4.376_588.24942	588.249	4.376	pentigetide	C22H36N8O11	HMDB0038221	Phenylpropanoids and polyketides	Isoflavonoids						677501	239613	43892.6	191911	117974	92245.7	452026	71958.2	383946	182212	111754	226278	3.92389e+06	3.16267e+06	1.91123e+06	3.4988e+06	1.30898e+06	1.71707e+06	1.53816e+06	1.6085e+06	1.47377e+06	1.44255e+06	1.63496e+06
neg-7.252_579.39	579.39	7.252	pe(12:0/12:0)	C29H58NO8P									1.99025e+06	3.17339e+06	3.71657e+06	3.63013e+06	1.11454e+06	1.13246e+06	961885	809296	996826	4.74132e+06	2.41903e+06	1.59664e+06	2.01342e+06	5.07833e+06	5.30058e+06	5.65934e+06	4.14571e+06	4.22816e+06	4.2983e+06	4.06956e+06	4.21951e+06	3.20741e+06	3.20921e+06
neg-6.503_579.38969	579.39	6.503	pe(12:0/12:0)	C29H58NO8P									1.1236e+06	3.42948e+06	4.14679e+06	4.70308e+06	1.07463e+06	783732	1.25719e+06	605703	1.14587e+06	3.05288e+06	2.10179e+06	1.97791e+06	837634	1.58217e+06	1.9283e+06	1.68088e+06	1.60013e+06	1.76955e+06	1.8517e+06	2.04764e+06	1.64099e+06	1.77443e+06	1.49618e+06
neg-3.312_578.25752	578.258	3.312	withaperuvin h	C30H42O9S	HMDB0034061	Lipids and lipid-like molecules	Steroids and steroid derivatives						38378.6	290993	1.05835e+06	2.0285e+06	449206	654755	349402	646290	565695	803609	629109	377697	3.90908e+06	1.33703e+06	1.06726e+06	851545	672246	617676	571735	324768	605641	594073	417194
pos-6.314_276.20811	276.208	6.314	[fa(18:4)]6z_9z_12z_15z-octadecatetraenoicacid	C18H28O2									7.80453e+06	2.64369e+06	6.29382e+06	1.76112e+06	1.53865e+06	7.48096e+06	2.02522e+07	1.04227e+07	6.14846e+06	6.46523e+06	7.05597e+06	9.41487e+06	3.66184e+06	7.54809e+06	1.1034e+07	7.90025e+06	7.40876e+06	7.30593e+06	6.63241e+06	7.58462e+06	7.50546e+06	6.93892e+06	6.8661e+06
pos-5.151_276.20772	276.208	5.151	[fa(18:4)]6z_9z_12z_15z-octadecatetraenoicacid	C18H28O2									1.02527e+07	633425	4.75914e+06	5.14489e+06	9.05811e+06	4.88648e+06	1.88441e+06	1.91403e+06	460657	1.11259e+06	2.16588e+06	1.08289e+06	1.1857e+06	1.74632e+06	300743	893881	2.53032e+06	3.00339e+06	2.90904e+06	2.36934e+06	1.97853e+06	1.57572e+06	1.58851e+06
pos-6.853_276.20813	276.208	6.853	[fa(18:4)]6z_9z_12z_15z-octadecatetraenoicacid	C18H28O2									7.93992e+06	9.62233e+06	8.62971e+06	1.22025e+07	1.63719e+06	1.83464e+07	1.01648e+07	1.45518e+06	4.53841e+06	7.28669e+06	4.59113e+06	5.5433e+06	7.2956e+06	6.75448e+06	1.08571e+07	1.13297e+07	7.41167e+06	7.08785e+06	6.85989e+06	7.7292e+06	6.24497e+06	7.52916e+06	7.04138e+06
pos-4.892_276.20787	276.208	4.892	[fa(18:4)]6z_9z_12z_15z-octadecatetraenoicacid	C18H28O2									1.61484e+06	3.5747e+06	4.32599e+06	8.85114e+06	2.05152e+06	1.8967e+06	1.7344e+06	178046	692328	483774	659098	599161	877912	1.47302e+06	454021	1.072e+06	1.24376e+06	1.22172e+06	1.06991e+06	1.23608e+06	793290	804264	1.14048e+06
pos-6.591_320.23427	320.234	6.591	[fa(20:3)]11_12-epoxy-5z_8z_14z-eicosatrienoicacid	C20H32O3									1.94401e+06	386487	1.1487e+06	3.06521e+06	1.1963e+06	2.10545e+06	1.35323e+06	6.02062e+06	507574	245203	790253	644349	449953	1.08883e+06	823928	436362	511322	642186	533972	589717	570016	501451	661709
pos-4.946_320.23421	320.234	4.946	[fa(20:3)]11_12-epoxy-5z_8z_14z-eicosatrienoicacid	C20H32O3									2.97757e+06	4.21268e+06	5.17592e+06	1.07041e+07	397163	7.73057e+06	1.02489e+06	3.12476e+06	2.85555e+06	3.04696e+06	4.8115e+06	3.2635e+06	1.14984e+06	931483	518418	535736	3.59286e+06	3.1458e+06	2.73331e+06	3.87613e+06	3.82975e+06	3.0081e+06	2.68684e+06
pos-5.912_320.23428	320.234	5.912	[fa(20:3)]11_12-epoxy-5z_8z_14z-eicosatrienoicacid	C20H32O3									5.51434e+07	3.74707e+07	9.67022e+07	9.51362e+07	1.48693e+07	6.89545e+07	3.28027e+07	1.64607e+07	2.19907e+07	4.27515e+07	5.11491e+07	3.88172e+07	3.42993e+07	1.57952e+07	1.79758e+07	1.75225e+07	3.19094e+07	3.81771e+07	3.27166e+07	3.29363e+07	3.31262e+07	2.81114e+07	2.74887e+07
neg-5.8_320.23435	320.234	5.8	[fa(20:3)]11_12-epoxy-5z_8z_14z-eicosatrienoicacid	C20H32O3									1.43597e+06	1.10157e+06	1.20698e+07	2.17056e+07	1.42201e+06	2.92947e+06	2.36358e+06	1.08554e+06	1.76446e+06	2.14775e+06	5.84708e+06	4.12308e+06	871702	2.62924e+06	1.1146e+06	640851	2.80142e+06	2.69412e+06	2.84458e+06	2.35807e+06	2.64281e+06	2.91022e+06	2.68425e+06
pos-7.145_349.29689	349.297	7.145	[fa(20:3)]n-(8z_11z_14z-eicosatrienoyl)-ethanolamine	C22H39NO2									3.92973e+06	425831	592571	1.50073e+06	2.52476e+06	1.9566e+06	1.32421e+06	939295	548868	451692	912311	262650	428912	162349	144361	390098	554779	461710	604007	507122	565891	440775	433470
pos-4.557_318.21854	318.219	4.557	[fa(20:4)]17r_18s-epoxy-5z_8z_11z_14z-eicosatetraenoicacid	C20H30O3									5.39551e+07	3.61642e+06	6.11907e+07	19463980	4.21052e+07	1.22664e+08	1.27537e+08	1.19448e+08	3.74289e+07	1.95076e+07	5.02159e+07	3.12815e+07	9.11661e+06	4.2979e+07	1.07208e+07	1.40997e+07	2.96404e+07	2.83415e+07	2.53844e+07	2.69711e+07	2.62878e+07	2.51327e+07	2.51225e+07
pos-6.35_318.21845	318.218	6.35	[fa(20:4)]17r_18s-epoxy-5z_8z_11z_14z-eicosatetraenoicacid	C20H30O3									1.06961e+07	1.35255e+06	4.16596e+07	1.91136e+07	2.96048e+07	1.96252e+07	4.9696e+07	7.48045e+07	7.70896e+06	1.11627e+07	1.52876e+07	7.31062e+06	4.31899e+06	1.99584e+07	1.41075e+07	1.29145e+07	1.62096e+07	1.79387e+07	1.38526e+07	1.21178e+07	1.20098e+07	9.44391e+06	9.87059e+06
pos-4.298_318.21854	318.219	4.298	[fa(20:4)]17r_18s-epoxy-5z_8z_11z_14z-eicosatetraenoicacid	C20H30O3									1.21021e+07	1.20414e+06	1.58769e+06	3.01487e+06	2.47945e+06	2.01416e+06	1.03423e+07	1.33722e+06	5.87529e+06	3.7935e+06	5.53251e+06	8.9715e+06	7.14342e+06	4.57719e+06	3.20194e+06	3.0608e+06	3.80183e+06	3.59127e+06	4.04705e+06	3.58046e+06	3.01866e+06	2.89889e+06	3.69506e+06
pos-5.902_318.21855	318.219	5.902	[fa(20:4)]17r_18s-epoxy-5z_8z_11z_14z-eicosatetraenoicacid	C20H30O3									5.60578e+08	2.4299e+08	4.34366e+08	4.07691e+08	1.04876e+08	3.50405e+08	5.21147e+07	9.85296e+07	1.428e+08	1.3825e+08	1.3495e+08	2.14231e+08	9.0247e+08	4.9795e+08	2.29309e+08	1.16202e+08	2.45495e+08	2.36261e+08	2.52972e+08	2.34573e+08	2.13351e+08	2.29568e+08	2.15527e+08
neg-5.777_318.21879	318.219	5.777	[fa(20:4)]17r_18s-epoxy-5z_8z_11z_14z-eicosatetraenoicacid	C20H30O3									3.89246e+08	4.98588e+08	5.54718e+08	5.46744e+08	1.47314e+08	2.38977e+08	5.18606e+07	1.48487e+08	2.24577e+08	2.20346e+08	2.44414e+08	236818538	9.17595e+08	743814617	4.13626e+08	3.07665e+08	3.26865e+08	3.82424e+08	3.28613e+08	3.22143e+08	3.53698e+08	3.38573e+08	3.25922e+08
neg-5.37_304.23978	304.24	5.37	[fa(20:4)]5z_8z_11z_14z-eicosatetraenoicacid	C20H32O2									1.1617e+06	1.60285e+06	666542	688427	3.83973e+06	1.32838e+06	4.18443e+06	1.51927e+06	4.25818e+06	1.25298e+06	1.72168e+06	1.70828e+06	863755	1.22346e+06	1.17936e+06	1.94707e+06	1.39878e+06	1.27276e+06	1.18536e+06	1.13292e+06	1.14846e+06	1.18755e+06	1.19599e+06
pos-6.26_304.23935	304.239	6.26	[fa(20:4)]5z_8z_11z_14z-eicosatetraenoicacid	C20H32O2									1.86675e+07	3.08709e+06	1.17386e+07	2.01464e+07	5.62906e+06	1.27955e+07	5.29419e+06	2.46104e+07	4.60528e+06	4.1935e+06	7.40593e+06	3.05834e+06	3.43231e+06	1.75382e+07	2.08935e+06	2.41512e+06	6.93643e+06	6.43795e+06	5.13698e+06	5.2905e+06	5.62677e+06	3.93149e+06	4.43476e+06
pos-6.314_304.2394	304.239	6.314	[fa(20:4)]5z_8z_11z_14z-eicosatetraenoicacid	C20H32O2									6.21384e+06	5.52052e+06	2.47844e+06	9.07784e+06	5.56005e+06	5.59272e+06	1.8705e+06	6.89338e+06	2.44906e+06	1.58512e+06	3.92021e+06	2.3801e+06	1.13534e+06	1.70053e+06	1.77408e+06	2.56947e+06	1.58265e+06	1.80373e+06	1.70856e+06	1.9566e+06	1.9145e+06	1.64194e+06	1.55386e+06
pos-5.997_304.23949	304.239	5.997	[fa(20:4)]5z_8z_11z_14z-eicosatetraenoicacid	C20H32O2									911235	544084	3.67504e+06	8.69414e+06	937662	2.16968e+06	339287	458150	298842	341873	816815	1.26186e+06	851501	264378	446913	213590	1.15291e+06	880865	756690	728870	671065	838872	646264
neg-3.164_578.25507	578.255	3.164	withaperuvin h	C30H42O9S	HMDB0034061	Lipids and lipid-like molecules	Steroids and steroid derivatives						2.6203e+06	2.00241e+06	2.96155e+06	2.16969e+06	2.33195e+06	838840	858464	1.34623e+06	1.1333e+06	1.37781e+06	2.09168e+06	1.3201e+06	2.19866e+06	590952	371704	1.28483e+06	1.48184e+06	1.24732e+06	1.27083e+06	1.32024e+06	1.54589e+06	1.50918e+06	1.30744e+06
neg-2.256_575.05575	575.056	2.256	isopentenyladenosine-5'-triphosphate	C15H24N5O13P3				C16424	Metabolism|Metabolism|Metabolism	Metabolism of terpenoids and polyketides|Global and overview maps|Global and overview maps	Zeatin biosynthesis|Metabolic pathways|Biosynthesis of secondary metabolites	map00908|map01100|map01110	2.15903e+06	4.16673e+06	3.67886e+06	3.445e+06	4.87967e+06	4.78062e+06	1.27331e+06	2.93035e+06	4.12684e+06	2.68178e+06	5.12368e+06	7.90205e+06	6.80278e+06	3.847e+06	2.95167e+06	2.88812e+06	3.9022e+06	3.73752e+06	3.575e+06	3.81644e+06	3.3539e+06	3.08883e+06	3.02152e+06
neg-3.449_570.30132	570.301	3.449	dexamethasone cipecilate	C33H43FO7									4.28981e+06	2.37598e+06	1.12985e+06	771867	1.19194e+06	364424	715423	2.10908e+06	1.26984e+06	954608	2.08349e+06	516962	587718	460187	891430	1.92176e+06	1.19195e+06	807475	1.21105e+06	864318	823706	889575	918629
pos-6.429_565.373	565.373	6.429	pe-nme(11:0/11:0)	C28H56NO8P									4.18049e+07	390075	783185	1.75185e+06	1.26187e+06	7.18987e+06	2.6028e+06	791146	1.3898e+06	1.58067e+06	3.75318e+06	1.86366e+06	1.46538e+06	3.39829e+06	1.73096e+06	916656	1.69499e+06	1.98929e+06	1.82868e+06	2.31325e+06	2.41102e+06	2.51674e+06	2.95656e+06
neg-7.165_399.33463	399.335	7.165	[fa]o-palmitoyl-r-carnitine	C23H45NO4									239798	58643.9	86625.8	136805	313618	176144	136537	268687	58487.8	73511.6	123430	128289	1.47294e+06	2.3859e+06	3.39921e+06	1.57272e+06	921126	1.06342e+06	904602	925384	1.11764e+06	1.05638e+06	1.01958e+06
neg-1.555_175.04758	175.048	1.555	[faamino_oxo(6:0/2:0)]2-amino-3-oxo-hexanedioicacid	C6H9NO5									4.49676e+08	2.45867e+08	1.63839e+08	1.06576e+08	6.42903e+08	4.23538e+08	2.53769e+08	2.51422e+08	163679881	2.24436e+08	1.98422e+08	2.82688e+08	3.22003e+08	1.41722e+08	2.12344e+06	1.37147e+08	1.68167e+08	1.54686e+08	1.65606e+08	1.76708e+08	1.45747e+08	1.72011e+08	1.84246e+08
pos-1.358_175.04771	175.048	1.358	[faamino_oxo(6:0/2:0)]2-amino-3-oxo-hexanedioicacid	C6H9NO5									3.75126e+07	8.67988e+06	4.47156e+06	4.10396e+06	3.41322e+07	2.85561e+07	1.46403e+07	8.67495e+06	4.94209e+06	6.79048e+06	8.43862e+06	1.49425e+07	1.84671e+07	8.60385e+06	5.94132e+06	4.25811e+06	4.81419e+06	6.0256e+06	6.31466e+06	6.10476e+06	6.35217e+06	6.39225e+06	5.84484e+06
pos-4.054_352.2239	352.224	4.054	[fadihydoxy(2:0/2:0)]6_9s-epoxy-11r_15s-dihydoxy-5z_13e-prostadienoicacid	C20H32O5									4.85921e+06	509614	2.63057e+06	1.71139e+06	2.06265e+06	9.29227e+06	5.92091e+06	3.13155e+06	1.96387e+06	1.47782e+06	2.64091e+06	2.7595e+06	1.62036e+06	1.99925e+06	826945	810098	1.62708e+06	2.14077e+06	1.96503e+06	1.85413e+06	1.81809e+06	1.94824e+06	1.66464e+06
neg-4.202_352.22444	352.224	4.202	[fadihydoxy(2:0/2:0)]6_9s-epoxy-11r_15s-dihydoxy-5z_13e-prostadienoicacid	C20H32O5									1.10415e+08	2.71786e+07	7.52695e+07	5.33663e+07	7.27826e+07	1.24344e+08	1.38148e+08	5.89537e+07	4.3747e+07	2.82702e+07	6.26715e+07	5.745e+07	2.44898e+06	9.37804e+07	3.6803e+07	3.73494e+07	4.46201e+07	4.38013e+07	4.3833e+07	4.32426e+07	4.03936e+07	4.58616e+07	4.27475e+07
pos-4.797_352.2237	352.224	4.797	[fadihydoxy(2:0/2:0)]6_9s-epoxy-11r_15s-dihydoxy-5z_13e-prostadienoicacid	C20H32O5									7.96997e+06	6.2484e+06	2.64854e+07	2.22465e+07	3.2843e+06	6.75983e+06	4.55324e+06	2.31125e+07	4.039e+06	5.46802e+06	8.89831e+06	8.26136e+06	3.61259e+06	1.24377e+07	3.7525e+06	2.76547e+06	8.93012e+06	6.66007e+06	7.07574e+06	6.01153e+06	5.68465e+06	5.76681e+06	6.80647e+06
pos-4.164_368.2188	368.219	4.164	[fadioxo_hydrox]6_9-dioxo-11r_15s-dihydroxy-13e-prostenoicacid	C20H32O6									343985	359062	845497	2.31174e+06	447236	1.93873e+06	267744	3.24246e+06	770542	467593	5.60889e+06	686095	766637	801876	259885	517125	440806	590303	556756	612941	703648	614933	581398
neg-4.381_368.21952	368.22	4.381	[fadioxo_hydrox]6_9-dioxo-11r_15s-dihydroxy-13e-prostenoicacid	C20H32O6									4.54075e+06	2.64627e+06	5.8091e+06	1.63933e+07	5.1897e+06	6.69869e+06	8.29479e+06	1.5206e+06	6.75823e+06	2.68482e+06	9.28426e+06	6.04089e+06	9.79085e+06	3.96973e+06	2.19538e+06	9.53522e+06	3.98135e+06	3.87421e+06	3.58472e+06	3.61885e+06	3.39977e+06	3.73023e+06	3.42911e+06
pos-4.618_368.21876	368.219	4.618	[fadioxo_hydrox]6_9-dioxo-11r_15s-dihydroxy-13e-prostenoicacid	C20H32O6									1.46456e+07	1.04023e+07	3.43566e+07	8.78489e+07	1.48329e+07	3.50211e+07	2.98747e+06	9.41235e+06	1.83109e+07	1.44886e+07	3.99309e+07	3.0924e+07	1.33565e+07	1.06159e+07	3.06717e+06	7.80738e+06	1.68241e+07	1.52597e+07	1.85308e+07	1.46917e+07	1.82511e+07	1.63123e+07	1.43085e+07
neg-4.629_368.21946	368.219	4.629	[fadioxo_hydrox]6_9-dioxo-11r_15s-dihydroxy-13e-prostenoicacid	C20H32O6									1.98435e+07	2.76078e+07	8.56644e+07	146943186	1.66895e+07	4.33316e+07	1.5782e+07	2.13785e+07	5.15281e+07	2.47449e+07	5.01261e+07	4.38525e+07	2.538e+07	23000882	9.35633e+06	1.34179e+07	2.61985e+07	2.71134e+07	2.80685e+07	2.9182e+07	2.34491e+07	3.41412e+07	2.24566e+07
neg-6.104_314.24565	314.246	6.104	[fahydroxy(18:0)]12_13-dihydroxy-9z-octadecenoicacid	C18H34O4									3.51195e+06	276387	208217	610546	713007	6.00737e+06	2.1901e+06	377771	440444	399618	679759	568659	1.05316e+06	844942	366326	251570	556422	609614	734484	663086	492958	542676	752824
neg-5.457_314.24565	314.246	5.457	[fahydroxy(18:0)]12_13-dihydroxy-9z-octadecenoicacid	C18H34O4									149874	260958	172998	151379	203722	347863	345051	96784.8	144312	156091	266761	288695	433987	508977	717893	566342	482886	504465	541431	412739	524818	600519	672958
pos-4.43_338.24468	338.245	4.43	[fahydroxy(20:3)]11_12-dihydroxy-5z_8z_14z-eicosatrienoicacid	C20H34O4									1.8876e+07	2.86226e+06	2.29777e+06	1.16794e+06	5.12808e+06	5.06626e+06	6.17739e+06	6.29556e+06	2.24808e+06	3.62518e+06	8.42524e+06	1.75075e+06	6.08584e+07	7.11366e+07	4.64389e+07	5.85132e+07	1.9881e+07	2.16159e+07	2.20991e+07	2.16699e+07	2.45987e+07	2.89897e+07	2.44204e+07
pos-4.95_338.24497	338.245	4.95	[fahydroxy(20:3)]11_12-dihydroxy-5z_8z_14z-eicosatrienoicacid	C20H34O4									5.40723e+06	5.40606e+06	8.33612e+06	1.6311e+07	1.8043e+06	9.381e+06	1.54903e+06	3.92542e+06	3.81846e+06	3.96921e+06	7.12326e+06	4.64018e+06	3.52791e+06	2.01383e+06	1.01367e+06	1.46185e+06	4.80149e+06	4.34683e+06	3.07298e+06	5.25512e+06	5.28176e+06	4.13376e+06	3.64895e+06
neg-6.025_338.24555	338.246	6.025	[fahydroxy(20:3)]11_12-dihydroxy-5z_8z_14z-eicosatrienoicacid	C20H34O4									2.83461e+06	3.80313e+06	6.31045e+06	8.69931e+06	385922	5.76227e+06	1.179e+06	1.64964e+06	2.70626e+06	3.04881e+06	3.29093e+06	2.37243e+06	3.81563e+06	1.51391e+06	1.43763e+06	618096	3.31399e+06	2.86932e+06	2.72051e+06	2.0701e+06	2.62915e+06	2.57998e+06	2.91169e+06
pos-5.387_338.24455	338.245	5.387	[fahydroxy(20:3)]11_12-dihydroxy-5z_8z_14z-eicosatrienoicacid	C20H34O4									3.65595e+06	1.42836e+06	1.40476e+07	7.47673e+06	1.06144e+06	5.82127e+06	1.46973e+06	628473	433424	2.34347e+06	3.79614e+06	2.62752e+06	2.23406e+06	852456	1.71051e+06	900891	1.1989e+06	1.34965e+06	1.85021e+06	1.57239e+06	1.61632e+06	1.68076e+06	1.86796e+06
neg-5.549_338.24556	338.246	5.549	[fahydroxy(20:3)]11_12-dihydroxy-5z_8z_14z-eicosatrienoicacid	C20H34O4									4.13858e+06	404288	1.13216e+06	4.74466e+06	507080	1.21645e+06	531202	1.11624e+06	438227	313062	901185	387082	262507	963159	287935	227734	540890	450163	484029	518055	458665	476519	569431
neg-6.156_338.24559	338.246	6.156	[fahydroxy(20:3)]11_12-dihydroxy-5z_8z_14z-eicosatrienoicacid	C20H34O4									1.68884e+06	3.53322e+06	6.25811e+06	1.20501e+07	713269	3.44008e+06	301052	1.98429e+06	1.86158e+06	1.93098e+06	3.36995e+06	1.48707e+06	362292	309403	402930	500303	1.97451e+06	2.01331e+06	1.92972e+06	2.05228e+06	1.69383e+06	1.64641e+06	1.54124e+06
pos-3.946_334.21332	334.213	3.946	[fahydroxy(20:4)]5s-hydroxy-12-keto-6z_8e_10e_14z-eicosatetraenoicacid	C20H30O4									2.4264e+06	813320	3.13464e+06	1.9192e+06	9.2899e+06	1.33512e+07	8.23288e+06	1.35702e+07	2.42768e+06	1.72028e+06	4.24171e+06	4.19243e+06	963319	1.71275e+06	665802	2.29123e+06	1.9908e+06	1.52639e+06	2.57863e+06	2.12807e+06	2.22533e+06	3.06615e+06	2.89877e+06
pos-4.238_334.21325	334.213	4.238	[fahydroxy(20:4)]5s-hydroxy-12-keto-6z_8e_10e_14z-eicosatetraenoicacid	C20H30O4									3.83934e+07	8.75067e+06	1.20416e+07	2.17969e+07	5.78776e+07	1.09378e+08	1.99999e+07	3.05028e+07	2.26577e+07	1.14949e+07	1.15406e+07	6.72168e+07	6.29505e+06	1.18911e+07	4.19748e+06	1.54343e+07	1.38035e+07	1.71431e+07	2.00384e+07	2.06425e+07	1.51364e+07	2.19963e+07	1.41362e+07
pos-4.361_334.21332	334.213	4.361	[fahydroxy(20:4)]5s-hydroxy-12-keto-6z_8e_10e_14z-eicosatetraenoicacid	C20H30O4									6.72147e+07	1.61513e+07	3.9525e+07	3.24937e+07	5.62503e+07	1.08983e+08	7.30693e+07	4.7244e+07	2.12844e+07	1.96626e+07	2.34074e+07	6.69492e+07	1.42062e+07	3.5722e+07	1.32453e+07	22369692	2.28444e+07	2.7381e+07	3.11472e+07	2.89669e+07	2.54834e+07	3.33537e+07	2.60263e+07
neg-4.628_334.21411	334.214	4.628	[fahydroxy(20:4)]5s-hydroxy-12-keto-6z_8e_10e_14z-eicosatetraenoicacid	C20H30O4									6.72206e+07	9.6467e+06	2.87803e+07	2.8162e+07	9.7642e+06	2.67454e+07	1.54706e+07	2.32803e+07	1.81901e+07	1.35935e+07	1.62817e+07	1.54041e+07	2.35398e+07	8.73431e+07	2.58296e+07	6.25272e+06	2.04827e+07	2.14354e+07	2.2653e+07	2.40558e+07	2.79198e+07	2.63516e+07	2.62308e+07
neg-5.211_334.21407	334.214	5.211	[fahydroxy(20:4)]5s-hydroxy-12-keto-6z_8e_10e_14z-eicosatetraenoicacid	C20H30O4									7.29489e+07	4.39072e+07	7.3e+07	1.1813e+08	2.02735e+07	5.96448e+07	2.84092e+07	2.22321e+07	4.25513e+07	4.3224e+07	7.68353e+07	5.44809e+07	7.65317e+07	9.31704e+07	5.58756e+07	4.11046e+07	4.5006e+07	4.72481e+07	4.60952e+07	4.75298e+07	5.3519e+07	4.70501e+07	5.39569e+07
neg-5.151_334.21415	334.214	5.151	[fahydroxy(20:4)]5s-hydroxy-12-keto-6z_8e_10e_14z-eicosatetraenoicacid	C20H30O4									8.19782e+07	3.4875e+07	9.34748e+07	1.2919e+08	1.56975e+07	6.07037e+07	2.80145e+07	2.68644e+07	4.14128e+07	1.44829e+07	6.33695e+07	44527238	5.10439e+07	7.22928e+07	3.05065e+07	2.29312e+07	3.75393e+07	3.60378e+07	3.83451e+07	3.84163e+07	4.02404e+07	4.20003e+07	4.02378e+07
neg-5.912_334.21403	334.214	5.912	[fahydroxy(20:4)]5s-hydroxy-12-keto-6z_8e_10e_14z-eicosatetraenoicacid	C20H30O4									682557	142194	1.0356e+06	3.2241e+06	275724	411760	238433	137994	169601	195124	451931	685860	72628	205193	100517	187897	308701	263716	241434	309239	284880	360119	333337
neg-4.444_366.20378	366.204	4.444	[fahydroxy(20:4/2:0)]5s_12r-dihydroxy-6z_8e_10e_14z-eicosatetraene-1_20-dioicacid	C20H30O6									1.78673e+07	9.13308e+06	1.09761e+07	2.59612e+07	998253	1.61654e+06	2.0391e+06	1.70029e+06	5.20634e+06	3.53702e+06	1.13265e+07	1.19347e+07	9.47833e+06	1.08351e+07	5.90922e+06	6.97678e+06	7.72515e+06	8.35924e+06	6.06275e+06	6.22466e+06	8.28253e+06	6.91042e+06	6.36162e+06
neg-1.787_190.04736	190.047	1.787	[fahydroxy_oxo(7:0/2:0)]4-hydroxy-2-oxo-heptanedioicacid	C7H10O6									297439	602793	374291	834589	4.57939e+07	1.28233e+07	9.16914e+06	2.00704e+07	1.75761e+06	3.70498e+06	1.5038e+06	1.2938e+06	7.90691e+06	3.18191e+06	1.39617e+07	2.12908e+07	3.46422e+06	3.53629e+06	3.76446e+06	3.88638e+06	5.02952e+06	5.26652e+06	5.22382e+06
neg-0.94_190.04742	190.047	0.94	[fahydroxy_oxo(7:0/2:0)]4-hydroxy-2-oxo-heptanedioicacid	C7H10O6									8.21847e+06	1.13063e+07	8.70427e+06	3.85334e+06	4.55034e+07	6.93432e+06	9.30168e+06	2.49408e+07	8.89045e+06	8.64678e+06	3.77796e+06	6.76448e+06	4.83392e+06	3.56551e+06	4.00209e+06	1.132e+07	8.6571e+06	9.23048e+06	1.16763e+07	9.47496e+06	7.99996e+06	6.26457e+06	6.66296e+06
neg-1.62_190.04739	190.047	1.62	[fahydroxy_oxo(7:0/2:0)]4-hydroxy-2-oxo-heptanedioicacid	C7H10O6									1.44434e+06	3.97075e+06	2.40313e+06	1.60106e+06	6.02162e+06	2.70826e+06	2.67693e+06	4.744e+06	2.5192e+06	3.52424e+06	2.32695e+06	1.76491e+06	2.39197e+06	982783	3.99007e+06	2.92634e+06	2.26728e+06	2.01448e+06	2.2155e+06	2.414e+06	3.24698e+06	3.69312e+06	3.01483e+06
pos-3.637_242.22491	242.225	3.637	[famethyl(14:0)]12-methyl-tetradecanoicacid	C15H30O2									908393	597028	2.17912e+06	953596	128685	111387	80877.4	85430.7	1.13348e+06	539815	272185	251383	201180	261395	188298	488592	189710	136990	146907	161341	170926	159325	137168
pos-5.31_316.2029	316.203	5.31	[faoxo(4:0)]11-oxo-5z_9_12e_14e-prostatetraenoicacid	C20H28O3									9.59152e+06	5.64783e+06	1.33102e+07	1.94005e+07	7.69113e+06	1.62355e+07	2.79494e+06	1.43767e+07	7.84287e+06	4.35853e+06	1.16432e+07	1.26204e+07	9.86657e+06	1.39216e+07	5.25464e+06	7.9508e+06	1.02073e+07	1.03258e+07	9.95866e+06	1.01536e+07	8.75224e+06	7.59107e+06	7.14079e+06
neg-5.449_316.20347	316.203	5.449	[faoxo(4:0)]11-oxo-5z_9_12e_14e-prostatetraenoicacid	C20H28O3									786855	2.36839e+06	5.57708e+06	5.78769e+06	912417	2.19756e+06	2.27191e+06	4.08846e+06	1.79615e+06	1.43097e+06	2.34689e+06	1.30381e+06	657727	3.60128e+06	2.02857e+06	1.63189e+06	2.9095e+06	2.43249e+06	2.51797e+06	2.34572e+06	2.3169e+06	2.66293e+06	1.74544e+06
neg-4.62_316.20339	316.203	4.62	[faoxo(4:0)]11-oxo-5z_9_12e_14e-prostatetraenoicacid	C20H28O3									5.37392e+06	458056	556268	1.44203e+06	750293	746508	982348	1.34144e+06	568901	296619	184409	265303	471319	7.85905e+06	910877	224626	755320	685656	771244	1.05365e+06	874598	711497	1.0394e+06
neg-6.089_316.20334	316.203	6.089	[faoxo(4:0)]11-oxo-5z_9_12e_14e-prostatetraenoicacid	C20H28O3									1.17437e+08	7.29836e+07	1.20126e+08	1.9444e+08	4.0261e+07	1.04307e+08	1.45562e+07	2.08977e+07	7.08626e+07	5.29804e+07	100415485	9.90629e+07	1.70257e+08	1.3004e+08	7.74182e+07	7.73049e+07	8.02021e+07	8.0252e+07	8.08911e+07	8.6334e+07	8.8022e+07	8.60398e+07	8.6763e+07
pos-1.363_145.0737	145.074	1.363	[faoxo_amino(6:0)]3-oxo-5s-amino-hexanoicacid	C6H11NO3									6.5849e+06	4.62215e+06	3.38299e+06	1.51192e+08	1.38286e+07	5.31754e+06	9.18512e+06	3.42821e+06	2.19659e+07	1.04152e+08	3.11537e+07	2.95022e+07	6.6313e+07	3.27843e+06	4.40478e+06	3.31548e+07	2.08181e+07	2.12218e+07	1.8152e+07	2.31997e+07	3.00586e+07	2.42667e+07	2.86865e+07
neg-4.499_330.24043	330.24	4.499	[fatrihydroxy(18:0)]9_10_13-trihydroxy-11-octadecenoicacid	C18H34O5									1.69999e+07	5.90266e+06	7.97621e+06	1.87662e+07	4.29538e+06	2.2278e+07	6.58238e+06	1.35738e+07	4.15886e+06	2.76557e+06	7.52555e+06	7.88729e+06	2.88537e+06	1.55248e+07	2.0096e+06	2.23374e+06	4.60151e+06	7.73646e+06	6.18832e+06	5.26055e+06	4.17884e+06	5.51211e+06	5.52566e+06
neg-4.308_330.24027	330.24	4.308	[fatrihydroxy(18:0)]9_10_13-trihydroxy-11-octadecenoicacid	C18H34O5									1.03794e+08	1.48298e+07	6.46093e+07	1.24169e+08	8.73766e+06	7.07158e+07	1.29646e+07	3.84143e+07	1.79354e+07	1.57288e+07	4.3868e+07	2.95442e+07	1.09357e+07	4.09996e+07	8.2939e+06	1.0469e+07	2.4274e+07	2.59268e+07	2.57601e+07	2.51137e+07	2.23059e+07	2.26109e+07	2.29528e+07
pos-4.038_354.14673	354.147	4.038	[fv]xanthohumol	C21H22O5									3.17619e+06	110746	101617	132957	400216	1.72613e+06	6.72937e+06	2.20349e+06	1.30526e+06	2.42451e+06	2.24997e+06	1.11573e+06	1.766e+06	421159	563483	495142	578018	986290	944708	833638	830778	800946	837461
neg-0.912_282.05165	282.052	0.912	[fvmethyl_hydrox]4_5-methylenedioxy-6-hydroxyaurone	C16H10O5									8.54842e+06	3.94092e+06	2.84271e+06	2.94874e+06	4.02069e+06	3.08044e+06	2.29956e+06	2.4312e+06	3.76693e+06	3.54026e+06	2.79844e+06	4.13462e+06	4.02176e+06	1.84088e+06	2.81716e+06	3.05209e+06	2.23815e+06	2.5724e+06	1.63572e+06	2.48862e+06	2.11185e+06	2.59957e+06	2.21119e+06
neg-3.713_240.07976	240.08	3.713	[pk]chrysophanicacid9-anthrone	C15H12O3									5.54957e+06	28006.1	39315.5	30121.3	143634	5.43969e+06	9.71098e+06	75201.5	27710.8	326968	379812	358888	155235	1.21091e+06	682032	25986.5	882334	942456	936886	829404	691424	915638	873956
neg-3.7_254.05775	254.058	3.7	[pk]chrysophanol	C15H10O4									24769.4	55082.8	230875	15637.8	93013.2	318950	27708.1	20470.5	14386.3	50969.8	14303.6	15918.3	15377.4	26900.3	137917	13491.1	148436	117006	103091	123113	123176	122463	95645.1
neg-4.343_352.6593	352.659	4.343	[similar to: 20-hydroxy leukotriene b4; 未mass: 0.4343 da]										51945.6	25048	17841.6	23287.3	34254.2	5.15531e+06	116444	36603.3	751494	1.03352e+06	2.09927e+06	3.19237e+06	856004	149419	757559	19013.7	455847	331043	408281	418187	464627	390256	425630
neg-4.318_353.00178	353.002	4.318	[similar to: 20-hydroxy leukotriene b4; 未mass: 0.7768 da]	C10H18Cl3NO4S									4.00153e+06	8.66938e+06	5.94272e+06	2.00664e+06	3.23829e+06	5.31249e+06	1.16897e+07	1.20406e+07	1.73853e+06	2.12651e+06	2.38789e+06	1.55149e+06	2.39181e+06	2.19171e+06	4.88835e+06	4.10731e+06	3.14441e+06	3.08033e+06	2.91074e+06	2.90878e+06	2.91619e+06	3.09244e+06	2.89298e+06
neg-4.342_705.31881	705.319	4.342	[similar to: 20-hydroxy leukotriene b4; 未mass: 353.0938 da]	C27H48N9O11P									52424.6	19523.2	18006.1	23502	34934.6	4.84771e+06	116444	36940.8	751494	1.03352e+06	2.34245e+06	3.22011e+06	856004	168495	757559	19189	455847	331043	408281	418187	464627	390256	425630
neg-5.778_386.20642	386.206	5.778	[similar to: 5(s),15(s)-dihete; 未mass: 49.9764 da]	C19H26N6O3									31335587	1.33898e+07	2.64933e+07	2.35851e+07	1.78113e+07	2.08771e+07	3.96046e+06	1.3079e+07	1.66073e+07	1.46055e+07	1.15406e+07	1.78112e+07	5.06865e+07	3.04014e+07	1.26224e+07	9.88361e+06	1.3205e+07	1.58871e+07	1.46085e+07	1.52618e+07	1.93993e+07	1.97692e+07	1.70695e+07
neg-1.368_347.00612	347.006	1.368	[similar to: adenosine 5'-monophosphate; 未mass: -0.0570 da]	C6H7N9O5P2									2.92138e+06	1.35992e+06	1.71688e+06	1.89315e+06	1.27258e+07	3.23771e+06	1.58324e+06	8.74128e+06	1.77272e+06	1.03496e+06	1.4211e+06	2.64026e+06	4.75096e+06	3.3381e+06	761681	1.78904e+06	1.85752e+06	1.86817e+06	1.9816e+06	1.71129e+06	1.97298e+06	1.39878e+06	1.84943e+06
neg-0.882_540.14524	540.145	0.882	[similar to: d-(+)-maltose; 未mass: 198.0290 da]	C15H25ClN10O10									1.80243e+07	4.35671e+08	2.74438e+08	179394537	1818913899	2032454919	1.61523e+08	8.09853e+08	1.40567e+08	8.54089e+07	4.7722e+07	2.30769e+08	3.82686e+07	1.2616e+08	1.09558e+08	3.82061e+07	2.64647e+08	249452149	2.49662e+08	2.40847e+08	2.403e+08	2.37274e+08	2.61636e+08
neg-0.868_378.09235	378.092	0.868	[similar to: d-(+)-maltose; 未mass: 35.9761 da]	C13H19ClN4O7									228553518	1305142945	1500602310	1260394800	2921216780	4556713550	8.70642e+08	2217793902	8.59448e+08	8.21e+08	646871425	1319942311	3.95704e+08	7.21188e+08	6.09313e+08	3.90451e+08	1059022623	1018596418	1061558932	1042090585	1001343823	1044093362	1246599086
neg-0.84_260.81483	260.815	0.84	[similar to: d-glucose 6-phosphate; 未mass: 0.7851 da]										2.8774e+06	1.07184e+06	1.30993e+06	1.61313e+06	7.26606e+06	3.42963e+06	2.75598e+06	3.11087e+06	431145	1.18097e+06	1.43688e+06	635576	1.41208e+06	1.47955e+06	908523	1.16894e+06	762857	604372	999723	729637	699521	563703	638311
pos-3.426_203.12905	203.129	3.426	[similar to: dl-tryptophan; 未mass: -0.9608 da]	C7H18N5P									891381	6.32199e+06	5.12838e+06	2.88442e+06	1.77776e+06	1.08789e+06	4.85364e+06	2.48707e+06	6.5106e+06	8.1148e+06	4.11038e+06	2.79138e+06	1.70323e+06	2.02205e+06	5.58691e+06	5.72627e+06	4.0538e+06	4.64787e+06	3.80136e+06	3.98125e+06	5.05179e+06	4.0115e+06	4.78736e+06
neg-3.796_461.18307	461.183	3.796	[similar to: leukotriene c4; 未mass: -164.1202 da]	C20H27N7O4S									1.97961e+06	1.51542e+06	2.32425e+06	6.06838e+06	338564	3.49193e+06	439451	1.83993e+06	942011	693125	2.21872e+06	3.77437e+06	1.53181e+06	2.68675e+06	1.10265e+06	1.27484e+06	1.52447e+06	1.38625e+06	1.59403e+06	1.37679e+06	1.36989e+06	1.50618e+06	1.47031e+06
neg-3.243_421.15202	421.152	3.243	[similar to: l-glutathione (reduced); 未mass: 114.0682 da]	C16H29N3O6P2									3.66424e+06	676225	2.12091e+06	6.09472e+06	206942	6.10934e+06	343660	1.13758e+06	1.453e+06	603816	3.09108e+06	3.66486e+06	2.04836e+06	4.10108e+06	1.16922e+06	1.35887e+06	1.67362e+06	1.59276e+06	1.60499e+06	1.67201e+06	1.67123e+06	1.73616e+06	2.02838e+06
neg-3.797_433.18786	433.188	3.797	[similar to: l-glutathione (reduced); 未mass: 126.1041 da]	C14H27N9O5S									1.07133e+06	694305	6.55453e+06	7.06029e+06	617073	3.60219e+06	470848	1.29625e+06	1.48767e+06	999329	3.6071e+06	2.81793e+06	441883	839612	582021	734234	1.3976e+06	1.34115e+06	1.26932e+06	1.27999e+06	1.1205e+06	1.56248e+06	1.29846e+06
neg-3.353_391.14131	391.141	3.353	[similar to: l-glutathione (reduced); 未mass: 84.0575 da]	C15H25N3O7S									5.03772e+06	308164	875150	3.28134e+06	143272	3.93988e+06	302881	871515	558100	268641	1.83975e+06	1.08099e+06	615376	1.69493e+06	564094	363895	871152	818685	865904	835305	814982	855042	873488
neg-4.096_667.314	667.314	4.096	[similar to: l-glutathione oxidized; 未mass: 55.1620 da]	C34H46N5O7P									1.42856e+06	3.41394e+06	3.23765e+06	3.28354e+06	368500	2.84244e+06	235239	1.08992e+06	1.25801e+06	1.22566e+06	2.29306e+06	1.07891e+07	4.51179e+06	6.18002e+06	4.82327e+06	2.93863e+06	2.1966e+06	2.22312e+06	2.16034e+06	2.1888e+06	2.17942e+06	2.17357e+06	2.30526e+06
pos-0.679_155.00658	155.007	0.679	[similar to: l-histidine; 未mass: -0.0629 da]	C2H5NO7									1.28309e+07	4.30121e+06	1.0155e+07	6.92769e+06	1.43353e+07	6.29447e+06	3.67902e+06	7.66971e+06	5.99176e+06	4.85002e+06	4.90779e+06	6.48003e+06	7.90865e+06	5.72777e+06	4.61716e+06	4.73705e+06	5.60329e+06	5.51603e+06	4.70353e+06	3.76541e+06	3.71449e+06	3.17024e+06	4.3932e+06
pos-0.681_155.58503	155.585	0.681	[similar to: l-histidine; 未mass: 0.5155 da]										2.63481e+06	1.66615e+07	1.1048e+07	9.37027e+06	7.77497e+06	8.21079e+06	3.26034e+07	1.46211e+07	1.77378e+07	1.88586e+07	1.68281e+07	1.26342e+07	9.55115e+06	9.06093e+06	1.2683e+07	1.97929e+07	1.27204e+07	1.16915e+07	1.24957e+07	1.21293e+07	1.53305e+07	1.26501e+07	1.44985e+07
pos-0.701_154.08493	154.085	0.701	[similar to: l-histidine; 未mass: -0.9845 da]										1.92496e+06	1.97947e+06	2.14828e+06	1.19868e+06	6.45149e+06	1.6223e+06	1.74157e+06	4.60783e+06	2.21223e+06	3.04063e+06	1.05125e+06	2.26204e+06	1.22471e+06	852103	2.02814e+06	2.11763e+06	2.00896e+06	2.2147e+06	1.4091e+06	2.03402e+06	2.29525e+06	2.24092e+06	2.36996e+06
pos-0.892_154.07375	154.074	0.892	[similar to: l-histidine; 未mass: -0.9957 da]	C7H10N2O2									3.01101e+07	8.66403e+07	6.09386e+07	5.92539e+07	9.22312e+07	3.41538e+07	6.56033e+07	9.93581e+07	9.24604e+07	7.00966e+07	7.42581e+07	7.12643e+07	5.28361e+07	4.65504e+07	5.84681e+07	8.44567e+07	66640362	6.62724e+07	6.15554e+07	6.56078e+07	5.87429e+07	5.8718e+07	6.09964e+07
pos-0.739_154.07142	154.071	0.739	[similar to: l-histidine; 未mass: -0.9981 da]	C3H6N8									2.45462e+07	1.11546e+06	1.53382e+06	1.27536e+06	2.10925e+07	1.37483e+07	1.32419e+07	3.14583e+06	4.79599e+06	659430	1.16381e+06	5.8038e+06	1.20187e+06	1.30186e+06	617773	552602	2.15116e+06	2.14567e+06	1.98711e+06	1.98678e+06	2.32001e+06	3.71856e+06	2.14583e+06
pos-0.667_114.95661	114.957	0.667	[similar to: l-histidine; 未mass: -40.1129 da]										1.14472e+07	3.43261e+06	1.06158e+06	9.04702e+06	1.0688e+07	1.22817e+07	7.48148e+06	4.37375e+06	2.04416e+06	1.48097e+06	7.30496e+07	5.15885e+06	7.61851e+06	7.63479e+06	3.80617e+06	2.02498e+06	3.76487e+06	3.5143e+06	5.9296e+06	5.0738e+06	5.70147e+06	4.95878e+06	5.25614e+06
neg-0.719_223.04422	223.044	0.719	[similar to: l-histidine; 未mass: 67.9747 da]	C5H9N3O7									1.15654e+06	7.47097e+06	1.34531e+07	1.32044e+07	7.12455e+06	2.88358e+06	1.01843e+06	4.59867e+06	6.23791e+06	1.11913e+07	5.85681e+06	1.26446e+07	1.31719e+07	5.26941e+06	7.51132e+06	6.59706e+06	6.0165e+06	7.0188e+06	6.33504e+06	5.89157e+06	5.38391e+06	5.78862e+06	5.96437e+06
neg-0.77_223.05649	223.056	0.77	[similar to: l-histidine; 未mass: 67.9870 da]	C6H16N3P3									6.33658e+07	1.75204e+08	1.46436e+08	2.15728e+08	2.4729e+08	321831894	8.14719e+07	1.93715e+08	2.50506e+08	2.05833e+08	2.63841e+08	308519034	3.39907e+08	2.35621e+08	1.64987e+08	1.74942e+08	1.99382e+08	1.92501e+08	1.46946e+08	1.79264e+08	1.9177e+08	136328646	1.86493e+08
pos-1.072_181.02137	181.021	1.072	[similar to: l-tyrosine; 未mass: -0.0525 da]	C8H9NP2									3.8886e+07	6.78568e+06	5.50676e+06	9.45001e+06	4.18116e+07	2.6671e+07	1.62596e+07	4.69277e+06	3.38465e+06	8.82507e+06	1.07056e+07	1.21714e+07	1.79871e+07	1.39993e+07	7.96693e+06	6.86881e+06	7.4877e+06	9.25347e+06	9.34745e+06	9.54029e+06	9.19168e+06	7.69473e+06	8.13315e+06
pos-0.897_180.11815	180.118	0.897	[similar to: l-tyrosine; 未mass: -0.9557 da]										6.67167e+06	1.12863e+07	8.38743e+06	4.8763e+06	8.45008e+06	6.52751e+06	6.39099e+06	3.82455e+06	8.42163e+06	1.35114e+07	7.83219e+06	6.61933e+06	6.18371e+06	4.32051e+06	7.34923e+06	9.20514e+06	6.04179e+06	5.75956e+06	4.48177e+06	6.14368e+06	6.58283e+06	7.25611e+06	7.36788e+06
pos-0.902_180.10028	180.1	0.902	[similar to: l-tyrosine; 未mass: -0.9736 da]	C7H16O5									5.45847e+06	1.10999e+07	3.44759e+06	2.11529e+06	6.31455e+06	4.47367e+06	3.40587e+06	2.62379e+06	5.25564e+06	2.63995e+06	1.39212e+06	3.08561e+06	3.37467e+06	3.82316e+06	8.64486e+06	7.90294e+06	5.54199e+06	5.62775e+06	3.98821e+06	5.95172e+06	5.04358e+06	5.46563e+06	2.9662e+06
pos-0.893_201.62086	201.621	0.893	[similar to: n3,n4-dimethyl-l-arginine; 未mass: -0.5221 da]										6.88687e+06	1.07972e+07	1.31024e+07	8.19665e+06	7.08729e+06	5.47479e+06	9.38715e+06	6.59904e+06	9.05934e+06	1.50401e+07	10036421	9.99672e+06	5.16264e+06	5.62534e+06	7.36616e+06	9.71349e+06	8.06584e+06	8.63195e+06	6.79165e+06	8.7691e+06	8.75371e+06	7.38114e+06	7.57029e+06
pos-0.892_403.242	403.242	0.892	[similar to: n3,n4-dimethyl-l-arginine; 未mass: 201.0990 da]	C17H33N5O6									1.48104e+07	2.37541e+07	2.60775e+07	1.75905e+07	2.01596e+07	1.20957e+07	1.92115e+07	1.43181e+07	3.19643e+07	3.695e+07	2.83184e+07	2.73444e+07	1.45069e+07	1.73223e+07	1.34476e+07	1.72837e+07	1.48388e+07	1.65601e+07	1.50918e+07	1.6322e+07	2.11926e+07	1.57781e+07	1.66961e+07
neg-3.519_259.04887	259.049	3.519	[similar to: n-acetyl-l-methionine; 未mass: 67.9873 da]	C6H9N7O3S									3.09085e+06	192847	167694	256166	6.57764e+06	2.11771e+06	294350	1.22656e+06	639686	133833	302727	1.15868e+06	823666	472950	255627	191532	296687	319476	303298	283180	311124	334558	299610
pos-1.365_122.03112	122.031	1.365	[similar to: nicotinamide; 未mass: -0.0169 da]										4.16175e+07	1.72005e+07	1.59525e+07	2.20179e+07	2.54206e+07	1.90281e+07	1.66226e+07	2.67904e+07	1.38576e+07	1.44977e+07	1.24317e+07	1.2935e+07	2.04135e+07	1.51464e+07	1.82116e+07	1.17468e+07	1.3393e+07	1.19646e+07	1.19587e+07	1.28517e+07	1.62665e+07	1.62203e+07	1.19653e+07
neg-1.288_712.22682	712.227	1.288	[similar to: 伪-cyclodextrin; 未mass: -260.0901 da]	C29H46O16P2									76089.9	2.68211e+06	2.89053e+06	3.39866e+06	4.28135e+06	6.30887e+06	113355	440377	1.94897e+06	2.29158e+06	2.14328e+06	2.64859e+06	1.0341e+06	1.61169e+06	1.93719e+06	710791	1.94904e+06	1.57462e+06	1.61045e+06	1.91601e+06	1.85376e+06	1.83311e+06	1.79741e+06
neg-0.888_550.17403	550.174	0.888	[similar to: 伪-cyclodextrin; 未mass: -422.1429 da]	C19H34O18									2.23658e+06	6.26639e+07	4.10483e+07	3.7354e+07	8.3273e+07	7.24837e+07	3.61582e+06	2.38381e+07	2.15703e+07	1.7495e+07	9.79954e+06	4.06835e+07	7.42275e+06	2.1058e+07	2.8168e+07	7.51941e+06	2.23112e+07	1.78348e+07	1.89509e+07	1.87977e+07	1.83027e+07	2.07164e+07	2.00412e+07
pos-5.112_381.26302	381.263	5.112	[sp]sphinganine-1-phosphate	C18H40NO5P									1.27859e+06	151602	355834	107572	1.42052e+06	625736	489759	561370	304687	103738	196539	246574	1.75537e+06	2.53117e+06	354381	411526	502209	456780	473308	523691	253564	381768	392616
pos-5.322_381.26552	381.266	5.322	[sp]sphinganine-1-phosphate	C18H40NO5P									4.02226e+07	1.96421e+07	3.34549e+07	2.03359e+07	3.2856e+07	3.33702e+07	2.82901e+07	1.84481e+07	1.72144e+07	2.01752e+07	1.00385e+07	2.31772e+07	1.87492e+07	2.44216e+07	2.48864e+07	1.4619e+07	2.25444e+07	1.78935e+07	1.75019e+07	1.92293e+07	1.64051e+07	1.45663e+07	1.4781e+07
pos-5.877_400.33324	400.333	5.877	[st(2:0)](5z_7e)-(3s)-9_10-seco-5_7_10(19)-cholestatriene-3_25-diol	C27H44O2									6.90643e+06	1.60064e+07	2.74027e+06	5.4005e+06	733163	2.10617e+06	1.12729e+07	2.55704e+07	8.10139e+06	7.08258e+06	2.39865e+06	3.78838e+06	6.76935e+06	4.34073e+06	2.691e+06	2.76054e+07	1.16367e+07	1.57232e+07	1.63605e+07	1.34577e+07	1.3985e+07	7.72283e+06	1.26425e+07
pos-4.231_430.30691	430.307	4.231	[st(2:0)]22s_25s-furospirost-5-en-3beta_26-diol	C27H42O4									1.58558e+07	8.18057e+06	2.67727e+06	5.12579e+06	799674	4.68418e+06	8.99188e+06	2.55389e+06	6.72513e+06	6.34807e+06	2.87747e+06	5.89268e+06	1.33733e+07	1.08917e+07	8.60728e+06	1.10902e+07	7.22393e+06	6.47865e+06	5.29395e+06	7.03414e+06	9.87671e+06	6.51444e+06	7.08602e+06
pos-5.72_288.20801	288.208	5.72	[st(2:0)]5alpha-androstane-3_17-dione	C19H28O2									3.38152e+06	845881	1.20415e+06	2.86877e+06	1.11367e+06	3.1753e+06	1.9098e+06	1.79041e+06	977549	2.09754e+06	1.1676e+07	2.2529e+06	1.77635e+06	7.14529e+06	1.76201e+06	6.04768e+06	2.05072e+06	2.38942e+06	2.08881e+06	1.88399e+06	2.88348e+06	2.20663e+06	3.83588e+06
pos-4.664_288.20779	288.208	4.664	[st(2:0)]5alpha-androstane-3_17-dione	C19H28O2									4.79664e+07	1.65977e+07	1.2045e+07	1.39199e+07	1.70087e+06	7.63945e+06	3.82414e+07	1.23985e+07	2.47603e+07	1.30696e+07	6.97198e+06	1.36319e+07	3.21872e+07	3.47241e+07	1.48334e+07	3.60419e+07	2.20963e+07	2.58803e+07	2.60264e+07	2.5452e+07	2.82195e+07	2.27896e+07	2.34762e+07
pos-5.566_288.20793	288.208	5.566	[st(2:0)]5alpha-androstane-3_17-dione	C19H28O2									1.38909e+06	1.16413e+06	3.45265e+06	2.47168e+06	368508	1.31237e+06	1.22568e+06	509786	704428	1.44202e+06	2.14218e+06	1.3607e+06	994434	1.01543e+06	764689	447225	735641	739302	790399	815239	569619	638723	534023
pos-7.113_292.23936	292.239	7.113	[st(2:0)]androstan-3beta_17beta-diol	C19H32O2									9.10487e+06	3.4372e+06	1.2166e+07	1.67652e+07	1.11069e+06	6.37599e+06	4.10367e+06	3.65721e+06	3.74201e+06	3.39755e+06	6.5447e+06	3.64834e+06	2.48374e+06	1.45206e+07	6.10317e+06	5.04899e+06	6.32534e+06	6.04925e+06	6.1749e+06	6.16768e+06	4.25919e+06	5.01196e+06	4.50543e+06
pos-6.855_292.23937	292.239	6.855	[st(2:0)]androstan-3beta_17beta-diol	C19H32O2									927947	325176	1.75458e+06	1.4323e+06	219298	310369	350644	224049	107233	262637	593628	572604	401925	1.04247e+06	712263	582256	470952	546921	614105	665167	701237	376092	481198
pos-4.948_288.17175	288.172	4.948	[st(3:0)]estra-1_3_5(10)-triene-2_4_17beta-triol	C18H24O3									4.2692e+06	309011	310485	335952	438859	7.26352e+06	5.59978e+06	566595	258382	742059	598268	1.02757e+06	1.66033e+06	838074	775587	205994	685722	665110	480868	574933	607025	741573	517077
neg-3.388_464.20237	464.202	3.388	[st(3:0)]estra-1_3_5(10)-triene-3_16alpha_17beta-triol16-d-glucuronide	C24H32O9									2.69246e+06	1.81173e+06	8.78374e+06	4.07437e+06	1.49953e+07	6.48746e+06	1.37999e+06	5.87983e+06	1.17865e+07	1.22641e+07	7.02129e+06	1.35733e+07	1.03359e+07	8.12698e+06	7.07543e+06	2.6392e+06	6.79151e+06	5.27051e+06	6.33995e+06	4.65914e+06	6.6691e+06	6.14163e+06	6.35865e+06
pos-4.7_290.22354	290.224	4.7	[sthydrox]17beta-hydroxy-5beta-androstan-3-one	C19H30O2									4.41733e+07	4.23511e+07	7.85146e+06	1.14651e+07	958949	9.59036e+06	5.46465e+07	2.17686e+07	2.25682e+07	1.68044e+07	6.45892e+06	1.61532e+07	2.4882e+07	2.67783e+07	1.51344e+07	3.94446e+07	1.53223e+07	2.26936e+07	2.24869e+07	2.34681e+07	2.12813e+07	2.07833e+07	2.01637e+07
pos-6.333_290.22372	290.224	6.333	[sthydrox]17beta-hydroxy-5beta-androstan-3-one	C19H30O2									367220	1.38971e+06	1.57547e+06	3.42941e+06	217361	638823	458506	548193	401324	290118	440008	330509	827421	629295	709955	944419	755981	875710	827543	677378	635335	724036	703097
pos-5.253_290.22364	290.224	5.253	[sthydrox]17beta-hydroxy-5beta-androstan-3-one	C19H30O2									1.31035e+06	3.08439e+06	8.78674e+06	1.34512e+07	785519	3.84595e+06	271346	1.29417e+06	2.68414e+06	3.37705e+06	5.27541e+06	4.37382e+06	1.26574e+06	1.10135e+06	989480	716883	3.5299e+06	3.07397e+06	3.27749e+06	3.4912e+06	3.1114e+06	2.09617e+06	1.68479e+06
pos-4.915_330.21841	330.218	4.915	[sthydrox]17beta-hydroxyandrost-4-en-3-one_17-acetate	C21H30O3									2.43087e+07	2.94396e+07	9.05425e+06	2.369e+07	5.03292e+06	4.61654e+07	8.56266e+06	1.4635e+07	1.78756e+07	1.27421e+07	2.61543e+07	2.09839e+07	1.62752e+07	1.74895e+07	6.20546e+06	5.74902e+06	1.32896e+07	1.12937e+07	1.34336e+07	1.10409e+07	1.03072e+07	1.00814e+07	1.10406e+07
pos-4.592_464.24111	464.241	4.592	[sthydrox]17beta-hydroxyandrost-4-en-3-one3-d-glucuronide	C25H36O8									864489	1.87759e+06	351450	300230	3.33531e+06	237636	234264	3.01641e+06	252341	202117	93556.9	453327	319396	307166	486891	633869	411622	518260	463736	586546	738635	672605	517347
pos-7.35_304.20313	304.203	7.35	[sthydrox]3beta_16alpha-dihydroxy-5-androsten-17-one	C19H28O3									970346	212402	1.30078e+06	548469	652614	757178	336613	355512	284170	370287	200723	615287	846221	708600	1.56761e+06	1.15317e+06	1.06083e+06	882381	961739	742391	842002	583650	445354
neg-5.295_304.20353	304.204	5.295	[sthydrox]3beta_16alpha-dihydroxy-5-androsten-17-one	C19H28O3									5.13123e+06	878673	1.17306e+07	2.34743e+07	989431	5.95532e+06	2.97594e+06	2.46557e+06	1.95486e+06	2.2768e+06	8.51636e+06	3.30612e+06	1.14701e+06	6.84216e+06	1.94149e+06	1.22749e+06	3.71214e+06	6.45641e+06	3.94244e+06	4.17587e+06	5.44387e+06	4.70221e+06	6.67235e+06
neg-5.655_304.20347	304.203	5.655	[sthydrox]3beta_16alpha-dihydroxy-5-androsten-17-one	C19H28O3									81969.2	541221	2.96958e+06	9.06917e+06	115612	1.82038e+06	242583	186774	506099	509650	1.64965e+06	755545	574174	1.16298e+06	734417	321288	1.24663e+06	641493	972014	1.00255e+06	1.29958e+06	1.23073e+06	1.09363e+06
neg-4.008_513.27534	513.275	4.008	[sthydrox]n-(3alpha-hydroxy-5beta-cholan-24-oyl)-glycine3-sulfate	C26H43NO7S									152268	305203	290825	124500	61197.6	150360	358867	22919.1	156512	159390	180536	375339	208715	574823	3.55914e+06	240672	1.14063e+06	1.08931e+06	1.36334e+06	1.01343e+06	949222	1.39172e+06	834788
neg-4.096_513.27537	513.275	4.096	[sthydrox]n-(3alpha-hydroxy-5beta-cholan-24-oyl)-glycine3-sulfate	C26H43NO7S									2.59443e+06	3.93933e+06	1.73722e+06	1.23696e+06	252833	678707	4.59477e+06	894535	4.13079e+06	2.44303e+06	1.87942e+06	2.19102e+06	1.26175e+06	3.03651e+06	6.27635e+06	2.38672e+06	2.66261e+06	2.76803e+06	2.69901e+06	2.72869e+06	2.84608e+06	3.21519e+06	3.54446e+06
neg-4.605_483.3011	483.301	4.605	[sthydrox]n-(3alpha-hydroxy-5beta-cholan-24-oyl)-taurine	C26H45NO5S									49841.9	50256.8	22474.4	26782.1	41974	32080.5	81436.6	55687	574568	176639	139629	106306	744212	631353	2.76018e+06	44435.6	183673	144522	186059	142387	182804	195620	219470
pos-3.793_362.20818	362.208	3.793	[sthydroxy(3:0)]5alpha-pregnan-17alpha_21-dihydroxy-3_11_20-trione	C21H30O5									1.17079e+07	1.85981e+06	625230	470810	4.79305e+06	2.6989e+06	3.18999e+07	1.65902e+06	729709	1.19181e+06	831610	1.06208e+06	754954	1.57777e+06	4.03321e+06	391892	3.17194e+06	2.60147e+06	2.11508e+06	2.64885e+06	1.91451e+06	2.64051e+06	2.26e+06
pos-3.275_362.20815	362.208	3.275	[sthydroxy(3:0)]5alpha-pregnan-17alpha_21-dihydroxy-3_11_20-trione	C21H30O5									133872	745364	494770	488592	695573	228132	357688	682067	1.503e+06	1.11057e+06	714403	215715	909937	128978	829602	768036	736800	540220	481551	554777	428841	701756	489037
pos-3.82_362.20799	362.208	3.82	[sthydroxy(3:0)]5alpha-pregnan-17alpha_21-dihydroxy-3_11_20-trione	C21H30O5									420361	962625	819285	631730	527897	1.12322e+06	275055	321255	1.10489e+06	1.6949e+06	903945	1.02896e+06	588943	402868	2.19432e+06	1.7959e+06	1.24377e+06	1.41222e+06	551320	1.39504e+06	907375	1.09523e+06	1.13545e+06
neg-4.024_362.20913	362.209	4.024	[sthydroxy(3:0)]5alpha-pregnan-17alpha_21-dihydroxy-3_11_20-trione	C21H30O5									7.35967e+06	7.87604e+06	1.90012e+07	6.31627e+07	9.7556e+06	2.80419e+06	2.37816e+07	1.00365e+06	1.07588e+07	1.34431e+06	1.75086e+07	1.91236e+06	1.59739e+07	1.86987e+07	5.32259e+06	1.65396e+07	1.34447e+07	1.33469e+07	6.81521e+06	1.32439e+07	1.2415e+07	1.30433e+07	1.20348e+07
neg-5.188_563.32187	563.322	5.188	oob-pe	C27H50NO9P									2.06545e+07	1.69766e+07	2.67252e+06	9.85598e+06	1.02133e+07	6.90891e+06	4.99399e+06	1.07113e+07	1.80147e+07	4.76635e+06	1.27897e+07	1.32187e+07	9.11769e+06	4.6319e+06	5.36718e+06	2.13541e+07	6.03739e+06	7.73707e+06	7.081e+06	7.57861e+06	5.97007e+06	7.7996e+06	7.74879e+06
neg-3.931_478.22008	478.22	3.931	[stmethoxy(2:0)]2-methoxy-estra-1_3_5(10)-triene-3_17beta-diol3-d-glucuronide	C25H34O9									456894	84692.1	83480.6	103420	33915.4	426444	318846	237849	1.09788e+06	883949	1.18683e+06	1.14635e+06	657258	775311	2.16e+06	48427.8	433065	408250	479147	544345	385853	468819	422625
pos-5.973_302.18746	302.187	5.973	[stox]3-oxo-13_17-secoandrost-4-ene-17_13alpha-lactone	C19H26O3									868118	171587	967133	3.02892e+06	398164	1.51747e+06	307628	313722	368724	165659	824190	483837	470912	1.02708e+06	189410	154965	477814	711712	515357	431347	623369	614143	556123
pos-4.792_302.18722	302.187	4.792	[stox]3-oxo-13_17-secoandrost-4-ene-17_13alpha-lactone	C19H26O3									6.95013e+06	2.15706e+06	6.54537e+06	1.3777e+07	702195	6.07195e+06	1.84145e+06	2.52029e+06	1.18084e+06	1.36963e+06	3.7804e+06	2.83149e+06	2.04651e+06	7.03269e+06	2.39315e+06	913896	3.68674e+06	3.87425e+06	3.46222e+06	4.10208e+06	3.5802e+06	2.44637e+06	2.58751e+06
neg-5.455_302.18779	302.188	5.455	[stox]3-oxo-13_17-secoandrost-4-ene-17_13alpha-lactone	C19H26O3									530581	90951.3	980548	2.48393e+06	261588	859057	183071	124276	205082	211005	674058	322245	161630	506714	204779	161820	417873	520881	458621	431932	479384	404776	389148
pos-5.603_350.24452	350.245	5.603	[sttrihydrox]3alpha_11beta_21-5alpha-trihydroxy-pregnane-20-one	C21H34O4									7.81723e+06	3.63456e+06	4.25149e+06	9.07807e+06	2.94969e+06	2.01316e+07	1.56558e+06	4.01474e+06	5.35648e+06	3.43063e+06	1.15451e+07	7.88939e+06	6.09055e+06	6.13254e+06	1.59494e+06	1.36218e+06	4.98668e+06	3.24211e+06	4.16039e+06	4.78849e+06	4.84233e+06	3.26203e+06	3.76065e+06
pos-5.534_350.24452	350.245	5.534	[sttrihydrox]3alpha_11beta_21-5alpha-trihydroxy-pregnane-20-one	C21H34O4									1.17052e+07	5.59292e+06	7.36461e+06	1.35803e+07	6.63584e+06	2.44203e+07	2.68764e+06	6.68152e+06	6.57978e+06	3.61832e+06	1.7598e+07	1.21309e+07	7.56493e+06	7.27075e+06	2.80264e+06	3.40807e+06	5.85356e+06	6.51216e+06	5.84779e+06	5.84526e+06	7.0928e+06	6.07967e+06	6.23017e+06
pos-5.199_350.2448	350.245	5.199	[sttrihydrox]3alpha_11beta_21-5alpha-trihydroxy-pregnane-20-one	C21H34O4									1.09515e+07	8.86628e+06	1.12724e+07	1.9401e+07	6.12982e+06	1.59063e+07	2.08313e+06	2.69073e+06	1.24106e+07	5.16227e+06	1.85251e+07	1.88788e+07	9.03256e+06	4.85665e+06	1.91899e+06	2.61088e+06	5.20452e+06	6.59742e+06	9.55153e+06	8.65236e+06	6.43819e+06	6.85476e+06	8.02216e+06
pos-5.911_350.24455	350.245	5.911	[sttrihydrox]3alpha_11beta_21-5alpha-trihydroxy-pregnane-20-one	C21H34O4									8.72946e+06	1.85654e+06	4.92219e+06	4.2036e+06	1.28036e+06	3.14815e+06	1.45025e+06	2.70242e+06	1.54969e+06	2.47186e+06	1.80637e+06	1.38415e+06	1.03351e+06	4.73122e+06	1.85469e+06	1.30409e+06	1.82511e+06	2.01341e+06	1.95286e+06	1.57126e+06	1.55418e+06	1.19374e+06	1.26567e+06
neg-6.111_442.16536	442.165	6.111	[sttrihydroxy(2:0)]11beta_17_21-trihydroxypregn-4-ene-3_20-dione_21-sulfate	C21H30O8S									3.69739e+07	1.20798e+08	1.82232e+08	1.66256e+08	5.65119e+07	1.555e+08	2.22893e+07	1.44348e+08	8.38798e+07	1.23169e+08	9.1315e+07	9.42977e+07	1.75154e+08	9.72944e+07	7.72659e+07	5.7735e+07	8.90772e+07	8.33808e+07	8.54729e+07	1.01e+08	6.86517e+07	7.49882e+07	6.43643e+07
pos-3.277_686.34796	686.348	3.277	{(1s,2r,3r,6e,8s,9s,12s,14e,16r)-9-[(4,6-dideoxy-3-o-methyl-beta-d-xylo-hexopyranosyl)oxy]-12-hydroxy-3,8,12-trimethyl-5,13-dioxo-4,17-dioxabicyclo[14.1.0]heptadeca-6,14-dien-2-yl}methyl 6-deoxy-2,3-di-o-methyl-beta-d-allopyranoside	C34H54O14									7.62803e+06	8.94236e+06	3.27488e+06	6.24787e+06	8.2441e+06	5.28864e+06	7.50605e+06	7.50017e+06	7.83949e+06	5.48196e+06	6.03807e+06	3.74013e+06	9.82479e+06	5.22521e+06	6.43853e+06	9.56034e+06	5.55252e+06	4.99514e+06	4.51087e+06	5.2362e+06	5.34117e+06	5.94686e+06	6.29808e+06
pos-3.213_686.34893	686.349	3.213	{(1s,2r,3r,6e,8s,9s,12s,14e,16r)-9-[(4,6-dideoxy-3-o-methyl-beta-d-xylo-hexopyranosyl)oxy]-12-hydroxy-3,8,12-trimethyl-5,13-dioxo-4,17-dioxabicyclo[14.1.0]heptadeca-6,14-dien-2-yl}methyl 6-deoxy-2,3-di-o-methyl-beta-d-allopyranoside	C34H54O14									1.41988e+06	4.81934e+06	3.52453e+06	3.67058e+06	2.10114e+06	1.73875e+06	6.39392e+06	3.84166e+06	4.43811e+06	2.71569e+06	2.73984e+06	2.22085e+06	3.71103e+06	2.63552e+06	5.18628e+06	7.84887e+06	4.32535e+06	3.38871e+06	3.62109e+06	3.6185e+06	2.75751e+06	2.94343e+06	4.70607e+06
pos-3.406_686.34864	686.349	3.406	{(1s,2r,3r,6e,8s,9s,12s,14e,16r)-9-[(4,6-dideoxy-3-o-methyl-beta-d-xylo-hexopyranosyl)oxy]-12-hydroxy-3,8,12-trimethyl-5,13-dioxo-4,17-dioxabicyclo[14.1.0]heptadeca-6,14-dien-2-yl}methyl 6-deoxy-2,3-di-o-methyl-beta-d-allopyranoside	C34H54O14									1.44598e+06	6.39695e+06	2.2126e+06	3.11037e+06	3.59847e+06	1.26652e+06	4.42738e+06	2.76027e+06	4.21806e+06	3.34848e+06	3.77697e+06	1.83e+06	4.37783e+06	2.03663e+06	6.48205e+06	6.14682e+06	3.64271e+06	3.45457e+06	3.21609e+06	3.1763e+06	2.69747e+06	4.17083e+06	3.92164e+06
neg-4.53_320.07133	320.071	4.53	{[(2e)-1-(4-methoxyphenyl)-3-phenylprop-2-en-1-yl]oxy}sulfonic acid	C16H16O5S	HMDB0135631	Phenylpropanoids and polyketides	Linear 1,3-diarylpropanoids						816992	831875	245468	201013	572961	2.03108e+06	9.60994e+06	1.7535e+06	149889	297643	242716	279384	803336	983891	1.65076e+06	493988	713891	725870	863915	662710	815151	708282	596954
neg-4.145_320.07149	320.071	4.145	{[(2e)-1-(4-methoxyphenyl)-3-phenylprop-2-en-1-yl]oxy}sulfonic acid	C16H16O5S	HMDB0135631	Phenylpropanoids and polyketides	Linear 1,3-diarylpropanoids						195826	1.19695e+06	370906	401496	906512	1.38891e+06	8.14577e+06	3.33726e+06	290083	236712	189311	266027	3.67599e+06	1.13503e+06	7.47981e+06	2.46545e+06	656646	546947	642809	831537	675268	737646	616160
neg-4.332_284.10808	284.108	4.332	{[(2z)-2-(phenylmethylidene)heptyl]oxy}sulfonic acid	C14H20O4S	HMDB0126522	Benzenoids	Benzene and substituted derivatives						347851	42992.2	25318.6	28584.5	51413.1	45429.1	85680.4	290954	82446.8	57565.3	33202.7	84633.5	156546	238120	195389	132776	367248	377535	409507	408412	318907	365824	417583
neg-5.117_563.32184	563.322	5.117	oob-pe	C27H50NO9P									2.02926e+07	6.23497e+07	6.10718e+06	1.59716e+07	3.09336e+07	1.07722e+07	1.01162e+07	1.87363e+07	3.7442e+07	9.78098e+06	1.68739e+07	1.83326e+07	1.40929e+07	1.68926e+07	1.71737e+07	4.43898e+07	1.81272e+07	1.82827e+07	1.73413e+07	1.87518e+07	1.88534e+07	1.88576e+07	1.7628e+07
neg-4.099_300.10271	300.103	4.099	{[3-hydroxy-2-(phenylmethylidene)heptyl]oxy}sulfonic acid	C14H20O5S	HMDB0126525	Phenylpropanoids and polyketides	Cinnamyl alcohols						1.32625e+06	2.00448e+06	1.27549e+06	133498	505389	2.69916e+06	2.12063e+06	868245	124788	31718.5	161521	197008	81728.6	72341.9	44029.2	67607	308919	369873	366246	330780	304375	354068	364362
neg-3.441_532.21225	532.212	3.441	{2,4-dihydroxy-3-[(1e)-3-methyl-1-buten-1-yl]phenyl}[6-(2,4-dihydroxyphenyl)-2-(2,6-dihydroxyphenyl)-6-hydroxy-4-methyl-3-cyclohexen-1-yl]methanone	C31H32O8									4.89284e+06	30608.2	34318.9	30912.3	119317	6.55698e+06	1.09598e+07	35014.2	34261.2	284314	1.13264e+06	1.34251e+06	431694	456060	250028	36403.9	553806	423358	521117	492159	445915	476379	501577
neg-0.751_366.04117	366.041	0.751	{6-hydroxy-3-[3-(3-hydroxyphenyl)-3-oxoprop-1-en-1-yl]-2-methoxyphenyl}oxidanesulfonic acid	C16H14O8S	HMDB0126071	Phenylpropanoids and polyketides	Linear 1,3-diarylpropanoids						1.82997e+07	1.95421e+06	2.92371e+06	2.24224e+06	3.33509e+06	1.0713e+06	1.18378e+06	2.7579e+06	1.42136e+06	1.76899e+06	1.92061e+06	1.36467e+06	513440	1.057e+06	1.51472e+06	2.70363e+06	1.7134e+06	1.60608e+06	1.63289e+06	1.49455e+06	2.0746e+06	2.34284e+06	2.42699e+06
neg-3.196_470.24902	470.249	3.196	1-(18-mercaptooctadecanoyl)-sn-glycerol 3-phosphate	C21H43O7PS									585253	2.67876e+06	2.45062e+06	1.81502e+06	2.17971e+06	1.0671e+06	2.09673e+06	786488	1.96674e+06	2.32709e+06	1.848e+06	1.82068e+06	1.76682e+06	1.30454e+06	1.00285e+06	1.81642e+06	1.54094e+06	1.64167e+06	2.04415e+06	1.62185e+06	1.66024e+06	2.12722e+06	1.63712e+06
pos-4.229_160.12467	160.125	4.229	1-(1-methylethenyl)-4-(1-methylethyl)benzene	C12H16	HMDB0061813	Lipids and lipid-like molecules	Prenol lipids						1.35501e+07	356073	247662	874090	1.12273e+07	1.37259e+07	8.97824e+06	1.41424e+06	2.5955e+06	821151	943567	289126	3.32207e+06	1.14673e+06	1.90086e+06	1.26949e+06	7.12378e+06	6.52091e+06	7.59061e+06	6.35179e+06	7.78682e+06	7.48929e+06	5.53067e+06
pos-4.396_160.12472	160.125	4.396	1-(1-methylethenyl)-4-(1-methylethyl)benzene	C12H16	HMDB0061813	Lipids and lipid-like molecules	Prenol lipids						1.37142e+07	1.55899e+06	1.42237e+06	2.0366e+06	1.17467e+07	1.4403e+07	9.51077e+06	3.50151e+06	3.58888e+06	1.0784e+06	3.57402e+06	2.75455e+06	3.76807e+06	2.97391e+06	2.58642e+06	1.62405e+06	7.48627e+06	6.83455e+06	7.85043e+06	6.63861e+06	8.06077e+06	7.81666e+06	5.78554e+06
pos-6.106_160.12474	160.125	6.106	1-(1-methylethenyl)-4-(1-methylethyl)benzene	C12H16	HMDB0061813	Lipids and lipid-like molecules	Prenol lipids						1.44162e+07	9.85237e+06	1.31975e+07	1.75476e+07	7.4929e+06	1.76487e+07	3.8971e+06	1.24739e+07	7.96946e+06	8.19595e+06	1.04898e+07	9.7671e+06	1.23617e+07	1.45696e+07	9.67321e+06	6.48883e+06	9.69063e+06	9.94955e+06	9.33969e+06	8.78589e+06	8.86194e+06	7.70484e+06	7.55712e+06
pos-5.573_160.12488	160.125	5.573	1-(1-methylethenyl)-4-(1-methylethyl)benzene	C12H16	HMDB0061813	Lipids and lipid-like molecules	Prenol lipids						3.95145e+06	809369	2.49877e+06	4810099	1.39626e+06	3.69498e+06	1.88983e+06	1.77302e+06	1.52081e+06	1.2501e+06	3.64666e+06	3.04767e+06	494330	1.00427e+06	516533	650139	1.65953e+06	1.25995e+06	1.24608e+06	1.38124e+06	1.17578e+06	1.20004e+06	1.02179e+06
pos-3.088_461.09482	461.095	3.088	1-(2-amino-2-oxoethyl)-4-(2-{[2-carboxy-6-(1-hydroxyethyl)-4-methyl-7-oxo-1-azabicyclo[3.2.0]hept-2-en-3-yl]sulfanyl}-1,3-thiazol-4-yl)pyridinium	C20H21N4O5S2									1.17373e+07	2.22026e+06	2.57415e+06	3.24589e+06	8.79554e+06	1.33229e+07	3.58726e+06	3.08876e+06	3.14339e+06	1.65758e+06	2.63676e+06	3.22243e+06	3.93856e+06	4.2485e+06	2.04053e+06	1.97266e+06	2.34713e+06	2.61461e+06	2.64308e+06	2.76338e+06	2.47132e+06	2.45854e+06	2.72719e+06
neg-4.898_461.09438	461.094	4.898	1-(2-amino-2-oxoethyl)-4-(2-{[2-carboxy-6-(1-hydroxyethyl)-4-methyl-7-oxo-1-azabicyclo[3.2.0]hept-2-en-3-yl]sulfanyl}-1,3-thiazol-4-yl)pyridinium	C20H21N4O5S2									7.62679e+06	5.01962e+06	1.23579e+07	1.54023e+07	155167	7.25795e+06	1.88975e+06	6.10088e+06	5.58902e+06	6.19105e+06	7.5516e+06	9.76963e+06	1.63438e+06	2.44857e+06	2.20325e+06	5.15425e+06	5.40233e+06	4.50824e+06	3.53353e+06	4.43351e+06	3.66467e+06	2.0386e+06	3.39312e+06
neg-4.369_265.04053	265.041	4.369	1-(2-chloro-4-pyridinyl)-3-(3-fluorophenyl)urea	C12H11NO4S									2.89387e+06	3.79204e+07	1.09329e+07	1.12858e+06	4.49879e+07	6.65506e+07	1.98498e+08	1.81492e+08	4.44591e+06	3.2531e+06	1.25341e+06	2.52421e+06	7.24064e+06	4.87261e+06	7.53533e+06	6.43159e+06	1.64002e+07	1.69702e+07	1.60166e+07	1.65797e+07	1.48895e+07	1.60942e+07	1.60889e+07
pos-1.511_560.27951	560.28	1.511	e-petromylidene b	C31H44O7S									298848	2.15857e+06	2.09929e+06	2.06466e+06	614178	1.04117e+06	2.54578e+06	1.55518e+06	1.84175e+06	2.59489e+06	1.3632e+06	1.34857e+06	962297	991245	1.12515e+06	2.06793e+06	1.69848e+06	1.49313e+06	1.97e+06	1.72527e+06	1.61403e+06	1.68931e+06	1.55167e+06
neg-4.047_145.05238	145.052	4.047	1(2h)-isoquinolinone	C9H7NO				C06324					978942	723389	749360	3.15296e+06	2.39448e+06	3.83944e+06	3.30417e+06	1.975e+06	4.68072e+06	3.23544e+06	4.43437e+06	1.1959e+06	1.93845e+06	2.13319e+06	1.75252e+06	1.4033e+06	1.5778e+06	1.50441e+06	1.50198e+06	1.52236e+06	1.65597e+06	1.83612e+06	1.8012e+06
neg-5.236_557.28567	557.286	5.236	perphenazine decanoate	C31H44ClN3O2S									372873	582179	1.26073e+06	681452	287457	306055	121241	114178	208525	574797	411468	1.02202e+06	692726	2.19671e+06	2.27755e+06	1.24232e+06	1.23218e+06	1.19124e+06	1.16095e+06	1.39633e+06	1.3868e+06	1.21044e+06	1.27274e+06
neg-5.933_553.31646	553.316	5.933	pe(0:0/24:6(6z,9z,12z,15z,18z,21z))	C29H48NO7P									2.04269e+07	2.08092e+07	7.5728e+06	7.86782e+06	1.10132e+07	8.35411e+06	5.45332e+06	3.31601e+06	6.03319e+06	1.4498e+07	8.64796e+06	1.37831e+07	1.20109e+07	8.44751e+06	1.43165e+07	9.94221e+06	7.7144e+06	7.6467e+06	7.43874e+06	7.91305e+06	7.8732e+06	7.22836e+06	6.64586e+06
pos-5.244_455.30076	455.301	5.244	1-(2-methoxy-13-methyl-tetradecanyl)-sn-glycero-3-phosphoethanolamine	C21H46NO7P									1.15084e+06	1.24424e+06	3.66315e+06	2.29677e+06	2.35177e+06	1.08269e+06	1.08516e+06	1.2362e+06	892939	1.15839e+06	1.0726e+06	2.05319e+06	3.37043e+06	4.84937e+06	5.37176e+06	1.82493e+06	2.09307e+06	2.07755e+06	2.15923e+06	1.93708e+06	1.61349e+06	1.77606e+06	1.56335e+06
neg-5.25_455.30095	455.301	5.25	1-(2-methoxy-13-methyl-tetradecanyl)-sn-glycero-3-phosphoethanolamine	C21H46NO7P									741135	676803	2.25352e+06	1.2968e+06	1.42436e+06	543875	655258	706570	557973	968618	885406	1.42423e+06	1.76728e+06	2.3996e+06	3.2433e+06	1.36751e+06	982111	1.00354e+06	973607	1.08016e+06	1.09763e+06	957685	1.02383e+06
neg-5.354_553.31617	553.316	5.354	pe(0:0/24:6(6z,9z,12z,15z,18z,21z))	C29H48NO7P									3.40261e+08	328101984	2.29148e+08	1.93369e+08	7.06344e+08	290289384	6.00849e+08	232822484	6.26432e+08	4.24386e+08	2.87107e+08	3.06425e+08	2.56967e+08	3.69887e+08	3.14361e+08	3.39112e+08	3.17991e+08	3.267e+08	3.10944e+08	2.99494e+08	2.88061e+08	2.67754e+08	2.76427e+08
neg-5.447_553.31603	553.316	5.447	pe(0:0/24:6(6z,9z,12z,15z,18z,21z))	C29H48NO7P									8.96888e+08	3.97843e+08	2.77309e+08	2.33124e+08	1603548999	5.52915e+08	8.2159e+08	5.06076e+08	6.9046e+08	4.0712e+08	449309574	4.41842e+08	627206421	5.6356e+08	4.55847e+08	5.17188e+08	3.98279e+08	3.8173e+08	4.18481e+08	3.77085e+08	4.29328e+08	4.00969e+08	4.02529e+08
pos-5.931_553.31553	553.316	5.931	pe(0:0/24:6(6z,9z,12z,15z,18z,21z))	C29H48NO7P									5.4197e+07	4.37855e+07	1.31358e+07	1.48351e+07	1.70691e+07	1.89587e+07	8.67516e+06	6.61904e+06	1.39807e+07	2.19053e+07	1.83397e+07	2.53062e+07	2.49299e+07	2.31634e+07	2.1014e+07	1.87697e+07	1.74188e+07	1.85265e+07	1.63091e+07	1.7919e+07	1.67705e+07	1.44619e+07	1.40083e+07
pos-5.552_553.31541	553.315	5.552	pe(0:0/24:6(6z,9z,12z,15z,18z,21z))	C29H48NO7P									3.39476e+06	8.34241e+06	2.59153e+06	3.40833e+06	723332	304290	286080	318403	1.42871e+06	361299	482037	285357	974819	1.85567e+06	814655	436931	1.14267e+06	971877	1.02872e+06	1.21661e+06	1.27753e+06	1.13396e+06	1.09473e+06
neg-7.838_597.40043	597.4	7.838	1-(2-methoxy-docosanyl)-sn-glycero-3-phosphoserine	C29H60NO9P									9.42908e+06	7.50128e+06	2.58656e+06	2.74145e+06	8.8551e+06	3.24652e+06	2.24391e+06	4.13883e+06	4.76669e+06	4.39923e+06	6.93298e+06	3.45938e+06	3.1997e+06	7.50808e+06	5.34679e+06	6.31323e+06	4.37842e+06	4.1849e+06	4.1214e+06	4.05504e+06	3.62131e+06	2.513e+06	3.15733e+06
neg-6.817_597.40061	597.401	6.817	1-(2-methoxy-docosanyl)-sn-glycero-3-phosphoserine	C29H60NO9P									3.02569e+06	1.03617e+06	3.71135e+06	2.39936e+06	2.58257e+06	2.36893e+06	1.91634e+06	1.198e+06	2.79027e+06	1.98108e+06	1.29394e+06	1.36637e+06	1.63026e+06	2.10343e+06	2.97283e+06	1.14095e+06	2.21184e+06	2.41301e+06	2.22285e+06	2.23629e+06	2.24155e+06	1.98421e+06	2.08068e+06
neg-7.025_597.40032	597.4	7.025	1-(2-methoxy-docosanyl)-sn-glycero-3-phosphoserine	C29H60NO9P									6.19956e+06	9.5292e+06	1.01825e+07	1.12791e+07	3.88442e+06	6.60322e+06	4.32029e+06	2.78247e+06	4.24441e+06	9.27244e+06	6.83436e+06	6.3052e+06	4.1239e+06	7.48761e+06	7.35032e+06	4.12654e+06	6.93119e+06	6.9532e+06	6.58419e+06	6.59599e+06	7.14169e+06	5.65577e+06	6.27678e+06
pos-6.082_525.37938	525.379	6.082	1-(2-methoxy-eicosanyl)-sn-glycero-3-phosphoethanolamine	C26H56NO7P									6.35002e+07	5.99609e+07	1.41321e+07	1.60476e+07	9.07814e+07	3.53974e+07	6.49297e+07	3.30584e+07	1.61106e+08	2.78485e+07	4.12307e+07	3.20962e+07	3.5728e+07	7.60653e+07	5.01759e+07	4.78391e+07	4.74063e+07	5.3149e+07	5.33541e+07	4.6787e+07	5.01864e+07	4.31389e+07	4.30961e+07
pos-6.46_525.37823	525.378	6.46	1-(2-methoxy-eicosanyl)-sn-glycero-3-phosphoethanolamine	C26H56NO7P									191940	83230.5	161288	94897.7	189973	216682	128571	133754	90302.2	247475	77658.1	150610	852866	2.27195e+06	3.56126e+06	571820	627676	794878	784544	824536	843747	838691	907862
pos-6.178_525.37826	525.378	6.178	1-(2-methoxy-eicosanyl)-sn-glycero-3-phosphoethanolamine	C26H56NO7P									1.91828e+07	1.63052e+07	1.61846e+07	1.26123e+07	1.29793e+07	1.38327e+07	9.03138e+06	9.77726e+06	1.3694e+07	1.32312e+07	1.31791e+07	1.09907e+07	1.17736e+07	3.71331e+07	3.93182e+07	1.66002e+07	1.81177e+07	2.03951e+07	1.78362e+07	1.91552e+07	1.68463e+07	1.68379e+07	1.6812e+07
pos-5.933_525.3783	525.378	5.933	1-(2-methoxy-eicosanyl)-sn-glycero-3-phosphoethanolamine	C26H56NO7P									1.13106e+06	4.63049e+06	3.7894e+06	5.73205e+06	1.18458e+06	1.26975e+06	1.58883e+06	910748	960001	3.49194e+06	2.62514e+06	2.70901e+06	1.08206e+07	4.12945e+06	2.97667e+06	1.40495e+06	1.1643e+07	1.21842e+07	1.2448e+07	1.11069e+07	1.15333e+07	1.1288e+07	1.08251e+07
neg-6.526_569.3686	569.369	6.526	1-(2-methoxy-eicosanyl)-sn-glycero-3-phosphoserine	C27H56NO9P									1.07603e+08	9.15027e+07	2.90021e+07	4.48797e+07	3.14974e+08	7.37323e+07	5.36472e+07	1.67179e+08	6.758e+07	4.30684e+07	9.93645e+07	8.01844e+07	1.31638e+08	2.02544e+08	1.57931e+08	3.37887e+08	1.15981e+08	1.19139e+08	1.07153e+08	124707436	1.12582e+08	1.06798e+08	1.10692e+08
neg-6.36_569.3685	569.369	6.36	1-(2-methoxy-eicosanyl)-sn-glycero-3-phosphoserine	C27H56NO9P									1.3977e+06	1.16206e+06	109630	918558	1.17822e+06	893357	373564	363445	763176	534857	631095	802425	7.69801e+06	9.17089e+06	7.38101e+06	1.23674e+07	3.12917e+06	4.31059e+06	4.24732e+06	3.50744e+06	3.60328e+06	2.87714e+06	2.94631e+06
neg-6.18_569.36904	569.369	6.18	1-(2-methoxy-eicosanyl)-sn-glycero-3-phosphoserine	C27H56NO9P									142166	85551.2	237181	302823	150358	81878.5	171174	121809	100510	299396	91792.9	177539	6.71617e+06	9.71823e+06	7.68999e+06	3.64409e+06	3.79547e+06	4.16582e+06	4.3331e+06	4.10937e+06	4.50349e+06	3.59552e+06	3.82408e+06
pos-6.996_539.39336	539.393	6.996	1-(2-methoxy-heneicosanyl)-sn-glycero-3-phosphoethanolamine	C27H58NO7P									386345	429288	410528	295517	309849	398808	231550	208484	180117	428616	352832	457548	4.23414e+06	1.12596e+07	1.4418e+07	3.8395e+06	3.57206e+06	3.23897e+06	3.69224e+06	3.62037e+06	3.346e+06	3.64273e+06	3.44019e+06
pos-6.684_539.39351	539.394	6.684	1-(2-methoxy-heneicosanyl)-sn-glycero-3-phosphoethanolamine	C27H58NO7P									1.5391e+07	2.30328e+07	2.51388e+07	1.71337e+07	5.99828e+06	8.73865e+06	9.92017e+06	5.68769e+06	5.77535e+06	1.35987e+07	1.09789e+07	7.4479e+06	2.23167e+07	8.26186e+07	7.03484e+07	2.61839e+07	3.5036e+07	3.85075e+07	3.08672e+07	3.43501e+07	3.08767e+07	3.20632e+07	2.80909e+07
neg-6.23_583.38439	583.384	6.23	1-(2-methoxy-heneicosanyl)-sn-glycero-3-phosphoserine	C28H58NO9P									2.19436e+06	1.45204e+06	2.20569e+06	1.0571e+06	1.65978e+06	2.41866e+06	2.33088e+06	325805	1.06863e+06	2.7296e+06	1.57087e+06	1.66564e+06	4.49708e+06	1.08049e+07	1.07808e+07	2.78542e+06	3.94833e+06	4.67475e+06	4.33705e+06	4.56746e+06	4.45594e+06	4.18049e+06	4.00142e+06
neg-7.267_583.38475	583.385	7.267	1-(2-methoxy-heneicosanyl)-sn-glycero-3-phosphoserine	C28H58NO9P									1.14292e+07	8.14501e+06	3.60866e+06	5.39116e+06	9.65168e+06	4.34861e+06	2.74851e+06	7.32099e+06	5.18743e+06	5.76661e+06	6.53692e+06	6.73383e+06	1.08447e+07	1.6477e+07	13682697	2.52282e+07	8.82474e+06	9.68244e+06	8.90017e+06	8.93166e+06	7.88044e+06	6.96466e+06	7.22822e+06
neg-7.063_583.38474	583.385	7.063	1-(2-methoxy-heneicosanyl)-sn-glycero-3-phosphoserine	C28H58NO9P									7.2467e+06	8.11568e+06	2.33698e+06	4.59437e+06	4.77099e+06	2.489e+06	1.70736e+06	3.28445e+06	2.57935e+06	2.85308e+06	3.48047e+06	3.10711e+06	3.57732e+06	7.14486e+06	6.71389e+06	9.93989e+06	3.92898e+06	4.39403e+06	4.45945e+06	4.07838e+06	4.06676e+06	3.09626e+06	3.69861e+06
neg-7.322_511.36333	511.363	7.322	1-(2-methoxy-nonadecanyl)-sn-glycero-3-phosphoethanolamine	C25H54NO7P									55632.7	22921.2	55844.4	42457.4	80225.3	52002.4	45922.9	43129.4	31586.5	31111	29411.9	37920.9	341693	703894	1.55767e+06	264042	442964	484148	522341	505761	441755	433992	440323
pos-5.722_511.36237	511.362	5.722	1-(2-methoxy-nonadecanyl)-sn-glycero-3-phosphoethanolamine	C25H54NO7P									2.12628e+08	2.3399e+08	3.1414e+08	2.43748e+08	9.8507e+07	1.62025e+08	1.58584e+08	1.0091e+08	1.31923e+08	2.92517e+08	2.35567e+08	2.82203e+08	3.9909e+08	1223171601	967462795	4.33343e+08	5.12523e+08	4.70216e+08	4.4681e+08	4.6828e+08	475262508	4.06714e+08	3.98311e+08
neg-5.953_555.35291	555.353	5.953	1-(2-methoxy-nonadecanyl)-sn-glycero-3-phosphoserine	C26H54NO9P									2.92664e+06	4.60969e+06	789432	1.9741e+06	3.58682e+06	1.25181e+06	317592	1.47236e+06	1.59118e+06	1.0717e+06	2.99216e+06	1.66674e+06	6.37962e+06	1.32048e+07	8.28618e+06	1.65739e+07	5.62663e+06	5.78049e+06	6.0421e+06	6.06762e+06	5.74054e+06	3.69942e+06	5.19466e+06
neg-5.381_555.35306	555.353	5.381	1-(2-methoxy-nonadecanyl)-sn-glycero-3-phosphoserine	C26H54NO9P									8.37592e+06	6.19615e+06	1.67163e+07	1.03463e+07	6.78985e+06	6.57502e+06	9.05383e+06	3.74122e+06	4.27819e+06	1.27271e+07	8.90521e+06	1.02196e+07	6.63778e+06	1.10224e+07	1.15026e+07	2.96935e+06	8.3455e+06	8.1619e+06	7.9733e+06	7.63671e+06	8.04186e+06	7.18136e+06	8.10087e+06
neg-6.131_555.35282	555.353	6.131	1-(2-methoxy-nonadecanyl)-sn-glycero-3-phosphoserine	C26H54NO9P									37391398	4.9683e+07	8.8222e+06	3.47288e+07	4.48445e+07	1.24468e+07	3.9958e+06	1.87391e+07	1.56676e+07	1.767e+07	2.65499e+07	2.01385e+07	5.40097e+07	1.15777e+08	8.98149e+07	1.85232e+08	5.731e+07	5.8853e+07	5.81286e+07	5.69416e+07	5.74244e+07	5.17253e+07	5.46634e+07
neg-6.062_555.35279	555.353	6.062	1-(2-methoxy-nonadecanyl)-sn-glycero-3-phosphoserine	C26H54NO9P									2.26146e+07	2.19781e+07	3.56513e+06	1.1059e+07	1.30172e+07	6.43516e+06	6.07907e+06	7.9812e+06	6.4312e+06	5.08915e+06	1.24937e+07	7.54846e+06	1.73177e+07	2.47551e+07	2.52114e+07	5.00216e+07	1.50141e+07	1.47985e+07	1.46863e+07	1.5795e+07	1.43002e+07	1.35288e+07	1.42984e+07
neg-5.2_555.35318	555.353	5.2	1-(2-methoxy-nonadecanyl)-sn-glycero-3-phosphoserine	C26H54NO9P									238526	685826	701590	360139	272101	251121	425394	128080	227867	493042	488512	397027	560153	1.85921e+06	1.48195e+06	589343	802091	572625	624220	676924	718479	700953	675017
neg-6.77_497.348	497.348	6.77	1-(2-methoxy-octadecanyl)-sn-glycero-3-phosphoethanolamine	C24H52NO7P									85601.8	38862.1	36068.1	44327.1	134994	72827.6	55016.1	81729.3	36425.7	33664.7	46262.5	49245.5	2.04254e+06	1.98833e+06	2.46404e+06	455708	626012	672278	608355	595376	485013	504461	487195
pos-5.057_497.34684	497.347	5.057	1-(2-methoxy-octadecanyl)-sn-glycero-3-phosphoethanolamine	C24H52NO7P									3.00469e+06	2.18415e+06	2.61174e+06	2.12827e+06	1.67871e+06	1.44555e+06	1.0056e+06	1.08896e+06	807975	1.51672e+06	1.69651e+06	2.23567e+06	2.29939e+06	4.07906e+06	2.43619e+06	2.70835e+06	1.80729e+06	2.04979e+06	1.84218e+06	1.79671e+06	2.01184e+06	1.83985e+06	1.80613e+06
neg-5.724_497.3476	497.348	5.724	1-(2-methoxy-octadecanyl)-sn-glycero-3-phosphoethanolamine	C24H52NO7P									3.07652e+07	4.08207e+07	5.29036e+07	3.72163e+07	2.06514e+07	2.21178e+07	2.25103e+07	1.72537e+07	2.45362e+07	4.9428e+07	3.34323e+07	4.55898e+07	6.46263e+07	1.56489e+08	1.65776e+08	7.97895e+07	6.96454e+07	7.24664e+07	7.37992e+07	7.39335e+07	6.58247e+07	6.71319e+07	7.04055e+07
pos-4.898_497.34706	497.347	4.898	1-(2-methoxy-octadecanyl)-sn-glycero-3-phosphoethanolamine	C24H52NO7P									177201	547468	395468	140596	85249.4	270027	75015.9	79765.4	61194.8	53508.9	179837	256147	491862	787563	538316	456209	590159	521557	425730	478581	442428	442665	400682
neg-6.952_497.34793	497.348	6.952	1-(2-methoxy-octadecanyl)-sn-glycero-3-phosphoethanolamine	C24H52NO7P									354719	169680	422876	45799.5	78415.5	148648	64879.3	64265.8	37094.4	249466	75372.1	100188	8.06477e+06	8.75043e+06	1.04189e+07	2.15559e+06	2.83063e+06	3.09108e+06	3.13094e+06	3.03108e+06	2.92662e+06	2.66892e+06	2.53247e+06
neg-3.805_154.04492	154.045	3.805	1-(2-thienyl)-1-butanone	C8H10OS	HMDB0032935	Organic oxygen compounds	Organooxygen compounds						24688.6	16638.2	18945.2	18502.6	447345	794526	2.51975e+06	978505	15485.7	16754.3	17739.5	13402.7	14601.6	22600	13609.9	14112.6	105718	99971.3	98595.4	77562.1	117806	102052	107976
pos-0.778_196.09308	196.093	0.778	1-(2-thienyl)-1-heptanone	C11H16OS	HMDB0040241	Organic oxygen compounds	Organooxygen compounds						3.14763e+08	6.12718e+07	3.77592e+07	5.87322e+07	1.70195e+08	1.24687e+08	1.02538e+08	1.30336e+08	6.58265e+07	5.02551e+07	6.51288e+07	6.05823e+07	4.94774e+07	8.14716e+07	6.66212e+07	6.78654e+07	6.05304e+07	7.96873e+07	8.17024e+07	8.01849e+07	9.11229e+07	6.06347e+07	5.90394e+07
pos-3.323_394.14925	394.149	3.323	1-(3-methyl-2-butenoyl)-6-apiosylglucose	C16H26O11	HMDB0039952	Lipids and lipid-like molecules	Fatty Acyls						2.54585e+06	341548	339123	153955	8.041e+06	1.10602e+07	3.03277e+06	3.10189e+06	2.38244e+06	277144	421669	2.63438e+06	2.14142e+06	3.07954e+06	2.05672e+06	712380	1.39196e+06	1.31066e+06	1.34959e+06	1.92599e+06	1.61169e+06	1.4739e+06	1.24118e+06
neg-3.285_394.14885	394.149	3.285	1-(3-methyl-2-butenoyl)-6-apiosylglucose	C16H26O11	HMDB0039952	Lipids and lipid-like molecules	Fatty Acyls						800187	2.08584e+06	752649	1.06599e+06	2.6045e+06	173221	81880.4	3.13742e+06	966756	786557	757063	1.00168e+06	1.12256e+06	1.25262e+06	1.15156e+06	1.48828e+06	1.12457e+06	915904	1.04789e+06	897740	1.04242e+06	1.0317e+06	1.09223e+06
pos-0.969_396.16365	396.164	0.969	1-(3-methylbutanoyl)-6-apiosylglucose	C16H28O11	HMDB0039953	Lipids and lipid-like molecules	Fatty Acyls						2.6367e+06	1.96805e+06	2.58578e+06	1.0887e+06	2.77177e+06	1.72533e+06	1.03019e+06	1.80155e+06	1.06493e+06	2.42117e+06	2.05701e+06	1.37045e+06	1.85914e+06	1.06463e+06	1.10029e+06	972153	1.40291e+06	1.04152e+06	945408	1.28209e+06	945891	969836	1.08508e+06
neg-3.165_396.16432	396.164	3.165	1-(3-methylbutanoyl)-6-apiosylglucose	C16H28O11	HMDB0039953	Lipids and lipid-like molecules	Fatty Acyls						271566	1.93219e+06	3.10263e+06	1.55712e+06	1.85809e+06	387888	1.36725e+06	1.50231e+06	2.44024e+06	4.26767e+06	2.8732e+06	2.95515e+06	796285	1.01273e+06	1.63744e+06	1.59644e+06	1.62469e+06	1.46764e+06	1.70927e+06	1.87464e+06	1.97017e+06	1.81373e+06	1.85355e+06
pos-0.894_358.14782	358.148	0.894	1-(4-hydroxy-3-methoxyphenyl)-3-oxo-5-decanesulfonic acid	C17H26O6S									9.0922e+06	4.83434e+06	2.25378e+06	4.33561e+06	7.84405e+06	8.08518e+06	3.8282e+06	4.98858e+06	6.18158e+06	5.23053e+06	3.35398e+06	4.75184e+06	5.71389e+06	3.62332e+06	6.1945e+06	6.58993e+06	2.96009e+06	3.09735e+06	3.84739e+06	2.85622e+06	3.76938e+06	5.24529e+06	4.61619e+06
neg-0.834_454.07196	454.072	0.834	1-(5'-phosphoribosyl)-5-amino-4-(n-succinocarboxamide)-imidazole	C13H19N4O12P	HMDB0000797	Nucleosides, nucleotides, and analogues	Imidazole ribonucleosides and ribonucleotides	C04823	Metabolism|Metabolism|Metabolism	Nucleotide metabolism|Global and overview maps|Global and overview maps	Purine metabolism|Metabolic pathways|Biosynthesis of secondary metabolites	map00230|map01100|map01110	7.02552e+06	2.18512e+06	483161	469042	9.02983e+06	2.92634e+06	1.33824e+06	727142	6.30406e+06	2.58847e+06	3.58979e+06	1.25602e+07	1.68479e+07	7.72358e+06	6.30992e+06	2.14464e+06	1.50294e+06	1.58721e+06	1.40827e+06	1.31236e+06	984699	788455	987622
neg-0.91_366.05716	366.057	0.91	1-(5'-phosphoribosyl)-5-formamido-4-imidazolecarboxamide	C10H15N4O9P	HMDB0001439	Nucleosides, nucleotides, and analogues	Imidazole ribonucleosides and ribonucleotides	C04734	Metabolism|Metabolism|Metabolism|Metabolism|Metabolism	Nucleotide metabolism|Chemical structure transformation maps|Chemical structure transformation maps|Global and overview maps|Global and overview maps	Purine metabolism|Biosynthesis of plant secondary metabolites|Biosynthesis of alkaloids derived from histidine and purine|Metabolic pathways|Biosynthesis of secondary metabolites	map00230|map01060|map01065|map01100|map01110	1.006e+08	7.75554e+06	1.05017e+07	1.23061e+07	1.30041e+08	3.96718e+07	2.56244e+07	2.5529e+07	1.99629e+07	1.69467e+07	1.93779e+07	3.53364e+07	9.79273e+07	3.06054e+07	1.72522e+07	2.19574e+07	1.77089e+07	1.64369e+07	1.66599e+07	1.69798e+07	1.97804e+07	1.76557e+07	1.86402e+07
neg-1.76_338.0514	338.051	1.76	1-(5-phosphoribosyl)imidazole-4-acetate	C10H15N2O9P	HMDB0006032	Organic oxygen compounds	Organooxygen compounds	C04437	Metabolism	Amino acid metabolism	Histidine metabolism	map00340	592056	463923	2.60058e+06	2.78779e+06	2.66544e+06	1.60571e+06	4.54163e+06	5.051e+06	2.06642e+06	1.00066e+06	1.28015e+06	607044	304580	1.38493e+06	1.64342e+06	3.40166e+06	1.20778e+06	1.1543e+06	1.30018e+06	1.35577e+06	1.60909e+06	1.72817e+06	1.81083e+06
neg-4.208_306.16742	306.167	4.208	1-(beta-d-glucopyranosyloxy)-3-octanone	C14H26O7	HMDB0031315	Lipids and lipid-like molecules	Fatty Acyls						1.62065e+06	3.80602e+07	1.01176e+07	7.54123e+06	4.62396e+06	6.28095e+06	2.08427e+07	2.17378e+07	4.7019e+07	1.43716e+06	2.16646e+06	1.15632e+06	2.42716e+08	1.94519e+07	3.33123e+07	217999124	2.48136e+07	2.70226e+07	2.53176e+07	2.57106e+07	2.51857e+07	2.56783e+07	2.6853e+07
pos-3.345_214.09514	214.095	3.345	1-(beta-d-ribofuranosyl)-1,2-dihydropyrimidine	C9H14N2O4									2.50795e+06	6.64868e+06	7.62566e+06	5.16352e+06	4.68289e+06	2.43817e+06	4.33833e+06	6.61937e+06	9.99992e+06	8.36005e+06	9.77742e+06	5.00935e+06	5.24082e+06	4.40158e+06	6.29711e+06	9.12384e+06	4.6609e+06	3.08135e+06	5.58109e+06	3.48809e+06	6.79724e+06	5.95875e+06	6.13611e+06
pos-0.909_214.09473	214.095	0.909	1-(beta-d-ribofuranosyl)-1,2-dihydropyrimidine	C9H14N2O4									1.28345e+07	2.01965e+07	1.14233e+07	1.4793e+07	1.6147e+07	1.05542e+07	9.598e+06	1.14942e+07	1.75797e+07	2.10158e+07	1.48506e+07	1.24839e+07	8.48664e+06	8.49347e+06	1.94147e+07	1.78662e+07	1.38755e+07	1.20436e+07	1.4256e+07	1.207e+07	1.08831e+07	1.11578e+07	1.3346e+07
pos-3.494_214.09528	214.095	3.494	1-(beta-d-ribofuranosyl)-1,2-dihydropyrimidine	C9H14N2O4									741727	3.55181e+06	2.36003e+06	636705	776894	2.69466e+06	1.44507e+06	187927	2.83248e+06	4.31367e+06	1.17171e+06	1.39793e+06	1.10663e+06	896393	1.85976e+06	1.4093e+06	1.43253e+06	1.58272e+06	1.13947e+06	1.5142e+06	1.1146e+06	1.14255e+06	1.65912e+06
pos-1.61_214.09476	214.095	1.61	1-(beta-d-ribofuranosyl)-1,2-dihydropyrimidine	C9H14N2O4									2.95305e+06	1.7522e+07	1.10763e+07	8.7803e+06	3.11826e+06	2.9885e+06	9.05268e+06	7.93719e+06	1.02269e+07	1.88485e+07	8.56731e+06	7.34485e+06	6.00952e+06	5.69173e+06	1.58348e+07	1.53231e+07	7.96756e+06	9.38078e+06	9.28634e+06	9.74656e+06	8.97129e+06	1.03066e+07	9.56897e+06
pos-3.456_469.2712	469.271	3.456	1-(diisobutylamino)-3-(1,3-dimethyl-2,6-dioxo-2,3,6,7-tetrahydro-1h-purin-8-yl)-2-propanyl benzoate	C25H35N5O4									583894	966063	2.5973e+06	4.69745e+06	3.3295e+06	308254	82072.1	4.85076e+06	293305	3.22319e+06	106733	126572	221658	57596	271580	1.22006e+06	925029	1.32072e+06	1.08556e+06	1.42634e+06	1.10563e+06	832870	735699
pos-5.512_172.12477	172.125	5.512	1,1,6-trimethyl-1,2-dihydronaphthalene	C13H16	HMDB0040284	Benzenoids	Naphthalenes						2.41385e+06	696927	1.10383e+06	1.76355e+06	1.07311e+06	3.02034e+06	363179	1.52748e+06	545913	818790	2.0972e+06	1.39642e+06	1.15866e+06	930086	817693	433382	799141	809740	903422	813919	742796	631682	804478
pos-4.741_172.12472	172.125	4.741	1,1,6-trimethyl-1,2-dihydronaphthalene	C13H16	HMDB0040284	Benzenoids	Naphthalenes						2.46263e+07	2.78002e+07	6.02477e+06	1.08361e+07	6.6335e+06	1.62471e+07	2.5616e+07	1.87313e+07	1.54403e+07	1.66871e+07	6.83325e+06	1.59432e+07	2.00157e+07	2.43287e+07	9.40875e+06	3.78642e+07	2.1716e+07	1.48871e+07	2.08322e+07	2.13426e+07	2.2272e+07	2.06454e+07	1.88394e+07
pos-4.631_172.12465	172.125	4.631	1,1,6-trimethyl-1,2-dihydronaphthalene	C13H16	HMDB0040284	Benzenoids	Naphthalenes						2.43235e+07	2.76776e+07	5.93453e+06	1.07201e+07	2.44289e+06	1.2122e+07	2.56588e+07	1.67886e+07	1.53103e+07	1.65788e+07	6.74677e+06	1.57639e+07	1.9789e+07	2.41321e+07	9.29874e+06	3.76786e+07	2.15798e+07	1.47458e+07	2.06892e+07	2.1194e+07	2.21593e+07	2.03047e+07	1.85385e+07
pos-6.107_172.12472	172.125	6.107	1,1,6-trimethyl-1,2-dihydronaphthalene	C13H16	HMDB0040284	Benzenoids	Naphthalenes						3.19086e+07	2.17074e+07	2.72128e+07	3.36118e+07	1.41773e+07	3.13215e+07	7.65287e+06	2.44726e+07	1.48124e+07	1.79563e+07	1.85201e+07	1.82575e+07	2.59485e+07	2.48259e+07	1.92315e+07	1.36964e+07	1.93553e+07	1.956e+07	1.83006e+07	1.89184e+07	1.7676e+07	1.5469e+07	1.44638e+07
pos-5.768_172.12473	172.125	5.768	1,1,6-trimethyl-1,2-dihydronaphthalene	C13H16	HMDB0040284	Benzenoids	Naphthalenes						3.35916e+06	1.15215e+06	2.55836e+06	1.69245e+06	1.1365e+06	2.26535e+06	266068	694606	781779	598151	1.90703e+06	762857	8.4889e+06	3.19434e+06	1.23093e+06	689114	1.28394e+06	1.16387e+06	1.16457e+06	661405	947599	1.02714e+06	793836
neg-2.001_551.17195	551.172	2.001	haloperidol glucuronide	C27H31ClFNO8	HMDB0060904	Organic oxygen compounds	Organooxygen compounds						8.14988e+07	2.25695e+07	2.53353e+07	1.53664e+07	148653891	7.3938e+07	6.02925e+07	5.28243e+07	4.03216e+07	1.8477e+07	2.72264e+07	3.39178e+07	4.45177e+07	2.25822e+07	2.14838e+07	2.96171e+07	2.45651e+07	2.40478e+07	2.30286e+07	2.50479e+07	2.78305e+07	2.92855e+07	3.14991e+07
pos-3.505_216.08974	216.09	3.505	1,2,3,4-tetrahydro-卯虏-carboline-3-carboxylic acid	C12H12N2O2									962916	551566	424299	218292	341845	2.89094e+06	1.01352e+06	361049	1.37067e+06	1.32769e+06	962363	1.36127e+06	988830	741772	689032	352885	1.03558e+06	1.028e+06	993651	933479	959845	927982	1.05e+06
pos-3.45_606.31243	606.312	3.45	1,25-dihydroxy-20s-21-(3-hydroxy-3-methylbutyl)-23-yne-26,27-hexafluorovitamin d3	C32H44F6O4									366460	7.51852e+06	3.41051e+07	5.89139e+06	383152	314993	791716	886684	8.8536e+06	2.34962e+07	7.36723e+06	5.20746e+06	9.37921e+06	1.85904e+06	1.37443e+06	6.68744e+06	9.1768e+06	1.00409e+07	8.18019e+06	9.42079e+06	9.33526e+06	9.76688e+06	9.90259e+06
pos-4.725_182.10895	182.109	4.725	1,2-dihydrostilbene	C14H14				C14685					8.27538e+06	9.31065e+06	2.14615e+06	6.47071e+06	874438	5.84535e+06	1.22384e+07	6.17401e+06	6.64416e+06	5.63173e+06	3.49369e+06	5.05784e+06	5.99458e+06	8.52096e+06	4.00379e+06	4.47332e+06	7.38134e+06	5.49886e+06	5.9218e+06	5.57248e+06	7.57339e+06	5.33643e+06	6.83346e+06
pos-6.104_182.109	182.109	6.104	1,2-dihydrostilbene	C14H14				C14685					7.82684e+06	7.17843e+06	3.97053e+06	3.37426e+06	4.45517e+06	4.53239e+06	3.25508e+06	6.13839e+06	1.84472e+06	2.0269e+06	2.81797e+06	2.39071e+06	6.70333e+06	3.95498e+06	1.76123e+06	3.91986e+06	2.42014e+06	2.64138e+06	2.30596e+06	2.38467e+06	2.13117e+06	2.1221e+06	1.40994e+06
neg-5.579_680.44593	680.446	5.579	1,2-di-o-myristoyl-sn-glycero-3-phosphosulfocholine	C35H69O8PS									174010	2.44397e+06	1.19157e+07	2.67718e+07	355319	4.40527e+06	44256.5	2.31718e+06	3.38041e+06	3.96804e+06	6.41161e+06	5.32776e+06	322182	1.19121e+06	569315	576907	1.76247e+06	2.01227e+06	1.87149e+06	2.24057e+06	2.23421e+06	2.038e+06	2.38151e+06
neg-5.643_680.44593	680.446	5.643	1,2-di-o-myristoyl-sn-glycero-3-phosphosulfocholine	C35H69O8PS									91630.9	980638	6.12874e+06	1.29777e+07	83226.8	1.77851e+06	48877.4	1.37911e+06	1.89095e+06	3.37409e+06	4.9738e+06	3.0066e+06	193307	670974	479048	460813	1.196e+06	1.54605e+06	1.47179e+06	1.30437e+06	1.41299e+06	1.27948e+06	1.05335e+06
pos-3.262_303.16157	303.162	3.262	1,2-diphenyl-1-(2-pyridinyl)-2-butanol	C21H21NO									1.65918e+06	5.58329e+06	4.55612e+06	4.68071e+06	2.80632e+06	1.43647e+06	4.25225e+06	2.03138e+06	3.58642e+06	7.05392e+06	3.54712e+06	976095	2.59827e+06	1.26405e+06	4.06075e+06	4.26761e+06	2.77982e+06	3.51594e+06	3.04129e+06	2.62473e+06	3.96262e+06	3.51947e+06	3.81081e+06
pos-3.508_884.48661	884.487	3.508	1,3-(8r,9r-epoxy-octadec-13z,15z-dien-4,6-diynoyl)-2-(8-hydroxy-13e,17e-octadecadien-9,11-diynoyl)-sn-glycerol	C56H68O9									689419	2.79576e+06	2.26937e+06	1.78432e+06	1.25755e+06	1.39847e+06	2.72798e+06	2.36481e+06	2.55996e+06	3.50281e+06	2.39352e+06	1.37803e+06	1.30373e+06	1.44789e+06	2.86187e+06	3.51726e+06	2.24465e+06	2.34792e+06	2.23807e+06	2.05399e+06	1.90123e+06	2.04011e+06	2.06657e+06
pos-6.224_94.07799	94.078	6.224	1,3,5-heptatriene	C7H10									3.80719e+06	6.87054e+06	1.00031e+07	1.41063e+07	6.8776e+06	1.07282e+07	1.10124e+06	1.1811e+07	6.22359e+06	5.61035e+06	8.02758e+06	7.09421e+06	5.11584e+06	6.8024e+06	4.24604e+06	3.31685e+06	6.30405e+06	5.96685e+06	6.15171e+06	5.58763e+06	6.61428e+06	5.15228e+06	4.23085e+06
pos-4.062_162.12507	162.125	4.062	1,3,7-octanetriol	C8H18O3									1.0171e+07	1.64837e+06	2.19035e+06	3.19989e+06	1.21446e+07	1.09819e+07	5.45097e+06	6.3343e+06	2.36313e+06	1.78555e+06	2.82872e+06	4.20216e+06	6.88296e+06	4.12211e+06	1.83645e+06	2.13923e+06	3.62347e+06	3.26142e+06	3.00338e+06	3.15599e+06	2.67953e+06	2.70273e+06	2.76277e+06
pos-0.883_236.12657	236.127	0.883	1,3-dipropylxanthine	C11H16N4O2									7.33949e+06	9.11896e+06	6.93206e+06	7.70595e+06	8.29886e+06	6.59169e+06	4.19704e+06	3.95672e+06	5.10457e+06	8.5245e+06	5.6799e+06	6.61414e+06	5.06761e+06	4.07778e+06	5.20565e+06	5.90281e+06	2.92906e+06	3.96805e+06	3.5673e+06	4.216e+06	4.87294e+06	4.72705e+06	4.46949e+06
pos-3.377_158.08405	158.084	3.377	1,5-dan	C10H10N2									6.61693e+07	5.98085e+07	5.46409e+07	6.5808e+07	1.78883e+08	1.02418e+08	9.98831e+07	147684582	6.36159e+07	5.97606e+07	6.78384e+07	6.47565e+07	8.19537e+07	5.5035e+07	9.85223e+07	8.15059e+07	6.01028e+07	5.89789e+07	6.17693e+07	5.89873e+07	5.87065e+07	6.52881e+07	6.57442e+07
pos-4.685_170.10896	170.109	4.685	1,6,7-trimethylnaphthalene	C13H14	HMDB0059701	Benzenoids	Naphthalenes						4.03876e+06	2.65273e+07	6.69817e+06	9.44349e+06	628310	6.51263e+06	3.9022e+07	1.97932e+07	2.20706e+07	1.2767e+07	6.17598e+06	1.27611e+07	1.99277e+07	1.76864e+07	1.13006e+07	2.65871e+07	1.38776e+07	1.57074e+07	1.58794e+07	1.56999e+07	1.58587e+07	9.71146e+06	1.52644e+07
pos-4.753_170.1089	170.109	4.753	1,6,7-trimethylnaphthalene	C13H14	HMDB0059701	Benzenoids	Naphthalenes						2.69193e+07	589447	4.96663e+06	9.64625e+06	1.05445e+06	6.40598e+06	2.65591e+06	1.97932e+07	2.20706e+07	1.2767e+07	6.14617e+06	1.27611e+07	1.99277e+07	1.76864e+07	1.13006e+07	1.88289e+06	1.38776e+07	1.57074e+07	1.48762e+07	1.56999e+07	1.58587e+07	9.71146e+06	1.52644e+07
pos-6.104_170.109	170.109	6.104	1,6,7-trimethylnaphthalene	C13H14	HMDB0059701	Benzenoids	Naphthalenes						6.3118e+06	4.23326e+06	6.36066e+06	7.7439e+06	2.63487e+06	8.28656e+06	1.31406e+06	4.26627e+06	3.70537e+06	3.72839e+06	4.3911e+06	4.71638e+06	6.08511e+06	5.81612e+06	3.99747e+06	2.9205e+06	4.28269e+06	4.68354e+06	4.69296e+06	4.21079e+06	4.68822e+06	3.08459e+06	2.91307e+06
pos-5.572_170.10902	170.109	5.572	1,6,7-trimethylnaphthalene	C13H14	HMDB0059701	Benzenoids	Naphthalenes						2.76666e+06	1.70722e+06	7.23424e+06	8.73443e+06	1.89435e+06	5.66545e+06	1.80227e+06	2.03342e+06	4.7252e+06	2.12742e+06	9.85831e+06	3.57478e+06	1.31115e+06	1.67229e+06	981409	837934	2.56031e+06	2.43659e+06	3.06927e+06	2.55011e+06	2.03728e+06	1.81818e+06	2.56335e+06
neg-5.422_1018.60187	1018.6	5.422	1,7-bis[2-(bicyclo[2.2.1]hept-5-en-2-yl)ethyl]-3,5-bis({[2-(bicyclo[2.2.1]hept-5-en-2-yl)ethyl](dimethyl)silyl}oxy)-3,5-dicyclohexyl-1,1,7,7-tetramethyltetrasiloxane	C44H90N8O14S2									459803	994531	582763	360709	480741	150449	124249	240070	241098	228878	308697	238948	1.05555e+06	2.02461e+06	1.82147e+06	4.43385e+06	1.30399e+06	1.02153e+06	1.36979e+06	1.34722e+06	1.45033e+06	1.41907e+06	1.19179e+06
pos-4.524_452.33501	452.335	4.524	1,8,15,22-tetraazacyclooctacosane-2,9,16,23-tetrone	C23H48O8									123799	34045.5	38598.6	57594.8	80858.2	121939	78325.4	83106.1	39534.1	33371.3	46041.9	56313.9	492039	581639	572399	1.06774e+06	250792	210601	202287	211549	191118	151249	219234
neg-0.907_142.02622	142.026	0.907	1_2_3_5-tetrahydroxybenzene	C6H6O4									6.22005e+07	1.469e+07	3.80637e+07	7.12693e+07	4.98581e+07	4.43873e+07	3.80468e+07	3.56098e+07	5.08755e+07	2.4211e+07	6.65166e+07	5.07024e+07	2.91134e+07	3.46534e+07	1.03956e+07	2.26684e+07	3.39477e+07	3.69863e+07	3.21265e+07	3.27363e+07	3.13151e+07	3.2489e+07	3.35914e+07
neg-1.53_142.02633	142.026	1.53	1_2_3_5-tetrahydroxybenzene	C6H6O4									2.26792e+06	705262	2.19381e+06	3.08988e+06	1.11284e+06	2.06309e+06	517912	937428	2.3284e+06	1.87096e+06	3.03808e+06	2.11403e+06	1.25278e+06	869869	682928	1.14073e+06	1.18184e+06	1.19095e+06	1.14033e+06	1.30037e+06	1.53361e+06	1.51088e+06	1.68943e+06
pos-5.51_120.09356	120.094	5.51	1_2_4-trimethylbenzene	C9H12									2.2754e+06	644119	2.50152e+06	2.47263e+06	1.62346e+06	3.17701e+06	179987	1.63765e+06	677631	928336	2.88851e+06	1.76928e+06	1.34974e+06	1.3407e+06	868819	438009	1.08216e+06	1.235e+06	951752	882698	1.01741e+06	990353	692166
pos-5.588_120.09359	120.094	5.588	1_2_4-trimethylbenzene	C9H12									4.25866e+06	1.85796e+06	6.26095e+06	1.1652e+07	4.1012e+06	7.05806e+06	2.80336e+06	2.63364e+06	2.70208e+06	2.16399e+06	4.72962e+06	3.43098e+06	1.87109e+06	2.61927e+06	1.4131e+06	1.11758e+06	2.44609e+06	2.46309e+06	2.03001e+06	2.80415e+06	1.85818e+06	1.91938e+06	1.80416e+06
pos-6.577_120.09358	120.094	6.577	1_2_4-trimethylbenzene	C9H12									2.19748e+06	1.35521e+06	4.95609e+06	8.40692e+06	2.10008e+06	5.52031e+06	556676	2.32825e+06	1.64825e+06	1.97192e+06	3.46722e+06	2.25954e+06	1.78248e+06	1.32328e+06	1.095e+06	965410	2.28297e+06	2.19639e+06	1.8932e+06	1.80494e+06	2.1574e+06	1.35872e+06	1.55529e+06
pos-6.102_120.09356	120.094	6.102	1_2_4-trimethylbenzene	C9H12									2.77151e+06	2.16932e+06	3.67958e+06	3.78112e+06	1.50287e+06	2.51973e+06	988250	2.3675e+06	1.48513e+06	1.9038e+06	1.87197e+06	1.86428e+06	2.43293e+06	3.33081e+06	1.8522e+06	1.47217e+06	1.97715e+06	1.91196e+06	1.86862e+06	1.67222e+06	2.03342e+06	1.4864e+06	1.45349e+06
pos-0.814_108.02084	108.021	0.814	1_2-benzoquinone	C6H4O2									2.98711e+07	1.24613e+07	1.13391e+06	1.99626e+06	1.01603e+07	2.36114e+07	2.81888e+06	5.53367e+06	7.37662e+06	5.69304e+06	8.62723e+06	1.53211e+07	1.89402e+07	1.23269e+07	1.18706e+07	9.09911e+06	5.15243e+06	7.70708e+06	8.15437e+06	5.45454e+06	8.3889e+06	7.70169e+06	5.20302e+06
pos-5.873_248.1404	248.14	5.873	1_2-dihydrosantonin	C15H20O3									709346	252999	206664	394430	955029	700337	508618	521565	481337	251208	659226	313412	1.05563e+06	895327	1.01335e+06	481186	360420	374285	516972	373758	292977	416206	515129
pos-4.908_248.14042	248.14	4.908	1_2-dihydrosantonin	C15H20O3									3.00391e+06	720806	1.54493e+06	2.77887e+06	337100	3.30856e+06	1.04249e+06	403970	292457	252459	2.08134e+06	2.45914e+06	2.31298e+07	1.13297e+06	1.1986e+06	7.50381e+06	3.51762e+06	3.1919e+06	2.89875e+06	3.24993e+06	2.99257e+06	2.19087e+06	1.95294e+06
pos-4.737_248.14034	248.14	4.737	1_2-dihydrosantonin	C15H20O3									724971	267646	1.54493e+06	2.77887e+06	341882	490858	386936	524881	152530	112524	2.08134e+06	2.45914e+06	2.31298e+07	4.68885e+06	403957	7.50381e+06	3.51762e+06	3.1919e+06	2.89875e+06	3.24993e+06	2.99257e+06	2.19087e+06	1.95294e+06
pos-6.328_168.07823	168.078	6.328	1_3_5-trimethoxybenzene	C9H12O3									3.19887e+06	2.03601e+06	4.33115e+06	6.07576e+06	2.34986e+06	4.69422e+06	2.4614e+06	4.02412e+06	2.02975e+06	2.62018e+06	2.43248e+06	2.75202e+06	3.06177e+06	2.82341e+06	3.88662e+06	2.49911e+06	3.32325e+06	3.01129e+06	3.0457e+06	3.08728e+06	2.29723e+06	2.03517e+06	1.99968e+06
pos-3.794_192.04185	192.042	3.794	1_3_6_8-naphthalenetetrol	C10H8O4									4.05862e+06	927573	1.05407e+06	1.18633e+06	2.45776e+06	3.2057e+06	1.99994e+06	2.10499e+06	930688	1.38464e+06	1.00058e+06	1.58118e+06	1.87918e+06	1.63621e+06	1.94361e+06	775582	1.6129e+06	981642	1.06883e+06	1.51583e+06	1.2646e+06	1.51768e+06	1.32725e+06
pos-4.982_176.04683	176.047	4.982	1_3_8-naphthalenertriol	C10H8O3									2.7472e+06	821960	863320	1.12672e+06	4.1804e+06	5.31838e+06	1.47885e+06	1.76908e+06	787332	878023	847544	1.14919e+06	1.25953e+06	1.12803e+06	828879	931599	1.05365e+06	1.40016e+06	949453	992064	1.02378e+06	1.02424e+06	1.23736e+06
pos-0.869_666.22042	666.22	0.869	1_3-alpha-d-mannosyl-1_2-alpha-d-mannosyl-1_2-alpha-d-mannosyl-d-mannose	C24H42O21									1.38053e+07	6.51632e+06	6.20166e+06	9.61218e+06	3.12838e+07	6.52488e+07	1.16144e+07	1.32296e+07	5.90243e+06	3.9272e+06	4.78671e+06	6.85855e+06	8.56181e+06	7.27352e+06	3.9212e+06	3.79839e+06	5.40856e+06	7.53037e+06	5.59133e+06	5.88477e+06	7.79997e+06	8.75027e+06	5.96213e+06
neg-0.895_666.22168	666.222	0.895	1_3-alpha-d-mannosyl-1_2-alpha-d-mannosyl-1_2-alpha-d-mannosyl-d-mannose	C24H42O21									7.36738e+06	3.31757e+07	3.1915e+07	4.17571e+07	1.24019e+08	1.45048e+08	1.86539e+07	4.87483e+07	2.94914e+07	3.5639e+07	3.61243e+07	3.78763e+07	2.1793e+07	3.57049e+07	2.37941e+07	1.58964e+07	4.22285e+07	3.88857e+07	3.53804e+07	3.43518e+07	3.85724e+07	3.63356e+07	3.70682e+07
neg-1.365_666.22177	666.222	1.365	1_3-alpha-d-mannosyl-1_2-alpha-d-mannosyl-1_2-alpha-d-mannosyl-d-mannose	C24H42O21									1.53722e+06	1.2897e+07	1.46068e+07	2.01977e+07	2.21412e+07	3.19429e+07	2.59258e+06	1.22715e+07	1.01413e+07	1.2981e+07	1.30116e+07	1.44596e+07	6.14854e+06	1.10589e+07	1.10404e+07	5.08866e+06	1.01164e+07	1.01558e+07	1.00751e+07	1.14556e+07	1.13287e+07	1.16095e+07	1.04301e+07
pos-0.673_88.09992	88.0999	0.673	1_4-diaminobutane;putrescine	C4H12N2									4.10317e+07	6.2891e+06	8.12037e+06	1.01464e+07	4.5047e+07	2.84645e+07	3.54555e+07	2.10635e+07	4.11815e+06	2.85354e+06	4.18867e+06	4.48476e+06	6.0095e+06	6.77146e+06	3.97442e+06	5.76764e+06	7.04791e+06	7.0015e+06	7.53736e+06	6.08899e+06	7.62974e+06	6.95942e+06	8.44684e+06
pos-1.526_86.03655	86.0366	1.526	1_4-lactone	C4H6O2									1.33592e+07	983707	2.43726e+06	1.76861e+06	2.43464e+07	4.65122e+07	7.54062e+06	7.41347e+06	1.00819e+06	1.10551e+06	3.07297e+06	4.35378e+06	5.41365e+06	5.4009e+06	2.00307e+06	1.44995e+06	3.26942e+06	2.76698e+06	2.83603e+06	3.09212e+06	3.02955e+06	2.61654e+06	2.01603e+06
neg-1.365_86.03651	86.0365	1.365	1_4-lactone	C4H6O2									1.07777e+06	1.7495e+06	1.52446e+06	4.25181e+06	4.62259e+06	2.10406e+06	1.47527e+06	5.29916e+06	983712	613839	770531	937483	1.20163e+06	763491	450321	1.30832e+06	1.04581e+06	1.1277e+06	934022	1.02822e+06	1.09209e+06	1.08635e+06	1.20717e+06
neg-0.917_86.03654	86.0365	0.917	1_4-lactone	C4H6O2									4.60186e+06	7.0791e+06	3.9784e+06	3.87093e+06	7.14086e+06	4.05285e+06	3.94489e+06	5.98638e+06	3.61542e+06	2.59836e+06	4.58887e+06	5.49737e+06	6.74508e+06	1.98409e+06	1.26743e+06	2.94752e+06	2.80737e+06	2.51476e+06	2.12865e+06	3.33365e+06	2.48769e+06	2.1313e+06	3.10246e+06
neg-4.608_184.10945	184.109	4.608	1_6_6-trimethyl-2_7-dioxabicyclo[3.2.2]nonan-3-one	C10H16O3									1.19008e+06	616982	1.05053e+06	2.32449e+06	569228	1.25021e+06	1.0101e+06	488645	951513	644854	1.00364e+06	924209	1.26454e+06	944684	923906	2.40043e+06	891521	782656	734878	581467	837259	686901	873403
pos-3.233_226.16813	226.168	3.233	1_8-diazacyclotetradecane-2_9-dione	C12H22N2O2									639234	4.81784e+06	5.32415e+06	1.61923e+06	824783	692448	1.71843e+07	3.30559e+06	8.97285e+06	1.09064e+07	7.24156e+06	1.63258e+06	1.97468e+06	1.62818e+06	4.62797e+06	6.06347e+06	5.04713e+06	4.08424e+06	4.81608e+06	6.41882e+06	6.71129e+06	3.61784e+06	5.67797e+06
pos-1.963_551.17151	551.172	1.963	haloperidol glucuronide	C27H31ClFNO8	HMDB0060904	Organic oxygen compounds	Organooxygen compounds						6.40007e+07	8.12839e+06	8.95232e+06	6.19359e+06	5.89671e+07	3.22072e+07	3.01514e+07	1.43876e+07	1.16719e+07	6.93559e+06	1.2768e+07	1.46565e+07	2.23825e+07	8.36072e+06	8.16364e+06	1.04693e+07	8.94306e+06	9.71355e+06	1.03704e+07	1.07044e+07	1.2944e+07	1.39034e+07	1.29209e+07
pos-3.907_389.23376	389.234	3.907	1-{4-[2-(diethylamino)ethoxy]phenyl}-1,2-diphenylethanol	C19H36NO5P									180254	510997	459214	491949	249034	168061	126869	113502	768741	937826	533927	534925	478812	316482	505415	715366	329837	363019	427176	441779	484886	571912	555001
neg-3.877_386.23019	386.23	3.877	10,11-dihydro-20-trihydroxy-leukotriene b4	C20H34O7	HMDB0012503	Lipids and lipid-like molecules	Fatty Acyls						7.10549e+06	2.51439e+06	7.53922e+06	1.6629e+07	1.06074e+07	1.77791e+07	6.25536e+06	1.1416e+07	2.75082e+06	857615	7.60784e+06	6.5999e+06	4.06845e+06	6.28561e+06	2.66079e+06	4.11054e+06	3.40006e+06	4.40933e+06	4.96288e+06	4.35688e+06	3.67807e+06	3.09106e+06	4.40121e+06
neg-4.993_386.2301	386.23	4.993	10,11-dihydro-20-trihydroxy-leukotriene b4	C20H34O7	HMDB0012503	Lipids and lipid-like molecules	Fatty Acyls						1.54307e+08	2.97514e+07	2.33254e+06	1.93704e+07	4.04302e+06	1.55287e+06	9.3216e+06	4.07208e+06	5.01531e+07	4.52203e+07	9.05116e+07	4.64686e+07	4.52028e+07	4.94025e+07	6.50588e+07	3.69446e+07	8.97758e+07	8.86877e+07	8.88404e+07	8.12649e+07	7.346e+07	7.22489e+07	7.12647e+07
neg-6.23_288.22981	288.23	6.23	10_16-dihydroxyhexadecanoicacid	C16H32O4									712892	200537	451053	258384	176830	191056	209279	237056	310674	134240	259033	180595	3.91416e+06	5.46136e+06	4.92976e+06	4.62133e+06	1.9364e+06	2.14665e+06	2.40663e+06	1.87323e+06	2.19703e+06	2.41005e+06	1.92561e+06
neg-5.013_288.22948	288.229	5.013	10_16-dihydroxyhexadecanoicacid	C16H32O4									857251	748828	915508	1.95215e+06	283475	670730	213627	460499	435160	207187	325959	307515	669324	390088	452892	440055	445555	511207	444337	524141	554899	515668	416185
pos-6.104_216.11429	216.114	6.104	10e,12e-tetradecadiene-4,6-diynoic acid	C14H16O2									2.65898e+06	1.46352e+06	2.1395e+06	4.44305e+06	1.88077e+06	4.30353e+06	477316	1.98587e+06	1.68594e+06	1.47805e+06	1.95701e+06	2.1517e+06	2.27294e+06	3.01045e+06	1.86593e+06	1.37806e+06	1.76768e+06	1.7912e+06	2.3853e+06	1.47372e+06	1.8524e+06	1.56022e+06	1.88589e+06
pos-4.928_216.11434	216.114	4.928	10e,12e-tetradecadiene-4,6-diynoic acid	C14H16O2									2.62522e+06	865367	486391	879949	417986	1.19871e+06	620579	1.67823e+06	724860	385449	521002	436135	433485	1.58328e+06	255270	604624	671999	580714	533674	561394	598817	550449	483824
pos-5.571_216.11434	216.114	5.571	10e,12e-tetradecadiene-4,6-diynoic acid	C14H16O2									4.69709e+06	3.46193e+06	9.04618e+06	1.60088e+07	4.66715e+06	1.43105e+07	2.37966e+06	4.40406e+06	6.55202e+06	5.34222e+06	1.06002e+07	9.08892e+06	2.44699e+06	5.24299e+06	1.96495e+06	2.70659e+06	5.11396e+06	4.94254e+06	5.80311e+06	6.08531e+06	5.63403e+06	4.14171e+06	4.91803e+06
pos-6.58_216.11431	216.114	6.58	10e,12e-tetradecadiene-4,6-diynoic acid	C14H16O2									799351	907843	2.7287e+06	4.7614e+06	1.18791e+06	3.20827e+06	683867	1.76501e+06	1.29151e+06	1.29896e+06	2.3039e+06	1.32769e+06	509786	923978	640396	454333	1.65076e+06	1.12783e+06	1.52437e+06	1.24334e+06	1.14713e+06	1.14755e+06	1.05896e+06
pos-5.253_216.11437	216.114	5.253	10e,12e-tetradecadiene-4,6-diynoic acid	C14H16O2									1.13529e+06	757774	3.12997e+06	4.10659e+06	791202	773688	152324	623373	576180	708947	1.61428e+06	1.0868e+06	1.05257e+06	546850	501557	264103	758480	873192	886946	593747	640081	709118	753167
pos-5.747_312.26551	312.266	5.747	10-oxo-nonadecanoic acid	C19H36O3									3.04745e+07	2.21925e+07	1.65672e+07	1.97406e+07	1.73626e+07	2.30924e+07	9.85813e+06	1.79556e+07	1.50491e+07	1.80322e+07	2.32799e+07	2.39356e+07	1.68599e+07	2.19441e+07	2.27776e+07	1.3502e+07	1.84061e+07	1.55226e+07	1.42621e+07	1.47771e+07	1.32359e+07	1.28428e+07	1.35595e+07
pos-5.592_312.2655	312.265	5.592	10-oxo-nonadecanoic acid	C19H36O3									3.85956e+07	2.69488e+07	1.25983e+07	1.29878e+07	2.16046e+07	2.16814e+07	1.1672e+07	1.25345e+07	1.0007e+07	1.03979e+07	2.3072e+07	2.14094e+07	1.7914e+07	2.03416e+07	1.462e+07	1.4864e+07	1.71417e+07	1.39897e+07	1.34063e+07	1.57223e+07	1.16039e+07	1.13663e+07	1.18844e+07
neg-8.281_312.266	312.266	8.281	10-oxo-nonadecanoic acid	C19H36O3									50309.4	140180	72674.3	119534	72963.8	53260.1	36505.1	56794.3	6.69098e+06	77869.1	25151.3	34348.4	111915	95159.9	26966.6	133415	273181	314816	346122	263956	219762	372206	273246
pos-4.54_273.24489	273.245	4.54	10z,13z,16z-nonadecatrienenitrile	C19H31N									2.38744e+06	211696	258707	399012	727030	1.23589e+06	410660	635153	390935	118495	120302	239601	590569	1.15818e+06	1.33211e+06	552202	928909	685327	612452	687269	556055	566593	463562
neg-8.842_308.27113	308.271	8.842	11(z),14(z)-eicosadienoic acid	C20H36O2									109659	257793	1.33383e+06	108285	122762	131212	64310.1	99295.2	165975	147240	707822	71543	2.71928e+06	2.12777e+06	3.49658e+06	2.6454e+06	1.33116e+06	1.07957e+06	1.24233e+06	1.08637e+06	1.24334e+06	1.31057e+06	1.57329e+06
neg-1.547_545.26259	545.263	1.547	omacetaxine mepesuccinate	C29H39NO9									40588.8	208947	1.22053e+06	601038	76281.9	41472.9	39731.8	105688	104084	915615	104727	116873	33194.6	56531	36534.3	96229.4	212644	146912	172903	132586	225341	229368	181127
neg-8.837_406.20193	406.202	8.837	11,11'-carbonylbis(7,11-diazatricyclo[7.3.1.0~2,7~]trideca-2,4-dien-6-one)	C23H26N4O3									1.57993e+07	1.35065e+07	1.37575e+07	2.2128e+06	4.07371e+06	1.7839e+07	5.27686e+06	6.6923e+06	1.35939e+07	1.85315e+07	6.08834e+06	1.24012e+07	2.08941e+08	1.75788e+08	1.88708e+08	1.87788e+08	5.94263e+07	1.05848e+08	1.18653e+08	1.19592e+08	1.12059e+08	1.26217e+08	8.87256e+07
pos-3.997_364.22396	364.224	3.997	11beta_17alpha_21-trihydroxy-5beta-pregnane-3_20-dione	C21H32O5									1.95625e+06	68983.8	102343	51610.2	121312	393624	4.11365e+06	96776.3	52966.1	133900	186154	85049.3	86952.1	91879.5	240060	64013.7	129825	135047	179331	109395	120922	204291	171960
pos-4.785_348.22899	348.229	4.785	11beta_21-dihydroxy-5beta-pregnane-3_20-dione	C21H32O4									8.31165e+06	1.15637e+06	4.45178e+06	2.90596e+06	636109	3.36467e+06	3.38964e+06	4.17918e+06	1.34655e+06	780433	4.49594e+06	2.49037e+06	1.75635e+06	4.97759e+06	1.96425e+06	1.37395e+06	1.6424e+06	1.87455e+06	1.69414e+06	1.58968e+06	1.95661e+06	1.39055e+06	2.02148e+06
pos-5.174_348.229	348.229	5.174	11beta_21-dihydroxy-5beta-pregnane-3_20-dione	C21H32O4									3.85698e+07	1.43921e+07	1.46496e+07	1.01162e+07	4.23744e+06	3.66641e+07	2.6578e+06	5.94655e+06	9.0683e+06	4.03453e+06	1.53449e+07	1.82356e+07	3.41608e+07	2.62874e+07	1.08863e+07	7.08448e+06	1.32494e+07	1.19656e+07	1.05817e+07	11512323	1.02063e+07	9.52608e+06	9.80268e+06
pos-5.224_348.2291	348.229	5.224	11beta_21-dihydroxy-5beta-pregnane-3_20-dione	C21H32O4									1.10287e+07	3.76037e+06	1.0864e+07	4.68171e+06	4.25102e+06	6.78695e+06	2.18209e+06	2.13403e+06	7.38223e+06	1.94287e+06	8.95259e+06	4.73748e+06	2.45758e+07	8.39582e+06	3.16985e+06	2.90841e+06	4.15588e+06	4.23414e+06	4.57943e+06	4.84787e+06	3.5662e+06	4.53927e+06	4.49822e+06
pos-7.242_284.21314	284.213	7.242	11-cis-retinal	C20H28O	HMDB0001358	Lipids and lipid-like molecules	Prenol lipids	C02110	Metabolism|Metabolism|Organismal Systems	Metabolism of cofactors and vitamins|Global and overview maps|Sensory system	Retinol metabolism|Metabolic pathways|Phototransduction	map00830|map01100|map04744	1.95892e+07	7.97384e+06	5.47549e+07	1.75827e+07	2.40688e+07	2.51237e+07	5.58898e+07	3.50512e+07	1.64461e+07	1.64202e+07	2.87689e+07	1.26905e+07	9.76538e+06	4.43842e+07	3.27316e+07	2.44316e+07	3.09523e+07	3.0115e+07	2.7223e+07	2.72308e+07	2.22682e+07	1.78823e+07	1.93326e+07
pos-7.325_284.21318	284.213	7.325	11-cis-retinal	C20H28O	HMDB0001358	Lipids and lipid-like molecules	Prenol lipids	C02110	Metabolism|Metabolism|Organismal Systems	Metabolism of cofactors and vitamins|Global and overview maps|Sensory system	Retinol metabolism|Metabolic pathways|Phototransduction	map00830|map01100|map04744	2.68528e+07	3.01989e+07	8.33903e+07	9.35227e+07	2.54814e+07	8.49701e+07	8.63376e+06	7.93939e+07	3.9583e+07	3.63109e+07	8.38682e+07	3.26009e+07	2.58235e+07	3.59785e+07	3.08784e+07	2.94495e+07	5.06406e+07	5.25364e+07	4.91215e+07	4.38629e+07	4.2207e+07	3.41456e+07	3.13153e+07
pos-7.769_286.22884	286.229	7.769	11-cis-retinol	C20H30O	HMDB0000305	Lipids and lipid-like molecules	Prenol lipids	C00899	Metabolism	Metabolism of cofactors and vitamins	Retinol metabolism	map00830	5.50936e+06	4.19307e+06	1.43195e+07	1.46858e+07	1.00899e+07	4.9605e+06	9.05399e+06	3.96372e+06	3.26108e+06	7.97479e+06	7.32463e+06	4.53521e+06	2.44493e+06	5.16049e+06	7.64303e+06	4.45813e+06	9.91864e+06	9.84918e+06	6.92485e+06	7.42745e+06	6.52384e+06	5.15565e+06	5.30592e+06
neg-4.19_368.2195	368.219	4.19	11-dehydro thromboxane b2	C20H32O6									1.16596e+07	1.49688e+07	1.29911e+07	4.22491e+07	2.19714e+07	2.71563e+07	3.07187e+07	6.88183e+06	2.25371e+07	1.368e+07	1.26922e+07	2.67799e+07	3.20217e+07	1.71245e+07	1.42245e+07	3.11511e+07	1.86279e+07	1.21137e+07	1.23569e+07	1.29059e+07	1.22841e+07	1.29162e+07	1.29875e+07
neg-5.583_364.26091	364.261	5.583	11-deoxy-16,16-dimethyl-pge2	C22H36O4									369390	267890	332081	432136	539513	579755	3.07734e+06	211256	226239	258830	338536	231577	287126	719684	345480	235051	228169	328046	279406	233740	231970	370021	287422
neg-5.437_364.26104	364.261	5.437	11-deoxy-16,16-dimethyl-pge2	C22H36O4									386766	553345	429212	431970	242694	619910	1.45468e+06	154322	200371	208711	680165	303679	1.94279e+06	754155	1.33787e+06	1.29504e+06	571451	428100	476363	395546	368522	585219	514197
neg-5.215_364.26108	364.261	5.215	11-deoxy-16,16-dimethyl-pge2	C22H36O4									5.48423e+06	1.73821e+06	2.58335e+06	3.68449e+06	2.62121e+06	3.60363e+06	1.9223e+06	7.11668e+06	3.66315e+06	1.03086e+06	2.34314e+06	1.58633e+06	689115	5.76659e+06	401974	1.592e+06	1.288e+06	1.46767e+06	1.60907e+06	1.68872e+06	1.61288e+06	1.67776e+06	1.57407e+06
neg-5.515_364.26106	364.261	5.515	11-deoxy-16,16-dimethyl-pge2	C22H36O4									389886	524360	658271	779220	248029	825856	934123	376581	214675	210388	300406	550293	1.12518e+06	1.82424e+06	896420	1.49654e+06	499521	457006	364464	456248	447790	439099	447131
pos-4.877_364.26039	364.26	4.877	11-deoxy-16,16-dimethyl-pge2	C22H36O4									1.70312e+06	821628	1.43903e+06	2.28279e+06	599930	1.73621e+06	937677	2.26045e+06	685529	398183	1.06448e+06	821123	322109	840307	109733	351746	719737	731487	827850	600100	531522	648319	676083
neg-5.96_364.26106	364.261	5.96	11-deoxy-16,16-dimethyl-pge2	C22H36O4									1.53607e+07	1.04998e+07	2.1239e+07	3.35438e+07	7.54939e+06	2.17684e+07	9.95615e+06	3.09051e+07	1.34171e+07	6.62894e+06	1.71994e+07	1.26566e+07	4.71813e+06	1.15815e+07	4.04264e+06	6.11817e+06	9.07613e+06	7.06775e+06	8.21828e+06	8.97623e+06	8.62395e+06	8.53853e+06	8.10724e+06
pos-5.712_364.26029	364.26	5.712	11-deoxy-16,16-dimethyl-pge2	C22H36O4									2.5824e+06	1.0418e+06	2.12539e+06	3.74439e+06	691923	3.33608e+06	2.65688e+06	600554	1.01837e+06	2.43845e+06	3.13013e+06	2.30448e+06	593135	1.30157e+06	1.19591e+06	238667	1.62347e+06	975047	932262	1.00132e+06	1.18195e+06	1.353e+06	1.33258e+06
pos-5.973_364.26028	364.26	5.973	11-deoxy-16,16-dimethyl-pge2	C22H36O4									6.20351e+06	2.41196e+06	5.38167e+06	9.99712e+06	900313	1.14704e+07	4.29958e+06	1.56078e+06	2.45094e+06	5.34163e+06	4.96661e+06	4.41083e+06	1.18139e+06	2.48722e+06	3.157e+06	660902	3.09957e+06	3.14928e+06	3.80781e+06	3.31306e+06	3.83015e+06	2.87286e+06	3.02211e+06
pos-6.105_364.2602	364.26	6.105	11-deoxy-16,16-dimethyl-pge2	C22H36O4									1.29835e+07	7.40944e+06	8.9418e+06	1.77012e+07	4.62963e+06	1.18527e+07	3.92365e+06	9.58931e+06	7.04368e+06	5.87116e+06	7.19467e+06	8.36673e+06	8.40807e+06	1.05142e+07	4.08821e+06	4.57664e+06	8.07792e+06	8.51252e+06	9.17612e+06	6.82937e+06	7.86584e+06	7.3412e+06	6.63127e+06
neg-6.088_364.26104	364.261	6.088	11-deoxy-16,16-dimethyl-pge2	C22H36O4									12391652	1.02794e+07	2.18018e+07	3.33231e+07	5.88183e+06	1.5928e+07	7.58895e+06	2.03984e+07	1.1284e+07	5.69578e+06	1.35993e+07	1.08992e+07	5.14575e+06	8.82857e+06	4.30945e+06	5.26351e+06	7.72742e+06	4.85628e+06	7.8347e+06	8.44654e+06	7.60686e+06	8.15839e+06	8.15791e+06
pos-5.254_364.26021	364.26	5.254	11-deoxy-16,16-dimethyl-pge2	C22H36O4									4.40712e+06	1.2297e+06	5.69288e+06	8.5741e+06	982894	4.21517e+06	1.72199e+06	1.95501e+06	1.52368e+06	3.39544e+06	4.2068e+06	3.11744e+06	894447	1.48598e+06	793464	507481	2.3852e+06	2.38429e+06	2.79069e+06	2.12047e+06	1.96297e+06	1.78032e+06	1.71685e+06
pos-4.351_212.21335	212.213	4.351	11e-tetradecen-1-ol	C14H28O									190116	77825	64243.6	81111.4	214652	162268	129977	115410	55557.1	57121.3	1.7055e+06	95612.1	174029	169974	169008	389566	159887	95454.2	139202	152623	120509	123291	86857.4
pos-4.603_228.17183	228.172	4.603	11-hydroxy-9-tridecenoic acid	C13H24O3	HMDB0035881	Lipids and lipid-like molecules	Fatty Acyls						3.02857e+07	4.38272e+06	4.00828e+06	6.10007e+06	3.25873e+07	2.47199e+07	2.07761e+07	9.28726e+06	6.56213e+06	4.88423e+06	6.99186e+06	7.46776e+06	1.06721e+07	7.29016e+06	4.87234e+06	3.63102e+06	1.44148e+07	1.38161e+07	1.45516e+07	1.45217e+07	1.37557e+07	1.37668e+07	1.31854e+07
pos-4.179_210.16129	210.161	4.179	11-methyl-2z,5z-dodecadienoic acid	C13H22O2									4.16155e+06	627704	526428	971451	4.6317e+06	3.08545e+06	3.51648e+06	2.17819e+06	985212	1.02134e+06	1.71411e+06	1.37949e+06	2.42609e+06	1.0387e+06	1.32256e+06	524234	2.14269e+06	1.87779e+06	2.12683e+06	2.32614e+06	1.81426e+06	2.0978e+06	1.68807e+06
pos-4.603_210.16128	210.161	4.603	11-methyl-2z,5z-dodecadienoic acid	C13H22O2									1001482022	1.60761e+08	148685693	2.3105e+08	1162339843	9.05319e+08	7.37703e+08	3.54288e+08	2.34054e+08	1.81308e+08	2.61281e+08	2.76722e+08	3.74157e+08	2.58227e+08	1.87153e+08	140355570	5.07043e+08	493167514	5.18856e+08	5.14085e+08	5.0035e+08	4.92746e+08	4.80189e+08
pos-1.589_545.26199	545.262	1.589	omacetaxine mepesuccinate	C29H39NO9									1.41511e+06	6.61303e+06	2.64036e+07	2.25534e+07	2.03153e+06	1.07608e+06	1.13626e+06	1.93245e+06	3.39244e+06	1.6716e+07	4.7605e+06	3.87321e+06	887333	3.68349e+06	1.66723e+06	2.29757e+06	5.67596e+06	8.12237e+06	7.16573e+06	6.52947e+06	7.45435e+06	6.14025e+06	4.88516e+06
pos-4.208_199.15659	199.157	4.208	11-nitro-1-undecene	C11H21NO2	HMDB0062669	Organic 1,3-dipolar compounds	Allyl-type 1,3-dipolar organic compounds						2.28406e+07	2.06465e+06	2.05587e+06	2.93703e+06	2.88531e+07	1.33995e+07	1.17155e+07	5.19565e+06	4.32486e+06	3.26163e+06	5.25176e+06	6.25568e+06	6.76411e+06	4.89417e+06	4.29264e+06	1.33953e+06	1.14706e+07	1.10567e+07	1.1044e+07	1.06403e+07	1.00818e+07	9.76646e+06	9.06528e+06
pos-4.431_199.15665	199.157	4.431	11-nitro-1-undecene	C11H21NO2	HMDB0062669	Organic 1,3-dipolar compounds	Allyl-type 1,3-dipolar organic compounds						966601	471034	1.58432e+06	3.37183e+06	1.67405e+06	1.81216e+06	1.21901e+06	859106	1.37218e+06	146685	656528	1.15291e+06	532582	2.63609e+06	273463	798162	662061	609876	631334	554211	742538	720375	701835
neg-4.469_480.23575	480.236	4.469	11-oxo-androsteroneglucuronide	C25H36O9									854755	539394	241791	307240	758761	469097	242307	286357	183961	132643	118594	316437	658211	590575	1.06121e+06	1.68965e+06	351509	336073	381531	377896	386842	361154	362639
pos-4.415_196.10931	196.109	4.415	11-oxo-undeca-5,8-dienoic acid	C11H16O3									2.08716e+06	2.73368e+06	3.18574e+06	1.59394e+06	2.89421e+06	1.52096e+07	3.64446e+06	4.7557e+06	527448	518212	1.14103e+06	535420	948031	821933	573597	324022	865369	933045	966482	1.04529e+06	731503	855437	807886
pos-6.224_260.17713	260.177	6.224	11-phenyl-7e-undecenoic acid	C17H24O2									1.65865e+06	2.09825e+06	5.09156e+06	6.38497e+06	2.19292e+06	3.38991e+06	571917	5.566e+06	1.91569e+06	2.9145e+06	3.08276e+06	2.80113e+06	1.97812e+06	1.68688e+06	1.28157e+06	1.11698e+06	2.80877e+06	3.43365e+06	2.48994e+06	2.26344e+06	2.28445e+06	1.75683e+06	1.80258e+06
pos-6.107_260.17667	260.177	6.107	11-phenyl-7e-undecenoic acid	C17H24O2									3.27186e+06	2.3846e+06	3.56376e+06	4.98474e+06	1.29411e+06	3.54691e+06	578804	4.6208e+06	1.8061e+06	2.10452e+06	2.44211e+06	2.22653e+06	3.62052e+06	3.61035e+06	2.62221e+06	1.546e+06	3.10699e+06	2.50705e+06	3.05084e+06	2.83422e+06	2.86184e+06	1.99399e+06	1.90304e+06
pos-4.482_260.17687	260.177	4.482	11-phenyl-7e-undecenoic acid	C17H24O2									301863	296070	665257	1.67251e+06	426166	480049	133745	212498	184255	113972	397162	319133	401771	186829	364209	198963	212279	349386	382382	343523	237381	368127	256902
neg-5.211_260.17728	260.177	5.211	11-phenyl-7e-undecenoic acid	C17H24O2									840096	579037	800600	1.74151e+06	138328	777163	158114	144174	593325	534088	965359	806640	1.14654e+06	1.12213e+06	654593	507716	705380	592950	693230	604346	585529	539594	675931
neg-4.506_352.22447	352.224	4.506	11尾-prostaglandin e2	C20H32O5									127630656	1.47532e+08	2.72351e+08	3.33682e+08	4.46173e+07	2.00022e+08	4.66711e+07	4.72313e+07	1.21064e+08	102996570	1.8136e+08	1.88277e+08	1.96722e+08	2.09167e+08	1.3049e+08	1.19791e+08	1.55845e+08	1.5429e+08	1.49722e+08	1.58573e+08	1.48552e+08	1.5182e+08	147374625
pos-4.557_376.22139	376.221	4.557	11尾-prostaglandin f2伪	C20H34O5	HMDB0010199	Lipids and lipid-like molecules	Fatty Acyls	C05959	Metabolism	Lipid metabolism	Arachidonic acid metabolism	map00590	5.87285e+07	8.4462e+06	8.12185e+07	1.64116e+07	3.14549e+07	1.19533e+08	1.95e+08	1.79482e+08	3.24062e+07	3.10191e+07	6.46217e+07	3.51679e+07	6.11899e+06	5.23698e+07	1.14903e+07	2.18084e+07	2.86496e+07	2.24724e+07	3.27637e+07	3.25421e+07	4.14847e+07	2.63428e+07	2.45188e+07
pos-7.734_344.25691	344.257	7.734	12,13-dihydroxy-11-methoxy-9-octadecenoic acid	C19H36O5									8.08985e+07	6.91436e+07	6.23523e+07	2.26418e+07	1.57312e+08	1.90839e+07	1.11146e+08	1.0407e+08	2.30392e+07	1.10774e+07	2.55832e+07	4.36564e+07	5.64469e+07	8.07772e+07	1.17106e+08	7.38421e+07	9.61697e+07	8.86944e+07	7.67225e+07	6.41601e+07	6.28432e+07	4.4406e+07	5.47411e+07
neg-4.269_394.10502	394.105	4.269	12a-hydroxyisomillettone	C22H18O7									606621	2.16438e+06	774022	1.4673e+06	1.1312e+06	3.1921e+06	2.37846e+07	6.24479e+06	440236	339046	254088	212336	2.06859e+06	2.33524e+06	3.11607e+06	1.71957e+06	1.60087e+06	1.82617e+06	1.81304e+06	1.50658e+06	1.7146e+06	1.56692e+06	1.86046e+06
pos-4.187_215.1879	215.188	4.187	12-amino-dodecanoic acid	C12H25NO2									5.74607e+07	1.14809e+07	8.27003e+06	1.12869e+07	6.66332e+07	3.84614e+07	3.07137e+07	2.02249e+07	9.67567e+06	3.56538e+06	1.01069e+07	8.74205e+06	1.3528e+07	7.07496e+06	5.9159e+06	6.0367e+06	2.37183e+07	2.21296e+07	2.25041e+07	2.306e+07	2.17489e+07	2.19964e+07	2.05453e+07
pos-5.06_362.18273	362.183	5.06	12-bromo-octadecanoic acid	C18H35BrO2									3.92344e+06	1.86284e+06	5.65639e+06	1.93782e+06	1.0693e+07	1.45352e+07	1.64627e+07	7.82907e+06	5.35906e+06	7.55412e+06	1.85146e+07	8.29574e+06	2.49097e+06	1.93244e+06	3.54116e+06	553515	4.52911e+06	4.51579e+06	4.54253e+06	3.9993e+06	3.76526e+06	3.5435e+06	3.19565e+06
neg-6.357_318.21883	318.219	6.357	12-epileukotriene b4	C20H32O4									5.08827e+06	465493	3.58442e+07	8.6368e+06	2.43047e+07	1.51413e+07	3.45567e+07	4.83172e+07	7.32257e+06	5.57449e+06	1.10208e+07	1.02245e+07	1.22658e+06	1.37552e+07	8.17807e+06	6.0886e+06	7.28857e+06	6.85321e+06	7.14185e+06	6.73117e+06	8.96845e+06	7.24282e+06	7.73515e+06
pos-5.059_318.21848	318.218	5.059	12-epileukotriene b4	C20H32O4									1.10213e+07	1.59265e+07	1.50835e+07	3.46391e+07	1.6537e+07	2.21672e+07	5.33527e+06	5.80097e+07	2.42187e+07	1.20111e+07	1.48639e+07	1.58323e+07	7.24104e+06	9.35943e+06	4.51007e+06	1.83243e+07	1.53676e+07	1.2143e+07	1.1521e+07	1.09473e+07	1.13281e+07	1.26061e+07	1.02967e+07
neg-5.069_336.22968	336.23	5.069	12-epileukotriene b4	C20H32O4									1.13955e+07	3.0714e+07	2.69646e+07	5.54446e+07	2.19199e+07	2.41679e+07	8.77701e+06	7.86848e+07	3.04491e+07	1.79482e+07	2.03774e+07	2.19948e+07	1.34247e+07	1.42888e+07	9.67714e+06	33947289	1.76306e+07	1.74124e+07	1.84057e+07	1.70935e+07	1.75199e+07	1.64863e+07	1.68777e+07
pos-4.921_318.21855	318.219	4.921	12-epileukotriene b4	C20H32O4									5.36345e+07	4.96598e+07	4.39707e+07	9.55182e+07	3.63381e+07	6.37111e+07	2.78307e+07	7.99808e+07	56968259	2.40373e+07	4.45902e+07	5.35573e+07	2.67714e+07	4.02356e+07	1.30127e+07	4.44071e+07	4.75276e+07	4.63532e+07	4.23792e+07	4.30203e+07	3.6805e+07	3.26432e+07	3.48575e+07
neg-4.932_336.22966	336.23	4.932	12-epileukotriene b4	C20H32O4									3.32516e+07	3.74533e+07	5.74991e+07	104730968	5.42954e+07	4.11417e+07	1.57666e+07	6.3352e+07	4.35297e+07	1.43191e+07	2.99752e+07	3.95584e+07	2.40564e+07	1.81197e+07	1.34924e+07	4.61574e+07	2.88076e+07	2.72643e+07	2.95764e+07	3.2432e+07	2.35964e+07	2.18041e+07	2.20836e+07
neg-6.577_318.21878	318.219	6.577	12-epileukotriene b4	C20H32O4									2.73042e+08	3.70639e+08	1001532353	1380032147	414117759	8.20731e+08	1.19229e+08	4.40983e+08	5.2371e+08	4.43797e+08	808799282	7.11838e+08	292287748	2.95642e+08	2.09908e+08	2.49507e+08	3.72749e+08	3.98927e+08	3.90795e+08	3.9509e+08	3.97084e+08	3.76303e+08	3.89913e+08
pos-6.571_318.21858	318.219	6.571	12-epileukotriene b4	C20H32O4									2.42415e+08	252651899	758614047	1315632995	2.49286e+08	7.75966e+08	8.76162e+07	3.46717e+08	3.42862e+08	3.21276e+08	6.60512e+08	3.96977e+08	1.75542e+08	2.46568e+08	1.52502e+08	1.50496e+08	3.96049e+08	3.81973e+08	3.43964e+08	3.39205e+08	2.96202e+08	2.80456e+08	2.62715e+08
neg-4.876_336.22955	336.23	4.876	12-epileukotriene b4	C20H32O4									1.21297e+07	7.0791e+06	4.39186e+07	7.30952e+07	1.14918e+07	1.40338e+07	5.5686e+06	1.06246e+07	1.24011e+07	1.54173e+07	3.94816e+07	2.26625e+07	5.3328e+06	1.23966e+07	6.95348e+06	4.69092e+06	1.28535e+07	1.19883e+07	1.14656e+07	1.01477e+07	9.42474e+06	8.93788e+06	8.31159e+06
neg-5.232_318.21879	318.219	5.232	12-epileukotriene b4	C20H32O4									482815	6.30328e+06	3.06796e+06	2.08118e+07	4.07442e+06	476878	602306	532843	467920	5.96013e+06	596226	288735	223794	439608	330943	614715	355647	395944	401800	374332	312997	333474	408476
pos-5.095_443.35997	443.36	5.095	12-hydroxy-12-octadecanoylcarnitine	C25H49NO5	HMDB0013154	Lipids and lipid-like molecules	Fatty Acyls						235816559	2.11891e+06	3.21925e+06	2.53599e+06	1.98899e+07	2.57955e+07	1.89805e+07	2.28237e+07	6.87089e+06	1.35255e+07	8.98671e+06	1.43266e+07	2.01816e+07	1.14925e+07	7.30503e+06	1.25697e+07	1.3655e+07	1.21276e+07	1.29869e+07	1.31927e+07	1.4743e+07	1.54931e+07	1.44935e+07
pos-5.053_490.28018	490.28	5.053	12-hydroxy-13-o-d-glucuronoside-octadec-9z-enoate	C24H42O10	HMDB0060118	Lipids and lipid-like molecules	Saccharolipids						120287	232482	37851.6	55345.4	143394	133388	95385.8	89481.5	63614.8	41809.4	55070.9	73393.4	152838	181473	76259.9	427035	140414	123141	136907	110939	93633	99343	69050.5
pos-3.516_490.27886	490.279	3.516	12-hydroxy-13-o-d-glucuronoside-octadec-9z-enoate	C24H42O10	HMDB0060118	Lipids and lipid-like molecules	Saccharolipids						503230	8.12919e+06	5.9519e+06	3.79299e+06	1.09085e+06	2.92225e+06	4.2684e+06	2.61916e+06	1.03609e+07	1.67382e+07	9.15727e+06	4.85653e+06	3.53536e+06	6.896e+06	9.09506e+06	2.55668e+06	5.59191e+06	5.157e+06	5.18155e+06	6.08199e+06	5.56736e+06	5.36441e+06	6.92686e+06
neg-3.52_490.27934	490.279	3.52	12-hydroxy-13-o-d-glucuronoside-octadec-9z-enoate	C24H42O10	HMDB0060118	Lipids and lipid-like molecules	Saccharolipids						60521.9	1.68989e+06	2.48412e+06	979045	71257.3	72125.8	1.14676e+06	457173	1.56845e+06	2.76525e+06	1.70478e+06	1.08269e+06	1.28064e+06	1.19676e+06	1.28595e+06	658251	1.00975e+06	1.14258e+06	1.21277e+06	1.03624e+06	1.14147e+06	1.02613e+06	1.24352e+06
neg-4.36_386.19401	386.194	4.36	12-hydroxyjasmonic acid 12-o-beta-d-glucoside	C19H30O8									1.93632e+06	1.1747e+06	1.98825e+06	1.1317e+06	3.06165e+06	2.95667e+06	5.12091e+06	1.73305e+06	1.94314e+06	2.47997e+06	1.66907e+06	3.12256e+06	1.12515e+06	662866	1.58752e+06	8.47069e+06	1.93951e+06	1.87663e+06	1.82802e+06	1.71119e+06	1.71264e+06	1.66539e+06	1.61293e+06
pos-3.125_386.19553	386.196	3.125	12-hydroxyjasmonic acid 12-o-beta-d-glucoside	C19H30O8									101760	1.46259e+06	2.02865e+06	1.38132e+06	186289	159263	1.55932e+06	221334	860477	4.65181e+06	1.18061e+06	765205	329374	1.50116e+06	582472	355616	1.39979e+06	1.19904e+06	1.39874e+06	1.18418e+06	1.08768e+06	1.20063e+06	1.33685e+06
neg-4.696_386.19372	386.194	4.696	12-hydroxyjasmonic acid 12-o-beta-d-glucoside	C19H30O8									5.25574e+06	1.82786e+06	588914	5.94958e+06	263451	640258	3.20934e+06	1.23755e+06	2.00169e+06	742564	1.67462e+06	1.77795e+06	965290	1.76073e+06	771016	2.05315e+06	6.10134e+06	6.47582e+06	5.85925e+06	9.66693e+06	10054532	1.03642e+07	1.15633e+07
neg-5.314_334.21415	334.214	5.314	12-oxo leukotriene b4	C20H30O4									1.64291e+07	1.693e+07	2.64707e+07	5.86545e+07	1.36261e+07	6.86382e+07	7.69894e+06	2.54651e+07	2.22705e+07	1.87105e+07	3.35649e+07	3.11278e+07	2.21055e+07	1.79222e+07	9.9189e+06	1.9941e+07	2.40545e+07	1.84061e+07	2.19412e+07	2.09778e+07	1.99946e+07	2.15804e+07	1.34864e+07
pos-7.056_292.20284	292.203	7.056	12-oxo phytodienoic acid	C18H28O3									1.13786e+06	660647	2.20706e+06	1.07688e+06	1.34645e+06	1.57828e+06	549904	792936	324808	736081	469935	740539	840647	250250	223064	221916	735764	674352	535673	384027	481524	454450	826762
neg-4.43_382.19862	382.199	4.43	12-oxo-20-trihydroxy-leukotriene b4	C20H30O7	HMDB0012553	Lipids and lipid-like molecules	Fatty Acyls						4.41827e+06	2.63762e+06	435255	1.12001e+06	145932	525014	1.86535e+07	183119	249034	238687	558618	130455	4.62678e+06	7.95834e+06	8.8541e+06	3.56603e+06	8.02453e+06	8.65052e+06	8.14868e+06	7.88739e+06	9.35751e+06	4.70548e+06	5.582e+06
neg-4.509_382.19859	382.199	4.509	12-oxo-20-trihydroxy-leukotriene b4	C20H30O7	HMDB0012553	Lipids and lipid-like molecules	Fatty Acyls						1.78743e+06	2.63762e+06	3.91611e+06	6.78993e+06	1.22142e+06	2.76139e+06	1.2605e+06	1.27421e+06	2.52602e+06	2.15941e+06	6.70546e+06	2.88691e+06	4.62678e+06	7.95834e+06	8.8541e+06	3.56603e+06	8.02453e+06	8.65052e+06	8.14868e+06	7.88739e+06	6.05828e+06	6.07859e+06	5.582e+06
neg-4.529_382.19859	382.199	4.529	12-oxo-20-trihydroxy-leukotriene b4	C20H30O7	HMDB0012553	Lipids and lipid-like molecules	Fatty Acyls						4.41827e+06	2.63762e+06	4.0041e+06	7.22245e+06	942519	3.55274e+06	1.54128e+06	1.4824e+06	3.17927e+06	2.40746e+06	4.23918e+06	3.21593e+06	4.62678e+06	7.95834e+06	8.8541e+06	3.56603e+06	8.02453e+06	8.65052e+06	8.14868e+06	7.88739e+06	9.35751e+06	4.70548e+06	5.582e+06
pos-6.805_405.28699	405.287	6.805	12-oxo-pda-ile	C24H39NO4									804964	270904	2.30776e+06	2.22448e+06	211667	1.10205e+06	116780	157456	405903	1.20645e+06	2.63752e+06	587444	261239	1.07718e+06	918319	235923	969960	669942	813570	694112	741951	668994	490638
neg-5.843_282.2191	282.219	5.843	12s-hydroxy-16-heptadecynoic acid	C17H30O3									94051.8	51572.4	69950.9	145314	138944	72922.6	84789.5	86236.8	77344.3	45508.2	56409.3	60334.2	825064	459356	802244	734935	251549	233063	281912	317669	313160	316135	214594
pos-4.608_282.21854	282.219	4.608	12s-hydroxy-16-heptadecynoic acid	C17H30O3									1.01306e+06	944833	726465	1.44317e+06	679916	1.93092e+06	957711	469734	682146	408923	308828	831121	5.29549e+06	7.60406e+06	3.92112e+06	5.95737e+06	4.53861e+06	4.91227e+06	4.71414e+06	4.97058e+06	5.54343e+06	6.51558e+06	4.77894e+06
pos-4.665_282.21856	282.219	4.665	12s-hydroxy-16-heptadecynoic acid	C17H30O3									1.36528e+06	2.85989e+06	442704	2.20807e+06	1.44379e+06	1.46227e+06	2.16272e+06	1.40039e+06	1.27463e+06	1.49139e+06	376531	1.37275e+06	9.6253e+06	1.59462e+07	1.15975e+07	6.55149e+06	8.59465e+06	8.15628e+06	1.04461e+07	9.37971e+06	9.72967e+06	4.80277e+06	9.1387e+06
neg-6.454_282.21916	282.219	6.454	12s-hydroxy-16-heptadecynoic acid	C17H30O3									189729	42857.5	36596.4	35309.2	87865.9	74539.1	53608	52799.2	52676.8	45645.2	58343.7	43583.6	692792	355408	312379	333117	241796	260557	208036	235314	237340	217827	239635
pos-5.841_282.21869	282.219	5.841	12s-hydroxy-16-heptadecynoic acid	C17H30O3									1.08075e+06	551758	982520	906644	758933	764576	638718	726957	680667	1.0295e+06	360654	535789	2.00002e+07	1.73894e+07	1.90471e+07	1.74054e+07	8.18149e+06	9.39977e+06	9.75486e+06	7.64418e+06	7.34814e+06	7.20139e+06	7.81644e+06
neg-5.556_282.21892	282.219	5.556	12s-hydroxy-16-heptadecynoic acid	C17H30O3									207279	254085	721483	1.65662e+06	984517	515009	548703	281308	178252	87607.4	431414	224536	443194	233921	227676	758582	209672	204871	283882	235391	280789	283960	245956
pos-4.89_282.21867	282.219	4.89	12s-hydroxy-16-heptadecynoic acid	C17H30O3									1.67007e+06	314209	545329	1.90512e+06	453666	1.11287e+06	721838	761238	553798	289524	453414	409852	3.73764e+06	6.9831e+06	2.90159e+06	2.32527e+06	2.37662e+06	2.34083e+06	2.78965e+06	2.36718e+06	2.57824e+06	2.13809e+06	2.3712e+06
pos-5.124_282.21858	282.219	5.124	12s-hydroxy-16-heptadecynoic acid	C17H30O3									3.14715e+06	1.12619e+06	1.66963e+06	3.87859e+06	878117	1.26091e+06	1.31811e+06	1.07878e+06	657765	653144	1.00422e+06	866358	5.92327e+06	1.20218e+07	5.90391e+06	4.69626e+06	5.7701e+06	5.20799e+06	4.51792e+06	4.40976e+06	4.69654e+06	4.00743e+06	4.763e+06
pos-4.296_294.21861	294.219	4.296	13(s)-hotre	C18H30O3				C16316	Metabolism	Lipid metabolism	alpha-Linolenic acid metabolism	map00592	2.09745e+07	3.18293e+06	9.5723e+06	2.07389e+07	1.58311e+06	1.36765e+07	2.01954e+06	6.07625e+06	3.82132e+06	3.08189e+06	6.98797e+06	5.12093e+06	1.82966e+06	9.67571e+06	923003	1.67872e+06	5.32015e+06	4.94162e+06	4.60954e+06	4.76527e+06	4.71659e+06	4.26641e+06	4.59985e+06
neg-5.676_334.21178	334.212	5.676	13,14-dihydro-15-keto prostaglandin a2	C20H30O4									1.02604e+07	2.68284e+06	685094	959816	872036	1.94682e+07	9.54931e+06	281607	1.42947e+06	1.67594e+06	1.88825e+06	2.30218e+06	1.4608e+06	1.11401e+06	776026	285918	1.51067e+06	1.51388e+06	1.71587e+06	1.46471e+06	1.79666e+06	1.70286e+06	1.43215e+06
neg-5.9_316.2034	316.203	5.9	13,14-dihydro-15-keto prostaglandin a2	C20H30O4									2.16883e+06	700864	6.60289e+06	1.84133e+06	2.73353e+06	3.3504e+06	5.87026e+06	3.28268e+06	1.47788e+06	1.31726e+06	1.80131e+06	1.72132e+06	2.86942e+06	1.07758e+07	6.37873e+06	3.5389e+06	2.74346e+06	2.83498e+06	2.69405e+06	2.57031e+06	3.05781e+06	2.78601e+06	2.58495e+06
neg-4.092_300.19337	300.193	4.092	13,14-dihydro-15-keto-tetranor prostaglandin f1尾	C16H28O5									802120	181502	365734	264432	277419	1.04781e+06	156541	252450	108046	73351.2	152278	55791.4	483887	478706	1.7169e+06	593141	659900	622064	634286	552790	659108	607606	611773
pos-0.889_334.14802	334.148	0.889	13-dimethylarsinoyl-tridecanoic acid	C15H31AsO3									8.58108e+06	5.13687e+06	3.81755e+06	4.36832e+06	8.85846e+06	5.68283e+06	4.77609e+06	5.04778e+06	6.23283e+06	5.66981e+06	4.85207e+06	5.05136e+06	5.46141e+06	4.33273e+06	8.39752e+06	6.1223e+06	3.16034e+06	2.9045e+06	3.18752e+06	3.68518e+06	3.53596e+06	3.96726e+06	3.81635e+06
neg-0.893_334.14824	334.148	0.893	13-dimethylarsinoyl-tridecanoic acid	C15H31AsO3									298721	1.7692e+06	2.10466e+06	1.84247e+06	1.07393e+06	400386	2.78238e+06	1.16294e+06	2.30505e+06	4.19707e+06	1.83193e+06	442214	1.0939e+06	449958	921438	2.17011e+06	1.75742e+06	1.83924e+06	1.46988e+06	1.5053e+06	1.55058e+06	777139	1.43619e+06
pos-6.478_537.37921	537.379	6.478	pe(22:0/0:0)	C27H56NO7P									471435	2.26012e+06	2.59065e+06	3.10407e+06	642562	667099	431518	652147	738517	1.97848e+06	1.77628e+06	1.64953e+06	1.37121e+06	1.74219e+06	1.15664e+06	1.04745e+06	1.11596e+06	1.69568e+06	1.41355e+06	1.52195e+06	1.64783e+06	1.56309e+06	1.19449e+06
pos-7.059_537.37821	537.378	7.059	pe(22:0/0:0)	C27H56NO7P									5.5442e+07	5.0846e+07	9.88486e+06	2.23465e+07	2.65979e+07	1.41011e+07	1.081e+07	2.63506e+07	1.66763e+07	1.1837e+07	2.63961e+07	1.32643e+07	2.43166e+07	3.79975e+07	5.14569e+07	6.38196e+07	3.14808e+07	3.30832e+07	2.9578e+07	2.86593e+07	2.77677e+07	2.92249e+07	2.35507e+07
pos-5.202_204.15085	204.151	5.202	13-tetradecen-2,4-diyn-1-ol	C14H20O									1.08052e+07	6.79175e+06	1.35079e+07	2.33674e+07	2.48837e+06	1.22517e+07	1.99836e+06	2.41009e+06	6.44071e+06	5.11266e+06	1.42499e+07	1.01713e+07	1.37007e+07	1.42799e+07	8.55942e+06	4.93461e+06	7.32243e+06	9.63111e+06	9.98899e+06	8.30975e+06	9.01682e+06	9.53281e+06	8.50183e+06
pos-5.283_262.19254	262.193	5.283	14:4(2e,4e,8e,10e)(6me[s],9me,12me[s])	C17H26O2									1.02856e+08	1.66495e+07	4.44852e+07	3.7164e+07	5.13071e+07	8.61993e+07	145739440	3.69477e+07	3.74886e+07	4.95259e+07	5.85567e+07	6.19018e+07	2.82437e+07	3.78464e+07	3.58185e+07	3.22954e+07	3.81977e+07	3.98262e+07	4.05858e+07	3.78945e+07	3.61795e+07	3.49482e+07	3.50189e+07
pos-6.59_262.19254	262.193	6.59	14:4(2e,4e,8e,10e)(6me[s],9me,12me[s])	C17H26O2									1.76332e+06	1.72563e+06	3.08567e+06	6.07463e+06	2.40625e+06	5.0502e+06	662923	5.94914e+06	2.84466e+06	2.79674e+06	3.97461e+06	2.97246e+06	2.1706e+06	2.00221e+06	1.22703e+06	885255	2.40683e+06	2.29131e+06	2.23028e+06	2.81189e+06	1.81816e+06	1.6637e+06	1.736e+06
pos-5.538_262.19257	262.193	5.538	14:4(2e,4e,8e,10e)(6me[s],9me,12me[s])	C17H26O2									1.20474e+06	476804	4.23122e+06	9.9661e+06	1.24801e+06	3.64725e+06	1.10685e+06	2.32673e+06	1.73264e+06	1.61117e+06	3.28306e+06	4.25072e+06	1.06264e+06	767120	1.18973e+06	863519	2.21679e+06	2.32404e+06	2.24561e+06	2.27836e+06	1.80025e+06	1.91472e+06	3.33812e+06
neg-5.572_262.19288	262.193	5.572	14:4(2e,4e,8e,10e)(6me[s],9me,12me[s])	C17H26O2									2.89655e+06	3.69769e+06	1.01442e+07	1.62881e+07	2.26494e+06	8.95364e+06	1.02563e+06	4.17496e+06	6.27461e+06	5.27032e+06	1.04861e+07	8.55631e+06	2.70369e+06	3.04491e+06	2.02131e+06	2.01577e+06	4.01416e+06	3.87278e+06	4.28441e+06	3.80456e+06	3.98382e+06	3.80477e+06	3.72442e+06
neg-5.687_262.19285	262.193	5.687	14:4(2e,4e,8e,10e)(6me[s],9me,12me[s])	C17H26O2									573008	924926	2.79313e+06	4.5879e+06	713049	1.69245e+06	185433	987891	1.32358e+06	1.14169e+06	2.36361e+06	1.46555e+06	483265	577067	449830	446227	930758	973927	1.04469e+06	961488	1.06882e+06	938328	878711
pos-4.428_262.19257	262.193	4.428	14:4(2e,4e,8e,10e)(6me[s],9me,12me[s])	C17H26O2									5.59711e+07	452659	262459	496217	6.55902e+06	1.42732e+06	480178	551284	1.4769e+06	424493	176778	710425	1.9706e+06	1.01094e+07	431131	636849	2.05433e+06	1.87618e+06	2.02049e+06	1.94518e+06	1.93334e+06	1.98217e+06	1.50493e+06
pos-7.154_310.22872	310.229	7.154	14'-apo-beta-carotenal	C22H30O				C06734					3.96888e+06	8.04026e+06	5.259e+06	8.35926e+06	7.57397e+06	5.99428e+06	8.03133e+06	1.73201e+06	1.83738e+07	6.51389e+06	7.61583e+06	2.68312e+06	2.99742e+06	6.89766e+06	7.77148e+06	4.1843e+06	7.84959e+06	7.03003e+06	6.44291e+06	6.21611e+06	5.54444e+06	4.25386e+06	4.00072e+06
pos-7.033_310.22875	310.229	7.033	14'-apo-beta-carotenal	C22H30O				C06734					1.81067e+06	5.15074e+06	6.87488e+06	1.60782e+07	3.44564e+06	3.34532e+06	6.48981e+06	3.34388e+06	9.3793e+06	7.80118e+06	7.7346e+06	2.27392e+06	1.40678e+06	3.57481e+06	9.82018e+06	4.71397e+06	7.55853e+06	7.41486e+06	7.01161e+06	5.98768e+06	8.6628e+06	4.02166e+06	5.30518e+06
neg-2.027_536.16102	536.161	2.027	1-4-beta-d-glucan	C18H32O18									4.65555e+08	1.66968e+08	1.60726e+08	1.37002e+08	943005066	548425420	1.96317e+08	2.52355e+08	2.04948e+08	1.90417e+08	187975779	3.50246e+08	5.9886e+08	1.98e+08	160680371	2.11054e+08	1.64727e+08	1.66969e+08	1.57668e+08	1.6477e+08	1.98314e+08	2.00918e+08	1.93543e+08
pos-0.896_536.16057	536.161	0.896	1-4-beta-d-glucan	C18H32O18									2.68269e+08	1.20533e+07	7.19013e+06	8.65032e+06	1.94774e+08	1.05718e+08	1.89319e+07	3.03248e+07	2.26735e+07	1.23971e+07	2.27955e+07	5.86715e+07	1.47958e+08	5.28576e+07	1.51423e+07	1.65337e+07	1.61629e+07	1.89733e+07	2.01794e+07	2.00344e+07	2.012e+07	1.9537e+07	1.65385e+07
neg-3.43_564.25456	564.255	3.43	14-chlorotetracosane-1,15-disulfate	C24H49ClO8S2									1.05893e+06	704735	3.55408e+06	385928	346722	585878	122191	265631	665839	2.05601e+06	458777	734713	1.26035e+06	853721	303957	416900	523372	516118	539682	508296	372850	575915	487665
neg-4.264_668.33	668.33	4.264	14-deacetylnudicauline	C36H48N2O10				C08673					147969	1.17989e+07	9.87951e+06	2.60464e+06	698757	1.12113e+06	2.5417e+06	858619	925473	1.09241e+07	5.44806e+06	4.85299e+06	6.49595e+06	2.58408e+06	6.87893e+06	4.85142e+06	2.6729e+06	5.33603e+06	3.99644e+06	3.43685e+06	3.40062e+06	3.39518e+06	3.6308e+06
neg-6.439_506.288	506.288	6.439	14-o-(alpha-l-rhamnopyranosyl)-7s,14r-dihydroxy-7,9,13,17-tetramethyl-2e,4e,8e,10e,12e,16e-octadecahexaenoic acid	C28H42O8									118351	230520	511896	333805	271349	112833	91027	102906	60907.5	141164	97381.2	196844	236115	1.09084e+06	821071	455305	583361	542565	547825	545496	459684	499351	461636
pos-3.246_662.34946	662.349	3.246	15-(2'-o-beta-d-glucopyranosyl-beta-d-glucopyranosyloxy)hexadecanoic acid 1',4''-lactone 6',6''-diacetate	C32H54O14									3.21847e+06	2.80419e+07	1.66774e+07	1.471e+07	8.42427e+06	4.23414e+06	1.73365e+07	1.01728e+07	2.33688e+07	3.10667e+07	1.25806e+07	9.05854e+06	1.33987e+07	8.20399e+06	1.65569e+07	2.7468e+07	1.74215e+07	1.44287e+07	1.4199e+07	1.39885e+07	1.67044e+07	1.76103e+07	1.81692e+07
pos-7.262_537.37819	537.378	7.262	pe(22:0/0:0)	C27H56NO7P									1.03006e+08	7.01676e+07	4.47432e+07	5.64161e+07	6.65322e+07	4.16588e+07	2.53704e+07	7.68935e+07	5.17883e+07	4.43748e+07	6.65988e+07	4.17633e+07	7.29348e+07	175438512	1.84707e+08	2.16122e+08	8.4017e+07	8.04927e+07	9.61871e+07	8.24214e+07	7.56913e+07	7.01576e+07	5.90567e+07
pos-5.948_537.378	537.378	5.948	pe(22:0/0:0)	C27H56NO7P									2.04051e+06	1.99564e+06	3.34262e+06	2.63895e+06	1.40982e+06	1.85185e+06	1.66921e+06	1.01295e+06	1.38576e+06	3.11034e+06	2.27258e+06	2.09601e+06	2.63138e+06	8.3112e+06	5.09918e+06	2.2134e+06	3.54451e+06	3.43244e+06	3.52003e+06	3.74034e+06	2.90155e+06	3.1526e+06	3.17466e+06
pos-6.227_537.37771	537.378	6.227	pe(22:0/0:0)	C27H56NO7P									1.88582e+07	1.31971e+07	2.32803e+07	2.05312e+07	1.09407e+07	2.051e+07	2.0121e+07	5.91603e+06	9.10393e+06	2.35078e+07	1.87983e+07	1.4613e+07	3.30815e+07	1.03564e+08	8.60795e+07	2.5138e+07	5.82751e+07	5.48147e+07	5.51815e+07	3.91572e+07	3.76057e+07	3.39465e+07	3.5915e+07
pos-4.759_334.21327	334.213	4.759	15(r)-lipoxin a4	C20H32O5									9.07129e+06	5.67941e+06	3.77836e+07	1.03128e+07	3.55383e+06	6.31057e+06	9.61075e+06	2.40281e+07	3.20575e+06	4.0562e+06	6.84817e+06	5.92965e+06	4.01313e+06	9.79987e+06	4.25016e+06	2.54746e+06	5.19406e+06	5.18165e+06	5.71625e+06	5.3774e+06	5.29287e+06	4.70923e+06	6.37683e+06
pos-4.494_334.21345	334.213	4.494	15(r)-lipoxin a4	C20H32O5									6.32158e+07	4.54378e+07	9.25424e+07	1.27839e+08	2.09895e+07	1.11989e+08	8.20661e+06	1.09492e+07	4.13444e+07	3.12126e+07	6.42199e+07	8.69991e+07	7.23562e+07	8.33924e+07	3.06541e+07	3.83963e+07	4.95892e+07	4.84795e+07	4.65737e+07	6.57234e+07	5.93416e+07	5.31856e+07	4.44015e+07
neg-4.273_340.15184	340.152	4.273	15-deacetylneosolaniol	C17H24O7	HMDB0036157	Lipids and lipid-like molecules	Prenol lipids	C02951					87540.3	560463	74424.8	152864	1.96584e+06	4.62885e+06	1.76553e+07	9.35666e+06	359059	158881	271395	165789	925784	1.66248e+06	2.15922e+06	980016	1.14756e+06	1.36886e+06	1.24624e+06	1.0656e+06	1.20758e+06	1.20161e+06	1.27658e+06
pos-5.198_390.23701	390.237	5.198	15-deoxy-未12,14-prostaglandin j2-2-glycerol ester	C23H34O5	HMDB0013656	Lipids and lipid-like molecules	Fatty Acyls						2.59899e+07	1.41132e+07	2.28734e+07	3.73476e+07	6.31807e+06	2.24407e+07	1.47611e+06	6.06011e+06	8.59487e+06	7.09508e+06	3.14882e+07	1.46762e+07	1.09878e+07	9.23381e+06	5.95279e+06	4.6512e+06	1.43103e+07	1.4117e+07	1.42953e+07	1.31369e+07	1.20068e+07	7.23527e+06	7.28601e+06
neg-6.917_535.36354	535.364	6.917	pe(22:1(11z)/0:0)	C27H54NO7P									6.26853e+07	6.75149e+07	1.09243e+07	2.26836e+07	9.75466e+07	3.25703e+07	2.26504e+07	5.69425e+07	5.63725e+07	3.64082e+07	5.47338e+07	3.50141e+07	1.07041e+08	1.62781e+08	1.5197e+08	2.04968e+08	6.47779e+07	6.63803e+07	6.82744e+07	6.91434e+07	6.3614e+07	5.69332e+07	5.79253e+07
neg-7.902_535.36312	535.363	7.902	pe(22:1(11z)/0:0)	C27H54NO7P									5.74972e+06	5.50742e+06	3.30452e+06	4.11429e+06	1.46582e+06	1.51052e+06	945612	1.42012e+06	1.48328e+06	4.4625e+06	4.54087e+06	3.61116e+06	2.93895e+06	2.76022e+06	2.80838e+06	2.65508e+06	2.21414e+06	2.21468e+06	1.67682e+06	1.95809e+06	1.82191e+06	1.89398e+06	2.00203e+06
pos-5.254_353.25555	353.256	5.254	15-epi prostaglandin a1	C20H32O4									2.11056e+07	2.8439e+07	1.1737e+08	1.97421e+08	1.03677e+07	4.31621e+07	7.41263e+06	2.05199e+07	2.71149e+07	3.8729e+07	6.59497e+07	5.30025e+07	1.51757e+07	1.78281e+07	1.12599e+07	9.20127e+06	3.67445e+07	3.58719e+07	3.59101e+07	3.2173e+07	2.89859e+07	2.82764e+07	2.49256e+07
neg-5.418_394.27165	394.272	5.418	15-hete-g	C23H38O5									243477	164219	1.44365e+06	3.08914e+06	279504	623768	235697	314326	785337	1.00207e+06	878435	789547	202603	105068	153543	151688	371684	290592	296478	236339	276209	293999	369154
pos-5.307_377.25543	377.255	5.307	15-hete-gly	C22H35NO4									1.83084e+07	8.41292e+06	1.37513e+07	2.12676e+07	1.04391e+06	4.80743e+06	1.39832e+06	2.11332e+06	5.74172e+06	5.95707e+06	9.16268e+06	8.75906e+06	6.53361e+06	6.16859e+06	2.96278e+06	3.91769e+06	7.93654e+06	6.84688e+06	6.8191e+06	8.03373e+06	7.77192e+06	6.11274e+06	4.85656e+06
neg-6.882_427.23916	427.239	6.882	15-hete-t	C22H37NO5S									3.29503e+06	830924	1.09016e+06	1.26332e+06	1.06458e+06	676574	776850	1.37275e+06	1.00531e+06	199355	1.593e+06	881076	1.78642e+06	2.74053e+06	4.10064e+06	1.91268e+06	2.25818e+06	2.1944e+06	2.35131e+06	2.38956e+06	2.30836e+06	2.27583e+06	2.12666e+06
neg-5.903_427.239	427.239	5.903	15-hete-t	C22H37NO5S									8.72123e+06	560066	1.02723e+06	2.17182e+06	527524	2.91051e+06	399854	1.37882e+06	1.5341e+06	1.32394e+06	1.97224e+06	1.88275e+06	778671	846421	391159	363179	409951	684696	798179	630618	802674	804290	744459
pos-4.27_409.24553	409.246	4.27	15-isolg hydroxylactam-ethanolamine	C22H35NO6									4.09016e+06	1.03065e+06	1.00468e+06	4.52953e+06	434664	1.6029e+06	743677	401446	917903	652883	1.45551e+06	551426	650224	2.11234e+06	355110	506785	1.20784e+06	1.37413e+06	1.11129e+06	1.06671e+06	1.20722e+06	1.27014e+06	1.27532e+06
pos-1.361_230.13179	230.132	1.361	15-octadecene-9,11,13-triynoic acid	C15H18O2									3.70762e+06	4.99313e+06	3.35816e+06	3.78852e+06	3.85664e+06	3.83892e+06	3.92827e+06	4.61143e+06	5.61174e+06	6.07979e+06	4.12615e+06	3.93272e+06	2.77267e+06	2.96546e+06	2.50907e+06	2.95949e+06	2.42097e+06	2.20045e+06	2.64505e+06	3.53712e+06	3.40067e+06	2.13328e+06	3.51354e+06
pos-0.898_230.13152	230.132	0.898	15-octadecene-9,11,13-triynoic acid	C15H18O2									6.31486e+06	1.0081e+07	9.59651e+06	7.49405e+06	6.07356e+06	6.16756e+06	7.08404e+06	1.04636e+07	9.97907e+06	1.52383e+07	4.94678e+06	6.80357e+06	5.47018e+06	5.10133e+06	6.84672e+06	1.10155e+07	5.40712e+06	5.95362e+06	5.95068e+06	7.87359e+06	6.42054e+06	6.19539e+06	7.2125e+06
pos-6.576_230.1299	230.13	6.576	15-octadecene-9,11,13-triynoic acid	C15H18O2									1.37662e+06	1.48671e+06	3.85129e+06	5.77894e+06	1.34251e+06	3.75153e+06	322510	1.70677e+06	1.54823e+06	1.6751e+06	3.9177e+06	1.88575e+06	1.04063e+06	788480	516573	469697	1.94466e+06	2.0308e+06	1.76994e+06	1.30578e+06	1.21958e+06	1.29712e+06	1.44765e+06
pos-6.106_230.12987	230.13	6.106	15-octadecene-9,11,13-triynoic acid	C15H18O2									2.77927e+06	2.24895e+06	2.13173e+06	4.12836e+06	1.09967e+06	2.86728e+06	407491	1.71078e+06	1.42664e+06	1.74034e+06	1.64795e+06	2.21489e+06	2.81319e+06	2.19297e+06	1.94744e+06	965805	1.7127e+06	2.64579e+06	1.81611e+06	1.47572e+06	1.61868e+06	1.78512e+06	1.24301e+06
pos-1.481_230.13179	230.132	1.481	15-octadecene-9,11,13-triynoic acid	C15H18O2									608566	3.93143e+06	7.88093e+06	3.30532e+06	1.66755e+06	1.18057e+06	3.13264e+06	1.83436e+06	5.05715e+06	7.45937e+06	4.24806e+06	4.39185e+06	3.87499e+06	3.01047e+06	2.32747e+06	4.55786e+06	4.222e+06	3.57158e+06	3.61633e+06	3.55475e+06	3.36912e+06	4.1298e+06	4.18898e+06
neg-6.323_322.25035	322.25	6.323	15-oxo-11z,13e-eicosadienoic acid	C20H34O3									1.30935e+06	2.5e+06	3.46749e+06	9.19891e+06	1.1798e+07	7.51806e+06	4.18326e+06	1.32275e+07	2.52228e+06	4.40163e+06	3.60156e+06	4.98766e+06	1.75854e+06	660532	1.17099e+06	5.12653e+06	4.22991e+06	4.43851e+06	3.70864e+06	4.44604e+06	4.11193e+06	4.19948e+06	5.15142e+06
neg-6.187_322.2503	322.25	6.187	15-oxo-11z,13e-eicosadienoic acid	C20H34O3									3.42983e+06	3.30973e+06	5.78849e+06	1.33519e+07	2.40762e+06	7.23408e+06	1.9955e+06	3.05661e+06	1.99466e+06	1.80762e+06	3.20517e+06	2.60218e+06	439189	1.34995e+06	337951	2.05145e+06	2.06551e+06	2.37044e+06	2.15202e+06	1.85868e+06	2.17941e+06	1.778e+06	1.82914e+06
pos-6.929_322.2499	322.25	6.929	15-oxo-11z,13e-eicosadienoic acid	C20H34O3									1.32159e+06	516225	2.33129e+06	4.1337e+06	489577	1.49152e+06	577584	689053	369294	837886	776379	572070	458187	306327	823828	495368	751561	731031	881746	813626	643723	329288	787218
neg-6.782_322.25034	322.25	6.782	15-oxo-11z,13e-eicosadienoic acid	C20H34O3									3.28719e+07	9.94206e+07	122402533	2.19125e+08	1.72403e+07	4.71028e+07	3.5121e+06	7.18256e+07	3.25914e+07	4.1883e+07	4.727e+07	3.96142e+07	1.35502e+07	9.96874e+06	1.03778e+07	1.47357e+07	3.75528e+07	3.99327e+07	3.79113e+07	3.85834e+07	3.70113e+07	3.37622e+07	3.77505e+07
neg-6.003_322.25027	322.25	6.003	15-oxo-11z,13e-eicosadienoic acid	C20H34O3									692351	669460	3.18956e+06	7.44661e+06	417051	1.92901e+06	238692	308787	371809	348923	936635	906983	228062	316654	256417	140840	897889	822264	847874	919143	786498	965015	818052
neg-6.609_322.25039	322.25	6.609	15-oxoede	C20H34O3									5.29969e+06	351517	4.82817e+06	872740	1.96182e+06	1.85683e+06	1.78983e+06	1.03708e+07	1.40356e+06	828994	1.44383e+06	931245	115521	855708	354946	204008	868423	1.29106e+06	1.16319e+06	957572	766158	845849	1.0812e+06
pos-7.02_322.24976	322.25	7.02	15-oxoede	C20H34O3									769665	352604	654800	1.1735e+06	540422	1.03742e+06	421884	717237	226347	363094	397475	818793	2.18034e+06	1.2332e+06	1.67122e+07	1.22591e+07	3.66594e+06	3.38142e+06	2.7377e+06	2.82336e+06	4.77735e+06	3.62139e+06	3.19541e+06
neg-5.124_390.24049	390.24	5.124	15r-pga2 methyl ester, 15-acetate	C23H34O5									558396	521121	1.21447e+06	1.62031e+06	337101	715015	96786.8	349275	481718	454563	599821	671928	536776	417984	210541	296440	438511	465635	377884	464188	475056	427897	434829
pos-6.667_535.36247	535.362	6.667	pe(22:1(11z)/0:0)	C27H54NO7P									4.35734e+06	6.83142e+06	2.47307e+06	3.19707e+06	2.2656e+06	5.03162e+06	709816	4.36533e+06	5.33702e+06	7.04862e+06	8.85485e+06	5.52878e+06	8.70486e+06	2.3491e+07	1.91953e+07	2.34319e+07	1.43969e+07	1.35479e+07	8.58133e+06	1.27383e+07	1.09566e+07	9.76059e+06	6.56195e+06
pos-6.253_535.36238	535.362	6.253	pe(22:1(11z)/0:0)	C27H54NO7P									1.74234e+07	1.04933e+07	2.2247e+06	6.52326e+06	1.01856e+07	5.45632e+06	6.67065e+06	4.11151e+06	1.75118e+07	3.55713e+06	7.84127e+06	5.15054e+06	1.19378e+07	1.54751e+07	1.69822e+07	1.92175e+07	7.10736e+06	8.46696e+06	8.8777e+06	8.61855e+06	8.51323e+06	8.61492e+06	9.36688e+06
pos-6.427_535.36228	535.362	6.427	pe(22:1(11z)/0:0)	C27H54NO7P									7.6613e+07	9.43171e+07	4.52897e+07	6.50326e+07	6.98998e+07	5.1611e+07	2.2186e+07	5.69897e+07	4.76841e+07	3.6202e+07	5.90675e+07	3.3394e+07	6.35558e+07	1.66392e+08	1.33823e+08	1.79349e+08	1.17402e+08	9.46431e+07	7.53152e+07	7.50654e+07	7.81121e+07	63497300	6.69649e+07
pos-5.245_362.24463	362.245	5.245	16,16-dimethyl prostaglandin a2	C22H34O4									2.95746e+07	5.60911e+06	5.47283e+06	1.14951e+07	5.37552e+06	2.5235e+07	2.67546e+07	4.42429e+06	4.52311e+06	4.92389e+06	1.5538e+07	8.5434e+06	1.11385e+07	1.71847e+07	5.00864e+06	5.35648e+06	1.0787e+07	8.8272e+06	6.64142e+06	6.78573e+06	7.38461e+06	6.76771e+06	6.03776e+06
neg-5.346_362.24543	362.245	5.346	16,16-dimethyl-pga2	C22H34O4									5.11834e+06	3.18069e+06	7.95756e+06	9.78559e+06	2.68365e+06	6.28274e+06	1.98054e+07	1.45151e+07	1.05202e+07	1.09486e+07	2.83614e+06	7.93779e+06	7.3064e+06	5.32217e+06	9.93201e+06	6.9467e+06	3.40564e+06	5.39803e+06	2.95004e+06	2.98674e+06	3.45348e+06	3.83711e+06	5.36606e+06
pos-6.016_362.24468	362.245	6.016	16,16-dimethyl-pga2	C22H34O4									8.70054e+06	2.81302e+06	6.27192e+06	1.76917e+07	4.48665e+06	3.57027e+07	1.77662e+06	9.55313e+06	6.72126e+06	7.34997e+06	1.42413e+07	1.19979e+07	7.04677e+06	4.6513e+06	3.49455e+06	1.82354e+06	6.73137e+06	6.95812e+06	5.4828e+06	4.82921e+06	6.61427e+06	5.55709e+06	4.80801e+06
neg-5.012_362.24548	362.245	5.012	16,16-dimethyl-pga2	C22H34O4									3.74746e+07	4.24966e+06	2.47211e+06	5.85354e+06	3.75232e+07	8.37431e+06	7.65792e+06	1.46109e+07	3.75791e+06	3.26979e+06	2.01183e+06	4.52005e+06	5.93479e+07	1.99648e+07	4.76258e+06	5.05287e+06	3.52666e+06	3.58031e+06	3.7643e+06	3.64453e+06	6.37808e+06	4.13944e+06	6.17388e+06
pos-5.917_362.24467	362.245	5.917	16,16-dimethyl-pga2	C22H34O4									3.33091e+07	1.42552e+07	3.26719e+07	8.38482e+07	1.33189e+07	1.13294e+08	9.13345e+06	3.72739e+07	4.05012e+07	4.11557e+07	8.35328e+07	5.54256e+07	1.82802e+07	2.33138e+07	1.14236e+07	7.6556e+06	3.01713e+07	3.54032e+07	2.81753e+07	2.67462e+07	2.48474e+07	2.31978e+07	2.3234e+07
neg-5.923_362.24536	362.245	5.923	16,16-dimethyl-pga2	C22H34O4									6.25754e+07	3.69807e+07	8.56877e+07	2.0185e+08	3.3632e+07	2.25832e+08	2.80736e+07	9.26561e+07	1.29788e+08	1.14525e+08	2.15777e+08	1.57417e+08	5.08911e+07	5.53886e+07	3.2481e+07	2.26498e+07	6.22169e+07	6.2667e+07	6.44989e+07	5.85972e+07	6.02999e+07	6.2698e+07	6.38831e+07
pos-4.899_362.24456	362.245	4.899	16,16-dimethyl-pga2	C22H34O4									1.36471e+07	2.62776e+07	6.9655e+06	2.12369e+07	4.47799e+06	4.22209e+07	6.32715e+06	1.35183e+07	1.66801e+07	1.21583e+07	2.32099e+07	1.97456e+07	5.64152e+06	1.06831e+07	3.1865e+06	3.39661e+06	9.72256e+06	8.36505e+06	1.09e+07	7.81678e+06	8.25488e+06	7.23847e+06	8.88383e+06
neg-6.023_362.24536	362.245	6.023	16,16-dimethyl-pga2	C22H34O4									3.94705e+07	2.2225e+07	5.54516e+07	1.46124e+08	2.2263e+07	1.36344e+08	1.57357e+07	7.05828e+07	7.94543e+07	6.82741e+07	1.24316e+08	1.00476e+08	3.22369e+07	2.94663e+07	1.57113e+07	1.28843e+07	3.86491e+07	3.97613e+07	3.71955e+07	3.98368e+07	3.62079e+07	4.01776e+07	3.66443e+07
neg-5.549_362.24541	362.245	5.549	16,16-dimethyl-pga2	C22H34O4									3.23524e+07	9.31583e+06	1.40095e+07	1.30049e+07	3.68608e+06	1.89968e+07	1.26013e+07	1.62114e+07	9.29956e+06	3.71274e+06	1.44241e+07	1.03157e+07	7.30884e+06	2.02072e+07	5.9979e+06	4.34332e+06	8.42326e+06	7.46239e+06	8.79367e+06	8.01877e+06	7.94716e+06	8.37778e+06	9.066e+06
neg-5.665_362.2454	362.245	5.665	16,16-dimethyl-pga2	C22H34O4									2.55684e+07	1.07656e+07	1.93995e+07	1.62744e+07	2.86447e+06	1.31316e+07	5.53359e+06	1.57205e+07	1.09623e+07	8.25455e+06	1.55546e+07	1.19368e+07	9.73582e+06	1.77446e+07	3.98791e+06	3.98866e+06	1.03566e+07	1.12617e+07	1.10977e+07	8.98155e+06	5.63594e+06	10299723	1.11822e+07
neg-5.818_362.24536	362.245	5.818	16,16-dimethyl-pga2	C22H34O4									4.15812e+07	1.79681e+07	8.95983e+07	1.78479e+08	1.87769e+07	1.05056e+08	4.21515e+06	1.87829e+07	2.9464e+07	5.24611e+07	125324902	9.52183e+07	3.32922e+07	2.51357e+07	9.83325e+06	4.9462e+06	2.6469e+07	2.34507e+07	2.79102e+07	2.47278e+07	2.88252e+07	3.03401e+07	3.33342e+07
neg-5.76_380.25573	380.256	5.76	16,16-dimethyl-pgd2	C22H36O5									427735	137666	101027	1.07788e+06	676780	5.18746e+06	354150	2.58461e+06	503228	602077	778509	1.1935e+06	372361	400757	151210	207979	445723	441321	310025	283454	448347	351729	428477
neg-4.911_380.25575	380.256	4.911	16,16-dimethyl-pgd2	C22H36O5									6.95059e+07	3.289e+07	9.18471e+07	2.33335e+08	5.40703e+07	296575929	3.77328e+07	1.36456e+08	1.4001e+08	99771629	206513836	158787639	4.38527e+07	4.59138e+07	2.97226e+07	2.57511e+07	8.06276e+07	7.97175e+07	7.65622e+07	7.56141e+07	6.29278e+07	5.88795e+07	6.4058e+07
neg-4.65_380.25803	380.258	4.65	16,16-dimethyl-pgd2	C22H36O5									419065	949468	184562	417912	503304	288929	748394	842393	482749	112513	166987	198709	1.89476e+06	3.16797e+06	2.24808e+06	1.39549e+06	646138	522568	570054	498450	606987	782694	760573
neg-4.655_380.25582	380.256	4.655	16,16-dimethyl-pgd2	C22H36O5									5.4855e+07	7.65653e+06	2.82437e+07	2.73657e+07	1.25546e+07	3.73015e+07	2.23408e+07	3.55277e+07	1.94559e+07	9.11603e+06	3.03102e+07	2.3392e+07	12336944	3.71333e+07	1.23334e+07	2.99166e+06	1.45073e+07	1.37991e+07	1.5245e+07	1.47656e+07	1.5901e+07	1.60531e+07	1.55492e+07
neg-5.18_382.27138	382.271	5.18	16,16-dimethyl-pge1	C22H38O5									543495	326640	428102	892002	697069	1.67301e+06	960980	4.71227e+06	376345	265617	217281	363755	177484	242453	141943	183696	370205	364855	349033	403460	312314	405102	380654
pos-7.149_382.27107	382.271	7.149	16,16-dimethyl-pge1	C22H38O5									2.33374e+06	7.99565e+06	3.1133e+06	5.28266e+06	1.60381e+07	4.42384e+06	3.70402e+06	860384	2.92069e+07	4.82301e+06	3.00196e+06	1.13503e+06	3.71638e+06	3.20115e+06	3.95808e+06	2.22214e+06	3.04763e+06	2.78674e+06	2.63105e+06	2.24099e+06	3.05994e+06	1.99138e+06	2.06508e+06
neg-5.985_382.27132	382.271	5.985	16,16-dimethyl-pge1	C22H38O5									3.63903e+06	1.39643e+06	6.06888e+06	1.39304e+07	459651	8.64232e+06	1.44646e+06	434421	1.45356e+06	3.44624e+06	6.32159e+06	4.29827e+06	1.11523e+06	1.65831e+06	1.3611e+06	410460	2.2052e+06	3.05592e+06	2.35921e+06	2.63034e+06	2.64385e+06	2.92661e+06	2.47381e+06
pos-6.094_382.27085	382.271	6.094	16,16-dimethyl-pge1	C22H38O5									1.13485e+07	2.6651e+06	1.17639e+07	1.74277e+07	687059	9.92841e+06	4.97981e+06	1.61378e+06	5.29572e+06	5.54121e+06	4.98262e+06	4.72728e+06	1.65615e+06	8.93625e+06	3.70869e+06	818810	6.92436e+06	7.45004e+06	7.20411e+06	5.73958e+06	6.93764e+06	6.52711e+06	6.14817e+06
neg-6.106_382.27131	382.271	6.106	16,16-dimethyl-pge1	C22H38O5									4.40191e+06	1.19225e+06	6.05376e+06	1.28224e+07	165026	8.04446e+06	563491	406395	1.42516e+06	2.05154e+06	5.36529e+06	3.49438e+06	1.55361e+06	1.5015e+06	1.13798e+06	702662	2.51683e+06	2.16727e+06	2.27916e+06	2.57429e+06	2.19432e+06	2.53197e+06	2.41883e+06
pos-7.033_382.27114	382.271	7.033	16,16-dimethyl-pge1	C22H38O5									1.33167e+06	8.62662e+06	5.74079e+06	1.31837e+07	3.06178e+06	1.19849e+06	5.17725e+06	851939	1.13607e+07	7.85764e+06	6.24263e+06	2.05355e+06	1.24433e+06	2.2242e+06	9.04321e+06	3.73924e+06	7.22619e+06	6.82506e+06	5.741e+06	5.29672e+06	7.13048e+06	4.39185e+06	2.99666e+06
neg-6.337_342.21899	342.219	6.337	16,17-epoxy-dha	C22H30O3									1.18561e+08	103490831	1.71302e+08	2.39542e+08	1.07034e+08	1.65378e+08	5.13107e+07	1.71528e+08	1.20652e+08	109878078	8.78884e+07	1.64832e+08	1.45036e+08	1.1178e+08	1.11654e+08	1.04026e+08	9.41919e+07	9.79303e+07	9.72309e+07	9.77116e+07	9.98386e+07	9.1273e+07	9.71768e+07
pos-6.333_342.21845	342.218	6.333	16,17-epoxy-dha	C22H30O3									1.46412e+08	9.4271e+07	1.63698e+08	2.31789e+08	9.0569e+07	189708146	5.17538e+07	151479249	9.38677e+07	9.286e+07	9.51287e+07	1.23479e+08	1.25216e+08	1.23438e+08	104145812	8.71947e+07	1.16741e+08	1.10859e+08	107994893	1.0487e+08	9.29445e+07	8.77365e+07	7.65068e+07
pos-4.661_342.21847	342.218	4.661	16,17-epoxy-dha	C22H30O3									5.20487e+08	2.3957e+08	4.2966e+08	7.36256e+08	1.17866e+08	928484229	1.36494e+08	2.58037e+08	2.78796e+08	2.25566e+08	4.33166e+08	3.53779e+08	293347075	3.54707e+08	2.07037e+08	1.70579e+08	2.98132e+08	290556472	2.97774e+08	2.9701e+08	2.44397e+08	2.29953e+08	2.32128e+08
neg-5.981_342.21905	342.219	5.981	16,17-epoxy-dha	C22H30O3									1.31624e+06	545892	1.48089e+06	3.16935e+06	528645	2.42514e+06	856914	913263	3.94068e+06	2.66751e+06	6.53262e+06	3.21453e+06	736737	860234	456144	259112	1.10373e+06	1.00177e+06	1.22256e+06	1.06952e+06	1.32943e+06	1.0187e+06	932513
pos-4.934_342.21843	342.218	4.934	16,17-epoxy-dha	C22H30O3									8.08899e+08	1.62026e+08	7.18274e+07	1.33173e+08	7.32378e+07	2.916e+08	1.20397e+08	3.56432e+08	9.68893e+07	9.8666e+07	7.0143e+07	7.6036e+07	9.71411e+07	3.39123e+08	7.80998e+07	1.08947e+08	1.18737e+08	1.31755e+08	1.31862e+08	1.29094e+08	112668643	9.56205e+07	9.34173e+07
neg-5.518_342.21882	342.219	5.518	16,17-epoxy-dha	C22H30O3									1.04724e+07	6.0688e+06	1.22252e+07	1.50419e+07	2.47478e+06	1.5592e+07	2.08059e+06	5.13415e+06	7.09189e+06	7.20076e+06	1.17612e+07	8.83496e+06	6.03664e+06	6.44902e+06	5.37793e+06	3.72286e+06	5.74137e+06	5.61155e+06	5.61986e+06	5.17759e+06	5.50505e+06	5.44835e+06	5.43052e+06
pos-5.597_342.21846	342.218	5.597	16,17-epoxy-dha	C22H30O3									2.21014e+08	9.04849e+07	2.29417e+08	3.7029e+08	5.69432e+07	3.03629e+08	3.18259e+07	7.99658e+07	1.09758e+08	8.18296e+07	1.8053e+08	1.30296e+08	119764042	1.41802e+08	6.96202e+07	5.95921e+07	1.2688e+08	1.18466e+08	1.18435e+08	1.07845e+08	9.49795e+07	9.90181e+07	8.75084e+07
neg-6.073_342.21904	342.219	6.073	16,17-epoxy-dha	C22H30O3									5.6283e+06	791417	9.05303e+06	1.418e+07	1.22768e+06	6.4443e+06	6.07806e+06	1.02133e+06	1.69623e+06	2.68134e+06	5.68301e+06	2.61763e+06	1.35595e+06	5.38948e+06	2.79254e+06	1.79417e+06	4.33276e+06	3.495e+06	3.19618e+06	3.65979e+06	3.4737e+06	3.86606e+06	3.60967e+06
neg-5.317_342.21898	342.219	5.317	16,17-epoxy-dha	C22H30O3									8.53943e+06	6.77169e+06	8.09585e+06	1.29688e+07	814743	1.5592e+07	798612	1.06488e+06	5164972	4.49709e+06	6.30062e+06	4.47426e+06	4.51243e+06	3.41299e+06	2.71401e+06	2.77749e+06	4.59236e+06	4.11301e+06	4.2078e+06	4.08111e+06	4.00343e+06	3.73588e+06	4.90941e+06
neg-6.052_342.21897	342.219	6.052	16,17-epoxy-dha	C22H30O3									5.6283e+06	609692	9.05303e+06	1.418e+07	1.06927e+06	6.4443e+06	6.07806e+06	876280	1.60804e+06	2.68134e+06	5.68301e+06	2.61763e+06	1.237e+06	5.38948e+06	2.79254e+06	1.79417e+06	4.33276e+06	3.495e+06	3.19618e+06	3.65979e+06	3.4737e+06	3.86606e+06	3.60967e+06
pos-5.183_342.21852	342.219	5.183	16,17-epoxy-dha	C22H30O3									3.05527e+07	1.63151e+07	1.69274e+07	1.41798e+07	8.35122e+06	1.47797e+07	6.22639e+06	7.97055e+06	1.27798e+07	1.25681e+07	5.37345e+06	1.23592e+07	1.30899e+07	1.09966e+07	5.53863e+06	9.93954e+06	1.79359e+07	1.47084e+07	1.43375e+07	1.4029e+07	1.68797e+07	1.15962e+07	1.47164e+07
neg-5.763_342.21895	342.219	5.763	16,17-epoxy-dha	C22H30O3									1.40671e+06	1.94164e+06	3.71467e+06	3.74854e+06	626372	1.78667e+06	482797	1.71859e+06	1.0048e+06	1.16903e+06	1.07324e+06	919171	2.64869e+06	2.26077e+06	1.51434e+06	1.2538e+06	1.70838e+06	1.48492e+06	1.20744e+06	1.99945e+06	1.40345e+06	1.28798e+06	926341
pos-5.305_342.2184	342.218	5.305	16,17-epoxy-dha	C22H30O3									4.36939e+07	2.43533e+07	2.75237e+07	3.37542e+07	6.39543e+06	3.24565e+07	8.28307e+06	8.28629e+06	1.89659e+07	1.75635e+07	1.81848e+07	2.04803e+07	1.81137e+07	2.02407e+07	1.03074e+07	1.50953e+07	2.65293e+07	1.96975e+07	1.97489e+07	2.24882e+07	2.1626e+07	1.51886e+07	1.90312e+07
neg-6.653_342.21904	342.219	6.653	16,17-epoxy-dha	C22H30O3									4.03319e+06	2.43703e+06	8.38503e+06	1.51169e+07	1.35491e+06	6.14031e+06	1.04087e+06	1.00026e+06	2.79832e+06	2.65189e+06	5.42121e+06	3.83007e+06	4.31797e+06	5.93992e+06	4.01837e+06	2.65149e+06	4.04513e+06	4.03902e+06	3.80213e+06	4.66931e+06	3.89407e+06	3.68701e+06	3.65878e+06
pos-5.421_342.21846	342.218	5.421	16,17-epoxy-dha	C22H30O3									255786178	7.10433e+07	2.66297e+08	4.69854e+08	3.12937e+07	2.03699e+08	8.60306e+06	2.417e+07	3.6804e+07	6.47791e+07	1.75099e+08	1.4186e+08	9.67515e+07	7.02776e+07	4.31628e+07	2.33413e+07	6.43518e+07	7.909e+07	8.01684e+07	8.51257e+07	9.38841e+07	7.25715e+07	7.80396e+07
pos-4.261_248.17697	248.177	4.261	16:4(4z,7z,10z,13z)	C16H24O2									1.01314e+06	318518	214982	392461	146152	1.15004e+06	2.45008e+06	391447	200032	315321	225009	442193	634863	477396	447789	63015.1	213978	229415	269308	181367	218041	175463	113885
pos-5.056_248.17684	248.177	5.056	16:4(4z,7z,10z,13z)	C16H24O2									4.62969e+07	413338	1.89419e+06	523213	1.474e+06	4.46477e+07	2.90625e+07	3.07091e+06	3.19313e+06	3.9794e+06	6.29528e+06	8.75943e+06	5.42594e+06	4.04026e+06	7.28831e+06	759559	5.26225e+06	4915623	5.72756e+06	5.3236e+06	5.08676e+06	4.42493e+06	4.19112e+06
pos-4.674_248.1769	248.177	4.674	16:4(4z,7z,10z,13z)	C16H24O2									4.90755e+06	6.597e+06	3.73482e+06	7.00276e+06	1.11745e+06	1.03868e+07	1.89167e+07	1.39314e+06	6.86161e+06	9.02302e+06	5.80298e+06	4.18619e+06	2.12453e+06	6.11198e+06	1.14678e+07	6.62577e+06	7.33448e+06	6.93479e+06	7.59437e+06	9.57235e+06	9.8865e+06	5.89258e+06	9.43484e+06
pos-5.311_248.17689	248.177	5.311	16:4(4z,7z,10z,13z)	C16H24O2									3.46652e+07	1.82442e+07	1.96656e+07	1.95569e+07	1.50414e+07	4.93846e+07	3.36006e+07	6.31005e+06	1.27297e+07	2.49399e+07	2.29172e+07	2.87268e+07	9.61317e+06	1.07459e+07	1.94779e+07	4.31434e+06	1.79173e+07	1.76761e+07	1.69272e+07	1.84271e+07	1.57019e+07	1.40391e+07	1.38244e+07
pos-6.095_248.1769	248.177	6.095	16:4(4z,7z,10z,13z)	C16H24O2									1.03146e+07	4.41829e+06	5.65748e+06	7.69697e+06	5.57118e+06	9.82182e+06	6.94042e+06	6.25568e+06	3.16839e+06	4.6727e+06	3.95636e+06	5.38108e+06	7.62542e+06	6.06295e+06	5.87347e+06	4.09718e+06	5.01696e+06	5.51432e+06	5.11752e+06	5.43328e+06	5.22938e+06	5.45798e+06	6.12262e+06
pos-6.223_248.17699	248.177	6.223	16:4(4z,7z,10z,13z)	C16H24O2									8.0436e+06	1.03848e+07	1.67198e+07	2.41389e+07	8.44947e+06	1.43552e+07	3.20918e+06	1.6983e+07	8.79992e+06	8.50751e+06	1.17712e+07	1.08397e+07	7.08566e+06	8.6888e+06	6.54944e+06	4.65886e+06	9.33746e+06	9.24683e+06	9.5806e+06	9.27145e+06	7.96286e+06	6.98105e+06	6.86194e+06
pos-5.603_332.23424	332.234	5.603	16-alpha-hydroxypregnenolone	C21H32O3	HMDB0000315	Lipids and lipid-like molecules	Steroids and steroid derivatives	C06390					3.29507e+07	1.30865e+07	1.91669e+07	4.13847e+07	1.33929e+07	7.38499e+07	5.62538e+06	2.31197e+07	2.0624e+07	1.32328e+07	5.32704e+07	3.56437e+07	2.2028e+07	2.04105e+07	7.04755e+06	6.86765e+06	1.62914e+07	1.86546e+07	1.29045e+07	1.68911e+07	1.7597e+07	1.67054e+07	1.71963e+07
pos-5.534_332.23424	332.234	5.534	16-alpha-hydroxypregnenolone	C21H32O3	HMDB0000315	Lipids and lipid-like molecules	Steroids and steroid derivatives	C06390					4.83859e+07	2.36723e+07	2.93739e+07	5.68828e+07	2.19816e+07	1.02289e+08	1.08943e+07	2.63426e+07	2.79599e+07	1.54271e+07	7.69256e+07	5.18928e+07	2.96431e+07	2.64488e+07	1.05831e+07	1.28543e+07	25874279	2.57818e+07	2.62713e+07	2.49605e+07	2.4442e+07	2.59866e+07	2.54485e+07
neg-7.015_332.23477	332.235	7.015	16-alpha-hydroxypregnenolone	C21H32O3	HMDB0000315	Lipids and lipid-like molecules	Steroids and steroid derivatives	C06390					985845	831530	1.2735e+06	1.70277e+06	147018	1.07799e+06	127491	202324	608380	715271	844360	908592	2.18231e+06	1.87244e+06	1.35627e+06	1.3569e+06	1.06743e+06	1.07154e+06	1.07508e+06	1.00927e+06	1.11659e+06	933959	997739
pos-5.252_332.23422	332.234	5.252	16-alpha-hydroxypregnenolone	C21H32O3	HMDB0000315	Lipids and lipid-like molecules	Steroids and steroid derivatives	C06390					1.7733e+07	2.36339e+07	7.86676e+07	1.1802e+08	7.0544e+06	3.865e+07	7.58271e+06	1.30726e+07	2.12802e+07	2.24147e+07	4.83404e+07	3.51577e+07	1.42418e+07	1.0267e+07	7.24388e+06	7.16816e+06	2.1857e+07	2.26464e+07	2.27064e+07	2.15542e+07	2.21727e+07	2.15811e+07	1.95612e+07
neg-0.908_322.05676	322.057	0.908	16-bromo-7e,15e-hexadecadien-5,13-diynoic acid	C16H19BrO2									2.26965e+06	1.49882e+06	990025	1.82112e+06	6.51121e+06	841772	1.85905e+06	2.87717e+06	2.27557e+06	1.10812e+06	1.50375e+06	1.29428e+06	2.22795e+06	1.90262e+06	1.35363e+06	2.00057e+06	1.58509e+06	1.63943e+06	1.02525e+06	1.21063e+06	1.61426e+06	1.40044e+06	1.71322e+06
neg-0.891_334.15015	334.15	0.891	16-bromo-hexadecanoic acid	C16H31BrO2									222635	495370	806396	613252	614980	985246	184704	797175	641883	761872	713065	1.58964e+06	286500	1.00079e+06	1.14145e+06	494654	494408	423550	335805	360265	534592	439806	502114
pos-3.316_374.18027	374.18	3.316	16-dimethylarsinoyl-9z-hexadecenoic acid	C18H35AsO3									3.90929e+06	2.31128e+07	1.62428e+07	1.84464e+07	1.92721e+07	3.95706e+06	3.4697e+06	3.142e+07	2.3385e+07	1.04449e+07	1.27003e+07	5.47857e+06	1.66505e+07	9.11199e+06	2.29917e+07	2.05428e+07	1.21865e+07	1.44056e+07	1.68238e+07	1.39216e+07	1.51334e+07	1.72853e+07	17617673
neg-3.251_374.18003	374.18	3.251	16-dimethylarsinoyl-9z-hexadecenoic acid	C18H35AsO3									3.88313e+06	2.70423e+07	2.00968e+07	1.98697e+07	1.71266e+07	4.76304e+06	1.47099e+07	2.34672e+07	4.28559e+07	6.80856e+07	4.91948e+07	4.10763e+07	2.24888e+07	8.80802e+06	7.61688e+07	4.36079e+07	1.82892e+07	1.99091e+07	1.77608e+07	2.1286e+07	2.1461e+07	2.17166e+07	1.86725e+07
neg-3.189_374.18007	374.18	3.189	16-dimethylarsinoyl-9z-hexadecenoic acid	C18H35AsO3									404989	1.66364e+07	1.5385e+07	1.83035e+07	1.13103e+07	3.15995e+06	1.16725e+07	9.09842e+06	2.72628e+07	2.38316e+07	1.93868e+07	1.26403e+07	8.62677e+06	7.98895e+06	2.3098e+07	1.1989e+07	1.95113e+07	1.58722e+07	1.98036e+07	1.54125e+07	1.49703e+07	1.55131e+07	1.71625e+07
neg-0.916_374.18019	374.18	0.916	16-dimethylarsinoyl-9z-hexadecenoic acid	C18H35AsO3									669070	3.19453e+06	2.89365e+06	2.76034e+06	835436	597379	1.21994e+06	3.30175e+06	4.19861e+06	4.42888e+06	2.10164e+06	1.28769e+06	1.28939e+06	1.23505e+06	3.06954e+06	3.75288e+06	3.00655e+06	2.34695e+06	1.94266e+06	2.22123e+06	2.81179e+06	2.30813e+06	2.82432e+06
neg-3.4_374.18009	374.18	3.4	16-dimethylarsinoyl-9z-hexadecenoic acid	C18H35AsO3									490685	1.29432e+07	9.46411e+06	7.2505e+06	1.93012e+06	673449	1.28431e+07	3.08446e+06	8.20743e+06	2.07277e+07	1.06312e+07	5.1266e+06	8.16568e+06	6.31168e+06	1.23071e+07	1.28845e+07	9.13144e+06	8.43743e+06	7.61309e+06	8.15354e+06	8.03902e+06	8.2822e+06	7.88357e+06
neg-3.339_434.14706	434.147	3.339	16-hydroxy-18-bromo-8e,17e19z-tricosatrien-4,6-diynoic acid	C23H31BrO3									822348	909766	413061	926117	2.02539e+06	802010	1.81673e+06	2.0352e+06	657498	640827	629572	761288	734981	521220	1.15458e+06	1.41119e+06	802249	778030	814860	886545	799555	852100	760834
neg-6.251_533.34771	533.348	6.251	pe(22:2(13z,16z)/0:0)	C27H52NO7P									3.47811e+07	2.63199e+07	4.37276e+06	6.30214e+06	9.41053e+07	1.71059e+07	2.10072e+07	4.05536e+07	3.08077e+07	1.17318e+07	1.83671e+07	1.46144e+07	3.71375e+07	4.02172e+07	3.66545e+07	7.69935e+07	2.29941e+07	2.41159e+07	2.58055e+07	2.56375e+07	2.50584e+07	2.31562e+07	2.38763e+07
neg-7.198_533.3477	533.348	7.198	pe(22:2(13z,16z)/0:0)	C27H52NO7P									3.46679e+06	1.69152e+06	346159	473049	335433	724578	61396.2	410495	295886	768708	75083.3	472974	1.9706e+07	1.29608e+07	1.11879e+07	9.82867e+06	3.86664e+06	3.66558e+06	3.97707e+06	3.80837e+06	3.77775e+06	3.32298e+06	3.27317e+06
pos-5.623_533.27781	533.278	5.623	pe(0:0/20:4;o2)	C25H44NO9P									1.17821e+06	455531	88946.8	441308	1.67743e+06	408431	292235	220286	522901	356181	669429	376368	429269	663621	2.52513e+07	550311	399012	417343	511120	490553	424895	395676	295420
neg-7.358_272.23486	272.235	7.358	16-hydroxyhexadecanoic acid	C16H32O3	HMDB0006294	Lipids and lipid-like molecules	Fatty Acyls	C18218	Metabolism|Metabolism	Lipid metabolism|Global and overview maps	Cutin, suberine and wax biosynthesis|Metabolic pathways	map00073|map01100	9.455e+07	7.75978e+06	1.33482e+07	1.41981e+07	1.5986e+08	2.52826e+07	4.85738e+07	4.8591e+07	2.37985e+07	2.22827e+07	2.33133e+07	1.66101e+07	4.6629e+07	7.1789e+07	5.28285e+07	4.65829e+07	3.12853e+07	3.24886e+07	3.46808e+07	3.26859e+07	3.08736e+07	2.98076e+07	3.095e+07
neg-5.385_529.31642	529.316	5.385	pe(22:4(7z,10z,13z,16z)/0:0)	C27H48NO7P									8.55577e+07	8.08049e+07	3.09915e+07	3.46906e+07	3.13168e+08	9.30204e+07	2.77043e+08	1.29494e+08	353875043	7.8187e+07	1.28418e+08	1.13951e+08	8.38784e+07	9.53714e+07	7.52668e+07	1.1302e+08	9.40939e+07	9.80117e+07	9.58623e+07	9.04321e+07	9.25375e+07	8.16006e+07	8.91092e+07
pos-4.098_366.19305	366.193	4.098	16-methoxytabersonine	C22H26N2O3				C11675	Metabolism|Metabolism	Biosynthesis of other secondary metabolites|Global and overview maps	Indole alkaloid biosynthesis|Biosynthesis of secondary metabolites	map00901|map01110	287713	536548	402773	587170	1.84168e+06	331222	608235	209925	858579	6.14382e+06	661317	289991	192847	3.39659e+06	377631	120359	808438	708522	885505	864382	701054	744739	834606
neg-4.87_360.22944	360.229	4.87	17(s)-hpdha	C22H32O4									6.97874e+07	1.48424e+07	4.66411e+07	8.0132e+07	1.28398e+07	4.32431e+07	9.1881e+06	1.88061e+07	2.10511e+07	1.60537e+07	2.74141e+07	3.65966e+07	9.05863e+06	1.97461e+07	1.60321e+07	8.69001e+06	1.82975e+07	1.80551e+07	1.5136e+07	1.52276e+07	1.64521e+07	1.49254e+07	1.62684e+07
pos-3.52_444.2133	444.213	3.52	17,18-dehydro-clavulone i	C25H32O7									404945	520823	855398	982899	2.22236e+06	192826	1.37054e+06	259507	1.21257e+06	2.5935e+06	257099	773417	230850	1.35844e+06	489970	362006	797919	1.00761e+06	775137	664907	717989	822145	845802
neg-4.927_444.21403	444.214	4.927	17,18-dehydro-clavulone i	C25H32O7									2.20456e+06	1.12889e+06	1.74201e+06	2.01257e+06	402483	2.24514e+06	3.47005e+06	2.02477e+06	1.22766e+06	1.17023e+06	904440	1.41033e+06	2.53612e+07	2.89215e+07	3.7134e+07	2.02557e+07	6.90938e+06	6.64925e+06	6.50701e+06	5.47864e+06	5.10737e+06	5.26881e+06	5.18563e+06
pos-5.191_272.17677	272.177	5.191	17a-estradiol	C18H24O2	HMDB0000429	Lipids and lipid-like molecules	Steroids and steroid derivatives	C02537	Metabolism	Lipid metabolism	Steroid hormone biosynthesis	map00140	1.88846e+06	1.21509e+06	432093	1.00834e+06	488641	6.51377e+06	1.00679e+06	110573	230183	644556	665312	668540	849802	983410	635052	304175	626022	628866	657845	599189	509146	534444	497330
pos-6.577_272.17688	272.177	6.577	17a-estradiol	C18H24O2	HMDB0000429	Lipids and lipid-like molecules	Steroids and steroid derivatives	C02537	Metabolism	Lipid metabolism	Steroid hormone biosynthesis	map00140	1.09772e+06	663437	2.09021e+06	4.24134e+06	1.42059e+06	2.79988e+06	299672	2.46313e+06	1.34687e+06	1.60449e+06	2.50333e+06	1.31992e+06	1.35282e+06	660963	364508	582697	1.03839e+06	1.34332e+06	930235	1.18997e+06	916927	1.18492e+06	1.03859e+06
pos-7.604_272.17684	272.177	7.604	17a-estradiol	C18H24O2	HMDB0000429	Lipids and lipid-like molecules	Steroids and steroid derivatives	C02537	Metabolism	Lipid metabolism	Steroid hormone biosynthesis	map00140	1.51968e+06	757407	1.85374e+06	1.33011e+06	1.06157e+06	669822	1.15215e+06	532688	401144	1.1764e+06	874142	673027	377961	1.18808e+06	1.37693e+06	844504	1.41944e+06	1.38039e+06	911801	1.34633e+06	959006	760664	1.16556e+06
pos-6.107_272.17663	272.177	6.107	17a-estradiol	C18H24O2	HMDB0000429	Lipids and lipid-like molecules	Steroids and steroid derivatives	C02537	Metabolism	Lipid metabolism	Steroid hormone biosynthesis	map00140	2.70259e+06	2.17292e+06	2.62198e+06	4.24523e+06	1.43605e+06	2.97452e+06	283790	1.77131e+06	1.3694e+06	1.52474e+06	1.98909e+06	1.80993e+06	2.11671e+06	2.42829e+06	1509847	1.23198e+06	1.58518e+06	1.64574e+06	1.74156e+06	1.46026e+06	1.9658e+06	1.31102e+06	1.44789e+06
pos-5.742_270.19749	270.197	5.742	17beta-methylestra-1,3,5(10)-trien-3-ol	C19H26O				C15020					3.37163e+06	1.28636e+06	1.33352e+06	2.09421e+06	3.63663e+06	2.92109e+06	1.97372e+06	2.90994e+06	1.27837e+06	2.64615e+06	1.71921e+06	2.73571e+06	4.62353e+06	5.01158e+06	1.9404e+06	7.39508e+06	4.17036e+06	3.9914e+06	4.07772e+06	3.5685e+06	3.1657e+06	2.49032e+06	3.53443e+06
pos-5.198_270.19754	270.198	5.198	17beta-methylestra-1,3,5(10)-trien-3-ol	C19H26O				C15020					1.91424e+06	2.05638e+06	3.60785e+06	7.40576e+06	1.2e+06	5.1215e+06	1.49888e+06	2.16254e+06	1.111e+06	1.39772e+06	2.05446e+06	1.97638e+06	2.19417e+06	3.16184e+06	1.71459e+06	1.3747e+06	1.62205e+06	1.15504e+06	1.92804e+06	986546	1.77231e+06	1.78298e+06	1.97298e+06
pos-4.703_270.19748	270.197	4.703	17beta-methylestra-1,3,5(10)-trien-3-ol	C19H26O				C15020					4.63474e+07	1.19569e+07	9.62122e+06	1.0607e+07	188981	6.20732e+06	1.88693e+07	9.49573e+06	2.10107e+07	1.09906e+07	6.54726e+06	1.13174e+07	2.76347e+07	3.16728e+07	1.17264e+07	3.0236e+07	1.71393e+07	2.32224e+07	2.3159e+07	2.33087e+07	2.51223e+07	1.78641e+07	2.10693e+07
pos-3.325_388.19561	388.196	3.325	17-dimethylarsinoyl-9z-heptadecenoic acid	C19H37AsO3									5.06044e+06	7.27612e+06	2.47041e+07	2.96852e+07	1.29219e+07	6.42312e+06	1.87717e+07	1.77152e+07	2.84428e+07	5.27894e+07	2.42703e+07	1.9351e+07	2.80445e+07	2.93586e+07	3.3392e+07	3.4909e+07	2.9177e+07	2.94672e+07	2.21572e+07	2.26562e+07	2.4466e+07	2.60721e+07	2.58825e+07
pos-3.172_388.19565	388.196	3.172	17-dimethylarsinoyl-9z-heptadecenoic acid	C19H37AsO3									7.21435e+06	1.36901e+07	1.54778e+07	9.20906e+06	5.31063e+06	3.01842e+06	1.48278e+07	1.05217e+07	1.80363e+07	1.30658e+07	1.49315e+07	7.65895e+06	8.81356e+06	9.52344e+06	1.16121e+07	1.57222e+07	1.24667e+07	1.31385e+07	9.93781e+06	1.26588e+07	9.71911e+06	1.24002e+07	1.42009e+07
neg-3.377_388.19588	388.196	3.377	17-dimethylarsinoyl-9z-heptadecenoic acid	C19H37AsO3									1.77109e+06	1.32986e+07	1.19064e+07	6.86808e+06	6.6646e+06	1.19427e+06	1.00182e+07	6.4068e+06	1.91201e+07	1.81973e+07	1.22124e+07	7.2722e+06	1.04036e+07	6.15235e+06	7.71529e+06	1.69828e+07	1.06872e+07	1.09688e+07	14998590	1.04031e+07	1.03271e+07	1.56303e+07	1.14515e+07
neg-3.294_388.19588	388.196	3.294	17-dimethylarsinoyl-9z-heptadecenoic acid	C19H37AsO3									2.78993e+06	2.18591e+07	2.51337e+07	8.74163e+06	8.27085e+06	1.89988e+06	1.55947e+07	1.64139e+07	1.58021e+07	2.16821e+07	14414044	1.05502e+07	1.14238e+07	7.28019e+06	2.46907e+07	2.26607e+07	1.30108e+07	1.12445e+07	1.36736e+07	1.2759e+07	1.37891e+07	1.60068e+07	1.18512e+07
pos-0.931_388.19444	388.194	0.931	17-dimethylarsinoyl-9z-heptadecenoic acid	C19H37AsO3									3.27138e+06	1.22136e+07	5.70307e+06	8.3589e+06	3.07229e+06	2.99102e+06	2.62447e+06	6.04817e+06	1.11005e+07	1.86257e+07	1.51548e+07	7.25062e+06	5.32423e+06	1.27569e+07	1.69536e+07	1.06746e+07	7.59058e+06	6.88845e+06	8500066	7.90115e+06	7.96091e+06	5.90536e+06	3.90094e+06
neg-0.941_388.19569	388.196	0.941	17-dimethylarsinoyl-9z-heptadecenoic acid	C19H37AsO3									509799	1.4638e+06	1.84629e+06	1.37586e+06	766657	502230	345455	802811	2.25973e+06	3.16992e+06	1.14569e+06	281631	339530	353998	1.47819e+06	2.12046e+06	997084	1.10301e+06	1.07153e+06	970413	1.01885e+06	764322	1.62968e+06
neg-3.165_388.19586	388.196	3.165	17-dimethylarsinoyl-9z-heptadecenoic acid	C19H37AsO3									622518	1.77388e+07	1.12448e+07	1.18884e+07	3.24037e+06	965887	6.35148e+06	4.45627e+06	1.86859e+07	2.39873e+07	1.11722e+07	3.91159e+06	6.0273e+06	5.12344e+06	1.05991e+07	1.54475e+07	1.04451e+07	1.04411e+07	9.98236e+06	1.08237e+07	1.04656e+07	1.06658e+07	1.21713e+07
neg-4.266_468.27131	468.271	4.266	17-hydroxyandrostane-3-glucuronide	C25H40O8	HMDB0010359	Lipids and lipid-like molecules	Steroids and steroid derivatives						102442	482663	352893	499141	78026.4	163922	268010	1.08792e+06	290794	441970	740459	835987	419132	431635	2.18332e+06	295239	493888	443899	656224	508409	509849	471414	576341
pos-0.884_332.17984	332.18	0.884	17-oxo dexamethasone	C20H25FO3									5.95338e+06	1.54589e+06	1.4675e+06	3.23219e+06	7.46448e+06	5.46237e+06	4.19578e+06	1.33023e+07	2.82882e+06	4.37946e+06	4.83587e+06	3.20243e+06	3.64083e+06	2.65732e+06	2.28855e+06	3.74674e+06	2.32043e+06	2.88341e+06	1.89837e+06	1.52176e+06	2.51276e+06	3.3484e+06	1.99316e+06
pos-3.298_332.17809	332.178	3.298	17-oxo dexamethasone	C20H25FO3									934965	1.00161e+07	1.96339e+06	1.55779e+06	802438	842649	1.59944e+06	456077	747017	3.82766e+06	1.13519e+06	748179	1.32868e+06	1.86289e+06	1.13447e+06	725827	1.35808e+06	1.61582e+06	1.38936e+06	1.51658e+06	1.39634e+06	1.4692e+06	1.70593e+06
pos-1.365_386.20873	386.209	1.365	17-phenyl-trinor-pge2	C23H30O5									1.0959e+06	1.72833e+06	1.56986e+06	1.1998e+06	1.13995e+06	1.13471e+06	1.27475e+06	622183	934236	2.02503e+06	379007	1.03614e+06	700793	509359	748631	937535	792455	603250	644841	738281	861291	367105	1.03577e+06
neg-4.113_337.19219	337.192	4.113	18-(methoxycarbonyl)-3,4-didehydroibogamin-6-ium	C15H31NO5S									6.80005e+06	826292	445807	2.36613e+06	763899	2.09972e+06	4.64724e+06	1.83456e+06	1.96002e+06	1.00283e+06	8.95813e+06	1.1283e+06	6.34225e+06	5.58462e+06	8.24924e+06	9.24571e+06	3.54787e+06	3.52983e+06	3.83964e+06	3.42632e+06	3.31124e+06	3.77997e+06	3.48519e+06
neg-4.58_337.19206	337.192	4.58	18-(methoxycarbonyl)-3,4-didehydroibogamin-6-ium	C16H35NS3									640807	440971	407830	27914.9	43724.8	53947.1	58524.6	50729.1	108491	19283	93154.4	23645.9	1.37318e+06	596876	8.44583e+06	4.29773e+06	1.97955e+06	1.78756e+06	2.47548e+06	2.02931e+06	1.93909e+06	1.84647e+06	2.42464e+06
neg-5.109_337.19204	337.192	5.109	18-(methoxycarbonyl)-3,4-didehydroibogamin-6-ium	C15H31NO5S									4.417e+07	3.18033e+06	1.88237e+06	1.73555e+07	2.83252e+06	491648	4.8109e+06	1.01378e+06	1.8084e+07	1.04545e+07	3.68425e+06	1.25546e+07	1.31947e+07	1.13924e+07	5.70748e+07	4.78246e+07	5.13862e+07	7.26044e+07	6.55987e+07	7.2947e+07	7.27046e+07	7.71799e+07	6.90341e+07
neg-4.632_337.19207	337.192	4.632	18-(methoxycarbonyl)-3,4-didehydroibogamin-6-ium	C15H31NO5S									1.77228e+06	1.19658e+06	1.78003e+06	95012	60499.6	255193	162941	132930	673584	863915	129077	104418	5.54583e+06	4.54899e+06	1.80283e+07	4.29773e+06	6.19407e+06	5.91543e+06	6.73663e+06	6.49731e+06	6.30657e+06	7.23523e+06	8.75899e+06
neg-3.269_350.08776	350.088	3.269	18-bromo-9e,17e-octadecadiene-7,15-diynoic acid	C18H23BrO2									5.5041e+06	538816	678222	909071	600010	649282	551813	619323	1.93315e+06	1.41011e+06	2.78139e+06	1.36723e+06	592348	1.08429e+06	1.15369e+06	763643	726580	849682	965187	953084	890253	977448	1.05883e+06
neg-7.351_298.23125	298.231	7.351	18-fluoro-9z,12z-octadecadienoic acid	C18H31FO2									893217	88731.7	171995	177798	1.91401e+06	264263	379036	480073	213223	288530	211252	128546	590866	822123	706628	569633	305912	278702	252791	273173	318587	343711	345521
pos-6.027_320.23428	320.234	6.027	18-hete	C20H32O3	HMDB0006245	Lipids and lipid-like molecules	Fatty Acyls						2.79763e+07	1.62927e+07	2.8528e+07	3.38664e+07	6.56839e+06	3.69875e+07	1.66321e+07	9.35936e+06	1.04036e+07	2.22076e+07	1.78302e+07	1.72728e+07	6.59476e+06	4.79899e+06	4.36106e+06	2.59624e+06	1.17811e+07	1.23553e+07	1.24723e+07	1.27995e+07	1.25307e+07	1.1718e+07	1.1034e+07
pos-7.238_302.22359	302.224	7.238	19(r)-hete	C20H32O3									2.09298e+08	8.19852e+07	1.62396e+08	1.29585e+08	8.45755e+07	7.9402e+07	9.05531e+07	3.89476e+07	4.03932e+07	9.69239e+07	6.72878e+07	4.11199e+07	1.0573e+08	2.05002e+08	2.41524e+08	1.12663e+08	1.73624e+08	1.75009e+08	1.57863e+08	155247890	1.23393e+08	1.03179e+08	1.10204e+08
neg-5.217_332.19848	332.198	5.217	19(r)-hydroxy prostaglandin a2	C20H30O5									1.03778e+07	664035	936435	3.68024e+06	594547	2.03806e+07	1.24099e+07	237126	914869	2.26571e+06	2.79791e+06	2.35585e+06	2.30979e+06	2.74754e+06	3.16231e+06	542942	2.2445e+06	1.76134e+06	2.16712e+06	2.33356e+06	2.61445e+06	2.47937e+06	2.65138e+06
neg-4.293_370.23515	370.235	4.293	19(r)-hydroxy prostaglandin f2伪	C20H34O6									3.7948e+07	1.76186e+07	4.59996e+07	1.22124e+08	3.3809e+07	6.14358e+07	3.23725e+07	3.78786e+07	4.62902e+07	3.24952e+07	7.21904e+07	6.04293e+07	1.6227e+07	2.08775e+07	5.07332e+06	2.46788e+07	3.29975e+07	2.63452e+07	2.41736e+07	3.04131e+07	2.43283e+07	2.81584e+07	3.35845e+07
neg-3.366_418.24283	418.243	3.366	19-dimethylarsinoyl-nonadecanoic acid	C21H43AsO3									678389	9.47725e+06	6.23036e+06	4.02948e+06	6.7962e+06	914491	4.77907e+06	6.52882e+06	6.85794e+06	9.90281e+06	6.54678e+06	4.21444e+06	4.40794e+06	3.55838e+06	4.76048e+06	6.48509e+06	5.73156e+06	4.87954e+06	5.42121e+06	5.30437e+06	7.16717e+06	7.30125e+06	6.87456e+06
neg-3.258_418.24278	418.243	3.258	19-dimethylarsinoyl-nonadecanoic acid	C21H43AsO3									31169.4	780871	543669	442052	146251	72618.1	301801	200953	775461	1.92542e+06	587498	285609	322383	304618	680161	665390	370126	430897	457885	459768	462070	493794	460796
neg-3.475_418.24286	418.243	3.475	19-dimethylarsinoyl-nonadecanoic acid	C21H43AsO3									140130	3.50683e+06	4.14182e+06	2.84261e+06	1.21461e+06	111335	1.28778e+06	1.08429e+06	1.79852e+06	3.46584e+06	1.4362e+06	1.41347e+06	1.14375e+06	1.36984e+06	1.55591e+06	3.01672e+06	1.55169e+06	2.35869e+06	1.78147e+06	1.73364e+06	1.78379e+06	2.34235e+06	1.59337e+06
pos-3.44_418.24277	418.243	3.44	19-dimethylarsinoyl-nonadecanoic acid	C21H43AsO3									341864	7.76875e+06	9.05548e+06	3.94349e+06	1.05188e+06	205145	1.4811e+06	1.63702e+06	2.46124e+06	5.2227e+06	2.18502e+06	2.22217e+06	1.72114e+06	3.33488e+06	2.33574e+06	3.30045e+06	3.36522e+06	3.32765e+06	3.78369e+06	2.92128e+06	3.34935e+06	2.65503e+06	2.78201e+06
pos-3.478_300.17396	300.174	3.478	19-oxoandrost-4-ene-3_17-dione	C19H24O3									606222	5.37638e+06	8.1003e+06	1.56264e+06	588035	513641	3.47501e+06	791609	1.69287e+06	4.0484e+06	802010	764365	991940	608748	1.65025e+06	5.90038e+06	2.37635e+06	2.49552e+06	2.91218e+06	2.74488e+06	2.04656e+06	2.89074e+06	1.68196e+06
pos-5.099_414.20306	414.203	5.099	19-oxodesacetylcinobufagin	C24H30O6									6.67891e+07	1.0225e+07	3.53553e+07	2.55758e+07	4.20768e+07	3.44667e+07	3.0865e+07	1.57407e+07	4.18911e+06	1.61943e+07	5.64597e+07	2.65656e+07	3.35709e+07	2.22248e+07	2.38469e+07	1.0438e+07	2.32273e+07	22693298	2.23285e+07	2.10595e+07	1.91702e+07	1.38534e+07	1.06915e+07
neg-4.267_372.251	372.251	4.267	19r-hydroxy-pgf1alpha	C20H36O6									2.32604e+06	1.24497e+06	6.53219e+06	2.19319e+07	579675	5.4192e+06	1.18171e+06	1.87046e+06	1.13239e+06	773260	2.53422e+06	2.00771e+06	227096	1.42993e+06	436648	881982	1.74371e+06	1.38484e+06	1.47551e+06	1.44078e+06	1.47092e+06	1.62555e+06	1.4234e+06
neg-4.891_382.27145	382.271	4.891	1a,1b-dihomo prostaglandin f2伪	C22H38O5									2.10654e+07	1.2184e+07	3.99041e+07	5.73331e+07	1.71293e+07	2.88903e+07	2.18755e+07	6.14121e+07	1.53507e+07	8.01969e+06	2.8542e+07	1.86861e+07	4.51328e+06	1.09306e+07	5.55165e+06	9.20639e+06	1.5306e+07	1.46327e+07	2.12127e+07	2.14054e+07	1.10923e+07	1.25597e+07	1.16621e+07
neg-5.904_364.26105	364.261	5.904	1a,1b-dihomo prostaglandin f2伪	C22H38O5									5.50236e+06	5.04172e+06	1.79325e+07	26408999	2.81598e+06	6.54283e+06	915654	7.55696e+06	3.59116e+06	2.47045e+06	6.43437e+06	5.4565e+06	1.98453e+06	3.59035e+06	1.73561e+06	197630	3.16974e+06	4.61749e+06	3.43921e+06	3.08267e+06	3.72148e+06	3.10141e+06	3.43404e+06
neg-7.572_540.35943	540.359	7.572	1alpha,25-dihydroxy-25,25-diphenyl-26,27-dinorvitamin d3 / 1alpha,25-dihydroxy-25,25-diphenyl-26,27-dinorcholecalciferol	C37H48O3									1.31274e+07	7.80007e+06	2.97211e+06	1.77662e+06	9.36398e+06	7.39309e+06	3.68294e+06	3.81849e+06	1.81129e+06	2.77363e+06	2.21396e+06	3.46555e+06	5.55701e+06	2.57341e+06	2.02737e+06	2.45576e+06	2.6436e+06	2.62445e+06	2.5066e+06	2.55996e+06	2.91748e+06	2.59037e+06	2.82071e+06
pos-5.931_388.29665	388.297	5.931	1alpha-hydroxy-21-nor-20-oxavitamin d3 / 1alpha-hydroxy-21-nor-20-oxacholecalciferol	C25H40O3									1.05561e+06	753177	395406	669075	2.31949e+06	1.30234e+06	1.22196e+06	3.69415e+06	1.32358e+06	320509	683191	736302	542240	681720	546970	647444	748695	679901	559016	620828	579099	478919	476844
pos-6.718_388.29643	388.296	6.718	1alpha-hydroxy-21-nor-20-oxavitamin d3 / 1alpha-hydroxy-21-nor-20-oxacholecalciferol	C25H40O3									1.86757e+06	449981	394735	456933	1.44537e+06	1.37591e+06	2.90319e+06	1.11608e+06	3.04246e+06	602079	946465	780319	779463	729826	554229	724346	1.13548e+06	1.09722e+06	995653	950437	734837	481369	586969
pos-3.675_436.26549	436.265	3.675	1alpha-hydroxy-24-methylsulfonyl-25,26,27-trinorvitamin d3 / 1alpha-hydroxy-24-methylsulfonyl-25,26,27-trinorcholecalciferol	C25H40O4S									1.21005e+06	2.30266e+06	2.05512e+06	2.16781e+06	1.13278e+06	917788	3.25122e+06	2.00901e+06	2.61977e+06	2.19611e+06	1.74497e+06	2.18687e+06	1.00378e+06	2.41222e+06	1.87145e+06	2.10826e+06	3.14742e+06	2.33918e+06	2.20892e+06	2.12586e+06	2.22346e+06	2.15007e+06	2.24236e+06
pos-0.84_259.04482	259.045	0.84	1-amino-1-deoxy-scyllo-inositol4-phosphate	C6H14NO8P									4.13333e+06	3.12441e+06	6.93986e+06	7.37416e+06	4.69494e+06	5.36592e+06	2.84834e+06	3.44064e+06	2.30151e+06	3.05639e+06	3.56925e+06	5.55188e+06	4.16391e+06	3.89608e+06	4.07834e+06	3.40975e+06	3.24933e+06	3.69967e+06	3.37125e+06	3.16577e+06	3.59508e+06	2.79228e+06	2.6354e+06
neg-0.833_259.04528	259.045	0.833	1-amino-1-deoxy-scyllo-inositol4-phosphate	C6H14NO8P									2.91085e+07	2.0349e+07	7.08176e+07	6.75453e+07	1.40188e+07	8.19639e+06	1.84169e+07	7.39223e+06	1.30818e+07	2.46296e+07	2.27676e+07	2.64881e+07	8.89721e+06	2.20377e+07	2.95849e+07	7.9447e+07	1.67158e+07	1.71027e+07	1.78499e+07	1.85882e+07	1.70006e+07	1.69887e+07	1.8477e+07
neg-4.185_378.88291	378.883	4.185	1-amino-2,4-dibromoanthraquinone	C14H7Br2NO2				C19211					91924.8	414169	65174.1	63105.5	265538	424800	948591	501813	52164.7	30590.5	25046	35280.5	302755	458912	1.30812e+06	368228	401131	495047	360311	372585	303467	329348	312874
pos-1.364_101.04748	101.047	1.364	1-aminocyclopropane-1-carboxylate	C4H7NO2	HMDB0036458	Organic acids and derivatives	Carboxylic acids and derivatives	C01234	Metabolism|Metabolism|Metabolism|Metabolism|Metabolism	Amino acid metabolism|Chemical structure transformation maps|Chemical structure transformation maps|Global and overview maps|Global and overview maps	Cysteine and methionine metabolism|Biosynthesis of plant secondary metabolites|Biosynthesis of plant hormones|Metabolic pathways|Biosynthesis of secondary metabolites	map00270|map01060|map01070|map01100|map01110	5.63751e+07	3.64415e+07	4.55769e+07	4.16022e+07	1.13975e+08	9.48364e+07	9.5051e+07	8.7319e+07	4.64434e+07	4.51581e+07	5.00543e+07	5.39915e+07	4.2812e+07	4.70515e+07	3.89976e+07	5.01624e+07	3.10798e+07	4.28097e+07	2.93349e+07	4.11546e+07	4.30756e+07	5.62717e+07	4.828e+07
pos-0.829_101.04748	101.047	0.829	1-aminocyclopropane-1-carboxylate	C4H7NO2	HMDB0036458	Organic acids and derivatives	Carboxylic acids and derivatives	C01234	Metabolism|Metabolism|Metabolism|Metabolism|Metabolism	Amino acid metabolism|Chemical structure transformation maps|Chemical structure transformation maps|Global and overview maps|Global and overview maps	Cysteine and methionine metabolism|Biosynthesis of plant secondary metabolites|Biosynthesis of plant hormones|Metabolic pathways|Biosynthesis of secondary metabolites	map00270|map01060|map01070|map01100|map01110	3.91518e+08	2.63616e+08	1.65357e+08	2.51787e+08	3.8659e+08	3.02617e+08	2.01517e+08	3.45556e+08	2.81065e+08	2.4432e+08	3.05405e+08	3.16251e+08	4.47767e+08	2.68371e+08	3.31442e+08	2.99237e+08	1.96549e+08	1.94065e+08	1.9123e+08	1.95228e+08	215759712	2.19073e+08	2.02621e+08
neg-0.837_274.04497	274.045	0.837	1-deoxy-d-altro-heptulose7-phosphate	C7H15O9P									4.51219e+07	3.73541e+07	1.65544e+08	1.6321e+08	1.40252e+07	1.06828e+07	8.27047e+06	9.25108e+06	3.66526e+07	4.08874e+07	3.78285e+07	5.23313e+07	1.33778e+07	51824974	4.04196e+07	1.62811e+07	4.09883e+07	3.72097e+07	3.36671e+07	3.6249e+07	3.45175e+07	3.42059e+07	3.48576e+07
pos-3.664_404.20569	404.206	3.664	1-dimethylarsinoyl-(2z,5z, 8z,11z,14z,17z)-heneicosahexaene	C23H37AsO									382400	855692	1.02874e+06	365580	559512	99217.8	640584	280896	534020	1.71218e+06	587060	348876	656371	379239	3.64271e+06	1.01164e+06	550777	577713	608682	497211	392613	513687	528855
pos-3.505_418.22237	418.222	3.505	1-dimethylarsinoyl-(3z,6z,9z,12z,15z,18z)-docosahexaene	C24H39AsO									492125	2.84615e+06	2.27748e+06	1.41191e+06	1.58307e+06	402928	8.41719e+06	1.26325e+06	8.00451e+06	3.3166e+06	2.31935e+06	1.42548e+06	693745	657154	2.89491e+06	5.53607e+06	2.28217e+06	2.10245e+06	2.26418e+06	1.86864e+06	1.85413e+06	1.89982e+06	2.37528e+06
neg-3.583_418.22303	418.223	3.583	1-dimethylarsinoyl-(3z,6z,9z,12z,15z,18z)-docosahexaene	C24H39AsO									778337	6.23021e+06	5.03255e+06	3.58015e+06	2.25866e+06	356427	5.43011e+06	4.02301e+06	9.36014e+06	4.88266e+06	3.30676e+06	2.51715e+06	1.96007e+06	2.04649e+06	8.46739e+06	9.35106e+06	4.32685e+06	4.22398e+06	3.66442e+06	3.34205e+06	4.56255e+06	4.01042e+06	4.28541e+06
pos-3.575_418.22261	418.223	3.575	1-dimethylarsinoyl-(3z,6z,9z,12z,15z,18z)-docosahexaene	C24H39AsO									1.39462e+06	1.26275e+07	6.79132e+06	6.74172e+06	7.43466e+06	1.4644e+06	7.30237e+06	4.84317e+06	7.17316e+06	2.30083e+07	5.9059e+06	7.56291e+06	5.9481e+06	7.23361e+06	1.17985e+07	6.86471e+06	6.79246e+06	5.12787e+06	5.12787e+06	6.299e+06	6.65922e+06	6.99116e+06	8.45617e+06
neg-3.831_418.22038	418.22	3.831	1-dimethylarsinoyl-(3z,6z,9z,12z,15z,18z)-docosahexaene	C24H39AsO									961126	412885	781259	6.63826e+06	919234	2.48109e+06	189587	1.22473e+06	454325	324939	1.46097e+06	1.33191e+06	443837	1.18576e+06	758525	290193	737887	908079	690253	964309	854142	937043	762601
pos-0.898_360.23629	360.236	0.898	1-dimethylarsinoyl-heptadecane	C19H41AsO									8.35895e+06	1.54827e+07	1.30053e+07	8.85382e+06	1.06524e+07	9.65947e+06	8.61057e+06	6.17991e+06	1.24677e+07	1.84926e+07	1.1351e+07	9.99436e+06	8.94928e+06	5.25761e+06	1.05097e+07	1.27302e+07	8.27808e+06	9.39897e+06	7.04431e+06	8.08375e+06	9.58287e+06	1.07291e+07	1.0637e+07
pos-1.401_360.23674	360.237	1.401	1-dimethylarsinoyl-heptadecane	C19H41AsO									2.13296e+06	4.48413e+06	2.75027e+06	991323	819649	2.31108e+06	1.3278e+06	1.07928e+06	2.47127e+06	3.34307e+06	1.9157e+06	1.04797e+06	1.52899e+06	946673	1.04511e+06	2.60141e+06	1.94131e+06	1.97617e+06	1.29064e+06	1.56796e+06	1.66981e+06	1.76095e+06	2.13575e+06
pos-1.549_360.23651	360.237	1.549	1-dimethylarsinoyl-heptadecane	C19H41AsO									262363	2.07383e+06	2.86527e+06	1.60723e+06	629570	349226	1.35956e+06	966530	1.7841e+06	1.73528e+06	1.45326e+06	1.20124e+06	1.03624e+06	952822	2.12198e+06	1.87647e+06	1.19573e+06	1.55999e+06	1.24476e+06	1.3564e+06	1.31376e+06	1.93361e+06	1.69903e+06
pos-3.216_374.25246	374.252	3.216	1-dimethylarsinoyl-octadecane	C20H43AsO									1.76588e+06	4.06693e+06	1.24313e+07	1.18368e+07	4.29081e+06	4.05126e+06	1.24431e+07	1.10167e+07	1.13543e+07	1.97014e+07	8.3927e+06	9.75453e+06	9.00112e+06	7.55651e+06	8.38985e+06	1.26528e+07	7.93141e+06	1.16765e+07	9.32165e+06	9.59039e+06	1.04505e+07	1.03962e+07	1.11694e+07
pos-0.896_374.25176	374.252	0.896	1-dimethylarsinoyl-octadecane	C20H43AsO									9.23993e+06	5.50424e+06	1.02245e+07	6.56908e+06	9.84746e+06	7.76816e+06	2.97256e+06	5.09e+06	6.4323e+06	1.38381e+07	4.88966e+06	4.94238e+06	6.30258e+06	4.62893e+06	3.31231e+06	2.71609e+06	4.52625e+06	4.01035e+06	4.42888e+06	4.576e+06	5.39772e+06	4.43286e+06	4.65016e+06
neg-5.489_529.31638	529.316	5.489	pe(22:4(7z,10z,13z,16z)/0:0)	C27H48NO7P									1.61561e+08	5.61447e+07	2.63504e+07	3.43434e+07	4.04669e+08	1.32456e+08	3.09692e+08	1.64879e+08	283325291	5.26921e+07	1.31229e+08	1.06971e+08	1.32274e+08	1.07248e+08	6.11945e+07	1.08215e+08	7.72754e+07	8.4797e+07	8.37271e+07	8.61158e+07	8.07545e+07	7.78757e+07	8.23307e+07
neg-5.935_529.31615	529.316	5.935	pe(22:4(7z,10z,13z,16z)/0:0)	C27H48NO7P									6.59934e+06	6.87425e+06	5.19729e+06	5.78664e+06	2.44716e+07	1.05113e+07	1.25727e+07	1.58981e+07	7.55533e+06	4.26483e+06	6.07505e+06	7.59465e+06	4.90753e+06	5.16413e+06	4.21703e+06	5.17207e+06	4844979	4.74807e+06	4.54701e+06	4.93637e+06	6.60417e+06	4.94207e+06	4.17937e+06
pos-0.845_260.0289	260.029	0.845	1d-myo-inositol3-phosphate	C6H13O9P									3.38647e+07	1.48002e+07	1.1882e+07	1.68201e+07	5.72742e+07	6.77844e+07	2.12538e+07	2.68503e+07	2.22652e+07	1.59282e+07	2.01823e+07	3.75148e+07	4.69644e+07	4.02738e+07	2.11679e+07	1.10917e+07	2.25089e+07	2.19827e+07	2.08352e+07	1.99013e+07	2.00129e+07	1.822e+07	2.06362e+07
neg-4.488_432.2718	432.272	4.488	1-epidactimicin	C18H36N6O6				C17980					4.99865e+06	2.71501e+06	344235	5.29805e+06	1.18359e+06	2.03559e+06	1.86952e+06	501095	5.4846e+06	2.48917e+06	1.33733e+07	1.55717e+06	8.33646e+06	7.84394e+06	9.02245e+06	8.00953e+06	5.03876e+06	6.00817e+06	4.26324e+06	4.16623e+06	4.64743e+06	4.47162e+06	5.18182e+06
neg-0.882_504.16858	504.169	0.882	1f-beta-d-fructosylsucrose	C18H32O16	HMDB0011729	Organic oxygen compounds	Organooxygen compounds	C03661					2.10106e+07	5.35961e+08	3.45488e+08	2.29915e+08	1956027171	2138584356	1.668e+08	8.48711e+08	1.73745e+08	1.12056e+08	6.0122e+07	2.90248e+08	4.8606e+07	1.58153e+08	1.43496e+08	4.76777e+07	2.95647e+08	2.78269e+08	2.76949e+08	2.67693e+08	267639595	2.64933e+08	2.89977e+08
neg-1.353_504.16868	504.169	1.353	1f-beta-d-fructosylsucrose	C18H32O16	HMDB0011729	Organic oxygen compounds	Organooxygen compounds	C03661					540032	735860	1.47908e+06	2.05764e+06	1.25292e+06	1.20221e+06	335787	1.52111e+06	919517	3.05006e+06	1.21441e+06	1.17273e+06	340302	543429	988837	331559	805016	888831	746181	747806	1.09788e+06	756891	732209
pos-4.296_132.06841	132.068	4.296	1h-indol-3-amine	C8H8N2									7.24181e+06	1.82764e+06	2.21721e+06	2.51506e+06	9.29437e+06	6.54532e+06	3.83312e+06	4.00649e+06	2.16315e+06	2.05898e+06	2.0138e+06	3.08382e+06	3.90908e+06	2.91558e+06	2.42915e+06	1.74452e+06	2.13278e+06	1.96941e+06	2.25456e+06	2.16937e+06	2.07283e+06	2.21234e+06	2.06444e+06
neg-4.313_402.09461	402.095	4.313	1-hydroxy-2-(beta-d-glucosyloxy)-9_10-anthraquinone	C20H18O9									3.3577e+07	1.13509e+07	1.15158e+07	1.58015e+07	4.86624e+07	32767690	2.38085e+07	2.48667e+07	1.24771e+07	1.19652e+07	1.56781e+07	2.28538e+07	2.07488e+07	1.34599e+07	9.12033e+06	1.18079e+07	1.15887e+07	1.14248e+07	1.16968e+07	1.27066e+07	1.08402e+07	1.26251e+07	1.1804e+07
neg-6.062_529.31615	529.316	6.062	pe(22:4(7z,10z,13z,16z)/0:0)	C27H48NO7P									2.47012e+07	2.16179e+07	4.97614e+06	8.38785e+06	4.88692e+07	2.31878e+07	2.02699e+07	2.05346e+07	1.45586e+07	1.38847e+07	2.34725e+07	2.52173e+07	2.26565e+07	1.13014e+07	1.08764e+07	1.22984e+07	1.01258e+07	9.42689e+06	9.70575e+06	9.77747e+06	1.02502e+07	9.75333e+06	9.7314e+06
pos-3.959_194.07265	194.073	3.959	1-hydroxyphenanthrene	C14H10O	HMDB0059797	Benzenoids	Phenanthrenes and derivatives	C11432	Metabolism|Metabolism	Xenobiotics biodegradation and metabolism|Global and overview maps	Polycyclic aromatic hydrocarbon degradation|Microbial metabolism in diverse environments	map00624|map01120	447368	914525	140439	173588	902719	2.31809e+06	8.72525e+06	3.11667e+06	186113	162561	231013	296223	352626	328933	463559	197043	473038	425915	493839	394895	424254	472461	565158
pos-1.522_296.10025	296.1	1.522	1-iodo-2-methylundecane	C12H25I	HMDB0062727	Organohalogen compounds	Organoiodides						3.37921e+06	1.83386e+06	2.28602e+06	2.17584e+06	1.63518e+07	5.997e+06	6.88437e+06	2.02513e+07	2.65206e+06	2.95854e+06	2.73651e+06	4.13762e+06	3.02821e+06	2.69462e+06	4.19672e+06	4.9982e+06	3.3645e+06	3.06656e+06	3.46291e+06	3.71599e+06	3.48289e+06	3.61797e+06	3.71082e+06
neg-1.515_296.10045	296.1	1.515	1-iodo-2-methylundecane	C12H25I	HMDB0062727	Organohalogen compounds	Organoiodides						600175	996547	1.44896e+06	916300	5.09486e+06	1.19116e+06	2.08566e+06	7.64956e+06	1.46873e+06	1.71367e+06	1.39535e+06	1.51247e+06	793568	611061	2.04536e+06	2.6963e+06	1.23147e+06	1.12739e+06	1.18855e+06	1.18534e+06	1.31052e+06	1.66472e+06	1.70374e+06
pos-5.411_177.06071	177.061	5.411	1-isothiocyanato-3-phenylpropane	C10H11NS	HMDB0038444	Benzenoids	Benzene and substituted derivatives						5.10779e+06	4.48572e+06	3.97059e+06	243972	3.13577e+08	2.92612e+08	177333560	1.52667e+08	395968	205130	427198	486190	1.78117e+07	1.08123e+07	1.4589e+07	1.05313e+07	2.02829e+07	1.93884e+07	2.14365e+07	2.03866e+07	2.05208e+07	1.97882e+07	1.93012e+07
pos-5.364_519.331	519.331	5.364	1-linoleoylglycerophosphocholine	C26H50NO7P	HMDB0010386	Lipids and lipid-like molecules	Glycerophospholipids						1354622143	1385460596	164333545	1.83122e+08	1185153201	7.06587e+08	1208170328	5.50162e+08	2054876674	2.93804e+08	5.02662e+08	5.34061e+08	410964787	4.86212e+08	330821242	5.45456e+08	5.79006e+08	5.52703e+08	5.77656e+08	6.25986e+08	5.88195e+08	5.45211e+08	5.5073e+08
pos-5.485_519.33101	519.331	5.485	1-linoleoylglycerophosphocholine	C26H50NO7P	HMDB0010386	Lipids and lipid-like molecules	Glycerophospholipids						3083454808	3300874934	4.55211e+08	1033395160	3242296113	1804932901	1637457199	2141990381	2426296911	865946018	1977632516	2003211644	1276768733	2161030064	1402937438	2229842176	1703178036	1622143514	1483461290	1410647305	1463477180	1420240990	1355939987
pos-5.34_186.07867	186.079	5.34	1-methoxy-1h-indole-3-acetonitrile	C11H10N2O	HMDB0040973	Organoheterocyclic compounds	Indoles and derivatives						1.08077e+06	473711	491347	522778	1.80102e+08	1.67073e+08	9.97873e+07	1.04399e+08	444949	434075	757311	705556	8.94696e+06	6.20564e+06	5.88044e+06	3.83481e+06	1.10362e+07	1.14474e+07	1.08137e+07	1.23778e+07	1.18231e+07	1.13392e+07	1.17323e+07
pos-5.175_529.31556	529.316	5.175	pe(22:4(7z,10z,13z,16z)/0:0)	C27H48NO7P									2.75759e+06	1.08272e+06	360263	582071	1.05003e+06	603105	1.00794e+06	867837	1.19476e+06	408329	2.51139e+06	899856	2.31752e+06	2.80859e+06	2.01851e+06	2.91809e+06	1.0835e+06	1.22387e+06	1.01582e+06	1.07296e+06	1.32536e+06	1.18026e+06	1.49417e+06
neg-3.621_359.15153	359.152	3.621	1-methyl-8-methylenegibbane-1,4a,10-tricarboxylate	C15H27N3O3P2									135802	296174	395233	691539	664199	409389	942687	1.93836e+06	699642	964969	828786	350085	514127	482867	252882	661547	584935	574737	569345	489351	528838	531143	571899
pos-0.895_149.06969	149.07	0.895	1-methyladenine	C6H7N5	HMDB0011599	Organoheterocyclic compounds	Imidazopyrimidines	C02216					1.39691e+07	7.30932e+06	7.37676e+06	8.9189e+06	1.40842e+07	1.01267e+07	8.00208e+06	8.8549e+06	6.68999e+06	5.80487e+06	6.82964e+06	5.29294e+06	8.2843e+06	6.8294e+06	5.85008e+06	7.77488e+06	6.13028e+06	6.24071e+06	5.20321e+06	5.35354e+06	6.62542e+06	6.58662e+06	6.36567e+06
pos-1.553_165.06463	165.065	1.553	1-methylguanine	C6H7N5O	HMDB0003282	Organoheterocyclic compounds	Imidazopyrimidines	C04152					3.86127e+06	877509	7.93278e+06	1.4869e+06	1.61531e+07	6.21986e+06	3.01776e+06	3.46132e+06	977442	318152	1.72275e+06	1.31601e+06	9.07871e+06	1.38893e+06	2.14025e+06	1.47673e+06	1.63361e+06	1.67456e+06	1.74588e+06	2.0798e+06	2.43029e+06	2.8341e+06	2.51463e+06
pos-3.104_165.065	165.065	3.104	1-methylguanine	C6H7N5O	HMDB0003282	Organoheterocyclic compounds	Imidazopyrimidines	C04152					3.37612e+06	1.49222e+06	1.06864e+06	2.04984e+06	3.00355e+06	4.12623e+06	1.52367e+06	1.45605e+06	2.35761e+06	936459	1.4018e+06	1.63201e+06	2.31481e+06	1.68027e+06	1.53972e+06	1.52908e+06	1.31307e+06	1.57937e+06	1.39265e+06	1.48066e+06	1.55366e+06	1.33692e+06	1.40821e+06
pos-0.791_169.08486	169.085	0.791	1-methylhistidine	C7H11N3O2	HMDB0000001	Organic acids and derivatives	Carboxylic acids and derivatives	C01152	Metabolism|Metabolism	Amino acid metabolism|Global and overview maps	Histidine metabolism|Metabolic pathways	map00340|map01100	5.0363e+07	2.1506e+06	2.54735e+06	3.24096e+06	9.36599e+06	6.95413e+06	5.32728e+06	4.97241e+06	7.36501e+06	3.98635e+06	4.25205e+06	5.21065e+06	1.26281e+07	6.15197e+06	6.77311e+06	4.09791e+06	3.3366e+06	3.1391e+06	3.77724e+06	4.67307e+06	5.60671e+06	3.60659e+06	3.4894e+06
pos-4.695_142.07782	142.078	4.695	1-methylnaphthalene	C11H10	HMDB0032860	Benzenoids	Naphthalenes	C14082	Metabolism|Metabolism|Metabolism|Drug Development	Xenobiotics biodegradation and metabolism|Global and overview maps|Global and overview maps|Skeleton-based classification	Naphthalene degradation|Microbial metabolism in diverse environments|Degradation of aromatic compounds|Naphthalene family	map00626|map01120|map01220|map07114	3.08602e+07	3.28729e+07	5.60813e+06	8.40662e+06	972729	5.7755e+06	4.00585e+07	2.0315e+07	2.11877e+07	1.44402e+07	3.21837e+06	1.35488e+07	1.75663e+07	2.43774e+07	1.15771e+07	3.0772e+07	1.79947e+07	1.41275e+07	1.75713e+07	1.68851e+07	1.96967e+07	2.25499e+07	1.79664e+07
pos-6.819_142.0779	142.078	6.819	1-methylnaphthalene	C11H10	HMDB0032860	Benzenoids	Naphthalenes	C14082	Metabolism|Metabolism|Metabolism|Drug Development	Xenobiotics biodegradation and metabolism|Global and overview maps|Global and overview maps|Skeleton-based classification	Naphthalene degradation|Microbial metabolism in diverse environments|Degradation of aromatic compounds|Naphthalene family	map00626|map01120|map01220|map07114	1.38146e+06	594751	935953	3.22702e+06	769379	2.68594e+06	235283	880574	775337	693022	1.4939e+06	621055	407048	818389	797614	586662	1.08075e+06	898905	779851	861321	901030	1.16835e+06	630982
pos-6.566_142.07791	142.078	6.566	1-methylnaphthalene	C11H10	HMDB0032860	Benzenoids	Naphthalenes	C14082	Metabolism|Metabolism|Metabolism|Drug Development	Xenobiotics biodegradation and metabolism|Global and overview maps|Global and overview maps|Skeleton-based classification	Naphthalene degradation|Microbial metabolism in diverse environments|Degradation of aromatic compounds|Naphthalene family	map00626|map01120|map01220|map07114	873979	925804	4.26196e+06	5.31221e+06	2.17797e+06	2.78555e+06	1.1144e+06	1.57313e+06	1.08898e+06	1.29267e+06	2.16413e+06	1.81695e+06	941739	698371	637448	433130	1.33945e+06	1.41824e+06	1.10043e+06	1.02822e+06	931408	903612	855497
pos-5.587_142.0779	142.078	5.587	1-methylnaphthalene	C11H10	HMDB0032860	Benzenoids	Naphthalenes	C14082	Metabolism|Metabolism|Metabolism|Drug Development	Xenobiotics biodegradation and metabolism|Global and overview maps|Global and overview maps|Skeleton-based classification	Naphthalene degradation|Microbial metabolism in diverse environments|Degradation of aromatic compounds|Naphthalene family	map00626|map01120|map01220|map07114	1.88048e+06	1.01825e+06	2.98938e+06	6.75746e+06	1.42305e+06	3.42089e+06	1.15444e+06	1.10491e+06	1.6556e+06	1.66016e+06	3.61863e+06	1.55071e+06	959984	1.34869e+06	732618	561359	1.33658e+06	1.24822e+06	1.41389e+06	1.46076e+06	1.1486e+06	1.10764e+06	1.17094e+06
pos-6.105_142.07788	142.078	6.105	1-methylnaphthalene	C11H10	HMDB0032860	Benzenoids	Naphthalenes	C14082	Metabolism|Metabolism|Metabolism|Drug Development	Xenobiotics biodegradation and metabolism|Global and overview maps|Global and overview maps|Skeleton-based classification	Naphthalene degradation|Microbial metabolism in diverse environments|Degradation of aromatic compounds|Naphthalene family	map00626|map01120|map01220|map07114	6.15759e+06	3.62139e+06	7.04854e+06	8.38158e+06	527161	5.45904e+06	704626	3.13328e+06	1.77103e+06	4.83791e+06	4.25943e+06	2.99158e+06	4.32424e+06	4.69634e+06	4.2147e+06	3.01027e+06	3.40188e+06	4.00854e+06	4.48426e+06	4.25143e+06	4.60926e+06	3.69071e+06	3.0028e+06
neg-1.537_83.07332	83.0733	1.537	1-methylpyrrolinium	C5H9N									783160	289535	521198	191855	1.16165e+07	5.77393e+06	3.80768e+06	1.11916e+07	238052	251866	239837	650730	561625	402170	915363	414544	858041	891614	878254	871264	1.10223e+06	1.05313e+06	1.24154e+06
pos-0.711_83.07335	83.0734	0.711	1-methylpyrrolinium	C5H9N									8.62406e+08	151407351	1.57542e+08	157549076	2.22091e+08	162359705	1.33749e+08	2.82697e+08	1.18604e+08	1.50053e+08	1.50165e+08	133563017	1.22062e+08	1.49298e+08	1.62923e+08	1.49653e+08	1.29507e+08	1.36443e+08	1.30154e+08	1.38486e+08	1.42892e+08	1.12106e+08	1.40396e+08
pos-3.215_157.05284	157.053	3.215	1-nitrosonaphthalene	C10H7NO	HMDB0062189	Benzenoids	Naphthalenes	C14788	Metabolism	Xenobiotics biodegradation and metabolism	Metabolism of xenobiotics by cytochrome P450	map00980	4.20963e+06	1.69005e+06	3.73092e+06	1.49141e+07	2.97587e+06	6.69541e+06	2.00019e+06	5.64224e+06	3.68057e+06	3.23478e+06	9.22401e+06	4.07861e+06	2.19009e+06	3.86379e+06	3.03138e+06	2.09898e+06	3.15955e+06	3.65853e+06	1.87086e+06	3.23514e+06	3.75505e+06	3.34411e+06	3.98452e+06
neg-3.669_360.17796	360.178	3.669	1-o-(8r-hydroxy-8-methyl-3z,9-decadienoyl)-beta-d-glucopyranose	C17H28O8									83973.5	39474.1	108605	39085.7	83384	92876.2	66869.1	360833	112200	48804.8	75979.3	28409.5	49196.7	121247	101562	131767	109007	175394	109689	124587	148471	141949	138788
pos-3.555_360.17926	360.179	3.555	1-o-(8r-hydroxy-8-methyl-3z,9-decadienoyl)-beta-d-glucopyranose	C17H28O8									1.13827e+06	2.80478e+06	6.83814e+06	3.13851e+06	1.49924e+07	692237	6.34106e+06	3.09926e+06	2.74853e+06	3.02301e+06	2.59359e+06	1.10997e+06	9.5352e+06	1.68509e+06	3.15009e+06	4.45309e+06	1.76941e+06	1.71877e+06	2.94228e+06	2.64477e+06	1.88118e+06	1.79045e+06	1.76445e+06
neg-4.426_360.17819	360.178	4.426	1-o-(8r-hydroxy-8-methyl-3z,9-decadienoyl)-beta-d-glucopyranose	C17H28O8									1.00581e+06	376978	242006	468004	1.10142e+06	553152	815528	451449	586864	524230	629451	1.57568e+06	1.26677e+06	1.59037e+06	1.66195e+06	417663	2.18355e+06	2.57218e+06	2.20375e+06	2.33974e+06	2.28228e+06	2.28988e+06	2.84657e+06
pos-3.245_1028.5513	1028.55	3.245	1-o-[(3beta)-28-oxo-3-{[beta-d-ribopyranosyl-(1->3)-6-deoxy-alpha-l-mannopyranosyl-(1->2)-alpha-l-arabinopyranosyl]oxy}olean-12-en-28-yl]-beta-d-glucopyranose	C52H84O20									1.55088e+06	1.22325e+06	6.08493e+06	4.34229e+06	1.77339e+06	3.74703e+06	1.57734e+06	1.22339e+06	478546	509583	576740	1.04799e+06	1.36175e+06	984693	686076	1.71721e+06	1.36957e+06	1.06413e+06	1.33043e+06	758190	1.39843e+06	1.54144e+06	1.36676e+06
pos-3.638_990.60978	990.61	3.638	1-o-[{[(2z,6z,10z,14z,18z,22z,26z,30z,34e)-3,7,11,15,19,23,27,31,35,39-decamethyl-2,6,10,14,18,22,26,30,34,38-tetracontadecaen-1-yl]oxy}(hydroxy)phosphoryl]-5-o-phosphono-beta-d-ribofuranose	C55H92O11P2									351710	1.30066e+06	2.72869e+06	1.46604e+06	2.07063e+06	169370	535280	2.82892e+06	800865	744698	700445	481490	638280	337699	989409	1.15433e+06	587571	595992	1.02554e+06	830627	789771	777912	714919
neg-3.634_422.21653	422.217	3.634	1-octen-3-yl primeveroside	C19H34O10	HMDB0032960	Lipids and lipid-like molecules	Fatty Acyls						165229	1.93737e+06	2.82926e+06	1.40725e+06	1.84927e+06	316659	710133	1.47872e+06	1.91079e+06	2.76448e+06	492718	1.33426e+06	474202	265550	836014	1.38869e+06	958252	672010	1.18476e+06	950654	988378	947071	1.14337e+06
neg-3.473_422.21671	422.217	3.473	1-octen-3-yl primeveroside	C19H34O10	HMDB0032960	Lipids and lipid-like molecules	Fatty Acyls						476145	5.73568e+06	2.18449e+06	2.84333e+06	1.04943e+06	301243	1.84199e+06	1.75191e+06	1.45209e+07	5.4148e+06	1.91394e+07	2.12749e+07	1.37455e+07	5.65608e+06	9.72435e+06	2.01213e+07	5.74503e+06	5.16828e+06	7.58591e+06	5.6294e+06	5.75222e+06	4.94813e+06	6.08665e+06
pos-2.17_422.21573	422.216	2.17	1-octen-3-yl primeveroside	C19H34O10	HMDB0032960	Lipids and lipid-like molecules	Fatty Acyls						383709	3.94575e+06	3.95573e+06	2.30633e+06	209021	187026	2.31879e+06	645185	3.38788e+06	4.45686e+06	1.1064e+06	625985	388236	891685	957081	4.21063e+06	2.29693e+06	2.31254e+06	2.18289e+06	2.31704e+06	1.42507e+06	2.21021e+06	1.87365e+06
pos-6.517_521.3465	521.346	6.517	1-oleoylglycerophosphocholine	C26H52NO7P	HMDB0002815	Lipids and lipid-like molecules	Glycerophospholipids						2.33489e+07	1.10745e+07	5.28061e+06	1.55692e+06	3.64106e+07	1.1713e+07	1.51918e+07	9.96093e+06	21335333	1.74839e+07	8.92284e+06	2.21543e+07	1.35107e+08	3.16482e+08	3.42581e+08	1.39377e+08	1.1128e+08	1.30877e+08	1.40615e+08	1.18174e+08	1.10784e+08	1.09457e+08	1.06663e+08
pos-6.007_521.34637	521.346	6.007	1-oleoylglycerophosphocholine	C26H52NO7P	HMDB0002815	Lipids and lipid-like molecules	Glycerophospholipids						8890287667	4573486652	1108316759	3196534704	11909557174	5127512681	4205697885	8766702526	5118562376	2710185634	5305092625	5612870911	2956565480	4027037670	3344875809	3075089872	3809880776	3513091480	3423671501	3243444913	3294508039	3341901797	3070433485
pos-5.857_521.34636	521.346	5.857	1-oleoylglycerophosphocholine	C26H52NO7P	HMDB0002815	Lipids and lipid-like molecules	Glycerophospholipids						3630300775	1473873906	5.65752e+08	8.72546e+08	3757687396	1659819551	2984096575	2027275974	4662978915	8.90614e+08	1345682252	1441107485	9.61398e+08	1239737211	6.81382e+08	1084468962	1641614689	1621798957	1436214516	1298487962	1352058598	1345615201	1167395107
pos-5.857_521.34891	521.349	5.857	1-oleoylglycerophosphocholine	C26H52NO7P	HMDB0002815	Lipids and lipid-like molecules	Glycerophospholipids						6.32952e+08	1.58564e+08	9.00293e+07	1.26388e+08	5.13391e+08	2.44724e+08	2.97674e+08	1.92248e+08	4.2758e+08	9.38219e+07	1.73087e+08	1.48308e+08	1.01353e+08	127359352	8.14505e+07	1.10238e+08	1.65281e+08	2.14587e+08	1.92332e+08	1.65245e+08	1.73435e+08	1.22165e+08	1.19814e+08
pos-5.781_495.33066	495.331	5.781	1-palmitoylglycerophosphocholine	C24H50NO7P	HMDB0010382	Lipids and lipid-like molecules	Glycerophospholipids	C04230	Metabolism|Human Diseases	Lipid metabolism|Cancer: overview	Glycerophospholipid metabolism|Choline metabolism in cancer	map00564|map05231	11086420683	7953860348	3933419257	5981073546	21643821943	10169551531	6451254880	19265388688	8183179249	7220270348	11958321164	11566458493	6930638366	13391790191	10411266405	11453427684	9625167095	8609812664	9130679768	8740359389	8392172955	9005298972	8186499438
pos-5.622_495.33067	495.331	5.622	1-palmitoylglycerophosphocholine	C24H50NO7P	HMDB0010382	Lipids and lipid-like molecules	Glycerophospholipids	C04230	Metabolism|Human Diseases	Lipid metabolism|Cancer: overview	Glycerophospholipid metabolism|Choline metabolism in cancer	map00564|map05231	2291652565	2044825595	4.15376e+08	7.10477e+08	3031286369	1514403524	1498223259	2225086075	2286359011	8.06913e+08	2271777259	1612086056	1085393596	2102697075	1217099311	2335433274	9.40947e+08	1427467594	1414322283	1271311475	1281014554	1187752672	1272133806
neg-6.231_495.33175	495.332	6.231	1-palmitoylglycerophosphocholine	C24H50NO7P	HMDB0010382	Lipids and lipid-like molecules	Glycerophospholipids	C04230	Metabolism|Human Diseases	Lipid metabolism|Cancer: overview	Glycerophospholipid metabolism|Choline metabolism in cancer	map00564|map05231	6.16653e+07	8.92956e+07	2.94977e+07	4.38083e+07	1.07692e+08	3.82051e+07	1.98771e+07	7.05935e+07	3.90245e+07	4.12915e+07	6.98784e+07	5.45255e+07	9.96015e+07	1.59502e+08	1.66241e+08	2.77127e+08	9.65677e+07	1.07194e+08	1.11787e+08	1.06467e+08	1.04768e+08	9.29979e+07	9.73922e+07
pos-5.017_495.33108	495.331	5.017	1-palmitoylglycerophosphocholine	C24H50NO7P	HMDB0010382	Lipids and lipid-like molecules	Glycerophospholipids	C04230	Metabolism|Human Diseases	Lipid metabolism|Cancer: overview	Glycerophospholipid metabolism|Choline metabolism in cancer	map00564|map05231	1.8864e+07	3.17998e+07	6.62207e+06	6.56602e+06	7.53352e+06	1.35999e+07	2.58192e+07	2.70633e+06	3.71164e+07	1.1408e+07	1.06355e+07	8.37747e+06	2.84836e+06	1.36428e+07	2.24556e+07	8.73062e+06	1.03428e+07	1.13753e+07	5.98908e+06	9.55443e+06	1.17348e+07	1.0858e+07	1.16016e+07
neg-5.381_495.33217	495.332	5.381	1-palmitoylglycerophosphocholine	C24H50NO7P	HMDB0010382	Lipids and lipid-like molecules	Glycerophospholipids	C04230	Metabolism|Human Diseases	Lipid metabolism|Cancer: overview	Glycerophospholipid metabolism|Choline metabolism in cancer	map00564|map05231	8.69602e+06	6.44412e+06	1.7414e+07	1.08109e+07	7.08229e+06	6.83586e+06	9.45516e+06	3.89661e+06	4.5054e+06	1.341e+07	9.24184e+06	1.07118e+07	6.91597e+06	11522095	1.19911e+07	3.09061e+06	8.67627e+06	8.40038e+06	8.27234e+06	7.97208e+06	8.409e+06	7.49183e+06	8.38934e+06
neg-6.133_495.33178	495.332	6.133	1-palmitoylglycerophosphocholine	C24H50NO7P	HMDB0010382	Lipids and lipid-like molecules	Glycerophospholipids	C04230	Metabolism|Human Diseases	Lipid metabolism|Cancer: overview	Glycerophospholipid metabolism|Choline metabolism in cancer	map00564|map05231	3.88928e+07	5.246e+07	9.29757e+06	3.62503e+07	4.70617e+07	1.38216e+07	4.24675e+06	2.03773e+07	1.6363e+07	1.85108e+07	2.77634e+07	2.1027e+07	5.73164e+07	1.22544e+08	9.42529e+07	1.95307e+08	6.00387e+07	6.19674e+07	6.12339e+07	5.99337e+07	6.05382e+07	5.40452e+07	5.78416e+07
neg-7.218_495.33216	495.332	7.218	1-palmitoylglycerophosphocholine	C24H50NO7P	HMDB0010382	Lipids and lipid-like molecules	Glycerophospholipids	C04230	Metabolism|Human Diseases	Lipid metabolism|Cancer: overview	Glycerophospholipid metabolism|Choline metabolism in cancer	map00564|map05231	2.70694e+07	1.19625e+07	1.26079e+07	8.72054e+06	7.87689e+06	7.96696e+06	4.15376e+06	5.1411e+06	5.1505e+06	1.09476e+07	9.41681e+06	1.3327e+07	2.6956e+07	2.2027e+07	2.2424e+07	1.4486e+07	8.88287e+06	1.03727e+07	9.71921e+06	9.18113e+06	8.95853e+06	7.5994e+06	8.75699e+06
neg-7.021_495.33212	495.332	7.021	1-palmitoylglycerophosphocholine	C24H50NO7P	HMDB0010382	Lipids and lipid-like molecules	Glycerophospholipids	C04230	Metabolism|Human Diseases	Lipid metabolism|Cancer: overview	Glycerophospholipid metabolism|Choline metabolism in cancer	map00564|map05231	1.30179e+07	8.40831e+06	3.09612e+06	2.94887e+06	2.53342e+06	2.80218e+06	1.61444e+06	2.01544e+06	1.89277e+06	2.93248e+06	3.5114e+06	3.6736e+06	9.82499e+06	6.15306e+06	6.34493e+06	4.35568e+06	3.58262e+06	3.55666e+06	3.92471e+06	3.31716e+06	4.34759e+06	3.6931e+06	3.21738e+06
neg-6.923_495.33221	495.332	6.923	1-palmitoylglycerophosphocholine	C24H50NO7P	HMDB0010382	Lipids and lipid-like molecules	Glycerophospholipids	C04230	Metabolism|Human Diseases	Lipid metabolism|Cancer: overview	Glycerophospholipid metabolism|Choline metabolism in cancer	map00564|map05231	1.30179e+07	2.0097e+06	353908	6.24154e+06	88358.6	99244.2	53913.7	70633.9	66925.1	2.93248e+06	3.5114e+06	3.6736e+06	9.82499e+06	6.15306e+06	6.34493e+06	4.35568e+06	3.58262e+06	3.55666e+06	3.92471e+06	3.31716e+06	4.34759e+06	3.6931e+06	3.21738e+06
pos-4.745_158.10906	158.109	4.745	1-phenylcyclohex-1-ene	C12H14									1.27992e+08	4.22806e+07	1.61009e+07	2.25139e+07	2.95863e+06	3.47322e+07	1.61864e+08	5.56534e+07	6.9323e+07	4.81808e+07	1.36815e+07	4.5312e+07	6.6918e+07	7.31132e+07	4.22756e+07	9.37216e+07	5.96975e+07	5.61601e+07	6.05315e+07	6.64586e+07	5.80684e+07	5.6436e+07	5.34521e+07
pos-4.636_158.10905	158.109	4.636	1-phenylcyclohex-1-ene	C12H14									1.27992e+08	4.22806e+07	1.61009e+07	4.46761e+06	745193	9.22887e+06	1.61864e+08	5.56534e+07	6.9323e+07	4.81808e+07	1.36815e+07	4.5312e+07	6.6918e+07	7.31132e+07	4.22756e+07	9.37216e+07	5.96975e+07	5.61601e+07	6.05315e+07	6.64586e+07	5.80684e+07	5.6436e+07	5.34521e+07
pos-6.107_158.10908	158.109	6.107	1-phenylcyclohex-1-ene	C12H14									1.39105e+07	1.09645e+07	1.38703e+07	1.66988e+07	8.21004e+06	1.44227e+07	4.20535e+06	1.27439e+07	7.58835e+06	8.35738e+06	9.40707e+06	8.87755e+06	1.30077e+07	1.19285e+07	9.82536e+06	6.47579e+06	9.83067e+06	9.43702e+06	9.42292e+06	9.17439e+06	9.09499e+06	7.48903e+06	7.54529e+06
pos-4.225_158.10903	158.109	4.225	1-phenylcyclohex-1-ene	C12H14									1.27698e+06	1.35035e+06	218776	134420	686713	193293	720542	331599	8.90363e+06	231288	508641	370953	854647	472849	640194	313011	399918	480361	791982	794126	779357	881723	598274
pos-5.512_158.10909	158.109	5.512	1-phenylcyclohex-1-ene	C12H14									4.73194e+06	1.4925e+06	3.07064e+06	4.69265e+06	1.21353e+06	4.77654e+06	1.86689e+06	845005	1.47105e+06	1.08808e+06	2.99089e+06	1.81302e+06	1.32966e+06	2.07529e+06	1.39646e+06	465634	1.66066e+06	1.31805e+06	1.75297e+06	1.01585e+06	976035	1.08834e+06	1.08133e+06
neg-3.889_148.05212	148.052	3.889	1-phenylpropane-1_2-dione	C9H8O2									1.81059e+06	90019.1	110490	260566	5.48175e+06	1.47738e+06	1.99325e+06	535016	306849	281539	145041	190891	4.77004e+06	4.68308e+06	253861	1.37459e+06	770882	639991	633871	672884	751639	681829	658997
neg-3.168_148.05219	148.052	3.168	1-phenylpropane-1_2-dione	C9H8O2									2.40907e+06	3.41752e+06	2.80034e+06	3.65362e+06	8.39956e+06	3.38547e+06	4.95106e+06	6.6432e+06	2.70484e+06	3.95711e+06	4.32647e+06	3.33712e+06	3.24204e+06	2.25013e+06	4.30581e+06	4.65707e+06	2.11485e+06	2.37008e+06	2.41508e+06	2.50929e+06	3.02292e+06	3.97216e+06	3.40875e+06
pos-3.176_148.05207	148.052	3.176	1-phenylpropane-1_2-dione	C9H8O2									10110799434	5290109643	6702642991	8200342186	15249404298	11768770223	10175492506	14091991477	7158853142	7011024567	7665378847	7824225612	8450874443	6419339001	9173401354	7718865360	6501426734	6411782001	6671435588	6336458421	5565526654	7493175490	7342492348
pos-0.939_274.00897	274.009	0.939	1-phospho-alpha-d-galacturonate	C6H11O10P				C04037	Metabolism|Metabolism|Metabolism|Metabolism	Carbohydrate metabolism|Carbohydrate metabolism|Global and overview maps|Global and overview maps	Ascorbate and aldarate metabolism|Amino sugar and nucleotide sugar metabolism|Metabolic pathways|Biosynthesis of cofactors	map00053|map00520|map01100|map01240	5.553e+07	1.05028e+06	3.08342e+06	4.1628e+06	6.34126e+06	7.02511e+07	2.37023e+07	5.31509e+06	1.25472e+07	5.6444e+06	1.52456e+07	2.00415e+07	4.42169e+07	2.04613e+07	1.36876e+07	3.0626e+06	4.37667e+06	9.5563e+06	7.9514e+06	7.9789e+06	1.14093e+07	1.24431e+07	1.12034e+07
neg-0.955_274.00871	274.009	0.955	1-phospho-alpha-d-galacturonate	C6H11O10P				C04037	Metabolism|Metabolism|Metabolism|Metabolism	Carbohydrate metabolism|Carbohydrate metabolism|Global and overview maps|Global and overview maps	Ascorbate and aldarate metabolism|Amino sugar and nucleotide sugar metabolism|Metabolic pathways|Biosynthesis of cofactors	map00053|map00520|map01100|map01240	1.19604e+07	1.30455e+06	1.48932e+06	1.25214e+06	2.18953e+06	1.83918e+06	2.17247e+06	1.93133e+06	1.41527e+06	1.51835e+06	1.94071e+06	3.04591e+06	2.58329e+06	1.73818e+06	3.64722e+06	2.48557e+06	906699	1.18925e+06	1.22087e+06	1.11493e+06	1.10594e+06	1.5887e+06	1.64791e+06
neg-4.982_298.02942	298.029	4.982	1-pyrenylsulfate	C16H10O4S				C18269	Metabolism|Metabolism	Xenobiotics biodegradation and metabolism|Global and overview maps	Polycyclic aromatic hydrocarbon degradation|Microbial metabolism in diverse environments	map00624|map01120	4.62703e+06	1.26685e+07	7.77073e+06	1.20803e+07	1.14926e+07	2.77029e+07	1.4138e+08	4.5597e+07	1.57634e+06	2.06974e+06	115978	1.32874e+06	1.42942e+07	1.03139e+07	1.33209e+07	7.88092e+06	1.05885e+07	1.13275e+07	1.1286e+07	1.07751e+07	1.17763e+07	1.08775e+07	1.09329e+07
pos-3.336_129.04245	129.042	3.336	1-pyrroline-4-hydroxy-2-carboxylate	C5H7NO3	HMDB0002234	Organoheterocyclic compounds	Pyrrolines	C04282	Metabolism|Metabolism	Amino acid metabolism|Global and overview maps	Arginine and proline metabolism|Metabolic pathways	map00330|map01100	3.11416e+07	2.28786e+07	7.742e+06	1.24682e+07	7.02483e+07	4.19802e+07	1.50126e+07	1.84977e+07	1.55606e+07	7.00275e+06	1.32944e+07	2.22587e+07	1.79224e+07	1.46945e+07	1.08608e+07	1.46361e+07	2.37713e+07	2.17659e+07	1.18726e+07	1.58808e+07	1.91378e+07	1.50561e+07	1.83809e+07
pos-4.557_129.04243	129.042	4.557	1-pyrroline-4-hydroxy-2-carboxylate	C5H7NO3	HMDB0002234	Organoheterocyclic compounds	Pyrrolines	C04282	Metabolism|Metabolism	Amino acid metabolism|Global and overview maps	Arginine and proline metabolism|Metabolic pathways	map00330|map01100	4.89499e+06	2.82842e+06	5.06861e+06	5.01967e+06	459684	2.80892e+06	6.73427e+06	1.33226e+07	1.19284e+06	826808	1.55395e+06	1.92464e+06	1.52471e+06	272438	275024	878865	1.53036e+06	1.62698e+06	1.21605e+06	1.39699e+06	1.39472e+06	1.35463e+06	1.20804e+06
neg-4.686_433.21293	433.213	4.686	1-tauro-dinor-pge1	C20H35NO7S									4.26403e+06	1.02073e+06	4.42121e+06	4.39195e+06	2.02266e+06	7.83116e+06	1.79206e+06	3.74251e+06	2.55525e+06	2.74231e+06	3.92872e+06	4.06268e+06	3.56753e+06	3.71084e+06	3.76115e+06	1.15659e+06	1.97338e+06	1.98672e+06	2.52263e+06	2.55257e+06	3.25065e+06	2.90081e+06	2.82611e+06
pos-4.496_431.19751	431.198	4.496	1-tauro-dinor-pge2	C20H33NO7S									582712	325772	435911	1.34463e+06	146947	737516	258990	100801	229267	341234	434651	361724	599552	1.08499e+06	2.014e+07	241527	473992	433116	384577	376786	329521	329881	303361
pos-5.309_405.18172	405.182	5.309	1-tauro-tetranor-pge1	C18H31NO7S									729195	385659	446349	408711	586031	1.3946e+06	832782	201885	293487	548550	561363	503427	225175	321804	1.98503e+07	100223	398166	473549	353182	377605	322345	401489	275241
neg-3.657_405.18205	405.182	3.657	1-tauro-tetranor-pge1	C18H31NO7S									2.82904e+06	914604	415393	939412	580301	1.43172e+06	2.78591e+06	559855	813042	631421	383778	367978	562177	300062	799999	471137	347112	439513	430743	368162	436751	383143	423381
neg-4.395_405.18166	405.182	4.395	1-tauro-tetranor-pge1	C18H31NO7S									1.07633e+06	622948	288790	720607	78989.8	437299	373644	254045	734481	758100	317660	455797	621770	753837	1.87732e+06	1.72766e+06	769872	950853	824580	726865	582554	723235	569564
pos-3.283_453.13544	453.135	3.283	2-({2-[(4-hydroxyphenyl)amino]-2-oxoethyl}sulfamoyl)-n-(2-phenylethyl)benzamide	C17H34N3OP3S2									1.14796e+07	780139	595215	2.19136e+06	110878	1.06605e+07	2.41734e+06	1.38941e+06	1.13651e+06	833630	1.75128e+06	1.75939e+06	2.52716e+06	2.15571e+06	994406	784366	1.23761e+06	1.36619e+06	1.05535e+06	1.08358e+06	1.30549e+06	1.33833e+06	1.31052e+06
neg-4.594_278.07951	278.08	4.594	2-(1,2-dihydroxy-2-propanyl)-9-hydroxy-2,3-dihydro-7h-furo[3,2-g]chromen-7-one	C14H14O6									96656.2	564496	311020	233599	104002	60549.6	209007	245938	3.63647e+06	70011.8	39587.2	127042	4.22969e+06	236574	606601	3.68676e+06	588812	604389	606188	514521	636451	632710	574057
neg-3.568_195.03511	195.035	3.568	2-(1,3-benzothiazol-2-yloxy)ethanol	C9H9NO2S									57813	24193.2	260894	2.13401e+06	40200.2	710760	180764	435412	228505	242213	532400	115548	75264	115604	135005	116217	278768	269230	224536	235587	297405	306943	263582
pos-6.623_376.26035	376.26	6.623	2-(14,15-epoxyeicosatrienoyl) glycerol	C23H38O5	HMDB0013651	Lipids and lipid-like molecules	Glycerolipids						2.7346e+06	7.50098e+06	3.36472e+06	5.48437e+06	1.73871e+06	1.99494e+06	2.68561e+06	1.23119e+06	6.51827e+06	3.14398e+06	2.80295e+06	1.71471e+06	3.74885e+06	5.00977e+06	1.08102e+07	3.70878e+06	5.73709e+06	5.78293e+06	5.16658e+06	5.7817e+06	4.25116e+06	4.31923e+06	4.42163e+06
neg-0.743_245.03843	245.038	0.743	2-(1h-indol-3-yl)-4,5-dihydro-1,3-thiazole-4-carboxylate	C6H7N5O6									1.84343e+07	1.9934e+07	1.40836e+07	2.36635e+07	7.18104e+07	7.04981e+07	2.68707e+07	5.34288e+07	2.77901e+07	2.04965e+07	3.13351e+07	3.11441e+07	3.0277e+07	2.36588e+07	1.65226e+07	1.9312e+07	2.75099e+07	2.79934e+07	2.84012e+07	2.66632e+07	2.70572e+07	2.92974e+07	2.88773e+07
pos-0.893_447.23105	447.231	0.893	2-(2h-benzotriazol-2-yl)-4,6-bis(2-phenyl-2-propanyl)phenol										1.02498e+07	8.59235e+06	7.54669e+06	5.06814e+06	8.96565e+06	7.6693e+06	5.21686e+06	5.79563e+06	7.08693e+06	9.52629e+06	7.61061e+06	5.95648e+06	7.23203e+06	6.20417e+06	8.46268e+06	8.35204e+06	4.50232e+06	6.18319e+06	4.67678e+06	4.02743e+06	6.07823e+06	5.19334e+06	5.00178e+06
neg-3.22_447.23271	447.233	3.22	2-(2h-benzotriazol-2-yl)-4,6-bis(2-phenyl-2-propanyl)phenol	C18H33N5O8									197828	7.05751e+06	4.68294e+06	6.40896e+06	4.43454e+06	283595	4.40686e+06	3.15333e+06	6.02064e+06	1.03538e+07	4.66863e+06	6.80306e+06	4.31741e+06	3.22206e+06	5.62736e+06	2.14865e+06	3.70745e+06	4.71654e+06	5.06679e+06	5.9298e+06	4.24187e+06	5.50855e+06	3.53704e+06
pos-6.102_200.11949	200.119	6.102	2-(2-methylpropoxy)naphthalene	C14H16O	HMDB0035076	Benzenoids	Naphthalenes						9.93373e+06	5.97796e+06	1.19343e+07	1.20877e+07	1.35708e+07	1.49046e+07	1.29575e+07	1.97879e+07	6.58371e+06	6.79584e+06	9.49681e+06	8.27615e+06	8.13379e+06	1.25501e+07	7.03937e+06	5.91728e+06	8.35441e+06	9.06328e+06	7.9122e+06	6.91392e+06	7.05867e+06	6.28832e+06	6.05562e+06
pos-7.237_200.11951	200.12	7.237	2-(2-methylpropoxy)naphthalene	C14H16O	HMDB0035076	Benzenoids	Naphthalenes						2.09088e+06	776730	1.45339e+06	950928	839025	1.82719e+06	1.42329e+06	1.41276e+06	521583	797346	869466	1.14651e+06	1.57007e+06	2.81009e+06	3.13304e+06	1.14182e+06	1.75847e+06	1.89406e+06	1.82351e+06	1.35306e+06	1.30922e+06	1.31547e+06	1.37301e+06
pos-6.224_200.11952	200.12	6.224	2-(2-methylpropoxy)naphthalene	C14H16O	HMDB0035076	Benzenoids	Naphthalenes						1.57313e+07	1.77302e+07	3.48056e+07	4.60793e+07	2.35019e+07	3.12532e+07	4.08932e+06	3.32495e+07	1.70686e+07	1.77859e+07	2.4304e+07	2.0007e+07	1.55734e+07	17905742	1.04917e+07	8.7272e+06	1.80572e+07	1.91112e+07	1.88508e+07	1.76925e+07	1.64841e+07	1.55895e+07	1.50676e+07
pos-5.018_200.11968	200.12	5.018	2-(2-methylpropoxy)naphthalene	C14H16O	HMDB0035076	Benzenoids	Naphthalenes						849696	130001	424987	1.66698e+06	259962	476539	504065	488732	330324	165247	641373	325183	160512	285974	180065	266299	424041	431717	473630	341566	315410	273002	282571
pos-6.108_224.11942	224.119	6.108	2-(2-phenylcyclobutyl)phenol	C16H16O	HMDB0134565	Phenylpropanoids and polyketides	Stilbenes						1.42586e+07	9.61863e+06	1.2575e+07	17334586	5.97083e+06	1.47478e+07	2.37859e+06	1.13784e+07	6.23604e+06	7.59567e+06	8.14434e+06	8.24389e+06	1.25094e+07	1.23148e+07	8.73987e+06	6.13086e+06	9.53809e+06	9.26777e+06	9.53125e+06	8.90963e+06	8.4429e+06	7.14569e+06	6.31412e+06
neg-1.572_331.04688	331.047	1.572	2-(3,4-dihydroxy-5-methoxyphenyl)-5,7-dihydroxy-4-oxo-4h-chromen-3-olate	C19H9NO5									350627	1.18117e+06	977404	792298	970824	474356	431736	591666	824950	1.49401e+06	806315	474403	768178	284787	1.18798e+06	1.0775e+06	577143	521345	658761	664440	687507	648051	620887
neg-3.419_447.0945	447.094	3.419	2-(3,4-dihydroxyphenyl)-5-(hexopyranosyloxy)-3,7-chromeniumdiolate	C16H21N3O10S									80519.4	128985	213999	162733	228935	121283	328486	311153	587641	410511	705385	682953	146984	308757	3.00508e+06	391446	313662	386632	387915	530659	321174	397615	377971
pos-3.537_299.17291	299.173	3.537	2-(3-carboxy-3-(trimethylammonio)propyl)-l-histidine	C13H23N4O4	HMDB0059617	Organic acids and derivatives	Carboxylic acids and derivatives						1.48687e+06	568482	676220	217300	1.65e+06	2.27405e+06	1.68503e+06	497699	336101	780384	196154	1.02835e+06	825945	972260	1.38155e+06	664231	776739	615978	637936	730051	697765	814174	896166
neg-0.797_256.11667	256.117	0.797	2-(3-carboxy-3-aminopropyl)-l-histidine	C10H16N4O4	HMDB0011655	Organic acids and derivatives	Carboxylic acids and derivatives	C04441					398736	1.55045e+06	1.92094e+06	742777	2.79457e+06	797999	2.2925e+06	4.09168e+06	1.08909e+06	1.98828e+06	1.20146e+06	754149	182309	326854	1.38131e+06	2.20089e+06	1.31276e+06	1.33383e+06	1.24758e+06	915174	1.24148e+06	1.04992e+06	1.16196e+06
neg-3.401_423.19683	423.197	3.401	2-(4-chlorophenyl)-1-{4-[2-(diethylamino)ethoxy]phenyl}-1-phenylethanol	C26H30ClNO2									227528	143989	350153	514555	968091	1.16428e+06	143181	330976	1.1767e+06	574905	1.09303e+06	2.26601e+06	1.78529e+06	601926	1.52617e+06	857243	331039	371912	392321	225870	415358	512367	494432
pos-0.735_367.12	367.12	0.735	2-(4-chlorophenyl)-n-[n-(4,7-dimethyl-2-quinazolinyl)carbamimidoyl]acetamide	C19H18ClN5O									5.76744e+06	3.48214e+06	1.68033e+06	3.60664e+06	1.4594e+07	1.44999e+07	7.10008e+06	1.51325e+07	3.8101e+06	2.6002e+06	5.00376e+06	3.24195e+06	1.74831e+06	4.31415e+06	3.81091e+06	2.74348e+06	7.04698e+06	6.01332e+06	6.56951e+06	7.38625e+06	6.77408e+06	6.60922e+06	7.05584e+06
pos-4.629_402.31205	402.312	4.629	2-(5-((3z,13z)-eicosa-3,13-dien-1-yl)furan-2-yl)-ethanoic acid	C26H42O3									2.69902e+06	4.64928e+06	223245	104035	190666	247715	3.25303e+06	184773	2.84405e+06	128273	82423.4	259974	2.90004e+06	129723	1.68683e+06	272218	1.76122e+06	1.86298e+06	1.55645e+06	1.51564e+06	1.48095e+06	1.57161e+06	1.52984e+06
neg-3.743_264.10304	264.103	3.743	2-(6'-methylthio)hexylmalate	C11H20O5S				C17226	Metabolism|Metabolism	Biosynthesis of other secondary metabolites|Global and overview maps	Glucosinolate biosynthesis|2-Oxocarboxylic acid metabolism	map00966|map01210	528689	119854	73918.3	139858	293247	445354	786781	242418	332579	377303	301238	198748	538777	488836	1.70636e+06	511393	344036	325400	259745	319503	245910	258833	353367
neg-3.647_264.10304	264.103	3.647	2-(6'-methylthio)hexylmalate	C11H20O5S				C17226	Metabolism|Metabolism	Biosynthesis of other secondary metabolites|Global and overview maps	Glucosinolate biosynthesis|2-Oxocarboxylic acid metabolism	map00966|map01210	138187	68404	83131	793775	125701	92626	123510	95236	164335	144899	63311.9	81537.7	446971	629544	291622	485541	319288	317437	366197	336484	471165	417912	273714
neg-3.646_278.1185	278.118	3.646	2-(7'-methylthio)heptylmalate	C12H22O5S				C17230	Metabolism|Metabolism	Biosynthesis of other secondary metabolites|Global and overview maps	Glucosinolate biosynthesis|2-Oxocarboxylic acid metabolism	map00966|map01210	5.66595e+06	47048.3	186821	143571	232994	4.10401e+06	9.52485e+06	362253	223014	558626	483595	1.98068e+06	166569	475369	467093	211330	447006	541874	570075	562610	573549	534150	834308
pos-6.666_362.28111	362.281	6.666	2-(8-[5]-ladderane-octanyl)-sn-glycerol	C23H38O3									615987	193828	290351	898855	339404	609475	1.02786e+06	275517	298220	256651	1.88271e+06	304486	431523	566727	625234	525473	665291	550452	563433	547878	681912	472341	471115
pos-5.615_362.28078	362.281	5.615	2-(8-[5]-ladderane-octanyl)-sn-glycerol	C23H38O3									2.23794e+06	2.46493e+06	832781	1.1188e+06	1.29431e+06	1.60181e+06	1.01002e+06	902460	1.1355e+06	640113	790410	1.06949e+06	1.2891e+06	662523	275322	769033	703518	863923	590010	839836	544475	482836	512002
pos-6.228_362.28063	362.281	6.228	2-(8-[5]-ladderane-octanyl)-sn-glycerol	C23H38O3									2.25471e+06	1.5358e+06	4.76158e+06	9.68089e+06	1.21804e+06	2.26163e+06	549708	3.02903e+06	2.89143e+06	1.05953e+06	3.58101e+06	861465	1.40679e+06	1.22715e+06	735782	736442	1.35049e+06	1.68444e+06	1.45792e+06	1.4225e+06	1.2329e+06	1.45121e+06	1.46713e+06
pos-6.107_654.45391	654.454	6.107	2-(9r-(5z,9z-tetracosadienoyloxy)-3-methyl-2z-decenoyloxy)-ethanesulfonic acid	C37H66O7S									7.00175e+06	1.25822e+07	1.60991e+07	2.00236e+07	1.37668e+06	8.6754e+06	464675	7.25244e+06	4.7079e+06	7.24278e+06	7.45084e+06	5.29937e+06	1.05168e+07	1.18848e+07	7.20281e+06	4.96477e+06	9.15392e+06	8.92144e+06	8.84541e+06	6.60611e+06	7.63691e+06	6.48123e+06	6.03636e+06
pos-0.899_268.07844	268.078	0.899	2(alpha-d-mannosyl)-d-glycerate	C9H16O9									1.47343e+07	2.08346e+06	897999	2.67115e+06	2.3284e+07	2.28099e+07	3.31334e+07	7.97966e+06	2.02772e+06	1.71509e+06	1.98026e+06	2.32795e+06	2.97754e+06	2.84231e+06	1.83278e+06	1.63519e+06	3.86496e+06	2.95502e+06	3.48814e+06	3852093	3.53717e+06	3.1929e+06	3.63208e+06
neg-0.84_268.07924	268.079	0.84	2(alpha-d-mannosyl)-d-glycerate	C9H16O9									2.93426e+07	1.49161e+08	8.74538e+07	132487723	1.07286e+08	107023295	7.17486e+07	8.66524e+07	1.30863e+08	1.28184e+08	1.21428e+08	204767799	109760024	1.21549e+08	1.7784e+08	1.30307e+08	1.02259e+08	8.93267e+07	9.11924e+07	9.56903e+07	9.13268e+07	1.00927e+08	9.3903e+07
pos-0.672_379.15979	379.16	0.672	2-(arabinosylamino)-3-(glucosylamino)propanenitrile	C14H25N3O9	HMDB0039505	Organic oxygen compounds	Organooxygen compounds						2.69534e+06	7.62598e+06	7.65564e+06	4.48615e+06	799146	2.00295e+06	1.57383e+06	2.92248e+06	4.69075e+06	6.19111e+06	1.72134e+06	1.56163e+06	2.93919e+06	2.49475e+06	3.76788e+06	3.92821e+06	2.63517e+06	2.72975e+06	3.02442e+06	3.44893e+06	3.47566e+06	3.40653e+06	3.67978e+06
neg-0.896_254.09985	254.1	0.896	2-(beta-d-glucosyl)-sn-glycerol	C9H18O8									869178	2.12556e+06	3.57376e+06	6.41783e+06	2.93073e+06	3.32368e+06	2.79111e+06	5.69583e+06	2.34652e+06	3.93412e+06	2.67998e+06	2.43438e+06	1.83692e+06	2.05224e+06	2.60305e+06	2.8298e+06	2.81095e+06	2.38842e+06	2.61972e+06	2.90867e+06	2.44077e+06	2.58235e+06	2.95842e+06
pos-3.389_241.07665	241.077	3.389	2-(ethylsulfinylmethyl)phenyl methylcarbamate	C11H15NO3S	HMDB0040289	Benzenoids	Benzene and substituted derivatives						429668	345585	283497	301215	3.80397e+06	9.63872e+06	7.7327e+06	3.83955e+06	370926	301227	277092	355432	396726	326224	493840	335866	492758	368027	358848	347340	318333	399173	382367
neg-1.592_217.05822	217.058	1.592	2-(hydroxymethyl)-3-(acetamidomethylene)succinate	C8H11NO6				C04690	Metabolism	Metabolism of cofactors and vitamins	Vitamin B6 metabolism	map00750	4.44706e+06	2.94026e+06	1.48304e+06	1.43135e+06	3.98174e+06	2.86682e+06	2.39682e+06	1.69074e+06	1.58017e+06	1.59224e+06	1.98243e+06	2.38218e+06	2.27638e+06	985701	1.378e+06	1.83533e+06	1.39551e+06	1.41222e+06	1.64621e+06	1.58125e+06	1.5067e+06	1.54812e+06	1.56591e+06
neg-4.444_304.22453	304.225	4.444	2,15,16-trihydroxy palmitic acid	C16H32O5									503384	36192.7	32759.8	43320.2	83096	107664	65640.1	55246.2	39689.7	51345.4	42676.1	40483.9	331868	2.49286e+06	692380	266162	308321	281205	265230	399383	313204	252040	321119
pos-5.082_529.31539	529.315	5.082	pe(22:4(7z,10z,13z,16z)/0:0)	C27H48NO7P									890899	586424	152340	242024	600592	386221	573055	163812	1.20831e+06	111799	1.45459e+06	410828	973239	1.22103e+06	1.04146e+06	1.92563e+06	541571	464127	532801	567206	700281	872926	505849
pos-6.06_529.3153	529.315	6.06	pe(22:4(7z,10z,13z,16z)/0:0)	C27H48NO7P									5.75424e+07	3.4822e+07	8.55429e+06	1.70078e+07	1.03052e+08	5.21412e+07	4.11912e+07	5.4327e+07	3.10899e+07	2.19015e+07	4.0435e+07	4.51252e+07	4.25972e+07	2.79659e+07	2.22805e+07	1.68775e+07	1.86148e+07	2.30195e+07	2.55999e+07	2.34719e+07	2.13625e+07	21009191	1.76141e+07
neg-5.675_529.27754	529.278	5.675	haloperidol decanoate	C31H41ClFNO3									2.15959e+06	3.64548e+06	6.32051e+06	4.71728e+06	1.00962e+06	1.30942e+06	1.38949e+06	832634	779326	3.01234e+06	1.42571e+06	2.99602e+06	867608	763656	1.81204e+06	747527	1.82799e+06	1.85208e+06	2.2468e+06	1.93007e+06	1.94209e+06	1.98675e+06	1.76638e+06
neg-1.366_146.0576	146.058	1.366	2,2-dimethylsuccinic acid	C6H10O4	HMDB0002074	Lipids and lipid-like molecules	Fatty Acyls						1.29295e+06	2.45815e+06	3.22471e+06	2.90835e+06	1.18595e+07	3.52435e+06	2.95681e+06	1.28263e+07	1.93099e+06	1.6053e+06	1.49887e+06	2.1782e+06	3.17219e+06	1.63419e+06	1.05981e+06	3.51669e+06	2.46779e+06	2.24908e+06	2.16166e+06	2.43832e+06	2.42438e+06	2.61618e+06	2.5287e+06
pos-0.882_133.10973	133.11	0.882	2,2'-iminodipropan-1-ol	C6H15NO2									929017243	2.71516e+08	6.42633e+07	5.58561e+08	6.3325e+08	9.23583e+08	505130674	1.80464e+08	2.16852e+08	1.23301e+08	3.6626e+08	3.25532e+08	4.04461e+08	5.841e+08	3.17787e+08	2.5726e+08	3.18655e+08	2.70086e+08	3.00886e+08	2.93462e+08	2.75371e+08	3.09826e+08	3.35451e+08
neg-5.049_527.30087	527.301	5.049	pe(0:0/22:5(4z,7z,10z,13z,16z))	C27H46NO7P									7.2586e+07	5.96829e+07	7.49582e+06	6.14439e+06	5.68269e+07	2.07991e+07	7.67907e+07	1.31042e+07	1.13716e+08	1.52641e+07	2.13091e+07	2.14773e+07	6.84031e+07	5.84247e+07	5.47465e+07	5.29678e+07	4.49027e+07	4.25083e+07	4.62977e+07	4.11698e+07	4.26104e+07	3.73048e+07	4.19728e+07
neg-3.56_296.0927	296.093	3.56	2,3,9,10-tetrahydroxy-5,6-dihydroisoquinolino[3,2-a]isoquinolinium	C17H14NO4									135731	60379.5	119703	62051.3	85106.7	50068.9	89867.4	2.85469e+06	47480.2	33308.5	68201.5	29949.9	212209	405013	400798	312505	254308	277787	245645	260813	292413	290779	233346
pos-1.497_234.11638	234.116	1.497	2,3-dihydro-1h,1'h-2,3'-biindole	C8H20N4P2									269504	661504	398320	529500	294667	183827	197380	358524	1.69451e+06	743153	858732	168838	858099	201619	567951	652802	520330	477914	463838	470886	303920	470665	422334
neg-9.562_500.31682	500.317	9.562	2,3-dihydroxyolean-12-ene-23,28-dioate	C27H48O6S									3.44822e+06	1.95661e+07	252868	312032	1.3911e+07	2.45741e+07	2.79235e+07	1.55594e+06	1.60333e+07	3.10623e+06	6.43698e+06	2.72687e+06	3.17459e+07	2.01421e+07	2.50138e+06	528803	2.05416e+06	2.06992e+06	1.75192e+06	2.01469e+06	1.52146e+06	1.41485e+06	1.47843e+06
neg-5.598_500.3166	500.317	5.598	2,3-dihydroxyolean-12-ene-23,28-dioate	C29H45N2O3P									2.42838e+06	478368	158017	272619	388296	1.6951e+06	4.61825e+06	165071	3.11243e+06	2.22513e+06	2.4025e+06	589595	1.94165e+06	2.10398e+06	5.65849e+06	279734	1.12297e+06	1.05783e+06	1.38378e+06	1.12068e+06	1.21949e+06	924141	1.17902e+06
neg-6.093_500.31675	500.317	6.093	2,3-dihydroxyolean-12-ene-23,28-dioate	C29H45N2O3P									9.7757e+06	9.11816e+06	1.86003e+06	7.23031e+06	6.59545e+06	3.58157e+06	3.86163e+06	1.15975e+07	3.16937e+06	3.3504e+06	1.95558e+06	3.87814e+06	1.91024e+06	1.36753e+06	1.20043e+07	7.53812e+06	2.19023e+06	3.15544e+06	3.0724e+06	3.26108e+06	2.00897e+06	3.59716e+06	3.61663e+06
neg-9.317_500.31682	500.317	9.317	2,3-dihydroxyolean-12-ene-23,28-dioate	C21H49N4O5PS									8.37695e+07	1.95661e+07	1.11036e+07	9.99407e+06	1.38238e+07	2.45741e+07	2.05713e+07	5.26942e+07	1.60333e+07	2.1977e+07	1.58003e+07	1.20369e+07	3.17459e+07	2.01421e+07	3.5252e+07	5.23733e+07	2.04905e+07	1.89321e+07	1.79608e+07	2.3269e+07	2.00475e+07	1.99458e+07	1.93912e+07
neg-5.371_308.19598	308.196	5.371	2,3-dinor prostaglandin e1	C18H30O5									5.57693e+06	73384.9	56369.2	114847	505592	9.13864e+06	3.1734e+06	97891.8	382944	629685	623361	1.0801e+06	871652	605492	443525	69555.1	618030	708806	581891	600932	666691	546751	673164
pos-5.31_348.19009	348.19	5.31	2,3-dinor-11尾-prostaglandin f2伪	C18H30O5									4.3836e+08	1.36277e+08	1.76681e+08	1.55631e+08	1.38174e+08	4.41095e+08	3.01486e+08	5.63245e+07	8.71955e+07	2.09733e+08	2.15478e+08	199160858	6.77034e+07	9.58505e+07	1.22921e+08	3.31515e+07	1.90001e+08	1.99086e+08	1.86811e+08	1.85619e+08	1.401e+08	9.71707e+07	1.03131e+08
pos-5.311_326.2081	326.208	5.311	2,3-dinor-11尾-prostaglandin f2伪	C18H30O5									4.42356e+08	1.38544e+08	1.80378e+08	1.59968e+08	1.38637e+08	4.45781e+08	3.0601e+08	5.70135e+07	8.81386e+07	212530794	217712121	2.01732e+08	6.90056e+07	9.72347e+07	1.25107e+08	3.37499e+07	1.92501e+08	2.00468e+08	1.88926e+08	1.87631e+08	1.42079e+08	9.86503e+07	104588261
neg-8.593_640.58148	640.581	8.593	2,3-di-o-dihydro-14,15-geranylgeranyl-sn- glycerol	C43H76O3									381746	329720	988783	561005	116473	909104	374315	63069.2	1.09928e+06	984596	1.21939e+06	918137	548680	2.02696e+06	1.01133e+06	212818	700423	630130	409915	501222	759736	611201	704361
neg-5.133_527.30083	527.301	5.133	pe(0:0/22:5(4z,7z,10z,13z,16z))	C27H46NO7P									1.76225e+08	6.59018e+07	7.40983e+06	1.06631e+07	8.17716e+07	3.15246e+07	8.42118e+07	2.44801e+07	8.91825e+07	1.43941e+07	3.49165e+07	2.89665e+07	1.7092e+08	1.07024e+08	6.00834e+07	8.37258e+07	50713976	4.67919e+07	4.65767e+07	4.99122e+07	4.83383e+07	4.51025e+07	4.29858e+07
neg-5.723_527.30073	527.301	5.723	pe(0:0/22:5(4z,7z,10z,13z,16z))	C27H46NO7P									1.93451e+07	1.85282e+07	6.2398e+07	6.41757e+07	6.85017e+07	7.20964e+07	6.05081e+07	3.79073e+07	5.98977e+07	8.97871e+07	4.05192e+07	7.21266e+07	1.13766e+07	2.73068e+07	2.51401e+07	1.85221e+07	2.75756e+07	2.18009e+07	3.0944e+07	2.84634e+07	2.70719e+07	2.6685e+07	2.66945e+07
pos-4.299_118.04154	118.042	4.299	2,4,6-octatriyn-1-ol	C8H6O	HMDB0030968	Lipids and lipid-like molecules	Fatty Acyls						1.27914e+07	1.93947e+06	2.28332e+06	2.28262e+06	1.46576e+07	8.43104e+06	7.744e+06	7.99781e+06	2.17669e+06	3.22254e+06	2.8294e+06	6.16312e+06	4.06596e+06	5.86865e+06	2.18885e+06	3.3085e+06	2.47296e+06	2.35925e+06	3.57501e+06	2.71291e+06	2.81838e+06	3.73534e+06	2.44702e+06
pos-1.592_118.04167	118.042	1.592	2,4,6-octatriyn-1-ol	C8H6O	HMDB0030968	Lipids and lipid-like molecules	Fatty Acyls						2.76123e+08	3.00709e+08	2.8973e+08	2.78982e+08	6.10968e+08	3.36858e+08	3.67866e+08	4.79509e+08	2.96427e+08	318575583	3.22972e+08	2.68195e+08	3.55426e+08	2.3445e+08	3.46941e+08	3.18181e+08	256680119	2.73657e+08	2.76173e+08	2.98826e+08	2.91841e+08	3.08558e+08	297269911
pos-0.916_118.04159	118.042	0.916	2,4,6-octatriyn-1-ol	C8H6O	HMDB0030968	Lipids and lipid-like molecules	Fatty Acyls						4.44543e+08	359031053	3.15498e+08	3.02002e+08	7.21794e+08	2.75487e+08	294778330	4.57486e+08	3.48958e+08	3.70948e+08	4.22472e+08	3.51198e+08	4.70965e+08	3.0896e+08	445480764	4.50775e+08	2.9672e+08	302983325	2.99947e+08	2.85549e+08	3.09046e+08	2.82035e+08	3.08165e+08
pos-3.546_289.18901	289.189	3.546	2,4,6-triisobutyl-1,3,5-dithiazinane	C15H31NS2									939565	212602	170210	137142	468652	817319	214726	331773	179728	186773	619495	318729	1.81445e+06	1.01348e+06	1.48314e+06	705551	775219	722963	519760	712143	704185	529498	765690
neg-3.167_248.00127	248.001	3.167	2,4-db	C10H10Cl2O3				C14404					5.22649e+06	546193	443335	527851	5.49033e+06	6.11717e+06	2.14011e+06	1.50067e+06	650679	471266	694575	1.21905e+06	1.81531e+06	977468	608369	475989	973965	967898	799554	743766	479135	576748	648484
neg-5.602_248.00033	248	5.602	2,4-db	C10H10Cl2O3				C14404					339621	53197.8	73310.6	108528	116243	95881.4	57217.5	67533	338605	98943.6	89723	217621	61112.1	60609.6	53956.2	58579.4	340906	401751	383833	403663	378671	359410	352396
neg-4.398_184.01156	184.012	4.398	2,4-dinitrophenol	C6H4N2O5				C02496					3.74591e+06	1.21867e+06	1.07358e+06	1.3233e+06	7.12902e+06	4.16946e+06	2.97668e+06	3.5284e+06	1.66148e+06	1.25321e+06	1.41222e+06	1.97998e+06	3.32793e+06	1.91448e+06	949074	1.33592e+06	1.80018e+06	1.88483e+06	1.74345e+06	1.89871e+06	2.20844e+06	1.75443e+06	1.88071e+06
pos-4.42_208.12459	208.125	4.42	2,4-diphenyl-1-butene	C16H16	HMDB0032563	Phenylpropanoids and polyketides	Linear 1,3-diarylpropanoids	C14562					714172	921115	432164	738952	876090	417018	4.91987e+06	1.34498e+06	1.11423e+06	1.31497e+06	557064	417225	664613	1.00689e+06	2.39701e+06	258012	514316	397179	396698	401906	360872	483307	462262
pos-0.659_208.12444	208.124	0.659	2,4-diphenyl-1-butene	C16H16	HMDB0032563	Phenylpropanoids and polyketides	Linear 1,3-diarylpropanoids	C14562					810615	4.79526e+06	6.43896e+06	2.64558e+06	1.62306e+06	1.64028e+06	1.37078e+07	2.84951e+06	5.83191e+06	6.22382e+06	5.10362e+06	3.42382e+06	3.56428e+06	2.73879e+06	4.60091e+06	5.43854e+06	3.92914e+06	2.94311e+06	4.55883e+06	4.69033e+06	4.61027e+06	3.74732e+06	5.15791e+06
pos-4.256_208.12459	208.125	4.256	2,4-diphenyl-1-butene	C16H16	HMDB0032563	Phenylpropanoids and polyketides	Linear 1,3-diarylpropanoids	C14562					1.63907e+06	1.58586e+06	1.13381e+06	848653	214112	735766	2.87557e+06	211334	2.16314e+06	1.51323e+06	816717	1.22634e+06	932822	2.03208e+06	2.40407e+06	1.43659e+06	1.36318e+06	1.6994e+06	1.45765e+06	1.41253e+06	1.44423e+06	1.18737e+06	1.56691e+06
neg-5.507_527.30073	527.301	5.507	pe(0:0/22:5(4z,7z,10z,13z,16z))	C27H46NO7P									2.17107e+07	1.08729e+07	2.85747e+06	2.40237e+06	2.32582e+07	1.02701e+07	1.12493e+07	6.41703e+06	1.12279e+07	3.88723e+06	6.04585e+06	8.71916e+06	1.45314e+07	9.26366e+06	9.8906e+06	8.72888e+06	7.04109e+06	7.43313e+06	7.93002e+06	6.819e+06	6.57724e+06	6.42063e+06	6.73455e+06
neg-5.615_527.30072	527.301	5.615	pe(0:0/22:5(4z,7z,10z,13z,16z))	C27H46NO7P									1.0219e+08	4.15703e+07	6.75074e+06	6.77895e+06	7.57067e+07	2.80621e+07	2.67414e+07	1.76764e+07	2.16556e+07	1.5507e+07	2.76137e+07	3.15756e+07	6.95665e+07	3.25641e+07	4.4292e+07	2.97269e+07	1.98782e+07	2.2307e+07	1.87118e+07	2.13188e+07	2.11884e+07	2.01925e+07	1.89697e+07
pos-4.715_357.1598	357.16	4.715	2,4-di-tert-butyl-6-(5-chlorobenzotriazol-2-yl) phenol	C20H24ClN3O									101845	270973	137640	156953	84003.8	486319	302992	247456	669536	930311	135455	206926	1.26859e+07	1.51392e+07	2.34181e+07	1.46887e+07	9.33478e+06	8.491e+06	9.79689e+06	8.22699e+06	7.17757e+06	6.39377e+06	5.99164e+06
neg-4.23_110.07287	110.073	4.23	2,4-heptadienal	C7H10O									171775	167560	443569	1.30822e+06	195767	884242	61638.7	585016	224055	317280	474214	447980	66714.5	102440	50557	115277	229094	170311	158573	188832	238052	151580	219016
pos-6.571_110.07289	110.073	6.571	2,4-heptadienal	C7H10O									2.86724e+06	2.51853e+06	7.23704e+06	1.32551e+07	2.68701e+06	8.3275e+06	2.98062e+06	3.98713e+06	2.86197e+06	3.23674e+06	6.991e+06	4.5993e+06	2.0218e+06	1.8253e+06	1.90485e+06	1.33889e+06	3.69414e+06	3.39197e+06	2.72928e+06	2.58473e+06	3.35963e+06	1.5781e+06	2.49387e+06
neg-5.519_110.07271	110.073	5.519	2,4-heptadienal	C7H10O									1.18655e+07	6.07903e+06	1.3243e+07	1.79736e+07	2.81255e+06	1.87129e+07	3.02811e+06	6.72086e+06	8.69543e+06	8.5983e+06	1.23066e+07	1.05262e+07	7.11676e+06	7.63298e+06	6.24029e+06	4.47834e+06	6.35609e+06	6.65598e+06	6.16346e+06	6.18776e+06	6.21858e+06	6.2984e+06	5.93327e+06
neg-4.63_110.07288	110.073	4.63	2,4-heptadienal	C7H10O									439785	572765	2.43134e+06	3.59905e+06	273216	591643	118821	585814	1.00015e+06	732800	1.6437e+06	1.35597e+06	433116	403302	291050	813676	648618	694760	639065	712614	658064	717407	856572
pos-5.829_527.29979	527.3	5.829	pe(0:0/22:5(4z,7z,10z,13z,16z))	C27H46NO7P									2.56408e+08	7.33061e+07	6.93909e+07	1.08415e+08	3.37479e+08	5.94543e+08	2.79534e+08	1.43959e+08	1.25671e+08	147291450	1.76395e+08	2.63761e+08	1.1736e+08	1.65169e+08	5.55774e+07	3.83158e+07	1.173e+08	1.02196e+08	1.00803e+08	1.03343e+08	1.01387e+08	8.7492e+07	9.06023e+07
pos-5.504_527.29979	527.3	5.504	pe(0:0/22:5(4z,7z,10z,13z,16z))	C27H46NO7P									6.64978e+07	9.50202e+06	4.52306e+06	4.70422e+06	4.62595e+07	2.36328e+07	2.40617e+07	1.93715e+07	1.86533e+07	4.87359e+06	9.33566e+06	1.6951e+07	3.07002e+07	2.20988e+07	1.88771e+07	1.37067e+07	1.71323e+07	1.54768e+07	1.3822e+07	13365714	1.24792e+07	1.24089e+07	1.16714e+07
pos-5.72_527.29972	527.3	5.72	pe(0:0/22:5(4z,7z,10z,13z,16z))	C27H46NO7P									5.64576e+07	4.66602e+07	9.02361e+07	109520574	1.33984e+08	1.85611e+08	1.23167e+08	1.06024e+08	1.18535e+08	1.44265e+08	6.9734e+07	126034448	2.4095e+07	7.11761e+07	4.2012e+07	3.12982e+07	7.50358e+07	6.42316e+07	6.31751e+07	6.32063e+07	5.65407e+07	4.81687e+07	4.67359e+07
pos-5.612_527.29964	527.3	5.612	pe(0:0/22:5(4z,7z,10z,13z,16z))	C27H46NO7P									2.92535e+08	6.27113e+07	1.38745e+07	1.24643e+07	8.72346e+07	7.59365e+07	4.18181e+07	3.19609e+07	4.01824e+07	2.252e+07	4.72904e+07	5.66453e+07	1.53924e+08	1.06284e+08	7.69748e+07	4.66754e+07	4.44049e+07	4.27611e+07	3.62854e+07	3.53977e+07	3.87575e+07	3.24101e+07	3.4223e+07
pos-5.237_527.29961	527.3	5.237	pe(0:0/22:5(4z,7z,10z,13z,16z))	C27H46NO7P									1.57726e+06	956436	195445	284910	2.29316e+06	458808	874712	1.18651e+06	1.13268e+06	540109	253147	3.08344e+06	7.66635e+06	2.54273e+07	2.82089e+06	7.7736e+06	4.56896e+06	3.16171e+06	3.36237e+06	2.96358e+06	2.84939e+06	2.5792e+06	2.6917e+06
neg-5.331_525.28469	525.285	5.331	pe(22:6(4z,7z,10z,13z,16z,19z)/0:0)	C27H44NO7P	HMDB0011526	Lipids and lipid-like molecules	Glycerophospholipids						4.03688e+08	3.2873e+08	5.38074e+08	3.50567e+08	434057558	3.04767e+08	3.62178e+08	1.46102e+08	2.70105e+08	3.7646e+08	1.59035e+08	2.80166e+08	2.28991e+08	2.69962e+08	3.16411e+08	2.68353e+08	2.24684e+08	2.2197e+08	2.25074e+08	2.13423e+08	227277686	2.2537e+08	2.13727e+08
pos-0.754_225.94371	225.944	0.754	2,5-dichloro-4-oxohex-2-enedioate	C6H4Cl2O5	HMDB0060363	Organic acids and derivatives	Keto acids and derivatives	C12835	Metabolism|Metabolism|Metabolism	Xenobiotics biodegradation and metabolism|Global and overview maps|Global and overview maps	Chlorocyclohexane and chlorobenzene degradation|Metabolic pathways|Microbial metabolism in diverse environments	map00361|map01100|map01120	2.20657e+07	3.35797e+06	1.13367e+06	2.51933e+06	2.23118e+08	3.91248e+08	3.86266e+08	1.90978e+08	2.39607e+06	1.29326e+06	3.00427e+06	2.06901e+06	1.65495e+06	2.48982e+06	1.52877e+06	1.52913e+06	1.27979e+07	1.24222e+07	1.29022e+07	1.28791e+07	1.31199e+07	1.27356e+07	13353865
neg-4.165_138.03139	138.031	4.165	2,5-dihydroxybenzaldehyde	C7H6O3	HMDB0004062	Organic oxygen compounds	Organooxygen compounds	C05585	Metabolism|Metabolism|Metabolism	Amino acid metabolism|Global and overview maps|Global and overview maps	Tyrosine metabolism|Metabolic pathways|Microbial metabolism in diverse environments	map00350|map01100|map01120	2.21418e+06	831579	1.29323e+06	999460	3.64502e+06	5.41022e+06	1.78956e+06	2.54092e+06	926205	1.01477e+06	878626	1.20322e+06	1.08195e+06	701691	627513	653332	927898	1.10868e+06	812291	893524	778105	774559	686217
pos-7.37_240.20828	240.208	7.37	2,5-dimethyl-2e-tridecenoic acid	C15H28O2									807177	733038	1.32712e+06	1.41372e+06	811412	1.31195e+06	477351	554029	831056	510457	708836	638357	1.03375e+06	1.29037e+06	1.79643e+06	1.03152e+06	1.44653e+06	1.34151e+06	900021	1.13859e+06	977887	913168	1.12988e+06
pos-4.336_166.13529	166.135	4.336	2,5-undecadienal	C11H18O	HMDB0033546	Organic oxygen compounds	Organooxygen compounds						1.28104e+07	8.11167e+06	9.42137e+06	1.17457e+07	4.87865e+06	2.02766e+07	1.06106e+07	3.67281e+06	5.89043e+06	7.05299e+06	8.46031e+06	9.693e+06	4.14104e+06	5.23747e+06	5.63391e+06	2.60457e+06	7.19856e+06	7.68564e+06	7.24875e+06	7.05585e+06	7.12183e+06	6.13809e+06	7.05478e+06
pos-6.154_218.20287	218.203	6.154	2,6,10-trimethyl-(e,e)-2,6,10,12-tridecatetraene	C16H26									207141	285930	122793	603679	738623	654047	570715	709623	102088	253006	391603	391471	390985	545121	309258	246034	295652	298791	349689	337182	271236	522263	429679
pos-4.608_218.20268	218.203	4.608	2,6,10-trimethyl-(e,e)-2,6,10,12-tridecatetraene	C16H26									745173	156221	176975	106196	417463	988420	316311	416015	173896	191515	364803	502219	701072	788318	388743	589327	982892	1.12557e+06	633793	915950	731811	529459	602486
pos-1.532_234.12101	234.121	1.532	2,6-diamino-7-hydroxynonanedioic acid	C9H18N2O5									98400.3	658938	1.28819e+06	680500	661401	121437	269795	1.66988e+06	1.03318e+06	1.0493e+06	589912	379171	189652	215721	953298	1.01216e+06	742961	739781	667109	739544	804390	750693	722259
pos-0.671_234.12151	234.122	0.671	2,6-diamino-7-hydroxynonanedioic acid	C9H18N2O5									1.05597e+06	1.68857e+06	834059	802704	1.64673e+06	625183	463111	1.27117e+06	2.75058e+06	3.18951e+06	2.15179e+06	1.46104e+06	706719	446954	1.29003e+06	2.56831e+06	1.44179e+06	1.3469e+06	1.531e+06	1.18663e+06	927087	1.28379e+06	1.43737e+06
pos-4.7_212.1558	212.156	4.7	2,6-di-iso-propylnaphthalene	C16H20									5.23704e+07	4.25653e+07	5.58487e+06	8.73021e+06	830148	3.47256e+06	6.65426e+07	2.33547e+07	3.18534e+07	1.91378e+07	6.85689e+06	2.12785e+07	2.72414e+07	3.12153e+07	1.87325e+07	3.65704e+07	2.56387e+07	2.7892e+07	2.46289e+07	2.45743e+07	2.49916e+07	2.80365e+07	2.71288e+07
pos-5.51_212.15587	212.156	5.51	2,6-di-iso-propylnaphthalene	C16H20									864152	470498	1.21785e+06	979284	319661	1.49942e+06	383145	583764	290791	225467	626963	804989	543661	304410	604432	309032	322642	341241	465893	561334	345226	587990	573502
pos-6.107_212.15586	212.156	6.107	2,6-di-iso-propylnaphthalene	C16H20									1.15362e+07	8.28922e+06	1.00509e+07	1.44557e+07	6.0216e+06	1.244e+07	2.16399e+06	1.02801e+07	6.01313e+06	7.85728e+06	6.78365e+06	6.54323e+06	1.00312e+07	9.85592e+06	7.38365e+06	5.17636e+06	7.69529e+06	8.44065e+06	7.83527e+06	7.32399e+06	7.06624e+06	6.09151e+06	5.76014e+06
pos-4.228_156.09343	156.093	4.228	2,6-dimethylnaphthalene	C12H12	HMDB0059764	Benzenoids	Naphthalenes	C14330					546338	733486	389224	456137	362405	1.39311e+06	959936	244901	2.98867e+06	318514	405694	546191	395648	541869	672395	402470	546141	577733	575152	553101	417618	540298	578619
pos-6.819_156.09354	156.094	6.819	2,6-dimethylnaphthalene	C12H12	HMDB0059764	Benzenoids	Naphthalenes	C14330					529192	246850	504961	2.03446e+06	814643	1.73461e+06	503683	945196	246152	354578	680560	459508	383803	746404	299590	181404	363095	396023	416121	364639	356013	467981	476264
pos-4.709_156.09342	156.093	4.709	2,6-dimethylnaphthalene	C12H12	HMDB0059764	Benzenoids	Naphthalenes	C14330					2.90287e+07	2.34341e+07	6.19336e+06	7.09117e+06	664233	8.79173e+06	3.86718e+07	1.70355e+07	20151261	1.26635e+07	5.05241e+06	1.2137e+07	1.51319e+07	2.08785e+07	1.14772e+07	2.54502e+07	1.48282e+07	1.60853e+07	1.49032e+07	1.42748e+07	1.43612e+07	1.59335e+07	1.48065e+07
pos-6.108_156.09345	156.093	6.108	2,6-dimethylnaphthalene	C12H12	HMDB0059764	Benzenoids	Naphthalenes	C14330					9.69194e+06	6.64021e+06	5.86643e+06	1.18142e+07	4.83703e+06	1.02933e+07	2.1419e+06	9.63204e+06	5.24553e+06	6.20407e+06	7.21337e+06	3.35052e+06	7.75234e+06	9.54441e+06	6.27447e+06	4.73078e+06	6.54641e+06	7.05705e+06	6.79505e+06	6.54695e+06	6.43679e+06	5.20326e+06	5.11403e+06
pos-5.573_156.09345	156.093	5.573	2,6-dimethylnaphthalene	C12H12	HMDB0059764	Benzenoids	Naphthalenes	C14330					1.43674e+06	983413	2.28633e+06	4.36768e+06	1.71402e+06	2.63123e+06	349228	1.19415e+06	1.17871e+06	1.16884e+06	4.54657e+06	2.00954e+06	808505	1.14343e+06	613411	437191	1.30648e+06	1.44263e+06	1.16085e+06	1.34843e+06	1.01723e+06	854107	1.2396e+06
pos-6.579_156.09351	156.094	6.579	2,6-dimethylnaphthalene	C12H12	HMDB0059764	Benzenoids	Naphthalenes	C14330					2.07562e+06	881830	1.35856e+06	4.02374e+06	1.25991e+06	1.94488e+06	348030	879211	649153	717472	1.20696e+06	1.46408e+06	1.14271e+06	607891	524168	499436	679528	680159	662007	570508	565946	747753	804640
pos-4.335_184.14576	184.146	4.335	2,7-dimethyl-6-nonenoic acid	C11H20O2									1.01451e+07	5.82782e+06	7.31366e+06	8.98528e+06	2.96419e+06	1.59759e+07	7.89833e+06	2.04624e+06	5.25275e+06	6.26603e+06	7.19557e+06	8.1892e+06	3.6624e+06	4.65662e+06	4.14759e+06	1.73119e+06	4.89414e+06	4.90691e+06	5.18126e+06	5.5976e+06	4.97507e+06	4.87726e+06	5.09082e+06
neg-4.908_541.09465	541.095	4.908	2-[({[5-(4-amino-2-oxo-1(2h)-pyrimidinyl)-3,4-dihydroxytetrahydro-2-furanyl]methoxy}phosphinato)oxy]-6-(1,2-dihydroxyethyl)-4,5-dihydroxytetrahydro-2h-pyran-2-carboxylate										2.95562e+06	1.31452e+06	2.01589e+06	3.23705e+06	81326.7	7.68586e+06	1.62152e+06	7.08526e+06	7.90949e+06	4.67334e+06	7.17354e+06	6.68725e+06	2.18679e+06	1.63595e+06	1.00993e+06	455462	2.50937e+06	2.11859e+06	2.50417e+06	2.85649e+06	1.88993e+06	1.88726e+06	2.52631e+06
neg-3.775_321.12423	321.124	3.775	2-[(1h-indol-3-ylacetyl)amino]-3-phenylpropanoate	C14H27NOS3									5.78866e+06	167896	148144	184371	633108	4.0883e+06	4.35409e+06	717976	734374	2.16637e+06	2.47718e+06	1.70227e+06	1.818e+06	1.4809e+06	4.28482e+06	208869	1.68757e+06	1.69166e+06	1.86423e+06	1.74401e+06	1.60944e+06	1.60621e+06	1.26938e+06
pos-4.061_379.08446	379.084	4.061	2-[2-[4-[bis(2-chloroethyl)amino]-2-methylphenyl]diazenyl]benzoic acid	C18H19Cl2N3O2									493679	1.10154e+06	159847	329658	1.79883e+06	4.34828e+06	1.77782e+07	3.58442e+06	148400	168465	210473	261887	504493	846145	477815	167170	325660	601026	546090	688634	662776	617876	567720
pos-0.903_270.1327	270.133	0.903	2-[3-carboxylato-3-(methylammonio)propyl]-l-histidine dizwitterion	C11H18N4O4									6.71422e+06	1.22467e+07	2.89469e+06	5.56651e+06	5.90789e+06	7.88658e+06	3.49101e+06	3.81591e+06	7.36838e+06	1.46686e+07	5.93716e+06	6.2338e+06	5.9017e+06	3.80664e+06	1.22999e+07	6.13373e+06	6.20524e+06	6.86932e+06	8.80136e+06	5.12414e+06	5.12371e+06	5.17759e+06	5.90521e+06
pos-1.557_270.13231	270.132	1.557	2-[3-carboxylato-3-(methylammonio)propyl]-l-histidine dizwitterion	C11H18N4O4									258209	3.12388e+06	628554	3.45005e+06	325192	2.22306e+06	279825	362678	912090	1.39345e+06	735029	1.68397e+06	566848	858311	2.98506e+06	1.78424e+06	1.63535e+06	1.64976e+06	1.75966e+06	1.72974e+06	1.17658e+06	2.2295e+06	1.40078e+06
neg-3.921_256.13089	256.131	3.921	2-[4-(3-hydroxypropyl)-2-methoxyphenoxy]-1,3-propanediol	C13H20O5	HMDB0040352	Benzenoids	Phenol ethers						67254.8	21963.7	16158.8	101605	106245	258836	72426.3	87711.4	37377.9	30461	94559.3	121151	134760	149497	249515	217330	126526	122301	139285	152160	115677	188733	106938
pos-1.376_161.06841	161.068	1.376	2_2'-iminodipropanoate	C6H11NO4									3.47172e+07	1.91403e+07	2.04663e+07	2.24123e+07	5.69073e+07	59912607	3.35288e+07	3.21384e+07	1.60267e+07	4.9124e+07	1.4208e+07	2.77624e+07	2.50261e+07	2.10057e+07	1.4811e+07	1.52442e+07	1.43462e+07	1.78714e+07	1.58922e+07	1.15395e+07	2.04689e+07	1.90312e+07	1.84955e+07
neg-0.884_161.06841	161.068	0.884	2_2'-iminodipropanoate	C6H11NO4									1.24151e+07	1.65586e+06	1.77513e+06	3.82983e+06	1.35083e+07	2.40817e+06	1.47023e+07	4.44455e+06	3.39523e+06	1.64492e+06	2.79354e+06	1.44471e+06	4.5581e+06	3.45699e+06	1.96855e+06	3.0152e+06	2.88757e+06	2.7131e+06	2.481e+06	2.54536e+06	2.38216e+06	2.45002e+06	2.51999e+06
neg-1.514_161.06841	161.068	1.514	2_2'-iminodipropanoate	C6H11NO4									5.91409e+06	3.68695e+06	3.01298e+06	3.33069e+06	7.87906e+06	5.01566e+06	4.96114e+06	3.78112e+06	2.15249e+06	1.7709e+06	1.99024e+06	1.93788e+06	3.12368e+06	1.88784e+06	2.38829e+06	2.91469e+06	2.21403e+06	2.24283e+06	2.2672e+06	2.56689e+06	2.51524e+06	2.6338e+06	2.80378e+06
pos-3.436_161.06903	161.069	3.436	2_2'-iminodipropanoate	C6H11NO4									812046	568570	855602	820982	1.03366e+06	1.15629e+06	1.0994e+06	736522	3.04486e+06	1.75616e+06	3.45378e+06	2.63933e+06	1.28492e+06	428910	2.8512e+06	2.96318e+06	1.20891e+06	1.74969e+06	1.50944e+06	1.1268e+06	1.06057e+06	1.74296e+06	1.2527e+06
pos-6.327_140.04701	140.047	6.327	2_3_5-trihydroxytoluene	C7H8O3									2.88836e+06	2.11987e+06	3.61494e+06	5.36552e+06	1.86084e+06	4.0895e+06	1.0405e+06	4.11984e+06	1.98479e+06	2.08588e+06	2.2213e+06	2.90953e+06	2.50666e+06	2.76483e+06	2.35096e+06	1.99795e+06	2.73691e+06	2.37442e+06	2.30243e+06	2.24224e+06	2.16383e+06	2.07268e+06	2.31717e+06
pos-4.483_329.05239	329.052	4.483	2'_3'-cyclicamp	C10H12N5O6P									556296	936199	499185	64039.8	103913	1.19608e+06	2.89398e+06	715605	35449.6	29155.8	45979.6	50915.3	54522.1	52185.4	60082	28265.7	254684	217007	191281	187032	153681	184009	135458
neg-4.496_329.05323	329.053	4.496	2'_3'-cyclicamp	C10H12N5O6P									657777	1.9459e+06	797713	55992.9	224340	1.46099e+06	3.45344e+06	1.13734e+06	57434.2	20275.6	29930	34605.2	117410	100737	115888	23627.3	268846	236908	270080	228607	273332	303148	288174
neg-1.368_156.0419	156.042	1.368	2_3-dihydro-2_3-dihydroxybenzoate	C7H8O4									1.24169e+06	2.23576e+06	6.2448e+06	3.26461e+06	1.00229e+07	2.81124e+06	2.79276e+06	1.07766e+07	1.61785e+06	1.25371e+06	1.35091e+06	1.99882e+06	2.8328e+06	1.58881e+06	791601	3354619	2.75149e+06	2.36241e+06	2.98094e+06	1.88114e+06	2.44108e+06	2.00619e+06	1.89806e+06
neg-0.911_156.04189	156.042	0.911	2_3-dihydro-2_3-dihydroxybenzoate	C7H8O4									4.15286e+06	3.14497e+06	5.36322e+06	3.57063e+06	1.11512e+07	5.34764e+06	4.42404e+06	1.11712e+07	4.24775e+06	3.42348e+06	5.59493e+06	3.95101e+06	5.36961e+06	3.03748e+06	1.37736e+06	4.67508e+06	3.69227e+06	4.6328e+06	3.55e+06	3.84696e+06	4.16401e+06	3.05562e+06	3.21728e+06
neg-1.364_144.04174	144.042	1.364	2_3-dimethylmaleate	C6H8O4									124830646	2.26846e+08	2.74948e+08	2.3158e+08	1418474277	2.78801e+08	2.45663e+08	9.54966e+08	2.34215e+08	1.52456e+08	1.40329e+08	2.07299e+08	2.87891e+08	1.50115e+08	9.42489e+07	275848638	1.98454e+08	2.43094e+08	1.90358e+08	2.60037e+08	2.58512e+08	2.07155e+08	2.53949e+08
neg-0.871_144.04186	144.042	0.871	2_3-dimethylmaleate	C6H8O4									5.305e+06	1.54029e+07	1.51956e+07	1.7077e+07	1.19494e+07	1.54378e+07	3.96207e+06	7.32997e+06	1.01773e+07	1.089e+07	1.10636e+07	1.61009e+07	8.60594e+06	9.69951e+06	8.60911e+06	6.0415e+06	8.90902e+06	8.98307e+06	7.42606e+06	9.62902e+06	7.03516e+06	9.27297e+06	8.42514e+06
neg-5.422_525.28467	525.285	5.422	pe(22:6(4z,7z,10z,13z,16z,19z)/0:0)	C27H44NO7P	HMDB0011526	Lipids and lipid-like molecules	Glycerophospholipids						1668451561	6.05328e+08	4.91362e+08	3.41359e+08	1210152569	1025122269	8.22224e+08	2.1179e+08	4.63343e+08	4.73757e+08	5.10248e+08	4.67207e+08	9.22387e+08	5.8139e+08	5.08982e+08	4.15312e+08	4.05035e+08	4.16442e+08	4.23328e+08	4.14391e+08	4.49658e+08	4.11271e+08	4.10775e+08
pos-5.324_525.28394	525.284	5.324	pe(22:6(4z,7z,10z,13z,16z,19z)/0:0)	C27H44NO7P	HMDB0011526	Lipids and lipid-like molecules	Glycerophospholipids						9.54887e+08	456020953	7.9239e+08	5.26993e+08	8.11185e+08	8.09856e+08	6.64429e+08	4.69998e+08	4.45385e+08	499657237	2.39519e+08	5.18634e+08	4.0741e+08	6.09859e+08	5.64567e+08	3.57799e+08	5.71456e+08	4.28592e+08	4.08355e+08	3.67129e+08	3.98816e+08	3.68578e+08	3.63908e+08
pos-0.712_230.05739	230.057	0.712	2_4_6-trihydroxybenzophenone	C13H10O4									1.20252e+08	1.53201e+07	1.18444e+07	1.70657e+07	4.94772e+07	3.25053e+07	2.84855e+07	1.6288e+07	1.3222e+07	1.32052e+07	1.72396e+07	1.73105e+07	2.32701e+07	1.91732e+07	1.44103e+07	1.63307e+07	1.68214e+07	1.59241e+07	1.64724e+07	1.75759e+07	1.97365e+07	1.67355e+07	1.71357e+07
neg-3.804_152.04696	152.047	3.804	2'_4'-dihydroxyacetophenone	C8H8O3									284103	127319	131134	225017	1.42765e+06	759687	857686	804022	91221.2	358748	130809	80888.4	173963	939337	285807	287659	181368	238420	165876	170858	237229	208060	216476
neg-1.368_154.02617	154.026	1.368	2_4-dihydroxybenzoicacid	C7H6O4									560421	1.21409e+06	1.6918e+06	1.39895e+06	5.49864e+06	1.54745e+06	1.68398e+06	6.04558e+06	1.33206e+06	822263	763399	980298	1.61491e+06	988712	457560	1.94187e+06	1.08812e+06	951520	1.06629e+06	948707	1.18924e+06	990990	1.08628e+06
pos-0.838_111.03179	111.032	0.838	2_5-dihydroxypyridine	C5H5NO2									2.98714e+07	1.33346e+07	1.18603e+07	3.23217e+07	2.2202e+07	2.74461e+07	1.16625e+07	3.98835e+07	1.33131e+07	1.12109e+07	1.96185e+07	2.38205e+07	8.65883e+06	1.9737e+07	1.34649e+07	1.00589e+07	1.52848e+07	1.44875e+07	2.30115e+07	2.20035e+07	1.90333e+07	1.31049e+07	1.3717e+07
neg-0.916_111.03175	111.032	0.916	2_5-dihydroxypyridine	C5H5NO2									1.12115e+07	6.41745e+06	4.16648e+06	4.19784e+06	1.14861e+07	5.63188e+06	3.49999e+06	5.80389e+06	5.26348e+06	5.64368e+06	5.13563e+06	7.2079e+06	8.24574e+06	3.65424e+06	3.52659e+06	4.33359e+06	3.80598e+06	3.68677e+06	3.86119e+06	3.97911e+06	3.4815e+06	4.36486e+06	4.44217e+06
pos-1.362_190.09485	190.095	1.362	2_6-diaminoheptanedioicacid	C7H14N2O4									2.3568e+07	8.13509e+06	8.07109e+06	9.1358e+06	1.83346e+07	1.12653e+07	8.635e+06	1.56905e+07	1.15863e+07	1.07493e+07	8.2798e+06	9.33782e+06	8.58965e+06	6.86766e+06	8.6673e+06	8.49359e+06	7.9588e+06	6.90337e+06	6.31274e+06	8.62213e+06	9.51766e+06	8.20688e+06	9.20503e+06
pos-0.854_190.09597	190.096	0.854	2_6-diaminoheptanedioicacid	C7H14N2O4									3.84341e+06	2.75997e+06	1.99161e+06	3.22058e+06	3.83341e+06	3.37068e+06	1.6214e+06	2.60292e+06	4.17824e+06	2.62684e+06	3.50796e+06	2.33401e+06	2.38362e+06	2.628e+06	2.93671e+06	4.39382e+06	1.70966e+06	2.12358e+06	2.02899e+06	1.67468e+06	1.99399e+06	2.45878e+06	2.17444e+06
[truncated: 5,057 more rows]
